# Supplementary material for: miRNA gene mutations commonly disrupt the proper functioning of miRNA genes
Source: Research Square preprint supplement (doi:10.21203/rs.3.rs-7029847/v1), 2025-07-21
Supplement: Supplementary file 1 [file 095aa1678b4a9fd68bbb605f.xlsx]

## Sheet: Supplementary Table S8
sample_ID	cancer_type	miRNA_gene	miRBase_ID	chromosome	miRNA_gene_orientation	miRNA_strand_balance	mutation_position	mutation_ID_COSMIC	mutation_subregion	pos_mut_mature_miRNA	pos_mut_loop	pos_mut_flank	reference_allele	alternative_allele	wt_miRNA_precursor_lowest_dG_[kcal/mol]	mut_miRNA_precursor_lowest_dG_[kcal/mol]	affected_effect	significant_in_Experiment
TCGA-A5-A0GP-01A-11R-A041-13	UCEC	MIR10B	hsa-mir-10b	chr2	+	5p	176150342	COSN1082679	non-seed duplex_5p	14	NA	NA	C	T	-45	-43.4	level	Experiment_1
TCGA-05-4397-01A-01T-1207-13	LUAD	MIR127	hsa-mir-127	chr14	+	3p	100883038	COSM6075319	seed_3p	4	NA	NA	G	T	-43.1	-37.4	level	Experiment_1
TCGA-A6-6141-01A-11H-1773-13	COAD	MIR136	hsa-mir-136	chr14	+	both	100884768	COSM1368270	non-seed duplex_3p	19	NA	NA	G	A	-49.8	-43.9	level	Experiment_1
TCGA-ER-A193-06A-12R-A18V-13	SKCM	MIR136	hsa-mir-136	chr14	+	both	100884719	COSM3493815	seed_5p	4	NA	NA	C	T	-49.8	-49.8	level	Experiment_1
TCGA-23-2081-01A-01R-1568-13	OV	MIR139	hsa-mir-139	chr11	-	5p	72615081	COSN18246415	seed_3p	8	NA	NA	C	T	-51.4	-51.8	level	Experiment_1
TCGA-EW-A1IX-01A-12R-A143-13	BRCA	MIR142	hsa-mir-142	chr17	-	both	58331303	COSN23015190	non-seed duplex_5p	1	NA	NA	G	T	-44.9	-40.6	level	Experiment_1
TCGA-MI-A75C-01A-11R-A32J-13	LIHC	MIR186	hsa-mir-186	chr1	-	5p	71067697	COSN16303119	seed_5p	6	NA	NA	T	A	-41.2	-37.3	level	Experiment_1
TCGA-29-1762-01A-01R-1567-13	OV	MIR195	hsa-mir-195	chr17	-	5p	7017648	COSN518969	seed_3p	2	NA	NA	G	C	-48.2	-43.8	level	Experiment_1
TCGA-EE-A17X-06A-11R-A18V-13	SKCM	MIR197	hsa-mir-197	chr1	+	3p	109598948	COSN5026096	non-seed duplex_3p	9	NA	NA	C	A	-50.3	-44	level	Experiment_1
TCGA-XV-A9W5-01A-11R-A38N-13	SKCM	MIR205	hsa-mir-205	chr1	+	5p	209432167	COSN2378349	seed_5p	2	NA	NA	C	T	-46.7	-46.5	level	Experiment_1
TCGA-A6-6653-01A-11H-1773-13	COAD	MIR20A	hsa-mir-20a	chr13	+	5p	91351125	COSN23012485	non-seed duplex_3p	18	NA	NA	T	TA	-42	-41.8	level	Experiment_1
TCGA-DK-A1AC-01A-11R-A13X-13	BLCA	MIR25	hsa-mir-25	chr7	-	3p	100093572	COSN514173	non-seed duplex_3p	21	NA	NA	C	T	-45.3	-42.6	level	Experiment_1
TCGA-AA-3710-01A-01T-1021-13	COAD	MIR28	hsa-mir-28	chr3	+	both	188688799	COSN18185224	seed_5p	6	NA	NA	G	T	-50.9	-44.3	level	Experiment_1
TCGA-69-7979-01A-11H-2186-13	LUAD	MIR296	hsa-mir-296	chr20	-	both	58817665	COSN24410955	non-seed duplex_5p	17	NA	NA	G	A	-46.6	-44	level	Experiment_1
TCGA-HT-7476-01A-11R-2026-13	LGG	MIR323A	hsa-mir-323a	chr14	+	3p	101025761	COSN20052415	non-seed duplex_5p	15	NA	NA	G	A	-38.7	-38.7	level	Experiment_1
TCGA-DR-A0ZM-01A-12R-A10V-13	CESC	MIR328	hsa-mir-328	chr16	-	3p	67202338	COSN2376590	non-seed duplex_3p	11	NA	NA	G	A	-60.2	-56.8	level	Experiment_1
TCGA-D3-A8GO-06A-11R-A37G-13	SKCM	MIR335	hsa-mir-335	chr7	+	5p	130496140	COSN23016863	non-seed duplex_5p	15	NA	NA	G	A	-42.5	-39.1	level	Experiment_1
TCGA-95-7039-01A-11H-1948-13	LUAD	MIR379	hsa-mir-379	chr14	+	5p	101022087	COSN24410139	non-seed duplex_5p	17	NA	NA	G	T	-37.8	-33.9	level	Experiment_1
TCGA-AX-A3G9-01A-11R-A22I-13	UCEC	MIR379	hsa-mir-379	chr14	+	5p	101022086	COSN18715117	non-seed duplex_5p	16	NA	NA	C	T	-37.8	-35.3	level	Experiment_1
TCGA-78-7535-01A-11H-2065-13	LUAD	MIR379	hsa-mir-379	chr14	+	5p	101022087	COSN24410139	non-seed duplex_5p	17	NA	NA	G	T	-37.8	-33.9	level	Experiment_1
TCGA-C4-A0EZ-01A-21R-A24Y-13	BLCA	MIR424	hsa-mir-424	chrX	-	5p	134546697	COSM422225	seed_5p	5	NA	NA	T	A	-53.2	-48.6	level	Experiment_1
TCGA-G3-A25Y-01A-11R-A16S-13	LIHC	MIR425	hsa-mir-425	chr3	-	5p	49020176	COSN16303086	seed_3p	5	NA	NA	C	T	-39.3	-33.7	level	Experiment_1
TCGA-HR-A2OG-06A-21R-A18X-13	SKCM	MIR432	hsa-mir-432	chr14	+	5p	100884501	COSM3493811	seed_5p	6	NA	NA	G	A	-47.2	-40.4	level	Experiment_1
TCGA-G3-A5SM-01A-12R-A28Z-13	LIHC	MIR452	hsa-mir-452	chrX	-	5p	151959683	COSN16303043	non-seed duplex_5p	17	NA	NA	T	A	-44.1	-44.1	level	Experiment_1
TCGA-05-4390-01A-02T-1754-13	LUAD	MIR500A	hsa-mir-500a	chrX	+	3p	50008488	COSN24409322	seed_3p	7	NA	NA	C	A	-39.2	-34.9	level	Experiment_1
TCGA-EE-A2M5-06A-12R-A18V-13	SKCM	MIR127	hsa-mir-127	chr14	+	3p	100883041	COSM3493809	seed_3p	7	NA	NA	C	T	-43.1	-40.8	level; isomiR_profile	Experiment_1; Experiment_2
TCGA-D1-A16Y-01A-31R-A12H-13	UCEC	MIR1307	hsa-mir-1307	chr10	-	both	103394308	COSN1079925	non-seed duplex_3p	15	NA	NA	G	A	-40.8	-38.8	level; isomiR_profile	Experiment_1; Experiment_2
TCGA-AB-2807-03A-01T-0734-13	LAML	MIR142	hsa-mir-142	chr17	-	both	58331264	COSN187665	seed_3p	4	NA	NA	T	C	-44.9	-44.6	level; isomiR_profile	Experiment_1; Experiment_2
TCGA-G3-A25S-01A-11R-A16S-13	LIHC	MIR629	hsa-mir-629	chr15	-	5p	70079433	COSN16303140	non-seed duplex_5p	15	NA	NA	C	A	-74.8	-68	level; isomiR_profile	Experiment_1; Experiment_2
TCGA-DK-A1AC-01A-11R-A13X-13	BLCA	MIR523	hsa-mir-523	chr19	+	5p	53698419	COSN513937	non-seed duplex_5p	20	NA	NA	C	T	-51.4	-48.8	level	Experiment_1; Experiment_3
TCGA-DI-A0WH-01A-12R-A12H-13	UCEC	MIR27A	hsa-mir-27a	chr19	-	3p	13836448	COSN2382145	non-seed duplex_3p	20	NA	NA	C	T	-53	-48	level; isomiR_profile	Experiment_1; Experiment_4
TCGA-EE-A2MR-06A-11R-A18V-13	SKCM	MIR365B	hsa-mir-365b	chr17	+	3p	31575494	COSN5027839	non-seed duplex_3p	17	NA	NA	C	T	-41.3	-38.5	level; strand_balance	Experiment_1; Experiment_5
TCGA-FA-A4BB-01A-11R-A31S-13	DLBC	MIR142	hsa-mir-142	chr17	-	both	58331260	COSN4769864	seed_3p	8	NA	NA	A	G	-44.9	-47.3	isomiR_profile	Experiment_2
TCGA-46-3769-01A-01T-0981-13	LUSC	MIR196B	hsa-mir-196b	chr7	-	5p	27169539	COSN2378927	non-seed duplex_5p	11	NA	NA	G	A	-36.2	-34.5	isomiR_profile	Experiment_2
TCGA-DQ-5624-01A-01R-1872-13	HNSC	MIR320A	hsa-mir-320a	chr8	-	3p	22244987	COSN2378943	non-seed duplex_3p	10	NA	NA	C	T	-57.9	-53.9	isomiR_profile	Experiment_2
TCGA-55-8089-01A-11H-2240-13	LUAD	MIR320A	hsa-mir-320a	chr8	-	3p	22244987	COSN24411655	non-seed duplex_3p	10	NA	NA	C	A	-57.9	-53.9	isomiR_profile	Experiment_2
TCGA-D9-A149-06A-11R-A18V-13	SKCM	MIR342	hsa-mir-342	chr14	+	3p	100109729	COSN1080961	non-seed duplex_3p	15	NA	NA	C	T	-51.4	-52.1	isomiR_profile	Experiment_2
TCGA-FR-A8YC-06A-11R-A37G-13	SKCM	MIR342	hsa-mir-342	chr14	+	3p	100109729	COSN1080961	non-seed duplex_3p	15	NA	NA	C	T	-51.4	-52.1	isomiR_profile	Experiment_2
TCGA-BC-A112-01A-11R-A130-13	LIHC	MIR122	hsa-mir-122	chr18	+	5p	58451077	NA	flanking-5	NA	NA	-11	TAGC	T	-46.5	-38.6	level	Experiment_3
TCGA-93-7348-01A-21H-2038-13	LUAD	MIR134	hsa-mir-134	chr14	+	5p	101054684	NA	flanking-5	NA	NA	-10	G	A	-42.1	-41.8	level	Experiment_3
TCGA-BR-8361-01A-11R-2343-13	STAD	MIR147B	hsa-mir-147b	chr15	+	3p	45433140	NA	flanking-3	NA	NA	22	AT	A	-38.8	-38.8	level	Experiment_3
TCGA-AN-A0FL-01A-11R-A035-13	BRCA	MIR193A	hsa-mir-193a	chr17	+	both	31560083	NA	flanking-3	NA	NA	12	G	T	-52.8	-52.1	level	Experiment_3
TCGA-90-A4ED-01A-31H-A25B-13	LUSC	MIR22	hsa-mir-22	chr17	-	3p	1713996	NA	flanking-5	NA	NA	-23	G	A	-46.3	-47	level	Experiment_3
TCGA-LL-A6FP-01A-11R-A31S-13	BRCA	MIR221	hsa-mir-221	chrX	-	3p	45746207	NA	loop	NA	14	NA	C	T	-47.2	-47.9	level	Experiment_3
TCGA-EE-A2A2-06A-11R-A18W-13	SKCM	MIR320A	hsa-mir-320a	chr8	-	3p	22245033	NA	flanking-5	NA	NA	-5	G	A	-57.9	-59.5	level	Experiment_3
TCGA-78-7536-01A-11H-2065-13	LUAD	MIR340	hsa-mir-340	chr5	-	5p	180015350	COSN24411365	loop	NA	11	NA	C	T	-36	-36	level	Experiment_3
TCGA-44-7667-01A-31H-2065-13	LUAD	MIR483	hsa-mir-483	chr11	-	both	2134174	COSN24409740	loop	NA	7	NA	G	T	-55.3	-55.3	level	Experiment_3
TCGA-37-3789-01A-01T-0981-13	LUSC	MIR495	hsa-mir-495	chr14	+	3p	101033788	COSN2378433	non-seed duplex_5p	21	NA	NA	C	T	-35.8	-33.7	level	Experiment_3
TCGA-B5-A0JV-01A-11R-A103-13	UCEC	MIR500A	hsa-mir-500a	chrX	+	3p	50008517	NA	flanking-3	NA	NA	14	C	T	-39.2	-38.7	level	Experiment_3
TCGA-53-7624-01A-11H-2065-13	LUAD	MIR518E	hsa-mir-518e	chr19	+	5p	53729922	NA	flanking-3	NA	NA	11	G	A	-48.3	-43.7	level	Experiment_3
TCGA-EE-A182-06A-11R-A18W-13	SKCM	MIR519D	hsa-mir-519d	chr19	+	3p	53713381	COSN5028201	non-seed duplex_5p	21	NA	NA	C	T	-42.6	-42.6	level	Experiment_3
TCGA-EE-A3AG-06A-31R-A18V-13	SKCM	MIR520A	hsa-mir-520a	chr19	+	both	53690978	NA	flanking-3	NA	NA	24	G	A	-51	-51	level	Experiment_3
TCGA-D9-A1JX-06A-11R-A18V-13	SKCM	MIR520A	hsa-mir-520a	chr19	+	both	53690957	COSN15625239	flanking-3	NA	NA	3	C	T	-51	-48.7	level	Experiment_3
TCGA-DK-A1AC-01A-11R-A13X-13	BLCA	MIR520F	hsa-mir-520f	chr19	+	3p	53682157	NA	flanking-5	NA	NA	-16	G	T	-54.2	-54.3	level	Experiment_3
TCGA-EE-A29P-06A-11R-A18W-13	SKCM	MIR520F	hsa-mir-520f	chr19	+	3p	53682244	NA	flanking-3	NA	NA	10	G	A	-54.2	-49.6	level	Experiment_3
TCGA-BR-4362-01A-01R-1157-13	STAD	MIR6720	hsa-mir-6720	chr6	-	both	1390312	NA	flanking-3	NA	NA	12	C	T	-44.7	-44.7	level	Experiment_3
TCGA-13-0904-01A-02R-1564-13	OV	MIR100	hsa-mir-100	chr11	-	5p	122152219	NA	flanking-3	NA	NA	21	C	T	-32.8	-32.8	level; isomiR_profile	Experiment_3; Experiment_4
TCGA-64-1678-01A-01T-0947-13	LUAD	MIR34A	hsa-mir-34a	chr1	-	5p	9151671	NA	flanking-3	NA	NA	22	C	T	-51	-48.9	level; isomiR_profile	Experiment_3; Experiment_4
TCGA-A6-6653-01A-11H-1773-13	COAD	MIR10B	hsa-mir-10b	chr2	+	5p	176150322	NA	flanking-5	NA	NA	-7	CTA	C	-45	-42.2	isomiR_profile	Experiment_4
TCGA-66-2789-01A-01T-0981-13	LUSC	MIR126	hsa-mir-126	chr9	+	both	136670610	COSN494120	flanking-5	NA	NA	-6	A	T	-40.3	-41.3	isomiR_profile	Experiment_4
TCGA-D3-A8GC-06A-11R-A37G-13	SKCM	MIR134	hsa-mir-134	chr14	+	5p	101054683	NA	flanking-5	NA	NA	-11	C	T	-42.1	-42.3	isomiR_profile	Experiment_4
TCGA-56-7823-01B-11H-2246-13	LUSC	MIR135B	hsa-mir-135b	chr1	-	5p	205448347	NA	loop	NA	14	NA	G	GT	-54.4	-54	isomiR_profile	Experiment_4
TCGA-GS-A9TT-01A-11R-A38N-13	DLBC	MIR142	hsa-mir-142	chr17	-	both	58331234	NA	flanking-3	NA	NA	11	C	T	-44.9	-41.6	isomiR_profile	Experiment_4
TCGA-78-7155-01A-11H-2038-13	LUAD	MIR196B	hsa-mir-196b	chr7	-	5p	27169485	NA	flanking-3	NA	NA	8	G	A	-36.2	-34.2	isomiR_profile	Experiment_4
TCGA-BT-A0YX-01A-11R-A10V-13	BLCA	MIR205	hsa-mir-205	chr1	+	5p	209432226	COSN8407113	flanking-3	NA	NA	3	G	C	-46.7	-40.5	isomiR_profile	Experiment_4
TCGA-UY-A9PD-01A-11R-A38M-13	BLCA	MIR205	hsa-mir-205	chr1	+	5p	209432162	NA	flanking-5	NA	NA	-4	C	T	-46.7	-44	isomiR_profile	Experiment_4
TCGA-FA-A6HN-01A-11R-A31S-13	DLBC	MIR21	hsa-mir-21	chr17	+	5p	59841260	NA	flanking-5	NA	NA	-13	C	G	-44.7	-40.2	isomiR_profile	Experiment_4
TCGA-AA-3864-01A-01T-1021-13	COAD	MIR223	hsa-mir-223	chrX	+	3p	66018886	NA	flanking-5	NA	NA	-9	G	A	-47.6	-41	isomiR_profile	Experiment_4
TCGA-66-2754-01A-01T-0981-13	LUSC	MIR223	hsa-mir-223	chrX	+	3p	66018930	COSM757840	loop	NA	14	NA	G	A	-47.6	-47.6	isomiR_profile	Experiment_4
TCGA-D3-A8GN-06A-11R-A37G-13	SKCM	MIR29A	hsa-mir-29a	chr7	-	3p	130876738	NA	flanking-3	NA	NA	10	C	T	-35.6	-33	isomiR_profile	Experiment_4
TCGA-BA-4076-01A-01T-1435-13	HNSC	MIR30A	hsa-mir-30a	chr6	-	5p	71403620	NA	flanking-5	NA	NA	-4	G	C	-47.1	-44.1	isomiR_profile	Experiment_4
TCGA-37-3792-01A-01T-0981-13	LUSC	MIR32	hsa-mir-32	chr9	-	5p	109046214	NA	flanking-3	NA	NA	17	T	A	-48.9	-48	isomiR_profile	Experiment_4
TCGA-66-2795-01A-02T-0981-13	LUSC	MIR320A	hsa-mir-320a	chr8	-	3p	22244987	COSN2378943	non-seed duplex_3p	10	NA	NA	C	T	-57.9	-53.9	isomiR_profile	Experiment_4
TCGA-KN-8434-01A-11R-2314-13	KICH	MIR363	hsa-mir-363	chrX	-	3p	134169420	NA	loop	NA	5	NA	C	A	-35.6	-36.7	isomiR_profile	Experiment_4
TCGA-GN-A26C-01A-11R-A18W-13	SKCM	MIR379	hsa-mir-379	chr14	+	5p	101022098	NA	loop	NA	7	NA	G	A	-37.8	-37.8	isomiR_profile	Experiment_4
TCGA-B6-A0RE-01A-11R-A057-13	BRCA	MIR409	hsa-mir-409	chr14	+	both	101065337	COSN23014474	loop	NA	1	NA	C	G	-40.5	-40.4	isomiR_profile	Experiment_4
TCGA-2Y-A9H0-01A-11R-A38M-13	LIHC	MIR425	hsa-mir-425	chr3	-	5p	49020234	NA	flanking-5	NA	NA	-13	C	G	-39.3	-33.83	isomiR_profile	Experiment_4
TCGA-EY-A2OP-01A-11R-A19V-13	UCEC	MIR452	hsa-mir-452	chrX	-	5p	151959720	NA	flanking-5	NA	NA	-21	A	C	-44.1	-43.9	isomiR_profile	Experiment_4
TCGA-13-1477-01A-01R-1565-13	OV	MIR505	hsa-mir-505	chrX	-	3p	139924228	NA	flanking-5	NA	NA	-11	C	T	-48.9	-42.63	isomiR_profile	Experiment_4
TCGA-EE-A3J7-06A-11R-A20E-13	SKCM	MIR505	hsa-mir-505	chrX	-	3p	139924139	NA	flanking-3	NA	NA	21	G	A	-48.9	-48.9	isomiR_profile	Experiment_4
TCGA-AJ-A2QO-01A-11R-A18L-13	UCEC	MIR542	hsa-mir-542	chrX	-	3p	134541389	NA	loop	NA	11	NA	G	A	-41.2	-44.1	isomiR_profile	Experiment_4
TCGA-05-4415-01A-22H-1857-13	LUAD	MIR664A	hsa-mir-664a	chr1	-	both	220200531	NA	flanking-3	NA	NA	18	T	C	-29	-29	isomiR_profile	Experiment_4
TCGA-B6-A0RT-01A-21R-A085-13	BRCA	MIRLET7C	hsa-let-7c	chr21	+	5p	16539919	NA	flanking-3	NA	NA	15	A	C	-48	-47.6	isomiR_profile	Experiment_4
TCGA-B5-A11G-01A-13R-A119-13	UCEC	MIRLET7D	hsa-let-7d	chr9	+	5p	94178817	NA	flanking-5	NA	NA	-24	GA	G	-50.1	-50.1	isomiR_profile	Experiment_4
TCGA-XU-A930-01A-11R-A42W-13	THYM	MIR205	hsa-mir-205	chr1	+	5p	209432227	NA	flanking-3	NA	NA	4	A	AGG	-46.7	-50.9	strand_balance	Experiment_5
TCGA-LN-A9FP-01A-31R-A38E-13	ESCA	MIR409	hsa-mir-409	chr14	+	both	101065302	NA	flanking-5	NA	NA	-12	G	T	-40.5	-37.3	strand_balance	Experiment_5
TCGA-BT-A0YX-01A-11R-A10V-13	BLCA	MIR520A	hsa-mir-520a	chr19	+	both	53690923	COSN2376740	loop	NA	8	NA	G	C	-51	-51	strand_balance	Experiment_5
TCGA-EJ-7781-01A-11R-2117-13	PRAD	MIR100	hsa-mir-100	chr11	-	5p	122152219	NA	flanking-3	NA	NA	21	C	T	-32.8	-32.8	NA	NA
TCGA-D1-A16Y-01A-31R-A12H-13	UCEC	MIR100	hsa-mir-100	chr11	-	5p	122152232	NA	flanking-3	NA	NA	8	A	G	-32.8	-34.6	NA	NA
TCGA-G4-6628-01A-11H-1838-13	COAD	MIR100	hsa-mir-100	chr11	-	5p	122152215	NA	flanking-3	NA	NA	25	G	T	-32.8	-32.8	NA	NA
TCGA-BG-A0VZ-01A-11R-A108-13	UCEC	MIR100	hsa-mir-100	chr11	-	5p	122152265	COSN2381375	loop	NA	10	NA	G	T	-32.8	-32.8	NA	NA
TCGA-ZM-AA0E-01A-12R-A43A-13	TGCT	MIR10394	hsa-mir-10394	chr19	+	both	58393399	NA	loop	NA	12	NA	G	T	-44.3	-41.9	NA	NA
TCGA-BR-8363-01A-11R-2343-13	STAD	MIR10394	hsa-mir-10394	chr19	+	both	58393453	NA	flanking-3	NA	NA	7	C	T	-44.3	-44.3	NA	NA
TCGA-JX-A3Q0-01A-11R-A21U-13	CESC	MIR10394	hsa-mir-10394	chr19	+	both	58393391	NA	loop	NA	4	NA	C	G	-44.3	-47	NA	NA
TCGA-CG-5728-01A-11R-1602-13	STAD	MIR10394	hsa-mir-10394	chr19	+	both	58393453	NA	flanking-3	NA	NA	7	C	T	-44.3	-44.3	NA	NA
TCGA-EC-A24G-01A-11R-A16E-13	UCEC	MIR10394	hsa-mir-10394	chr19	+	both	58393405	NA	loop	NA	18	NA	G	A	-44.3	-42.2	NA	NA
TCGA-G2-A2EO-01A-11R-A17X-13	BLCA	MIR10395	hsa-mir-10395	chr19	-	3p	12703667	NA	flanking-5	NA	NA	-3	G	C	-35.2	-34.7	NA	NA
TCGA-AX-A1CA-01A-12R-A136-13	UCEC	MIR10397	hsa-mir-10397	chr5	+	both	10402401	NA	loop	NA	16	NA	G	T	-24.3	-25.4	NA	NA
TCGA-GC-A6I1-01A-12R-A31R-13	BLCA	MIR10397	hsa-mir-10397	chr5	+	both	10402396	NA	loop	NA	11	NA	C	G	-24.3	-24.3	NA	NA
TCGA-97-7937-01A-11H-2169-13	LUAD	MIR10397	hsa-mir-10397	chr5	+	both	10402389	NA	loop	NA	4	NA	G	T	-24.3	-25.3	NA	NA
TCGA-BR-8483-01A-31R-2402-13	STAD	MIR10397	hsa-mir-10397	chr5	+	both	10402389	COSM1059332	loop	NA	4	NA	G	A	-24.3	-22.2	NA	NA
TCGA-B5-A0JS-01A-11R-A103-13	UCEC	MIR106A	hsa-mir-106a	chrX	-	5p	134170270	COSN2383038	flanking-5	NA	NA	-4	T	G	-38.8	-36.9	NA	NA
TCGA-44-A4SU-01A-11H-A24S-13	LUAD	MIR106A	hsa-mir-106a	chrX	-	5p	134170272	NA	flanking-5	NA	NA	-6	G	A	-38.8	-41.2	NA	NA
TCGA-05-4244-01A-01T-1108-13	LUAD	MIR106A	hsa-mir-106a	chrX	-	5p	134170287	NA	flanking-5	NA	NA	-21	T	C	-38.8	-39	NA	NA
TCGA-Y8-A896-01A-11R-A36A-13	KIRP	MIR106A	hsa-mir-106a	chrX	-	5p	134170284	NA	flanking-5	NA	NA	-18	T	A	-38.8	-37.8	NA	NA
TCGA-39-5019-01A-01T-1819-13	LUSC	MIR106B	hsa-mir-106b	chr7	-	5p	100094036	COSN493976	loop	NA	7	NA	G	A	-54.5	-54.5	NA	NA
TCGA-EB-A4IS-01A-21R-A25Z-13	SKCM	MIR106B	hsa-mir-106b	chr7	-	5p	100093979	NA	flanking-3	NA	NA	23	G	A	-54.5	-54.5	NA	NA
TCGA-VQ-AA64-01A-11R-A415-13	STAD	MIR106B	hsa-mir-106b	chr7	-	5p	100094069	NA	flanking-5	NA	NA	-6	G	A	-54.5	-59.1	NA	NA
TCGA-LN-A49L-01A-11R-A24L-13	ESCA	MIR106B	hsa-mir-106b	chr7	-	5p	100094029	NA	loop	NA	14	NA	C	T	-54.5	-55.7	NA	NA
TCGA-VQ-A924-01A-11R-A415-13	STAD	MIR106B	hsa-mir-106b	chr7	-	5p	100094026	NA	loop	NA	17	NA	G	A	-54.5	-54.2	NA	NA
TCGA-DX-A48J-01A-21R-A30J-13	SARC	MIR106B	hsa-mir-106b	chr7	-	5p	100093982	NA	flanking-3	NA	NA	20	G	A	-54.5	-53	NA	NA
TCGA-51-4080-01A-01T-1557-13	LUSC	MIR10A	hsa-mir-10a	chr17	-	5p	48579940	NA	flanking-5	NA	NA	-14	G	C	-32.4	-35	NA	NA
TCGA-D1-A3DH-01A-11R-A19V-13	UCEC	MIR10B	hsa-mir-10b	chr2	+	5p	176150317	NA	flanking-5	NA	NA	-12	G	A	-45	-45.4	NA	NA
TCGA-70-6723-01A-11H-1819-13	LUSC	MIR10B	hsa-mir-10b	chr2	+	5p	176150376	COSN2378653	non-seed duplex_3p	9	NA	NA	G	A	-45	-41.6	NA	NA
TCGA-L7-A6VZ-01A-12R-A337-13	ESCA	MIR10B	hsa-mir-10b	chr2	+	5p	176150413	NA	flanking-3	NA	NA	24	C	T	-45	-45	NA	NA
TCGA-A6-2674-01A-02T-0822-13_GRCh37-lite	COAD	MIR10B	hsa-mir-10b	chr2	+	5p	176150360	NA	loop	NA	9	NA	G	A	-45	-44.7	NA	NA
TCGA-YG-AA3N-01A-11R-A38N-13	SKCM	MIR10B	hsa-mir-10b	chr2	+	5p	176150359	COSN1082676	loop	NA	8	NA	C	T	-45	-45	NA	NA
TCGA-HF-A5NB-01A-11R-A31Q-13	STAD	MIR10B	hsa-mir-10b	chr2	+	5p	176150413	NA	flanking-3	NA	NA	24	C	T	-45	-45	NA	NA
TCGA-CC-A7IF-01A-11R-A33A-13	LIHC	MIR122	hsa-mir-122	chr18	+	5p	58451084	COSN16303070	flanking-5	NA	NA	-4	G	A	-46.5	-40.1	NA	NA
TCGA-MI-A75G-01A-11R-A32J-13	LIHC	MIR1224	hsa-mir-1224	chr3	+	5p	184241400	COSM4940041	flanking-5	NA	NA	-5	C	G	-53.7	-56.2	NA	NA
TCGA-AA-3492-01A-01T-1409-13	COAD	MIR1224	hsa-mir-1224	chr3	+	5p	184241398	NA	flanking-5	NA	NA	-7	G	GC	-53.7	-54.3	NA	NA
TCGA-BF-A3DM-01A-11R-A20E-13	SKCM	MIR1226	hsa-mir-1226	chr3	+	3p	47849594	NA	loop	NA	14	NA	C	T	-48	-45.4	NA	NA
TCGA-AD-6889-01A-11H-1927-13	COAD	MIR1227	hsa-mir-1227	chr19	-	3p	2234067	COSM5129164	non-seed duplex_3p	15	NA	NA	GA	G	-57.9	-54.3	NA	NA
TCGA-B9-4117-01A-02R-1350-13	KIRP	MIR1227	hsa-mir-1227	chr19	-	3p	2234039	NA	flanking-3	NA	NA	23	G	T	-57.9	-56.5	NA	NA
TCGA-E7-A5KE-01A-11R-A28I-13	BLCA	MIR1228	hsa-mir-1228	chr12	+	both	57194483	NA	flanking-5	NA	NA	-21	G	A	-57.6	-57.3	NA	NA
TCGA-34-2604-01A-01T-1557-13	LUSC	MIR1228	hsa-mir-1228	chr12	+	both	57194589	NA	flanking-3	NA	NA	15	C	T	-57.6	-60.3	NA	NA
TCGA-HU-A4GT-01A-21R-A252-13	STAD	MIR1228	hsa-mir-1228	chr12	+	both	57194533	NA	loop	NA	9	NA	T	A	-57.6	-59.65	NA	NA
TCGA-J9-A52C-01A-11R-A26Y-13	PRAD	MIR1228	hsa-mir-1228	chr12	+	both	57194586	NA	flanking-3	NA	NA	12	G	A	-57.6	-58	NA	NA
TCGA-50-5935-01A-11H-1754-13	LUAD	MIR1229	hsa-mir-1229	chr5	-	3p	179798254	NA	flanking-3	NA	NA	24	C	G	-52.2	-52.2	NA	NA
TCGA-NJ-A4YP-01A-11H-A263-13	LUAD	MIR1229	hsa-mir-1229	chr5	-	3p	179798254	NA	flanking-3	NA	NA	24	C	G	-52.2	-52.2	NA	NA
TCGA-G3-A7M9-01A-23R-A358-13	LIHC	MIR1229	hsa-mir-1229	chr5	-	3p	179798293	COSN16303113	seed_3p	8	NA	NA	G	A	-52.2	-51.1	NA	NA
TCGA-CC-A7IF-01A-11R-A33A-13	LIHC	MIR122B	hsa-mir-122b	chr18	-	5p	58451084	COSN16303070	flanking-3	NA	NA	3	G	A	-42.2	-39.8	NA	NA
TCGA-CK-5916-01A-11H-1652-13	COAD	MIR1237	hsa-mir-1237	chr11	+	both	64368675	NA	loop	NA	4	NA	A	T	-46.7	-46.7	NA	NA
TCGA-EY-A1GQ-01A-21R-A13R-13	UCEC	MIR1237	hsa-mir-1237	chr11	+	both	64368695	COSM1604960	non-seed duplex_3p	13	NA	NA	G	A	-46.7	-41.4	NA	NA
TCGA-BK-A13B-01A-51R-A22I-13	UCEC	MIR1237	hsa-mir-1237	chr11	+	both	64368629	NA	flanking-5	NA	NA	-22	TG	T	-46.7	-46.7	NA	NA
TCGA-55-7727-01A-11H-2169-13	LUAD	MIR1237	hsa-mir-1237	chr11	+	both	64368631	NA	flanking-5	NA	NA	-20	G	A	-46.7	-44.1	NA	NA
TCGA-BR-4370-01A-01R-1157-13	STAD	MIR1247	hsa-mir-1247	chr14	-	5p	101560306	NA	flanking-3	NA	NA	20	G	A	-45.4	-46.7	NA	NA
TCGA-93-8067-01A-11H-2286-13	LUAD	MIR1247	hsa-mir-1247	chr14	-	5p	101560306	NA	flanking-3	NA	NA	20	G	A	-45.4	-46.7	NA	NA
TCGA-B5-A11U-01A-11R-A119-13	UCEC	MIR1247	hsa-mir-1247	chr14	-	5p	101560365	COSN1080972	non-seed duplex_5p	19	NA	NA	G	A	-45.4	-43.2	NA	NA
TCGA-58-8391-01A-11H-2325-13	LUSC	MIR1247	hsa-mir-1247	chr14	-	5p	101560325	COSN1164334	flanking-3	NA	NA	1	C	A	-45.4	-39.6	NA	NA
TCGA-D1-A0ZO-01A-11R-A119-13	UCEC	MIR1249	hsa-mir-1249	chr22	-	3p	45200964	COSN24402057	non-seed duplex_3p	16	NA	NA	AG	A	-41.6	-42.8	NA	NA
TCGA-G4-6302-01A-11H-1722-13	COAD	MIR1249	hsa-mir-1249	chr22	-	3p	45200964	COSN24402057	non-seed duplex_3p	16	NA	NA	AG	A	-41.6	-42.8	NA	NA
TCGA-QG-A5Z2-01A-11H-A28I-13	COAD	MIR1249	hsa-mir-1249	chr22	-	3p	45200964	COSN24402057	non-seed duplex_3p	16	NA	NA	AG	A	-41.6	-42.8	NA	NA
TCGA-D1-A16F-01A-11R-A12H-13	UCEC	MIR1249	hsa-mir-1249	chr22	-	3p	45200964	COSN24402057	non-seed duplex_3p	16	NA	NA	AG	A	-41.6	-42.8	NA	NA
TCGA-KK-A59V-01A-11R-A29V-13	PRAD	MIR1249	hsa-mir-1249	chr22	-	3p	45200964	COSN24402057	non-seed duplex_3p	16	NA	NA	AG	A	-41.6	-42.8	NA	NA
TCGA-BR-4361-01A-01R-1157-13	STAD	MIR1249	hsa-mir-1249	chr22	-	3p	45200964	COSN24402057	non-seed duplex_3p	16	NA	NA	AG	A	-41.6	-42.8	NA	NA
TCGA-EY-A2OM-01A-11R-A18L-13	UCEC	MIR1249	hsa-mir-1249	chr22	-	3p	45200964	COSN24402057	non-seed duplex_3p	16	NA	NA	AG	A	-41.6	-42.8	NA	NA
TCGA-DF-A2KY-01A-21R-A214-13	UCEC	MIR1249	hsa-mir-1249	chr22	-	3p	45200964	COSN24402057	non-seed duplex_3p	16	NA	NA	AG	A	-41.6	-42.8	NA	NA
TCGA-EY-A1GK-01A-11R-A13R-13	UCEC	MIR1249	hsa-mir-1249	chr22	-	3p	45200964	COSN24402057	non-seed duplex_3p	16	NA	NA	AG	A	-41.6	-42.8	NA	NA
TCGA-BR-4363-01A-01R-1157-13	STAD	MIR1249	hsa-mir-1249	chr22	-	3p	45200964	COSN24402057	non-seed duplex_3p	16	NA	NA	AG	A	-41.6	-42.8	NA	NA
TCGA-CG-4465-01A-01R-1157-13	STAD	MIR1249	hsa-mir-1249	chr22	-	3p	45200964	COSN24402057	non-seed duplex_3p	16	NA	NA	AG	A	-41.6	-42.8	NA	NA
TCGA-EY-A2OP-01A-11R-A19V-13	UCEC	MIR1249	hsa-mir-1249	chr22	-	3p	45200964	COSN24402057	non-seed duplex_3p	16	NA	NA	AG	A	-41.6	-42.8	NA	NA
TCGA-AA-3864-01A-01T-1021-13	COAD	MIR1249	hsa-mir-1249	chr22	-	3p	45200936	NA	flanking-3	NA	NA	22	G	T	-41.6	-41.6	NA	NA
TCGA-BS-A0TJ-01A-11R-A103-13	UCEC	MIR1249	hsa-mir-1249	chr22	-	3p	45200964	COSN24402057	non-seed duplex_3p	16	NA	NA	AG	A	-41.6	-42.8	NA	NA
TCGA-TQ-A7RR-01A-21R-A34G-13	LGG	MIR1251	hsa-mir-1251	chr12	+	5p	97491936	NA	loop	NA	3	NA	T	C	-40.5	-40.4	NA	NA
TCGA-05-5425-01A-02T-1627-13	LUAD	MIR1251	hsa-mir-1251	chr12	+	5p	97491907	NA	flanking-5	NA	NA	-6	A	G	-40.5	-39.5	NA	NA
TCGA-V3-A9ZX-01A-11R-A40B-13	UVM	MIR125A	hsa-mir-125a	chr19	+	5p	51693260	NA	flanking-5	NA	NA	-8	T	A	-46.7	-52.6	NA	NA
TCGA-UU-A93S-01A-21R-A41G-13	BRCA	MIR125A	hsa-mir-125a	chr19	+	5p	51693330	NA	flanking-3	NA	NA	3	G	T	-46.7	-43.6	NA	NA
TCGA-B5-A0K6-01A-11R-A041-13	UCEC	MIR125A	hsa-mir-125a	chr19	+	5p	51693267	COSN2382193	flanking-5	NA	NA	-1	G	T	-46.7	-41.8	NA	NA
TCGA-BS-A0U8-01A-11R-A103-13	UCEC	MIR125A	hsa-mir-125a	chr19	+	5p	51693309	COSN2382192	seed_3p	4	NA	NA	G	T	-46.7	-39.6	NA	NA
TCGA-CQ-A4C7-01A-11R-A25B-13	HNSC	MIR126	hsa-mir-126	chr9	+	both	136670698	NA	flanking-3	NA	NA	24	A	G	-40.3	-40.3	NA	NA
TCGA-N5-A59E-01A-11R-A28Z-13	UCS	MIR126	hsa-mir-126	chr9	+	both	136670683	NA	flanking-3	NA	NA	9	G	C	-40.3	-39.6	NA	NA
TCGA-FD-A3SM-01A-11R-A22V-13	BLCA	MIR127	hsa-mir-127	chr14	+	3p	100883075	NA	flanking-3	NA	NA	19	C	G	-43.1	-43.2	NA	NA
TCGA-E2-A10C-01A-21R-A10I-13	BRCA	MIR127	hsa-mir-127	chr14	+	3p	100883069	NA	flanking-3	NA	NA	13	C	T	-43.1	-43.1	NA	NA
TCGA-EB-A3Y7-01A-11R-A23A-13	SKCM	MIR127	hsa-mir-127	chr14	+	3p	100883033	COSM3493808	loop	NA	11	NA	C	T	-43.1	-43.1	NA	NA
TCGA-EE-A29M-06A-11R-A18W-13	SKCM	MIR127	hsa-mir-127	chr14	+	3p	100883030	COSM3493807	loop	NA	8	NA	G	A	-43.1	-42.1	NA	NA
TCGA-D1-A176-01A-11R-A12H-13	UCEC	MIR1292	hsa-mir-1292	chr20	+	5p	2652764	NA	flanking-5	NA	NA	-15	C	G	-50.6	-47.2	NA	NA
TCGA-CC-A7IH-01A-11R-A33A-13	LIHC	MIR1292	hsa-mir-1292	chr20	+	5p	2652768	NA	flanking-5	NA	NA	-11	T	A	-50.6	-55.7	NA	NA
TCGA-HP-A5N0-01A-11R-A28Z-13	LIHC	MIR1295B	hsa-mir-1295b	chr1	+	3p	171101808	NA	flanking-3	NA	NA	10	T	G	-52	-52	NA	NA
TCGA-BS-A0UM-01A-11R-A103-13	UCEC	MIR1295B	hsa-mir-1295b	chr1	+	3p	171101766	COSN494912	loop	NA	7	NA	C	T	-52	-52.7	NA	NA
TCGA-BA-4078-01A-01T-1435-13	HNSC	MIR1295B	hsa-mir-1295b	chr1	+	3p	171101774	NA	loop	NA	15	NA	C	A	-52	-52	NA	NA
TCGA-GM-A2DO-01A-11R-A18L-13	BRCA	MIR1295B	hsa-mir-1295b	chr1	+	3p	171101807	NA	flanking-3	NA	NA	9	C	G	-52	-49.3	NA	NA
TCGA-VS-A9V1-01A-11R-A42V-13	CESC	MIR1296	hsa-mir-1296	chr10	-	5p	63372997	NA	loop	NA	15	NA	G	C	-52.7	-50.8	NA	NA
TCGA-EW-A1J5-01A-11R-A13P-13	BRCA	MIR1296	hsa-mir-1296	chr10	-	5p	63372979	COSN23013261	non-seed duplex_3p	12	NA	NA	G	A	-52.7	-52.7	NA	NA
TCGA-B1-A655-01A-11R-A31S-13	KIRP	MIR1296	hsa-mir-1296	chr10	-	5p	63373057	NA	flanking-5	NA	NA	-24	G	T	-52.7	-52.7	NA	NA
TCGA-94-A4VJ-01A-11H-A25B-13	LUSC	MIR1298	hsa-mir-1298	chrX	+	5p	114715240	NA	flanking-5	NA	NA	-10	G	A	-50.9	-51.3	NA	NA
TCGA-CG-4437-01A-01R-1802-13	STAD	MIR1301	hsa-mir-1301	chr2	-	3p	25328726	NA	flanking-5	NA	NA	-19	T	C	-53.5	-56.9	NA	NA
TCGA-EB-A431-01A-11R-A25Z-13	SKCM	MIR1306	hsa-mir-1306	chr22	+	both	20086146	NA	flanking-3	NA	NA	17	C	T	-36.4	-37.1	NA	NA
TCGA-93-A4JO-01A-21H-A24S-13	LUAD	MIR1306	hsa-mir-1306	chr22	+	both	20086069	NA	flanking-5	NA	NA	-3	C	T	-36.4	-36.6	NA	NA
TCGA-BR-8368-01A-11R-2343-13	STAD	MIR1306	hsa-mir-1306	chr22	+	both	20086114	COSM3939562	seed_3p	3	NA	NA	G	A	-36.4	-34.5	NA	NA
TCGA-B5-A11Y-01A-21R-A10I-13	UCEC	MIR1306	hsa-mir-1306	chr22	+	both	20086088	COSM1032175	non-seed duplex_5p	17	NA	NA	C	T	-36.4	-34.6	NA	NA
TCGA-ZN-A9VQ-01A-11R-A404-13	MESO	MIR1307	hsa-mir-1307	chr10	-	both	103394332	NA	loop	NA	9	NA	A	G	-40.8	-40.8	NA	NA
TCGA-LP-A7HU-01A-11R-A342-13	CESC	MIR1307	hsa-mir-1307	chr10	-	both	103394297	COSN16128613	flanking-3	NA	NA	4	C	T	-40.8	-40.8	NA	NA
TCGA-D1-A0ZS-01A-11R-A119-13	UCEC	MIR1307	hsa-mir-1307	chr10	-	both	103394290	NA	flanking-3	NA	NA	11	C	T	-40.8	-41.5	NA	NA
TCGA-AX-A2HJ-01A-11R-A17A-13	UCEC	MIR130A	hsa-mir-130a	chr11	+	3p	57641278	NA	flanking-3	NA	NA	5	C	T	-46.3	-46.2	NA	NA
TCGA-BG-A0YV-01A-11R-A10I-13	UCEC	MIR130A	hsa-mir-130a	chr11	+	3p	57641279	COSN2381402	flanking-3	NA	NA	6	G	A	-46.3	-46.9	NA	NA
TCGA-QG-A5Z1-01A-11H-A28I-13	COAD	MIR130B	hsa-mir-130b	chr22	+	3p	21653344	NA	loop	NA	8	NA	C	T	-47.3	-47.6	NA	NA
TCGA-DX-A6BE-01A-41R-A32L-13	SARC	MIR130B	hsa-mir-130b	chr22	+	3p	21653390	NA	flanking-3	NA	NA	15	C	T	-47.3	-45.6	NA	NA
TCGA-BA-6871-01A-11R-1872-13	HNSC	MIR134	hsa-mir-134	chr14	+	5p	101054677	NA	flanking-5	NA	NA	-17	C	G	-42.1	-44	NA	NA
TCGA-BS-A0TJ-01A-11R-A103-13	UCEC	MIR134	hsa-mir-134	chr14	+	5p	101054749	COSN2381582	non-seed duplex_3p	18	NA	NA	C	A	-42.1	-35.9	NA	NA
TCGA-KQ-A41R-01A-21R-A358-13	BLCA	MIR134	hsa-mir-134	chr14	+	5p	101054719	NA	loop	NA	4	NA	G	A	-42.1	-41.9	NA	NA
TCGA-22-4613-01A-01T-1442-13	LUSC	MIR134	hsa-mir-134	chr14	+	5p	101054684	NA	flanking-5	NA	NA	-10	G	A	-42.1	-41.8	NA	NA
TCGA-FS-A1ZZ-06A-11R-A18V-13	SKCM	MIR134	hsa-mir-134	chr14	+	5p	101054686	NA	flanking-5	NA	NA	-8	C	T	-42.1	-43.3	NA	NA
TCGA-56-A4BX-01A-11H-A24G-13	LUSC	MIR134	hsa-mir-134	chr14	+	5p	101054689	NA	flanking-5	NA	NA	-5	G	T	-42.1	-36.9	NA	NA
TCGA-22-5483-01A-01T-1819-13	LUSC	MIR135B	hsa-mir-135b	chr1	-	5p	205448386	NA	flanking-5	NA	NA	-3	C	T	-54.4	-47.8	NA	NA
TCGA-EE-A2GC-06A-11R-A18W-13	SKCM	MIR135B	hsa-mir-135b	chr1	-	5p	205448312	NA	flanking-3	NA	NA	11	C	T	-54.4	-53.6	NA	NA
TCGA-22-5478-01A-01T-1634-13	LUSC	MIR136	hsa-mir-136	chr14	+	both	100884795	NA	flanking-3	NA	NA	24	G	A	-49.8	-50.5	NA	NA
TCGA-85-8351-01A-11H-2295-13	LUSC	MIR136	hsa-mir-136	chr14	+	both	100884757	COSM1368268	seed_3p	8	NA	NA	G	A	-49.8	-50.5	NA	NA
TCGA-EB-A3Y6-01A-21R-A23A-13	SKCM	MIR136	hsa-mir-136	chr14	+	both	100884756	COSM3493816	seed_3p	7	NA	NA	C	A	-49.8	-45.9	NA	NA
TCGA-B0-5095-01A-01R-1419-13	KIRC	MIR136	hsa-mir-136	chr14	+	both	100884745	COSM469664	loop	NA	7	NA	T	C	-49.8	-49.8	NA	NA
TCGA-EE-A2GL-06A-11R-A18V-13	SKCM	MIR136	hsa-mir-136	chr14	+	both	100884791	NA	flanking-3	NA	NA	20	C	T	-49.8	-48.9	NA	NA
TCGA-AX-A3FS-01A-11R-A22I-13	UCEC	MIR136	hsa-mir-136	chr14	+	both	100884745	COSM469664	loop	NA	7	NA	T	C	-49.8	-49.8	NA	NA
TCGA-DA-A1HW-06A-11R-A18X-13	SKCM	MIR136	hsa-mir-136	chr14	+	both	100884710	COSM1707888	flanking-5	NA	NA	-6	C	T	-49.8	-48	NA	NA
TCGA-R6-A6Y2-01B-11R-A337-13	ESCA	MIR137	hsa-mir-137	chr1	-	3p	98046073	NA	flanking-3	NA	NA	18	C	T	-51.1	-49.6	NA	NA
TCGA-AX-A3FT-01A-11R-A22I-13	UCEC	MIR139	hsa-mir-139	chr11	-	5p	72615044	NA	flanking-3	NA	NA	22	G	A	-51.4	-52.7	NA	NA
TCGA-AM-5821-01A-01T-1652-13	COAD	MIR139	hsa-mir-139	chr11	-	5p	72615096	COSN18276733	loop	NA	6	NA	A	G	-51.4	-51.4	NA	NA
TCGA-AA-A01R-01A-21R-A082-13	COAD	MIR139	hsa-mir-139	chr11	-	5p	72615081	COSN18246415	seed_3p	8	NA	NA	C	T	-51.4	-51.8	NA	NA
TCGA-P4-AAVL-01A-11R-A42U-13	KIRP	MIR140	hsa-mir-140	chr16	+	3p	69933178	NA	flanking-3	NA	NA	16	A	AC	-55	-55	NA	NA
TCGA-CQ-6225-01A-11R-1914-13	HNSC	MIR140	hsa-mir-140	chr16	+	3p	69933129	NA	loop	NA	5	NA	C	T	-55	-54.9	NA	NA
TCGA-D8-A1JG-01B-11R-A13P-13	BRCA	MIR140	hsa-mir-140	chr16	+	3p	69933099	COSN23014990	flanking-5	NA	NA	-4	C	T	-55	-52.3	NA	NA
TCGA-AA-3833-01A-01T-0906-13	COAD	MIR140	hsa-mir-140	chr16	+	3p	69933129	NA	loop	NA	5	NA	C	T	-55	-54.9	NA	NA
TCGA-Q1-A73O-01A-11R-A32K-13	CESC	MIR141	hsa-mir-141	chr12	+	3p	6964154	COSN16129757	loop	NA	20	NA	C	G	-55.2	-52.9	NA	NA
TCGA-BD-A3ER-01A-11R-A214-13	LIHC	MIR141	hsa-mir-141	chr12	+	3p	6964106	NA	flanking-5	NA	NA	-7	C	G	-55.2	-53	NA	NA
TCGA-FF-8041-01A-11R-2212-13	DLBC	MIR142	hsa-mir-142	chr17	-	both	58331260	COSN4769864	seed_3p	8	NA	NA	A	G	-44.9	-47.3	NA	NA
TCGA-AB-2805-03A-01T-0734-13	LAML	MIR142	hsa-mir-142	chr17	-	both	58331261	COSN4710472	seed_3p	7	NA	NA	C	G	-44.9	-41	NA	NA
TCGA-FF-A7CW-01A-11R-A38N-13	DLBC	MIR142	hsa-mir-142	chr17	-	both	58331239	NA	flanking-3	NA	NA	6	C	T	-44.9	-36.5	NA	NA
TCGA-DK-A1AC-01A-11R-A13X-13	BLCA	MIR142	hsa-mir-142	chr17	-	both	58331272	COSN513890	loop	NA	11	NA	C	T	-44.9	-44.2	NA	NA
TCGA-55-8205-01A-11H-2240-13	LUAD	MIR143	hsa-mir-143	chr5	+	3p	149428971	NA	loop	NA	6	NA	G	T	-51.4	-51.4	NA	NA
TCGA-D1-A174-01A-11R-A12H-13	UCEC	MIR143	hsa-mir-143	chr5	+	3p	149428924	NA	flanking-5	NA	NA	-20	C	A	-51.4	-55.5	NA	NA
TCGA-OR-A5J5-01A-11R-A29W-13	ACC	MIR144	hsa-mir-144	chr17	-	both	28861543	NA	flanking-3	NA	NA	5	G	A	-48.2	-48.2	NA	NA
TCGA-D3-A3C3-06A-12R-A18V-13	SKCM	MIR144	hsa-mir-144	chr17	-	both	28861615	NA	flanking-5	NA	NA	-11	C	T	-48.2	-44.8	NA	NA
TCGA-XF-A9T8-01A-11R-A39B-13	BLCA	MIR144	hsa-mir-144	chr17	-	both	28861531	NA	flanking-3	NA	NA	17	C	A	-48.2	-48.2	NA	NA
TCGA-60-2703-01A-11H-2044-13	LUSC	MIR145	hsa-mir-145	chr5	+	5p	149430694	NA	loop	NA	11	NA	G	C	-45.1	-45.6	NA	NA
TCGA-AP-A0LS-01A-11R-A14C-13	UCEC	MIR1468	hsa-mir-1468	chrX	-	5p	63786098	NA	flanking-5	NA	NA	-23	TC	T	-33.9	-33.9	NA	NA
TCGA-FU-A3HZ-01A-11R-A214-13	CESC	MIR1468	hsa-mir-1468	chrX	-	5p	63786059	COSN16130470	non-seed duplex_5p	17	NA	NA	G	A	-33.9	-38	NA	NA
TCGA-AD-6548-01A-11H-1838-13	COAD	MIR1468	hsa-mir-1468	chrX	-	5p	63785992	NA	flanking-3	NA	NA	20	G	A	-33.9	-33.9	NA	NA
TCGA-D5-6928-01A-11H-1927-13	COAD	MIR146A	hsa-mir-146a	chr5	+	5p	160485354	NA	flanking-5	NA	NA	-18	G	A	-40.8	-38.7	NA	NA
TCGA-DX-A8BR-01A-11R-A41D-13	SARC	MIR146A	hsa-mir-146a	chr5	+	5p	160485446	NA	flanking-3	NA	NA	17	A	C	-40.8	-40.6	NA	NA
TCGA-CS-5390-01A-02R-1469-13	LGG	MIR146A	hsa-mir-146a	chr5	+	5p	160485429	COSN8635147	non-seed duplex_3p	22	NA	NA	G	C	-40.8	-35.6	NA	NA
TCGA-ZU-A8S4-01A-11R-A41D-13	CHOL	MIR147B	hsa-mir-147b	chr15	+	3p	45433051	NA	flanking-5	NA	NA	-10	A	G	-38.8	-38.3	NA	NA
TCGA-CV-5443-01A-01R-1513-13	HNSC	MIR148A	hsa-mir-148a	chr7	-	3p	25949998	NA	flanking-5	NA	NA	-17	C	T	-40.9	-40.9	NA	NA
TCGA-G4-6586-01A-11H-1773-13	COAD	MIR148A	hsa-mir-148a	chr7	-	3p	25949904	NA	flanking-3	NA	NA	18	C	T	-40.9	-40.9	NA	NA
TCGA-HF-7133-01A-11R-2055-13	STAD	MIR148A	hsa-mir-148a	chr7	-	3p	25949900	NA	flanking-3	NA	NA	22	T	G	-40.9	-43.8	NA	NA
TCGA-04-1347-01A-01R-1564-13	OV	MIR148A	hsa-mir-148a	chr7	-	3p	25949900	NA	flanking-3	NA	NA	22	T	G	-40.9	-43.8	NA	NA
TCGA-CV-7427-01A-11R-2080-13	HNSC	MIR148B	hsa-mir-148b	chr12	+	3p	54337215	NA	flanking-5	NA	NA	-25	C	T	-36.6	-36.6	NA	NA
TCGA-AX-A3FT-01A-11R-A22I-13	UCEC	MIR148B	hsa-mir-148b	chr12	+	3p	54337228	NA	flanking-5	NA	NA	-12	G	T	-36.6	-31.94	NA	NA
TCGA-OR-A5KZ-01A-11R-A29W-13	ACC	MIR149	hsa-mir-149	chr2	+	5p	240456086	NA	flanking-3	NA	NA	10	T	C	-55.3	-57.5	NA	NA
TCGA-OR-A5K1-01A-11R-A29W-13	ACC	MIR149	hsa-mir-149	chr2	+	5p	240456086	NA	flanking-3	NA	NA	10	T	C	-55.3	-57.5	NA	NA
TCGA-BC-A3KF-01A-11R-A214-13	LIHC	MIR149	hsa-mir-149	chr2	+	5p	240456083	NA	flanking-3	NA	NA	7	A	G	-55.3	-55.3	NA	NA
TCGA-AA-3949-01A-01T-1021-13	COAD	MIR150	hsa-mir-150	chr19	-	5p	49500856	NA	flanking-5	NA	NA	-3	G	T	-62.9	-56.4	NA	NA
TCGA-ET-A25J-01A-11R-A16Q-13	THCA	MIR152	hsa-mir-152	chr17	-	3p	48037240	NA	flanking-5	NA	NA	-8	G	A	-50	-49.9	NA	NA
TCGA-D5-6928-01A-11H-1927-13	COAD	MIR1537	hsa-mir-1537	chr1	-	3p	235853069	NA	flanking-5	NA	NA	-11	C	T	-48.6	-41.5	NA	NA
TCGA-60-2713-01A-01T-1557-13	LUSC	MIR154	hsa-mir-154	chr14	+	both	101059752	NA	flanking-5	NA	NA	-17	C	G	-41.6	-46.5	NA	NA
TCGA-RP-A694-06A-11R-A310-13	SKCM	MIR154	hsa-mir-154	chr14	+	both	101059830	NA	flanking-3	NA	NA	4	C	T	-41.6	-41.6	NA	NA
TCGA-E2-A150-01A-11R-A12C-13	BRCA	MIR154	hsa-mir-154	chr14	+	both	101059759	NA	flanking-5	NA	NA	-10	T	C	-41.6	-37	NA	NA
TCGA-VQ-A94O-01A-11R-A415-13	STAD	MIR155	hsa-mir-155	chr21	+	5p	25574065	NA	flanking-3	NA	NA	22	C	A	-46.7	-42.7	NA	NA
TCGA-DK-A1A3-01A-11R-A13X-13	BLCA	MIR155	hsa-mir-155	chr21	+	5p	25574025	COSN2376761	seed_3p	4	NA	NA	C	T	-46.7	-44	NA	NA
TCGA-18-5595-01A-01T-1634-13	LUSC	MIR155	hsa-mir-155	chr21	+	5p	25573966	NA	flanking-5	NA	NA	-17	C	T	-46.7	-49.4	NA	NA
TCGA-ZB-A966-01A-11R-A42U-13	THYM	MIR15A	hsa-mir-15a	chr13	-	5p	50049206	NA	flanking-5	NA	NA	-18	AT	A	-31.7	-31.7	NA	NA
TCGA-A6-6653-01A-11H-1773-13	COAD	MIR15A	hsa-mir-15a	chr13	-	5p	50049206	NA	flanking-5	NA	NA	-18	A	AT	-31.7	-31.7	NA	NA
TCGA-AX-A05S-01A-11R-A00W-13	UCEC	MIR15A	hsa-mir-15a	chr13	-	5p	50049206	NA	flanking-5	NA	NA	-18	AT	A	-31.7	-31.7	NA	NA
TCGA-F4-6856-01A-11H-1927-13	COAD	MIR15A	hsa-mir-15a	chr13	-	5p	50049206	NA	flanking-5	NA	NA	-18	A	AT	-31.7	-31.7	NA	NA
TCGA-A6-3809-01A-01T-1021-13	COAD	MIR15A	hsa-mir-15a	chr13	-	5p	50049206	NA	flanking-5	NA	NA	-18	AT	A	-31.7	-31.7	NA	NA
TCGA-66-2791-01A-01T-0981-13	LUSC	MIR15B	hsa-mir-15b	chr3	+	5p	160404673	NA	flanking-3	NA	NA	7	T	C	-30.7	-26.8	NA	NA
TCGA-A2-A0SU-01A-11R-A085-13	BRCA	MIR15B	hsa-mir-15b	chr3	+	5p	160404598	NA	flanking-5	NA	NA	-9	A	T	-30.7	-28.8	NA	NA
TCGA-CM-5341-01A-01T-1409-13	COAD	MIR17	hsa-mir-17	chr13	+	5p	91350688	NA	flanking-3	NA	NA	12	C	G	-36.2	-35.4	NA	NA
TCGA-G4-6588-01A-11H-1773-13	COAD	MIR17	hsa-mir-17	chr13	+	5p	91350602	NA	flanking-5	NA	NA	-16	CCA	C	-36.2	-36.3	NA	NA
TCGA-D8-A1XK-01A-21R-A14L-13	BRCA	MIR181C	hsa-mir-181c	chr19	+	5p	13874754	COSN23015345	loop	NA	8	NA	G	A	-44.6	-45.1	NA	NA
TCGA-39-5036-01A-01T-1442-13	LUSC	MIR181D	hsa-mir-181d	chr19	+	5p	13874992	NA	flanking-3	NA	NA	19	G	T	-46.2	-45.6	NA	NA
TCGA-ZN-A9VQ-01A-11R-A404-13	MESO	MIR182	hsa-mir-182	chr7	-	5p	129770387	NA	flanking-3	NA	NA	19	C	T	-51.3	-52	NA	NA
TCGA-EO-A3AU-01A-21R-A19V-13	UCEC	MIR182	hsa-mir-182	chr7	-	5p	129770491	NA	flanking-5	NA	NA	-21	TC	T	-51.3	-49.1	NA	NA
TCGA-93-8067-01A-11H-2286-13	LUAD	MIR182	hsa-mir-182	chr7	-	5p	129770392	NA	flanking-3	NA	NA	14	G	A	-51.3	-52	NA	NA
TCGA-AA-A01R-01A-21R-A082-13	COAD	MIR182	hsa-mir-182	chr7	-	5p	129770388	NA	flanking-3	NA	NA	18	G	A	-51.3	-51.3	NA	NA
TCGA-EE-A3J5-06A-11R-A20E-13	SKCM	MIR182	hsa-mir-182	chr7	-	5p	129770412	COSN5029509	non-seed duplex_3p	15	NA	NA	G	A	-51.3	-48.6	NA	NA
TCGA-XF-A9SM-01A-11R-A42V-13	BLCA	MIR185	hsa-mir-185	chr22	+	5p	20033213	NA	flanking-3	NA	NA	4	C	T	-57.8	-56.1	NA	NA
TCGA-H9-7775-01A-11R-2117-13	PRAD	MIR185	hsa-mir-185	chr22	+	5p	20033226	NA	flanking-3	NA	NA	17	C	G	-57.8	-55.8	NA	NA
TCGA-D8-A1JB-01A-11R-A13P-13	BRCA	MIR185	hsa-mir-185	chr22	+	5p	20033224	NA	flanking-3	NA	NA	15	A	T	-57.8	-59.6	NA	NA
TCGA-D1-A17T-01A-11R-A12H-13	UCEC	MIR185	hsa-mir-185	chr22	+	5p	20033146	NA	flanking-5	NA	NA	-7	G	T	-57.8	-54.3	NA	NA
TCGA-AA-3492-01A-01T-1409-13	COAD	MIR186	hsa-mir-186	chr1	-	5p	71067644	COSN18162915	non-seed duplex_3p	20	NA	NA	CA	C	-41.2	-37	NA	NA
TCGA-B5-A0JR-01A-13R-A041-13	UCEC	MIR188	hsa-mir-188	chrX	+	5p	50003580	COSN503233	flanking-3	NA	NA	4	T	C	-39.7	-39.5	NA	NA
TCGA-XF-AAMX-01A-11R-A42V-13	BLCA	MIR188	hsa-mir-188	chrX	+	5p	50003590	NA	flanking-3	NA	NA	14	C	T	-39.7	-39.7	NA	NA
TCGA-55-8506-01A-11H-2402-13	LUAD	MIR188	hsa-mir-188	chrX	+	5p	50003579	NA	flanking-3	NA	NA	3	A	T	-39.7	-38.9	NA	NA
TCGA-CN-6011-01A-11R-1685-13	HNSC	MIR188	hsa-mir-188	chrX	+	5p	50003511	NA	flanking-5	NA	NA	-6	C	G	-39.7	-42.1	NA	NA
TCGA-MV-A51V-01A-11R-A26X-13	BLCA	MIR18A	hsa-mir-18a	chr13	+	5p	91350741	NA	flanking-5	NA	NA	-15	G	C	-30.7	-31.9	NA	NA
TCGA-E5-A2PC-01A-11R-A205-13	BLCA	MIR18A	hsa-mir-18a	chr13	+	5p	91350745	NA	flanking-5	NA	NA	-11	G	T	-30.7	-30.1	NA	NA
TCGA-A6-2686-01A-01T-1409-13	COAD	MIR190A	hsa-mir-190a	chr15	+	5p	62824049	NA	flanking-3	NA	NA	21	CG	C	-33.5	-35.4	NA	NA
TCGA-D8-A27G-01A-11R-A16E-13	BRCA	MIR190B	hsa-mir-190b	chr1	-	5p	154193702	COSN23013920	loop	NA	10	NA	C	T	-43.7	-43.3	NA	NA
TCGA-AR-A256-01A-11R-A168-13	BRCA	MIR190B	hsa-mir-190b	chr1	-	5p	154193664	NA	flanking-3	NA	NA	12	C	T	-43.7	-38.2	NA	NA
TCGA-DD-AACM-01A-11R-A41H-13	LIHC	MIR191	hsa-mir-191	chr3	-	5p	49020611	NA	flanking-3	NA	NA	20	G	T	-50.9	-50.9	NA	NA
TCGA-AX-A1C5-01A-11R-A136-13	UCEC	MIR191	hsa-mir-191	chr3	-	5p	49020612	NA	flanking-3	NA	NA	19	C	T	-50.9	-50.9	NA	NA
TCGA-UT-A88E-01B-11R-A404-13	MESO	MIR191	hsa-mir-191	chr3	-	5p	49020659	NA	loop	NA	13	NA	G	A	-50.9	-50.9	NA	NA
TCGA-BS-A0UA-01A-11R-A119-13	UCEC	MIR1911	hsa-mir-1911	chrX	+	5p	114763217	COSN1084971	non-seed duplex_5p	23	NA	NA	G	A	-36.6	-34.1	NA	NA
TCGA-B1-A656-01A-11R-A31S-13	KIRP	MIR1911	hsa-mir-1911	chrX	+	5p	114763257	COSN1084970	flanking-3	NA	NA	6	C	T	-36.6	-40.9	NA	NA
TCGA-ZJ-AAXB-01A-11R-A42V-13	CESC	MIR1914	hsa-mir-1914	chr20	-	3p	63941539	NA	flanking-5	NA	NA	-7	C	T	-45	-42.7	NA	NA
TCGA-A3-3387-01A-01R-1540-13	KIRC	MIR192	hsa-mir-192	chr11	-	5p	64891164	COSN2377058	non-seed duplex_3p	17	NA	NA	A	G	-39.15	-36	NA	NA
TCGA-D1-A1NZ-01A-21R-A14C-13	UCEC	MIR192	hsa-mir-192	chr11	-	5p	64891144	NA	flanking-3	NA	NA	15	T	C	-39.15	-39.8	NA	NA
TCGA-KL-8326-01A-11R-2314-13	KICH	MIR193B	hsa-mir-193b	chr16	+	3p	14303955	NA	flanking-5	NA	NA	-25	C	CT	-46.9	-48.5	NA	NA
TCGA-ER-A19H-06A-12R-A18V-13	SKCM	MIR193B	hsa-mir-193b	chr16	+	3p	14303982	COSN5027646	seed_5p	3	NA	NA	G	A	-46.9	-40.3	NA	NA
TCGA-AN-A0XW-01A-11R-A108-13	BRCA	MIR193B	hsa-mir-193b	chr16	+	3p	14303989	COSN23014894	non-seed duplex_5p	10	NA	NA	G	C	-46.9	-40.7	NA	NA
TCGA-64-5779-01A-01T-1627-13	LUAD	MIR196B	hsa-mir-196b	chr7	-	5p	27169521	COSN24409123	loop	NA	7	NA	G	T	-36.2	-36.2	NA	NA
TCGA-YG-AA3O-06A-11R-A38N-13	SKCM	MIR196B	hsa-mir-196b	chr7	-	5p	27169565	NA	flanking-5	NA	NA	-16	C	T	-36.2	-36.1	NA	NA
TCGA-ET-A3DS-01A-11R-A19N-13	THCA	MIR196B	hsa-mir-196b	chr7	-	5p	27169566	NA	flanking-5	NA	NA	-17	T	A	-36.2	-36.2	NA	NA
TCGA-AJ-A8CV-01A-11R-A37P-13	UCEC	MIR197	hsa-mir-197	chr1	+	3p	109598937	NA	loop	NA	14	NA	C	T	-50.3	-47.7	NA	NA
TCGA-DK-A1AB-01A-11R-A13X-13	BLCA	MIR197	hsa-mir-197	chr1	+	3p	109598984	NA	flanking-3	NA	NA	23	C	T	-50.3	-50.3	NA	NA
TCGA-A4-7828-01A-11R-2138-13	KIRP	MIR19A	hsa-mir-19a	chr13	+	3p	91350980	NA	flanking-3	NA	NA	19	T	G	-40.3	-40.3	NA	NA
TCGA-G3-A25T-01A-11R-A16S-13	LIHC	MIR200A	hsa-mir-200a	chr1	+	3p	1167904	COSN16303208	loop	NA	5	NA	C	G	-49.6	-49.5	NA	NA
TCGA-R6-A6XG-01B-11R-A337-13	ESCA	MIR200A	hsa-mir-200a	chr1	+	3p	1167908	NA	loop	NA	9	NA	C	T	-49.6	-48.8	NA	NA
TCGA-G2-A3IE-01A-11R-A20E-13	BLCA	MIR200A	hsa-mir-200a	chr1	+	3p	1167903	COSN513603	loop	NA	4	NA	C	T	-49.6	-50.2	NA	NA
TCGA-ED-A459-01A-11R-A25Z-13	LIHC	MIR200A	hsa-mir-200a	chr1	+	3p	1167893	COSN16303181	non-seed duplex_5p	16	NA	NA	T	A	-49.6	-49.5	NA	NA
TCGA-DX-A48J-01A-21R-A30J-13	SARC	MIR200A	hsa-mir-200a	chr1	+	3p	1167869	NA	flanking-5	NA	NA	-9	C	T	-49.6	-50.3	NA	NA
TCGA-2G-AAG3-01A-11R-A439-13	TGCT	MIR200C	hsa-mir-200c	chr12	+	3p	6963698	NA	flanking-5	NA	NA	-5	G	A	-61.8	-54.7	NA	NA
TCGA-EE-A2MD-06A-11R-A18W-13	SKCM	MIR204	hsa-mir-204	chr9	-	5p	70810071	NA	flanking-5	NA	NA	-19	G	A	-41.2	-41.2	NA	NA
TCGA-D1-A16Y-01A-31R-A12H-13	UCEC	MIR204	hsa-mir-204	chr9	-	5p	70810072	NA	flanking-5	NA	NA	-20	A	C	-41.2	-45.7	NA	NA
TCGA-VQ-AA6G-01A-11R-A415-13	STAD	MIR204	hsa-mir-204	chr9	-	5p	70810058	COSN19154078	flanking-5	NA	NA	-6	C	T	-41.2	-40.1	NA	NA
TCGA-97-7554-01A-11H-2038-13	LUAD	MIR204	hsa-mir-204	chr9	-	5p	70809988	NA	flanking-3	NA	NA	5	A	AG	-41.2	-40.5	NA	NA
TCGA-B6-A40B-01A-11R-A23A-13	BRCA	MIR204	hsa-mir-204	chr9	-	5p	70809983	NA	flanking-3	NA	NA	10	T	A	-41.2	-39.3	NA	NA
TCGA-D5-6931-01A-11H-1927-13	COAD	MIR204	hsa-mir-204	chr9	-	5p	70809989	NA	flanking-3	NA	NA	4	T	G	-41.2	-43.8	NA	NA
TCGA-44-3918-01A-01T-1108-13	LUAD	MIR204	hsa-mir-204	chr9	-	5p	70809978	NA	flanking-3	NA	NA	15	A	G	-41.2	-40.6	NA	NA
TCGA-CN-6988-01A-11R-1914-13	HNSC	MIR204	hsa-mir-204	chr9	-	5p	70810069	NA	flanking-5	NA	NA	-17	A	T	-41.2	-41.2	NA	NA
TCGA-FU-A2QG-01A-11R-A18L-13	CESC	MIR205	hsa-mir-205	chr1	+	5p	209432167	COSN2378349	seed_5p	2	NA	NA	C	T	-46.7	-46.5	NA	NA
TCGA-VR-A8EW-01A-11R-A36E-13	ESCA	MIR205	hsa-mir-205	chr1	+	5p	209432147	NA	flanking-5	NA	NA	-19	AAT	A	-46.7	-47.1	NA	NA
TCGA-18-5595-01A-01T-1634-13	LUSC	MIR205	hsa-mir-205	chr1	+	5p	209432167	COSN2378349	seed_5p	2	NA	NA	C	T	-46.7	-46.5	NA	NA
TCGA-W3-A825-06A-11R-A358-13	SKCM	MIR205	hsa-mir-205	chr1	+	5p	209432208	COSN5026360	seed_3p	6	NA	NA	C	T	-46.7	-46.5	NA	NA
TCGA-EE-A2GI-06A-11R-A18W-13	SKCM	MIR205	hsa-mir-205	chr1	+	5p	209432167	COSN2378349	seed_5p	2	NA	NA	C	T	-46.7	-46.5	NA	NA
TCGA-EE-A2GM-06B-11R-A18V-13	SKCM	MIR205	hsa-mir-205	chr1	+	5p	209432197	NA	loop	NA	10	NA	C	T	-46.7	-46.7	NA	NA
TCGA-CM-4746-01A-01T-1409-13	COAD	MIR205	hsa-mir-205	chr1	+	5p	209432200	NA	loop	NA	13	NA	C	T	-46.7	-47.2	NA	NA
TCGA-D3-A2JF-06A-11R-A18V-13	SKCM	MIR205	hsa-mir-205	chr1	+	5p	209432208	COSN5026360	seed_3p	6	NA	NA	C	T	-46.7	-46.5	NA	NA
TCGA-YG-AA3N-01A-11R-A38N-13	SKCM	MIR208B	hsa-mir-208b	chr14	-	3p	23417972	NA	flanking-3	NA	NA	25	C	T	-34.8	-34.8	NA	NA
TCGA-BL-A3JM-01A-12R-A21E-13	BLCA	MIR20A	hsa-mir-20a	chr13	+	5p	91351118	COSN513764	non-seed duplex_3p	11	NA	NA	G	C	-42	-38	NA	NA
TCGA-DD-AAE7-01A-11R-A41H-13	LIHC	MIR20A	hsa-mir-20a	chr13	+	5p	91351103	NA	loop	NA	9	NA	T	C	-42	-43.5	NA	NA
TCGA-ZF-AA56-01A-31R-A39B-13	BLCA	MIR20A	hsa-mir-20a	chr13	+	5p	91351142	NA	flanking-3	NA	NA	13	T	C	-42	-41.3	NA	NA
TCGA-24-1104-01A-01R-1565-13	OV	MIR20A	hsa-mir-20a	chr13	+	5p	91351097	NA	loop	NA	3	NA	T	C	-42	-41.8	NA	NA
TCGA-B5-A0KB-01B-11R-A14C-13	UCEC	MIR20B	hsa-mir-20b	chrX	-	5p	134169795	NA	flanking-3	NA	NA	18	A	G	-41	-41	NA	NA
TCGA-QF-A5YS-01A-11R-A31S-13	UCEC	MIR20B	hsa-mir-20b	chrX	-	5p	134169794	NA	flanking-3	NA	NA	19	G	T	-41	-41.7	NA	NA
TCGA-99-7458-01A-11H-2038-13	LUAD	MIR20B	hsa-mir-20b	chrX	-	5p	134169852	COSN24411804	non-seed duplex_5p	21	NA	NA	A	T	-41	-41	NA	NA
TCGA-04-1346-01A-01R-1569-13	OV	MIR20B	hsa-mir-20b	chrX	-	5p	134169834	COSN158473	non-seed duplex_3p	1	NA	NA	T	C	-41	-39.9	NA	NA
TCGA-VS-A959-01A-11R-A42V-13	CESC	MIR21	hsa-mir-21	chr17	+	5p	59841322	COSN8603510	non-seed duplex_3p	12	NA	NA	G	A	-44.7	-40.8	NA	NA
TCGA-BT-A42F-01A-11R-A23X-13	BLCA	MIR21	hsa-mir-21	chr17	+	5p	59841300	NA	loop	NA	6	NA	G	C	-44.7	-44.4	NA	NA
TCGA-CV-6942-01A-21R-2015-13	HNSC	MIR21	hsa-mir-21	chr17	+	5p	59841249	NA	flanking-5	NA	NA	-24	C	G	-44.7	-44.7	NA	NA
TCGA-XF-AAN3-01A-11R-A42V-13	BLCA	MIR21	hsa-mir-21	chr17	+	5p	59841300	NA	loop	NA	6	NA	G	A	-44.7	-44.4	NA	NA
TCGA-98-A538-01A-11H-A263-13	LUSC	MIR21	hsa-mir-21	chr17	+	5p	59841267	NA	flanking-5	NA	NA	-6	G	T	-44.7	-39.2	NA	NA
TCGA-BH-A0BW-01A-11R-A114-13	BRCA	MIR211	hsa-mir-211	chr15	-	5p	31065089	COSN23014797	loop	NA	6	NA	A	G	-44.6	-43.9	NA	NA
TCGA-FV-A495-01A-11R-A25Z-13	LIHC	MIR211	hsa-mir-211	chr15	-	5p	31065098	COSN16303058	non-seed duplex_5p	19	NA	NA	C	A	-44.6	-42.4	NA	NA
TCGA-D3-A8GL-06A-11R-A37G-13	SKCM	MIR214	hsa-mir-214	chr1	-	3p	172138795	NA	flanking-3	NA	NA	21	T	G	-67.6	-67.6	NA	NA
TCGA-EE-A29L-06A-12R-A18V-13	SKCM	MIR215	hsa-mir-215	chr1	-	5p	220117958	NA	flanking-5	NA	NA	-22	A	G	-33.4	-33.4	NA	NA
TCGA-39-5011-01A-01T-1442-13	LUSC	MIR216A	hsa-mir-216a	chr2	-	5p	55988967	NA	flanking-3	NA	NA	14	T	C	-42.8	-43.1	NA	NA
TCGA-HF-7136-01A-11R-2055-13	STAD	MIR217	hsa-mir-217	chr2	-	5p	55982979	NA	flanking-3	NA	NA	5	C	A	-31.3	-31.8	NA	NA
TCGA-37-3783-01A-01T-1517-13	LUSC	MIR217	hsa-mir-217	chr2	-	5p	55983043	COSN2378661	flanking-5	NA	NA	-1	T	C	-31.3	-38.2	NA	NA
TCGA-EB-A5UN-06A-11R-A310-13	SKCM	MIR217	hsa-mir-217	chr2	-	5p	55983012	NA	loop	NA	8	NA	G	A	-31.3	-31.3	NA	NA
TCGA-DG-A2KK-01A-11R-A17X-13	CESC	MIR219B	hsa-mir-219b	chr9	+	both	128392702	COSN16128927	flanking-3	NA	NA	4	G	A	-43.4	-43.4	NA	NA
TCGA-AU-6004-01A-11H-1722-13	COAD	MIR219B	hsa-mir-219b	chr9	+	both	128392662	NA	loop	NA	7	NA	C	T	-43.4	-42.9	NA	NA
TCGA-CM-6679-01A-11H-1838-13	COAD	MIR22	hsa-mir-22	chr17	-	3p	1713945	NA	loop	NA	7	NA	C	G	-46.3	-46.3	NA	NA
TCGA-CJ-4912-01A-01R-1425-13	KIRC	MIR22	hsa-mir-22	chr17	-	3p	1713912	COSN2377436	flanking-3	NA	NA	2	C	A	-46.3	-41	NA	NA
TCGA-FA-A86F-01A-11R-A38N-13	DLBC	MIR221	hsa-mir-221	chrX	-	3p	45746162	NA	flanking-3	NA	NA	18	C	T	-47.2	-43.6	NA	NA
TCGA-3C-AALK-01A-11R-A41G-13	BRCA	MIR221	hsa-mir-221	chrX	-	3p	45746225	COSN5776032	non-seed duplex_5p	18	NA	NA	C	A	-47.2	-44	NA	NA
TCGA-BH-A5IZ-01A-11R-A27U-13	BRCA	MIR221	hsa-mir-221	chrX	-	3p	45746169	NA	flanking-3	NA	NA	11	C	T	-47.2	-42.5	NA	NA
TCGA-C5-A2LT-01A-11R-A18L-13	CESC	MIR222	hsa-mir-222	chrX	-	3p	45747065	COSN2377957	loop	NA	8	NA	C	T	-48.9	-48.9	NA	NA
TCGA-MA-AA42-01A-12R-A38M-13	CESC	MIR222	hsa-mir-222	chrX	-	3p	45747066	NA	loop	NA	7	NA	G	A	-48.9	-48.9	NA	NA
TCGA-B0-5096-01A-01R-1419-13	KIRC	MIR222	hsa-mir-222	chrX	-	3p	45747065	COSN2377957	loop	NA	8	NA	C	T	-48.9	-48.9	NA	NA
TCGA-CV-6955-01A-11R-2015-13	HNSC	MIR222	hsa-mir-222	chrX	-	3p	45747065	COSN2377957	loop	NA	8	NA	C	T	-48.9	-48.9	NA	NA
TCGA-C8-A26Y-01A-11R-A16E-13	BRCA	MIR222	hsa-mir-222	chrX	-	3p	45747060	COSN23017634	loop	NA	13	NA	G	A	-48.9	-47.8	NA	NA
TCGA-NC-A5HR-01A-21H-A26V-13	LUSC	MIR223	hsa-mir-223	chrX	+	3p	66018971	NA	flanking-3	NA	NA	13	G	T	-47.6	-43	NA	NA
TCGA-2G-AAGZ-01A-11R-A439-13	TGCT	MIR223	hsa-mir-223	chrX	+	3p	66018968	NA	flanking-3	NA	NA	10	C	G	-47.6	-44.8	NA	NA
TCGA-D9-A3Z4-01A-11R-A23A-13	SKCM	MIR223	hsa-mir-223	chrX	+	3p	66018915	COSM3562771	non-seed duplex_5p	21	NA	NA	T	C	-47.6	-48.8	NA	NA
TCGA-DI-A2QU-01A-11R-A18L-13	UCEC	MIR223	hsa-mir-223	chrX	+	3p	66018892	NA	flanking-5	NA	NA	-3	C	A	-47.6	-43.7	NA	NA
TCGA-GK-A6C7-01A-11R-A33A-13	KIRC	MIR224	hsa-mir-224	chrX	-	5p	151958656	NA	flanking-5	NA	NA	-4	C	A	-47.4	-40.3	NA	NA
TCGA-BG-A187-01A-11R-A12H-13	UCEC	MIR224	hsa-mir-224	chrX	-	5p	151958598	COSN4710444	non-seed duplex_3p	9	NA	NA	C	A	-47.4	-46.5	NA	NA
TCGA-B5-A0KB-01B-11R-A14C-13	UCEC	MIR2277	hsa-mir-2277	chr5	-	5p	93620705	NA	flanking-3	NA	NA	5	C	G	-55.3	-59.6	NA	NA
TCGA-EY-A1GO-01A-11R-A14C-13	UCEC	MIR2355	hsa-mir-2355	chr2	-	both	207110087	NA	flanking-5	NA	NA	-24	C	G	-36.4	-36.4	NA	NA
TCGA-LN-A5U5-01A-21R-A28K-13	ESCA	MIR2355	hsa-mir-2355	chr2	-	both	207109983	NA	flanking-3	NA	NA	16	T	A	-36.4	-37.1	NA	NA
TCGA-DX-A23Y-01A-11R-A27U-13	SARC	MIR2355	hsa-mir-2355	chr2	-	both	207109977	NA	flanking-3	NA	NA	22	G	A	-36.4	-38.3	NA	NA
TCGA-D8-A1XQ-01A-11R-A14L-13	BRCA	MIR23A	hsa-mir-23a	chr19	-	3p	13836590	COSN23015344	flanking-3	NA	NA	5	C	T	-38.3	-34.8	NA	NA
TCGA-22-1012-01A-01T-1557-13	LUSC	MIR23A	hsa-mir-23a	chr19	-	3p	13836586	NA	flanking-3	NA	NA	9	G	C	-38.3	-44	NA	NA
TCGA-EY-A548-01A-11R-A27R-13	UCEC	MIR23A	hsa-mir-23a	chr19	-	3p	13836674	NA	flanking-5	NA	NA	-23	AG	A	-38.3	-38.3	NA	NA
TCGA-BC-A10X-01A-11R-A130-13	LIHC	MIR23B	hsa-mir-23b	chr9	+	3p	95085214	NA	flanking-5	NA	NA	-13	T	TGC	-39.8	-41.5	NA	NA
TCGA-A2-A0CR-01A-11R-A22I-13	BRCA	MIR23B	hsa-mir-23b	chr9	+	3p	95085309	NA	flanking-3	NA	NA	22	C	T	-39.8	-39.8	NA	NA
TCGA-L5-A4OU-01A-11R-A28K-13	ESCA	MIR25	hsa-mir-25	chr7	-	3p	100093647	NA	flanking-5	NA	NA	-17	C	T	-45.3	-41.4	NA	NA
TCGA-W3-A825-06A-11R-A358-13	SKCM	MIR25	hsa-mir-25	chr7	-	3p	100093565	NA	flanking-3	NA	NA	6	G	A	-45.3	-47.1	NA	NA
TCGA-EW-A1PC-01B-11R-A21U-13	BRCA	MIR25	hsa-mir-25	chr7	-	3p	100093640	NA	flanking-5	NA	NA	-10	G	T	-45.3	-44.9	NA	NA
TCGA-AX-A1C5-01A-11R-A136-13	UCEC	MIR25	hsa-mir-25	chr7	-	3p	100093626	COSN19728907	seed_5p	5	NA	NA	C	T	-45.3	-46	NA	NA
TCGA-04-1361-01A-01R-1565-13	OV	MIR25	hsa-mir-25	chr7	-	3p	100093637	NA	flanking-5	NA	NA	-7	A	T	-45.3	-40.7	NA	NA
TCGA-24-0975-01A-02R-1565-13	OV	MIR25	hsa-mir-25	chr7	-	3p	100093602	NA	loop	NA	8	NA	G	A	-45.3	-43	NA	NA
TCGA-XD-AAUG-01A-61R-A41G-13	PAAD	MIR27A	hsa-mir-27a	chr19	-	3p	13836478	NA	loop	NA	9	NA	T	C	-53	-53	NA	NA
TCGA-AJ-A8CW-01A-11R-A37P-13	UCEC	MIR27A	hsa-mir-27a	chr19	-	3p	13836441	NA	flanking-3	NA	NA	6	TG	T	-53	-45.9	NA	NA
TCGA-AB-2935-03A-01T-0740-13	LAML	MIR27A	hsa-mir-27a	chr19	-	3p	13836478	NA	loop	NA	9	NA	T	C	-53	-53	NA	NA
TCGA-S9-A6TU-01A-12R-A360-13	LGG	MIR27A	hsa-mir-27a	chr19	-	3p	13836513	NA	flanking-5	NA	NA	-5	C	T	-53	-48	NA	NA
TCGA-B5-A1MW-01A-11R-A17A-13	UCEC	MIR27A	hsa-mir-27a	chr19	-	3p	13836523	NA	flanking-5	NA	NA	-15	G	A	-53	-53.7	NA	NA
TCGA-BR-8360-01A-11R-2343-13	STAD	MIR27A	hsa-mir-27a	chr19	-	3p	13836441	NA	flanking-3	NA	NA	6	TG	T	-53	-45.9	NA	NA
TCGA-AB-2840-03A-01T-0734-13	LAML	MIR27A	hsa-mir-27a	chr19	-	3p	13836478	NA	loop	NA	9	NA	T	C	-53	-53	NA	NA
TCGA-EE-A2M5-06A-12R-A18V-13	SKCM	MIR296	hsa-mir-296	chr20	-	both	58817682	COSN5028281	flanking-5	NA	NA	-1	C	T	-46.6	-42.7	NA	NA
TCGA-DM-A0XF-01A-11H-A154-13	COAD	MIR299	hsa-mir-299	chr14	+	5p	101023809	COSN24388943	non-seed duplex_5p	10	NA	NA	G	A	-48.4	-48.8	NA	NA
TCGA-69-7980-01A-11H-2186-13	LUAD	MIR299	hsa-mir-299	chr14	+	5p	101023835	COSN24410136	seed_3p	4	NA	NA	G	T	-48.4	-42.4	NA	NA
TCGA-A6-2685-01A-01T-1409-13	COAD	MIR299	hsa-mir-299	chr14	+	5p	101023809	COSN24388943	non-seed duplex_5p	10	NA	NA	G	A	-48.4	-48.8	NA	NA
TCGA-94-8490-01A-11H-2325-13	LUSC	MIR299	hsa-mir-299	chr14	+	5p	101023865	NA	flanking-3	NA	NA	12	G	T	-48.4	-48.6	NA	NA
TCGA-BR-8360-01A-11R-2343-13	STAD	MIR299	hsa-mir-299	chr14	+	5p	101023809	COSN24388943	non-seed duplex_5p	10	NA	NA	G	A	-48.4	-48.8	NA	NA
TCGA-22-4609-01A-21H-2124-13	LUSC	MIR29A	hsa-mir-29a	chr7	-	3p	130876745	NA	flanking-3	NA	NA	3	T	C	-35.6	-35.6	NA	NA
TCGA-AA-3492-01A-01T-1409-13	COAD	MIR29A	hsa-mir-29a	chr7	-	3p	130876729	NA	flanking-3	NA	NA	19	T	C	-35.6	-35.1	NA	NA
TCGA-ER-A42L-06A-11R-A24Y-13	SKCM	MIR29A	hsa-mir-29a	chr7	-	3p	130876820	NA	flanking-5	NA	NA	-13	G	A	-35.6	-34.2	NA	NA
TCGA-BT-A3PH-01A-11R-A222-13	BLCA	MIR29A	hsa-mir-29a	chr7	-	3p	130876827	NA	flanking-5	NA	NA	-20	G	C	-35.6	-38.5	NA	NA
TCGA-PK-A5HB-01A-11R-A29W-13	ACC	MIR29C	hsa-mir-29c	chr1	-	3p	207801845	NA	flanking-3	NA	NA	20	C	T	-37.1	-37.1	NA	NA
TCGA-E9-A1RF-01A-11R-A156-13	BRCA	MIR301A	hsa-mir-301a	chr17	-	3p	59151212	COSN23015194	flanking-5	NA	NA	-4	C	T	-31.4	-32.1	NA	NA
TCGA-Q1-A6DW-01A-11R-A32K-13	CESC	MIR301A	hsa-mir-301a	chr17	-	3p	59151171	COSN16132402	non-seed duplex_3p	1	NA	NA	G	A	-31.4	-35.9	NA	NA
TCGA-L4-A4E5-01A-11H-A24S-13	LUAD	MIR301A	hsa-mir-301a	chr17	-	3p	59151127	NA	flanking-3	NA	NA	22	G	T	-31.4	-31.4	NA	NA
TCGA-EE-A2MR-06A-11R-A18V-13	SKCM	MIR3064	hsa-mir-3064	chr17	-	both	64500812	NA	loop	NA	5	NA	G	A	-29.8	-29.8	NA	NA
TCGA-QK-A8Z9-01B-11R-A39B-13	HNSC	MIR3064	hsa-mir-3064	chr17	-	both	64500860	NA	flanking-5	NA	NA	-23	T	C	-29.8	-29.5	NA	NA
TCGA-A4-A5Y0-01A-11R-A31S-13	KIRP	MIR3065	hsa-mir-3065	chr17	+	5p	81125863	NA	flanking-5	NA	NA	-23	C	G	-53.7	-51.3	NA	NA
TCGA-CV-7568-01A-11R-2231-13	HNSC	MIR30A	hsa-mir-30a	chr6	-	5p	71403578	NA	loop	NA	17	NA	C	T	-47.1	-47.1	NA	NA
TCGA-DM-A0XF-01A-11H-A154-13	COAD	MIR30A	hsa-mir-30a	chr6	-	5p	71403581	NA	loop	NA	14	NA	C	T	-47.1	-47.1	NA	NA
TCGA-AD-6889-01A-11H-1927-13	COAD	MIR30A	hsa-mir-30a	chr6	-	5p	71403531	NA	flanking-3	NA	NA	23	C	A	-47.1	-49.2	NA	NA
TCGA-D8-A27V-01A-12R-A17A-13	BRCA	MIR30B	hsa-mir-30b	chr8	-	5p	134800551	COSN23017168	seed_3p	3	NA	NA	C	T	-37.6	-33.7	NA	NA
TCGA-66-2780-01A-01T-1557-13	LUSC	MIR30B	hsa-mir-30b	chr8	-	5p	134800559	NA	loop	NA	11	NA	C	G	-37.6	-38	NA	NA
TCGA-64-5781-01A-01T-1627-13	LUAD	MIR30D	hsa-mir-30d	chr8	-	5p	134804916	COSN24409198	loop	NA	3	NA	C	A	-36.5	-37.1	NA	NA
TCGA-MV-A51V-01A-11R-A26X-13	BLCA	MIR30D	hsa-mir-30d	chr8	-	5p	134804855	NA	flanking-3	NA	NA	24	G	C	-36.5	-36.7	NA	NA
TCGA-CK-5916-01A-11H-1652-13	COAD	MIR30D	hsa-mir-30d	chr8	-	5p	134804874	NA	flanking-3	NA	NA	5	C	T	-36.5	-34	NA	NA
TCGA-D6-A6EO-01A-11R-A31R-13	HNSC	MIR30E	hsa-mir-30e	chr1	+	5p	40754408	NA	loop	NA	16	NA	A	T	-54	-55.5	NA	NA
TCGA-67-3771-01A-01T-0947-13	LUAD	MIR30E	hsa-mir-30e	chr1	+	5p	40754357	NA	flanking-5	NA	NA	-14	G	A	-54	-49.9	NA	NA
TCGA-BR-4201-01A-01R-1131-13	STAD	MIR30E	hsa-mir-30e	chr1	+	5p	40754448	NA	flanking-3	NA	NA	14	G	A	-54	-54.7	NA	NA
TCGA-86-7711-01A-11H-2065-13	LUAD	MIR31	hsa-mir-31	chr9	-	5p	21512109	NA	flanking-3	NA	NA	12	C	T	-44.4	-44.9	NA	NA
TCGA-FR-A3YN-06A-11R-A23A-13	SKCM	MIR31	hsa-mir-31	chr9	-	5p	21512116	COSN5030232	flanking-3	NA	NA	5	G	A	-44.4	-41.5	NA	NA
TCGA-E2-A9RU-01A-11R-A41G-13	BRCA	MIR3117	hsa-mir-3117	chr1	+	3p	66628528	NA	flanking-3	NA	NA	23	A	T	-37.3	-34	NA	NA
TCGA-JW-A852-01A-11R-A358-13	CESC	MIR3140	hsa-mir-3140	chr4	-	3p	152489381	COSN16128399	loop	NA	4	NA	A	G	-47.4	-45.3	NA	NA
TCGA-SL-A6JA-01A-11R-A31S-13	UCEC	MIR3145	hsa-mir-3145	chr6	-	3p	138435304	NA	flanking-5	NA	NA	-21	AT	A	-50.1	-45.5	NA	NA
TCGA-3B-A9HR-01A-11R-A38N-13	SARC	MIR3187	hsa-mir-3187	chr19	+	3p	813569	NA	flanking-5	NA	NA	-21	G	A	-59	-59	NA	NA
TCGA-EY-A1GR-01A-11R-A13R-13	UCEC	MIR3190	hsa-mir-3190	chr19	+	3p	47227020	NA	flanking-3	NA	NA	10	G	T	-64.9	-64.9	NA	NA
TCGA-IR-A3LH-01A-21R-A214-13	CESC	MIR3192	hsa-mir-3192	chr20	+	5p	18470613	NA	flanking-5	NA	NA	-11	G	C	-36.4	-34.3	NA	NA
TCGA-D1-A17M-01A-21R-A12H-13	UCEC	MIR32	hsa-mir-32	chr9	-	5p	109046215	NA	flanking-3	NA	NA	16	G	A	-48.9	-46.9	NA	NA
TCGA-BT-A20N-01A-11R-A14X-13	BLCA	MIR320A	hsa-mir-320a	chr8	-	3p	22245021	COSN2376802	seed_5p	8	NA	NA	G	A	-57.9	-57.1	NA	NA
TCGA-21-1079-01A-01T-1557-13	LUSC	MIR320A	hsa-mir-320a	chr8	-	3p	22245034	NA	flanking-5	NA	NA	-6	G	A	-57.9	-57.5	NA	NA
TCGA-4Z-AA7M-01A-11R-A39B-13	BLCA	MIR320A	hsa-mir-320a	chr8	-	3p	22245004	NA	loop	NA	3	NA	C	T	-57.9	-58.8	NA	NA
TCGA-VS-A959-01A-11R-A42V-13	CESC	MIR320A	hsa-mir-320a	chr8	-	3p	22244961	NA	flanking-3	NA	NA	14	C	T	-57.9	-53.8	NA	NA
TCGA-D8-A1JE-01A-11R-A13P-13	BRCA	MIR320A	hsa-mir-320a	chr8	-	3p	22245044	NA	flanking-5	NA	NA	-16	G	T	-57.9	-57.9	NA	NA
TCGA-D1-A15X-01A-11R-A119-13	UCEC	MIR320A	hsa-mir-320a	chr8	-	3p	22244960	NA	flanking-3	NA	NA	15	T	C	-57.9	-57.9	NA	NA
TCGA-AA-3663-01A-01T-1722-13	COAD	MIR320A	hsa-mir-320a	chr8	-	3p	22244970	COSN23013034	flanking-3	NA	NA	5	CT	C	-57.9	-55	NA	NA
TCGA-CU-A0YO-01A-11R-A10V-13	BLCA	MIR323A	hsa-mir-323a	chr14	+	3p	101025781	COSN2376693	loop	NA	13	NA	G	A	-38.7	-35	NA	NA
TCGA-A6-4105-01A-02T-1773-13	COAD	MIR323A	hsa-mir-323a	chr14	+	3p	101025767	COSN1080997	non-seed duplex_5p	21	NA	NA	G	A	-38.7	-35.1	NA	NA
TCGA-B5-A11J-01A-11R-A119-13	UCEC	MIR323A	hsa-mir-323a	chr14	+	3p	101025767	COSN1080997	non-seed duplex_5p	21	NA	NA	G	A	-38.7	-35.1	NA	NA
TCGA-ER-A19K-01A-21R-A18W-13	SKCM	MIR323B	hsa-mir-323b	chr14	+	3p	101056227	COSN5026513	flanking-5	NA	NA	-6	G	A	-45.5	-40.7	NA	NA
TCGA-FS-A1Z3-06A-11R-A18W-13	SKCM	MIR323B	hsa-mir-323b	chr14	+	3p	101056217	NA	flanking-5	NA	NA	-16	C	T	-45.5	-45.5	NA	NA
TCGA-BR-4370-01A-01R-1157-13	STAD	MIR323B	hsa-mir-323b	chr14	+	3p	101056294	COSN19659616	flanking-3	NA	NA	4	G	A	-45.5	-44	NA	NA
TCGA-D8-A1XZ-01A-11R-A14L-13	BRCA	MIR323B	hsa-mir-323b	chr14	+	3p	101056226	NA	flanking-5	NA	NA	-7	C	T	-45.5	-43.3	NA	NA
TCGA-33-AAS8-01A-11H-A404-13	LUSC	MIR323B	hsa-mir-323b	chr14	+	3p	101056230	NA	flanking-5	NA	NA	-3	G	T	-45.5	-42.7	NA	NA
TCGA-D3-A8GL-06A-11R-A37G-13	SKCM	MIR323B	hsa-mir-323b	chr14	+	3p	101056293	COSN5026514	flanking-3	NA	NA	3	C	T	-45.5	-43.5	NA	NA
TCGA-UB-A7MB-01A-11R-A343-13	LIHC	MIR323B	hsa-mir-323b	chr14	+	3p	101056305	NA	flanking-3	NA	NA	15	T	C	-45.5	-45.5	NA	NA
TCGA-AP-A5FX-01A-11R-A27R-13	UCEC	MIR324	hsa-mir-324	chr17	-	both	7223295	NA	flanking-3	NA	NA	13	C	T	-42.6	-42.6	NA	NA
TCGA-A5-A0GW-01A-11R-A041-13	UCEC	MIR324	hsa-mir-324	chr17	-	both	7223290	NA	flanking-3	NA	NA	18	C	T	-42.6	-43.3	NA	NA
TCGA-D3-A3C8-06A-12R-A18V-13	SKCM	MIR328	hsa-mir-328	chr16	-	3p	67202413	NA	flanking-5	NA	NA	-24	G	A	-60.2	-60.2	NA	NA
TCGA-ZF-A9RC-01A-11R-A38M-13	BLCA	MIR328	hsa-mir-328	chr16	-	3p	67202402	NA	flanking-5	NA	NA	-13	G	C	-60.2	-63.3	NA	NA
TCGA-B4-5844-01A-11R-1671-13	KIRC	MIR328	hsa-mir-328	chr16	-	3p	67202381	COSN525546	non-seed duplex_5p	9	NA	NA	T	C	-60.2	-59.5	NA	NA
TCGA-O2-A52Q-01A-11H-A26V-13	LUSC	MIR328	hsa-mir-328	chr16	-	3p	67202402	NA	flanking-5	NA	NA	-13	G	C	-60.2	-63.3	NA	NA
TCGA-F4-6570-01A-11H-1773-13	COAD	MIR328	hsa-mir-328	chr16	-	3p	67202382	COSN23012614	seed_5p	8	NA	NA	GC	G	-60.2	-60.3	NA	NA
TCGA-CG-5717-01A-11R-1602-13	STAD	MIR328	hsa-mir-328	chr16	-	3p	67202362	NA	loop	NA	5	NA	T	G	-60.2	-60.2	NA	NA
TCGA-BS-A0U8-01A-11R-A103-13	UCEC	MIR328	hsa-mir-328	chr16	-	3p	67202382	COSN23014987	seed_5p	8	NA	NA	G	GC	-60.2	-60.4	NA	NA
TCGA-BR-A4QL-01A-31R-A252-13	STAD	MIR328	hsa-mir-328	chr16	-	3p	67202382	COSN23014987	seed_5p	8	NA	NA	G	GC	-60.2	-60.4	NA	NA
TCGA-CD-8536-01A-11R-2343-13	STAD	MIR328	hsa-mir-328	chr16	-	3p	67202382	COSN23014987	seed_5p	8	NA	NA	G	GC	-60.2	-60.4	NA	NA
TCGA-K4-A54R-01A-11R-A26X-13	BLCA	MIR330	hsa-mir-330	chr19	-	3p	45638999	NA	flanking-3	NA	NA	10	G	A	-45.8	-47.5	NA	NA
TCGA-CV-7089-01A-11R-2015-13	HNSC	MIR330	hsa-mir-330	chr19	-	3p	45639012	COSN498826	non-seed duplex_3p	20	NA	NA	C	T	-45.8	-39.7	NA	NA
TCGA-DK-A3X1-01A-12R-A22V-13	BLCA	MIR330	hsa-mir-330	chr19	-	3p	45639038	NA	loop	NA	11	NA	G	A	-45.8	-45.8	NA	NA
TCGA-D1-A16J-01A-11R-A12H-13	UCEC	MIR330	hsa-mir-330	chr19	-	3p	45639012	COSN498826	non-seed duplex_3p	20	NA	NA	C	T	-45.8	-39.7	NA	NA
TCGA-MT-A67F-01A-11R-A30I-13	HNSC	MIR331	hsa-mir-331	chr12	+	3p	95308469	NA	loop	NA	3	NA	G	A	-46.1	-46.1	NA	NA
TCGA-DA-A95V-06A-11R-A37G-13	SKCM	MIR331	hsa-mir-331	chr12	+	3p	95308515	NA	flanking-3	NA	NA	15	C	T	-46.1	-46.4	NA	NA
TCGA-IH-A3EA-01A-11R-A20E-13	SKCM	MIR331	hsa-mir-331	chr12	+	3p	95308505	NA	flanking-3	NA	NA	5	C	T	-46.1	-43.5	NA	NA
TCGA-AX-A2IN-01A-12R-A17X-13	UCEC	MIR335	hsa-mir-335	chr7	+	5p	130496154	NA	loop	NA	6	NA	A	G	-42.5	-42.5	NA	NA
TCGA-D1-A17D-01A-12R-A12H-13	UCEC	MIR337	hsa-mir-337	chr14	+	both	100874505	NA	flanking-5	NA	NA	-10	TG	T	-44.8	-41.8	NA	NA
TCGA-G4-6628-01A-11H-1838-13	COAD	MIR337	hsa-mir-337	chr14	+	both	100874507	NA	flanking-5	NA	NA	-8	G	T	-44.8	-41.9	NA	NA
TCGA-EO-A22S-01A-11R-A18L-13	UCEC	MIR337	hsa-mir-337	chr14	+	both	100874505	NA	flanking-5	NA	NA	-10	TG	T	-44.8	-41.8	NA	NA
TCGA-A4-A5Y0-01A-11R-A31S-13	KIRP	MIR338	hsa-mir-338	chr17	-	both	81125863	NA	flanking-3	NA	NA	24	C	G	-50.2	-50.2	NA	NA
TCGA-AA-3864-01A-01T-1021-13	COAD	MIR33A	hsa-mir-33a	chr22	+	5p	41901029	NA	flanking-3	NA	NA	19	C	T	-57.3	-56.7	NA	NA
TCGA-D9-A4Z3-01A-11R-A25Z-13	SKCM	MIR33A	hsa-mir-33a	chr22	+	5p	41901021	NA	flanking-3	NA	NA	11	C	T	-57.3	-55.4	NA	NA
TCGA-AJ-A23N-01A-11R-A22I-13	UCEC	MIR340	hsa-mir-340	chr5	-	5p	180015400	NA	flanking-5	NA	NA	-18	G	A	-36	-37.3	NA	NA
TCGA-A6-6653-01A-11H-1773-13	COAD	MIR340	hsa-mir-340	chr5	-	5p	180015338	COSN20188985	seed_3p	3	NA	NA	G	A	-36	-36	NA	NA
TCGA-90-A4ED-01A-31H-A25B-13	LUSC	MIR342	hsa-mir-342	chr14	+	3p	100109708	NA	loop	NA	15	NA	G	A	-51.4	-51.3	NA	NA
TCGA-HZ-8636-01A-21R-2401-13	PAAD	MIR342	hsa-mir-342	chr14	+	3p	100109659	NA	flanking-5	NA	NA	-14	C	T	-51.4	-51.4	NA	NA
TCGA-FP-A4BE-01A-12R-A24L-13	STAD	MIR342	hsa-mir-342	chr14	+	3p	100109746	NA	flanking-3	NA	NA	9	C	T	-51.4	-48.7	NA	NA
TCGA-D8-A142-01A-11R-A114-13	BRCA	MIR342	hsa-mir-342	chr14	+	3p	100109710	COSN23014460	loop	NA	17	NA	A	G	-51.4	-51.3	NA	NA
TCGA-G4-6315-01A-11H-1722-13	COAD	MIR345	hsa-mir-345	chr14	+	5p	100307851	NA	flanking-5	NA	NA	-25	A	C	-49.7	-49.7	NA	NA
TCGA-JX-A3Q0-01A-11R-A21U-13	CESC	MIR345	hsa-mir-345	chr14	+	5p	100307856	NA	flanking-5	NA	NA	-20	G	A	-49.7	-49	NA	NA
TCGA-EE-A29P-06A-11R-A18W-13	SKCM	MIR34A	hsa-mir-34a	chr1	-	5p	9151778	NA	flanking-5	NA	NA	-22	G	A	-51	-50.7	NA	NA
TCGA-FD-A3B7-01A-31R-A20E-13	BLCA	MIR34A	hsa-mir-34a	chr1	-	5p	9151733	COSN513667	loop	NA	2	NA	C	T	-51	-49.9	NA	NA
TCGA-JX-A3Q0-01A-11R-A21U-13	CESC	MIR34A	hsa-mir-34a	chr1	-	5p	9151691	COSN16128430	flanking-3	NA	NA	2	C	G	-51	-44.7	NA	NA
TCGA-AR-A256-01A-11R-A168-13	BRCA	MIR34B	hsa-mir-34b	chr11	+	both	111513031	NA	flanking-3	NA	NA	23	G	A	-44.9	-41.3	NA	NA
TCGA-D1-A176-01A-11R-A12H-13	UCEC	MIR34C	hsa-mir-34c	chr11	+	5p	111513427	NA	flanking-5	NA	NA	-24	AT	A	-35.1	-35.1	NA	NA
TCGA-CD-5801-01A-11R-1602-13	STAD	MIR34C	hsa-mir-34c	chr11	+	5p	111513448	NA	flanking-5	NA	NA	-3	A	G	-35.1	-35.1	NA	NA
TCGA-OR-A5J8-01A-11R-A29W-13	ACC	MIR34C	hsa-mir-34c	chr11	+	5p	111513511	NA	flanking-3	NA	NA	6	A	T	-35.1	-33.6	NA	NA
TCGA-DD-AAEI-01A-11R-A41H-13	LIHC	MIR34C	hsa-mir-34c	chr11	+	5p	111513427	NA	flanking-5	NA	NA	-24	A	AT	-35.1	-35.1	NA	NA
TCGA-86-8074-01A-11H-2240-13	LUAD	MIR3605	hsa-mir-3605	chr1	-	both	33332438	NA	loop	NA	11	NA	C	A	-37.6	-37.6	NA	NA
TCGA-AP-A1DP-01A-11R-A136-13	UCEC	MIR3605	hsa-mir-3605	chr1	-	both	33332433	NA	loop	NA	16	NA	A	G	-37.6	-37.6	NA	NA
TCGA-AX-A3FT-01A-11R-A22I-13	UCEC	MIR3605	hsa-mir-3605	chr1	-	both	33332430	NA	loop	NA	19	NA	G	A	-37.6	-35.8	NA	NA
TCGA-5P-A9K4-01A-11R-A42U-13	KIRP	MIR3605	hsa-mir-3605	chr1	-	both	33332489	NA	flanking-5	NA	NA	-18	A	G	-37.6	-37.6	NA	NA
TCGA-37-3792-01A-01T-0981-13	LUSC	MIR3605	hsa-mir-3605	chr1	-	both	33332384	NA	flanking-3	NA	NA	21	C	A	-37.6	-38.3	NA	NA
TCGA-L5-A43C-01A-11R-A24L-13	ESCA	MIR361	hsa-mir-361	chrX	-	5p	85903637	NA	flanking-3	NA	NA	4	A	G	-40.5	-43.4	NA	NA
TCGA-66-2727-01A-01T-0981-13	LUSC	MIR361	hsa-mir-361	chrX	-	5p	85903616	NA	flanking-3	NA	NA	25	C	T	-40.5	-40.5	NA	NA
TCGA-22-5473-01A-01T-1634-13	LUSC	MIR361	hsa-mir-361	chrX	-	5p	85903692	COSN2378982	non-seed duplex_5p	11	NA	NA	G	A	-40.5	-38.7	NA	NA
TCGA-AX-A3FS-01A-11R-A22I-13	UCEC	MIR3613	hsa-mir-3613	chr13	-	5p	49996417	NA	flanking-3	NA	NA	9	A	G	-31.9	-34.4	NA	NA
TCGA-VS-A958-01A-11R-A42V-13	CESC	MIR3616	hsa-mir-3616	chr20	+	both	47167016	NA	loop	NA	10	NA	C	T	-58.6	-59.3	NA	NA
TCGA-EE-A2MD-06A-11R-A18W-13	SKCM	MIR362	hsa-mir-362	chrX	+	5p	50008956	NA	flanking-5	NA	NA	-12	C	T	-44.9	-42.5	NA	NA
TCGA-33-AASI-01A-22H-A404-13	LUSC	MIR362	hsa-mir-362	chrX	+	5p	50008953	NA	flanking-5	NA	NA	-15	C	G	-44.9	-45.1	NA	NA
TCGA-22-5483-01A-01T-1819-13	LUSC	MIR362	hsa-mir-362	chrX	+	5p	50008951	NA	flanking-5	NA	NA	-17	G	A	-44.9	-44.9	NA	NA
TCGA-AX-A0IZ-01A-11R-A119-13	UCEC	MIR362	hsa-mir-362	chrX	+	5p	50009001	NA	loop	NA	10	NA	G	A	-44.9	-44.4	NA	NA
TCGA-AA-3492-01A-01T-1409-13	COAD	MIR362	hsa-mir-362	chrX	+	5p	50008957	NA	flanking-5	NA	NA	-11	TC	T	-44.9	-43.9	NA	NA
TCGA-D1-A17H-01A-11R-A12H-13	UCEC	MIR3620	hsa-mir-3620	chr1	+	both	228097349	NA	flanking-3	NA	NA	8	C	T	-49.5	-49.7	NA	NA
TCGA-AB-2847-03A-01T-0736-13	LAML	MIR3620	hsa-mir-3620	chr1	+	both	228097358	NA	flanking-3	NA	NA	17	C	T	-49.5	-49.7	NA	NA
TCGA-D5-6530-01A-11H-1722-13	COAD	MIR3620	hsa-mir-3620	chr1	+	both	228097333	COSM5162053	non-seed duplex_3p	14	NA	NA	C	T	-49.5	-47.6	NA	NA
TCGA-C5-A3HE-01A-21R-A22V-13	CESC	MIR3622A	hsa-mir-3622a	chr8	+	5p	27701769	NA	flanking-3	NA	NA	22	G	C	-73.2	-73.2	NA	NA
TCGA-CV-A45P-01A-11R-A24J-13	HNSC	MIR363	hsa-mir-363	chrX	-	3p	134169360	NA	flanking-3	NA	NA	22	C	T	-35.6	-34.9	NA	NA
TCGA-D1-A16Y-01A-31R-A12H-13	UCEC	MIR363	hsa-mir-363	chrX	-	3p	134169434	COSN1085005	non-seed duplex_5p	13	NA	NA	C	T	-35.6	-34.5	NA	NA
TCGA-CG-4460-01A-01R-1157-13	STAD	MIR363	hsa-mir-363	chrX	-	3p	134169361	NA	flanking-3	NA	NA	21	G	A	-35.6	-35.6	NA	NA
TCGA-91-6829-01A-21H-1857-13	LUAD	MIR365A	hsa-mir-365a	chr16	+	3p	14309314	COSN24408400	non-seed duplex_5p	15	NA	NA	G	T	-39.2	-32.1	NA	NA
TCGA-AZ-6601-01A-11H-1773-13	COAD	MIR365A	hsa-mir-365a	chr16	+	3p	14309287	NA	flanking-5	NA	NA	-13	C	T	-39.2	-43.8	NA	NA
TCGA-K1-A3PO-01A-11R-A21U-13	SARC	MIR365A	hsa-mir-365a	chr16	+	3p	14309384	NA	flanking-3	NA	NA	23	G	T	-39.2	-39.2	NA	NA
TCGA-MY-A5BE-01A-21R-A26X-13	CESC	MIR3667	hsa-mir-3667	chr22	-	both	49543384	NA	flanking-3	NA	NA	17	A	G	-56.5	-58.9	NA	NA
TCGA-FG-8191-01A-11R-2255-13	LGG	MIR3675	hsa-mir-3675	chr1	-	both	16859005	COSN19724774	seed_5p	6	NA	NA	C	T	-29.9	-27.7	NA	NA
TCGA-AP-A1DM-01A-21R-A136-13	UCEC	MIR3679	hsa-mir-3679	chr2	+	5p	134127112	NA	flanking-5	NA	NA	-18	G	C	-44.6	-45.6	NA	NA
TCGA-Z6-AAPN-01A-11R-A407-13	ESCA	MIR3682	hsa-mir-3682	chr2	-	3p	53849115	NA	flanking-3	NA	NA	21	G	A	-49.1	-49.1	NA	NA
TCGA-EA-A6QX-01A-12R-A342-13	CESC	MIR3689A	hsa-mir-3689a	chr9	-	both	134849498	COSN19749027	non-seed duplex_3p	18	NA	NA	C	T	-53	-55.5	NA	NA
TCGA-LN-A49W-01A-11R-A261-13	ESCA	MIR3689B	hsa-mir-3689b	chr9	-	5p	134850171	COSN15145755	non-seed duplex_3p	17	NA	NA	A	G	-57.6	-58.5	NA	NA
TCGA-CG-5734-01A-11R-1602-13	STAD	MIR369	hsa-mir-369	chr14	+	3p	101065611	COSN23023779	seed_5p	6	NA	NA	G	A	-36	-36.3	NA	NA
TCGA-A2-A04W-01A-31R-A114-13	BRCA	MIR369	hsa-mir-369	chr14	+	3p	101065634	COSN23014475	loop	NA	7	NA	G	A	-36	-36	NA	NA
TCGA-CD-5801-01A-11R-1602-13	STAD	MIR369	hsa-mir-369	chr14	+	3p	101065610	COSN19673117	seed_5p	5	NA	NA	C	T	-36	-33.8	NA	NA
TCGA-49-AARQ-01A-11H-A41D-13	LUAD	MIR369	hsa-mir-369	chr14	+	3p	101065671	NA	flanking-3	NA	NA	10	C	G	-36	-33.1	NA	NA
TCGA-D5-5540-01A-01T-1652-13	COAD	MIR369	hsa-mir-369	chr14	+	3p	101065584	NA	flanking-5	NA	NA	-22	G	A	-36	-36	NA	NA
TCGA-EE-A29S-06A-11R-A18W-13	SKCM	MIR369	hsa-mir-369	chr14	+	3p	101065590	NA	flanking-5	NA	NA	-16	C	T	-36	-36	NA	NA
TCGA-FU-A3HZ-01A-11R-A214-13	CESC	MIR369	hsa-mir-369	chr14	+	3p	101065639	COSN1080976	loop	NA	12	NA	C	T	-36	-34.7	NA	NA
TCGA-EE-A3JD-06A-11R-A20E-13	SKCM	MIR369	hsa-mir-369	chr14	+	3p	101065639	COSN1080976	loop	NA	12	NA	C	T	-36	-34.7	NA	NA
TCGA-BS-A0TC-01A-11R-A103-13	UCEC	MIR369	hsa-mir-369	chr14	+	3p	101065639	COSN1080976	loop	NA	12	NA	C	T	-36	-34.7	NA	NA
TCGA-DA-A1HV-06A-21R-A18V-13	SKCM	MIR369	hsa-mir-369	chr14	+	3p	101065655	COSN23023937	non-seed duplex_3p	15	NA	NA	G	A	-36	-31.4	NA	NA
TCGA-MY-A913-01A-11R-A37P-13	CESC	MIR3691	hsa-mir-3691	chr6	-	5p	5148223	NA	flanking-3	NA	NA	23	C	A	-66.1	-65.6	NA	NA
TCGA-EB-A4OY-01A-11R-A25Z-13	SKCM	MIR370	hsa-mir-370	chr14	+	3p	100911131	NA	flanking-5	NA	NA	-20	G	A	-39.6	-39.1	NA	NA
TCGA-55-7907-01A-11H-2169-13	LUAD	MIR371A	hsa-mir-371a	chr19	+	both	53787707	COSN24410698	loop	NA	8	NA	C	G	-46.9	-47.6	NA	NA
TCGA-55-7907-01A-11H-2169-13	LUAD	MIR371B	hsa-mir-371b	chr19	-	5p	53787707	COSN24410698	loop	NA	8	NA	C	G	-48.2	-48.2	NA	NA
TCGA-IA-A83V-01A-11R-A359-13	KIRP	MIR371B	hsa-mir-371b	chr19	-	5p	53787758	NA	flanking-5	NA	NA	-22	A	G	-48.2	-50.7	NA	NA
TCGA-5L-AAT1-01A-12R-A41G-13	BRCA	MIR371B	hsa-mir-371b	chr19	-	5p	53787660	NA	flanking-3	NA	NA	18	G	A	-48.2	-45.9	NA	NA
TCGA-BF-AAOX-01A-11R-A39J-13	SKCM	MIR371B	hsa-mir-371b	chr19	-	5p	53787653	NA	flanking-3	NA	NA	25	C	T	-48.2	-48.2	NA	NA
TCGA-DD-AADJ-01A-11R-A41H-13	LIHC	MIR372	hsa-mir-372	chr19	+	3p	53787973	NA	flanking-3	NA	NA	20	A	G	-40.4	-40.4	NA	NA
TCGA-HP-A5N0-01A-11R-A28Z-13	LIHC	MIR372	hsa-mir-372	chr19	+	3p	53787942	COSN16303213	non-seed duplex_3p	12	NA	NA	A	C	-40.4	-40	NA	NA
TCGA-AO-A0J9-01A-11R-A035-13	BRCA	MIR372	hsa-mir-372	chr19	+	3p	53787975	NA	flanking-3	NA	NA	22	C	T	-40.4	-40.4	NA	NA
TCGA-DD-AAD8-01A-11R-A41H-13	LIHC	MIR372	hsa-mir-372	chr19	+	3p	53787975	NA	flanking-3	NA	NA	22	C	T	-40.4	-40.4	NA	NA
TCGA-B5-A0K9-01A-21R-A103-13	UCEC	MIR373	hsa-mir-373	chr19	+	3p	53788690	NA	flanking-5	NA	NA	-20	C	T	-49.1	-53	NA	NA
TCGA-A6-A566-01A-11H-A28I-13	COAD	MIR374B	hsa-mir-374b	chrX	-	5p	74218546	NA	flanking-3	NA	NA	11	T	C	-43.3	-43.3	NA	NA
TCGA-G3-A5SK-01A-11R-A27R-13	LIHC	MIR374B	hsa-mir-374b	chrX	-	5p	74218572	COSN16303142	seed_3p	7	NA	NA	T	G	-43.3	-38.7	NA	NA
TCGA-AB-2808-03A-01T-0734-13	LAML	MIR374B	hsa-mir-374b	chrX	-	5p	74218618	NA	flanking-5	NA	NA	-10	T	A	-43.3	-43.5	NA	NA
TCGA-B5-A11L-01B-21R-A13R-13	UCEC	MIR374B	hsa-mir-374b	chrX	-	5p	74218537	NA	flanking-3	NA	NA	20	C	T	-43.3	-43.4	NA	NA
TCGA-E6-A1M0-01A-11R-A143-13	UCEC	MIR374B	hsa-mir-374b	chrX	-	5p	74218626	NA	flanking-5	NA	NA	-18	C	A	-43.3	-42.6	NA	NA
TCGA-AB-2808-03A-01T-0734-13	LAML	MIR374C	hsa-mir-374c	chrX	+	both	74218618	NA	flanking-3	NA	NA	10	T	A	-41.5	-40.2	NA	NA
TCGA-A1-A0SN-01A-11R-A143-13	BRCA	MIR376B	hsa-mir-376b	chr14	+	3p	101040441	NA	flanking-5	NA	NA	-18	C	T	-36.1	-36.1	NA	NA
TCGA-IR-A3LI-01A-11R-A214-13	CESC	MIR376C	hsa-mir-376c	chr14	+	3p	101039762	NA	flanking-3	NA	NA	10	C	T	-33.8	-31.7	NA	NA
TCGA-UF-A71D-01A-12R-A34O-13	HNSC	MIR376C	hsa-mir-376c	chr14	+	3p	101039773	NA	flanking-3	NA	NA	21	T	C	-33.8	-33.1	NA	NA
TCGA-YC-A89H-01A-11R-A36A-13	BLCA	MIR376C	hsa-mir-376c	chr14	+	3p	101039672	NA	flanking-5	NA	NA	-22	A	G	-33.8	-33.8	NA	NA
TCGA-YD-A9TA-06A-11R-A39J-13	SKCM	MIR376C	hsa-mir-376c	chr14	+	3p	101039697	COSN2530057	seed_5p	4	NA	NA	G	A	-33.8	-27.3	NA	NA
TCGA-CH-5761-01A-11R-1579-13	PRAD	MIR376C	hsa-mir-376c	chr14	+	3p	101039698	COSN2380759	seed_5p	5	NA	NA	G	T	-33.8	-27.8	NA	NA
TCGA-A7-A0CE-01A-11R-A010-13	BRCA	MIR376C	hsa-mir-376c	chr14	+	3p	101039763	NA	flanking-3	NA	NA	11	A	T	-33.8	-30.8	NA	NA
TCGA-94-7033-01A-11H-1948-13	LUSC	MIR377	hsa-mir-377	chr14	+	3p	101062045	NA	flanking-5	NA	NA	-11	G	C	-43.8	-38.1	NA	NA
TCGA-49-AAR4-01A-12H-A41D-13	LUAD	MIR377	hsa-mir-377	chr14	+	3p	101062032	NA	flanking-5	NA	NA	-24	C	A	-43.8	-41.2	NA	NA
TCGA-DM-A1DA-01A-11H-A154-13	COAD	MIR377	hsa-mir-377	chr14	+	3p	101062136	NA	flanking-3	NA	NA	21	G	A	-43.8	-42.8	NA	NA
TCGA-43-2576-01A-01T-1557-13	LUSC	MIR377	hsa-mir-377	chr14	+	3p	101062083	NA	loop	NA	6	NA	A	G	-43.8	-43.8	NA	NA
TCGA-JW-A5VL-01A-11R-A28L-13	CESC	MIR377	hsa-mir-377	chr14	+	3p	101062072	COSN16131455	non-seed duplex_5p	17	NA	NA	G	A	-43.8	-39.5	NA	NA
TCGA-D7-6518-01A-11R-1802-13	STAD	MIR379	hsa-mir-379	chr14	+	5p	101022093	COSN7428815	loop	NA	2	NA	G	A	-37.8	-38.5	NA	NA
TCGA-55-7574-01A-11H-2038-13	LUAD	MIR379	hsa-mir-379	chr14	+	5p	101022151	NA	flanking-3	NA	NA	21	C	T	-37.8	-39.3	NA	NA
TCGA-FD-A6TI-01A-11R-A32J-13	BLCA	MIR379	hsa-mir-379	chr14	+	5p	101022067	NA	flanking-5	NA	NA	-4	G	C	-37.8	-33.4	NA	NA
TCGA-CK-6747-01A-11H-1838-13	COAD	MIR379	hsa-mir-379	chr14	+	5p	101022093	COSN7428815	loop	NA	2	NA	G	A	-37.8	-38.5	NA	NA
TCGA-CV-5443-01A-01R-1513-13	HNSC	MIR379	hsa-mir-379	chr14	+	5p	101022093	COSN7428815	loop	NA	2	NA	G	A	-37.8	-38.5	NA	NA
TCGA-VQ-A91D-01A-11R-A415-13	STAD	MIR379	hsa-mir-379	chr14	+	5p	101022054	NA	flanking-5	NA	NA	-17	C	T	-37.8	-37.8	NA	NA
TCGA-D3-A5GL-06A-11R-A27U-13	SKCM	MIR379	hsa-mir-379	chr14	+	5p	101022139	NA	flanking-3	NA	NA	9	C	T	-37.8	-36.7	NA	NA
TCGA-FR-A8YE-06A-11R-A37G-13	SKCM	MIR379	hsa-mir-379	chr14	+	5p	101022145	NA	flanking-3	NA	NA	15	C	T	-37.8	-37.2	NA	NA
TCGA-GN-A4U8-06A-11R-A360-13	SKCM	MIR379	hsa-mir-379	chr14	+	5p	101022061	NA	flanking-5	NA	NA	-10	C	T	-37.8	-38.5	NA	NA
TCGA-YD-A9TA-06A-11R-A39J-13	SKCM	MIR381	hsa-mir-381	chr14	+	3p	101045996	NA	flanking-3	NA	NA	7	C	T	-50.5	-48.4	NA	NA
TCGA-A5-A0R7-01A-31R-A103-13	UCEC	MIR381	hsa-mir-381	chr14	+	3p	101045927	COSN2381583	non-seed duplex_5p	1	NA	NA	A	G	-50.5	-50.5	NA	NA
TCGA-GN-A9SD-06A-11R-A404-13	SKCM	MIR381	hsa-mir-381	chr14	+	3p	101045965	NA	loop	NA	17	NA	G	A	-50.5	-48.2	NA	NA
TCGA-EE-A2MI-06A-11R-A18X-13	SKCM	MIR382	hsa-mir-382	chr14	+	5p	101054377	NA	flanking-3	NA	NA	5	C	T	-37.2	-36	NA	NA
TCGA-CG-5730-01A-11R-1602-13	STAD	MIR382	hsa-mir-382	chr14	+	5p	101054348	NA	loop	NA	11	NA	G	T	-37.2	-37	NA	NA
TCGA-AA-3949-01A-01T-1021-13	COAD	MIR382	hsa-mir-382	chr14	+	5p	101054389	NA	flanking-3	NA	NA	17	C	A	-37.2	-37.5	NA	NA
TCGA-61-1741-01A-02R-1567-13	OV	MIR382	hsa-mir-382	chr14	+	5p	101054295	NA	flanking-5	NA	NA	-21	C	A	-37.2	-36.5	NA	NA
TCGA-D3-A51G-06A-11R-A25Z-13	SKCM	MIR382	hsa-mir-382	chr14	+	5p	101054351	COSN1080985	loop	NA	14	NA	G	A	-37.2	-31	NA	NA
TCGA-YG-AA3N-01A-11R-A38N-13	SKCM	MIR382	hsa-mir-382	chr14	+	5p	101054351	COSN1080985	loop	NA	14	NA	G	A	-37.2	-31	NA	NA
TCGA-HF-A5NB-01A-11R-A31Q-13	STAD	MIR382	hsa-mir-382	chr14	+	5p	101054344	NA	loop	NA	7	NA	T	G	-37.2	-37.2	NA	NA
TCGA-GN-A8LK-06A-11R-A37G-13	SKCM	MIR382	hsa-mir-382	chr14	+	5p	101054377	NA	flanking-3	NA	NA	5	C	T	-37.2	-36	NA	NA
TCGA-ZF-A9R7-01A-11R-A38M-13	BLCA	MIR383	hsa-mir-383	chr8	-	5p	14853440	NA	flanking-3	NA	NA	3	C	A	-36.7	-33.7	NA	NA
TCGA-DD-AACH-01A-11R-A41H-13	LIHC	MIR383	hsa-mir-383	chr8	-	5p	14853508	NA	flanking-5	NA	NA	-4	G	A	-36.7	-34.9	NA	NA
TCGA-D1-A16J-01A-11R-A12H-13	UCEC	MIR383	hsa-mir-383	chr8	-	5p	14853445	COSN4710462	non-seed duplex_3p	17	NA	NA	T	A	-36.7	-42	NA	NA
TCGA-PG-A914-01A-11R-A37P-13	UCEC	MIR3925	hsa-mir-3925	chr6	-	5p	36622430	NA	flanking-3	NA	NA	16	G	C	-53.6	-55.8	NA	NA
TCGA-AZ-6601-01A-11H-1773-13	COAD	MIR3940	hsa-mir-3940	chr19	-	3p	6416449	COSN7451488	seed_3p	7	NA	NA	C	T	-49	-46.5	NA	NA
TCGA-HU-A4GX-01A-12R-A252-13	STAD	MIR3940	hsa-mir-3940	chr19	-	3p	6416459	NA	loop	NA	11	NA	G	T	-49	-44.5	NA	NA
TCGA-CC-A7IK-01A-12R-A343-13	LIHC	MIR3940	hsa-mir-3940	chr19	-	3p	6416506	NA	flanking-5	NA	NA	-17	A	G	-49	-49	NA	NA
TCGA-DK-AA6L-01A-11R-A39B-13	BLCA	MIR3940	hsa-mir-3940	chr19	-	3p	6416449	COSN7451488	seed_3p	7	NA	NA	C	T	-49	-46.5	NA	NA
TCGA-EY-A1GX-01A-12R-A13R-13	UCEC	MIR3942	hsa-mir-3942	chr15	-	both	35372315	NA	loop	NA	6	NA	C	A	-45.4	-42.2	NA	NA
TCGA-FS-A1ZD-06A-11R-A18W-13	SKCM	MIR409	hsa-mir-409	chr14	+	both	101065343	COSN2381577	loop	NA	7	NA	G	A	-40.5	-40.1	NA	NA
TCGA-L5-A88S-01A-11R-A36E-13	ESCA	MIR409	hsa-mir-409	chr14	+	both	101065342	NA	loop	NA	6	NA	C	T	-40.5	-44	NA	NA
TCGA-EE-A2MR-06A-11R-A18V-13	SKCM	MIR409	hsa-mir-409	chr14	+	both	101065366	COSN23022149	non-seed duplex_3p	21	NA	NA	C	T	-40.5	-38.2	NA	NA
TCGA-64-1676-01A-01T-0947-13	LUAD	MIR409	hsa-mir-409	chr14	+	both	101065373	COSN24408235	flanking-3	NA	NA	6	G	A	-40.5	-38.5	NA	NA
TCGA-GU-AATQ-01A-11R-A39B-13	BLCA	MIR409	hsa-mir-409	chr14	+	both	101065342	NA	loop	NA	6	NA	C	A	-40.5	-40.8	NA	NA
TCGA-55-8089-01A-11H-2240-13	LUAD	MIR409	hsa-mir-409	chr14	+	both	101065372	COSN24410127	flanking-3	NA	NA	5	G	T	-40.5	-36.9	NA	NA
TCGA-AP-A0LP-01A-12R-A103-13	UCEC	MIR409	hsa-mir-409	chr14	+	both	101065343	COSN2381577	loop	NA	7	NA	G	A	-40.5	-40.1	NA	NA
TCGA-EE-A2MS-06A-11R-A18V-13	SKCM	MIR409	hsa-mir-409	chr14	+	both	101065366	COSN23022149	non-seed duplex_3p	21	NA	NA	C	T	-40.5	-38.2	NA	NA
TCGA-A8-A09Z-01A-11R-A010-13	BRCA	MIR409	hsa-mir-409	chr14	+	both	101065342	NA	loop	NA	6	NA	C	T	-40.5	-44	NA	NA
TCGA-E7-A85H-01A-11R-A358-13	BLCA	MIR410	hsa-mir-410	chr14	+	3p	101065991	NA	flanking-3	NA	NA	10	C	T	-43.4	-41.1	NA	NA
TCGA-B6-A0RO-01A-22R-A085-13	BRCA	MIR410	hsa-mir-410	chr14	+	3p	101065928	COSN23014476	seed_5p	4	NA	NA	T	A	-43.4	-38.8	NA	NA
TCGA-43-6143-01A-11H-1819-13	LUSC	MIR410	hsa-mir-410	chr14	+	3p	101065997	NA	flanking-3	NA	NA	16	C	G	-43.4	-42.4	NA	NA
TCGA-EE-A3J5-06A-11R-A20E-13	SKCM	MIR410	hsa-mir-410	chr14	+	3p	101065985	NA	flanking-3	NA	NA	4	C	T	-43.4	-41.2	NA	NA
TCGA-LN-A4A4-01A-11R-A261-13	ESCA	MIR411	hsa-mir-411	chr14	+	5p	101023327	NA	flanking-5	NA	NA	-13	G	T	-29.8	-27	NA	NA
TCGA-IR-A3LA-01A-11R-A22V-13	CESC	MIR411	hsa-mir-411	chr14	+	5p	101023318	NA	flanking-5	NA	NA	-22	C	G	-29.8	-29	NA	NA
TCGA-CR-7388-01A-11R-2015-13	HNSC	MIR411	hsa-mir-411	chr14	+	5p	101023320	NA	flanking-5	NA	NA	-20	C	T	-29.8	-29	NA	NA
TCGA-VQ-A91D-01A-11R-A415-13	STAD	MIR411	hsa-mir-411	chr14	+	5p	101023330	NA	flanking-5	NA	NA	-10	C	G	-29.8	-29.1	NA	NA
TCGA-78-7535-01A-11H-2065-13	LUAD	MIR411	hsa-mir-411	chr14	+	5p	101023358	COSN24410137	non-seed duplex_5p	19	NA	NA	A	T	-29.8	-28.1	NA	NA
TCGA-E6-A1M0-01A-11R-A143-13	UCEC	MIR411	hsa-mir-411	chr14	+	5p	101023417	NA	flanking-3	NA	NA	21	C	T	-29.8	-30.9	NA	NA
TCGA-DX-A8BP-01A-11R-A37H-13	SARC	MIR411	hsa-mir-411	chr14	+	5p	101023365	NA	loop	NA	5	NA	A	C	-29.8	-30.3	NA	NA
TCGA-D3-A5GN-06A-11R-A27U-13	SKCM	MIR411	hsa-mir-411	chr14	+	5p	101023415	NA	flanking-3	NA	NA	19	C	T	-29.8	-29.8	NA	NA
TCGA-L5-A8NM-01A-11R-A37J-13	ESCA	MIR411	hsa-mir-411	chr14	+	5p	101023372	NA	loop	NA	12	NA	A	G	-29.8	-35.9	NA	NA
TCGA-WE-A8ZT-06A-11R-A37G-13	SKCM	MIR411	hsa-mir-411	chr14	+	5p	101023414	NA	flanking-3	NA	NA	18	C	T	-29.8	-29.8	NA	NA
TCGA-5M-AAT6-01A-11H-A41D-13	COAD	MIR412	hsa-mir-412	chr14	+	5p	101065455	NA	flanking-5	NA	NA	-10	C	T	-38.9	-40.4	NA	NA
TCGA-10-0933-01A-01R-1569-13	OV	MIR412	hsa-mir-412	chr14	+	5p	101065525	COSN15665008	flanking-3	NA	NA	3	G	A	-38.9	-39.3	NA	NA
TCGA-CV-5977-01A-11R-1685-13	HNSC	MIR412	hsa-mir-412	chr14	+	5p	101065492	NA	loop	NA	5	NA	T	C	-38.9	-38.9	NA	NA
TCGA-MP-A4T7-01A-11H-A24S-13	LUAD	MIR412	hsa-mir-412	chr14	+	5p	101065531	NA	flanking-3	NA	NA	9	G	C	-38.9	-40.4	NA	NA
TCGA-CG-5727-01A-11R-1602-13	STAD	MIR412	hsa-mir-412	chr14	+	5p	101065531	NA	flanking-3	NA	NA	9	G	A	-38.9	-38.8	NA	NA
TCGA-A6-3810-01A-01T-1021-13	COAD	MIR412	hsa-mir-412	chr14	+	5p	101065525	COSN15665008	flanking-3	NA	NA	3	G	A	-38.9	-39.3	NA	NA
TCGA-09-2051-01A-01R-1568-13	OV	MIR412	hsa-mir-412	chr14	+	5p	101065533	NA	flanking-3	NA	NA	11	T	G	-38.9	-39.6	NA	NA
TCGA-BR-8363-01A-11R-2343-13	STAD	MIR412	hsa-mir-412	chr14	+	5p	101065441	NA	flanking-5	NA	NA	-24	A	G	-38.9	-39.9	NA	NA
TCGA-MF-A522-01A-11H-A263-13	LUSC	MIR412	hsa-mir-412	chr14	+	5p	101065529	NA	flanking-3	NA	NA	7	C	G	-38.9	-38.5	NA	NA
TCGA-24-1422-01A-01R-1565-13	OV	MIR423	hsa-mir-423	chr17	+	5p	30117165	NA	flanking-3	NA	NA	12	A	C	-52.2	-52.2	NA	NA
TCGA-G4-6303-01A-11H-1773-13	COAD	MIR424	hsa-mir-424	chrX	-	5p	134546635	NA	flanking-3	NA	NA	9	C	T	-53.2	-51.5	NA	NA
TCGA-BC-A217-01A-11R-A154-13	LIHC	MIR424	hsa-mir-424	chrX	-	5p	134546724	NA	flanking-5	NA	NA	-23	G	T	-53.2	-51.4	NA	NA
TCGA-EO-A22T-01A-21R-A18L-13	UCEC	MIR424	hsa-mir-424	chrX	-	5p	134546629	NA	flanking-3	NA	NA	15	T	C	-53.2	-53.5	NA	NA
TCGA-B5-A11N-01A-11R-A119-13	UCEC	MIR424	hsa-mir-424	chrX	-	5p	134546636	NA	flanking-3	NA	NA	8	G	A	-53.2	-51.1	NA	NA
TCGA-24-2033-01A-01R-1568-13	OV	MIR424	hsa-mir-424	chrX	-	5p	134546620	NA	flanking-3	NA	NA	24	C	T	-53.2	-50.4	NA	NA
TCGA-IR-A3LI-01A-11R-A214-13	CESC	MIR425	hsa-mir-425	chr3	-	5p	49020178	COSN16131364	seed_3p	3	NA	NA	G	A	-39.3	-38	NA	NA
TCGA-78-7167-01A-11H-2065-13	LUAD	MIR425	hsa-mir-425	chr3	-	5p	49020134	NA	flanking-3	NA	NA	25	T	A	-39.3	-38.6	NA	NA
TCGA-CM-6674-01A-11H-1838-13	COAD	MIR431	hsa-mir-431	chr14	+	3p	100881038	COSM1368245	non-seed duplex_5p	13	NA	NA	C	T	-51.5	-49.3	NA	NA
TCGA-G4-6588-01A-11H-1773-13	COAD	MIR431	hsa-mir-431	chr14	+	3p	100881065	COSM469661	loop	NA	19	NA	G	A	-51.5	-51.5	NA	NA
TCGA-G4-6293-01A-11H-1722-13	COAD	MIR431	hsa-mir-431	chr14	+	3p	100881075	COSM1368246	seed_3p	7	NA	NA	G	A	-51.5	-54.1	NA	NA
TCGA-PG-A7D5-01A-11R-A34O-13	UCEC	MIR431	hsa-mir-431	chr14	+	3p	100881003	NA	flanking-5	NA	NA	-23	G	A	-51.5	-47.6	NA	NA
TCGA-CG-4442-01A-01R-1157-13	STAD	MIR431	hsa-mir-431	chr14	+	3p	100881044	COSM4049095	non-seed duplex_5p	19	NA	NA	G	A	-51.5	-50.5	NA	NA
TCGA-CJ-4902-01A-01R-1425-13	KIRC	MIR431	hsa-mir-431	chr14	+	3p	100881065	COSM469661	loop	NA	19	NA	G	A	-51.5	-51.5	NA	NA
TCGA-90-7769-01A-11H-2124-13	LUSC	MIR431	hsa-mir-431	chr14	+	3p	100881096	NA	flanking-3	NA	NA	6	G	T	-51.5	-47.9	NA	NA
TCGA-SW-A7EA-01A-12R-A353-13	STAD	MIR432	hsa-mir-432	chr14	+	5p	100884580	NA	flanking-3	NA	NA	16	G	T	-47.2	-49.1	NA	NA
TCGA-95-7043-01A-11H-1948-13	LUAD	MIR432	hsa-mir-432	chr14	+	5p	100884582	NA	flanking-3	NA	NA	18	C	T	-47.2	-45.2	NA	NA
TCGA-CK-5916-01A-11H-1652-13	COAD	MIR432	hsa-mir-432	chr14	+	5p	100884536	COSM3689905	loop	NA	18	NA	G	A	-47.2	-47.2	NA	NA
TCGA-EE-A2MJ-06A-11R-A18V-13	SKCM	MIR432	hsa-mir-432	chr14	+	5p	100884530	COSM1707885	loop	NA	12	NA	C	T	-47.2	-47.2	NA	NA
TCGA-EE-A3JD-06A-11R-A20E-13	SKCM	MIR432	hsa-mir-432	chr14	+	5p	100884472	NA	flanking-5	NA	NA	-24	G	A	-47.2	-47.2	NA	NA
TCGA-DD-A3A9-01A-11R-A25Z-13	LIHC	MIR432	hsa-mir-432	chr14	+	5p	100884538	COSM4920680	loop	NA	20	NA	G	A	-47.2	-45.3	NA	NA
TCGA-AG-3999-01A-01T-1120-13	READ	MIR432	hsa-mir-432	chr14	+	5p	100884582	NA	flanking-3	NA	NA	18	C	T	-47.2	-45.2	NA	NA
TCGA-EE-A3J5-06A-11R-A20E-13	SKCM	MIR432	hsa-mir-432	chr14	+	5p	100884530	COSM1707885	loop	NA	12	NA	C	T	-47.2	-47.2	NA	NA
TCGA-NC-A5HN-01A-11H-A26V-13	LUSC	MIR432	hsa-mir-432	chr14	+	5p	100884569	NA	flanking-3	NA	NA	5	G	A	-47.2	-43.9	NA	NA
TCGA-QR-A6H5-01A-11R-A35M-13	PCPG	MIR433	hsa-mir-433	chr14	+	3p	100881893	NA	flanking-5	NA	NA	-4	G	A	-43.2	-43.5	NA	NA
TCGA-CG-4441-01A-01R-1802-13	STAD	MIR433	hsa-mir-433	chr14	+	3p	100881965	COSM381402	non-seed duplex_3p	17	NA	NA	C	T	-43.2	-41.2	NA	NA
TCGA-EB-A3XF-01A-31R-A23A-13	SKCM	MIR433	hsa-mir-433	chr14	+	3p	100881932	COSM4846326	loop	NA	14	NA	C	T	-43.2	-42.7	NA	NA
TCGA-IR-A3LI-01A-11R-A214-13	CESC	MIR433	hsa-mir-433	chr14	+	3p	100881932	COSM4846326	loop	NA	14	NA	C	T	-43.2	-42.7	NA	NA
TCGA-BG-A0M4-01A-11R-A103-13	UCEC	MIR433	hsa-mir-433	chr14	+	3p	100881982	NA	flanking-3	NA	NA	12	C	T	-43.2	-44.7	NA	NA
TCGA-W3-AA1R-06A-11R-A39J-13	SKCM	MIR433	hsa-mir-433	chr14	+	3p	100881924	NA	loop	NA	6	NA	G	A	-43.2	-41.3	NA	NA
TCGA-EB-A85J-01A-12R-A358-13	SKCM	MIR433	hsa-mir-433	chr14	+	3p	100881974	NA	flanking-3	NA	NA	4	C	T	-43.2	-40.4	NA	NA
TCGA-18-3406-01A-01T-0981-13	LUSC	MIR433	hsa-mir-433	chr14	+	3p	100881935	COSM697087	loop	NA	17	NA	C	T	-43.2	-41.28	NA	NA
TCGA-CG-4442-01A-01R-1157-13	STAD	MIR433	hsa-mir-433	chr14	+	3p	100881899	COSM3419628	seed_5p	3	NA	NA	C	T	-43.2	-41.5	NA	NA
TCGA-QQ-A8VF-01A-11R-A37H-13	SARC	MIR433	hsa-mir-433	chr14	+	3p	100881899	COSM3419628	seed_5p	3	NA	NA	C	T	-43.2	-41.5	NA	NA
TCGA-AX-A3FS-01A-11R-A22I-13	UCEC	MIR4485	hsa-mir-4485	chr11	-	3p	10508323	NA	flanking-5	NA	NA	-3	C	A	-24.5	-20	NA	NA
TCGA-DF-A2KV-01A-11R-A17X-13	UCEC	MIR449B	hsa-mir-449b	chr5	-	5p	55170654	NA	flanking-3	NA	NA	13	T	G	-36	-37.9	NA	NA
TCGA-5L-AAT0-01A-12R-A41G-13	BRCA	MIR449B	hsa-mir-449b	chr5	-	5p	55170696	NA	loop	NA	10	NA	G	C	-36	-36	NA	NA
TCGA-EW-A1IZ-01A-11R-A13P-13	BRCA	MIR449B	hsa-mir-449b	chr5	-	5p	55170653	NA	flanking-3	NA	NA	14	T	A	-36	-36	NA	NA
TCGA-61-2094-01A-01R-1568-13	OV	MIR450B	hsa-mir-450b	chrX	-	5p	134540189	NA	flanking-3	NA	NA	5	A	T	-30.5	-26.7	NA	NA
TCGA-N5-A4RA-01A-11R-A28Z-13	UCS	MIR452	hsa-mir-452	chrX	-	5p	151959619	NA	flanking-3	NA	NA	15	A	G	-44.1	-43.9	NA	NA
TCGA-B7-5816-01A-21R-1602-13	STAD	MIR452	hsa-mir-452	chrX	-	5p	151959620	NA	flanking-3	NA	NA	14	G	T	-44.1	-44.4	NA	NA
TCGA-2H-A9GM-01A-11R-A37J-13	ESCA	MIR452	hsa-mir-452	chrX	-	5p	151959660	NA	loop	NA	18	NA	A	C	-44.1	-39.7	NA	NA
TCGA-BC-A112-01A-11R-A130-13	LIHC	MIR452	hsa-mir-452	chrX	-	5p	151959609	NA	flanking-3	NA	NA	25	T	C	-44.1	-48	NA	NA
TCGA-D7-A4YV-01A-11R-A252-13	STAD	MIR454	hsa-mir-454	chr17	-	3p	59137873	NA	flanking-5	NA	NA	-24	AT	A	-38.6	-38.6	NA	NA
TCGA-CG-5726-01A-11R-1602-13	STAD	MIR454	hsa-mir-454	chr17	-	3p	59137873	NA	flanking-5	NA	NA	-24	AT	A	-38.6	-38.6	NA	NA
TCGA-RD-A8NB-01A-12R-A39F-13	STAD	MIR454	hsa-mir-454	chr17	-	3p	59137873	NA	flanking-5	NA	NA	-24	AT	A	-38.6	-38.6	NA	NA
TCGA-AJ-A2QO-01A-11R-A18L-13	UCEC	MIR454	hsa-mir-454	chr17	-	3p	59137873	NA	flanking-5	NA	NA	-24	AT	A	-38.6	-38.6	NA	NA
TCGA-VQ-A91D-01A-11R-A415-13	STAD	MIR454	hsa-mir-454	chr17	-	3p	59137873	NA	flanking-5	NA	NA	-24	AT	A	-38.6	-38.6	NA	NA
TCGA-VQ-A91K-01A-11R-A415-13	STAD	MIR454	hsa-mir-454	chr17	-	3p	59137873	NA	flanking-5	NA	NA	-24	AT	A	-38.6	-38.6	NA	NA
TCGA-VQ-A924-01A-11R-A415-13	STAD	MIR454	hsa-mir-454	chr17	-	3p	59137873	NA	flanking-5	NA	NA	-24	AT	A	-38.6	-38.6	NA	NA
TCGA-DD-AADF-01A-11R-A41H-13	LIHC	MIR454	hsa-mir-454	chr17	-	3p	59137771	NA	flanking-3	NA	NA	16	C	A	-38.6	-37.8	NA	NA
TCGA-AO-A128-01A-11R-A10I-13	BRCA	MIR454	hsa-mir-454	chr17	-	3p	59137873	NA	flanking-5	NA	NA	-24	AT	A	-38.6	-38.6	NA	NA
TCGA-WE-AAA3-06A-11R-A38N-13	SKCM	MIR455	hsa-mir-455	chr9	+	both	114209435	NA	flanking-5	NA	NA	-14	C	T	-45.4	-45.4	NA	NA
TCGA-D7-A6EY-01A-21R-A31Q-13	STAD	MIR455	hsa-mir-455	chr9	+	both	114209428	NA	flanking-5	NA	NA	-21	C	T	-45.4	-41.6	NA	NA
TCGA-VQ-A8PP-01A-21R-A415-13	STAD	MIR4639	hsa-mir-4639	chr6	+	5p	16141641	NA	flanking-3	NA	NA	19	C	T	-27.5	-26.6	NA	NA
TCGA-D5-6929-01A-31H-1927-13	COAD	MIR4640	hsa-mir-4640	chr6	+	both	30890881	NA	flanking-5	NA	NA	-10	C	T	-69	-68.3	NA	NA
TCGA-GF-A769-01A-32R-A360-13	SKCM	MIR4640	hsa-mir-4640	chr6	+	both	30890943	NA	loop	NA	30	NA	C	T	-69	-66.1	NA	NA
TCGA-05-4382-01A-01T-1207-13	LUAD	MIR4649	hsa-mir-4649	chr7	+	both	44110830	NA	flanking-5	NA	NA	-21	C	T	-60.9	-59.2	NA	NA
TCGA-CG-4460-01A-01R-1157-13	STAD	MIR4649	hsa-mir-4649	chr7	+	both	44110927	NA	flanking-3	NA	NA	16	C	T	-60.9	-60.8	NA	NA
TCGA-DI-A1BY-01A-21R-A136-13	UCEC	MIR4668	hsa-mir-4668	chr9	+	5p	111932183	NA	flanking-3	NA	NA	14	C	T	-24.15	-21.27	NA	NA
TCGA-CG-5723-01A-11R-1602-13	STAD	MIR4668	hsa-mir-4668	chr9	+	5p	111932103	COSN23024310	seed_5p	4	NA	NA	GA	G	-24.15	-23.1	NA	NA
TCGA-B5-A0K9-01A-21R-A103-13	UCEC	MIR4668	hsa-mir-4668	chr9	+	5p	111932103	COSN23024310	seed_5p	4	NA	NA	GA	G	-24.15	-23.1	NA	NA
TCGA-D1-A17H-01A-11R-A12H-13	UCEC	MIR4668	hsa-mir-4668	chr9	+	5p	111932103	COSN23024310	seed_5p	4	NA	NA	GA	G	-24.15	-23.1	NA	NA
TCGA-AP-A1DP-01A-11R-A136-13	UCEC	MIR4668	hsa-mir-4668	chr9	+	5p	111932103	COSN23024310	seed_5p	4	NA	NA	GA	G	-24.15	-23.1	NA	NA
TCGA-D1-A17R-01A-11R-A12H-13	UCEC	MIR4668	hsa-mir-4668	chr9	+	5p	111932103	COSN23024310	seed_5p	4	NA	NA	GA	G	-24.15	-23.1	NA	NA
TCGA-D1-A101-01A-12R-A10I-13	UCEC	MIR4668	hsa-mir-4668	chr9	+	5p	111932103	COSN23024310	seed_5p	4	NA	NA	GA	G	-24.15	-23.1	NA	NA
TCGA-AP-A1DR-01A-11R-A136-13	UCEC	MIR4668	hsa-mir-4668	chr9	+	5p	111932103	COSN23024310	seed_5p	4	NA	NA	GA	G	-24.15	-23.1	NA	NA
TCGA-B7-5816-01A-21R-1602-13	STAD	MIR4668	hsa-mir-4668	chr9	+	5p	111932103	COSN23024310	seed_5p	4	NA	NA	GA	G	-24.15	-23.1	NA	NA
TCGA-AX-A06H-01A-11R-A119-13	UCEC	MIR4668	hsa-mir-4668	chr9	+	5p	111932103	COSN23024310	seed_5p	4	NA	NA	GA	G	-24.15	-23.1	NA	NA
TCGA-BG-A0LX-01A-11R-A041-13	UCEC	MIR4668	hsa-mir-4668	chr9	+	5p	111932103	COSN23024310	seed_5p	4	NA	NA	GA	G	-24.15	-23.1	NA	NA
TCGA-55-8506-01A-11H-2402-13	LUAD	MIR4668	hsa-mir-4668	chr9	+	5p	111932081	NA	flanking-5	NA	NA	-19	T	TA	-24.15	-24.15	NA	NA
TCGA-BR-4362-01A-01R-1157-13	STAD	MIR4668	hsa-mir-4668	chr9	+	5p	111932103	COSN23024310	seed_5p	4	NA	NA	GA	G	-24.15	-23.1	NA	NA
TCGA-AA-3833-01A-01T-0906-13	COAD	MIR4668	hsa-mir-4668	chr9	+	5p	111932103	COSN23024310	seed_5p	4	NA	NA	GA	G	-24.15	-23.1	NA	NA
TCGA-AP-A0LE-01A-11R-A103-13	UCEC	MIR4668	hsa-mir-4668	chr9	+	5p	111932103	COSN23024310	seed_5p	4	NA	NA	GA	G	-24.15	-23.1	NA	NA
TCGA-D1-A1NZ-01A-21R-A14C-13	UCEC	MIR4668	hsa-mir-4668	chr9	+	5p	111932103	COSN23024310	seed_5p	4	NA	NA	GA	G	-24.15	-23.1	NA	NA
TCGA-BR-8591-01A-11R-2402-13	STAD	MIR4668	hsa-mir-4668	chr9	+	5p	111932103	COSN23024310	seed_5p	4	NA	NA	GA	G	-24.15	-23.1	NA	NA
TCGA-CD-A4MI-01A-21R-A252-13	STAD	MIR4668	hsa-mir-4668	chr9	+	5p	111932103	COSN23024310	seed_5p	4	NA	NA	GA	G	-24.15	-23.1	NA	NA
TCGA-VQ-A924-01A-11R-A415-13	STAD	MIR4668	hsa-mir-4668	chr9	+	5p	111932103	COSN23024310	seed_5p	4	NA	NA	GA	G	-24.15	-23.1	NA	NA
TCGA-HU-A4H3-01A-21R-A252-13	STAD	MIR4668	hsa-mir-4668	chr9	+	5p	111932103	COSN23024310	seed_5p	4	NA	NA	GA	G	-24.15	-23.1	NA	NA
TCGA-AP-A0LG-01A-11R-A041-13	UCEC	MIR4668	hsa-mir-4668	chr9	+	5p	111932103	COSN23024310	seed_5p	4	NA	NA	GA	G	-24.15	-23.1	NA	NA
TCGA-HU-8602-01A-11R-2402-13	STAD	MIR4668	hsa-mir-4668	chr9	+	5p	111932103	COSN23024310	seed_5p	4	NA	NA	GA	G	-24.15	-23.1	NA	NA
TCGA-L5-A8NM-01A-11R-A37J-13	ESCA	MIR4668	hsa-mir-4668	chr9	+	5p	111932103	COSN23024310	seed_5p	4	NA	NA	GA	G	-24.15	-23.1	NA	NA
TCGA-AX-A3G8-01A-11R-A22I-13	UCEC	MIR4668	hsa-mir-4668	chr9	+	5p	111932103	COSN23024310	seed_5p	4	NA	NA	GA	G	-24.15	-23.1	NA	NA
TCGA-B5-A11G-01A-13R-A119-13	UCEC	MIR4668	hsa-mir-4668	chr9	+	5p	111932103	COSN23024310	seed_5p	4	NA	NA	GA	G	-24.15	-23.1	NA	NA
TCGA-BG-A0MQ-01A-11R-A103-13	UCEC	MIR4668	hsa-mir-4668	chr9	+	5p	111932103	COSN23024310	seed_5p	4	NA	NA	GA	G	-24.15	-23.1	NA	NA
TCGA-CD-A4MJ-01A-11R-A252-13	STAD	MIR4668	hsa-mir-4668	chr9	+	5p	111932103	COSN23024310	seed_5p	4	NA	NA	GA	G	-24.15	-23.1	NA	NA
TCGA-EO-A22S-01A-11R-A18L-13	UCEC	MIR4668	hsa-mir-4668	chr9	+	5p	111932103	COSN23024310	seed_5p	4	NA	NA	GA	G	-24.15	-23.1	NA	NA
TCGA-W3-A824-06A-21R-A358-13	SKCM	MIR4668	hsa-mir-4668	chr9	+	5p	111932103	COSN23024310	seed_5p	4	NA	NA	GA	G	-24.15	-23.1	NA	NA
TCGA-A2-A0SY-01A-31R-A085-13	BRCA	MIR4685	hsa-mir-4685	chr10	-	3p	98431270	NA	flanking-3	NA	NA	22	G	A	-46.2	-49.2	NA	NA
TCGA-IR-A3LH-01A-21R-A214-13	CESC	MIR4690	hsa-mir-4690	chr11	+	3p	65636384	NA	flanking-3	NA	NA	16	C	G	-47.3	-48.6	NA	NA
TCGA-CG-4305-01A-01R-1157-13	STAD	MIR4701	hsa-mir-4701	chr12	-	both	48772005	NA	loop	NA	9	NA	G	A	-46.1	-46.1	NA	NA
TCGA-DX-A6YU-01A-12R-A33A-13	SARC	MIR4701	hsa-mir-4701	chr12	-	both	48772050	NA	flanking-5	NA	NA	-15	G	A	-46.1	-45.8	NA	NA
TCGA-SX-A7SL-01A-11R-A359-13	KIRP	MIR4709	hsa-mir-4709	chr14	-	3p	74480111	NA	flanking-3	NA	NA	24	C	A	-43.4	-42.7	NA	NA
TCGA-AJ-A2QO-01A-11R-A18L-13	UCEC	MIR4723	hsa-mir-4723	chr17	+	both	28360702	NA	loop	NA	19	NA	A	G	-43.6	-43.8	NA	NA
TCGA-D1-A0ZO-01A-11R-A119-13	UCEC	MIR4726	hsa-mir-4726	chr17	+	5p	38719772	NA	flanking-3	NA	NA	24	G	A	-51	-51	NA	NA
TCGA-KK-A8I8-01A-11R-A36B-13	PRAD	MIR4726	hsa-mir-4726	chr17	+	5p	38719767	NA	flanking-3	NA	NA	19	TC	T	-51	-50.39	NA	NA
TCGA-EE-A2A2-06A-11R-A18W-13	SKCM	MIR4726	hsa-mir-4726	chr17	+	5p	38719752	NA	flanking-3	NA	NA	4	C	T	-51	-50.3	NA	NA
TCGA-3N-A9WC-06A-11R-A38N-13	SKCM	MIR4726	hsa-mir-4726	chr17	+	5p	38719753	NA	flanking-3	NA	NA	5	C	T	-51	-53.9	NA	NA
TCGA-D6-6516-01A-11R-1872-13	HNSC	MIR4726	hsa-mir-4726	chr17	+	5p	38719752	NA	flanking-3	NA	NA	4	C	T	-51	-50.3	NA	NA
TCGA-61-1911-01A-01R-1567-13	OV	MIR4728	hsa-mir-4728	chr17	+	both	39726473	NA	flanking-5	NA	NA	-23	T	G	-41.8	-42.1	NA	NA
TCGA-AC-A2B8-01A-11R-A17A-13	BRCA	MIR4738	hsa-mir-4738	chr17	-	3p	75784569	COSN23015241	non-seed duplex_5p	20	NA	NA	G	A	-49.03	-46.83	NA	NA
TCGA-D5-6540-01A-11H-1722-13	COAD	MIR4738	hsa-mir-4738	chr17	-	3p	75784592	NA	flanking-5	NA	NA	-4	AAGG	A	-49.03	-45.55	NA	NA
TCGA-CQ-7071-01A-12R-A30I-13	HNSC	MIR4742	hsa-mir-4742	chr1	-	both	224398258	NA	loop	NA	31	NA	C	G	-36.9	-33.9	NA	NA
TCGA-FD-A6TC-01A-21R-A33A-13	BLCA	MIR4742	hsa-mir-4742	chr1	-	both	224398264	NA	loop	NA	25	NA	C	T	-36.9	-37.6	NA	NA
TCGA-HT-7606-01A-11R-2089-13	LGG	MIR4742	hsa-mir-4742	chr1	-	both	224398269	NA	loop	NA	20	NA	C	CA	-36.9	-38	NA	NA
TCGA-BC-A10Q-01A-11R-A130-13	LIHC	MIR4742	hsa-mir-4742	chr1	-	both	224398217	NA	flanking-3	NA	NA	10	A	T	-36.9	-36.9	NA	NA
TCGA-61-2095-01A-01R-1568-13	OV	MIR4743	hsa-mir-4743	chr18	+	5p	48670645	NA	loop	NA	21	NA	G	C	-49.1	-44.7	NA	NA
TCGA-56-8304-01A-11H-2325-13	LUSC	MIR4745	hsa-mir-4745	chr19	+	5p	804967	NA	loop	NA	4	NA	G	T	-50.5	-47.4	NA	NA
TCGA-EB-A44O-01A-11R-A25Z-13	SKCM	MIR4745	hsa-mir-4745	chr19	+	5p	804970	NA	loop	NA	7	NA	C	T	-50.5	-48.7	NA	NA
TCGA-IR-A3LK-01A-12R-A214-13	CESC	MIR4745	hsa-mir-4745	chr19	+	5p	805010	NA	flanking-3	NA	NA	11	C	T	-50.5	-50.5	NA	NA
TCGA-CM-6171-01A-11H-1652-13	COAD	MIR4745	hsa-mir-4745	chr19	+	5p	804930	NA	flanking-5	NA	NA	-11	C	T	-50.5	-47.5	NA	NA
TCGA-D1-A167-01A-11R-A12H-13	UCEC	MIR4745	hsa-mir-4745	chr19	+	5p	805011	COSM1003433	flanking-3	NA	NA	12	A	G	-50.5	-51.2	NA	NA
TCGA-D1-A167-01A-11R-A12H-13	UCEC	MIR4746	hsa-mir-4746	chr19	+	5p	4446056	NA	flanking-3	NA	NA	15	C	T	-46.4	-44.7	NA	NA
TCGA-44-7667-01A-31H-2065-13	LUAD	MIR4746	hsa-mir-4746	chr19	+	5p	4446016	COSN6552656	loop	NA	7	NA	G	A	-46.4	-44.7	NA	NA
TCGA-EB-A5UN-06A-11R-A310-13	SKCM	MIR4746	hsa-mir-4746	chr19	+	5p	4445976	NA	flanking-5	NA	NA	-11	G	A	-46.4	-41	NA	NA
TCGA-EE-A2A1-06A-11R-A18W-13	SKCM	MIR4747	hsa-mir-4747	chr19	+	both	4932681	NA	flanking-5	NA	NA	-6	C	T	-39.4	-38.7	NA	NA
TCGA-CM-6171-01A-11H-1652-13	COAD	MIR4749	hsa-mir-4749	chr19	+	both	49854655	COSM5160145	flanking-3	NA	NA	4	C	T	-46.2	-43.8	NA	NA
TCGA-BR-4361-01A-01R-1157-13	STAD	MIR4749	hsa-mir-4749	chr19	+	both	49854579	NA	flanking-5	NA	NA	-14	T	C	-46.2	-44.8	NA	NA
TCGA-05-4424-01A-22H-1857-13	LUAD	MIR4758	hsa-mir-4758	chr20	-	both	62332521	NA	loop	NA	13	NA	C	A	-54.9	-53	NA	NA
TCGA-F1-6177-01A-11R-1802-13	STAD	MIR4758	hsa-mir-4758	chr20	-	both	62332484	NA	flanking-3	NA	NA	6	TG	T	-54.9	-54.4	NA	NA
TCGA-S5-AA26-01A-11R-A38M-13	BLCA	MIR4758	hsa-mir-4758	chr20	-	both	62332568	NA	flanking-5	NA	NA	-12	G	A	-54.9	-54.9	NA	NA
TCGA-5L-AAT1-01A-12R-A41G-13	BRCA	MIR4781	hsa-mir-4781	chr1	+	3p	54054166	NA	flanking-3	NA	NA	21	G	A	-69.6	-69.6	NA	NA
TCGA-R6-A6XG-01B-11R-A337-13	ESCA	MIR483	hsa-mir-483	chr11	-	both	2134167	NA	loop	NA	14	NA	G	T	-55.3	-57.3	NA	NA
TCGA-35-4123-01A-01T-1108-13	LUAD	MIR483	hsa-mir-483	chr11	-	both	2134127	NA	flanking-3	NA	NA	15	A	G	-55.3	-55.3	NA	NA
TCGA-AB-2830-03A-01T-0736-13	LAML	MIR483	hsa-mir-483	chr11	-	both	2134129	NA	flanking-3	NA	NA	13	G	A	-55.3	-55.1	NA	NA
TCGA-55-5899-01A-11H-1627-13	LUAD	MIR485	hsa-mir-485	chr14	+	both	101055473	COSN1080980	non-seed duplex_3p	10	NA	NA	G	T	-40.4	-34.3	NA	NA
TCGA-HU-A4GN-01A-11R-A252-13	STAD	MIR485	hsa-mir-485	chr14	+	both	101055461	COSN1080981	loop	NA	13	NA	C	T	-40.4	-38.5	NA	NA
TCGA-EE-A2MR-06A-11R-A18V-13	SKCM	MIR487A	hsa-mir-487a	chr14	+	both	101052434	NA	flanking-5	NA	NA	-24	C	T	-35.6	-33.8	NA	NA
TCGA-55-7914-01A-11H-2169-13	LUAD	MIR487A	hsa-mir-487a	chr14	+	both	101052442	NA	flanking-5	NA	NA	-16	C	T	-35.6	-36.4	NA	NA
TCGA-BR-8360-01A-11R-2343-13	STAD	MIR487A	hsa-mir-487a	chr14	+	both	101052492	COSN18738428	loop	NA	13	NA	C	T	-35.6	-33.8	NA	NA
TCGA-EB-A3Y7-01A-11R-A23A-13	SKCM	MIR487A	hsa-mir-487a	chr14	+	both	101052445	NA	flanking-5	NA	NA	-13	C	T	-35.6	-39.7	NA	NA
TCGA-D3-A2JC-06A-11R-A18W-13	SKCM	MIR487B	hsa-mir-487b	chr14	+	3p	101046508	COSN1080990	seed_3p	4	NA	NA	C	T	-41.4	-42.1	NA	NA
TCGA-HR-A2OG-06A-21R-A18X-13	SKCM	MIR487B	hsa-mir-487b	chr14	+	3p	101046508	COSN1080990	seed_3p	4	NA	NA	C	T	-41.4	-42.1	NA	NA
TCGA-BR-4361-01A-01R-1157-13	STAD	MIR487B	hsa-mir-487b	chr14	+	3p	101046456	NA	flanking-5	NA	NA	-13	T	C	-41.4	-40	NA	NA
TCGA-EE-A2GO-06A-11R-A18V-13	SKCM	MIR487B	hsa-mir-487b	chr14	+	3p	101046508	COSN1080990	seed_3p	4	NA	NA	C	T	-41.4	-42.1	NA	NA
TCGA-44-7670-01A-11H-2065-13	LUAD	MIR487B	hsa-mir-487b	chr14	+	3p	101046501	COSN24410132	loop	NA	11	NA	G	C	-41.4	-41.4	NA	NA
TCGA-EB-A4XL-01A-11R-A27U-13	SKCM	MIR487B	hsa-mir-487b	chr14	+	3p	101046508	COSN1080990	seed_3p	4	NA	NA	C	T	-41.4	-42.1	NA	NA
TCGA-ER-A19N-06A-11R-A18V-13	SKCM	MIR487B	hsa-mir-487b	chr14	+	3p	101046451	NA	flanking-5	NA	NA	-18	A	G	-41.4	-41.4	NA	NA
TCGA-EE-A29L-06A-12R-A18V-13	SKCM	MIR487B	hsa-mir-487b	chr14	+	3p	101046489	COSN23024168	non-seed duplex_5p	21	NA	NA	C	T	-41.4	-39.3	NA	NA
TCGA-ER-A19D-06A-11R-A18V-13	SKCM	MIR488	hsa-mir-488	chr1	-	3p	177029436	NA	flanking-5	NA	NA	-4	G	A	-34.5	-31.9	NA	NA
TCGA-D5-6922-01A-11H-1927-13	COAD	MIR489	hsa-mir-489	chr7	-	3p	93483953	COSN18384155	non-seed duplex_3p	16	NA	NA	G	A	-40.5	-38.7	NA	NA
TCGA-DD-AACI-01A-11R-A41H-13	LIHC	MIR489	hsa-mir-489	chr7	-	3p	93483968	COSN18308138	non-seed duplex_3p	1	NA	NA	C	T	-40.5	-40.5	NA	NA
TCGA-ZF-AA4X-01A-11R-A38M-13	BLCA	MIR489	hsa-mir-489	chr7	-	3p	93483980	NA	loop	NA	5	NA	C	A	-40.5	-40.3	NA	NA
TCGA-BR-8679-01A-11R-2402-13	STAD	MIR490	hsa-mir-490	chr7	+	both	136903198	NA	flanking-5	NA	NA	-7	T	G	-43.3	-41.8	NA	NA
TCGA-HT-A617-01A-11R-A29V-13	LGG	MIR490	hsa-mir-490	chr7	+	both	136903201	NA	flanking-5	NA	NA	-4	G	A	-43.3	-43.6	NA	NA
TCGA-CM-5861-01A-01T-1652-13	COAD	MIR490	hsa-mir-490	chr7	+	both	136903230	NA	loop	NA	6	NA	T	G	-43.3	-43.1	NA	NA
TCGA-IR-A3LH-01A-21R-A214-13	CESC	MIR490	hsa-mir-490	chr7	+	both	136903266	COSN16129479	flanking-3	NA	NA	3	G	A	-43.3	-38.7	NA	NA
TCGA-34-2604-01A-01T-1557-13	LUSC	MIR490	hsa-mir-490	chr7	+	both	136903287	NA	flanking-3	NA	NA	24	C	A	-43.3	-43.3	NA	NA
TCGA-CC-A7IF-01A-11R-A33A-13	LIHC	MIR490	hsa-mir-490	chr7	+	both	136903221	COSN16303067	non-seed duplex_5p	17	NA	NA	G	A	-43.3	-43.3	NA	NA
TCGA-QB-AA9O-06A-11R-A39J-13	SKCM	MIR490	hsa-mir-490	chr7	+	both	136903200	COSN212800	flanking-5	NA	NA	-5	C	T	-43.3	-41.1	NA	NA
TCGA-EE-A29S-06A-11R-A18W-13	SKCM	MIR491	hsa-mir-491	chr9	+	5p	20716106	NA	flanking-5	NA	NA	-14	T	G	-52.4	-52.1	NA	NA
TCGA-BH-A0EE-01A-11R-A035-13	BRCA	MIR491	hsa-mir-491	chr9	+	5p	20716151	COSN23017394	loop	NA	10	NA	C	T	-52.4	-50.1	NA	NA
TCGA-O2-A52N-01A-11H-A26V-13	LUSC	MIR493	hsa-mir-493	chr14	+	both	100869113	NA	loop	NA	17	NA	C	A	-53.4	-53.4	NA	NA
TCGA-EE-A2MR-06A-11R-A18V-13	SKCM	MIR493	hsa-mir-493	chr14	+	both	100869113	COSN5026504	loop	NA	17	NA	C	T	-53.4	-54.3	NA	NA
TCGA-46-3767-01A-01T-0981-13	LUSC	MIR493	hsa-mir-493	chr14	+	both	100869102	COSN2378441	loop	NA	6	NA	G	T	-53.4	-53.3	NA	NA
TCGA-04-1646-01A-01R-1567-13	OV	MIR493	hsa-mir-493	chr14	+	both	100869061	NA	flanking-5	NA	NA	-14	TG	T	-53.4	-51.6	NA	NA
TCGA-P3-A6T5-01A-11R-A34O-13	HNSC	MIR493	hsa-mir-493	chr14	+	both	100869102	COSN1081001	loop	NA	6	NA	G	A	-53.4	-53.3	NA	NA
TCGA-EE-A180-06A-11R-A21E-13	SKCM	MIR493	hsa-mir-493	chr14	+	both	100869153	NA	flanking-3	NA	NA	16	C	T	-53.4	-50.9	NA	NA
TCGA-33-4532-01A-01T-1517-13	LUSC	MIR493	hsa-mir-493	chr14	+	both	100869130	COSN2378440	non-seed duplex_3p	15	NA	NA	G	T	-53.4	-47.4	NA	NA
TCGA-EE-A29M-06A-11R-A18W-13	SKCM	MIR493	hsa-mir-493	chr14	+	both	100869097	COSN5026503	loop	NA	1	NA	C	T	-53.4	-53.4	NA	NA
TCGA-D3-A8GQ-06A-11R-A37G-13	SKCM	MIR494	hsa-mir-494	chr14	+	3p	101029657	COSN1080995	non-seed duplex_5p	10	NA	NA	G	A	-36.1	-30.4	NA	NA
TCGA-FJ-A3Z7-01A-12R-A23I-13	BLCA	MIR494	hsa-mir-494	chr14	+	3p	101029633	NA	flanking-5	NA	NA	-15	C	T	-36.1	-38.2	NA	NA
TCGA-33-AAS8-01A-11H-A404-13	LUSC	MIR494	hsa-mir-494	chr14	+	3p	101029725	NA	flanking-3	NA	NA	23	C	A	-36.1	-36.1	NA	NA
TCGA-UY-A78L-01A-12R-A33A-13	BLCA	MIR494	hsa-mir-494	chr14	+	3p	101029633	NA	flanking-5	NA	NA	-15	C	T	-36.1	-38.2	NA	NA
TCGA-DA-A1I0-06A-11R-A20E-13	SKCM	MIR494	hsa-mir-494	chr14	+	3p	101029719	NA	flanking-3	NA	NA	17	C	T	-36.1	-36.1	NA	NA
TCGA-ER-A195-06A-11R-A18X-13	SKCM	MIR494	hsa-mir-494	chr14	+	3p	101029719	NA	flanking-3	NA	NA	17	C	T	-36.1	-36.1	NA	NA
TCGA-XE-AANJ-01A-11R-A43A-13	TGCT	MIR495	hsa-mir-495	chr14	+	3p	101033752	NA	flanking-5	NA	NA	-16	C	T	-35.8	-35.8	NA	NA
TCGA-DA-A1HY-06A-11R-A18W-13	SKCM	MIR495	hsa-mir-495	chr14	+	3p	101033844	NA	flanking-3	NA	NA	19	C	T	-35.8	-35.8	NA	NA
TCGA-T9-A92H-01A-11H-A37P-13	COAD	MIR495	hsa-mir-495	chr14	+	3p	101033802	COSN8139435	loop	NA	13	NA	C	T	-35.8	-35.3	NA	NA
TCGA-94-8491-01A-11H-2325-13	LUSC	MIR495	hsa-mir-495	chr14	+	3p	101033802	COSN8139435	loop	NA	13	NA	C	T	-35.8	-35.3	NA	NA
TCGA-85-7699-01A-11H-2124-13	LUSC	MIR495	hsa-mir-495	chr14	+	3p	101033802	COSN8139435	loop	NA	13	NA	C	T	-35.8	-35.3	NA	NA
TCGA-D3-A2JP-06A-11R-A18V-13	SKCM	MIR495	hsa-mir-495	chr14	+	3p	101033788	COSN2378433	non-seed duplex_5p	21	NA	NA	C	T	-35.8	-33.7	NA	NA
TCGA-D1-A174-01A-11R-A12H-13	UCEC	MIR497	hsa-mir-497	chr17	-	5p	7017924	NA	flanking-3	NA	NA	14	TC	T	-53.6	-51.8	NA	NA
TCGA-D3-A3MR-06A-11R-A21E-13	SKCM	MIR498	hsa-mir-498	chr19	+	both	53674208	NA	flanking-5	NA	NA	-22	G	A	-48.2	-47.9	NA	NA
TCGA-05-4424-01A-22H-1857-13	LUAD	MIR498	hsa-mir-498	chr19	+	both	53674292	COSN24408618	flanking-3	NA	NA	4	C	A	-48.2	-42.2	NA	NA
TCGA-55-8507-01A-11H-2402-13	LUAD	MIR499A	hsa-mir-499a	chr20	+	5p	34990391	NA	flanking-5	NA	NA	-17	C	A	-49.7	-47.8	NA	NA
TCGA-UF-A71E-01A-31R-A34O-13	HNSC	MIR499A	hsa-mir-499a	chr20	+	5p	34990402	NA	flanking-5	NA	NA	-6	C	G	-49.7	-52.8	NA	NA
TCGA-AA-3864-01A-01T-1021-13	COAD	MIR499A	hsa-mir-499a	chr20	+	5p	34990399	NA	flanking-5	NA	NA	-9	G	A	-49.7	-44.1	NA	NA
TCGA-BS-A0UL-01A-11R-A108-13	UCEC	MIR499A	hsa-mir-499a	chr20	+	5p	34990385	NA	flanking-5	NA	NA	-23	C	A	-49.7	-48.4	NA	NA
TCGA-D5-6540-01A-11H-1722-13	COAD	MIR499A	hsa-mir-499a	chr20	+	5p	34990392	NA	flanking-5	NA	NA	-16	C	A	-49.7	-49.7	NA	NA
TCGA-UF-A71E-01A-31R-A34O-13	HNSC	MIR499B	hsa-mir-499b	chr20	-	3p	34990402	NA	flanking-3	NA	NA	4	C	G	-39.5	-39.2	NA	NA
TCGA-D1-A1NZ-01A-21R-A14C-13	UCEC	MIR5006	hsa-mir-5006	chr13	-	3p	41568382	NA	flanking-5	NA	NA	-7	G	C	-49.3	-47	NA	NA
TCGA-BS-A0U8-01A-11R-A103-13	UCEC	MIR5006	hsa-mir-5006	chr13	-	3p	41568281	NA	flanking-3	NA	NA	25	A	G	-49.3	-48.2	NA	NA
TCGA-ER-A19S-06A-11R-A18X-13	SKCM	MIR500A	hsa-mir-500a	chrX	+	3p	50008447	COSN1085194	seed_5p	5	NA	NA	C	T	-39.2	-36.3	NA	NA
TCGA-GK-A6C7-01A-11R-A33A-13	KIRC	MIR500A	hsa-mir-500a	chrX	+	3p	50008524	NA	flanking-3	NA	NA	21	G	T	-39.2	-39.2	NA	NA
TCGA-FR-A3YO-06A-11R-A23A-13	SKCM	MIR500A	hsa-mir-500a	chrX	+	3p	50008523	NA	flanking-3	NA	NA	20	C	T	-39.2	-39.8	NA	NA
TCGA-E6-A1M0-01A-11R-A143-13	UCEC	MIR500A	hsa-mir-500a	chrX	+	3p	50008523	NA	flanking-3	NA	NA	20	C	T	-39.2	-39.8	NA	NA
TCGA-AX-A05S-01A-11R-A00W-13	UCEC	MIR500A	hsa-mir-500a	chrX	+	3p	50008455	COSN503234	non-seed duplex_5p	13	NA	NA	C	A	-39.2	-39.2	NA	NA
TCGA-D8-A1JN-01A-11R-A13P-13	BRCA	MIR500A	hsa-mir-500a	chrX	+	3p	50008509	NA	flanking-3	NA	NA	6	G	A	-39.2	-39.2	NA	NA
TCGA-AA-3833-01A-01T-0906-13	COAD	MIR500A	hsa-mir-500a	chrX	+	3p	50008509	NA	flanking-3	NA	NA	6	G	A	-39.2	-39.2	NA	NA
TCGA-B5-A11N-01A-11R-A119-13	UCEC	MIR500B	hsa-mir-500b	chrX	+	5p	50010761	NA	flanking-3	NA	NA	20	C	T	-43.7	-43.7	NA	NA
TCGA-QF-A5YS-01A-11R-A31S-13	UCEC	MIR500B	hsa-mir-500b	chrX	+	5p	50010761	NA	flanking-3	NA	NA	20	C	T	-43.7	-43.7	NA	NA
TCGA-D1-A16Y-01A-31R-A12H-13	UCEC	MIR500B	hsa-mir-500b	chrX	+	5p	50010761	NA	flanking-3	NA	NA	20	C	T	-43.7	-43.7	NA	NA
TCGA-85-7697-01A-11H-2124-13	LUSC	MIR500B	hsa-mir-500b	chrX	+	5p	50010660	NA	flanking-5	NA	NA	-22	C	G	-43.7	-44.8	NA	NA
TCGA-AA-3877-01A-01T-1021-13	COAD	MIR500B	hsa-mir-500b	chrX	+	5p	50010671	NA	flanking-5	NA	NA	-11	TC	T	-43.7	-41.3	NA	NA
TCGA-52-7622-01A-11H-2124-13	LUSC	MIR501	hsa-mir-501	chrX	+	3p	50009808	NA	flanking-3	NA	NA	15	C	A	-44.4	-49.8	NA	NA
TCGA-49-AARE-01A-11H-A41D-13	LUAD	MIR501	hsa-mir-501	chrX	+	3p	50009815	NA	flanking-3	NA	NA	22	G	A	-44.4	-45	NA	NA
TCGA-FU-A770-01A-11R-A342-13	CESC	MIR5010	hsa-mir-5010	chr17	+	both	42514213	COSN16130765	seed_5p	6	NA	NA	G	A	-50.8	-51.3	NA	NA
TCGA-AJ-A3NE-01A-11R-A22I-13	UCEC	MIR5010	hsa-mir-5010	chr17	+	both	42514259	NA	loop	NA	30	NA	G	A	-50.8	-50.9	NA	NA
TCGA-DD-A1EK-01A-11R-A214-13	LIHC	MIR502	hsa-mir-502	chrX	+	3p	50014594	NA	flanking-5	NA	NA	-19	G	A	-59	-59	NA	NA
TCGA-BR-A4QL-01A-31R-A252-13	STAD	MIR503	hsa-mir-503	chrX	-	5p	134546399	NA	flanking-5	NA	NA	-6	C	T	-58.5	-57.4	NA	NA
TCGA-CK-6746-01A-11H-1838-13	COAD	MIR503	hsa-mir-503	chrX	-	5p	134546417	NA	flanking-5	NA	NA	-24	G	A	-58.5	-56.8	NA	NA
TCGA-44-7670-01A-11H-2065-13	LUAD	MIR503	hsa-mir-503	chrX	-	5p	134546414	NA	flanking-5	NA	NA	-21	AC	A	-58.5	-60.4	NA	NA
TCGA-AX-A05Y-01A-11R-A00W-13	UCEC	MIR503	hsa-mir-503	chrX	-	5p	134546412	NA	flanking-5	NA	NA	-19	G	A	-58.5	-58.5	NA	NA
TCGA-DK-A3IL-01A-11R-A20E-13	BLCA	MIR503	hsa-mir-503	chrX	-	5p	134546404	NA	flanking-5	NA	NA	-11	G	C	-58.5	-56.6	NA	NA
TCGA-13-1481-01A-01R-1565-13	OV	MIR504	hsa-mir-504	chrX	-	5p	138667793	NA	flanking-5	NA	NA	-12	C	A	-54.2	-53	NA	NA
TCGA-MU-A51Y-01A-11R-A26X-13	CESC	MIR505	hsa-mir-505	chrX	-	3p	139924159	COSN16129878	flanking-3	NA	NA	1	G	A	-48.9	-47	NA	NA
TCGA-CD-A4MG-01A-11R-A252-13	STAD	MIR505	hsa-mir-505	chrX	-	3p	139924147	NA	flanking-3	NA	NA	13	C	T	-48.9	-49	NA	NA
TCGA-BG-A0MI-01A-11R-A041-13	UCEC	MIR505	hsa-mir-505	chrX	-	3p	139924225	NA	flanking-5	NA	NA	-8	G	T	-48.9	-48.6	NA	NA
TCGA-EE-A3AD-06A-11R-A18V-13	SKCM	MIR506	hsa-mir-506	chrX	-	3p	147230805	COSN5028508	seed_5p	5	NA	NA	G	A	-30.6	-28.4	NA	NA
TCGA-OR-A5JB-01A-11R-A29W-13	ACC	MIR506	hsa-mir-506	chrX	-	3p	147230824	NA	flanking-5	NA	NA	-15	G	T	-30.6	-30.6	NA	NA
TCGA-BR-8690-01A-11R-2402-13	STAD	MIR506	hsa-mir-506	chrX	-	3p	147230781	NA	loop	NA	7	NA	T	C	-30.6	-30.6	NA	NA
TCGA-BA-5556-01A-01R-1513-13	HNSC	MIR506	hsa-mir-506	chrX	-	3p	147230824	NA	flanking-5	NA	NA	-15	G	T	-30.6	-30.6	NA	NA
TCGA-B5-A11H-01A-11R-A119-13	UCEC	MIR508	hsa-mir-508	chrX	-	3p	147237007	COSN1085051	flanking-5	NA	NA	-5	A	G	-44.5	-43.7	NA	NA
TCGA-S9-A7J2-01A-11R-A34G-13	LGG	MIR508	hsa-mir-508	chrX	-	3p	147236926	NA	flanking-3	NA	NA	19	G	A	-44.5	-44.5	NA	NA
TCGA-AC-A3TN-01A-11R-A22I-13	BRCA	MIR508	hsa-mir-508	chrX	-	3p	147236930	NA	flanking-3	NA	NA	15	C	T	-44.5	-43.6	NA	NA
TCGA-E9-A54X-01A-11R-A25Z-13	BRCA	MIR508	hsa-mir-508	chrX	-	3p	147236982	COSN23017582	non-seed duplex_5p	21	NA	NA	T	C	-44.5	-44.1	NA	NA
TCGA-67-3771-01A-01T-0947-13	LUAD	MIR508	hsa-mir-508	chrX	-	3p	147237002	COSN24409304	non-seed duplex_5p	1	NA	NA	A	G	-44.5	-38.7	NA	NA
TCGA-AA-3692-01A-01T-0906-13	COAD	MIR508	hsa-mir-508	chrX	-	3p	147236931	NA	flanking-3	NA	NA	14	G	A	-44.5	-44.5	NA	NA
TCGA-55-A493-01A-11H-A24G-13	LUAD	MIR5088	hsa-mir-5088	chr19	+	5p	49682169	NA	loop	NA	24	NA	C	T	-50.73	-50.73	NA	NA
TCGA-FD-A5BX-01A-11R-A26X-13	BLCA	MIR5088	hsa-mir-5088	chr19	+	5p	49682101	NA	flanking-5	NA	NA	-21	G	A	-50.73	-48.78	NA	NA
TCGA-K4-A3WU-01B-11R-A23I-13	BLCA	MIR5088	hsa-mir-5088	chr19	+	5p	49682114	NA	flanking-5	NA	NA	-8	G	C	-50.73	-52.6	NA	NA
TCGA-ER-A3PL-06A-11R-A23A-13	SKCM	MIR510	hsa-mir-510	chrX	-	both	147272414	NA	flanking-5	NA	NA	-15	T	C	-41.4	-42.7	NA	NA
TCGA-EE-A20C-06A-11R-A18V-13	SKCM	MIR511	hsa-mir-511	chr10	+	3p	17845147	NA	loop	NA	5	NA	A	T	-34.6	-33.5	NA	NA
TCGA-G2-AA3F-01A-12R-A42V-13	BLCA	MIR511	hsa-mir-511	chr10	+	3p	17845149	NA	loop	NA	7	NA	A	AT	-34.6	-34.1	NA	NA
TCGA-BR-8078-01A-11R-2343-13	STAD	MIR511	hsa-mir-511	chr10	+	3p	17845149	NA	loop	NA	7	NA	AT	A	-34.6	-34.4	NA	NA
TCGA-D5-6540-01A-11H-1722-13	COAD	MIR511	hsa-mir-511	chr10	+	3p	17845111	NA	flanking-5	NA	NA	-11	A	T	-34.6	-34.6	NA	NA
TCGA-63-A5MU-01A-11H-A26V-13	LUSC	MIR511	hsa-mir-511	chr10	+	3p	17845186	NA	flanking-3	NA	NA	7	G	A	-34.6	-31.7	NA	NA
TCGA-AG-A026-01A-32R-A082-13	READ	MIR511	hsa-mir-511	chr10	+	3p	17845149	NA	loop	NA	7	NA	A	AT	-34.6	-34.1	NA	NA
TCGA-29-1762-01A-01R-1567-13	OV	MIR513B	hsa-mir-513b	chrX	-	5p	147199106	COSN519502	non-seed duplex_5p	9	NA	NA	C	A	-37.1	-33.9	NA	NA
TCGA-DA-A95V-06A-11R-A37G-13	SKCM	MIR513C	hsa-mir-513c	chrX	-	both	147189702	NA	flanking-3	NA	NA	15	C	A	-38.3	-37	NA	NA
TCGA-AP-A054-01A-11R-A041-13	UCEC	MIR513C	hsa-mir-513c	chrX	-	both	147189710	NA	flanking-3	NA	NA	7	A	G	-38.3	-33.7	NA	NA
TCGA-B5-A11N-01A-11R-A119-13	UCEC	MIR513C	hsa-mir-513c	chrX	-	both	147189706	NA	flanking-3	NA	NA	11	C	T	-38.3	-36.3	NA	NA
TCGA-ZF-A9RC-01A-11R-A38M-13	BLCA	MIR517A	hsa-mir-517a	chr19	+	3p	53712351	NA	flanking-3	NA	NA	9	G	C	-43.6	-37.4	NA	NA
TCGA-FR-A8YC-06A-11R-A37G-13	SKCM	MIR517A	hsa-mir-517a	chr19	+	3p	53712351	NA	flanking-3	NA	NA	9	G	A	-43.6	-37.4	NA	NA
TCGA-21-5783-01A-41H-2186-13	LUSC	MIR517A	hsa-mir-517a	chr19	+	3p	53712351	NA	flanking-3	NA	NA	9	G	C	-43.6	-37.4	NA	NA
TCGA-BR-8370-01A-11R-2343-13	STAD	MIR517A	hsa-mir-517a	chr19	+	3p	53712260	NA	flanking-5	NA	NA	-22	AAAG	A	-43.6	-43.6	NA	NA
TCGA-EE-A2GH-06A-11R-A18W-13	SKCM	MIR517B	hsa-mir-517b	chr19	+	3p	53721120	COSN2378634	seed_3p	3	NA	NA	C	T	-35	-35	NA	NA
TCGA-EE-A3JD-06A-11R-A20E-13	SKCM	MIR517B	hsa-mir-517b	chr19	+	3p	53721115	NA	loop	NA	13	NA	A	G	-35	-36.5	NA	NA
TCGA-G2-AA3B-01A-11R-A39B-13	BLCA	MIR517B	hsa-mir-517b	chr19	+	3p	53721148	NA	flanking-3	NA	NA	9	G	A	-35	-32.6	NA	NA
TCGA-24-1425-01A-02R-1566-13	OV	MIR517C	hsa-mir-517c	chr19	+	3p	53741348	COSN158478	non-seed duplex_5p	17	NA	NA	C	G	-44.3	-40.8	NA	NA
TCGA-W5-AA39-01A-11R-A41D-13	CHOL	MIR5187	hsa-mir-5187	chr1	+	5p	161227181	NA	flanking-5	NA	NA	-14	G	T	-30.03	-33.2	NA	NA
TCGA-MH-A854-01A-11R-A359-13	KIRP	MIR5187	hsa-mir-5187	chr1	+	5p	161227223	NA	loop	NA	7	NA	A	C	-30.03	-33.03	NA	NA
TCGA-61-2094-01A-01R-1568-13	OV	MIR518C	hsa-mir-518c	chr19	+	both	53708737	NA	flanking-5	NA	NA	-21	GAGA	G	-47.9	-48.8	NA	NA
TCGA-AY-A69D-01A-11H-A37P-13	COAD	MIR518C	hsa-mir-518c	chr19	+	both	53708834	NA	flanking-3	NA	NA	16	G	T	-47.9	-48.4	NA	NA
TCGA-R5-A7ZE-01B-11R-A353-13	STAD	MIR518D	hsa-mir-518d	chr19	+	both	53734958	NA	flanking-3	NA	NA	9	T	C	-45.1	-45.1	NA	NA
TCGA-IG-A3YA-01A-11R-A24L-13	ESCA	MIR518D	hsa-mir-518d	chr19	+	both	53734878	NA	flanking-5	NA	NA	-14	C	A	-45.1	-43	NA	NA
TCGA-EE-A20C-06A-11R-A18V-13	SKCM	MIR518D	hsa-mir-518d	chr19	+	both	53734924	NA	loop	NA	11	NA	G	A	-45.1	-44.4	NA	NA
TCGA-G3-A7M5-01A-11R-A343-13	LIHC	MIR518E	hsa-mir-518e	chr19	+	5p	53729846	NA	flanking-5	NA	NA	-7	T	A	-48.3	-49	NA	NA
TCGA-18-3411-01A-01T-0981-13	LUSC	MIR518E	hsa-mir-518e	chr19	+	5p	53729929	NA	flanking-3	NA	NA	18	G	T	-48.3	-46.9	NA	NA
TCGA-34-2608-01A-02T-1557-13	LUSC	MIR518E	hsa-mir-518e	chr19	+	5p	53729858	COSN2378632	seed_5p	6	NA	NA	G	T	-48.3	-46.4	NA	NA
TCGA-55-1595-01A-01T-0947-13	LUAD	MIR518E	hsa-mir-518e	chr19	+	5p	53729836	NA	flanking-5	NA	NA	-17	G	A	-48.3	-48.3	NA	NA
TCGA-AD-6895-01A-11H-1927-13	COAD	MIR518E	hsa-mir-518e	chr19	+	5p	53729915	NA	flanking-3	NA	NA	4	A	G	-48.3	-48.1	NA	NA
TCGA-96-8170-01A-11H-2295-13	LUSC	MIR518E	hsa-mir-518e	chr19	+	5p	53729858	COSN2378632	seed_5p	6	NA	NA	G	T	-48.3	-46.4	NA	NA
TCGA-22-5479-01A-31H-1948-13	LUSC	MIR518F	hsa-mir-518f	chr19	+	both	53700097	NA	flanking-3	NA	NA	10	T	C	-43.4	-41.1	NA	NA
TCGA-EB-A431-01A-11R-A25Z-13	SKCM	MIR518F	hsa-mir-518f	chr19	+	both	53700062	COSN1082501	loop	NA	11	NA	G	T	-43.4	-44	NA	NA
TCGA-C5-A1BK-01B-11R-A13X-13	CESC	MIR5196	hsa-mir-5196	chr19	+	3p	35345621	NA	flanking-3	NA	NA	20	C	G	-50.5	-48	NA	NA
TCGA-18-3411-01A-01T-0981-13	LUSC	MIR519B	hsa-mir-519b	chr19	+	both	53695250	COSN2378637	loop	NA	4	NA	T	C	-44.1	-42.3	NA	NA
TCGA-56-7730-01A-11H-2124-13	LUSC	MIR519B	hsa-mir-519b	chr19	+	both	53695208	NA	flanking-5	NA	NA	-17	G	T	-44.1	-44.1	NA	NA
TCGA-HU-8604-01A-11R-2402-13	STAD	MIR519B	hsa-mir-519b	chr19	+	both	53695204	NA	flanking-5	NA	NA	-21	A	G	-44.1	-44.1	NA	NA
TCGA-VQ-A91E-01A-31R-A415-13	STAD	MIR519B	hsa-mir-519b	chr19	+	both	53695307	NA	flanking-3	NA	NA	23	T	C	-44.1	-45.3	NA	NA
TCGA-BA-4078-01A-01T-1435-13	HNSC	MIR519B	hsa-mir-519b	chr19	+	both	53695201	NA	flanking-5	NA	NA	-24	G	A	-44.1	-44.1	NA	NA
TCGA-NC-A5HQ-01A-11H-A26V-13	LUSC	MIR519B	hsa-mir-519b	chr19	+	both	53695212	NA	flanking-5	NA	NA	-13	C	T	-44.1	-44.9	NA	NA
TCGA-QK-A8Z8-01A-11R-A39B-13	HNSC	MIR519C	hsa-mir-519c	chr19	+	both	53686464	NA	flanking-5	NA	NA	-20	G	A	-46.3	-46.3	NA	NA
TCGA-25-2397-01A-01R-1569-13	OV	MIR519C	hsa-mir-519c	chr19	+	both	53686466	NA	flanking-5	NA	NA	-18	A	C	-46.3	-46.3	NA	NA
TCGA-XU-A92U-01A-11R-A42W-13	THYM	MIR519E	hsa-mir-519e	chr19	+	3p	53679977	NA	loop	NA	3	NA	T	C	-38.9	-36.3	NA	NA
TCGA-DK-A6AV-01A-12R-A30J-13	BLCA	MIR520A	hsa-mir-520a	chr19	+	both	53690974	NA	flanking-3	NA	NA	20	C	T	-51	-51.5	NA	NA
TCGA-W3-AA1R-06A-11R-A39J-13	SKCM	MIR520A	hsa-mir-520a	chr19	+	both	53690960	NA	flanking-3	NA	NA	6	T	C	-51	-53.5	NA	NA
TCGA-EE-A2MK-06A-11R-A18V-13	SKCM	MIR520A	hsa-mir-520a	chr19	+	both	53690903	COSN5028196	non-seed duplex_5p	9	NA	NA	G	A	-51	-44.1	NA	NA
TCGA-EE-A2GO-06A-11R-A18V-13	SKCM	MIR520A	hsa-mir-520a	chr19	+	both	53690948	COSN5028198	non-seed duplex_3p	16	NA	NA	G	A	-51	-44.5	NA	NA
TCGA-3N-A9WC-06A-11R-A38N-13	SKCM	MIR520A	hsa-mir-520a	chr19	+	both	53690904	COSN2532241	non-seed duplex_5p	10	NA	NA	G	A	-51	-44.2	NA	NA
TCGA-ER-A194-01A-11R-A18X-13	SKCM	MIR520A	hsa-mir-520a	chr19	+	both	53690943	COSN5028197	non-seed duplex_3p	11	NA	NA	C	T	-51	-48	NA	NA
TCGA-55-A490-01A-11H-A24G-13	LUAD	MIR520A	hsa-mir-520a	chr19	+	both	53690881	NA	flanking-5	NA	NA	-14	C	G	-51	-47.6	NA	NA
TCGA-77-8144-01A-11H-2246-13	LUSC	MIR520B	hsa-mir-520b	chr19	+	5p	53701220	NA	flanking-5	NA	NA	-8	G	A	-42.8	-41.9	NA	NA
TCGA-FJ-A3ZE-01A-11R-A23I-13	BLCA	MIR520B	hsa-mir-520b	chr19	+	5p	53701221	NA	flanking-5	NA	NA	-7	C	G	-42.8	-40	NA	NA
TCGA-T9-A92H-01A-11H-A37P-13	COAD	MIR520B	hsa-mir-520b	chr19	+	5p	53701299	NA	flanking-3	NA	NA	12	G	T	-42.8	-42.8	NA	NA
TCGA-94-A5I4-01A-11H-A26V-13	LUSC	MIR520C	hsa-mir-520c	chr19	+	3p	53707499	NA	loop	NA	10	NA	A	G	-52.4	-52.5	NA	NA
TCGA-23-1032-01A-02R-1564-13	OV	MIR520C	hsa-mir-520c	chr19	+	3p	53707503	NA	loop	NA	14	NA	A	G	-52.4	-51.7	NA	NA
TCGA-37-A5EL-01A-11H-A26V-13	LUSC	MIR520C	hsa-mir-520c	chr19	+	3p	53707445	NA	flanking-5	NA	NA	-23	C	A	-52.4	-52.4	NA	NA
TCGA-50-5930-01A-11H-1754-13	LUAD	MIR520C	hsa-mir-520c	chr19	+	3p	53707476	COSN24410708	non-seed duplex_5p	9	NA	NA	G	A	-52.4	-45.9	NA	NA
TCGA-B6-A1KF-01A-11R-A13P-13	BRCA	MIR520C	hsa-mir-520c	chr19	+	3p	53707450	NA	flanking-5	NA	NA	-18	A	T	-52.4	-52.4	NA	NA
TCGA-A6-6651-01A-21H-1838-13	COAD	MIR520D	hsa-mir-520d	chr19	+	both	53720191	NA	flanking-3	NA	NA	21	G	A	-45.6	-45.6	NA	NA
TCGA-DX-A8BP-01A-11R-A37H-13	SARC	MIR520D	hsa-mir-520d	chr19	+	both	53720194	NA	flanking-3	NA	NA	24	G	T	-45.6	-45.6	NA	NA
TCGA-ER-A198-06A-11R-A18W-13	SKCM	MIR520D	hsa-mir-520d	chr19	+	both	53720135	NA	loop	NA	5	NA	G	T	-45.6	-45.8	NA	NA
TCGA-IH-A3EA-01A-11R-A20E-13	SKCM	MIR520E	hsa-mir-520e	chr19	+	3p	53675734	COSN5028191	non-seed duplex_5p	9	NA	NA	G	A	-49	-46	NA	NA
TCGA-BA-5152-01A-02R-1872-13	HNSC	MIR520G	hsa-mir-520g	chr19	+	3p	53722253	NA	flanking-3	NA	NA	10	G	A	-42.7	-35.8	NA	NA
TCGA-D9-A4Z6-06A-12R-A25Z-13	SKCM	MIR520G	hsa-mir-520g	chr19	+	3p	53722217	COSN5028205	loop	NA	13	NA	A	T	-42.7	-46.2	NA	NA
TCGA-EE-A3AH-06A-11R-A18V-13	SKCM	MIR520G	hsa-mir-520g	chr19	+	3p	53722179	COSN5028204	flanking-5	NA	NA	-3	C	T	-42.7	-41.5	NA	NA
TCGA-20-0991-01A-01R-1564-13	OV	MIR522	hsa-mir-522	chr19	+	3p	53751223	NA	flanking-5	NA	NA	-3	T	A	-37.7	-42.7	NA	NA
TCGA-D3-A1Q4-06A-11R-A18W-13	SKCM	MIR522	hsa-mir-522	chr19	+	3p	53751225	COSN23022570	flanking-5	NA	NA	-1	C	T	-37.7	-38.4	NA	NA
TCGA-E2-A158-01A-11R-A12C-13	BRCA	MIR522	hsa-mir-522	chr19	+	3p	53751275	COSN23015440	non-seed duplex_3p	12	NA	NA	C	G	-37.7	-33.3	NA	NA
TCGA-GF-A4EO-06A-12R-A24Y-13	SKCM	MIR522	hsa-mir-522	chr19	+	3p	53751274	COSN23023633	non-seed duplex_3p	11	NA	NA	C	T	-37.7	-34.7	NA	NA
TCGA-D8-A1Y1-01A-21R-A14L-13	BRCA	MIR522	hsa-mir-522	chr19	+	3p	53751288	NA	flanking-3	NA	NA	3	C	T	-37.7	-37	NA	NA
TCGA-D7-6815-01A-11R-1884-13	STAD	MIR522	hsa-mir-522	chr19	+	3p	53751289	COSN24410699	flanking-3	NA	NA	4	G	A	-37.7	-38.3	NA	NA
TCGA-E6-A1M0-01A-11R-A143-13	UCEC	MIR522	hsa-mir-522	chr19	+	3p	53751258	NA	loop	NA	11	NA	G	T	-37.7	-37.6	NA	NA
TCGA-58-A46M-01A-11H-A24G-13	LUSC	MIR522	hsa-mir-522	chr19	+	3p	53751222	NA	flanking-5	NA	NA	-4	G	T	-37.7	-36.4	NA	NA
TCGA-60-2703-01A-11H-2044-13	LUSC	MIR522	hsa-mir-522	chr19	+	3p	53751206	NA	flanking-5	NA	NA	-20	G	A	-37.7	-37.7	NA	NA
TCGA-AN-A0XW-01A-11R-A108-13	BRCA	MIR522	hsa-mir-522	chr19	+	3p	53751294	NA	flanking-3	NA	NA	9	G	C	-37.7	-33.6	NA	NA
TCGA-NC-A5HD-01A-11H-A26V-13	LUSC	MIR522	hsa-mir-522	chr19	+	3p	53751213	NA	flanking-5	NA	NA	-13	TC	T	-37.7	-34.3	NA	NA
TCGA-FR-A7U9-06A-11R-A358-13	SKCM	MIR523	hsa-mir-523	chr19	+	5p	53698472	NA	flanking-3	NA	NA	13	A	G	-51.4	-52.5	NA	NA
TCGA-AO-A124-01A-11R-A10I-13	BRCA	MIR523	hsa-mir-523	chr19	+	5p	53698477	NA	flanking-3	NA	NA	18	A	T	-51.4	-53.9	NA	NA
TCGA-95-7039-01A-11H-1948-13	LUAD	MIR523	hsa-mir-523	chr19	+	5p	53698402	COSN24410711	seed_5p	3	NA	NA	C	A	-51.4	-45.8	NA	NA
TCGA-C5-A7X5-01A-11R-A36A-13	CESC	MIR523	hsa-mir-523	chr19	+	5p	53698475	NA	flanking-3	NA	NA	16	G	A	-51.4	-51.4	NA	NA
TCGA-EE-A181-06A-11R-A18V-13	SKCM	MIR523	hsa-mir-523	chr19	+	5p	53698432	NA	loop	NA	11	NA	G	A	-51.4	-49.6	NA	NA
TCGA-EE-A2GP-06A-11R-A18V-13	SKCM	MIR524	hsa-mir-524	chr19	+	both	53711049	NA	loop	NA	11	NA	G	A	-48.4	-46.7	NA	NA
TCGA-DA-A95X-06A-11R-A37G-13	SKCM	MIR524	hsa-mir-524	chr19	+	both	53711049	NA	loop	NA	11	NA	G	A	-48.4	-46.7	NA	NA
TCGA-FR-A8YC-06A-11R-A37G-13	SKCM	MIR524	hsa-mir-524	chr19	+	both	53711049	NA	loop	NA	11	NA	G	A	-48.4	-46.7	NA	NA
TCGA-W3-AA21-06A-11R-A38N-13	SKCM	MIR524	hsa-mir-524	chr19	+	both	53711049	NA	loop	NA	11	NA	G	A	-48.4	-46.7	NA	NA
TCGA-D3-A51T-06A-11R-A25Z-13	SKCM	MIR525	hsa-mir-525	chr19	+	both	53697530	NA	flanking-5	NA	NA	-17	G	A	-41.7	-41.7	NA	NA
TCGA-58-8386-01A-11H-2295-13	LUSC	MIR525	hsa-mir-525	chr19	+	both	53697614	NA	flanking-3	NA	NA	9	TG	T	-41.7	-37.8	NA	NA
TCGA-FI-A2D6-01A-11R-A17A-13	UCEC	MIR525	hsa-mir-525	chr19	+	both	53697575	COSN23015431	loop	NA	8	NA	GA	G	-41.7	-42.5	NA	NA
TCGA-L5-A43I-01A-11R-A24L-13	ESCA	MIR525	hsa-mir-525	chr19	+	both	53697575	COSN23015431	loop	NA	8	NA	GA	G	-41.7	-42.5	NA	NA
TCGA-HM-A4S6-01A-11R-A26X-13	CESC	MIR526B	hsa-mir-526b	chr19	+	3p	53694386	NA	flanking-5	NA	NA	-20	G	C	-46.7	-46.7	NA	NA
TCGA-EE-A29H-06A-12R-A18V-13	SKCM	MIR526B	hsa-mir-526b	chr19	+	3p	53694472	NA	flanking-3	NA	NA	8	C	T	-46.7	-44.2	NA	NA
TCGA-ER-A199-06A-11R-A18W-13	SKCM	MIR526B	hsa-mir-526b	chr19	+	3p	53694438	NA	loop	NA	10	NA	G	A	-46.7	-47.4	NA	NA
TCGA-GU-A767-01A-11R-A32J-13	BLCA	MIR526B	hsa-mir-526b	chr19	+	3p	53694397	NA	flanking-5	NA	NA	-9	G	T	-46.7	-42.5	NA	NA
TCGA-21-1079-01A-01T-1557-13	LUSC	MIR526B	hsa-mir-526b	chr19	+	3p	53694478	NA	flanking-3	NA	NA	14	A	G	-46.7	-46.7	NA	NA
TCGA-BH-A0E9-01B-11R-A114-13	BRCA	MIR532	hsa-mir-532	chrX	+	5p	50003149	NA	flanking-5	NA	NA	-18	G	T	-31	-30.9	NA	NA
TCGA-5M-AAT6-01A-11H-A41D-13	COAD	MIR532	hsa-mir-532	chrX	+	5p	50003232	NA	flanking-3	NA	NA	7	C	T	-31	-31	NA	NA
TCGA-G2-A2ES-01A-11R-A17X-13	BLCA	MIR532	hsa-mir-532	chrX	+	5p	50003192	COSN514219	loop	NA	4	NA	C	T	-31	-34	NA	NA
TCGA-AO-A03T-01A-21R-A035-13	BRCA	MIR532	hsa-mir-532	chrX	+	5p	50003161	COSN23017652	flanking-5	NA	NA	-6	C	G	-31	-30.4	NA	NA
TCGA-DQ-5625-01A-01R-1872-13	HNSC	MIR539	hsa-mir-539	chr14	+	both	101047320	NA	flanking-5	NA	NA	-9	C	T	-37.2	-37.2	NA	NA
TCGA-FU-A3HZ-01A-11R-A214-13	CESC	MIR539	hsa-mir-539	chr14	+	both	101047341	COSN16130627	non-seed duplex_5p	13	NA	NA	C	T	-37.2	-34.5	NA	NA
TCGA-P3-A5Q5-01A-11R-A28Z-13	HNSC	MIR539	hsa-mir-539	chr14	+	both	101047399	NA	flanking-3	NA	NA	9	C	G	-37.2	-43.4	NA	NA
TCGA-GN-A9SD-06A-11R-A404-13	SKCM	MIR539	hsa-mir-539	chr14	+	both	101047320	NA	flanking-5	NA	NA	-9	C	T	-37.2	-37.2	NA	NA
TCGA-BS-A0TC-01A-11R-A103-13	UCEC	MIR539	hsa-mir-539	chr14	+	both	101047387	COSN1080989	non-seed duplex_3p	19	NA	NA	C	A	-37.2	-31	NA	NA
TCGA-CW-6090-01A-11R-1671-13	KIRC	MIR539	hsa-mir-539	chr14	+	both	101047311	NA	flanking-5	NA	NA	-18	C	T	-37.2	-35.6	NA	NA
TCGA-AX-A2HG-01A-11R-A17A-13	UCEC	MIR539	hsa-mir-539	chr14	+	both	101047411	NA	flanking-3	NA	NA	21	C	T	-37.2	-35.3	NA	NA
TCGA-D3-A3ML-06A-11R-A21E-13	SKCM	MIR539	hsa-mir-539	chr14	+	both	101047320	NA	flanking-5	NA	NA	-9	C	T	-37.2	-37.2	NA	NA
TCGA-DX-A7EU-01A-22R-A36A-13	SARC	MIR541	hsa-mir-541	chr14	+	both	101064588	NA	flanking-3	NA	NA	19	G	A	-39.7	-39.7	NA	NA
TCGA-CR-6477-01A-11R-1872-13	HNSC	MIR541	hsa-mir-541	chr14	+	both	101064505	COSN24410128	seed_5p	2	NA	NA	A	G	-39.7	-39.7	NA	NA
TCGA-EI-6506-01A-11H-1735-13	READ	MIR541	hsa-mir-541	chr14	+	both	101064588	NA	flanking-3	NA	NA	19	G	A	-39.7	-39.7	NA	NA
TCGA-21-5786-01A-01T-1634-13	LUSC	MIR541	hsa-mir-541	chr14	+	both	101064483	NA	flanking-5	NA	NA	-21	G	T	-39.7	-39.7	NA	NA
TCGA-69-7980-01A-11H-2186-13	LUAD	MIR541	hsa-mir-541	chr14	+	both	101064486	NA	flanking-5	NA	NA	-18	C	A	-39.7	-39.7	NA	NA
TCGA-EE-A2MD-06A-11R-A18W-13	SKCM	MIR541	hsa-mir-541	chr14	+	both	101064584	NA	flanking-3	NA	NA	15	C	T	-39.7	-38.8	NA	NA
TCGA-XF-AAN5-01A-11R-A42V-13	BLCA	MIR541	hsa-mir-541	chr14	+	both	101064541	NA	loop	NA	13	NA	G	A	-39.7	-39.7	NA	NA
TCGA-85-A4CN-01A-11H-A24G-13	LUSC	MIR542	hsa-mir-542	chrX	-	3p	134541430	NA	flanking-5	NA	NA	-8	G	T	-41.2	-35.9	NA	NA
TCGA-38-4631-01A-01T-1754-13	LUAD	MIR545	hsa-mir-545	chrX	-	both	74287106	NA	flanking-3	NA	NA	20	T	A	-39.4	-38.7	NA	NA
TCGA-BG-A0VX-01A-11R-A119-13	UCEC	MIR545	hsa-mir-545	chrX	-	both	74287200	NA	flanking-5	NA	NA	-15	C	T	-39.4	-39.1	NA	NA
TCGA-EK-A2RA-01A-11R-A18L-13	CESC	MIR548B	hsa-mir-548b	chr6	-	both	119069063	COSN16131574	non-seed duplex_3p	21	NA	NA	C	A	-48.6	-42.3	NA	NA
TCGA-DD-A3A9-01A-11R-A25Z-13	LIHC	MIR548B	hsa-mir-548b	chr6	-	both	119069078	COSN16303105	seed_3p	6	NA	NA	T	G	-48.6	-46.5	NA	NA
TCGA-XF-A9T0-01A-11R-A39B-13	BLCA	MIR548J	hsa-mir-548j	chr22	-	5p	26555265	NA	loop	NA	9	NA	G	A	-52.7	-53.7	NA	NA
TCGA-CQ-A4C6-01A-11R-A25B-13	HNSC	MIR548J	hsa-mir-548j	chr22	-	5p	26555265	NA	loop	NA	9	NA	G	A	-52.7	-53.7	NA	NA
TCGA-EE-A3AG-06A-31R-A18V-13	SKCM	MIR548J	hsa-mir-548j	chr22	-	5p	26555317	NA	flanking-5	NA	NA	-22	G	A	-52.7	-53.1	NA	NA
TCGA-G4-6320-01A-11H-1722-13	COAD	MIR548J	hsa-mir-548j	chr22	-	5p	26555222	NA	flanking-3	NA	NA	17	C	T	-52.7	-53.1	NA	NA
TCGA-AA-3864-01A-01T-1021-13	COAD	MIR549A	hsa-mir-549a	chr15	-	3p	80841971	NA	flanking-3	NA	NA	22	G	A	-56.2	-56.2	NA	NA
TCGA-85-7697-01A-11H-2124-13	LUSC	MIR551B	hsa-mir-551b	chr3	+	3p	168551904	NA	loop	NA	8	NA	G	A	-43.3	-43.3	NA	NA
TCGA-CG-4437-01A-01R-1802-13	STAD	MIR551B	hsa-mir-551b	chr3	+	3p	168551908	COSN23023266	loop	NA	12	NA	G	A	-43.3	-44	NA	NA
TCGA-55-A48X-01A-11H-A24G-13	LUAD	MIR551B	hsa-mir-551b	chr3	+	3p	168551937	NA	flanking-3	NA	NA	3	G	T	-43.3	-37.7	NA	NA
TCGA-44-5644-01A-21H-2038-13	LUAD	MIR551B	hsa-mir-551b	chr3	+	3p	168551903	COSN24411175	loop	NA	7	NA	A	C	-43.3	-43.3	NA	NA
TCGA-92-8063-01A-11H-2246-13	LUSC	MIR551B	hsa-mir-551b	chr3	+	3p	168551952	NA	flanking-3	NA	NA	18	GC	G	-43.3	-42.7	NA	NA
TCGA-AD-6889-01A-11H-1927-13	COAD	MIR556	hsa-mir-556	chr1	+	both	162342618	COSN23012510	non-seed duplex_3p	19	NA	NA	C	CT	-39.6	-35.8	NA	NA
TCGA-E9-A1NE-01A-21R-A14L-13	BRCA	MIR5582	hsa-mir-5582	chr11	-	3p	46753122	NA	flanking-3	NA	NA	3	C	T	-50.1	-44.1	NA	NA
TCGA-RU-A8FL-01A-11H-A37P-13	COAD	MIR561	hsa-mir-561	chr2	+	5p	188297493	NA	flanking-5	NA	NA	-24	T	G	-67.2	-71	NA	NA
TCGA-EE-A3JD-06A-11R-A20E-13	SKCM	MIR561	hsa-mir-561	chr2	+	5p	188297498	NA	flanking-5	NA	NA	-19	C	T	-67.2	-64.3	NA	NA
TCGA-CF-A5U8-01A-11R-A28I-13	BLCA	MIR570	hsa-mir-570	chr3	+	both	195699416	NA	flanking-5	NA	NA	-9	G	T	-43.1	-36.6	NA	NA
TCGA-AC-A3QP-01A-11R-A22V-13	BRCA	MIR579	hsa-mir-579	chr5	-	both	32394367	NA	flanking-3	NA	NA	25	G	C	-53.5	-53.5	NA	NA
TCGA-A5-A0VP-01A-21R-A103-13	UCEC	MIR579	hsa-mir-579	chr5	-	both	32394431	COSN1083820	non-seed duplex_5p	21	NA	NA	G	A	-53.5	-53.8	NA	NA
TCGA-BR-A4J5-01A-21R-A252-13	STAD	MIR582	hsa-mir-582	chr5	-	5p	59703656	NA	loop	NA	10	NA	T	A	-44	-44	NA	NA
TCGA-AA-3509-01A-01T-1409-13	COAD	MIR582	hsa-mir-582	chr5	-	5p	59703625	COSN18166678	flanking-3	NA	NA	5	C	G	-44	-38.7	NA	NA
TCGA-22-1012-01A-01T-1557-13	LUSC	MIR585	hsa-mir-585	chr5	-	3p	169263656	COSN24388126	non-seed duplex_5p	15	NA	NA	G	A	-61.8	-60	NA	NA
TCGA-NC-A5HP-01A-11H-A26V-13	LUSC	MIR585	hsa-mir-585	chr5	-	3p	169263686	NA	flanking-5	NA	NA	-16	G	T	-61.8	-61.8	NA	NA
TCGA-D8-A1JK-01A-11R-A13P-13	BRCA	MIR589	hsa-mir-589	chr7	-	5p	5495844	COSN23017036	non-seed duplex_3p	14	NA	NA	G	C	-41.3	-42.2	NA	NA
TCGA-HP-A5MZ-01A-21R-A27R-13	LIHC	MIR590	hsa-mir-590	chr7	+	both	74191195	NA	flanking-5	NA	NA	-18	C	T	-36.9	-34.7	NA	NA
TCGA-Z6-A8JE-01A-11R-A37J-13	ESCA	MIR590	hsa-mir-590	chr7	+	both	74191194	NA	flanking-5	NA	NA	-19	C	T	-36.9	-39.1	NA	NA
TCGA-24-1426-01A-01R-1565-13	OV	MIR590	hsa-mir-590	chr7	+	both	74191199	NA	flanking-5	NA	NA	-14	A	T	-36.9	-39.5	NA	NA
TCGA-FS-A4F0-06A-11R-A24Y-13	SKCM	MIR598	hsa-mir-598	chr8	-	3p	11035250	NA	loop	NA	7	NA	A	G	-43.1	-44.9	NA	NA
TCGA-FR-A8YC-06A-11R-A37G-13	SKCM	MIR598	hsa-mir-598	chr8	-	3p	11035210	NA	flanking-3	NA	NA	11	G	A	-43.1	-42.9	NA	NA
TCGA-77-A5G6-01A-11H-A27R-13	LUSC	MIR598	hsa-mir-598	chr8	-	3p	11035292	NA	flanking-5	NA	NA	-13	C	A	-43.1	-43	NA	NA
TCGA-VQ-A91K-01A-11R-A415-13	STAD	MIR598	hsa-mir-598	chr8	-	3p	11035291	NA	flanking-5	NA	NA	-12	G	T	-43.1	-46.1	NA	NA
TCGA-BR-4368-01A-01R-1157-13	STAD	MIR598	hsa-mir-598	chr8	-	3p	11035209	NA	flanking-3	NA	NA	12	G	A	-43.1	-43.8	NA	NA
TCGA-D1-A0ZQ-01A-11R-A119-13	UCEC	MIR619	hsa-mir-619	chr12	-	5p	108837005	NA	flanking-5	NA	NA	-22	C	T	-34.7	-34.7	NA	NA
TCGA-C5-A8XH-01A-11R-A37P-13	CESC	MIR624	hsa-mir-624	chr14	-	both	31014652	NA	flanking-3	NA	NA	17	G	T	-60.5	-60.5	NA	NA
TCGA-YT-A95F-01A-11R-A42W-13	THYM	MIR624	hsa-mir-624	chr14	-	both	31014652	NA	flanking-3	NA	NA	17	G	T	-60.5	-60.5	NA	NA
TCGA-IG-A3YA-01A-11R-A24L-13	ESCA	MIR624	hsa-mir-624	chr14	-	both	31014652	NA	flanking-3	NA	NA	17	G	T	-60.5	-60.5	NA	NA
TCGA-C8-A26Z-01A-11R-A16E-13	BRCA	MIR624	hsa-mir-624	chr14	-	both	31014652	NA	flanking-3	NA	NA	17	G	T	-60.5	-60.5	NA	NA
TCGA-C5-A3HE-01A-21R-A22V-13	CESC	MIR624	hsa-mir-624	chr14	-	both	31014749	NA	flanking-5	NA	NA	-22	T	A	-60.5	-59.5	NA	NA
TCGA-L5-A4OH-01A-11R-A261-13	ESCA	MIR624	hsa-mir-624	chr14	-	both	31014652	NA	flanking-3	NA	NA	17	G	T	-60.5	-60.5	NA	NA
TCGA-A2-A25A-01A-12R-A16E-13	BRCA	MIR624	hsa-mir-624	chr14	-	both	31014652	NA	flanking-3	NA	NA	17	G	T	-60.5	-60.5	NA	NA
TCGA-DX-A48L-01A-11R-A30J-13	SARC	MIR624	hsa-mir-624	chr14	-	both	31014652	NA	flanking-3	NA	NA	17	G	T	-60.5	-60.5	NA	NA
TCGA-78-7166-01A-12H-2065-13	LUAD	MIR629	hsa-mir-629	chr15	-	5p	70079457	NA	flanking-5	NA	NA	-10	C	A	-74.8	-70.3	NA	NA
TCGA-BC-A5W4-01A-11R-A28Z-13	LIHC	MIR629	hsa-mir-629	chr15	-	5p	70079371	NA	flanking-3	NA	NA	16	C	A	-74.8	-74.8	NA	NA
TCGA-AM-5821-01A-01T-1652-13	COAD	MIR642A	hsa-mir-642a	chr19	+	both	45674968	NA	loop	NA	4	NA	TG	T	-67.4	-68.2	NA	NA
TCGA-BS-A0U8-01A-11R-A103-13	UCEC	MIR6501	hsa-mir-6501	chr21	+	both	33550743	NA	flanking-3	NA	NA	16	C	T	-47.33	-47.33	NA	NA
TCGA-HU-A4GX-01A-12R-A252-13	STAD	MIR6501	hsa-mir-6501	chr21	+	both	33550744	NA	flanking-3	NA	NA	17	G	A	-47.33	-47.33	NA	NA
TCGA-A5-A0G3-01A-11R-A041-13	UCEC	MIR6505	hsa-mir-6505	chr12	+	5p	48132836	NA	loop	NA	15	NA	C	A	-32.2	-32.2	NA	NA
TCGA-13-0888-01A-01R-1564-13	OV	MIR6505	hsa-mir-6505	chr12	+	5p	48132836	NA	loop	NA	15	NA	C	A	-32.2	-32.2	NA	NA
TCGA-C5-A1BQ-01C-11R-A214-13	CESC	MIR6505	hsa-mir-6505	chr12	+	5p	48132876	NA	flanking-3	NA	NA	9	G	A	-32.2	-32.1	NA	NA
TCGA-DM-A1HB-01A-21H-A17X-13	COAD	MIR6505	hsa-mir-6505	chr12	+	5p	48132779	NA	flanking-5	NA	NA	-21	T	C	-32.2	-33	NA	NA
TCGA-63-7020-01A-11H-1948-13	LUSC	MIR6506	hsa-mir-6506	chr16	-	5p	15611051	COSM3506246	seed_3p	2	NA	NA	G	A	-27	-25.9	NA	NA
TCGA-F1-6874-01A-11R-1884-13	STAD	MIR6509	hsa-mir-6509	chr7	-	both	135207073	NA	flanking-5	NA	NA	-9	CA	C	-50	-47.7	NA	NA
TCGA-EA-A3HS-01A-11R-A214-13	CESC	MIR6509	hsa-mir-6509	chr7	-	both	135207067	NA	flanking-5	NA	NA	-3	C	T	-50	-46.6	NA	NA
TCGA-BK-A0C9-01A-11R-A00W-13	UCEC	MIR6509	hsa-mir-6509	chr7	-	both	135207067	NA	flanking-5	NA	NA	-3	C	T	-50	-46.6	NA	NA
TCGA-CN-A497-01A-11R-A24J-13	HNSC	MIR6510	hsa-mir-6510	chr17	-	3p	41517236	NA	flanking-5	NA	NA	-21	GC	G	-36.33	-36.4	NA	NA
TCGA-80-5611-01A-01T-1627-13	LUAD	MIR6510	hsa-mir-6510	chr17	-	3p	41517144	NA	flanking-3	NA	NA	22	T	G	-36.33	-37.9	NA	NA
TCGA-HD-A6I0-01A-11R-A31R-13	HNSC	MIR6510	hsa-mir-6510	chr17	-	3p	41517239	NA	flanking-5	NA	NA	-24	A	C	-36.33	-35.83	NA	NA
TCGA-AD-A5EJ-01A-11H-A28I-13	COAD	MIR6513	hsa-mir-6513	chr2	-	5p	218280110	NA	flanking-3	NA	NA	17	A	G	-36.8	-36.8	NA	NA
TCGA-C5-A1BI-01B-11R-A13X-13	CESC	MIR6514	hsa-mir-6514	chr11	-	5p	62792694	NA	flanking-3	NA	NA	8	G	C	-38.1	-39.2	NA	NA
TCGA-DK-A1AD-01A-11R-A13X-13	BLCA	MIR6514	hsa-mir-6514	chr11	-	5p	62792682	NA	flanking-3	NA	NA	20	AGTT	A	-38.1	-38.1	NA	NA
TCGA-EP-A2KC-01A-11R-A214-13	LIHC	MIR6514	hsa-mir-6514	chr11	-	5p	62792688	NA	flanking-3	NA	NA	14	T	A	-38.1	-37.3	NA	NA
TCGA-DM-A1HA-01A-11H-A154-13	COAD	MIR6515	hsa-mir-6515	chr19	+	5p	12940511	NA	loop	NA	5	NA	C	T	-40.4	-41.2	NA	NA
TCGA-EE-A2MM-06A-11R-A18V-13	SKCM	MIR6516	hsa-mir-6516	chr17	+	3p	77089415	NA	flanking-5	NA	NA	-13	C	T	-32	-33.1	NA	NA
TCGA-55-6969-01A-11H-1948-13	LUAD	MIR6516	hsa-mir-6516	chr17	+	3p	77089406	NA	flanking-5	NA	NA	-22	G	T	-32	-32	NA	NA
TCGA-NC-A5HD-01A-11H-A26V-13	LUSC	MIR652	hsa-mir-652	chrX	+	3p	110055341	NA	flanking-5	NA	NA	-8	G	A	-56.6	-51.7	NA	NA
TCGA-BF-AAP4-01A-11R-A404-13	SKCM	MIR653	hsa-mir-653	chr7	-	both	93482816	NA	loop	NA	7	NA	G	A	-40.2	-41.7	NA	NA
TCGA-DA-A1HV-06A-21R-A18V-13	SKCM	MIR653	hsa-mir-653	chr7	-	both	93482765	NA	flanking-3	NA	NA	19	C	T	-40.2	-40.5	NA	NA
TCGA-55-6987-01A-11H-1948-13	LUAD	MIR653	hsa-mir-653	chr7	-	both	93482813	NA	loop	NA	10	NA	G	A	-40.2	-40.2	NA	NA
TCGA-X6-A7WC-01A-12R-A359-13	SARC	MIR653	hsa-mir-653	chr7	-	both	93482809	NA	loop	NA	14	NA	G	A	-40.2	-40.2	NA	NA
TCGA-D3-A8GB-06A-11R-A37G-13	SKCM	MIR654	hsa-mir-654	chr14	+	3p	101040262	COSN15625305	loop	NA	7	NA	C	T	-36	-35.4	NA	NA
TCGA-D5-6931-01A-11H-1927-13	COAD	MIR654	hsa-mir-654	chr14	+	3p	101040262	COSN15625305	loop	NA	7	NA	C	T	-36	-35.4	NA	NA
TCGA-D3-A2JE-06A-11R-A37G-13	SKCM	MIR654	hsa-mir-654	chr14	+	3p	101040262	COSN15625305	loop	NA	7	NA	C	T	-36	-35.4	NA	NA
TCGA-AF-3911-01A-01T-1735-13	READ	MIR655	hsa-mir-655	chr14	+	3p	101049653	NA	flanking-3	NA	NA	22	G	A	-37.9	-38.6	NA	NA
TCGA-L3-A524-01A-11H-A263-13	LUSC	MIR655	hsa-mir-655	chr14	+	3p	101049605	NA	loop	NA	12	NA	C	A	-37.9	-37.9	NA	NA
TCGA-33-4583-01A-01T-1442-13	LUSC	MIR655	hsa-mir-655	chr14	+	3p	101049570	COSN2378432	flanking-5	NA	NA	-2	G	A	-37.9	-38.3	NA	NA
TCGA-66-2787-01A-01T-0981-13	LUSC	MIR655	hsa-mir-655	chr14	+	3p	101049646	NA	flanking-3	NA	NA	15	C	T	-37.9	-37.1	NA	NA
TCGA-BC-A10S-01A-22R-A130-13	LIHC	MIR659	hsa-mir-659	chr22	-	5p	37847761	NA	flanking-5	NA	NA	-8	A	G	-60.3	-61.8	NA	NA
TCGA-ZF-AA54-01A-11R-A39B-13	BLCA	MIR659	hsa-mir-659	chr22	-	5p	37847718	NA	loop	NA	14	NA	G	A	-60.3	-57.7	NA	NA
TCGA-AP-A1E1-01A-11R-A136-13	UCEC	MIR660	hsa-mir-660	chrX	+	5p	50013284	NA	loop	NA	7	NA	C	T	-36.1	-36.1	NA	NA
TCGA-V5-A7RB-01A-11R-A353-13	ESCA	MIR660	hsa-mir-660	chrX	+	5p	50013286	NA	loop	NA	9	NA	C	G	-36.1	-36.1	NA	NA
TCGA-61-2110-01A-01R-1568-13	OV	MIR660	hsa-mir-660	chrX	+	5p	50013240	NA	flanking-5	NA	NA	-16	A	C	-36.1	-38.3	NA	NA
TCGA-AA-3815-01A-01T-1021-13	COAD	MIR660	hsa-mir-660	chrX	+	5p	50013252	NA	flanking-5	NA	NA	-4	C	T	-36.1	-34.8	NA	NA
TCGA-B6-A0IJ-01A-11R-A035-13	BRCA	MIR664A	hsa-mir-664a	chr1	-	both	220200593	COSN23014234	non-seed duplex_5p	17	NA	NA	C	A	-29	-27.3	NA	NA
TCGA-66-2787-01A-01T-0981-13	LUSC	MIR664A	hsa-mir-664a	chr1	-	both	220200538	NA	flanking-3	NA	NA	11	T	G	-29	-26	NA	NA
TCGA-CR-7402-01A-11R-2015-13	HNSC	MIR668	hsa-mir-668	chr14	+	3p	101055258	NA	flanking-5	NA	NA	-6	G	T	-34.5	-31	NA	NA
TCGA-PG-A917-01A-31R-A37P-13	UCEC	MIR671	hsa-mir-671	chr7	+	5p	151238532	NA	flanking-3	NA	NA	24	C	T	-63.4	-63.4	NA	NA
TCGA-AJ-A23O-01A-11R-A156-13	UCEC	MIR671	hsa-mir-671	chr7	+	5p	151238446	NA	flanking-5	NA	NA	-3	A	T	-63.4	-59.2	NA	NA
TCGA-A5-A0VP-01A-21R-A103-13	UCEC	MIR671	hsa-mir-671	chr7	+	5p	151238515	NA	flanking-3	NA	NA	7	G	A	-63.4	-62.7	NA	NA
TCGA-BS-A0U8-01A-11R-A103-13	UCEC	MIR671	hsa-mir-671	chr7	+	5p	151238441	NA	flanking-5	NA	NA	-8	G	T	-63.4	-60.6	NA	NA
TCGA-CC-A7IJ-01A-11R-A343-13	LIHC	MIR6726	hsa-mir-6726	chr1	-	both	1296176	NA	flanking-5	NA	NA	-11	C	T	-53.1	-52.6	NA	NA
TCGA-EE-A2M5-06A-12R-A18V-13	SKCM	MIR6726	hsa-mir-6726	chr1	-	both	1296179	NA	flanking-5	NA	NA	-14	G	A	-53.1	-53.1	NA	NA
TCGA-BG-A2AE-01A-11R-A16E-13	UCEC	MIR6726	hsa-mir-6726	chr1	-	both	1296107	COSM1151804	flanking-3	NA	NA	3	C	G	-53.1	-57.7	NA	NA
TCGA-B5-A3F9-01A-21R-A22I-13	UCEC	MIR6728	hsa-mir-6728	chr1	-	both	8866494	NA	flanking-3	NA	NA	8	T	C	-53.5	-53.4	NA	NA
TCGA-H5-A2HR-01A-11R-A17X-13	UCEC	MIR6728	hsa-mir-6728	chr1	-	both	8866480	NA	flanking-3	NA	NA	22	C	T	-53.5	-54.2	NA	NA
TCGA-GU-A762-01A-11R-A33A-13	BLCA	MIR6729	hsa-mir-6729	chr1	+	both	12029152	NA	flanking-5	NA	NA	-11	G	A	-57.1	-57.1	NA	NA
TCGA-ZB-A96V-01A-11R-A42U-13	THYM	MIR6730	hsa-mir-6730	chr1	-	5p	12578936	NA	flanking-3	NA	NA	22	C	T	-41.7	-41.7	NA	NA
TCGA-ZN-A9VQ-01A-11R-A404-13	MESO	MIR6730	hsa-mir-6730	chr1	-	5p	12578936	NA	flanking-3	NA	NA	22	C	T	-41.7	-41.7	NA	NA
TCGA-EY-A2OO-01A-11R-A19V-13	UCEC	MIR6730	hsa-mir-6730	chr1	-	5p	12578935	NA	flanking-3	NA	NA	23	G	A	-41.7	-41.7	NA	NA
TCGA-98-8021-01A-11H-2246-13	LUSC	MIR6731	hsa-mir-6731	chr1	-	5p	24919374	NA	loop	NA	16	NA	G	T	-41.45	-40.5	NA	NA
TCGA-YF-AA3L-01A-11R-A38M-13	BLCA	MIR6732	hsa-mir-6732	chr1	+	3p	37480226	NA	flanking-5	NA	NA	-9	G	T	-44	-47.2	NA	NA
TCGA-GC-A3RD-01A-12R-A22V-13	BLCA	MIR6732	hsa-mir-6732	chr1	+	3p	37480296	COSM3789969	flanking-3	NA	NA	7	G	T	-44	-41.6	NA	NA
TCGA-SX-A7SN-01A-11R-A359-13	KIRP	MIR6733	hsa-mir-6733	chr1	-	5p	43171640	NA	flanking-3	NA	NA	12	C	T	-29.1	-29.1	NA	NA
TCGA-G2-A3VY-01A-11R-A22V-13	BLCA	MIR6735	hsa-mir-6735	chr1	+	5p	43448582	NA	loop	NA	14	NA	G	A	-46.1	-44.4	NA	NA
TCGA-IR-A3LA-01A-11R-A22V-13	CESC	MIR6736	hsa-mir-6736	chr1	-	5p	145850663	NA	flanking-5	NA	NA	-23	C	T	-36.5	-36.4	NA	NA
TCGA-W3-AA1Q-06A-11R-A38N-13	SKCM	MIR6739	hsa-mir-6739	chr1	+	both	201863453	NA	flanking-3	NA	NA	6	C	T	-31.1	-32.1	NA	NA
TCGA-B0-4842-01A-02R-1419-13	KIRC	MIR6741	hsa-mir-6741	chr1	-	both	225922062	NA	flanking-3	NA	NA	18	C	A	-42.8	-40.1	NA	NA
TCGA-AX-A2IN-01A-12R-A17X-13	UCEC	MIR6742	hsa-mir-6742	chr1	-	both	228397112	NA	flanking-5	NA	NA	-8	G	GC	-44.9	-44.8	NA	NA
TCGA-CG-5726-01A-11R-1602-13	STAD	MIR6742	hsa-mir-6742	chr1	-	both	228397112	NA	flanking-5	NA	NA	-8	G	GC	-44.9	-44.8	NA	NA
TCGA-G4-6588-01A-11H-1773-13	COAD	MIR6742	hsa-mir-6742	chr1	-	both	228397074	COSN18435655	loop	NA	9	NA	G	A	-44.9	-43.5	NA	NA
TCGA-A5-A2K7-01A-11R-A17X-13	UCEC	MIR6742	hsa-mir-6742	chr1	-	both	228397112	NA	flanking-5	NA	NA	-8	G	GC	-44.9	-44.8	NA	NA
TCGA-AD-5900-01A-11H-1652-13	COAD	MIR6742	hsa-mir-6742	chr1	-	both	228397112	NA	flanking-5	NA	NA	-8	G	GC	-44.9	-44.8	NA	NA
TCGA-CG-4460-01A-01R-1157-13	STAD	MIR6742	hsa-mir-6742	chr1	-	both	228397112	NA	flanking-5	NA	NA	-8	G	GC	-44.9	-44.8	NA	NA
TCGA-F4-6856-01A-11H-1927-13	COAD	MIR6742	hsa-mir-6742	chr1	-	both	228397112	NA	flanking-5	NA	NA	-8	GC	G	-44.9	-44.1	NA	NA
TCGA-HU-A4GN-01A-11R-A252-13	STAD	MIR6742	hsa-mir-6742	chr1	-	both	228397112	NA	flanking-5	NA	NA	-8	G	GC	-44.9	-44.8	NA	NA
TCGA-PK-A5HB-01A-11R-A29W-13	ACC	MIR6742	hsa-mir-6742	chr1	-	both	228397112	NA	flanking-5	NA	NA	-8	GC	G	-44.9	-44.1	NA	NA
TCGA-SL-A6JA-01A-11R-A31S-13	UCEC	MIR6742	hsa-mir-6742	chr1	-	both	228397112	NA	flanking-5	NA	NA	-8	G	GC	-44.9	-44.8	NA	NA
TCGA-VQ-A8PP-01A-21R-A415-13	STAD	MIR6742	hsa-mir-6742	chr1	-	both	228397112	NA	flanking-5	NA	NA	-8	GC	G	-44.9	-44.1	NA	NA
TCGA-G2-A2EL-01A-12R-A18B-13	BLCA	MIR6743	hsa-mir-6743	chr11	+	3p	209369	NA	loop	NA	7	NA	G	A	-60.9	-60.9	NA	NA
TCGA-NC-A5HT-01A-11H-A26V-13	LUSC	MIR6746	hsa-mir-6746	chr11	-	both	61878207	NA	flanking-3	NA	NA	9	C	T	-42.5	-40.7	NA	NA
TCGA-VS-A953-01A-11R-A38M-13	CESC	MIR6747	hsa-mir-6747	chr11	-	3p	62567040	NA	loop	NA	3	NA	G	A	-36.7	-36.8	NA	NA
TCGA-04-1343-01A-01R-1564-13	OV	MIR6748	hsa-mir-6748	chr11	+	5p	62789805	NA	flanking-5	NA	NA	-15	C	G	-35.2	-35.2	NA	NA
TCGA-HM-A4S6-01A-11R-A26X-13	CESC	MIR6749	hsa-mir-6749	chr11	-	both	64902412	NA	loop	NA	17	NA	G	C	-44.25	-43.65	NA	NA
TCGA-64-5775-01A-01T-1627-13	LUAD	MIR6751	hsa-mir-6751	chr11	-	both	65129994	NA	flanking-5	NA	NA	-21	C	G	-41.9	-38.6	NA	NA
TCGA-EK-A2IP-01A-11R-A17X-13	CESC	MIR6752	hsa-mir-6752	chr11	+	3p	67490289	NA	loop	NA	18	NA	C	T	-53.1	-54.6	NA	NA
TCGA-XF-A9T3-01A-11R-A42V-13	BLCA	MIR6753	hsa-mir-6753	chr11	+	both	68044885	NA	loop	NA	70	NA	G	C	-94.13	-94.13	NA	NA
TCGA-G4-6588-01A-11H-1773-13	COAD	MIR6754	hsa-mir-6754	chr11	+	both	71473495	NA	flanking-5	NA	NA	-13	G	T	-53.8	-51.5	NA	NA
TCGA-29-1690-01A-01R-1566-13	OV	MIR6755	hsa-mir-6755	chr11	+	5p	86278373	NA	loop	NA	14	NA	A	G	-20.9	-23	NA	NA
TCGA-FU-A3HZ-01A-11R-A214-13	CESC	MIR676	hsa-mir-676	chrX	+	3p	70022865	COSN16130486	seed_5p	2	NA	NA	C	A	-37.2	-34.5	NA	NA
TCGA-EJ-7123-01A-11R-1964-13	PRAD	MIR6761	hsa-mir-6761	chr12	+	5p	111799926	NA	flanking-3	NA	NA	23	G	A	-32.5	-29.1	NA	NA
TCGA-D8-A1JA-01A-11R-A13P-13	BRCA	MIR6761	hsa-mir-6761	chr12	+	5p	111799823	NA	flanking-5	NA	NA	-16	G	T	-32.5	-33.8	NA	NA
TCGA-CK-4948-01B-11H-1652-13	COAD	MIR6765	hsa-mir-6765	chr14	-	3p	105150806	NA	loop	NA	34	NA	G	A	-65.1	-62.8	NA	NA
TCGA-AA-3713-01A-21H-1722-13	COAD	MIR6767	hsa-mir-6767	chr16	+	5p	2445373	NA	flanking-5	NA	NA	-24	C	T	-31.3	-31.1	NA	NA
TCGA-EB-A430-01A-11R-A24Y-13	SKCM	MIR6769A	hsa-mir-6769a	chr16	+	both	4671304	NA	flanking-5	NA	NA	-19	T	C	-44.8	-46.4	NA	NA
TCGA-B6-A0WS-01A-11R-A114-13	BRCA	MIR6769B	hsa-mir-6769b	chr1	+	both	206474867	COSM311955	flanking-3	NA	NA	3	C	T	-49.8	-49.8	NA	NA
TCGA-CN-5356-01A-01R-1435-13	HNSC	MIR6769B	hsa-mir-6769b	chr1	+	both	206474868	NA	flanking-3	NA	NA	4	G	A	-49.8	-49.8	NA	NA
TCGA-JW-A5VL-01A-11R-A28L-13	CESC	MIR6772	hsa-mir-6772	chr16	-	both	57772322	NA	loop	NA	4	NA	C	A	-38.1	-38.7	NA	NA
TCGA-VS-A94Z-01A-11R-A38M-13	CESC	MIR6774	hsa-mir-6774	chr16	+	both	85918382	NA	loop	NA	6	NA	C	A	-38	-40.5	NA	NA
TCGA-L5-A4OJ-01A-11R-A261-13	ESCA	MIR6774	hsa-mir-6774	chr16	+	both	85918383	NA	loop	NA	7	NA	C	T	-38	-39.9	NA	NA
TCGA-BR-7707-01A-11R-2055-13	STAD	MIR6777	hsa-mir-6777	chr17	-	5p	17813554	NA	flanking-5	NA	NA	-14	C	T	-49.6	-49	NA	NA
TCGA-D7-A6EZ-01A-11R-A31Q-13	STAD	MIR6779	hsa-mir-6779	chr17	+	5p	38914959	NA	flanking-5	NA	NA	-25	G	T	-45.5	-42.7	NA	NA
TCGA-97-8176-01A-11H-2402-13	LUAD	MIR6779	hsa-mir-6779	chr17	+	5p	38914977	NA	flanking-5	NA	NA	-7	G	A	-45.5	-42.9	NA	NA
TCGA-WE-A8ZR-06A-11R-A37G-13	SKCM	MIR6781	hsa-mir-6781	chr17	-	both	42823868	NA	flanking-3	NA	NA	12	A	T	-32.7	-33.7	NA	NA
TCGA-64-5778-01A-01T-1627-13	LUAD	MIR6787	hsa-mir-6787	chr17	+	both	82236748	NA	flanking-3	NA	NA	20	C	A	-47.2	-50.5	NA	NA
TCGA-D1-A17D-01A-12R-A12H-13	UCEC	MIR6787	hsa-mir-6787	chr17	+	both	82236733	COSM986085	flanking-3	NA	NA	5	G	A	-47.2	-44.6	NA	NA
TCGA-E7-A7XN-01A-11R-A358-13	BLCA	MIR6791	hsa-mir-6791	chr19	-	3p	6736742	NA	loop	NA	10	NA	C	G	-51.3	-51.3	NA	NA
TCGA-D3-A5GN-06A-11R-A27U-13	SKCM	MIR6794	hsa-mir-6794	chr19	+	both	12852253	NA	flanking-5	NA	NA	-12	G	A	-56.8	-57.9	NA	NA
TCGA-MV-A51V-01A-11R-A26X-13	BLCA	MIR6795	hsa-mir-6795	chr19	-	both	15179318	NA	loop	NA	4	NA	G	C	-45.1	-46.2	NA	NA
TCGA-DM-A1HA-01A-11H-A154-13	COAD	MIR6797	hsa-mir-6797	chr19	+	both	41869609	NA	flanking-5	NA	NA	-23	T	C	-41.85	-41.85	NA	NA
TCGA-AJ-A23O-01A-11R-A156-13	UCEC	MIR6797	hsa-mir-6797	chr19	+	both	41869619	NA	flanking-5	NA	NA	-13	C	A	-41.85	-41.2	NA	NA
TCGA-18-3419-01A-01T-0981-13	LUSC	MIR6797	hsa-mir-6797	chr19	+	both	41869718	NA	flanking-3	NA	NA	22	C	T	-41.85	-39.65	NA	NA
TCGA-IG-A51D-01A-11R-A261-13	ESCA	MIR6797	hsa-mir-6797	chr19	+	both	41869707	NA	flanking-3	NA	NA	11	A	G	-41.85	-41.95	NA	NA
TCGA-ZF-AA4V-01A-11R-A38M-13	BLCA	MIR6797	hsa-mir-6797	chr19	+	both	41869718	NA	flanking-3	NA	NA	22	C	T	-41.85	-39.65	NA	NA
TCGA-BA-A6DA-01A-31R-A31R-13	HNSC	MIR6802	hsa-mir-6802	chr19	-	3p	55239899	NA	flanking-3	NA	NA	13	T	A	-46.6	-46.4	NA	NA
TCGA-AA-3994-01A-01T-1114-13	COAD	MIR6802	hsa-mir-6802	chr19	-	3p	55239937	NA	loop	NA	15	NA	G	A	-46.6	-46.6	NA	NA
TCGA-PK-A5HB-01A-11R-A29W-13	ACC	MIR6804	hsa-mir-6804	chr19	-	5p	55230864	NA	flanking-3	NA	NA	21	G	A	-46.93	-46.75	NA	NA
TCGA-5M-AAT6-01A-11H-A41D-13	COAD	MIR6807	hsa-mir-6807	chr19	+	both	58550315	NA	loop	NA	9	NA	AG	A	-34.8	-34.5	NA	NA
TCGA-57-1993-01A-01R-1568-13	OV	MIR6808	hsa-mir-6808	chr1	-	3p	1339675	NA	loop	NA	7	NA	A	G	-50.4	-50.4	NA	NA
TCGA-NC-A5HI-01A-11H-A26V-13	LUSC	MIR6808	hsa-mir-6808	chr1	-	3p	1339628	NA	flanking-3	NA	NA	22	G	A	-50.4	-48.1	NA	NA
TCGA-D3-A8GL-06A-11R-A37G-13	SKCM	MIR6811	hsa-mir-6811	chr2	+	5p	237510992	NA	flanking-3	NA	NA	4	C	T	-33	-31.1	NA	NA
TCGA-05-5425-01A-02T-1627-13	LUAD	MIR6811	hsa-mir-6811	chr2	+	5p	237510992	COSM6157480	flanking-3	NA	NA	4	C	A	-33	-31.1	NA	NA
TCGA-AX-A2HJ-01A-11R-A17A-13	UCEC	MIR6811	hsa-mir-6811	chr2	+	5p	237510924	NA	flanking-5	NA	NA	-8	T	A	-33	-33.2	NA	NA
TCGA-95-7567-01A-11H-2065-13	LUAD	MIR6814	hsa-mir-6814	chr21	-	both	41746801	NA	loop	NA	14	NA	T	G	-28.65	-29.2	NA	NA
TCGA-AO-A0J3-01A-11R-A035-13	BRCA	MIR6815	hsa-mir-6815	chr21	+	5p	45478350	NA	flanking-3	NA	NA	24	G	T	-34.9	-34.9	NA	NA
TCGA-DK-A2I4-01A-11R-A21E-13	BLCA	MIR6815	hsa-mir-6815	chr21	+	5p	45478342	NA	flanking-3	NA	NA	16	G	A	-34.9	-35.7	NA	NA
TCGA-53-7813-01A-11H-2169-13	LUAD	MIR6817	hsa-mir-6817	chr22	+	3p	25455722	NA	flanking-3	NA	NA	12	T	C	-32.8	-32.3	NA	NA
TCGA-BR-4368-01A-01R-1157-13	STAD	MIR6820	hsa-mir-6820	chr22	+	both	37967637	NA	flanking-3	NA	NA	13	C	T	-27	-27.9	NA	NA
TCGA-56-8308-01A-11H-2295-13	LUSC	MIR6820	hsa-mir-6820	chr22	+	both	37967644	NA	flanking-3	NA	NA	20	A	G	-27	-27	NA	NA
TCGA-64-5781-01A-01T-1627-13	LUAD	MIR6821	hsa-mir-6821	chr22	+	5p	49962899	NA	loop	NA	11	NA	C	T	-58.5	-59.5	NA	NA
TCGA-BH-A2L8-01A-11R-A18L-13	BRCA	MIR6821	hsa-mir-6821	chr22	+	5p	49962899	NA	loop	NA	11	NA	C	T	-58.5	-59.5	NA	NA
TCGA-D1-A101-01A-12R-A10I-13	UCEC	MIR6821	hsa-mir-6821	chr22	+	5p	49962900	NA	loop	NA	12	NA	G	A	-58.5	-57.6	NA	NA
TCGA-D1-A17H-01A-11R-A12H-13	UCEC	MIR6825	hsa-mir-6825	chr3	-	5p	127575300	NA	loop	NA	5	NA	G	A	-55.4	-52.9	NA	NA
TCGA-CZ-5465-01A-01R-1502-13	KIRC	MIR6827	hsa-mir-6827	chr3	-	5p	134367862	NA	flanking-5	NA	NA	-5	A	T	-42.9	-43.4	NA	NA
TCGA-D9-A3Z3-06A-11R-A23A-13	SKCM	MIR6833	hsa-mir-6833	chr6	+	both	32179846	NA	loop	NA	4	NA	C	T	-24.52	-24.52	NA	NA
TCGA-EE-A2GO-06A-11R-A18V-13	SKCM	MIR6833	hsa-mir-6833	chr6	+	both	32179810	NA	flanking-5	NA	NA	-11	C	T	-24.52	-28.6	NA	NA
TCGA-EE-A29P-06A-11R-A18W-13	SKCM	MIR6834	hsa-mir-6834	chr6	+	both	33290289	NA	loop	NA	24	NA	C	T	-40.5	-40.3	NA	NA
TCGA-73-A9RS-01A-11H-A41D-13	LUAD	MIR6834	hsa-mir-6834	chr6	+	both	33290331	NA	flanking-3	NA	NA	7	G	T	-40.5	-39	NA	NA
TCGA-77-A5G3-01A-31H-A27R-13	LUSC	MIR6836	hsa-mir-6836	chr7	-	both	2257596	NA	flanking-5	NA	NA	-24	C	A	-50.2	-47.1	NA	NA
TCGA-EE-A2MF-06A-11R-A21E-13	SKCM	MIR6837	hsa-mir-6837	chr7	+	5p	44051830	COSM4892913	flanking-3	NA	NA	1	A	G	-42.9	-45.9	NA	NA
TCGA-AZ-4313-01A-01T-1409-13	COAD	MIR6837	hsa-mir-6837	chr7	+	5p	44051751	NA	flanking-5	NA	NA	-20	C	T	-42.9	-44.7	NA	NA
TCGA-E5-A4U1-01A-11R-A31R-13	BLCA	MIR6837	hsa-mir-6837	chr7	+	5p	44051846	NA	flanking-3	NA	NA	17	G	A	-42.9	-45.6	NA	NA
TCGA-BR-4370-01A-01R-1157-13	STAD	MIR6838	hsa-mir-6838	chr7	-	both	44073361	NA	flanking-3	NA	NA	17	G	A	-34.3	-38.9	NA	NA
TCGA-CZ-5465-01A-01R-1502-13	KIRC	MIR6838	hsa-mir-6838	chr7	-	both	44073452	NA	flanking-5	NA	NA	-24	G	C	-34.3	-34.75	NA	NA
TCGA-13-0894-01B-01R-1565-13	OV	MIR6842	hsa-mir-6842	chr8	+	3p	27433455	NA	flanking-3	NA	NA	21	A	C	-41.7	-41.7	NA	NA
TCGA-D3-A51F-06A-11R-A25Z-13	SKCM	MIR6842	hsa-mir-6842	chr8	+	3p	27433458	NA	flanking-3	NA	NA	24	C	T	-41.7	-41.7	NA	NA
TCGA-EE-A3J5-06A-11R-A20E-13	SKCM	MIR6842	hsa-mir-6842	chr8	+	3p	27433457	NA	flanking-3	NA	NA	23	C	T	-41.7	-41.7	NA	NA
TCGA-GF-A3OT-06A-23R-A23A-13	SKCM	MIR6842	hsa-mir-6842	chr8	+	3p	27433369	NA	flanking-5	NA	NA	-6	C	T	-41.7	-39.4	NA	NA
TCGA-EE-A2GO-06A-11R-A18V-13	SKCM	MIR6842	hsa-mir-6842	chr8	+	3p	27433363	NA	flanking-5	NA	NA	-12	C	T	-41.7	-41.7	NA	NA
TCGA-CN-5365-01A-01R-1435-13	HNSC	MIR6842	hsa-mir-6842	chr8	+	3p	27433405	NA	loop	NA	9	NA	T	A	-41.7	-45.6	NA	NA
TCGA-CA-6716-01A-11H-1838-13	COAD	MIR6847	hsa-mir-6847	chr8	+	5p	144079904	NA	loop	NA	3	NA	G	A	-45.2	-45.2	NA	NA
TCGA-EE-A2GR-06A-11R-A18V-13	SKCM	MIR6849	hsa-mir-6849	chr8	-	both	144400344	NA	flanking-5	NA	NA	-4	G	A	-49.2	-46.5	NA	NA
TCGA-EW-A1PB-01A-11R-A143-13	BRCA	MIR6850	hsa-mir-6850	chr8	-	5p	144791958	NA	loop	NA	12	NA	C	A	-45.6	-45.6	NA	NA
TCGA-AR-A24Q-01A-12R-A168-13	BRCA	MIR6851	hsa-mir-6851	chr9	-	both	33467896	NA	loop	NA	12	NA	G	A	-49.7	-49.7	NA	NA
TCGA-AG-3894-01A-01T-1120-13	READ	MIR6853	hsa-mir-6853	chr9	+	3p	35733000	COSM288808	flanking-3	NA	NA	5	C	G	-33.33	-34.6	NA	NA
TCGA-DK-A1AC-01A-11R-A13X-13	BLCA	MIR6853	hsa-mir-6853	chr9	+	3p	35733001	COSM1314809	flanking-3	NA	NA	6	G	A	-33.33	-33.8	NA	NA
TCGA-B5-A0JV-01A-11R-A103-13	UCEC	MIR6854	hsa-mir-6854	chr9	-	5p	98229182	NA	loop	NA	7	NA	G	A	-33.8	-33.8	NA	NA
TCGA-24-0982-01A-01R-1565-13	OV	MIR6857	hsa-mir-6857	chrX	-	3p	53405660	NA	flanking-3	NA	NA	13	C	A	-43.8	-42.3	NA	NA
TCGA-FS-A1ZZ-06A-11R-A18V-13	SKCM	MIR6857	hsa-mir-6857	chrX	-	3p	53405712	NA	loop	NA	27	NA	G	A	-43.8	-44.3	NA	NA
TCGA-VQ-A91N-01A-11R-A415-13	STAD	MIR6857	hsa-mir-6857	chrX	-	3p	53405655	NA	flanking-3	NA	NA	18	C	T	-43.8	-43.9	NA	NA
TCGA-DI-A1NO-01A-31R-A156-13	UCEC	MIR6858	hsa-mir-6858	chrX	+	both	154450358	NA	loop	NA	17	NA	C	T	-52.9	-52.9	NA	NA
TCGA-EE-A2MF-06A-11R-A21E-13	SKCM	MIR6858	hsa-mir-6858	chrX	+	both	154450347	NA	loop	NA	6	NA	C	T	-52.9	-52.9	NA	NA
TCGA-YG-AA3O-06A-11R-A38N-13	SKCM	MIR6861	hsa-mir-6861	chr12	-	both	112163332	NA	flanking-5	NA	NA	-16	G	C	-52.9	-51	NA	NA
TCGA-QB-A6FS-06A-11R-A310-13	SKCM	MIR6866	hsa-mir-6866	chr17	+	5p	40161973	NA	loop	NA	13	NA	G	A	-35.3	-36.9	NA	NA
TCGA-HU-A4H8-01A-11R-A252-13	STAD	MIR6868	hsa-mir-6868	chr17	-	3p	76098002	NA	flanking-3	NA	NA	17	C	T	-42.48	-42.08	NA	NA
TCGA-P3-A6T4-01A-11R-A34O-13	HNSC	MIR6870	hsa-mir-6870	chr20	-	both	10649619	NA	flanking-3	NA	NA	17	C	G	-33.6	-30.4	NA	NA
TCGA-MA-AA42-01A-12R-A38M-13	CESC	MIR6870	hsa-mir-6870	chr20	-	both	10649696	COSN18743156	flanking-5	NA	NA	-6	GA	G	-33.6	-34.2	NA	NA
TCGA-AZ-4615-01A-01T-1409-13	COAD	MIR6870	hsa-mir-6870	chr20	-	both	10649696	COSN18743156	flanking-5	NA	NA	-6	GA	G	-33.6	-34.2	NA	NA
TCGA-BS-A0TJ-01A-11R-A103-13	UCEC	MIR6870	hsa-mir-6870	chr20	-	both	10649696	COSN18743156	flanking-5	NA	NA	-6	GA	G	-33.6	-34.2	NA	NA
TCGA-FD-A62N-01A-11R-A30J-13	BLCA	MIR6871	hsa-mir-6871	chr20	+	both	41169006	NA	flanking-5	NA	NA	-22	C	T	-45.4	-43.8	NA	NA
TCGA-X6-A8C6-01A-11R-A36A-13	SARC	MIR6871	hsa-mir-6871	chr20	+	both	41169093	NA	flanking-3	NA	NA	15	A	G	-45.4	-46.5	NA	NA
TCGA-CJ-4923-01A-01R-1425-13	KIRC	MIR6875	hsa-mir-6875	chr7	+	5p	100868022	NA	flanking-5	NA	NA	-19	G	A	-45.9	-41.6	NA	NA
TCGA-38-4625-01A-01T-1207-13	LUAD	MIR6875	hsa-mir-6875	chr7	+	5p	100868105	NA	flanking-3	NA	NA	4	C	T	-45.9	-45.9	NA	NA
TCGA-C5-A8YQ-01A-11R-A37P-13	CESC	MIR6875	hsa-mir-6875	chr7	+	5p	100868105	NA	flanking-3	NA	NA	4	C	T	-45.9	-45.9	NA	NA
TCGA-G4-6628-01A-11H-1838-13	COAD	MIR6875	hsa-mir-6875	chr7	+	5p	100868123	NA	flanking-3	NA	NA	22	AG	A	-45.9	-43.4	NA	NA
TCGA-UY-A8OB-01A-12R-A42V-13	BLCA	MIR6876	hsa-mir-6876	chr8	+	both	25345400	NA	flanking-5	NA	NA	-7	A	G	-38.6	-38.9	NA	NA
TCGA-EE-A2MU-06A-21R-A18V-13	SKCM	MIR6877	hsa-mir-6877	chr9	+	5p	133052072	NA	flanking-3	NA	NA	17	C	T	-49.7	-49.7	NA	NA
TCGA-BB-A5HY-01A-11R-A28Z-13	HNSC	MIR6877	hsa-mir-6877	chr9	+	5p	133052069	NA	flanking-3	NA	NA	14	A	G	-49.7	-49.7	NA	NA
TCGA-EE-A20C-06A-11R-A18V-13	SKCM	MIR6878	hsa-mir-6878	chr1	+	both	150492384	NA	loop	NA	12	NA	C	T	-32.3	-31.7	NA	NA
TCGA-IZ-A6M8-01A-11R-A31S-13	KIRP	MIR6878	hsa-mir-6878	chr1	+	both	150492329	NA	flanking-5	NA	NA	-21	C	A	-32.3	-32.3	NA	NA
TCGA-94-8491-01A-11H-2325-13	LUSC	MIR6882	hsa-mir-6882	chr15	-	5p	74840624	NA	flanking-3	NA	NA	18	G	T	-32.57	-32.57	NA	NA
TCGA-AD-5900-01A-11H-1652-13	COAD	MIR6882	hsa-mir-6882	chr15	-	5p	74840630	NA	flanking-3	NA	NA	12	C	T	-32.57	-33.1	NA	NA
TCGA-BP-4967-01A-01R-1333-13	KIRC	MIR6883	hsa-mir-6883	chr17	-	3p	8144988	COSM473576	flanking-3	NA	NA	6	T	A	-35.3	-35.5	NA	NA
TCGA-QU-A6IN-01A-11R-A31R-13	PRAD	MIR6884	hsa-mir-6884	chr17	-	5p	40026323	NA	flanking-3	NA	NA	11	A	C	-28.04	-27.33	NA	NA
TCGA-EE-A2A2-06A-11R-A18W-13	SKCM	MIR6885	hsa-mir-6885	chr19	-	5p	6389638	COSM3540898	non-seed duplex_3p	21	NA	NA	C	T	-45	-45	NA	NA
TCGA-AD-A5EJ-01A-11H-A28I-13	COAD	MIR6885	hsa-mir-6885	chr19	-	5p	6389707	NA	flanking-5	NA	NA	-9	G	A	-45	-45	NA	NA
TCGA-JX-A3Q0-01A-11R-A21U-13	CESC	MIR6887	hsa-mir-6887	chr19	+	both	35122697	NA	flanking-5	NA	NA	-8	C	G	-42.9	-44.6	NA	NA
TCGA-AX-A1C4-01A-11R-A136-13	UCEC	MIR6887	hsa-mir-6887	chr19	+	both	35122770	NA	flanking-3	NA	NA	6	C	T	-42.9	-39.58	NA	NA
TCGA-VS-A9UP-01A-11R-A42V-13	CESC	MIR6889	hsa-mir-6889	chr22	-	5p	41253016	NA	loop	NA	7	NA	C	T	-49.2	-49.2	NA	NA
TCGA-AJ-A2QM-01A-11R-A18L-13	UCEC	MIR6890	hsa-mir-6890	chr3	-	5p	49099926	NA	flanking-5	NA	NA	-17	G	A	-45.2	-45.03	NA	NA
TCGA-IR-A3LK-01A-12R-A214-13	CESC	MIR6891	hsa-mir-6891	chr6	-	5p	31355224	COSM4816952	flanking-3	NA	NA	4	C	T	-58.98	-58.7	NA	NA
TCGA-Q1-A73O-01A-11R-A32K-13	CESC	MIR6891	hsa-mir-6891	chr6	-	5p	31355339	NA	flanking-5	NA	NA	-24	C	T	-58.98	-58.7	NA	NA
TCGA-VS-A94Z-01A-11R-A38M-13	CESC	MIR6891	hsa-mir-6891	chr6	-	5p	31355224	COSM4854831	flanking-3	NA	NA	4	C	G	-58.98	-58.7	NA	NA
TCGA-FA-A7DS-01A-11R-A38N-13	DLBC	MIR6891	hsa-mir-6891	chr6	-	5p	31355320	NA	flanking-5	NA	NA	-5	A	AT	-58.98	-58.6	NA	NA
TCGA-IR-A3LL-01A-11R-A214-13	CESC	MIR6891	hsa-mir-6891	chr6	-	5p	31355224	COSM4816952	flanking-3	NA	NA	4	C	T	-58.98	-58.7	NA	NA
TCGA-NA-A4QW-01A-11R-A28Z-13	UCS	MIR6891	hsa-mir-6891	chr6	-	5p	31355214	NA	flanking-3	NA	NA	14	G	A	-58.98	-58.7	NA	NA
TCGA-AZ-4615-01A-01T-1409-13	COAD	MIR6891	hsa-mir-6891	chr6	-	5p	31355315	COSM5139791	non-seed duplex_5p	1	NA	NA	A	AC	-58.98	-62.4	NA	NA
TCGA-C5-A7X8-01A-11R-A36A-13	CESC	MIR6891	hsa-mir-6891	chr6	-	5p	31355224	COSM4854831	flanking-3	NA	NA	4	C	G	-58.98	-58.7	NA	NA
TCGA-GF-A3OT-06A-23R-A23A-13	SKCM	MIR6891	hsa-mir-6891	chr6	-	5p	31355258	NA	loop	NA	39	NA	C	T	-58.98	-55.48	NA	NA
TCGA-EE-A3AA-06A-11R-A18V-13	SKCM	MIR6892	hsa-mir-6892	chr7	+	5p	143382671	NA	flanking-5	NA	NA	-15	C	T	-53.65	-53.65	NA	NA
TCGA-EE-A20C-06A-11R-A18V-13	SKCM	MIR6892	hsa-mir-6892	chr7	+	5p	143382711	NA	loop	NA	5	NA	C	A	-53.65	-53.75	NA	NA
TCGA-Z6-A8JE-01A-11R-A37J-13	ESCA	MIR6892	hsa-mir-6892	chr7	+	5p	143382743	NA	loop	NA	37	NA	A	G	-53.65	-57.14	NA	NA
TCGA-55-7227-01A-11H-2038-13	LUAD	MIR6892	hsa-mir-6892	chr7	+	5p	143382684	COSM6176854	flanking-5	NA	NA	-2	G	T	-53.65	-54.45	NA	NA
TCGA-MN-A4N1-01A-11H-A24S-13	LUAD	MIR6892	hsa-mir-6892	chr7	+	5p	143382714	NA	loop	NA	8	NA	G	T	-53.65	-54.34	NA	NA
TCGA-EW-A1IZ-01A-11R-A13P-13	BRCA	MIR6892	hsa-mir-6892	chr7	+	5p	143382758	NA	loop	NA	52	NA	G	A	-53.65	-53.35	NA	NA
TCGA-55-6969-01A-11H-1948-13	LUAD	MIR6892	hsa-mir-6892	chr7	+	5p	143382752	NA	loop	NA	46	NA	G	T	-53.65	-50.6	NA	NA
TCGA-GM-A3XL-01A-11R-A22V-13	BRCA	MIR6892	hsa-mir-6892	chr7	+	5p	143382718	NA	loop	NA	12	NA	C	T	-53.65	-53.75	NA	NA
TCGA-CW-6093-01A-11R-1671-13	KIRC	MIR6892	hsa-mir-6892	chr7	+	5p	143382668	NA	flanking-5	NA	NA	-18	G	A	-53.65	-53.45	NA	NA
TCGA-G3-A5SK-01A-11R-A27R-13	LIHC	MIR6894	hsa-mir-6894	chrX	-	both	53198865	NA	flanking-3	NA	NA	24	A	T	-42.8	-42.8	NA	NA
TCGA-NH-A50V-01A-11H-A28I-13	COAD	MIR708	hsa-mir-708	chr11	-	5p	79402008	NA	flanking-3	NA	NA	24	T	A	-48.1	-48.1	NA	NA
TCGA-CM-4746-01A-01T-1409-13	COAD	MIR708	hsa-mir-708	chr11	-	5p	79402074	COSN23012351	loop	NA	3	NA	AC	A	-48.1	-48.7	NA	NA
TCGA-ED-A459-01A-11R-A25Z-13	LIHC	MIR708	hsa-mir-708	chr11	-	5p	79402092	COSN16303180	seed_5p	8	NA	NA	A	G	-48.1	-43.6	NA	NA
TCGA-44-5644-01A-21H-2038-13	LUAD	MIR7108	hsa-mir-7108	chr19	-	5p	2434967	NA	loop	NA	13	NA	C	T	-77.6	-74.4	NA	NA
TCGA-F7-A624-01A-22R-A30I-13	HNSC	MIR7108	hsa-mir-7108	chr19	-	5p	2435011	NA	flanking-5	NA	NA	-11	T	C	-77.6	-77.28	NA	NA
TCGA-QB-AA9O-06A-11R-A39J-13	SKCM	MIR7108	hsa-mir-7108	chr19	-	5p	2434957	NA	loop	NA	23	NA	G	A	-77.6	-77.5	NA	NA
TCGA-D1-A101-01A-12R-A10I-13	UCEC	MIR7110	hsa-mir-7110	chr3	+	3p	123161849	NA	loop	NA	30	NA	TTC	T	-51.6	-52	NA	NA
TCGA-YG-AA3N-01A-11R-A38N-13	SKCM	MIR7111	hsa-mir-7111	chr6	+	both	35470542	NA	loop	NA	12	NA	C	T	-38	-38.3	NA	NA
TCGA-OR-A5LD-01A-11R-A29W-13	ACC	MIR7112	hsa-mir-7112	chr8	-	3p	144262664	NA	flanking-3	NA	NA	9	CGTT	C	-47.23	-40.48	NA	NA
TCGA-EE-A20B-06A-11R-A18X-13	SKCM	MIR7112	hsa-mir-7112	chr8	-	3p	144262708	NA	loop	NA	8	NA	C	T	-47.23	-46.73	NA	NA
TCGA-MX-A5UJ-01A-11R-A31Q-13	STAD	MIR7112	hsa-mir-7112	chr8	-	3p	144262756	NA	flanking-5	NA	NA	-19	G	A	-47.23	-47.93	NA	NA
TCGA-21-1080-01A-01T-1557-13	LUSC	MIR7112	hsa-mir-7112	chr8	-	3p	144262707	NA	loop	NA	9	NA	T	G	-47.23	-47.08	NA	NA
TCGA-IR-A3LA-01A-11R-A22V-13	CESC	MIR7113	hsa-mir-7113	chr11	+	5p	68032860	NA	flanking-5	NA	NA	-5	G	A	-46.9	-43.4	NA	NA
TCGA-EE-A2GD-06A-11R-A18W-13	SKCM	MIR7155	hsa-mir-7155	chr11	-	3p	64341912	NA	flanking-5	NA	NA	-8	C	T	-78	-71.1	NA	NA
TCGA-AJ-A3BG-01A-11R-A19V-13	UCEC	MIR744	hsa-mir-744	chr17	+	5p	12081958	NA	loop	NA	28	NA	C	T	-49.35	-49.35	NA	NA
TCGA-IA-A83S-01A-11R-A359-13	KIRP	MIR744	hsa-mir-744	chr17	+	5p	12081900	NA	flanking-5	NA	NA	-9	TG	T	-49.35	-45.25	NA	NA
TCGA-AP-A0LE-01A-11R-A103-13	UCEC	MIR744	hsa-mir-744	chr17	+	5p	12082007	NA	flanking-3	NA	NA	20	C	T	-49.35	-48.15	NA	NA
TCGA-96-A4JK-01A-11H-A25B-13	LUSC	MIR744	hsa-mir-744	chr17	+	5p	12081994	NA	flanking-3	NA	NA	7	G	T	-49.35	-47.15	NA	NA
TCGA-LN-A7HY-01A-12R-A353-13	ESCA	MIR744	hsa-mir-744	chr17	+	5p	12081958	NA	loop	NA	28	NA	C	T	-49.35	-49.35	NA	NA
TCGA-CH-5772-01A-11R-1579-13	PRAD	MIR758	hsa-mir-758	chr14	+	both	101026099	NA	flanking-3	NA	NA	7	A	T	-30.5	-26.6	NA	NA
TCGA-CN-6013-01A-11R-1685-13	HNSC	MIR758	hsa-mir-758	chr14	+	both	101026095	NA	flanking-3	NA	NA	3	C	T	-30.5	-28.3	NA	NA
TCGA-D5-6928-01A-11H-1927-13	COAD	MIR758	hsa-mir-758	chr14	+	both	101026018	NA	flanking-5	NA	NA	-16	G	A	-30.5	-30.5	NA	NA
TCGA-BF-A1PV-01A-11R-A18X-13	SKCM	MIR758	hsa-mir-758	chr14	+	both	101026110	NA	flanking-3	NA	NA	18	C	T	-30.5	-32.3	NA	NA
TCGA-09-2051-01A-01R-1568-13	OV	MIR758	hsa-mir-758	chr14	+	both	101026111	NA	flanking-3	NA	NA	19	C	A	-30.5	-30.5	NA	NA
TCGA-AA-A022-01A-21R-A082-13	COAD	MIR758	hsa-mir-758	chr14	+	both	101026106	NA	flanking-3	NA	NA	14	GC	G	-30.5	-30.2	NA	NA
TCGA-L5-A8NM-01A-11R-A37J-13	ESCA	MIR758	hsa-mir-758	chr14	+	both	101026106	NA	flanking-3	NA	NA	14	GC	G	-30.5	-30.2	NA	NA
TCGA-AG-A00C-01A-21R-A076-13	READ	MIR758	hsa-mir-758	chr14	+	both	101026106	NA	flanking-3	NA	NA	14	G	T	-30.5	-32.6	NA	NA
TCGA-C8-A274-01A-11R-A16E-13	BRCA	MIR766	hsa-mir-766	chrX	-	both	119646766	COSN4710443	non-seed duplex_3p	19	NA	NA	G	A	-49.4	-47.6	NA	NA
TCGA-A3-3358-01A-01R-1540-13	KIRC	MIR766	hsa-mir-766	chrX	-	both	119646739	NA	flanking-3	NA	NA	24	C	T	-49.4	-49.4	NA	NA
TCGA-66-2795-01A-02T-0981-13	LUSC	MIR767	hsa-mir-767	chrX	-	5p	152393513	NA	flanking-5	NA	NA	-10	A	G	-44	-39.8	NA	NA
TCGA-CV-7406-01A-11R-2080-13	HNSC	MIR873	hsa-mir-873	chr9	-	5p	28888867	NA	flanking-3	NA	NA	22	G	A	-31.3	-32.09	NA	NA
TCGA-95-7039-01A-11H-1948-13	LUAD	MIR873	hsa-mir-873	chr9	-	5p	28888891	COSN24411686	non-seed duplex_3p	20	NA	NA	C	A	-31.3	-35.4	NA	NA
TCGA-D3-A5GU-06A-11R-A27U-13	SKCM	MIR873	hsa-mir-873	chr9	-	5p	28888903	COSN5030235	seed_3p	8	NA	NA	C	T	-31.3	-27.14	NA	NA
TCGA-4A-A93W-01A-11R-A37G-13	KIRP	MIR874	hsa-mir-874	chr5	-	3p	137647655	NA	flanking-5	NA	NA	-15	A	C	-44.5	-47.2	NA	NA
TCGA-A5-A2K3-01A-11R-A17X-13	UCEC	MIR874	hsa-mir-874	chr5	-	3p	137647608	NA	loop	NA	10	NA	C	T	-44.5	-44.1	NA	NA
TCGA-44-5644-01A-21H-2038-13	LUAD	MIR876	hsa-mir-876	chr9	-	both	28863634	COSN24411688	flanking-3	NA	NA	2	T	A	-52.7	-48.5	NA	NA
TCGA-4Z-AA80-01A-11R-A39B-13	BLCA	MIR876	hsa-mir-876	chr9	-	both	28863670	NA	loop	NA	5	NA	A	T	-52.7	-53.6	NA	NA
TCGA-XF-A8HD-01A-11R-A36A-13	BLCA	MIR877	hsa-mir-877	chr6	+	5p	30584326	NA	flanking-5	NA	NA	-6	G	C	-43.43	-42.46	NA	NA
TCGA-G2-A2EO-01A-11R-A17X-13	BLCA	MIR877	hsa-mir-877	chr6	+	5p	30584317	NA	flanking-5	NA	NA	-15	G	A	-43.43	-42.73	NA	NA
TCGA-55-8302-01A-11H-2325-13	LUAD	MIR887	hsa-mir-887	chr5	+	3p	15935178	NA	flanking-5	NA	NA	-13	C	A	-52.5	-51.1	NA	NA
TCGA-DA-A3F8-06A-11R-A20E-13	SKCM	MIR887	hsa-mir-887	chr5	+	3p	15935172	NA	flanking-5	NA	NA	-19	G	A	-52.5	-51.7	NA	NA
TCGA-95-7562-01A-11H-2240-13	LUAD	MIR887	hsa-mir-887	chr5	+	3p	15935176	NA	flanking-5	NA	NA	-15	C	A	-52.5	-46.9	NA	NA
TCGA-63-A5MU-01A-11H-A26V-13	LUSC	MIR887	hsa-mir-887	chr5	+	3p	15935178	NA	flanking-5	NA	NA	-13	C	T	-52.5	-50.6	NA	NA
TCGA-HU-A4GX-01A-12R-A252-13	STAD	MIR887	hsa-mir-887	chr5	+	3p	15935178	NA	flanking-5	NA	NA	-13	C	T	-52.5	-50.6	NA	NA
TCGA-46-3769-01A-01T-0981-13	LUSC	MIR887	hsa-mir-887	chr5	+	3p	15935176	NA	flanking-5	NA	NA	-15	C	A	-52.5	-46.9	NA	NA
TCGA-50-5933-01A-11H-1754-13	LUAD	MIR887	hsa-mir-887	chr5	+	3p	15935238	COSN24408987	non-seed duplex_3p	10	NA	NA	C	T	-52.5	-52.5	NA	NA
TCGA-BR-8382-01A-11R-2402-13	STAD	MIR887	hsa-mir-887	chr5	+	3p	15935166	NA	flanking-5	NA	NA	-25	G	A	-52.5	-52.6	NA	NA
TCGA-JW-A5VL-01A-11R-A28L-13	CESC	MIR887	hsa-mir-887	chr5	+	3p	15935170	NA	flanking-5	NA	NA	-21	G	C	-52.5	-51.7	NA	NA
TCGA-86-8054-01A-11H-2240-13	LUAD	MIR887	hsa-mir-887	chr5	+	3p	15935271	NA	flanking-3	NA	NA	21	C	A	-52.5	-52.3	NA	NA
TCGA-60-2714-01A-01T-1557-13	LUSC	MIR887	hsa-mir-887	chr5	+	3p	15935179	NA	flanking-5	NA	NA	-12	G	T	-52.5	-54	NA	NA
TCGA-55-A492-01A-11H-A24G-13	LUAD	MIR888	hsa-mir-888	chrX	-	5p	145994820	NA	loop	NA	10	NA	G	T	-36.5	-36.5	NA	NA
TCGA-D1-A160-01A-11R-A119-13	UCEC	MIR888	hsa-mir-888	chrX	-	5p	145994865	NA	flanking-5	NA	NA	-15	A	G	-36.5	-38.3	NA	NA
TCGA-DA-A1IC-06A-11R-A18V-13	SKCM	MIR889	hsa-mir-889	chr14	+	3p	101047887	NA	flanking-5	NA	NA	-24	G	A	-30.7	-30.7	NA	NA
TCGA-66-2789-01A-01T-0981-13	LUSC	MIR889	hsa-mir-889	chr14	+	3p	101047898	NA	flanking-5	NA	NA	-13	T	C	-30.7	-30.4	NA	NA
TCGA-D3-A3ML-06A-11R-A21E-13	SKCM	MIR889	hsa-mir-889	chr14	+	3p	101047896	NA	flanking-5	NA	NA	-15	C	T	-30.7	-31.4	NA	NA
TCGA-90-7766-01A-21H-2124-13	LUSC	MIR891A	hsa-mir-891a	chrX	-	5p	146027834	NA	loop	NA	7	NA	T	C	-42.7	-42.7	NA	NA
TCGA-EE-A20F-06A-21R-A18V-13	SKCM	MIR891A	hsa-mir-891a	chrX	-	5p	146027838	NA	loop	NA	3	NA	G	A	-42.7	-42.7	NA	NA
TCGA-69-7979-01A-11H-2186-13	LUAD	MIR891A	hsa-mir-891a	chrX	-	5p	146027786	NA	flanking-3	NA	NA	18	A	C	-42.7	-42.7	NA	NA
TCGA-GN-A26A-06A-11R-A18W-13	SKCM	MIR891A	hsa-mir-891a	chrX	-	5p	146027856	COSN5028507	seed_5p	7	NA	NA	C	T	-42.7	-43	NA	NA
TCGA-78-7220-01A-11H-2038-13	LUAD	MIR891A	hsa-mir-891a	chrX	-	5p	146027837	COSN24411811	loop	NA	4	NA	T	C	-42.7	-42.7	NA	NA
TCGA-CV-7568-01A-11R-2231-13	HNSC	MIR891A	hsa-mir-891a	chrX	-	5p	146027838	NA	loop	NA	3	NA	G	A	-42.7	-42.7	NA	NA
TCGA-44-6779-01A-11H-1857-13	LUAD	MIR891A	hsa-mir-891a	chrX	-	5p	146027800	COSN24409307	flanking-3	NA	NA	4	G	A	-42.7	-46.3	NA	NA
TCGA-56-6545-01A-11H-1819-13	LUSC	MIR891A	hsa-mir-891a	chrX	-	5p	146027826	COSN2378966	loop	NA	15	NA	G	T	-42.7	-39	NA	NA
TCGA-55-8092-01A-11H-2240-13	LUAD	MIR93	hsa-mir-93	chr7	-	5p	100093770	NA	flanking-3	NA	NA	7	G	A	-55.9	-53.3	NA	NA
TCGA-AG-A02N-01A-11R-A082-13	READ	MIR93	hsa-mir-93	chr7	-	5p	100093770	NA	flanking-3	NA	NA	7	G	A	-55.9	-53.3	NA	NA
TCGA-EE-A183-06A-11R-A18V-13	SKCM	MIR93	hsa-mir-93	chr7	-	5p	100093771	NA	flanking-3	NA	NA	6	G	A	-55.9	-52.9	NA	NA
TCGA-D1-A15Z-01A-11R-A119-13	UCEC	MIR934	hsa-mir-934	chrX	+	5p	136550885	COSN503046	flanking-5	NA	NA	-7	A	T	-56	-51.9	NA	NA
TCGA-2Y-A9HA-01A-11R-A39J-13	LIHC	MIR937	hsa-mir-937	chr8	-	3p	143812946	NA	flanking-3	NA	NA	25	G	A	-39.7	-39.7	NA	NA
TCGA-BT-A0YX-01A-11R-A10V-13	BLCA	MIR937	hsa-mir-937	chr8	-	3p	143812977	COSN8892581	non-seed duplex_3p	16	NA	NA	G	C	-39.7	-38	NA	NA
TCGA-46-6026-01A-11H-1819-13	LUSC	MIR939	hsa-mir-939	chr8	-	both	144394137	NA	flanking-3	NA	NA	24	T	C	-63.8	-63.8	NA	NA
TCGA-91-6829-01A-21H-1857-13	LUAD	MIR939	hsa-mir-939	chr8	-	both	144394234	NA	flanking-5	NA	NA	-18	C	G	-63.8	-65.6	NA	NA
TCGA-DD-A39Z-01A-11R-A214-13	LIHC	MIR939	hsa-mir-939	chr8	-	both	144394234	NA	flanking-5	NA	NA	-18	C	A	-63.8	-63.7	NA	NA
TCGA-CN-A49A-01A-11R-A24J-13	HNSC	MIR939	hsa-mir-939	chr8	-	both	144394155	NA	flanking-3	NA	NA	6	C	T	-63.8	-62.7	NA	NA
TCGA-D1-A0ZS-01A-11R-A119-13	UCEC	MIR942	hsa-mir-942	chr1	+	both	117094704	COSN494433	non-seed duplex_3p	10	NA	NA	G	A	-63.5	-63.8	NA	NA
TCGA-55-7907-01A-11H-2169-13	LUAD	MIR95	hsa-mir-95	chr4	-	3p	8005356	COSN24411288	non-seed duplex_5p	12	NA	NA	G	A	-40	-37.8	NA	NA
TCGA-BR-4256-01A-01R-1131-13	STAD	MIR95	hsa-mir-95	chr4	-	3p	8005340	COSN1083635	loop	NA	7	NA	G	A	-40	-40	NA	NA
TCGA-D1-A167-01A-11R-A12H-13	UCEC	MIR95	hsa-mir-95	chr4	-	3p	8005332	COSN1083636	seed_3p	2	NA	NA	A	G	-40	-35.9	NA	NA
TCGA-XK-AAK1-01A-11R-A41R-13	PRAD	MIR95	hsa-mir-95	chr4	-	3p	8005295	NA	flanking-3	NA	NA	17	G	A	-40	-40	NA	NA
TCGA-D9-A4Z3-01A-11R-A25Z-13	SKCM	MIR95	hsa-mir-95	chr4	-	3p	8005305	NA	flanking-3	NA	NA	7	G	A	-40	-40	NA	NA
TCGA-ED-A459-01A-11R-A25Z-13	LIHC	MIR98	hsa-mir-98	chrX	-	5p	53556227	NA	flanking-3	NA	NA	14	T	A	-58.6	-58.7	NA	NA
TCGA-5M-AAT6-01A-11H-A41D-13	COAD	MIR99A	hsa-mir-99a	chr21	+	5p	16539077	NA	flanking-5	NA	NA	-24	T	C	-48.7	-47	NA	NA
TCGA-G4-6628-01A-11H-1838-13	COAD	MIR99A	hsa-mir-99a	chr21	+	5p	16539135	NA	loop	NA	13	NA	G	A	-48.7	-49.1	NA	NA
TCGA-CK-5913-01A-11H-1652-13	COAD	MIR99A	hsa-mir-99a	chr21	+	5p	16539135	NA	loop	NA	13	NA	G	A	-48.7	-49.1	NA	NA
TCGA-ER-A19E-06A-11R-A18V-13	SKCM	MIR99B	hsa-mir-99b	chr19	+	5p	51692600	NA	flanking-5	NA	NA	-18	C	T	-48.5	-48.5	NA	NA
TCGA-BP-4987-01A-01R-1762-13	KIRC	MIR99B	hsa-mir-99b	chr19	+	5p	51692651	COSN2375503	loop	NA	12	NA	G	A	-48.5	-47.7	NA	NA
TCGA-LN-A4MQ-01A-11R-A28K-13	ESCA	MIR99B	hsa-mir-99b	chr19	+	5p	51692653	NA	loop	NA	14	NA	A	G	-48.5	-52.7	NA	NA
TCGA-G4-6304-01A-11H-1927-13	COAD	MIR99B	hsa-mir-99b	chr19	+	5p	51692648	COSN1082437	loop	NA	9	NA	G	A	-48.5	-48.5	NA	NA
TCGA-C8-A12K-01A-21R-A114-13	BRCA	MIRLET7B	hsa-let-7b	chr22	+	5p	46113723	NA	loop	NA	11	NA	G	A	-65.2	-65.2	NA	NA
TCGA-34-2600-01A-01T-1557-13	LUSC	MIRLET7C	hsa-let-7c	chr21	+	5p	16539908	COSN2378764	flanking-3	NA	NA	4	G	C	-48	-41.7	NA	NA
TCGA-AA-3833-01A-01T-0906-13	COAD	MIRLET7C	hsa-let-7c	chr21	+	5p	16539833	NA	flanking-5	NA	NA	-5	C	T	-48	-46.3	NA	NA
TCGA-AX-A2HJ-01A-11R-A17A-13	UCEC	MIRLET7D	hsa-let-7d	chr9	+	5p	94178817	NA	flanking-5	NA	NA	-24	GA	G	-50.1	-50.1	NA	NA
TCGA-DF-A2KY-01A-21R-A214-13	UCEC	MIRLET7D	hsa-let-7d	chr9	+	5p	94178817	NA	flanking-5	NA	NA	-24	GA	G	-50.1	-50.1	NA	NA
TCGA-D1-A0ZS-01A-11R-A119-13	UCEC	MIRLET7D	hsa-let-7d	chr9	+	5p	94178817	NA	flanking-5	NA	NA	-24	G	GA	-50.1	-50.1	NA	NA
TCGA-AX-A3FT-01A-11R-A22I-13	UCEC	MIRLET7D	hsa-let-7d	chr9	+	5p	94178817	NA	flanking-5	NA	NA	-24	GA	G	-50.1	-50.1	NA	NA
TCGA-DI-A0WH-01A-12R-A12H-13	UCEC	MIRLET7D	hsa-let-7d	chr9	+	5p	94178817	NA	flanking-5	NA	NA	-24	GA	G	-50.1	-50.1	NA	NA
TCGA-AP-A1DR-01A-11R-A136-13	UCEC	MIRLET7D	hsa-let-7d	chr9	+	5p	94178817	NA	flanking-5	NA	NA	-24	GA	G	-50.1	-50.1	NA	NA
TCGA-EO-A3AU-01A-21R-A19V-13	UCEC	MIRLET7D	hsa-let-7d	chr9	+	5p	94178817	NA	flanking-5	NA	NA	-24	GA	G	-50.1	-50.1	NA	NA
TCGA-VQ-A8PO-01A-11R-A415-13	STAD	MIRLET7D	hsa-let-7d	chr9	+	5p	94178817	NA	flanking-5	NA	NA	-24	GA	G	-50.1	-50.1	NA	NA
TCGA-AP-A1DM-01A-21R-A136-13	UCEC	MIRLET7D	hsa-let-7d	chr9	+	5p	94178817	NA	flanking-5	NA	NA	-24	GA	G	-50.1	-50.1	NA	NA
TCGA-VQ-AA6D-01A-11R-A415-13	STAD	MIRLET7D	hsa-let-7d	chr9	+	5p	94178817	NA	flanking-5	NA	NA	-24	GA	G	-50.1	-50.1	NA	NA
TCGA-AD-A5EJ-01A-11H-A28I-13	COAD	MIRLET7D	hsa-let-7d	chr9	+	5p	94178817	NA	flanking-5	NA	NA	-24	GA	G	-50.1	-50.1	NA	NA
TCGA-CM-6162-01A-11H-1652-13	COAD	MIRLET7D	hsa-let-7d	chr9	+	5p	94178817	NA	flanking-5	NA	NA	-24	GA	G	-50.1	-50.1	NA	NA
TCGA-BS-A0V4-01A-11R-A14C-13	UCEC	MIRLET7D	hsa-let-7d	chr9	+	5p	94178817	NA	flanking-5	NA	NA	-24	GA	G	-50.1	-50.1	NA	NA
TCGA-B5-A5OC-01A-21R-A27R-13	UCEC	MIRLET7D	hsa-let-7d	chr9	+	5p	94178817	NA	flanking-5	NA	NA	-24	GA	G	-50.1	-50.1	NA	NA
TCGA-AJ-A3BG-01A-11R-A19V-13	UCEC	MIRLET7D	hsa-let-7d	chr9	+	5p	94178817	NA	flanking-5	NA	NA	-24	GAA	G	-50.1	-50.1	NA	NA
TCGA-AX-A2HG-01A-11R-A17A-13	UCEC	MIRLET7D	hsa-let-7d	chr9	+	5p	94178817	NA	flanking-5	NA	NA	-24	GA	G	-50.1	-50.1	NA	NA
TCGA-BK-A13B-01A-51R-A22I-13	UCEC	MIRLET7D	hsa-let-7d	chr9	+	5p	94178817	NA	flanking-5	NA	NA	-24	G	GA	-50.1	-50.1	NA	NA
TCGA-EY-A2OP-01A-11R-A19V-13	UCEC	MIRLET7D	hsa-let-7d	chr9	+	5p	94178817	NA	flanking-5	NA	NA	-24	GA	G	-50.1	-50.1	NA	NA
TCGA-AX-A063-01A-11R-A00W-13	UCEC	MIRLET7D	hsa-let-7d	chr9	+	5p	94178817	NA	flanking-5	NA	NA	-24	GA	G	-50.1	-50.1	NA	NA
TCGA-IN-8462-01A-11R-2343-13	STAD	MIRLET7E	hsa-let-7e	chr19	+	5p	51692779	NA	flanking-5	NA	NA	-14	C	T	-56.3	-56.3	NA	NA
TCGA-BR-6566-01A-11R-1802-13	STAD	MIRLET7E	hsa-let-7e	chr19	+	5p	51692782	NA	flanking-5	NA	NA	-11	GC	G	-56.3	-55.3	NA	NA
TCGA-A6-5659-01A-01T-1652-13	COAD	MIRLET7E	hsa-let-7e	chr19	+	5p	51692878	NA	flanking-3	NA	NA	19	G	A	-56.3	-55.2	NA	NA
TCGA-96-A4JK-01A-11H-A25B-13	LUSC	MIRLET7E	hsa-let-7e	chr19	+	5p	51692882	NA	flanking-3	NA	NA	23	C	T	-56.3	-54.2	NA	NA
TCGA-DX-AB32-01A-11R-A41D-13	SARC	MIRLET7G	hsa-let-7g	chr3	-	5p	52268271	NA	flanking-3	NA	NA	9	C	T	-51.9	-47.53	NA	NA
TCGA-AQ-A0Y5-01A-11R-A14L-13	BRCA	MIRLET7G	hsa-let-7g	chr3	-	5p	52268316	COSN23016349	loop	NA	20	NA	G	C	-51.9	-51.9	NA	NA
TCGA-D1-A174-01A-11R-A12H-13	UCEC	MIRLET7I	hsa-let-7i	chr12	+	5p	62603773	NA	flanking-3	NA	NA	5	C	T	-54.8	-53.4	NA	NA
TCGA-K4-A5RJ-01A-11R-A28I-13	BLCA	MIRLET7I	hsa-let-7i	chr12	+	5p	62603732	NA	loop	NA	20	NA	CCG	C	-54.8	-53.9	NA	NA
