# Supplementary material for: miRNA gene mutations commonly disrupt the proper functioning of miRNA genes
Source: Research Square preprint supplement (doi:10.21203/rs.3.rs-7029847/v1), 2025-07-21
Supplement: Supplementary file 2 [file 1b57cad1e5a233f46744dca8.xlsx]

## Sheet: Supplementary Table S4
sample_ID	cancer_type	miRNA_gene	miRBase_ID	chromosome	miRNA_gene_orientation	miRNA_strand_balance	mutation_position	mutation_ID_COSMIC	mutation_subregion	pos_mut_mature_miRNA	pos_mut_loop	pos_mut_flank	reference_allele	alternative_allele	RPM+1_miRNA_mut	RPM+1_miRNA_wt_mean	FC_mut/wt	log2(FC_mut/wt)	one_sample_t-test_p -value	Bonferroni_corrected_one_sample_t-test_p-value	z-score	z-score_p-value	-log10(p-value)z-score	outlier
TCGA-53-7624-01A-11H-2065-13	LUAD	MIR518E	hsa-mir-518e	chr19	+	5p	53729922	NA	flanking-3	NA	NA	11	G	A	4920.33	2.57647	1909.72	10.8991	0	0	7.26614	3.69896e-13	12.4319	YES
TCGA-EE-A3AG-06A-31R-A18V-13	SKCM	MIR520A	hsa-mir-520a	chr19	+	both	53690978	NA	flanking-3	NA	NA	24	G	A	1156.48	2.13447	541.81	9.08164	2.66767e-298	1.81668e-295	4.6153	3.92534e-06	5.40612	YES
TCGA-DK-A1AC-01A-11R-A13X-13	BLCA	MIR523	hsa-mir-523	chr19	+	5p	53698419	COSN513937	non-seed duplex_5p	20	NA	NA	C	T	586.321	5.36124	109.363	6.77298	6.26857e-201	4.26889e-198	2.93653	0.00331907	2.47898	YES
TCGA-44-7667-01A-31H-2065-13	LUAD	MIR483	hsa-mir-483	chr11	-	both	2134174	COSN24409740	loop	NA	7	NA	G	T	106.528	2.15639	49.401	5.62647	0	0	4.24264	2.20909e-05	4.65579	YES
TCGA-D9-A1JX-06A-11R-A18V-13	SKCM	MIR520A	hsa-mir-520a	chr19	+	both	53690957	COSN15625239	flanking-3	NA	NA	3	C	T	50.7822	2.13447	23.7914	4.57237	3.05566e-179	2.0809e-176	2.32368	0.0201426	1.69588	YES
TCGA-BR-8361-01A-11R-2343-13	STAD	MIR147B	hsa-mir-147b	chr15	+	3p	45433140	NA	flanking-3	NA	NA	22	AT	A	77.8241	4.68434	16.6137	4.0543	2.17816e-214	1.48332e-211	3.02888	0.0024546	2.61002	YES
TCGA-EE-A182-06A-11R-A18W-13	SKCM	MIR519D	hsa-mir-519d	chr19	+	3p	53713381	COSN5028201	non-seed duplex_5p	21	NA	NA	C	T	22.718	1.52768	14.871	3.89443	5.43001e-202	3.69784e-199	2.61229	0.00899381	2.04606	YES
TCGA-DK-A1AC-01A-11R-A13X-13	BLCA	MIR520F	hsa-mir-520f	chr19	+	3p	53682157	NA	flanking-5	NA	NA	-16	G	T	21.3598	1.56346	13.6619	3.77208	7.80689e-198	5.31649e-195	2.8792	0.00398691	2.39936	YES
TCGA-93-7348-01A-21H-2038-13	LUAD	MIR134	hsa-mir-134	chr14	+	5p	101054684	NA	flanking-5	NA	NA	-10	G	A	2324.15	180.967	12.843	3.68291	2.80799e-233	1.91224e-230	2.66711	0.00765066	2.1163	YES
TCGA-EE-A29P-06A-11R-A18W-13	SKCM	MIR520F	hsa-mir-520f	chr19	+	3p	53682244	NA	flanking-3	NA	NA	10	G	A	18.9849	1.50192	12.6404	3.65997	1.96328e-187	1.33699e-184	2.3888	0.0169034	1.77203	YES
TCGA-13-0904-01A-02R-1564-13	OV	MIR100	hsa-mir-100	chr11	-	5p	122152219	NA	flanking-3	NA	NA	21	C	T	72560.7	6186.97	11.728	3.55188	1.88705e-236	1.28508e-233	2.85494	0.0043045	2.36608	YES
TCGA-37-3789-01A-01T-0981-13	LUSC	MIR495	hsa-mir-495	chr14	+	3p	101033788	COSN2378433	non-seed duplex_5p	21	NA	NA	C	T	55.7895	6.03933	9.23769	3.20753	4.4622e-225	3.03876e-222	2.85772	0.00426693	2.36988	YES
TCGA-EE-A2A2-06A-11R-A18W-13	SKCM	MIR320A	hsa-mir-320a	chr8	-	3p	22245033	NA	flanking-5	NA	NA	-5	G	A	16983.4	2306.36	7.36374	2.88044	3.07048e-252	2.091e-249	3.48231	0.000497113	3.30355	YES
TCGA-BR-4362-01A-01R-1157-13	STAD	MIR6720	hsa-mir-6720	chr6	-	both	1390312	NA	flanking-3	NA	NA	12	C	T	11.6831	1.93187	6.04755	2.59635	3.50448e-236	2.38655e-233	3.44001	0.000581699	3.2353	YES
TCGA-78-7536-01A-11H-2065-13	LUAD	MIR340	hsa-mir-340	chr5	-	5p	180015350	COSN24411365	loop	NA	11	NA	C	T	91.2142	23.538	3.87519	1.95427	2.01961e-280	1.37536e-277	3.38194	0.00071977	3.14281	YES
TCGA-G3-A25T-01A-11R-A16S-13	LIHC	MIR200A	hsa-mir-200a	chr1	+	3p	1167904	COSN16303208	loop	NA	5	NA	C	G	2511.83	54.8057	45.8316	5.51827	2.69452e-153	1.83497e-150	2.37788	0.0174124	1.75914	NO
TCGA-D3-A8GO-06A-11R-A37G-13	SKCM	MIR335	hsa-mir-335	chr7	+	5p	130496140	COSN23016863	non-seed duplex_5p	15	NA	NA	G	A	496.883	25.3892	19.5706	4.29062	2.49134e-187	1.6966e-184	2.38731	0.0169721	1.77026	NO
TCGA-18-5595-01A-01T-1634-13	LUSC	MIR205	hsa-mir-205	chr1	+	5p	209432167	COSN2378349	seed_5p	2	NA	NA	C	T	121700	10272	11.8477	3.56654	2.75184e-158	1.87401e-155	1.92047	0.054798	1.26124	NO
TCGA-20-0991-01A-01R-1564-13	OV	MIR522	hsa-mir-522	chr19	+	3p	53751223	NA	flanking-5	NA	NA	-3	T	A	100.663	9.71708	10.3594	3.37286	1.30195e-138	8.86627e-136	1.62489	0.104185	0.982194	NO
TCGA-R6-A6XG-01B-11R-A337-13	ESCA	MIR200A	hsa-mir-200a	chr1	+	3p	1167908	NA	loop	NA	9	NA	C	T	8908.24	1139.58	7.81711	2.96663	3.85127e-66	2.62271e-63	2.02562	0.0428038	1.36852	NO
TCGA-HT-7476-01A-11R-2026-13	LGG	MIR323A	hsa-mir-323a	chr14	+	3p	101025761	COSN20052415	non-seed duplex_5p	15	NA	NA	G	A	243.453	34.3179	7.09407	2.82661	8.7971e-161	5.99083e-158	1.73361	0.0829871	1.08099	NO
TCGA-78-7155-01A-11H-2038-13	LUAD	MIR196B	hsa-mir-196b	chr7	-	5p	27169485	NA	flanking-3	NA	NA	8	G	A	220.368	32.4759	6.7856	2.76248	2.01659e-107	1.3733e-104	1.26704	0.205141	0.687947	NO
TCGA-EE-A2GH-06A-11R-A18W-13	SKCM	MIR517B	hsa-mir-517b	chr19	+	3p	53721120	COSN2378634	seed_3p	3	NA	NA	C	T	13.9693	2.07565	6.73007	2.75062	1.95894e-111	1.33404e-108	1.44526	0.148384	0.828612	NO
TCGA-DK-A6AV-01A-12R-A30J-13	BLCA	MIR520A	hsa-mir-520a	chr19	+	both	53690974	NA	flanking-3	NA	NA	20	C	T	14.1347	2.13935	6.607	2.72399	1.40163e-108	9.54507e-106	1.54021	0.12351	0.908298	NO
TCGA-XV-A9W5-01A-11R-A38N-13	SKCM	MIR205	hsa-mir-205	chr1	+	5p	209432167	COSN2378349	seed_5p	2	NA	NA	C	T	78.936	12.0918	6.52808	2.70666	0.301605	1	0.732999	0.463619	0.333839	NO
TCGA-EE-A2GI-06A-11R-A18W-13	SKCM	MIR205	hsa-mir-205	chr1	+	5p	209432167	COSN2378349	seed_5p	2	NA	NA	C	T	78.936	12.0918	6.52808	2.70666	0.301605	1	0.732999	0.463619	0.333839	NO
TCGA-80-5611-01A-01T-1627-13	LUAD	MIR6510	hsa-mir-6510	chr17	-	3p	41517144	NA	flanking-3	NA	NA	22	T	G	22.051	3.45754	6.37766	2.67303	2.92808e-171	1.99402e-168	1.90423	0.0568798	1.24504	NO
TCGA-VR-A8EW-01A-11R-A36E-13	ESCA	MIR205	hsa-mir-205	chr1	+	5p	209432147	NA	flanking-5	NA	NA	-19	AAT	A	6485.74	1079.75	6.0067	2.58657	3.95792e-15	2.69534e-12	0.636711	0.524313	0.280409	NO
TCGA-B5-A0JS-01A-11R-A103-13	UCEC	MIR106A	hsa-mir-106a	chrX	-	5p	134170270	COSN2383038	flanking-5	NA	NA	-4	T	G	129.482	21.7005	5.96677	2.57695	1.30977e-190	8.91951e-188	2.0653	0.0388942	1.41012	NO
TCGA-DD-AADJ-01A-11R-A41H-13	LIHC	MIR372	hsa-mir-372	chr19	+	3p	53787973	NA	flanking-3	NA	NA	20	A	G	10.422	1.77413	5.87442	2.55445	3.20685e-104	2.18387e-101	1.61559	0.106183	0.973946	NO
TCGA-QK-A8Z8-01A-11R-A39B-13	HNSC	MIR519C	hsa-mir-519c	chr19	+	both	53686464	NA	flanking-5	NA	NA	-20	G	A	26.7684	4.80394	5.57217	2.47824	5.57758e-147	3.79833e-144	1.62428	0.104317	0.981645	NO
TCGA-DF-A2KV-01A-11R-A17X-13	UCEC	MIR449B	hsa-mir-449b	chr5	-	5p	55170654	NA	flanking-3	NA	NA	13	T	G	29.8473	5.47351	5.45305	2.44706	2.27201e-88	1.54724e-85	1.06889	0.285117	0.544977	NO
TCGA-D3-A8GQ-06A-11R-A37G-13	SKCM	MIR494	hsa-mir-494	chr14	+	3p	101029657	COSN1080995	non-seed duplex_5p	10	NA	NA	G	A	11.4227	2.10583	5.4243	2.43944	2.13202e-187	1.4519e-184	2.40635	0.016113	1.79282	NO
TCGA-34-2600-01A-01T-1557-13	LUSC	MIRLET7C	hsa-let-7c	chr21	+	5p	16539908	COSN2378764	flanking-3	NA	NA	4	G	C	7376.57	1387.69	5.31573	2.41027	2.97965e-192	2.02914e-189	2.35818	0.0183649	1.73601	NO
TCGA-KL-8326-01A-11R-2314-13	KICH	MIR193B	hsa-mir-193b	chr16	+	3p	14303955	NA	flanking-5	NA	NA	-25	C	CT	123.076	24.4695	5.02979	2.3305	9.87379e-20	6.72405e-17	1.64441	0.100091	0.999604	NO
TCGA-EE-A2MD-06A-11R-A18W-13	SKCM	MIR204	hsa-mir-204	chr9	-	5p	70810071	NA	flanking-5	NA	NA	-19	G	A	244.266	48.8655	4.99874	2.32157	8.38088e-56	5.70738e-53	0.861304	0.389071	0.409971	NO
TCGA-BF-A3DM-01A-11R-A20E-13	SKCM	MIR1226	hsa-mir-1226	chr3	+	3p	47849594	NA	loop	NA	14	NA	C	T	54.0905	11.1289	4.86038	2.28107	5.16919e-173	3.52022e-170	2.18703	0.0287402	1.54151	NO
TCGA-IR-A3LI-01A-11R-A214-13	CESC	MIR376C	hsa-mir-376c	chr14	+	3p	101039762	NA	flanking-3	NA	NA	10	C	T	27.5534	5.84929	4.71056	2.2359	1.68308e-114	1.14618e-111	2.12399	0.0336712	1.47274	NO
TCGA-BT-A0YX-01A-11R-A10V-13	BLCA	MIR520A	hsa-mir-520a	chr19	+	both	53690923	COSN2376740	loop	NA	8	NA	G	C	9.52925	2.13935	4.45428	2.15519	8.37615e-82	5.70416e-79	1.21859	0.222999	0.651698	NO
TCGA-DK-A1AC-01A-11R-A13X-13	BLCA	MIR142	hsa-mir-142	chr17	-	both	58331272	COSN513890	loop	NA	11	NA	C	T	4500.24	1024.01	4.39471	2.13577	2.12976e-120	1.45036e-117	1.68704	0.0915951	1.03813	NO
TCGA-60-2713-01A-01T-1557-13	LUSC	MIR154	hsa-mir-154	chr14	+	both	101059752	NA	flanking-5	NA	NA	-17	C	G	28.3255	6.51126	4.35023	2.12109	4.17945e-165	2.8462e-162	2.00385	0.0450864	1.34595	NO
TCGA-93-8067-01A-11H-2286-13	LUAD	MIR1247	hsa-mir-1247	chr14	-	5p	101560306	NA	flanking-3	NA	NA	20	G	A	58.2799	13.5651	4.29631	2.1031	1.23389e-121	8.40281e-119	1.39934	0.161712	0.791257	NO
TCGA-64-5779-01A-01T-1627-13	LUAD	MIR196B	hsa-mir-196b	chr7	-	5p	27169521	COSN24409123	loop	NA	7	NA	G	T	138.908	32.4759	4.27728	2.09669	4.49907e-74	3.06387e-71	0.961672	0.336215	0.473384	NO
TCGA-B0-5096-01A-01R-1419-13	KIRC	MIR222	hsa-mir-222	chrX	-	3p	45747065	COSN2377957	loop	NA	8	NA	C	T	213.197	51.3334	4.15319	2.05422	5.40818e-181	3.68297e-178	2.05415	0.0399609	1.39837	NO
TCGA-EE-A2M5-06A-12R-A18V-13	SKCM	MIR127	hsa-mir-127	chr14	+	3p	100883041	COSM3493809	seed_3p	7	NA	NA	C	T	1783.68	445.608	4.00281	2.00101	3.47056e-83	2.36345e-80	1.14404	0.252609	0.597552	NO
TCGA-69-7979-01A-11H-2186-13	LUAD	MIR296	hsa-mir-296	chr20	-	both	58817665	COSN24410955	non-seed duplex_5p	17	NA	NA	G	A	26.5894	6.66444	3.98975	1.9963	3.05527e-162	2.08064e-159	1.81323	0.0697962	1.15617	NO
TCGA-CV-5443-01A-01R-1513-13	HNSC	MIR148A	hsa-mir-148a	chr7	-	3p	25949998	NA	flanking-5	NA	NA	-17	C	T	96535.9	24333.2	3.96726	1.98814	6.16397e-192	4.19766e-189	2.09684	0.0360076	1.44361	NO
TCGA-CV-A45P-01A-11R-A24J-13	HNSC	MIR363	hsa-mir-363	chrX	-	3p	134169360	NA	flanking-3	NA	NA	22	C	T	64.1633	16.1907	3.96297	1.98658	3.99318e-134	2.71935e-131	1.49568	0.134738	0.870509	NO
TCGA-FR-A8YC-06A-11R-A37G-13	SKCM	MIR517A	hsa-mir-517a	chr19	+	3p	53712351	NA	flanking-3	NA	NA	9	G	A	8.23495	2.08445	3.95067	1.9821	5.31404e-73	3.61886e-70	1.04038	0.298163	0.525547	NO
TCGA-FS-A4F0-06A-11R-A24Y-13	SKCM	MIR598	hsa-mir-598	chr8	-	3p	11035250	NA	loop	NA	7	NA	A	G	125.157	31.8825	3.92558	1.97291	5.52808e-98	3.76462e-95	1.30191	0.192947	0.714563	NO
TCGA-CN-A497-01A-11R-A24J-13	HNSC	MIR6510	hsa-mir-6510	chr17	-	3p	41517236	NA	flanking-5	NA	NA	-21	GC	G	47.3795	12.0822	3.92144	1.97139	1.01215e-89	6.89271e-87	1.08685	0.277105	0.557356	NO
TCGA-FU-A3HZ-01A-11R-A214-13	CESC	MIR539	hsa-mir-539	chr14	+	both	101047341	COSN16130627	non-seed duplex_5p	13	NA	NA	C	T	13.9798	3.58311	3.90159	1.96406	7.73356e-117	5.26656e-114	2.17035	0.0299807	1.52316	NO
TCGA-G2-A3IE-01A-11R-A20E-13	BLCA	MIR200A	hsa-mir-200a	chr1	+	3p	1167903	COSN513603	loop	NA	4	NA	C	T	1385.89	362.186	3.82647	1.93601	1.91209e-85	1.30213e-82	1.25864	0.208159	0.681605	NO
TCGA-44-7667-01A-31H-2065-13	LUAD	MIR4746	hsa-mir-4746	chr19	+	5p	4446016	COSN6552656	loop	NA	7	NA	G	A	12.7774	3.35344	3.81023	1.92988	1.47493e-200	1.00443e-197	2.24322	0.0248824	1.60411	NO
TCGA-2Y-A9H0-01A-11R-A38M-13	LIHC	MIR425	hsa-mir-425	chr3	-	5p	49020234	NA	flanking-5	NA	NA	-13	C	G	626.646	164.539	3.80849	1.92922	2.05336e-144	1.39834e-141	2.22557	0.0260432	1.5843	NO
TCGA-D3-A51T-06A-11R-A25Z-13	SKCM	MIR525	hsa-mir-525	chr19	+	both	53697530	NA	flanking-5	NA	NA	-17	G	A	7.17299	1.89201	3.79121	1.92266	3.87564e-68	2.63931e-65	0.996407	0.319052	0.496138	NO
TCGA-W3-AA1R-06A-11R-A39J-13	SKCM	MIR520A	hsa-mir-520a	chr19	+	both	53690960	NA	flanking-3	NA	NA	6	T	C	7.882	2.13447	3.69271	1.88468	3.81285e-64	2.59655e-61	0.957796	0.338166	0.470871	NO
TCGA-XU-A930-01A-11R-A42W-13	THYM	MIR205	hsa-mir-205	chr1	+	5p	209432227	NA	flanking-3	NA	NA	4	A	AGG	61519.2	17029.1	3.61259	1.85303	1.7342e-38	1.18099e-35	1.72302	0.0848844	1.07117	NO
TCGA-AP-A1E1-01A-11R-A136-13	UCEC	MIR660	hsa-mir-660	chrX	+	5p	50013284	NA	loop	NA	7	NA	C	T	198.377	55.6728	3.56326	1.8332	4.51394e-224	3.07399e-221	2.4642	0.013732	1.86227	NO
TCGA-86-7711-01A-11H-2065-13	LUAD	MIR31	hsa-mir-31	chr9	-	5p	21512109	NA	flanking-3	NA	NA	12	C	T	32.6675	9.24438	3.53377	1.82121	1.02814e-62	7.00164e-60	0.855931	0.392036	0.406674	NO
TCGA-BT-A0YX-01A-11R-A10V-13	BLCA	MIR205	hsa-mir-205	chr1	+	5p	209432226	COSN8407113	flanking-3	NA	NA	3	G	C	6226.03	1772.89	3.51181	1.81221	5.83154e-50	3.97128e-47	0.853951	0.393132	0.405461	NO
TCGA-BR-4370-01A-01R-1157-13	STAD	MIR1247	hsa-mir-1247	chr14	-	5p	101560306	NA	flanking-3	NA	NA	20	G	A	41.9267	11.9642	3.50434	1.80914	6.10208e-64	4.15551e-61	0.98341	0.325406	0.487575	NO
TCGA-FU-A2QG-01A-11R-A18L-13	CESC	MIR205	hsa-mir-205	chr1	+	5p	209432167	COSN2378349	seed_5p	2	NA	NA	C	T	24901.5	7146.87	3.48426	1.80085	1.04143e-28	7.09213e-26	0.710585	0.477341	0.321171	NO
TCGA-A6-2686-01A-01T-1409-13	COAD	MIR190A	hsa-mir-190a	chr15	+	5p	62824049	NA	flanking-3	NA	NA	21	CG	C	17.841	5.39776	3.30525	1.72476	7.16447e-162	4.87901e-159	2.11685	0.0342724	1.46506	NO
TCGA-G4-6303-01A-11H-1773-13	COAD	MIR424	hsa-mir-424	chrX	-	5p	134546635	NA	flanking-3	NA	NA	9	C	T	257.597	79.2547	3.25024	1.70054	6.06968e-146	4.13345e-143	1.90851	0.0563251	1.2493	NO
TCGA-FR-A8YC-06A-11R-A37G-13	SKCM	MIR342	hsa-mir-342	chr14	+	3p	100109729	COSN1080961	non-seed duplex_3p	15	NA	NA	C	T	840.397	263.446	3.19001	1.67356	0.0604063	1	1.33499	0.181909	0.740146	NO
TCGA-D9-A149-06A-11R-A18V-13	SKCM	MIR342	hsa-mir-342	chr14	+	3p	100109729	COSN1080961	non-seed duplex_3p	15	NA	NA	C	T	840.397	263.446	3.19001	1.67356	0.0604063	1	1.33499	0.181909	0.740146	NO
TCGA-XU-A92U-01A-11R-A42W-13	THYM	MIR519E	hsa-mir-519e	chr19	+	3p	53679977	NA	loop	NA	3	NA	T	C	15.4346	4.84004	3.18894	1.67308	3.1794e-13	2.16517e-10	0.737209	0.460995	0.336304	NO
TCGA-D1-A176-01A-11R-A12H-13	UCEC	MIR34C	hsa-mir-34c	chr11	+	5p	111513427	NA	flanking-5	NA	NA	-24	AT	A	78.6412	24.6993	3.18394	1.67081	3.24748e-40	2.21153e-37	0.633422	0.526458	0.278636	NO
TCGA-E2-A158-01A-11R-A12C-13	BRCA	MIR522	hsa-mir-522	chr19	+	3p	53751275	COSN23015440	non-seed duplex_3p	12	NA	NA	C	G	9.73196	3.06162	3.1787	1.66844	1.70528e-184	1.16129e-181	1.09101	0.275269	0.560242	NO
TCGA-A2-A04W-01A-31R-A114-13	BRCA	MIR369	hsa-mir-369	chr14	+	3p	101065634	COSN23014475	loop	NA	7	NA	G	A	28.0333	9.00938	3.11157	1.63764	0	0	1.76466	0.0776203	1.11002	NO
TCGA-B0-5095-01A-01R-1419-13	KIRC	MIR136	hsa-mir-136	chr14	+	both	100884745	COSM469664	loop	NA	7	NA	T	C	25.9513	8.55715	3.0327	1.6006	5.10521e-127	3.47665e-124	1.47324	0.140687	0.851745	NO
TCGA-NC-A5HR-01A-21H-A26V-13	LUSC	MIR223	hsa-mir-223	chrX	+	3p	66018971	NA	flanking-3	NA	NA	13	G	T	1251.99	415.535	3.01294	1.59117	2.72199e-102	1.85367e-99	1.30405	0.192217	0.716208	NO
TCGA-D1-A3DH-01A-11R-A19V-13	UCEC	MIR10B	hsa-mir-10b	chr2	+	5p	176150317	NA	flanking-5	NA	NA	-12	G	A	284352	99018.2	2.87171	1.52191	3.91918e-135	2.66896e-132	1.49554	0.134773	0.870398	NO
TCGA-L5-A4OU-01A-11R-A28K-13	ESCA	MIR25	hsa-mir-25	chr7	-	3p	100093647	NA	flanking-5	NA	NA	-17	C	T	29094.4	10135.9	2.87043	1.52127	4.87158e-55	3.31754e-52	1.68832	0.0913496	1.03929	NO
TCGA-70-6723-01A-11H-1819-13	LUSC	MIR10B	hsa-mir-10b	chr2	+	5p	176150376	COSN2378653	non-seed duplex_3p	9	NA	NA	G	A	21537.5	7701.29	2.79661	1.48368	8.22565e-88	5.60166e-85	1.15565	0.247826	0.605854	NO
TCGA-BG-A0YV-01A-11R-A10I-13	UCEC	MIR130A	hsa-mir-130a	chr11	+	3p	57641279	COSN2381402	flanking-3	NA	NA	6	G	A	418.124	150.438	2.77938	1.47476	2.59897e-122	1.7699e-119	1.37491	0.169161	0.771701	NO
TCGA-FU-A3HZ-01A-11R-A214-13	CESC	MIR369	hsa-mir-369	chr14	+	3p	101065639	COSN1080976	loop	NA	12	NA	C	T	22.545	8.24932	2.73295	1.45046	1.36537e-70	9.29819e-68	1.3533	0.175959	0.754589	NO
TCGA-ER-A193-06A-12R-A18V-13	SKCM	MIR136	hsa-mir-136	chr14	+	both	100884719	COSM3493815	seed_5p	4	NA	NA	C	T	17.4612	6.56462	2.65989	1.41137	3.52314e-65	2.39926e-62	0.959688	0.337212	0.472096	NO
TCGA-ZN-A9VQ-01A-11R-A404-13	MESO	MIR182	hsa-mir-182	chr7	-	5p	129770387	NA	flanking-3	NA	NA	19	C	T	17641.6	6651.19	2.6524	1.4073	2.11254e-11	1.43864e-08	0.831937	0.405445	0.392068	NO
TCGA-CD-5801-01A-11R-1602-13	STAD	MIR34C	hsa-mir-34c	chr11	+	5p	111513448	NA	flanking-5	NA	NA	-3	A	G	13.063	4.93545	2.64676	1.40423	1.17599e-142	8.00852e-140	1.90477	0.0568098	1.24558	NO
TCGA-BA-6871-01A-11R-1872-13	HNSC	MIR134	hsa-mir-134	chr14	+	5p	101054677	NA	flanking-5	NA	NA	-17	C	G	783.327	298.058	2.6281	1.39402	6.87284e-111	4.6804e-108	1.2778	0.201322	0.69611	NO
TCGA-D1-A174-01A-11R-A12H-13	UCEC	MIR497	hsa-mir-497	chr17	-	5p	7017924	NA	flanking-3	NA	NA	14	TC	T	123.427	47.2535	2.61201	1.38516	2.36718e-97	1.61205e-94	1.14691	0.251419	0.599601	NO
TCGA-A5-A0GP-01A-11R-A041-13	UCEC	MIR10B	hsa-mir-10b	chr2	+	5p	176150342	COSN1082679	non-seed duplex_5p	14	NA	NA	C	T	258901	99130.5	2.61172	1.385	7.82878e-121	5.3314e-118	1.36121	0.173447	0.760832	NO
TCGA-5M-AAT6-01A-11H-A41D-13	COAD	MIR99A	hsa-mir-99a	chr21	+	5p	16539077	NA	flanking-5	NA	NA	-24	T	C	398.992	153.447	2.60019	1.37862	3.0564e-82	2.08141e-79	1.1653	0.243899	0.61279	NO
TCGA-XF-AAMX-01A-11R-A42V-13	BLCA	MIR188	hsa-mir-188	chrX	+	5p	50003590	NA	flanking-3	NA	NA	14	C	T	13.0251	5.01178	2.59889	1.3779	1.44142e-104	9.81604e-102	1.4873	0.136935	0.863487	NO
TCGA-55-7574-01A-11H-2038-13	LUAD	MIR379	hsa-mir-379	chr14	+	5p	101022151	NA	flanking-3	NA	NA	21	C	T	1063.43	411.183	2.58627	1.37087	1.09617e-82	7.4649e-80	1.04276	0.297058	0.527158	NO
TCGA-D3-A51F-06A-11R-A25Z-13	SKCM	MIR6842	hsa-mir-6842	chr8	+	3p	27433458	NA	flanking-3	NA	NA	24	C	T	18.8848	7.31909	2.58021	1.36749	7.51233e-132	5.1159e-129	1.68044	0.0928724	1.03211	NO
TCGA-AP-A0LS-01A-11R-A14C-13	UCEC	MIR1468	hsa-mir-1468	chrX	-	5p	63786098	NA	flanking-5	NA	NA	-23	TC	T	26.9185	10.8782	2.47453	1.30715	2.72197e-104	1.85366e-101	1.20882	0.226731	0.644488	NO
TCGA-DD-A1EK-01A-11R-A214-13	LIHC	MIR502	hsa-mir-502	chrX	+	3p	50014594	NA	flanking-5	NA	NA	-19	G	A	34.5692	13.985	2.47188	1.30561	3.26927e-124	2.22638e-121	1.89797	0.0577	1.23882	NO
TCGA-ED-A459-01A-11R-A25Z-13	LIHC	MIR98	hsa-mir-98	chrX	-	5p	53556227	NA	flanking-3	NA	NA	14	T	A	160.992	65.7169	2.44979	1.29266	1.48081e-100	1.00843e-97	1.55712	0.119441	0.922846	NO
TCGA-G3-A25S-01A-11R-A16S-13	LIHC	MIR629	hsa-mir-629	chr15	-	5p	70079433	COSN16303140	non-seed duplex_5p	15	NA	NA	C	A	159.735	66.7182	2.39417	1.25952	9.82899e-57	6.69354e-54	0.992856	0.32078	0.493792	NO
TCGA-29-1762-01A-01R-1567-13	OV	MIR195	hsa-mir-195	chr17	-	5p	7017648	COSN518969	seed_3p	2	NA	NA	G	C	40.3896	17.1661	2.35286	1.23442	2.25691e-96	1.53696e-93	1.19866	0.230659	0.63703	NO
TCGA-BR-A4QL-01A-31R-A252-13	STAD	MIR503	hsa-mir-503	chrX	-	5p	134546399	NA	flanking-5	NA	NA	-6	C	T	19.8671	8.50807	2.33509	1.22348	1.93976e-82	1.32098e-79	1.18395	0.236434	0.62629	NO
TCGA-ER-A3PL-06A-11R-A23A-13	SKCM	MIR510	hsa-mir-510	chrX	-	both	147272414	NA	flanking-5	NA	NA	-15	T	C	11.2522	4.82712	2.33104	1.22098	7.50934e-41	5.11386e-38	0.700811	0.483421	0.315674	NO
TCGA-DA-A95V-06A-11R-A37G-13	SKCM	MIR513C	hsa-mir-513c	chrX	-	both	147189702	NA	flanking-3	NA	NA	15	C	A	60.2829	25.8936	2.3281	1.21916	1.38207e-19	9.4119e-17	0.44785	0.654262	0.184248	NO
TCGA-OR-A5KZ-01A-11R-A29W-13	ACC	MIR149	hsa-mir-149	chr2	+	5p	240456086	NA	flanking-3	NA	NA	10	T	C	141.411	61.5853	2.29619	1.19924	0.249677	1	0.825554	0.409088	0.388183	NO
TCGA-OR-A5K1-01A-11R-A29W-13	ACC	MIR149	hsa-mir-149	chr2	+	5p	240456086	NA	flanking-3	NA	NA	10	T	C	141.411	61.5853	2.29619	1.19924	0.249677	1	0.825554	0.409088	0.388183	NO
TCGA-LN-A49L-01A-11R-A24L-13	ESCA	MIR106B	hsa-mir-106b	chr7	-	5p	100094029	NA	loop	NA	14	NA	C	T	1586.11	691.205	2.2947	1.1983	3.32178e-44	2.26213e-41	1.3878	0.165198	0.781995	NO
TCGA-FR-A8YC-06A-11R-A37G-13	SKCM	MIR598	hsa-mir-598	chr8	-	3p	11035210	NA	flanking-3	NA	NA	11	G	A	72.5547	31.8825	2.27569	1.1863	3.27124e-48	2.22771e-45	0.782836	0.433723	0.362787	NO
TCGA-D5-6540-01A-11H-1722-13	COAD	MIR511	hsa-mir-511	chr10	+	3p	17845111	NA	flanking-5	NA	NA	-11	A	T	24.8424	11.1075	2.23654	1.16127	1.79315e-93	1.22113e-90	1.28317	0.199434	0.7002	NO
TCGA-D8-A1JK-01A-11R-A13P-13	BRCA	MIR589	hsa-mir-589	chr7	-	5p	5495844	COSN23017036	non-seed duplex_3p	14	NA	NA	G	C	130.391	59.5319	2.19028	1.13111	2.93748e-274	2.00042e-271	1.48829	0.136674	0.864314	NO
TCGA-AM-5821-01A-01T-1652-13	COAD	MIR642A	hsa-mir-642a	chr19	+	both	45674968	NA	loop	NA	4	NA	TG	T	11.7193	5.37668	2.17966	1.1241	6.60889e-74	4.50065e-71	1.07212	0.283665	0.547194	NO
TCGA-D3-A5GL-06A-11R-A27U-13	SKCM	MIR379	hsa-mir-379	chr14	+	5p	101022139	NA	flanking-3	NA	NA	9	C	T	780.705	361.048	2.16233	1.11259	6.18861e-33	4.21445e-30	0.615064	0.538513	0.268804	NO
TCGA-FA-A86F-01A-11R-A38N-13	DLBC	MIR221	hsa-mir-221	chrX	-	3p	45746162	NA	flanking-3	NA	NA	18	C	T	425.521	198.607	2.14253	1.09931	5.66971e-08	3.86107e-05	0.958128	0.337998	0.471086	NO
TCGA-DK-A1AC-01A-11R-A13X-13	BLCA	MIR25	hsa-mir-25	chr7	-	3p	100093572	COSN514173	non-seed duplex_3p	21	NA	NA	C	T	23001.6	10987.2	2.0935	1.06592	7.61579e-89	5.18635e-86	1.29848	0.194123	0.711922	NO
TCGA-NH-A50V-01A-11H-A28I-13	COAD	MIR708	hsa-mir-708	chr11	-	5p	79402008	NA	flanking-3	NA	NA	24	T	A	102.505	49.3925	2.07532	1.05334	6.11541e-96	4.1646e-93	1.3127	0.189283	0.722889	NO
TCGA-ER-A19E-06A-11R-A18V-13	SKCM	MIR99B	hsa-mir-99b	chr19	+	5p	51692600	NA	flanking-5	NA	NA	-18	C	T	105748	51208.2	2.06505	1.04618	1.07758e-76	7.33832e-74	1.07681	0.281563	0.550424	NO
TCGA-YD-A9TA-06A-11R-A39J-13	SKCM	MIR381	hsa-mir-381	chr14	+	3p	101045996	NA	flanking-3	NA	NA	7	C	T	38.2327	18.7256	2.04173	1.02979	5.2035e-35	3.54358e-32	0.640455	0.521877	0.282432	NO
TCGA-D1-A1NZ-01A-21R-A14C-13	UCEC	MIR192	hsa-mir-192	chr11	-	5p	64891144	NA	flanking-3	NA	NA	15	T	C	2028.77	999.176	2.03045	1.0218	2.93885e-55	2.00135e-52	0.773956	0.438957	0.357578	NO
TCGA-B7-5816-01A-21R-1602-13	STAD	MIR452	hsa-mir-452	chrX	-	5p	151959620	NA	flanking-3	NA	NA	14	G	T	65.6913	32.4398	2.02502	1.01793	8.11817e-48	5.52848e-45	0.805174	0.420719	0.376008	NO
TCGA-CG-5734-01A-11R-1602-13	STAD	MIR369	hsa-mir-369	chr14	+	3p	101065611	COSN23023779	seed_5p	6	NA	NA	G	A	21.2365	10.5419	2.01449	1.01041	7.29788e-83	4.96985e-80	1.19076	0.233748	0.631252	NO
TCGA-D1-A167-01A-11R-A12H-13	UCEC	MIR4746	hsa-mir-4746	chr19	+	5p	4446056	NA	flanking-3	NA	NA	15	C	T	11.3994	5.73677	1.98707	0.990645	6.87031e-84	4.67868e-81	1.02796	0.303967	0.517173	NO
TCGA-G4-6315-01A-11H-1722-13	COAD	MIR345	hsa-mir-345	chr14	+	5p	100307851	NA	flanking-5	NA	NA	-25	A	C	43.1192	21.7739	1.98031	0.985729	5.04946e-81	3.43868e-78	1.1482	0.250887	0.600521	NO
TCGA-61-2110-01A-01R-1568-13	OV	MIR660	hsa-mir-660	chrX	+	5p	50013240	NA	flanking-5	NA	NA	-16	A	C	21.1676	10.6925	1.97968	0.985264	1.8154e-57	1.23629e-54	0.829828	0.406636	0.390794	NO
TCGA-EB-A431-01A-11R-A25Z-13	SKCM	MIR1306	hsa-mir-1306	chr22	+	both	20086146	NA	flanking-3	NA	NA	17	C	T	56.9043	28.754	1.979	0.984775	6.84424e-81	4.66093e-78	1.11657	0.264179	0.578102	NO
TCGA-64-1676-01A-01T-0947-13	LUAD	MIR409	hsa-mir-409	chr14	+	both	101065373	COSN24408235	flanking-3	NA	NA	6	G	A	34.4227	17.3987	1.97847	0.984387	7.90072e-48	5.38039e-45	0.718356	0.472538	0.325563	NO
TCGA-A5-A0R7-01A-31R-A103-13	UCEC	MIR381	hsa-mir-381	chr14	+	3p	101045927	COSN2381583	non-seed duplex_5p	1	NA	NA	A	G	64.9771	33.1556	1.95976	0.970676	9.22535e-61	6.28246e-58	0.824552	0.409626	0.387613	NO
TCGA-MA-AA42-01A-12R-A38M-13	CESC	MIR222	hsa-mir-222	chrX	-	3p	45747066	NA	loop	NA	7	NA	G	A	226.131	116.753	1.93683	0.953697	4.05462e-40	2.76119e-37	0.888094	0.37449	0.42656	NO
TCGA-L4-A4E5-01A-11H-A24S-13	LUAD	MIR301A	hsa-mir-301a	chr17	-	3p	59151127	NA	flanking-3	NA	NA	22	G	T	27.1793	14.1381	1.92242	0.94292	4.87148e-72	3.31748e-69	0.941935	0.346226	0.46064	NO
TCGA-22-5478-01A-01T-1634-13	LUSC	MIR136	hsa-mir-136	chr14	+	both	100884795	NA	flanking-3	NA	NA	24	G	A	61.9465	32.254	1.92058	0.941544	1.32104e-65	8.99626e-63	0.938504	0.347985	0.458439	NO
TCGA-D3-A8GN-06A-11R-A37G-13	SKCM	MIR29A	hsa-mir-29a	chr7	-	3p	130876738	NA	flanking-3	NA	NA	10	C	T	22153.1	11600.1	1.90974	0.933375	5.09368e-62	3.4688e-59	0.924265	0.355348	0.449346	NO
TCGA-QF-A5YS-01A-11R-A31S-13	UCEC	MIR20B	hsa-mir-20b	chrX	-	5p	134169794	NA	flanking-3	NA	NA	19	G	T	58.8825	31.2464	1.88446	0.914148	3.72195e-23	2.53465e-20	0.454833	0.64923	0.187602	NO
TCGA-FP-A4BE-01A-12R-A24L-13	STAD	MIR342	hsa-mir-342	chr14	+	3p	100109746	NA	flanking-3	NA	NA	9	C	T	172.89	92.0036	1.87917	0.910094	1.22663e-62	8.35332e-60	0.967632	0.333228	0.477258	NO
TCGA-AJ-A2QO-01A-11R-A18L-13	UCEC	MIR454	hsa-mir-454	chr17	-	3p	59137873	NA	flanking-5	NA	NA	-24	AT	A	23.7348	12.6501	1.87626	0.907857	5.10121e-120	3.47392e-117	1.3516	0.176503	0.753249	NO
TCGA-BT-A20N-01A-11R-A14X-13	BLCA	MIR320A	hsa-mir-320a	chr8	-	3p	22245021	COSN2376802	seed_5p	8	NA	NA	G	A	1268.01	678.371	1.8692	0.902417	3.25915e-72	2.21948e-69	1.10803	0.267848	0.572112	NO
TCGA-EB-A3Y6-01A-21R-A23A-13	SKCM	MIR136	hsa-mir-136	chr14	+	both	100884756	COSM3493816	seed_3p	7	NA	NA	C	A	12.1246	6.54379	1.85285	0.889743	4.41397e-32	3.00591e-29	0.605208	0.545041	0.263571	NO
TCGA-EW-A1PC-01B-11R-A21U-13	BRCA	MIR25	hsa-mir-25	chr7	-	3p	100093640	NA	flanking-5	NA	NA	-10	G	T	18759.8	10143.3	1.84948	0.887123	6.64046e-230	4.52215e-227	1.2875	0.19792	0.70351	NO
TCGA-BT-A42F-01A-11R-A23X-13	BLCA	MIR21	hsa-mir-21	chr17	+	5p	59841300	NA	loop	NA	6	NA	G	C	438328	237157	1.84826	0.886168	1.86897e-95	1.27277e-92	1.38243	0.166839	0.777703	NO
TCGA-C8-A12K-01A-21R-A114-13	BRCA	MIRLET7B	hsa-let-7b	chr22	+	5p	46113723	NA	loop	NA	11	NA	G	A	48162	26117.8	1.84403	0.882859	9.72707e-177	6.62413e-174	1.05618	0.290887	0.536276	NO
TCGA-D3-A3C3-06A-12R-A18V-13	SKCM	MIR144	hsa-mir-144	chr17	-	both	28861615	NA	flanking-5	NA	NA	-11	C	T	44.4809	24.1272	1.8436	0.882528	2.82626e-20	1.92469e-17	0.457166	0.647552	0.188726	NO
TCGA-77-A5G6-01A-11H-A27R-13	LUSC	MIR598	hsa-mir-598	chr8	-	3p	11035292	NA	flanking-5	NA	NA	-13	C	A	35.9226	19.547	1.83775	0.877941	4.05373e-58	2.76059e-55	0.861472	0.388978	0.410075	NO
TCGA-XF-A9SM-01A-11R-A42V-13	BLCA	MIR185	hsa-mir-185	chr22	+	5p	20033213	NA	flanking-3	NA	NA	4	C	T	145.275	79.2943	1.83211	0.873502	1.41914e-65	9.66435e-63	1.03043	0.302806	0.518835	NO
TCGA-EE-A2MK-06A-11R-A18V-13	SKCM	MIR520A	hsa-mir-520a	chr19	+	both	53690903	COSN5028196	non-seed duplex_5p	9	NA	NA	G	A	3.91202	2.13566	1.83176	0.873229	6.18046e-19	4.20889e-16	0.443827	0.657168	0.182324	NO
TCGA-X6-A7WC-01A-12R-A359-13	SARC	MIR653	hsa-mir-653	chr7	-	both	93482809	NA	loop	NA	14	NA	G	A	14.1514	7.77703	1.81965	0.863659	2.1826e-14	1.48635e-11	0.504468	0.613933	0.211879	NO
TCGA-C5-A2LT-01A-11R-A18L-13	CESC	MIR222	hsa-mir-222	chrX	-	3p	45747065	COSN2377957	loop	NA	8	NA	C	T	211.685	116.753	1.8131	0.858459	2.3734e-34	1.61628e-31	0.799407	0.424054	0.372578	NO
TCGA-EE-A20C-06A-11R-A18V-13	SKCM	MIR6892	hsa-mir-6892	chr7	+	5p	143382711	NA	loop	NA	5	NA	C	A	13.0838	7.25218	1.80412	0.851298	1.01538e-44	6.91476e-42	0.743511	0.457172	0.33992	NO
TCGA-B6-A0RT-01A-21R-A085-13	BRCA	MIRLET7C	hsa-let-7c	chr21	+	5p	16539919	NA	flanking-3	NA	NA	15	A	C	4253.95	2379.29	1.78791	0.838275	2.67054e-126	1.81864e-123	0.839021	0.401458	0.39636	NO
TCGA-AP-A0LE-01A-11R-A103-13	UCEC	MIR744	hsa-mir-744	chr17	+	5p	12082007	NA	flanking-3	NA	NA	20	C	T	164.726	92.3111	1.78446	0.835491	1.45593e-86	9.91489e-84	1.05294	0.292369	0.534068	NO
TCGA-EE-A29P-06A-11R-A18W-13	SKCM	MIR34A	hsa-mir-34a	chr1	-	5p	9151778	NA	flanking-5	NA	NA	-22	G	A	435.453	244.302	1.78244	0.833854	4.88931e-37	3.32962e-34	0.65891	0.509953	0.292469	NO
TCGA-CC-A7IF-01A-11R-A33A-13	LIHC	MIR122	hsa-mir-122	chr18	+	5p	58451084	COSN16303070	flanking-5	NA	NA	-4	G	A	29137.4	16359.7	1.78104	0.832723	2.86941e-18	1.95407e-15	0.479297	0.631727	0.19947	NO
TCGA-Q1-A6DW-01A-11R-A32K-13	CESC	MIR301A	hsa-mir-301a	chr17	-	3p	59151171	COSN16132402	non-seed duplex_3p	1	NA	NA	G	A	23.0158	13.0199	1.76774	0.821907	3.26208e-45	2.22148e-42	0.96342	0.335337	0.474519	NO
TCGA-VQ-A91E-01A-31R-A415-13	STAD	MIR519B	hsa-mir-519b	chr19	+	both	53695307	NA	flanking-3	NA	NA	23	T	C	3.08046	1.75024	1.76002	0.815593	9.32499e-30	6.35032e-27	0.598424	0.549557	0.259987	NO
TCGA-VQ-A8PO-01A-11R-A415-13	STAD	MIRLET7D	hsa-let-7d	chr9	+	5p	94178817	NA	flanking-5	NA	NA	-24	GA	G	872.491	495.779	1.75984	0.815443	0.132705	1	1.06661	0.286153	0.543402	NO
TCGA-VQ-AA6D-01A-11R-A415-13	STAD	MIRLET7D	hsa-let-7d	chr9	+	5p	94178817	NA	flanking-5	NA	NA	-24	GA	G	872.491	495.779	1.75984	0.815443	0.132705	1	1.06661	0.286153	0.543402	NO
TCGA-G4-6588-01A-11H-1773-13	COAD	MIR431	hsa-mir-431	chr14	+	3p	100881065	COSM469661	loop	NA	19	NA	G	A	28.8762	16.5492	1.74487	0.803119	3.33128e-68	2.2686e-65	1.01475	0.310226	0.508321	NO
TCGA-A6-6653-01A-11H-1773-13	COAD	MIR10B	hsa-mir-10b	chr2	+	5p	176150322	NA	flanking-5	NA	NA	-7	CTA	C	61839	35463.9	1.74372	0.802167	5.0511e-83	3.4398e-80	1.17172	0.241311	0.617422	NO
TCGA-PK-A5HB-01A-11R-A29W-13	ACC	MIR29C	hsa-mir-29c	chr1	-	3p	207801845	NA	flanking-3	NA	NA	20	C	T	2001.33	1149.74	1.74068	0.79965	1.35292e-07	9.21337e-05	0.657476	0.510875	0.291685	NO
TCGA-51-4080-01A-01T-1557-13	LUSC	MIR10A	hsa-mir-10a	chr17	-	5p	48579940	NA	flanking-5	NA	NA	-14	G	C	36790.1	21363.8	1.72208	0.78415	2.49578e-93	1.69962e-90	1.21094	0.225918	0.646049	NO
TCGA-HF-7136-01A-11R-2055-13	STAD	MIR217	hsa-mir-217	chr2	-	5p	55982979	NA	flanking-3	NA	NA	5	C	A	55.5141	32.2749	1.72004	0.78244	6.76449e-30	4.60662e-27	0.597668	0.550061	0.259589	NO
TCGA-D5-6928-01A-11H-1927-13	COAD	MIR146A	hsa-mir-146a	chr5	+	5p	160485354	NA	flanking-5	NA	NA	-18	G	A	352.77	205.204	1.71912	0.781672	4.52446e-42	3.08116e-39	0.730102	0.465328	0.332241	NO
TCGA-DD-AACM-01A-11R-A41H-13	LIHC	MIR191	hsa-mir-191	chr3	-	5p	49020611	NA	flanking-3	NA	NA	20	G	T	918.726	535.696	1.71502	0.778221	3.2163e-74	2.1903e-71	1.21037	0.226136	0.64563	NO
TCGA-R6-A6XG-01B-11R-A337-13	ESCA	MIR483	hsa-mir-483	chr11	-	both	2134167	NA	loop	NA	14	NA	G	T	4.145	2.42313	1.7106	0.774502	9.6205e-15	6.55156e-12	0.626025	0.531298	0.274661	NO
TCGA-A6-6141-01A-11H-1773-13	COAD	MIR136	hsa-mir-136	chr14	+	both	100884768	COSM1368270	non-seed duplex_3p	19	NA	NA	G	A	44.8186	26.2607	1.70668	0.771189	7.87758e-84	5.36463e-81	1.17838	0.238645	0.622248	NO
TCGA-EE-A3AA-06A-11R-A18V-13	SKCM	MIR6892	hsa-mir-6892	chr7	+	5p	143382671	NA	flanking-5	NA	NA	-15	C	T	12.3044	7.25218	1.69664	0.762684	1.3173e-37	8.97081e-35	0.666116	0.505337	0.296419	NO
TCGA-BR-8078-01A-11R-2343-13	STAD	MIR511	hsa-mir-511	chr10	+	3p	17845149	NA	loop	NA	7	NA	AT	A	14.3343	8.46847	1.69267	0.759298	1.24268e-47	8.46268e-45	0.805544	0.420506	0.376228	NO
TCGA-ER-A19S-06A-11R-A18X-13	SKCM	MIR500A	hsa-mir-500a	chrX	+	3p	50008447	COSN1085194	seed_5p	5	NA	NA	C	T	2542.93	1503.62	1.6912	0.758051	2.55746e-48	1.74163e-45	0.781762	0.434354	0.362156	NO
TCGA-ET-A25J-01A-11R-A16Q-13	THCA	MIR152	hsa-mir-152	chr17	-	3p	48037240	NA	flanking-5	NA	NA	-8	G	A	863.766	513.676	1.68154	0.749783	4.60015e-73	3.1327e-70	0.949958	0.342134	0.465804	NO
TCGA-05-4415-01A-22H-1857-13	LUAD	MIR664A	hsa-mir-664a	chr1	-	both	220200531	NA	flanking-3	NA	NA	18	T	C	49.6112	29.9059	1.65891	0.730238	4.29727e-94	2.92644e-91	1.14051	0.254072	0.595043	NO
TCGA-D1-A174-01A-11R-A12H-13	UCEC	MIRLET7I	hsa-let-7i	chr12	+	5p	62603773	NA	flanking-3	NA	NA	5	C	T	1581.44	955.016	1.65593	0.727641	7.13286e-103	4.85748e-100	1.19612	0.231649	0.63517	NO
TCGA-EE-A3JD-06A-11R-A20E-13	SKCM	MIR517B	hsa-mir-517b	chr19	+	3p	53721115	NA	loop	NA	13	NA	A	G	3.41098	2.07267	1.64569	0.718697	1.16682e-14	7.94606e-12	0.377892	0.705511	0.151496	NO
TCGA-21-1079-01A-01T-1557-13	LUSC	MIR320A	hsa-mir-320a	chr8	-	3p	22245034	NA	flanking-5	NA	NA	-6	G	A	878.375	533.992	1.64492	0.71802	3.94437e-78	2.68611e-75	1.06113	0.288631	0.539657	NO
TCGA-BP-4987-01A-01R-1762-13	KIRC	MIR99B	hsa-mir-99b	chr19	+	5p	51692651	COSN2375503	loop	NA	12	NA	G	A	48078.4	29278.5	1.6421	0.715546	1.65266e-119	1.12546e-116	1.3993	0.161722	0.79123	NO
TCGA-13-0894-01B-01R-1565-13	OV	MIR6842	hsa-mir-6842	chr8	+	3p	27433455	NA	flanking-3	NA	NA	21	A	C	19.3622	11.9206	1.62427	0.699789	1.0471e-56	7.13078e-54	0.822531	0.410775	0.386396	NO
TCGA-Y8-A896-01A-11R-A36A-13	KIRP	MIR106A	hsa-mir-106a	chrX	-	5p	134170284	NA	flanking-5	NA	NA	-18	T	A	17.4287	10.8081	1.61256	0.689349	1.43777e-27	9.7912e-25	0.741231	0.458553	0.33861	NO
TCGA-N5-A59E-01A-11R-A28Z-13	UCS	MIR126	hsa-mir-126	chr9	+	both	136670683	NA	flanking-3	NA	NA	9	G	C	3365.05	2119.08	1.58798	0.667194	7.55225e-09	5.14308e-06	0.922025	0.356515	0.447922	NO
TCGA-FR-A7U9-06A-11R-A358-13	SKCM	MIR523	hsa-mir-523	chr19	+	5p	53698472	NA	flanking-3	NA	NA	13	A	G	11.533	7.2736	1.5856	0.665026	9.00752e-07	0.000613412	0.235651	0.813704	0.0895337	NO
TCGA-25-2397-01A-01R-1569-13	OV	MIR519C	hsa-mir-519c	chr19	+	both	53686466	NA	flanking-5	NA	NA	-18	A	C	14.1477	8.98529	1.57454	0.654933	8.31971e-12	5.66573e-09	0.317045	0.751209	0.124239	NO
TCGA-D9-A4Z3-01A-11R-A25Z-13	SKCM	MIR33A	hsa-mir-33a	chr22	+	5p	41901021	NA	flanking-3	NA	NA	11	C	T	13.783	8.78743	1.56849	0.649373	1.30947e-29	8.91752e-27	0.574005	0.565964	0.247211	NO
TCGA-K4-A5RJ-01A-11R-A28I-13	BLCA	MIRLET7I	hsa-let-7i	chr12	+	5p	62603732	NA	loop	NA	20	NA	CCG	C	1583.85	1013.46	1.56281	0.64414	1.69183e-81	1.15214e-78	1.21276	0.225222	0.647389	NO
TCGA-BS-A0TJ-01A-11R-A103-13	UCEC	MIR134	hsa-mir-134	chr14	+	5p	101054749	COSN2381582	non-seed duplex_3p	18	NA	NA	C	A	279.424	179.926	1.55299	0.635046	6.3419e-28	4.31883e-25	0.508699	0.610963	0.213985	NO
TCGA-C8-A26Y-01A-11R-A16E-13	BRCA	MIR222	hsa-mir-222	chrX	-	3p	45747060	COSN23017634	loop	NA	13	NA	G	A	63.1605	40.8972	1.54437	0.62702	2.81981e-74	1.92029e-71	0.602858	0.546603	0.262328	NO
TCGA-D6-A6EO-01A-11R-A31R-13	HNSC	MIR30E	hsa-mir-30e	chr1	+	5p	40754408	NA	loop	NA	16	NA	A	T	15605.1	10137.3	1.53937	0.622342	7.15431e-100	4.87208e-97	1.17607	0.239568	0.620571	NO
TCGA-S9-A6TU-01A-12R-A360-13	LGG	MIR27A	hsa-mir-27a	chr19	-	3p	13836513	NA	flanking-5	NA	NA	-5	C	T	753.172	490.525	1.53544	0.618654	8.84837e-69	6.02574e-66	0.890353	0.373276	0.42797	NO
TCGA-BR-6566-01A-11R-1802-13	STAD	MIRLET7E	hsa-let-7e	chr19	+	5p	51692782	NA	flanking-5	NA	NA	-11	GC	G	1462.32	959.171	1.52457	0.608398	1.90759e-48	1.29907e-45	0.813387	0.415996	0.380911	NO
TCGA-XE-AANJ-01A-11R-A43A-13	TGCT	MIR495	hsa-mir-495	chr14	+	3p	101033752	NA	flanking-5	NA	NA	-16	C	T	232.848	152.755	1.52433	0.608172	1.35141e-07	9.20313e-05	0.445633	0.655862	0.183187	NO
TCGA-D8-A1XQ-01A-11R-A14L-13	BRCA	MIR23A	hsa-mir-23a	chr19	-	3p	13836590	COSN23015344	flanking-3	NA	NA	5	C	T	4790.72	3165.55	1.51339	0.597788	2.00584e-148	1.36598e-145	0.934638	0.349975	0.455963	NO
TCGA-DA-A1HV-06A-21R-A18V-13	SKCM	MIR653	hsa-mir-653	chr7	-	both	93482765	NA	flanking-3	NA	NA	19	C	T	15.8	10.4791	1.50776	0.592408	7.48632e-16	5.09818e-13	0.395895	0.692182	0.15978	NO
TCGA-55-8089-01A-11H-2240-13	LUAD	MIR320A	hsa-mir-320a	chr8	-	3p	22244987	COSN24411655	non-seed duplex_3p	10	NA	NA	C	A	697.624	463.419	1.50539	0.590134	3.69578e-69	2.51683e-66	0.914586	0.360409	0.443204	NO
TCGA-EE-A2GL-06A-11R-A18V-13	SKCM	MIR136	hsa-mir-136	chr14	+	both	100884791	NA	flanking-3	NA	NA	20	C	T	9.78746	6.54327	1.49581	0.580923	8.98704e-16	6.12018e-13	0.395191	0.692702	0.159454	NO
TCGA-FD-A3B7-01A-31R-A20E-13	BLCA	MIR34A	hsa-mir-34a	chr1	-	5p	9151733	COSN513667	loop	NA	2	NA	C	T	239.246	160.3	1.49248	0.577716	2.86528e-32	1.95125e-29	0.642816	0.520343	0.28371	NO
TCGA-BL-A3JM-01A-12R-A21E-13	BLCA	MIR20A	hsa-mir-20a	chr13	+	5p	91351118	COSN513764	non-seed duplex_3p	11	NA	NA	G	C	480.392	322.146	1.49123	0.576499	1.21128e-26	8.24884e-24	0.572712	0.56684	0.24654	NO
TCGA-AA-3949-01A-01T-1021-13	COAD	MIR382	hsa-mir-382	chr14	+	5p	101054389	NA	flanking-3	NA	NA	17	C	A	37.5426	25.1952	1.49007	0.575378	1.01931e-57	6.94149e-55	0.901309	0.367424	0.434833	NO
TCGA-44-A4SU-01A-11H-A24S-13	LUAD	MIR106A	hsa-mir-106a	chrX	-	5p	134170272	NA	flanking-5	NA	NA	-6	G	A	17.0612	11.4843	1.48561	0.571057	7.80204e-34	5.31319e-31	0.579732	0.562095	0.25019	NO
TCGA-56-7823-01B-11H-2246-13	LUSC	MIR135B	hsa-mir-135b	chr1	-	5p	205448347	NA	loop	NA	14	NA	G	GT	44.9336	30.3796	1.47907	0.564693	2.53402e-16	1.72567e-13	0.394365	0.693311	0.159072	NO
TCGA-AJ-A23N-01A-11R-A22I-13	UCEC	MIR340	hsa-mir-340	chr5	-	5p	180015400	NA	flanking-5	NA	NA	-18	G	A	41.7037	28.2869	1.47431	0.560042	1.5907e-56	1.08327e-53	0.785428	0.432202	0.364313	NO
TCGA-V5-A7RB-01A-11R-A353-13	ESCA	MIR660	hsa-mir-660	chrX	+	5p	50013286	NA	loop	NA	9	NA	C	G	83.0462	56.5513	1.46851	0.554354	8.87786e-18	6.04582e-15	0.708404	0.478694	0.319942	NO
TCGA-AX-A3G9-01A-11R-A22I-13	UCEC	MIR379	hsa-mir-379	chr14	+	5p	101022086	COSN18715117	non-seed duplex_5p	16	NA	NA	C	T	494.739	339.447	1.45748	0.54348	6.6587e-23	4.53458e-20	0.451901	0.65134	0.186192	NO
TCGA-52-7622-01A-11H-2124-13	LUSC	MIR501	hsa-mir-501	chrX	+	3p	50009808	NA	flanking-3	NA	NA	15	C	A	84.5933	58.0479	1.4573	0.543299	4.80013e-44	3.26889e-41	0.718666	0.472347	0.325739	NO
TCGA-G2-AA3B-01A-11R-A39B-13	BLCA	MIR517B	hsa-mir-517b	chr19	+	3p	53721148	NA	flanking-3	NA	NA	9	G	A	2.97993	2.05977	1.44673	0.532796	8.50415e-10	5.79133e-07	0.312303	0.75481	0.122162	NO
TCGA-CD-5801-01A-11R-1602-13	STAD	MIR369	hsa-mir-369	chr14	+	3p	101065610	COSN19673117	seed_5p	5	NA	NA	C	T	15.2298	10.543	1.44454	0.530614	4.49152e-32	3.05872e-29	0.625039	0.531945	0.274133	NO
TCGA-CH-5772-01A-11R-1579-13	PRAD	MIR758	hsa-mir-758	chr14	+	both	101026099	NA	flanking-3	NA	NA	7	A	T	11.8431	8.25122	1.43531	0.521365	4.39605e-73	2.99371e-70	0.975147	0.329487	0.482161	NO
TCGA-CD-A4MG-01A-11R-A252-13	STAD	MIR505	hsa-mir-505	chrX	-	3p	139924147	NA	flanking-3	NA	NA	13	C	T	53.1898	37.1833	1.43047	0.516494	9.89226e-30	6.73663e-27	0.595638	0.551417	0.25852	NO
TCGA-13-1481-01A-01R-1565-13	OV	MIR504	hsa-mir-504	chrX	-	5p	138667793	NA	flanking-5	NA	NA	-12	C	A	13.1882	9.2404	1.42723	0.513218	1.54776e-13	1.05402e-10	0.343971	0.730868	0.136161	NO
TCGA-K4-A54R-01A-11R-A26X-13	BLCA	MIR330	hsa-mir-330	chr19	-	3p	45638999	NA	flanking-3	NA	NA	10	G	A	78.9432	55.4027	1.4249	0.510861	9.83896e-27	6.70033e-24	0.574721	0.56548	0.247583	NO
TCGA-18-3411-01A-01T-0981-13	LUSC	MIR519B	hsa-mir-519b	chr19	+	both	53695250	COSN2378637	loop	NA	4	NA	T	C	4.98394	3.50605	1.42153	0.50744	1.00147e-09	6.82004e-07	0.289586	0.772133	0.112308	NO
TCGA-CV-6942-01A-21R-2015-13	HNSC	MIR21	hsa-mir-21	chr17	+	5p	59841249	NA	flanking-5	NA	NA	-24	C	G	432632	307749	1.40579	0.491385	2.01963e-92	1.37537e-89	1.10938	0.267265	0.573058	NO
TCGA-AG-A02N-01A-11R-A082-13	READ	MIR93	hsa-mir-93	chr7	-	5p	100093770	NA	flanking-3	NA	NA	7	G	A	9688.52	6893.51	1.40546	0.491037	1.10264e-18	7.509e-16	0.816943	0.413961	0.383041	NO
TCGA-18-3411-01A-01T-0981-13	LUSC	MIR518E	hsa-mir-518e	chr19	+	5p	53729929	NA	flanking-3	NA	NA	18	G	T	4.98394	3.5566	1.40132	0.486789	5.34187e-09	3.63781e-06	0.27646	0.782195	0.106685	NO
TCGA-FD-A3SM-01A-11R-A22V-13	BLCA	MIR127	hsa-mir-127	chr14	+	3p	100883075	NA	flanking-3	NA	NA	19	C	G	1206.56	861.576	1.40041	0.485852	6.28853e-20	4.28249e-17	0.479628	0.631492	0.199632	NO
TCGA-D7-A4YV-01A-11R-A252-13	STAD	MIR454	hsa-mir-454	chr17	-	3p	59137873	NA	flanking-5	NA	NA	-24	AT	A	12.5874	8.98842	1.4004	0.48584	5.33212e-36	3.63118e-33	0.675598	0.499296	0.301642	NO
TCGA-23-2081-01A-01R-1568-13	OV	MIR139	hsa-mir-139	chr11	-	5p	72615081	COSN18246415	seed_3p	8	NA	NA	C	T	124.918	89.83	1.39061	0.475718	1.6971e-24	1.15573e-21	0.488602	0.625124	0.204034	NO
TCGA-A6-A566-01A-11H-A28I-13	COAD	MIR374B	hsa-mir-374b	chrX	-	5p	74218546	NA	flanking-3	NA	NA	11	T	C	79.3211	57.2135	1.38641	0.471349	6.80176e-44	4.632e-41	0.750307	0.45307	0.343835	NO
TCGA-93-8067-01A-11H-2286-13	LUAD	MIR182	hsa-mir-182	chr7	-	5p	129770392	NA	flanking-3	NA	NA	14	G	A	27248.9	19736.4	1.38064	0.465337	1.034e-30	7.04153e-28	0.546204	0.584925	0.232899	NO
TCGA-55-8205-01A-11H-2240-13	LUAD	MIR143	hsa-mir-143	chr5	+	3p	149428971	NA	loop	NA	6	NA	G	T	128783	93311.6	1.38014	0.46481	2.67168e-44	1.81941e-41	0.683627	0.494211	0.306088	NO
TCGA-CM-6674-01A-11H-1838-13	COAD	MIR431	hsa-mir-431	chr14	+	3p	100881038	COSM1368245	non-seed duplex_5p	13	NA	NA	C	T	22.6717	16.5517	1.36975	0.453911	1.8988e-28	1.29308e-25	0.573519	0.566293	0.246959	NO
TCGA-CM-6162-01A-11H-1652-13	COAD	MIRLET7D	hsa-let-7d	chr9	+	5p	94178817	NA	flanking-5	NA	NA	-24	GA	G	1195.97	873.677	1.36889	0.453011	0.246807	1	0.821344	0.411475	0.385657	NO
TCGA-AD-A5EJ-01A-11H-A28I-13	COAD	MIRLET7D	hsa-let-7d	chr9	+	5p	94178817	NA	flanking-5	NA	NA	-24	GA	G	1195.97	873.677	1.36889	0.453011	0.246807	1	0.821344	0.411475	0.385657	NO
TCGA-AX-A1C5-01A-11R-A136-13	UCEC	MIR191	hsa-mir-191	chr3	-	5p	49020612	NA	flanking-3	NA	NA	19	C	T	1473.23	1076.24	1.36888	0.452991	1.85614e-34	1.26403e-31	0.576432	0.564323	0.248472	NO
TCGA-CS-5390-01A-02R-1469-13	LGG	MIR146A	hsa-mir-146a	chr5	+	5p	160485429	COSN8635147	non-seed duplex_3p	22	NA	NA	G	C	48.0137	35.1861	1.36456	0.448438	9.48111e-29	6.45664e-26	0.514836	0.606667	0.217049	NO
TCGA-A5-A0GW-01A-11R-A041-13	UCEC	MIR324	hsa-mir-324	chr17	-	both	7223290	NA	flanking-3	NA	NA	18	C	T	107.629	78.9545	1.36317	0.446968	8.00646e-36	5.4524e-33	0.590828	0.554636	0.255992	NO
TCGA-ET-A3DS-01A-11R-A19N-13	THCA	MIR196B	hsa-mir-196b	chr7	-	5p	27169566	NA	flanking-5	NA	NA	-17	T	A	17.9939	13.3687	1.34597	0.42865	6.90862e-18	4.70477e-15	0.396511	0.691728	0.160065	NO
TCGA-HF-7133-01A-11R-2055-13	STAD	MIR148A	hsa-mir-148a	chr7	-	3p	25949900	NA	flanking-3	NA	NA	22	T	G	39099.6	29210.4	1.33855	0.420674	1.39598e-12	9.50659e-10	0.355179	0.722456	0.141189	NO
TCGA-D1-A16Y-01A-31R-A12H-13	UCEC	MIR100	hsa-mir-100	chr11	-	5p	122152232	NA	flanking-3	NA	NA	8	A	G	3529.69	2638.49	1.33777	0.419828	6.8274e-12	4.64946e-09	0.307374	0.758559	0.120011	NO
TCGA-EO-A22S-01A-11R-A18L-13	UCEC	MIR337	hsa-mir-337	chr14	+	both	100874505	NA	flanking-5	NA	NA	-10	TG	T	27.5566	20.6763	1.33276	0.414422	0.651999	1	0.319398	0.749499	0.125229	NO
TCGA-D1-A17D-01A-12R-A12H-13	UCEC	MIR337	hsa-mir-337	chr14	+	both	100874505	NA	flanking-5	NA	NA	-10	TG	T	27.5566	20.6763	1.33276	0.414422	0.651999	1	0.319398	0.749499	0.125229	NO
TCGA-2H-A9GM-01A-11R-A37J-13	ESCA	MIR452	hsa-mir-452	chrX	-	5p	151959660	NA	loop	1	NA	NA	A	C	112.23	84.2171	1.33263	0.414278	0.000848923	0.578117	0.251513	0.801418	0.096141	NO
TCGA-G2-AA3F-01A-12R-A42V-13	BLCA	MIR511	hsa-mir-511	chr10	+	3p	17845149	NA	loop	NA	7	NA	A	AT	18.9882	14.3486	1.32335	0.404199	6.51596e-12	4.43737e-09	0.351704	0.72506	0.139626	NO
TCGA-FF-A7CW-01A-11R-A38N-13	DLBC	MIR142	hsa-mir-142	chr17	-	both	58331239	NA	flanking-3	NA	NA	6	C	T	27871.2	21199.4	1.31472	0.394751	0.000545569	0.371532	0.604642	0.545417	0.263271	NO
TCGA-HR-A2OG-06A-21R-A18X-13	SKCM	MIR432	hsa-mir-432	chr14	+	5p	100884501	COSM3493811	seed_5p	6	NA	NA	G	A	11.4708	8.74259	1.31207	0.39184	1.94727e-06	0.00132609	0.228365	0.819362	0.086524	NO
TCGA-24-2033-01A-01R-1568-13	OV	MIR424	hsa-mir-424	chrX	-	5p	134546620	NA	flanking-3	NA	NA	24	C	T	37.8043	28.8519	1.31029	0.389886	3.36707e-10	2.29297e-07	0.290642	0.771325	0.112762	NO
TCGA-CM-5341-01A-01T-1409-13	COAD	MIR17	hsa-mir-17	chr13	+	5p	91350688	NA	flanking-3	NA	NA	12	C	G	1545.55	1179.57	1.31026	0.389856	1.66165e-24	1.13159e-21	0.523231	0.600814	0.22126	NO
TCGA-D3-A8GB-06A-11R-A37G-13	SKCM	MIR654	hsa-mir-654	chr14	+	3p	101040262	COSN15625305	loop	NA	7	NA	C	T	24.7585	18.946	1.30679	0.386028	0.749173	1	0.226627	0.820735	0.085797	NO
TCGA-D3-A2JE-06A-11R-A37G-13	SKCM	MIR654	hsa-mir-654	chr14	+	3p	101040262	COSN15625305	loop	NA	7	NA	C	T	24.7585	18.946	1.30679	0.386028	0.749173	1	0.226627	0.820735	0.085797	NO
TCGA-DA-A1IC-06A-11R-A18V-13	SKCM	MIR889	hsa-mir-889	chr14	+	3p	101047887	NA	flanking-5	NA	NA	-24	G	A	9.79127	7.49854	1.30576	0.384886	1.61398e-07	0.000109912	0.251806	0.801191	0.0962637	NO
TCGA-49-AARE-01A-11H-A41D-13	LUAD	MIR501	hsa-mir-501	chrX	+	3p	50009815	NA	flanking-3	NA	NA	22	G	A	64.237	49.3863	1.3007	0.379293	5.91445e-24	4.02774e-21	0.471537	0.637258	0.195685	NO
TCGA-22-4609-01A-21H-2124-13	LUSC	MIR29A	hsa-mir-29a	chr7	-	3p	130876745	NA	flanking-3	NA	NA	3	T	C	7734.59	5947.88	1.30039	0.378949	5.0539e-29	3.44171e-26	0.555805	0.578344	0.237814	NO
TCGA-DX-A8BR-01A-11R-A41D-13	SARC	MIR146A	hsa-mir-146a	chr5	+	5p	160485446	NA	flanking-3	NA	NA	17	A	C	42.5252	32.7627	1.29798	0.376266	0.00100715	0.685871	0.207112	0.835922	0.0778341	NO
TCGA-AB-2807-03A-01T-0734-13	LAML	MIR142	hsa-mir-142	chr17	-	both	58331264	COSN187665	seed_3p	4	NA	NA	T	C	98511.9	75921.8	1.29754	0.375784	2.2825e-12	1.55438e-09	0.546451	0.584756	0.233025	NO
TCGA-AB-2808-03A-01T-0734-13	LAML	MIR374B	hsa-mir-374b	chrX	-	5p	74218618	NA	flanking-5	NA	NA	-10	T	A	252.282	194.558	1.29669	0.374835	5.00402e-16	3.40774e-13	0.644572	0.519204	0.284662	NO
TCGA-HP-A5N0-01A-11R-A28Z-13	LIHC	MIR372	hsa-mir-372	chr19	+	3p	53787942	COSN16303213	non-seed duplex_3p	12	NA	NA	A	C	2.29983	1.77639	1.29466	0.372574	8.70241e-06	0.00592634	0.235474	0.813841	0.0894607	NO
TCGA-AP-A5FX-01A-11R-A27R-13	UCEC	MIR324	hsa-mir-324	chr17	-	both	7223295	NA	flanking-3	NA	NA	13	C	T	101.713	78.9545	1.28825	0.365412	1.36622e-25	9.30398e-23	0.483023	0.629079	0.201295	NO
TCGA-ZF-AA56-01A-31R-A39B-13	BLCA	MIR20A	hsa-mir-20a	chr13	+	5p	91351142	NA	flanking-3	NA	NA	13	T	C	413.692	322.14	1.2842	0.360868	3.04622e-12	2.07447e-09	0.358497	0.719971	0.142685	NO
TCGA-MV-A51V-01A-11R-A26X-13	BLCA	MIR30D	hsa-mir-30d	chr8	-	5p	134804855	NA	flanking-3	NA	NA	24	G	C	5811.87	4530.36	1.28287	0.359378	1.27425e-14	8.67764e-12	0.398349	0.690373	0.160916	NO
TCGA-D3-A8GL-06A-11R-A37G-13	SKCM	MIR214	hsa-mir-214	chr1	-	3p	172138795	NA	flanking-3	NA	NA	21	T	G	20.9683	16.3762	1.28042	0.356613	9.0458e-07	0.000616019	0.23507	0.814155	0.089293	NO
TCGA-85-A4CN-01A-11H-A24G-13	LUSC	MIR542	hsa-mir-542	chrX	-	3p	134541430	NA	flanking-5	NA	NA	-8	G	T	247.832	193.621	1.27998	0.356126	6.67701e-21	4.54704e-18	0.456105	0.648314	0.188214	NO
TCGA-BC-A10X-01A-11R-A130-13	LIHC	MIR23B	hsa-mir-23b	chr9	+	3p	95085214	NA	flanking-5	NA	NA	-13	T	TGC	2337.48	1827.21	1.27926	0.355308	3.12842e-20	2.13045e-17	0.509111	0.610674	0.21419	NO
TCGA-55-1595-01A-01T-0947-13	LUAD	MIR518E	hsa-mir-518e	chr19	+	5p	53729836	NA	flanking-5	NA	NA	-17	G	A	3.29221	2.57647	1.2778	0.353663	1.60823e-07	0.00010952	0.235777	0.813606	0.0895859	NO
TCGA-85-7697-01A-11H-2124-13	LUSC	MIR551B	hsa-mir-551b	chr3	+	3p	168551904	NA	loop	NA	8	NA	G	A	11.8775	9.29998	1.27716	0.352936	8.73915e-06	0.00595136	0.208979	0.834465	0.0785921	NO
TCGA-GK-A6C7-01A-11R-A33A-13	KIRC	MIR224	hsa-mir-224	chrX	-	5p	151958656	NA	flanking-5	NA	NA	-4	C	A	33.1009	25.9553	1.2753	0.350838	8.99011e-12	6.12226e-09	0.312825	0.754414	0.12239	NO
TCGA-G4-6588-01A-11H-1773-13	COAD	MIR17	hsa-mir-17	chr13	+	5p	91350602	NA	flanking-5	NA	NA	-16	CCA	C	1503.63	1179.57	1.27473	0.35019	1.7078e-20	1.16301e-17	0.469994	0.638359	0.194935	NO
TCGA-AA-3864-01A-01T-1021-13	COAD	MIR223	hsa-mir-223	chrX	+	3p	66018886	NA	flanking-5	NA	NA	-9	G	A	577.739	453.478	1.27402	0.349385	4.47071e-10	3.04455e-07	0.306773	0.759017	0.119749	NO
TCGA-2G-AAGZ-01A-11R-A439-13	TGCT	MIR223	hsa-mir-223	chrX	+	3p	66018968	NA	flanking-3	NA	NA	10	C	G	345.922	272.922	1.26748	0.341958	1.01556e-05	0.00691597	0.367938	0.712919	0.14696	NO
TCGA-46-3767-01A-01T-0981-13	LUSC	MIR493	hsa-mir-493	chr14	+	both	100869102	COSN2378441	loop	NA	6	NA	G	T	18.3933	14.5268	1.26616	0.340461	1.04298e-09	7.10272e-07	0.289266	0.772378	0.11217	NO
TCGA-BF-AAP4-01A-11R-A404-13	SKCM	MIR653	hsa-mir-653	chr7	-	both	93482816	NA	loop	NA	7	NA	G	A	13.2547	10.4791	1.26487	0.338986	2.27869e-06	0.00155179	0.226538	0.820783	0.0857718	NO
TCGA-BS-A0U8-01A-11R-A103-13	UCEC	MIR328	hsa-mir-328	chr16	-	3p	67202382	COSN23014987	seed_5p	8	NA	NA	G	GC	88.908	70.3303	1.26415	0.338168	1.29527e-21	8.8208e-19	0.436746	0.662296	0.178948	NO
TCGA-E9-A1RF-01A-11R-A156-13	BRCA	MIR301A	hsa-mir-301a	chr17	-	3p	59151212	COSN23015194	flanking-5	NA	NA	-4	C	T	13.2044	10.4572	1.26271	0.336524	2.19245e-19	1.49306e-16	0.280196	0.779327	0.10828	NO
TCGA-A6-6653-01A-11H-1773-13	COAD	MIR340	hsa-mir-340	chr5	-	5p	180015338	COSN20188985	seed_3p	3	NA	NA	G	A	21.9477	17.4279	1.25934	0.332673	1.07027e-25	7.28855e-23	0.538445	0.59027	0.22895	NO
TCGA-O2-A52N-01A-11H-A26V-13	LUSC	MIR493	hsa-mir-493	chr14	+	both	100869113	NA	loop	NA	17	NA	C	A	18.2923	14.5268	1.25921	0.332516	2.43635e-09	1.65915e-06	0.282515	0.777549	0.109272	NO
TCGA-EY-A1GO-01A-11R-A14C-13	UCEC	MIR2355	hsa-mir-2355	chr2	-	both	207110087	NA	flanking-5	NA	NA	-24	C	G	59.1276	46.9881	1.25835	0.331537	2.1177e-18	1.44215e-15	0.397322	0.69113	0.16044	NO
TCGA-AJ-A8CV-01A-11R-A37P-13	UCEC	MIR197	hsa-mir-197	chr1	+	3p	109598937	NA	loop	NA	14	NA	C	T	698.184	555.231	1.25747	0.330519	4.33308e-21	2.95083e-18	0.43048	0.666847	0.175974	NO
TCGA-GK-A6C7-01A-11R-A33A-13	KIRC	MIR500A	hsa-mir-500a	chrX	+	3p	50008524	NA	flanking-3	NA	NA	21	G	T	264.02	209.988	1.25731	0.330338	6.15584e-23	4.19212e-20	0.464132	0.642553	0.192091	NO
TCGA-22-5479-01A-31H-1948-13	LUSC	MIR518F	hsa-mir-518f	chr19	+	both	53700097	NA	flanking-3	NA	NA	10	T	C	1.78232	1.41872	1.25629	0.329166	3.38781e-10	2.3071e-07	0.297355	0.766195	0.11566	NO
TCGA-G2-A2ES-01A-11R-A17X-13	BLCA	MIR532	hsa-mir-532	chrX	+	5p	50003192	COSN514219	loop	NA	4	NA	C	T	932.944	747.081	1.24879	0.320526	3.07819e-13	2.09625e-10	0.374785	0.707821	0.150077	NO
TCGA-B6-A0RE-01A-11R-A057-13	BRCA	MIR409	hsa-mir-409	chr14	+	both	101065337	COSN23014474	loop	NA	1	NA	C	G	36.4034	29.4027	1.2381	0.308125	5.78062e-26	3.9366e-23	0.330457	0.741055	0.13015	NO
TCGA-QR-A6H5-01A-11R-A35M-13	PCPG	MIR433	hsa-mir-433	chr14	+	3p	100881893	NA	flanking-5	NA	NA	-4	G	A	227.715	184.624	1.2334	0.302643	0.0970084	1	0.123654	0.901589	0.0449913	NO
TCGA-CV-7427-01A-11R-2080-13	HNSC	MIR148B	hsa-mir-148b	chr12	+	3p	54337215	NA	flanking-5	NA	NA	-25	C	T	310.764	252.817	1.22921	0.297729	3.6371e-44	2.47687e-41	0.674391	0.500063	0.300976	NO
TCGA-A4-7828-01A-11R-2138-13	KIRP	MIR19A	hsa-mir-19a	chr13	+	3p	91350980	NA	flanking-3	NA	NA	19	T	G	16.3974	13.3409	1.2291	0.297605	3.65734e-13	2.49065e-10	0.464443	0.642331	0.192241	NO
TCGA-ER-A19H-06A-12R-A18V-13	SKCM	MIR193B	hsa-mir-193b	chr16	+	3p	14303982	COSN5027646	seed_5p	3	NA	NA	G	A	106.718	86.8815	1.22831	0.296676	1.07093e-06	0.000729306	0.233438	0.815422	0.0886178	NO
TCGA-B6-A0RO-01A-22R-A085-13	BRCA	MIR410	hsa-mir-410	chr14	+	3p	101065928	COSN23014476	seed_5p	4	NA	NA	T	A	11.3598	9.26667	1.22587	0.293812	2.74513e-20	1.86944e-17	0.287626	0.773633	0.111465	NO
TCGA-97-7937-01A-11H-2169-13	LUAD	MIR10397	hsa-mir-10397	chr5	+	both	10402389	NA	loop	NA	4	NA	G	T	12.033	9.86765	1.21944	0.286221	2.99421e-15	2.03906e-12	0.360953	0.718134	0.143794	NO
TCGA-AG-3999-01A-01T-1120-13	READ	MIR432	hsa-mir-432	chr14	+	5p	100884582	NA	flanking-3	NA	NA	18	C	T	16.8747	13.8715	1.21649	0.28273	2.17693e-05	0.0148249	0.354308	0.723108	0.140797	NO
TCGA-VS-A959-01A-11R-A42V-13	CESC	MIR21	hsa-mir-21	chr17	+	5p	59841322	COSN8603510	non-seed duplex_3p	12	NA	NA	G	A	384932	316847	1.21488	0.280815	4.18533e-24	2.85021e-21	0.635468	0.525123	0.279739	NO
TCGA-AO-A03T-01A-21R-A035-13	BRCA	MIR532	hsa-mir-532	chrX	+	5p	50003161	COSN23017652	flanking-5	NA	NA	-6	C	G	794.195	655.332	1.2119	0.277267	5.71531e-29	3.89213e-26	0.351427	0.725268	0.139502	NO
TCGA-78-7535-01A-11H-2065-13	LUAD	MIR379	hsa-mir-379	chr14	+	5p	101022087	COSN24410139	non-seed duplex_5p	17	NA	NA	G	T	497.607	411.664	1.20877	0.273539	0.7689	1	0.208075	0.835229	0.0781944	NO
TCGA-95-7039-01A-11H-1948-13	LUAD	MIR379	hsa-mir-379	chr14	+	5p	101022087	COSN24410139	non-seed duplex_5p	17	NA	NA	G	T	497.607	411.664	1.20877	0.273539	0.7689	1	0.208075	0.835229	0.0781944	NO
TCGA-AX-A05S-01A-11R-A00W-13	UCEC	MIR15A	hsa-mir-15a	chr13	-	5p	50049206	NA	flanking-5	NA	NA	-18	AT	A	169.868	140.973	1.20497	0.268995	8.05496e-18	5.48543e-15	0.390314	0.696304	0.157201	NO
TCGA-EJ-7781-01A-11R-2117-13	PRAD	MIR100	hsa-mir-100	chr11	-	5p	122152219	NA	flanking-3	NA	NA	21	C	T	12298.8	10247.3	1.20021	0.263284	2.44498e-27	1.66503e-24	0.521073	0.602316	0.220175	NO
TCGA-N5-A4RA-01A-11R-A28Z-13	UCS	MIR452	hsa-mir-452	chrX	-	5p	151959619	NA	flanking-3	NA	NA	15	A	G	51.0751	42.6365	1.19792	0.260532	0.185567	1	0.180807	0.856519	0.0672629	NO
TCGA-VQ-A94O-01A-11R-A415-13	STAD	MIR155	hsa-mir-155	chr21	+	5p	25574065	NA	flanking-3	NA	NA	22	C	A	518.52	434.057	1.19459	0.256515	4.23668e-06	0.00288518	0.226601	0.820734	0.0857974	NO
TCGA-G3-A5SK-01A-11R-A27R-13	LIHC	MIR374B	hsa-mir-374b	chrX	-	5p	74218572	COSN16303142	seed_3p	7	NA	NA	T	G	94.6002	79.2268	1.19404	0.255854	7.58289e-14	5.16395e-11	0.404812	0.685615	0.163919	NO
TCGA-L5-A88S-01A-11R-A36E-13	ESCA	MIR409	hsa-mir-409	chr14	+	both	101065342	NA	loop	NA	6	NA	C	T	22.9327	19.2812	1.18938	0.250211	0.000419578	0.285733	0.267172	0.789337	0.102738	NO
TCGA-E5-A2PC-01A-11R-A205-13	BLCA	MIR18A	hsa-mir-18a	chr13	+	5p	91350745	NA	flanking-5	NA	NA	-11	G	T	24.012	20.2201	1.18753	0.247967	2.66014e-05	0.0181155	0.211438	0.832545	0.0795921	NO
TCGA-E6-A1M0-01A-11R-A143-13	UCEC	MIR500A	hsa-mir-500a	chrX	+	3p	50008523	NA	flanking-3	NA	NA	20	C	T	583.203	493.774	1.18111	0.240148	1.98028e-10	1.34857e-07	0.284418	0.77609	0.110088	NO
TCGA-A5-A2K3-01A-11R-A17X-13	UCEC	MIR874	hsa-mir-874	chr5	-	3p	137647608	NA	loop	NA	10	NA	C	T	43.907	37.7012	1.16461	0.219842	1.80398e-05	0.0122851	0.18925	0.849897	0.0706339	NO
TCGA-22-1012-01A-01T-1557-13	LUSC	MIR23A	hsa-mir-23a	chr19	-	3p	13836586	NA	flanking-3	NA	NA	9	G	C	5739.1	4950.11	1.15939	0.213365	2.12284e-18	1.44565e-15	0.42288	0.672383	0.172383	NO
TCGA-A5-A0VP-01A-21R-A103-13	UCEC	MIR671	hsa-mir-671	chr7	+	5p	151238515	NA	flanking-3	NA	NA	7	G	A	16.0084	13.8799	1.15335	0.20583	3.3545e-11	2.28442e-08	0.297164	0.766341	0.115578	NO
TCGA-05-4244-01A-01T-1108-13	LUAD	MIR106A	hsa-mir-106a	chrX	-	5p	134170287	NA	flanking-5	NA	NA	-21	T	C	13.2246	11.4843	1.15154	0.203559	4.0909e-06	0.0027859	0.206651	0.836282	0.077647	NO
TCGA-EE-A2M5-06A-12R-A18V-13	SKCM	MIR296	hsa-mir-296	chr20	-	both	58817682	COSN5028281	flanking-5	NA	NA	-1	C	T	20.8219	18.251	1.14086	0.190124	0.0120861	1	0.118921	0.905338	0.0431891	NO
TCGA-B5-A11N-01A-11R-A119-13	UCEC	MIR500B	hsa-mir-500b	chrX	+	5p	50010761	NA	flanking-3	NA	NA	20	C	T	13.7388	12.0453	1.1406	0.189792	0.69373	1	0.228384	0.819413	0.0864972	NO
TCGA-QF-A5YS-01A-11R-A31S-13	UCEC	MIR500B	hsa-mir-500b	chrX	+	5p	50010761	NA	flanking-3	NA	NA	20	C	T	13.7388	12.0453	1.1406	0.189792	0.69373	1	0.228384	0.819413	0.0864972	NO
TCGA-D1-A16Y-01A-31R-A12H-13	UCEC	MIR500B	hsa-mir-500b	chrX	+	5p	50010761	NA	flanking-3	NA	NA	20	C	T	13.7388	12.0453	1.1406	0.189792	0.69373	1	0.228384	0.819413	0.0864972	NO
TCGA-4A-A93W-01A-11R-A37G-13	KIRP	MIR874	hsa-mir-874	chr5	-	3p	137647655	NA	flanking-5	NA	NA	-15	A	C	13.4796	11.8276	1.13967	0.188619	0.00425988	1	0.175112	0.860992	0.0650011	NO
TCGA-C4-A0EZ-01A-21R-A24Y-13	BLCA	MIR424	hsa-mir-424	chrX	-	5p	134546697	COSM422225	seed_5p	5	NA	NA	T	A	93.4547	82.2646	1.13603	0.183996	0.000212256	0.144546	0.185742	0.852647	0.0692306	NO
TCGA-2G-AAG3-01A-11R-A439-13	TGCT	MIR200C	hsa-mir-200c	chr12	+	3p	6963698	NA	flanking-5	NA	NA	-5	G	A	2670.03	2356.22	1.13318	0.180381	0.211879	1	0.101023	0.919533	0.0364329	NO
TCGA-D7-6815-01A-11R-1884-13	STAD	MIR522	hsa-mir-522	chr19	+	3p	53751289	COSN24410699	flanking-3	NA	NA	4	G	A	2.00116	1.78131	1.12342	0.167899	0.0130357	1	0.121377	0.903393	0.0441234	NO
TCGA-E6-A1M0-01A-11R-A143-13	UCEC	MIR374B	hsa-mir-374b	chrX	-	5p	74218626	NA	flanking-5	NA	NA	-18	C	A	92.8748	83.0834	1.11785	0.160726	2.017e-08	1.37358e-05	0.249446	0.803016	0.0952757	NO
TCGA-D8-A1XK-01A-21R-A14L-13	BRCA	MIR181C	hsa-mir-181c	chr19	+	5p	13874754	COSN23015345	loop	NA	8	NA	G	A	135.338	121.141	1.11719	0.159874	1.62398e-09	1.10593e-06	0.185749	0.852642	0.0692335	NO
TCGA-67-3771-01A-01T-0947-13	LUAD	MIR30E	hsa-mir-30e	chr1	+	5p	40754357	NA	flanking-5	NA	NA	-14	G	A	14273.2	12857.1	1.11015	0.150749	1.75358e-11	1.19419e-08	0.305004	0.760363	0.118979	NO
TCGA-AA-3509-01A-01T-1409-13	COAD	MIR582	hsa-mir-582	chr5	-	5p	59703625	COSN18166678	flanking-3	NA	NA	5	C	G	265.165	239.09	1.10906	0.149337	9.88681e-05	0.0673292	0.188867	0.850197	0.0704803	NO
TCGA-A6-3809-01A-01T-1021-13	COAD	MIR15A	hsa-mir-15a	chr13	-	5p	50049206	NA	flanking-5	NA	NA	-18	AT	A	132.977	120.173	1.10655	0.146071	5.5855e-06	0.00380373	0.221537	0.824674	0.0837177	NO
TCGA-ZN-A9VQ-01A-11R-A404-13	MESO	MIR1307	hsa-mir-1307	chr10	-	both	103394332	NA	loop	NA	9	NA	A	G	1206.32	1090.36	1.10635	0.145808	0.0366345	1	0.228963	0.818898	0.0867704	NO
TCGA-AA-3710-01A-01T-1021-13	COAD	MIR28	hsa-mir-28	chr3	+	both	188688799	COSN18185224	seed_5p	6	NA	NA	G	T	8015.47	7246.52	1.10611	0.145498	2.39008e-15	1.62764e-12	0.395055	0.692802	0.159391	NO
TCGA-AA-3492-01A-01T-1409-13	COAD	MIR29A	hsa-mir-29a	chr7	-	3p	130876729	NA	flanking-3	NA	NA	19	T	C	8221.94	7452.42	1.10326	0.141771	1.63482e-06	0.00111331	0.233622	0.815279	0.088694	NO
TCGA-66-2789-01A-01T-0981-13	LUSC	MIR126	hsa-mir-126	chr9	+	both	136670610	COSN494120	flanking-5	NA	NA	-6	A	T	3170.19	2873.96	1.10308	0.141532	1.82882e-05	0.0124543	0.200796	0.840858	0.0752773	NO
TCGA-DX-AB32-01A-11R-A41D-13	SARC	MIRLET7G	hsa-let-7g	chr3	-	5p	52268271	NA	flanking-3	NA	NA	9	C	T	668.926	607.376	1.10134	0.139256	0.00244805	1	0.190505	0.848913	0.0711366	NO
TCGA-MV-A51V-01A-11R-A26X-13	BLCA	MIR18A	hsa-mir-18a	chr13	+	5p	91350741	NA	flanking-5	NA	NA	-15	G	C	22.1903	20.2201	1.09744	0.13414	0.0220159	1	0.114379	0.908937	0.0414662	NO
TCGA-L5-A43C-01A-11R-A24L-13	ESCA	MIR361	hsa-mir-361	chrX	-	5p	85903637	NA	flanking-3	NA	NA	4	A	G	516.861	472.222	1.09453	0.130311	0.000720864	0.490909	0.255028	0.798702	0.0976153	NO
TCGA-IA-A83S-01A-11R-A359-13	KIRP	MIR744	hsa-mir-744	chr17	+	5p	12081900	NA	flanking-5	NA	NA	-9	TG	T	58.1072	53.2239	1.09175	0.126643	0.00120013	0.817287	0.19886	0.842372	0.0744958	NO
TCGA-EE-A2GC-06A-11R-A18W-13	SKCM	MIR135B	hsa-mir-135b	chr1	-	5p	205448312	NA	flanking-3	NA	NA	11	C	T	9.30795	8.52711	1.09157	0.126406	0.10386	1	0.0769121	0.938693	0.0274762	NO
TCGA-EB-A4IS-01A-21R-A25Z-13	SKCM	MIR106B	hsa-mir-106b	chr7	-	5p	100093979	NA	flanking-3	NA	NA	23	G	A	1369.28	1258.57	1.08796	0.121628	0.000310445	0.211413	0.171537	0.863801	0.0635862	NO
TCGA-VQ-A91D-01A-11R-A415-13	STAD	MIR379	hsa-mir-379	chr14	+	5p	101022054	NA	flanking-5	NA	NA	-17	C	T	580.911	534.127	1.08759	0.121134	0.00205597	1	0.151153	0.879855	0.0555888	NO
TCGA-UT-A88E-01B-11R-A404-13	MESO	MIR191	hsa-mir-191	chr3	-	5p	49020659	NA	loop	NA	13	NA	G	A	398.305	368.631	1.0805	0.111697	0.0567181	1	0.208309	0.834987	0.0783201	NO
TCGA-D1-A174-01A-11R-A12H-13	UCEC	MIR143	hsa-mir-143	chr5	+	3p	149428924	NA	flanking-5	NA	NA	-20	C	A	79150.6	73344.2	1.07917	0.109919	0.0105992	1	0.112155	0.910701	0.0406244	NO
TCGA-XF-AAN3-01A-11R-A42V-13	BLCA	MIR21	hsa-mir-21	chr17	+	5p	59841300	NA	loop	NA	6	NA	G	A	255576	237157	1.07767	0.107911	0.000797286	0.542952	0.168343	0.866314	0.0623248	NO
TCGA-KN-8434-01A-11R-2314-13	KICH	MIR363	hsa-mir-363	chrX	-	3p	134169420	NA	loop	NA	5	NA	C	A	64.5775	59.9823	1.07661	0.106494	0.548599	1	0.0753891	0.939905	0.026916	NO
TCGA-AB-2805-03A-01T-0734-13	LAML	MIR142	hsa-mir-142	chr17	-	both	58331261	COSN4710472	seed_3p	7	NA	NA	C	G	81244.8	76010.5	1.06886	0.0960758	0.0554473	1	0.140192	0.888508	0.0513384	NO
TCGA-AX-A1CA-01A-12R-A136-13	UCEC	MIR10397	hsa-mir-10397	chr5	+	both	10402401	NA	loop	NA	16	NA	G	T	17.4064	16.3323	1.06576	0.0918862	0.0171271	1	0.104578	0.91671	0.0377678	NO
TCGA-05-4390-01A-02T-1754-13	LUAD	MIR500A	hsa-mir-500a	chrX	+	3p	50008488	COSN24409322	seed_3p	7	NA	NA	C	A	225.221	211.563	1.06456	0.0902521	0.00838394	1	0.117306	0.906617	0.042576	NO
TCGA-66-2727-01A-01T-0981-13	LUSC	MIR361	hsa-mir-361	chrX	-	5p	85903616	NA	flanking-3	NA	NA	25	C	T	535.937	503.687	1.06403	0.0895368	3.82756e-06	0.00260657	0.21688	0.828302	0.0818112	NO
TCGA-GF-A4EO-06A-12R-A24Y-13	SKCM	MIR522	hsa-mir-522	chr19	+	3p	53751274	COSN23023633	non-seed duplex_3p	11	NA	NA	C	T	7.84233	7.37265	1.06371	0.0890987	0.507189	1	0.0315006	0.97487	0.0110532	NO
TCGA-BH-A0E9-01B-11R-A114-13	BRCA	MIR532	hsa-mir-532	chrX	+	5p	50003149	NA	flanking-5	NA	NA	-18	G	T	693.708	655.332	1.05856	0.0821008	0.000681021	0.463775	0.10406	0.917122	0.0375731	NO
TCGA-MT-A67F-01A-11R-A30I-13	HNSC	MIR331	hsa-mir-331	chr12	+	3p	95308469	NA	loop	NA	3	NA	G	A	37.1629	35.1223	1.0581	0.0814758	0.000845496	0.575783	0.147361	0.882847	0.0541144	NO
TCGA-IR-A3LI-01A-11R-A214-13	CESC	MIR425	hsa-mir-425	chr3	-	5p	49020178	COSN16131364	seed_3p	3	NA	NA	G	A	216.805	205.535	1.05483	0.0770101	0.161988	1	0.0804008	0.935918	0.028762	NO
TCGA-ER-A42L-06A-11R-A24Y-13	SKCM	MIR29A	hsa-mir-29a	chr7	-	3p	130876820	NA	flanking-5	NA	NA	-13	G	A	12175	11600.1	1.04957	0.0697934	0.144217	1	0.0691122	0.9449	0.024614	NO
TCGA-H9-7775-01A-11R-2117-13	PRAD	MIR185	hsa-mir-185	chr22	+	5p	20033226	NA	flanking-3	NA	NA	17	C	G	24.3624	23.2164	1.04936	0.0695115	0.00111821	0.761499	0.148104	0.88226	0.0544032	NO
TCGA-CK-6746-01A-11H-1838-13	COAD	MIR503	hsa-mir-503	chrX	-	5p	134546417	NA	flanking-5	NA	NA	-24	G	A	11.6481	11.1418	1.04544	0.0641088	0.16976	1	0.066168	0.947244	0.0235381	NO
TCGA-F4-6570-01A-11H-1773-13	COAD	MIR328	hsa-mir-328	chr16	-	3p	67202382	COSN23012614	seed_5p	8	NA	NA	GC	G	40.1965	38.4975	1.04413	0.0623046	0.0433797	1	0.097363	0.922438	0.0350627	NO
TCGA-GS-A9TT-01A-11R-A38N-13	DLBC	MIR142	hsa-mir-142	chr17	-	both	58331234	NA	flanking-3	NA	NA	11	C	T	22027.7	21199.4	1.03907	0.0552982	0.599914	1	0.0847005	0.9325	0.0303514	NO
TCGA-YC-A89H-01A-11R-A36A-13	BLCA	MIR376C	hsa-mir-376c	chr14	+	3p	101039672	NA	flanking-5	NA	NA	-22	A	G	7.84338	7.57002	1.03611	0.0511787	0.337914	1	0.0476747	0.961976	0.016836	NO
TCGA-VQ-AA64-01A-11R-A415-13	STAD	MIR106B	hsa-mir-106b	chr7	-	5p	100094069	NA	flanking-5	NA	NA	-6	G	A	597.671	576.949	1.03592	0.0509067	0.252171	1	0.0558188	0.955486	0.0197756	NO
TCGA-AA-3815-01A-01T-1021-13	COAD	MIR660	hsa-mir-660	chrX	+	5p	50013252	NA	flanking-5	NA	NA	-4	C	T	46.0464	44.6241	1.03187	0.0452645	0.178882	1	0.0647035	0.94841	0.0230038	NO
TCGA-DM-A0XF-01A-11H-A154-13	COAD	MIR30A	hsa-mir-30a	chr6	-	5p	71403581	NA	loop	NA	14	NA	C	T	7210.27	7004.88	1.02932	0.0416933	0.109671	1	0.0772134	0.938454	0.0275871	NO
TCGA-BR-8360-01A-11R-2343-13	STAD	MIR27A	hsa-mir-27a	chr19	-	3p	13836441	NA	flanking-3	NA	NA	6	TG	T	1644.13	1604.4	1.02477	0.0352936	0.280164	1	0.0525765	0.958069	0.0186031	NO
TCGA-JX-A3Q0-01A-11R-A21U-13	CESC	MIR34A	hsa-mir-34a	chr1	-	5p	9151691	COSN16128430	flanking-3	NA	NA	2	C	G	178.126	174.98	1.01798	0.0257075	0.462416	1	0.0422015	0.966338	0.0148709	NO
TCGA-DF-A2KY-01A-21R-A214-13	UCEC	MIRLET7D	hsa-let-7d	chr9	+	5p	94178817	NA	flanking-5	NA	NA	-24	GA	G	873.11	859.314	1.01606	0.022979	0.902762	1	0.0344998	0.972558	0.0120845	NO
TCGA-B5-A11G-01A-13R-A119-13	UCEC	MIRLET7D	hsa-let-7d	chr9	+	5p	94178817	NA	flanking-5	NA	NA	-24	GA	G	873.11	859.314	1.01606	0.022979	0.902762	1	0.0344998	0.972558	0.0120845	NO
TCGA-B5-A5OC-01A-21R-A27R-13	UCEC	MIRLET7D	hsa-let-7d	chr9	+	5p	94178817	NA	flanking-5	NA	NA	-24	GA	G	873.11	859.314	1.01606	0.022979	0.902762	1	0.0344998	0.972558	0.0120845	NO
TCGA-AX-A063-01A-11R-A00W-13	UCEC	MIRLET7D	hsa-let-7d	chr9	+	5p	94178817	NA	flanking-5	NA	NA	-24	GA	G	873.11	859.314	1.01606	0.022979	0.902762	1	0.0344998	0.972558	0.0120845	NO
TCGA-DI-A0WH-01A-12R-A12H-13	UCEC	MIRLET7D	hsa-let-7d	chr9	+	5p	94178817	NA	flanking-5	NA	NA	-24	GA	G	873.11	859.314	1.01606	0.022979	0.902762	1	0.0344998	0.972558	0.0120845	NO
TCGA-EO-A3AU-01A-21R-A19V-13	UCEC	MIRLET7D	hsa-let-7d	chr9	+	5p	94178817	NA	flanking-5	NA	NA	-24	GA	G	873.11	859.314	1.01606	0.022979	0.902762	1	0.0344998	0.972558	0.0120845	NO
TCGA-AX-A2HG-01A-11R-A17A-13	UCEC	MIRLET7D	hsa-let-7d	chr9	+	5p	94178817	NA	flanking-5	NA	NA	-24	GA	G	873.11	859.314	1.01606	0.022979	0.902762	1	0.0344998	0.972558	0.0120845	NO
TCGA-BS-A0V4-01A-11R-A14C-13	UCEC	MIRLET7D	hsa-let-7d	chr9	+	5p	94178817	NA	flanking-5	NA	NA	-24	GA	G	873.11	859.314	1.01606	0.022979	0.902762	1	0.0344998	0.972558	0.0120845	NO
TCGA-AP-A1DM-01A-21R-A136-13	UCEC	MIRLET7D	hsa-let-7d	chr9	+	5p	94178817	NA	flanking-5	NA	NA	-24	GA	G	873.11	859.314	1.01606	0.022979	0.902762	1	0.0344998	0.972558	0.0120845	NO
TCGA-EY-A2OP-01A-11R-A19V-13	UCEC	MIRLET7D	hsa-let-7d	chr9	+	5p	94178817	NA	flanking-5	NA	NA	-24	GA	G	873.11	859.314	1.01606	0.022979	0.902762	1	0.0344998	0.972558	0.0120845	NO
TCGA-AP-A1DR-01A-11R-A136-13	UCEC	MIRLET7D	hsa-let-7d	chr9	+	5p	94178817	NA	flanking-5	NA	NA	-24	GA	G	873.11	859.314	1.01606	0.022979	0.902762	1	0.0344998	0.972558	0.0120845	NO
TCGA-AX-A2HJ-01A-11R-A17A-13	UCEC	MIRLET7D	hsa-let-7d	chr9	+	5p	94178817	NA	flanking-5	NA	NA	-24	GA	G	873.11	859.314	1.01606	0.022979	0.902762	1	0.0344998	0.972558	0.0120845	NO
TCGA-AX-A3FT-01A-11R-A22I-13	UCEC	MIRLET7D	hsa-let-7d	chr9	+	5p	94178817	NA	flanking-5	NA	NA	-24	GA	G	873.11	859.314	1.01606	0.022979	0.902762	1	0.0344998	0.972558	0.0120845	NO
TCGA-HU-8604-01A-11R-2402-13	STAD	MIR519B	hsa-mir-519b	chr19	+	both	53695204	NA	flanking-5	NA	NA	-21	A	G	1.77468	1.75024	1.01397	0.02001	0.763648	1	0.0146819	0.988286	0.00511738	NO
TCGA-B5-A1MW-01A-11R-A17A-13	UCEC	MIR27A	hsa-mir-27a	chr19	-	3p	13836523	NA	flanking-5	NA	NA	-15	G	A	1628.35	1612.64	1.00974	0.0139833	0.666497	1	0.0188915	0.984928	0.00659567	NO
TCGA-AG-A00C-01A-21R-A076-13	READ	MIR758	hsa-mir-758	chr14	+	both	101026106	NA	flanking-3	NA	NA	14	G	T	21.6332	21.4583	1.00815	0.0117104	0.818979	1	0.0185952	0.985164	0.00649147	NO
TCGA-EO-A22T-01A-21R-A18L-13	UCEC	MIR424	hsa-mir-424	chrX	-	5p	134546629	NA	flanking-3	NA	NA	15	T	C	192.568	191.182	1.00725	0.0104163	0.838276	1	0.00893765	0.992869	0.0031081	NO
TCGA-VS-A959-01A-11R-A42V-13	CESC	MIR320A	hsa-mir-320a	chr8	-	3p	22244961	NA	flanking-3	NA	NA	14	C	T	775.433	772.776	1.00344	0.00495215	0.893256	1	0.00770255	0.993854	0.00267727	NO
TCGA-G4-6293-01A-11H-1722-13	COAD	MIR431	hsa-mir-431	chr14	+	3p	100881075	COSM1368246	seed_3p	7	NA	NA	G	A	16.4895	16.5531	0.996157	-0.00555504	0.884234	1	-0.00701769	0.994401	0.00243856	NO
TCGA-13-1477-01A-01R-1565-13	OV	MIR505	hsa-mir-505	chrX	-	3p	139924228	NA	flanking-5	NA	NA	-11	C	T	136.904	137.569	0.995162	-0.00699615	0.839366	1	-0.00918093	0.992675	0.00319301	NO
TCGA-CV-6955-01A-11R-2015-13	HNSC	MIR222	hsa-mir-222	chrX	-	3p	45747065	COSN2377957	loop	NA	8	NA	C	T	123.518	124.173	0.994727	-0.00762763	0.823946	1	-0.00977044	0.992204	0.00339883	NO
TCGA-PG-A917-01A-31R-A37P-13	UCEC	MIR671	hsa-mir-671	chr7	+	5p	151238532	NA	flanking-3	NA	NA	24	C	T	13.7796	13.8799	0.992772	-0.0104649	0.730588	1	-0.0151086	0.987946	0.00526699	NO
TCGA-66-2787-01A-01T-0981-13	LUSC	MIR664A	hsa-mir-664a	chr1	-	both	220200538	NA	flanking-3	NA	NA	11	T	G	23.6789	23.8668	0.992126	-0.0114054	0.626499	1	-0.0225591	0.982002	0.00788764	NO
TCGA-EO-A3AU-01A-21R-A19V-13	UCEC	MIR182	hsa-mir-182	chr7	-	5p	129770491	NA	flanking-5	NA	NA	-21	TC	T	17953.5	18165.4	0.988336	-0.0169261	0.726092	1	-0.0153271	0.987771	0.00534362	NO
TCGA-61-1911-01A-01R-1567-13	OV	MIR4728	hsa-mir-4728	chr17	+	both	39726473	NA	flanking-5	NA	NA	-23	T	G	23.8825	24.2031	0.986756	-0.0192343	0.675495	1	-0.0189614	0.984872	0.00662027	NO
TCGA-LN-A5U5-01A-21R-A28K-13	ESCA	MIR2355	hsa-mir-2355	chr2	-	both	207109983	NA	flanking-3	NA	NA	16	T	A	37.4293	37.9616	0.985979	-0.0203712	0.801355	1	-0.0186768	0.985099	0.00652015	NO
TCGA-AA-3833-01A-01T-0906-13	COAD	MIRLET7C	hsa-let-7c	chr21	+	5p	16539833	NA	flanking-5	NA	NA	-5	C	T	665.136	674.601	0.98597	-0.0203848	0.641742	1	-0.0223749	0.982149	0.00782267	NO
TCGA-EE-A20C-06A-11R-A18V-13	SKCM	MIR511	hsa-mir-511	chr10	+	3p	17845147	NA	loop	NA	5	NA	A	T	20.6479	21.1658	0.975531	-0.0357406	0.544612	1	-0.0286138	0.977173	0.0100287	NO
TCGA-95-7039-01A-11H-1948-13	LUAD	MIR523	hsa-mir-523	chr19	+	5p	53698402	COSN24410711	seed_5p	3	NA	NA	C	A	2.5296	2.60071	0.972656	-0.0399984	0.567924	1	-0.0253806	0.979751	0.0088841	NO
TCGA-98-A538-01A-11H-A263-13	LUSC	MIR21	hsa-mir-21	chr17	+	5p	59841267	NA	flanking-5	NA	NA	-6	G	T	294208	303985	0.967839	-0.0471613	0.0124978	1	-0.116159	0.907527	0.0421406	NO
TCGA-Z6-A8JE-01A-11R-A37J-13	ESCA	MIR590	hsa-mir-590	chr7	+	both	74191194	NA	flanking-5	NA	NA	-19	C	T	17.1254	17.7034	0.967348	-0.0478926	0.399265	1	-0.0626304	0.950061	0.0222486	NO
TCGA-EE-A180-06A-11R-A21E-13	SKCM	MIR493	hsa-mir-493	chr14	+	both	100869153	NA	flanking-3	NA	NA	16	C	T	10.2571	10.6659	0.961673	-0.0563822	0.456536	1	-0.0352473	0.971883	0.0123862	NO
TCGA-C8-A274-01A-11R-A16E-13	BRCA	MIR766	hsa-mir-766	chrX	-	both	119646766	COSN4710443	non-seed duplex_3p	19	NA	NA	G	A	9.51291	9.90315	0.960595	-0.0579998	0.0325376	1	-0.0653462	0.947898	0.0232382	NO
TCGA-AX-A1C5-01A-11R-A136-13	UCEC	MIR25	hsa-mir-25	chr7	-	3p	100093626	COSN19728907	seed_5p	5	NA	NA	C	T	11576.4	12057.8	0.960077	-0.0587783	0.0482071	1	-0.0865876	0.930999	0.0310506	NO
TCGA-HZ-8636-01A-21R-2401-13	PAAD	MIR342	hsa-mir-342	chr14	+	3p	100109659	NA	flanking-5	NA	NA	-14	C	T	86.1915	89.7945	0.959875	-0.0590821	0.2911	1	-0.0848139	0.932409	0.0303934	NO
TCGA-BR-4201-01A-01R-1131-13	STAD	MIR30E	hsa-mir-30e	chr1	+	5p	40754448	NA	flanking-3	NA	NA	14	G	A	8538.1	8942.88	0.954737	-0.0668249	0.0099301	1	-0.12608	0.899669	0.0459174	NO
TCGA-93-A4JO-01A-21H-A24S-13	LUAD	MIR1306	hsa-mir-1306	chr22	+	both	20086069	NA	flanking-5	NA	NA	-3	C	T	11.9838	12.556	0.954425	-0.0672957	0.0590463	1	-0.0838658	0.933163	0.0300424	NO
TCGA-GC-A6I1-01A-12R-A31R-13	BLCA	MIR10397	hsa-mir-10397	chr5	+	both	10402396	NA	loop	NA	11	NA	C	G	11.3949	11.9701	0.951943	-0.071053	0.148084	1	-0.0720066	0.942597	0.0256741	NO
TCGA-B5-A0K6-01A-11R-A041-13	UCEC	MIR125A	hsa-mir-125a	chr19	+	5p	51693267	COSN2382193	flanking-5	NA	NA	-1	G	T	701.78	739.004	0.94963	-0.0745625	0.0100793	1	-0.113144	0.909916	0.0409985	NO
TCGA-55-8089-01A-11H-2240-13	LUAD	MIR409	hsa-mir-409	chr14	+	both	101065372	COSN24410127	flanking-3	NA	NA	5	G	T	16.4848	17.3987	0.947473	-0.0778429	0.201012	1	-0.0568058	0.9547	0.0201331	NO
TCGA-NC-A5HD-01A-11H-A26V-13	LUSC	MIR652	hsa-mir-652	chrX	+	3p	110055341	NA	flanking-5	NA	NA	-8	G	A	60.6072	64.154	0.944714	-0.0820501	0.00862534	1	-0.122192	0.902747	0.0444339	NO
TCGA-BS-A0TC-01A-11R-A103-13	UCEC	MIR369	hsa-mir-369	chr14	+	3p	101065639	COSN1080976	loop	NA	12	NA	C	T	6.74582	7.14947	0.943541	-0.0838436	0.117683	1	-0.0685271	0.945366	0.0244	NO
TCGA-CM-6679-01A-11H-1838-13	COAD	MIR22	hsa-mir-22	chr17	-	3p	1713945	NA	loop	NA	7	NA	C	G	56228.6	59605.9	0.94334	-0.084151	8.98063e-06	0.00611581	-0.215976	0.829007	0.081442	NO
TCGA-CK-6747-01A-11H-1838-13	COAD	MIR379	hsa-mir-379	chr14	+	5p	101022093	COSN7428815	loop	NA	2	NA	G	A	736.83	782.679	0.941421	-0.0870881	0.00536356	1	-0.134645	0.892892	0.0492009	NO
TCGA-39-5019-01A-01T-1819-13	LUSC	MIR106B	hsa-mir-106b	chr7	-	5p	100094036	COSN493976	loop	NA	7	NA	G	A	852.669	909.929	0.937073	-0.0937667	0.00284803	1	-0.138956	0.889485	0.0508614	NO
TCGA-BG-A0MI-01A-11R-A041-13	UCEC	MIR505	hsa-mir-505	chrX	-	3p	139924225	NA	flanking-5	NA	NA	-8	G	T	90.4955	96.6516	0.936306	-0.0949476	0.00527604	1	-0.122617	0.90241	0.0445961	NO
TCGA-EE-A20C-06A-11R-A18V-13	SKCM	MIR518D	hsa-mir-518d	chr19	+	both	53734924	NA	loop	NA	11	NA	G	A	1.853	1.98884	0.9317	-0.102062	0.263608	1	-0.0530013	0.957731	0.0187565	NO
TCGA-EE-A2GO-06A-11R-A18V-13	SKCM	MIR520A	hsa-mir-520a	chr19	+	both	53690948	COSN5028198	non-seed duplex_3p	16	NA	NA	G	A	1.98375	2.13454	0.929356	-0.105697	0.260501	1	-0.0537115	0.957165	0.0190132	NO
TCGA-HP-A5MZ-01A-21R-A27R-13	LIHC	MIR590	hsa-mir-590	chr7	+	both	74191195	NA	flanking-5	NA	NA	-18	C	T	19.712	21.2551	0.927398	-0.108739	0.00037294	0.253972	-0.186983	0.851674	0.0697268	NO
TCGA-AA-A022-01A-21R-A082-13	COAD	MIR758	hsa-mir-758	chr14	+	both	101026106	NA	flanking-3	NA	NA	14	GC	G	21.4191	23.1095	0.926851	-0.109591	0.00251714	1	-0.14622	0.883748	0.0536716	NO
TCGA-GN-A8LK-06A-11R-A37G-13	SKCM	MIR382	hsa-mir-382	chr14	+	5p	101054377	NA	flanking-3	NA	NA	5	C	T	13.0401	14.0763	0.926391	-0.110307	0.926116	1	-0.0659731	0.948174	0.023112	NO
TCGA-EE-A2MI-06A-11R-A18X-13	SKCM	MIR382	hsa-mir-382	chr14	+	5p	101054377	NA	flanking-3	NA	NA	5	C	T	13.0401	14.0763	0.926391	-0.110307	0.926116	1	-0.0659731	0.948174	0.023112	NO
TCGA-24-1422-01A-01R-1565-13	OV	MIR423	hsa-mir-423	chr17	+	5p	30117165	NA	flanking-3	NA	NA	12	A	C	665.845	720.618	0.923992	-0.114048	4.46126e-06	0.00303812	-0.210094	0.833595	0.0790451	NO
TCGA-FA-A6HN-01A-11R-A31S-13	DLBC	MIR21	hsa-mir-21	chr17	+	5p	59841260	NA	flanking-5	NA	NA	-13	C	G	374606	405957	0.922774	-0.11595	0.119782	1	-0.233817	0.815127	0.0887748	NO
TCGA-IN-8462-01A-11R-2343-13	STAD	MIRLET7E	hsa-let-7e	chr19	+	5p	51692779	NA	flanking-5	NA	NA	-14	C	T	884.208	959.171	0.921846	-0.117402	0.00136097	0.926819	-0.156959	0.875277	0.0578543	NO
TCGA-BC-A217-01A-11R-A154-13	LIHC	MIR424	hsa-mir-424	chrX	-	5p	134546724	NA	flanking-5	NA	NA	-23	G	T	87.2843	95.0051	0.918732	-0.122283	0.00985974	1	-0.135049	0.892573	0.0493562	NO
TCGA-B4-5844-01A-11R-1671-13	KIRC	MIR328	hsa-mir-328	chr16	-	3p	67202381	COSN525546	non-seed duplex_5p	9	NA	NA	T	C	81.4953	88.9813	0.915871	-0.126784	2.94405e-05	0.020049	-0.188769	0.850274	0.070441	NO
TCGA-AA-3692-01A-01T-0906-13	COAD	MIR508	hsa-mir-508	chrX	-	3p	147236931	NA	flanking-3	NA	NA	14	G	A	6.53449	7.16766	0.911662	-0.133429	0.0866804	1	-0.0825178	0.934235	0.0295439	NO
TCGA-ZF-A9RC-01A-11R-A38M-13	BLCA	MIR517A	hsa-mir-517a	chr19	+	3p	53712351	NA	flanking-3	NA	NA	9	G	C	1.86948	2.06623	0.904778	-0.144364	0.0900214	1	-0.0845467	0.932622	0.0302945	NO
TCGA-CM-4746-01A-01T-1409-13	COAD	MIR205	hsa-mir-205	chr1	+	5p	209432200	NA	loop	NA	13	NA	C	T	2.18158	2.41328	0.90399	-0.145621	0.140188	1	-0.0710189	0.943383	0.0253121	NO
TCGA-AJ-A8CW-01A-11R-A37P-13	UCEC	MIR27A	hsa-mir-27a	chr19	-	3p	13836441	NA	flanking-3	NA	NA	6	TG	T	1455.49	1612.64	0.90255	-0.147921	6.34162e-06	0.00431864	-0.199843	0.841603	0.0748925	NO
TCGA-39-5036-01A-01T-1442-13	LUSC	MIR181D	hsa-mir-181d	chr19	+	5p	13874992	NA	flanking-3	NA	NA	19	G	T	22.2718	24.744	0.900088	-0.151862	0.000247855	0.168789	-0.171079	0.864162	0.0634051	NO
TCGA-D5-5540-01A-01T-1652-13	COAD	MIR369	hsa-mir-369	chr14	+	3p	101065584	NA	flanking-5	NA	NA	-22	G	A	11.0446	12.2876	0.898841	-0.153861	6.36059e-06	0.00433156	-0.219904	0.825946	0.0830484	NO
TCGA-EE-A2MD-06A-11R-A18W-13	SKCM	MIR362	hsa-mir-362	chrX	+	5p	50008956	NA	flanking-5	NA	NA	-12	C	T	95.0586	106.334	0.893961	-0.161716	0.0145956	1	-0.115707	0.907885	0.0419693	NO
TCGA-AJ-A3BG-01A-11R-A19V-13	UCEC	MIRLET7D	hsa-let-7d	chr9	+	5p	94178817	NA	flanking-5	NA	NA	-24	GAA	G	763.532	859.314	0.888537	-0.170497	1.38527e-08	9.43371e-06	-0.255978	0.797968	0.0980147	NO
TCGA-EY-A2OP-01A-11R-A19V-13	UCEC	MIR452	hsa-mir-452	chrX	-	5p	151959720	NA	flanking-5	NA	NA	-21	A	C	33.9896	38.2798	0.887925	-0.17149	0.00130858	0.891142	-0.141309	0.887626	0.05177	NO
TCGA-CG-4442-01A-01R-1157-13	STAD	MIR431	hsa-mir-431	chr14	+	3p	100881044	COSM4049095	non-seed duplex_5p	19	NA	NA	G	A	9.22423	10.4	0.886945	-0.173083	6.33763e-05	0.0431592	-0.196457	0.844253	0.0735275	NO
TCGA-D8-A1JB-01A-11R-A13P-13	BRCA	MIR185	hsa-mir-185	chr22	+	5p	20033224	NA	flanking-3	NA	NA	15	A	T	56.443	63.8474	0.884029	-0.177834	3.35201e-19	2.28272e-16	-0.278687	0.780485	0.107636	NO
TCGA-V3-A9ZX-01A-11R-A40B-13	UVM	MIR125A	hsa-mir-125a	chr19	+	5p	51693260	NA	flanking-5	NA	NA	-8	T	A	3383.92	3832.73	0.882902	-0.179675	0.00818838	1	-0.305303	0.760136	0.119109	NO
TCGA-49-AARQ-01A-11H-A41D-13	LUAD	MIR369	hsa-mir-369	chr14	+	3p	101065671	NA	flanking-3	NA	NA	10	C	G	6.63002	7.52408	0.881174	-0.182501	0.00134115	0.913324	-0.143085	0.886223	0.0524568	NO
TCGA-AJ-A3BG-01A-11R-A19V-13	UCEC	MIR744	hsa-mir-744	chr17	+	5p	12081958	NA	loop	NA	28	NA	C	T	81.3181	92.3111	0.880914	-0.182927	2.03081e-07	0.000138298	-0.230537	0.817675	0.0874194	NO
TCGA-BS-A0U8-01A-11R-A103-13	UCEC	MIR671	hsa-mir-671	chr7	+	5p	151238441	NA	flanking-5	NA	NA	-8	G	T	12.2144	13.8799	0.880009	-0.18441	2.45387e-09	1.67108e-06	-0.266239	0.790055	0.102343	NO
TCGA-FS-A1ZD-06A-11R-A18W-13	SKCM	MIR409	hsa-mir-409	chr14	+	both	101065343	COSN2381577	loop	NA	7	NA	G	A	18.6844	21.2915	0.877555	-0.188438	0.0182454	1	-0.112192	0.910671	0.0406383	NO
TCGA-DI-A0WH-01A-12R-A12H-13	UCEC	MIR27A	hsa-mir-27a	chr19	-	3p	13836448	COSN2382145	non-seed duplex_3p	20	NA	NA	C	T	1411.06	1613.82	0.874365	-0.193692	4.33237e-09	2.95034e-06	-0.261663	0.793581	0.100409	NO
TCGA-CG-5730-01A-11R-1602-13	STAD	MIR382	hsa-mir-382	chr14	+	5p	101054348	NA	loop	NA	11	NA	G	T	15.2807	17.6567	0.865433	-0.208506	8.78773e-07	0.000598445	-0.243279	0.807789	0.0927019	NO
TCGA-33-AASI-01A-22H-A404-13	LUSC	MIR362	hsa-mir-362	chrX	+	5p	50008953	NA	flanking-5	NA	NA	-15	C	G	12.0595	13.9774	0.862787	-0.212924	8.1569e-09	5.55485e-06	-0.272365	0.785341	0.104942	NO
TCGA-G3-A7M5-01A-11R-A343-13	LIHC	MIR518E	hsa-mir-518e	chr19	+	5p	53729846	NA	flanking-5	NA	NA	-7	T	A	3.95675	4.59398	0.86129	-0.21543	0.154051	1	-0.0743548	0.940728	0.0265359	NO
TCGA-EY-A548-01A-11R-A27R-13	UCEC	MIR23A	hsa-mir-23a	chr19	-	3p	13836674	NA	flanking-5	NA	NA	-23	AG	A	3107.06	3629.69	0.856012	-0.224297	3.9621e-14	2.69819e-11	-0.340111	0.733773	0.134438	NO
TCGA-60-2703-01A-11H-2044-13	LUSC	MIR145	hsa-mir-145	chr5	+	5p	149430694	NA	loop	NA	11	NA	G	C	1009.63	1184.39	0.852445	-0.230322	5.13316e-10	3.49568e-07	-0.294151	0.768643	0.114275	NO
TCGA-EE-A3J5-06A-11R-A20E-13	SKCM	MIR432	hsa-mir-432	chr14	+	5p	100884530	COSM1707885	loop	NA	12	NA	C	T	7.40217	8.74042	0.84689	-0.239754	0.84366	1	-0.139748	0.88945	0.0508785	NO
TCGA-EE-A2MJ-06A-11R-A18V-13	SKCM	MIR432	hsa-mir-432	chr14	+	5p	100884530	COSM1707885	loop	NA	12	NA	C	T	7.40217	8.74042	0.84689	-0.239754	0.84366	1	-0.139748	0.88945	0.0508785	NO
TCGA-F4-6856-01A-11H-1927-13	COAD	MIR15A	hsa-mir-15a	chr13	-	5p	50049206	NA	flanking-5	NA	NA	-18	A	AT	101.733	120.173	0.846556	-0.240323	0.607358	1	-0.364485	0.715858	0.145173	NO
TCGA-A6-6653-01A-11H-1773-13	COAD	MIR15A	hsa-mir-15a	chr13	-	5p	50049206	NA	flanking-5	NA	NA	-18	A	AT	101.733	120.173	0.846556	-0.240323	0.607358	1	-0.364485	0.715858	0.145173	NO
TCGA-AX-A2IN-01A-12R-A17X-13	UCEC	MIR335	hsa-mir-335	chr7	+	5p	130496154	NA	loop	NA	6	NA	A	G	114.525	136.164	0.841079	-0.249688	3.2754e-08	2.23054e-05	-0.245335	0.806197	0.0935586	NO
TCGA-D1-A17M-01A-21R-A12H-13	UCEC	MIR32	hsa-mir-32	chr9	-	5p	109046215	NA	flanking-3	NA	NA	16	G	A	34.4016	40.9202	0.840701	-0.250335	3.50798e-13	2.38893e-10	-0.326433	0.744097	0.128371	NO
TCGA-37-3792-01A-01T-0981-13	LUSC	MIR32	hsa-mir-32	chr9	-	5p	109046214	NA	flanking-3	NA	NA	17	T	A	25.3987	30.2283	0.84023	-0.251144	5.86909e-14	3.99685e-11	-0.359377	0.719313	0.143082	NO
TCGA-E2-A10C-01A-21R-A10I-13	BRCA	MIR127	hsa-mir-127	chr14	+	3p	100883069	NA	flanking-3	NA	NA	13	C	T	760.221	911.513	0.83402	-0.261845	8.16418e-18	5.55981e-15	-0.267241	0.789284	0.102767	NO
TCGA-DK-A3X1-01A-12R-A22V-13	BLCA	MIR330	hsa-mir-330	chr19	-	3p	45639038	NA	loop	NA	11	NA	G	A	46.1152	55.4027	0.832364	-0.264713	5.20019e-09	3.54133e-06	-0.297803	0.765853	0.115854	NO
TCGA-DR-A0ZM-01A-12R-A10V-13	CESC	MIR328	hsa-mir-328	chr16	-	3p	67202338	COSN2376590	non-seed duplex_3p	11	NA	NA	G	A	20.5087	24.6943	0.830502	-0.267944	2.67873e-10	1.82422e-07	-0.37485	0.707772	0.150107	NO
TCGA-CG-4437-01A-01R-1802-13	STAD	MIR1301	hsa-mir-1301	chr2	-	3p	25328726	NA	flanking-5	NA	NA	-19	T	C	7.2358	8.73325	0.828534	-0.271367	5.91528e-08	4.0283e-05	-0.268415	0.78838	0.103265	NO
TCGA-57-1993-01A-01R-1568-13	OV	MIR6808	hsa-mir-6808	chr1	-	3p	1339675	NA	loop	NA	7	NA	A	G	7.42054	8.96831	0.827417	-0.273313	1.39838e-09	9.52298e-07	-0.279517	0.779848	0.10799	NO
TCGA-91-6829-01A-21H-1857-13	LUAD	MIR365A	hsa-mir-365a	chr16	+	3p	14309314	COSN24408400	non-seed duplex_5p	15	NA	NA	G	T	34.1441	41.2899	0.826936	-0.274153	1.81297e-11	1.23463e-08	-0.304774	0.760538	0.118879	NO
TCGA-BH-A5IZ-01A-11R-A27U-13	BRCA	MIR221	hsa-mir-221	chrX	-	3p	45746169	NA	flanking-3	NA	NA	11	C	T	96.7377	117.734	0.821661	-0.283385	2.61295e-20	1.77942e-17	-0.287937	0.773395	0.111599	NO
TCGA-AA-3949-01A-01T-1021-13	COAD	MIR150	hsa-mir-150	chr19	-	5p	49500856	NA	flanking-5	NA	NA	-3	G	T	386.708	471.842	0.819572	-0.287057	1.43124e-08	9.74674e-06	-0.277778	0.781183	0.107247	NO
TCGA-90-A4ED-01A-31H-A25B-13	LUSC	MIR342	hsa-mir-342	chr14	+	3p	100109708	NA	loop	NA	15	NA	G	A	144.481	176.561	0.818309	-0.289282	3.27181e-23	2.2281e-20	-0.485459	0.627351	0.202489	NO
TCGA-AJ-A23O-01A-11R-A156-13	UCEC	MIR671	hsa-mir-671	chr7	+	5p	151238446	NA	flanking-5	NA	NA	-3	A	T	11.3113	13.8799	0.814939	-0.295235	1.25504e-20	8.54682e-18	-0.426241	0.669932	0.173969	NO
TCGA-EW-A1IX-01A-12R-A143-13	BRCA	MIR142	hsa-mir-142	chr17	-	both	58331303	COSN23015190	non-seed duplex_5p	1	NA	NA	G	T	1086.6	1338.86	0.811584	-0.301187	6.56075e-14	4.46787e-11	-0.231938	0.816586	0.0879978	NO
TCGA-FD-A6TI-01A-11R-A32J-13	BLCA	MIR379	hsa-mir-379	chr14	+	5p	101022067	NA	flanking-5	NA	NA	-4	G	C	604.16	744.71	0.811269	-0.301748	2.90907e-09	1.98107e-06	-0.30213	0.762553	0.11773	NO
TCGA-AA-3833-01A-01T-0906-13	COAD	MIR140	hsa-mir-140	chr16	+	3p	69933129	NA	loop	NA	5	NA	C	T	904.322	1117.11	0.809517	-0.304867	1.98889e-45	1.35444e-42	-0.768307	0.442305	0.354278	NO
TCGA-22-5483-01A-01T-1819-13	LUSC	MIR362	hsa-mir-362	chrX	+	5p	50008951	NA	flanking-5	NA	NA	-17	G	A	11.262	13.9774	0.805726	-0.311639	1.27157e-16	8.65941e-14	-0.398638	0.69016	0.16105	NO
TCGA-A6-5659-01A-01T-1652-13	COAD	MIRLET7E	hsa-let-7e	chr19	+	5p	51692878	NA	flanking-3	NA	NA	19	G	A	738.824	919.345	0.803641	-0.315377	1.40854e-25	9.59212e-23	-0.536932	0.591314	0.228182	NO
TCGA-DX-A23Y-01A-11R-A27U-13	SARC	MIR2355	hsa-mir-2355	chr2	-	both	207109977	NA	flanking-3	NA	NA	22	G	A	29.928	37.4285	0.799603	-0.322644	7.84366e-08	5.34153e-05	-0.34432	0.730606	0.136317	NO
TCGA-55-8092-01A-11H-2240-13	LUAD	MIR93	hsa-mir-93	chr7	-	5p	100093770	NA	flanking-3	NA	NA	7	G	A	3184.13	3998.56	0.796319	-0.328582	1.49517e-22	1.01821e-19	-0.454517	0.649457	0.18745	NO
TCGA-FR-A8YE-06A-11R-A37G-13	SKCM	MIR379	hsa-mir-379	chr14	+	5p	101022145	NA	flanking-3	NA	NA	15	C	T	287.088	361.048	0.79515	-0.330701	0.000129714	0.088335	-0.182819	0.85494	0.0680644	NO
TCGA-AN-A0XW-01A-11R-A108-13	BRCA	MIR193B	hsa-mir-193b	chr16	+	3p	14303989	COSN23014894	non-seed duplex_5p	10	NA	NA	G	C	78.4391	98.7156	0.794597	-0.331705	8.68098e-28	5.91175e-25	-0.343131	0.7315	0.135786	NO
TCGA-21-1079-01A-01T-1557-13	LUSC	MIR526B	hsa-mir-526b	chr19	+	3p	53694478	NA	flanking-3	NA	NA	14	A	G	1.32131	1.66362	0.794237	-0.332358	1.20199e-07	8.18555e-05	-0.24908	0.803299	0.0951228	NO
TCGA-AX-A05S-01A-11R-A00W-13	UCEC	MIR500A	hsa-mir-500a	chrX	+	3p	50008455	COSN503234	non-seed duplex_5p	13	NA	NA	C	A	391.544	493.783	0.792947	-0.334703	2.89671e-18	1.97266e-15	-0.39641	0.691803	0.160018	NO
TCGA-B5-A0JR-01A-13R-A041-13	UCEC	MIR188	hsa-mir-188	chrX	+	5p	50003580	COSN503233	flanking-3	NA	NA	4	T	C	8.48212	10.7091	0.792051	-0.336335	1.35166e-18	9.20483e-16	-0.39979	0.689312	0.161584	NO
TCGA-ED-A459-01A-11R-A25Z-13	LIHC	MIR200A	hsa-mir-200a	chr1	+	3p	1167893	COSN16303181	non-seed duplex_5p	16	NA	NA	T	A	43.5041	54.943	0.791803	-0.336786	0.00563615	1	-0.14516	0.884584	0.0532608	NO
TCGA-E7-A85H-01A-11R-A358-13	BLCA	MIR410	hsa-mir-410	chr14	+	3p	101065991	NA	flanking-3	NA	NA	10	C	T	10.8828	13.8447	0.786062	-0.347285	3.24133e-11	2.20735e-08	-0.339113	0.734524	0.133994	NO
TCGA-FF-8041-01A-11R-2212-13	DLBC	MIR142	hsa-mir-142	chr17	-	both	58331260	COSN4769864	seed_3p	8	NA	NA	A	G	16660	21210.3	0.78547	-0.348372	0.461766	1	-0.533414	0.594034	0.226189	NO
TCGA-FA-A4BB-01A-11R-A31S-13	DLBC	MIR142	hsa-mir-142	chr17	-	both	58331260	COSN4769864	seed_3p	8	NA	NA	A	G	16660	21210.3	0.78547	-0.348372	0.461766	1	-0.533414	0.594034	0.226189	NO
TCGA-EE-A2GM-06B-11R-A18V-13	SKCM	MIR205	hsa-mir-205	chr1	+	5p	209432197	NA	loop	NA	10	NA	C	T	9.37835	11.9936	0.781944	-0.354863	0.0433034	1	-0.0960687	0.923466	0.0345791	NO
TCGA-A6-6653-01A-11H-1773-13	COAD	MIR20A	hsa-mir-20a	chr13	+	5p	91351125	COSN23012485	non-seed duplex_3p	18	NA	NA	T	TA	306.816	392.386	0.781925	-0.354898	9.51186e-19	6.47758e-16	-0.445095	0.656251	0.18293	NO
TCGA-BR-A4J5-01A-21R-A252-13	STAD	MIR582	hsa-mir-582	chr5	-	5p	59703656	NA	loop	NA	10	NA	T	A	163.522	209.359	0.78106	-0.356494	8.79315e-12	5.98813e-09	-0.341425	0.732783	0.135024	NO
TCGA-EE-A2MR-06A-11R-A18V-13	SKCM	MIR493	hsa-mir-493	chr14	+	both	100869113	COSN5026504	loop	NA	17	NA	C	T	8.33055	10.6659	0.781044	-0.356525	3.27896e-06	0.00223297	-0.222882	0.823628	0.084269	NO
TCGA-D8-A1Y1-01A-21R-A14L-13	BRCA	MIR522	hsa-mir-522	chr19	+	3p	53751288	NA	flanking-3	NA	NA	3	C	T	2.37667	3.06162	0.776278	-0.365354	1.27365e-14	8.67355e-12	-0.238909	0.811176	0.0908849	NO
TCGA-Q1-A73O-01A-11R-A32K-13	CESC	MIR141	hsa-mir-141	chr12	+	3p	6964154	COSN16129757	loop	NA	20	NA	C	G	1226.03	1580.8	0.775576	-0.36666	8.27961e-12	5.63841e-09	-0.407891	0.683354	0.165354	NO
TCGA-EE-A3J5-06A-11R-A20E-13	SKCM	MIR410	hsa-mir-410	chr14	+	3p	101065985	NA	flanking-3	NA	NA	4	C	T	4.28523	5.54587	0.77269	-0.372039	2.70854e-07	0.000184451	-0.246748	0.805103	0.0941486	NO
TCGA-EE-A29H-06A-12R-A18V-13	SKCM	MIR526B	hsa-mir-526b	chr19	+	3p	53694472	NA	flanking-3	NA	NA	8	C	T	2.49661	3.26093	0.765615	-0.385309	0.000720637	0.490753	-0.161249	0.871897	0.0595348	NO
TCGA-BF-A1PV-01A-11R-A18X-13	SKCM	MIR758	hsa-mir-758	chr14	+	both	101026110	NA	flanking-3	NA	NA	18	C	T	8.38978	10.9727	0.764604	-0.387215	7.24676e-07	0.000493504	-0.237471	0.812291	0.0902882	NO
TCGA-44-7670-01A-11H-2065-13	LUAD	MIR503	hsa-mir-503	chrX	-	5p	134546414	NA	flanking-5	NA	NA	-21	AC	A	8.60496	11.2602	0.764191	-0.387994	6.38855e-15	4.3506e-12	-0.356335	0.72159	0.14171	NO
TCGA-CV-5443-01A-01R-1513-13	HNSC	MIR379	hsa-mir-379	chr14	+	5p	101022093	COSN7428815	loop	NA	2	NA	G	A	575.55	756.896	0.760408	-0.395154	2.89385e-16	1.97071e-13	-0.371052	0.710599	0.148375	NO
TCGA-CK-5916-01A-11H-1652-13	COAD	MIR30D	hsa-mir-30d	chr8	-	5p	134804874	NA	flanking-3	NA	NA	5	C	T	4592.21	6065.52	0.7571	-0.401444	1.14398e-36	7.79048e-34	-0.669151	0.503399	0.298088	NO
TCGA-CV-7568-01A-11R-2231-13	HNSC	MIR30A	hsa-mir-30a	chr6	-	5p	71403578	NA	loop	NA	17	NA	C	T	5203.17	6893.18	0.754828	-0.405781	1.44516e-19	9.84155e-17	-0.41407	0.678823	0.168244	NO
TCGA-FR-A3YN-06A-11R-A23A-13	SKCM	MIR31	hsa-mir-31	chr9	-	5p	21512116	COSN5030232	flanking-3	NA	NA	5	G	A	4.27275	5.66882	0.753729	-0.407883	1.84422e-06	0.00125591	-0.228118	0.819554	0.0864223	NO
TCGA-LN-A4MQ-01A-11R-A28K-13	ESCA	MIR99B	hsa-mir-99b	chr19	+	5p	51692653	NA	loop	NA	14	NA	A	G	7714.66	10247.5	0.752831	-0.409603	7.36463e-12	5.01531e-09	-0.54338	0.586868	0.23146	NO
TCGA-AX-A05Y-01A-11R-A00W-13	UCEC	MIR503	hsa-mir-503	chrX	-	5p	134546412	NA	flanking-5	NA	NA	-19	G	A	9.71786	12.9201	0.752151	-0.410906	2.01763e-17	1.37401e-14	-0.384763	0.700413	0.154646	NO
TCGA-46-3769-01A-01T-0981-13	LUSC	MIR196B	hsa-mir-196b	chr7	-	5p	27169539	COSN2378927	non-seed duplex_5p	11	NA	NA	G	A	242.929	323.761	0.750335	-0.414394	1.90539e-07	0.000129757	-0.244968	0.806481	0.0934059	NO
TCGA-AG-A026-01A-32R-A082-13	READ	MIR511	hsa-mir-511	chr10	+	3p	17845149	NA	loop	NA	7	NA	A	AT	7.20645	9.65364	0.746501	-0.421783	1.19196e-10	8.11725e-08	-0.559323	0.575941	0.239622	NO
TCGA-CV-7089-01A-11R-2015-13	HNSC	MIR330	hsa-mir-330	chr19	-	3p	45639012	COSN498826	non-seed duplex_3p	20	NA	NA	C	T	37.7903	50.8888	0.742605	-0.429333	9.15303e-41	6.23321e-38	-0.641655	0.521097	0.283081	NO
TCGA-3N-A9WC-06A-11R-A38N-13	SKCM	MIR520A	hsa-mir-520a	chr19	+	both	53690904	COSN2532241	non-seed duplex_5p	10	NA	NA	G	A	1.57773	2.13524	0.738899	-0.436552	4.33238e-06	0.00295035	-0.221836	0.824442	0.08384	NO
TCGA-G4-6304-01A-11H-1927-13	COAD	MIR99B	hsa-mir-99b	chr19	+	5p	51692648	COSN1082437	loop	NA	9	NA	G	A	15027.5	20383.1	0.737252	-0.439769	1.00433e-42	6.83946e-40	-0.738419	0.46026	0.336997	NO
TCGA-D8-A1JE-01A-11R-A13P-13	BRCA	MIR320A	hsa-mir-320a	chr8	-	3p	22245044	NA	flanking-5	NA	NA	-16	G	T	481.038	653.214	0.736417	-0.441404	2.36829e-74	1.61281e-71	-0.603225	0.546359	0.262522	NO
TCGA-DA-A95V-06A-11R-A37G-13	SKCM	MIR331	hsa-mir-331	chr12	+	3p	95308515	NA	flanking-3	NA	NA	15	C	T	25.0398	34.0303	0.735811	-0.442593	5.80207e-30	3.95121e-27	-0.578915	0.562647	0.249764	NO
TCGA-BR-4368-01A-01R-1157-13	STAD	MIR598	hsa-mir-598	chr8	-	3p	11035209	NA	flanking-3	NA	NA	12	G	A	15.4846	21.2256	0.729526	-0.454968	1.99691e-15	1.3599e-12	-0.402813	0.687086	0.162989	NO
TCGA-D8-A1JG-01B-11R-A13P-13	BRCA	MIR140	hsa-mir-140	chr16	+	3p	69933099	COSN23014990	flanking-5	NA	NA	-4	C	T	529.492	729.639	0.725691	-0.462573	7.38008e-78	5.02584e-75	-0.620092	0.535197	0.271486	NO
TCGA-D8-A27G-01A-11R-A16E-13	BRCA	MIR190B	hsa-mir-190b	chr1	-	5p	154193702	COSN23013920	loop	NA	10	NA	C	T	9.48369	13.0887	0.72457	-0.464803	1.21621e-17	8.28242e-15	-0.265766	0.79042	0.102142	NO
TCGA-EE-A3JD-06A-11R-A20E-13	SKCM	MIR432	hsa-mir-432	chr14	+	5p	100884472	NA	flanking-5	NA	NA	-24	G	A	6.29534	8.74042	0.720257	-0.473417	1.08035e-08	7.35715e-06	-0.275946	0.78259	0.106466	NO
TCGA-BS-A0U8-01A-11R-A103-13	UCEC	MIR125A	hsa-mir-125a	chr19	+	5p	51693309	COSN2382192	seed_3p	4	NA	NA	G	T	531.544	739.031	0.719244	-0.475447	2.47304e-49	1.68414e-46	-0.72137	0.470682	0.327272	NO
TCGA-DI-A2QU-01A-11R-A18L-13	UCEC	MIR223	hsa-mir-223	chrX	+	3p	66018892	NA	flanking-5	NA	NA	-3	C	A	145.872	203.276	0.717605	-0.478739	5.95831e-13	4.05761e-10	-0.323043	0.746662	0.126876	NO
TCGA-G4-6628-01A-11H-1838-13	COAD	MIR337	hsa-mir-337	chr14	+	both	100874507	NA	flanking-5	NA	NA	-8	G	T	20.147	28.1281	0.716259	-0.481447	3.54163e-39	2.41185e-36	-0.697679	0.485378	0.31392	NO
TCGA-UU-A93S-01A-21R-A41G-13	BRCA	MIR125A	hsa-mir-125a	chr19	+	5p	51693330	NA	flanking-3	NA	NA	3	G	T	491.951	687.274	0.7158	-0.482371	1.51438e-105	1.03129e-102	-0.747596	0.454704	0.342271	NO
TCGA-JX-A3Q0-01A-11R-A21U-13	CESC	MIR345	hsa-mir-345	chr14	+	5p	100307856	NA	flanking-5	NA	NA	-20	G	A	15.5065	21.7017	0.71453	-0.484933	2.54857e-16	1.73558e-13	-0.497615	0.618756	0.208481	NO
TCGA-A6-2674-01A-02T-0822-13_GRCh37-lite	COAD	MIR10B	hsa-mir-10b	chr2	+	5p	176150360	NA	loop	NA	9	NA	G	A	25298.4	35463.9	0.713357	-0.487303	2.4197e-40	1.64782e-37	-0.711798	0.47659	0.321855	NO
TCGA-D1-A16J-01A-11R-A12H-13	UCEC	MIR330	hsa-mir-330	chr19	-	3p	45639012	COSN498826	non-seed duplex_3p	20	NA	NA	C	T	32.858	46.2996	0.709682	-0.494754	1.31693e-33	8.96827e-31	-0.567786	0.57018	0.243988	NO
TCGA-G3-A5SM-01A-12R-A28Z-13	LIHC	MIR452	hsa-mir-452	chrX	-	5p	151959683	COSN16303043	non-seed duplex_5p	17	NA	NA	T	A	110.328	155.565	0.709208	-0.49572	1.18499e-08	8.06981e-06	-0.304151	0.761013	0.118608	NO
TCGA-AM-5821-01A-01T-1652-13	COAD	MIR139	hsa-mir-139	chr11	-	5p	72615096	COSN18276733	loop	NA	6	NA	A	G	37.3213	52.7097	0.708052	-0.498072	4.93385e-38	3.35996e-35	-0.685681	0.492914	0.307229	NO
TCGA-78-7166-01A-12H-2065-13	LUAD	MIR629	hsa-mir-629	chr15	-	5p	70079457	NA	flanking-5	NA	NA	-10	C	A	92.0998	130.119	0.70781	-0.498566	2.76069e-44	1.88003e-41	-0.683489	0.494298	0.306011	NO
TCGA-66-2780-01A-01T-1557-13	LUSC	MIR30B	hsa-mir-30b	chr8	-	5p	134800559	NA	loop	NA	11	NA	C	G	234.7	333.049	0.704703	-0.504912	4.21135e-38	2.86793e-35	-0.655971	0.511843	0.290863	NO
TCGA-P4-AAVL-01A-11R-A42U-13	KIRP	MIR140	hsa-mir-140	chr16	+	3p	69933178	NA	flanking-3	NA	NA	16	A	AC	1047.59	1487.57	0.704225	-0.505892	2.84138e-42	1.93498e-39	-0.993781	0.32033	0.494403	NO
TCGA-05-4397-01A-01T-1207-13	LUAD	MIR127	hsa-mir-127	chr14	+	3p	100883038	COSM6075319	seed_3p	4	NA	NA	G	T	426.419	610.408	0.698581	-0.517501	1.0547e-18	7.18248e-16	-0.407063	0.683962	0.164968	NO
TCGA-04-1347-01A-01R-1564-13	OV	MIR148A	hsa-mir-148a	chr7	-	3p	25949900	NA	flanking-3	NA	NA	22	T	G	3948.31	5680.22	0.695097	-0.524713	2.01614e-25	1.37299e-22	-0.499509	0.617421	0.209419	NO
TCGA-3C-AALK-01A-11R-A41G-13	BRCA	MIR221	hsa-mir-221	chrX	-	3p	45746225	COSN5776032	non-seed duplex_5p	18	NA	NA	C	A	80.3977	117.735	0.682871	-0.550314	2.72619e-65	1.85653e-62	-0.559153	0.576058	0.239534	NO
TCGA-CQ-6225-01A-11R-1914-13	HNSC	MIR140	hsa-mir-140	chr16	+	3p	69933129	NA	loop	NA	5	NA	C	T	580.047	852.755	0.680203	-0.555963	1.01474e-84	6.91038e-82	-1.0409	0.297921	0.525899	NO
TCGA-85-8351-01A-11H-2295-13	LUSC	MIR136	hsa-mir-136	chr14	+	both	100884757	COSM1368268	seed_3p	8	NA	NA	G	A	21.8509	32.2661	0.677209	-0.562326	2.24614e-29	1.52962e-26	-0.560569	0.575091	0.240263	NO
TCGA-DD-AAD8-01A-11R-A41H-13	LIHC	MIR372	hsa-mir-372	chr19	+	3p	53787975	NA	flanking-3	NA	NA	22	C	T	1.18775	1.77413	0.66948	-0.578887	1.12603e-11	7.66827e-09	-0.366124	0.714272	0.146136	NO
TCGA-EE-A3J7-06A-11R-A20E-13	SKCM	MIR505	hsa-mir-505	chrX	-	3p	139924139	NA	flanking-3	NA	NA	21	G	A	38.4211	57.4008	0.669349	-0.57917	3.5084e-38	2.38922e-35	-0.671579	0.501851	0.299425	NO
TCGA-D3-A3C8-06A-12R-A18V-13	SKCM	MIR328	hsa-mir-328	chr16	-	3p	67202413	NA	flanking-5	NA	NA	-24	G	A	139.442	209.129	0.666774	-0.584729	1.52604e-26	1.03923e-23	-0.537199	0.59113	0.228317	NO
TCGA-95-7043-01A-11H-1948-13	LUAD	MIR432	hsa-mir-432	chr14	+	5p	100884582	NA	flanking-3	NA	NA	18	C	T	4.48359	6.74635	0.664595	-0.589453	3.07783e-20	2.096e-17	-0.426412	0.669808	0.17405	NO
TCGA-D1-A0ZS-01A-11R-A119-13	UCEC	MIR942	hsa-mir-942	chr1	+	both	117094704	COSN494433	non-seed duplex_3p	10	NA	NA	G	A	8.57835	13.0974	0.654964	-0.610512	1.19305e-36	8.12467e-34	-0.598421	0.549559	0.259986	NO
TCGA-AA-3663-01A-01T-1722-13	COAD	MIR320A	hsa-mir-320a	chr8	-	3p	22244970	COSN23013034	flanking-3	NA	NA	5	CT	C	482.475	739.931	0.652055	-0.616935	1.14897e-41	7.82452e-39	-0.725594	0.468087	0.329673	NO
TCGA-GU-AATQ-01A-11R-A39B-13	BLCA	MIR409	hsa-mir-409	chr14	+	both	101065342	NA	loop	NA	6	NA	C	A	15.7859	24.3225	0.649023	-0.623658	1.62129e-34	1.1041e-31	-0.67053	0.50252	0.298847	NO
TCGA-AA-A01R-01A-21R-A082-13	COAD	MIR182	hsa-mir-182	chr7	-	5p	129770388	NA	flanking-3	NA	NA	18	G	A	7555.48	11656.6	0.648171	-0.625555	6.63775e-44	4.52031e-41	-0.750424	0.452999	0.343903	NO
TCGA-GN-A26C-01A-11R-A18W-13	SKCM	MIR379	hsa-mir-379	chr14	+	5p	101022098	NA	loop	NA	7	NA	G	A	233.82	361.048	0.647615	-0.626793	1.18647e-12	8.07988e-10	-0.346506	0.728963	0.137295	NO
TCGA-CJ-4912-01A-01R-1425-13	KIRC	MIR22	hsa-mir-22	chr17	-	3p	1713912	COSN2377436	flanking-3	NA	NA	2	C	A	40930.3	63288.3	0.646727	-0.628772	6.97827e-90	4.7522e-87	-1.11824	0.263465	0.579277	NO
TCGA-LN-A9FP-01A-31R-A38E-13	ESCA	MIR409	hsa-mir-409	chr14	+	both	101065302	NA	flanking-5	NA	NA	-12	G	T	12.4469	19.2812	0.645546	-0.631408	2.02647e-16	1.38003e-13	-0.67421	0.500178	0.300876	NO
TCGA-24-0975-01A-02R-1565-13	OV	MIR25	hsa-mir-25	chr7	-	3p	100093602	NA	loop	NA	8	NA	G	A	11617.4	18042.4	0.643893	-0.635107	1.06839e-63	7.27574e-61	-0.890405	0.373248	0.428002	NO
TCGA-DX-A6BE-01A-41R-A32L-13	SARC	MIR130B	hsa-mir-130b	chr22	+	3p	21653390	NA	flanking-3	NA	NA	15	C	T	24.6348	38.3024	0.643167	-0.636734	1.07458e-12	7.31789e-10	-0.466592	0.640792	0.193283	NO
TCGA-EB-A3Y7-01A-11R-A23A-13	SKCM	MIR127	hsa-mir-127	chr14	+	3p	100883033	COSM3493808	loop	NA	11	NA	C	T	284.988	445.468	0.639749	-0.644421	4.78303e-14	3.25724e-11	-0.368401	0.712575	0.14717	NO
TCGA-P3-A6T5-01A-11R-A34O-13	HNSC	MIR493	hsa-mir-493	chr14	+	both	100869102	COSN1081001	loop	NA	6	NA	G	A	8.87144	13.8825	0.639038	-0.646027	2.99579e-36	2.04013e-33	-0.597095	0.550444	0.259287	NO
TCGA-G3-A25Y-01A-11R-A16S-13	LIHC	MIR425	hsa-mir-425	chr3	-	5p	49020176	COSN16303086	seed_3p	5	NA	NA	C	T	105.024	164.546	0.638266	-0.647771	2.52432e-37	1.71906e-34	-0.747304	0.45488	0.342103	NO
TCGA-AA-3492-01A-01T-1409-13	COAD	MIR186	hsa-mir-186	chr1	-	5p	71067644	COSN18162915	non-seed duplex_3p	20	NA	NA	CA	C	185.494	291.393	0.636577	-0.651593	1.4662e-75	9.98485e-73	-1.08975	0.275821	0.559372	NO
TCGA-DD-AAE7-01A-11R-A41H-13	LIHC	MIR20A	hsa-mir-20a	chr13	+	5p	91351103	NA	loop	NA	9	NA	T	C	397.499	625.063	0.635934	-0.653052	9.96339e-33	6.78507e-30	-0.685689	0.492909	0.307233	NO
TCGA-EE-A2MS-06A-11R-A18V-13	SKCM	MIR409	hsa-mir-409	chr14	+	both	101065366	COSN23022149	non-seed duplex_3p	21	NA	NA	C	T	13.3951	21.2928	0.629088	-0.668666	0.574566	1	-0.398098	0.69063	0.160755	NO
TCGA-EE-A2MR-06A-11R-A18V-13	SKCM	MIR409	hsa-mir-409	chr14	+	both	101065366	COSN23022149	non-seed duplex_3p	21	NA	NA	C	T	13.3951	21.2928	0.629088	-0.668666	0.574566	1	-0.398098	0.69063	0.160755	NO
TCGA-CK-5913-01A-11H-1652-13	COAD	MIR99A	hsa-mir-99a	chr21	+	5p	16539135	NA	loop	NA	13	NA	G	A	96.4956	153.447	0.628851	-0.669209	0.425293	1	-0.565659	0.572074	0.242548	NO
TCGA-G4-6628-01A-11H-1838-13	COAD	MIR99A	hsa-mir-99a	chr21	+	5p	16539135	NA	loop	NA	13	NA	G	A	96.4956	153.447	0.628851	-0.669209	0.425293	1	-0.565659	0.572074	0.242548	NO
TCGA-CK-5916-01A-11H-1652-13	COAD	MIR432	hsa-mir-432	chr14	+	5p	100884536	COSM3689905	loop	NA	18	NA	G	A	6.76064	10.8643	0.622279	-0.684367	7.33655e-44	4.99619e-41	-0.749944	0.453288	0.343626	NO
TCGA-04-1646-01A-01R-1567-13	OV	MIR493	hsa-mir-493	chr14	+	both	100869061	NA	flanking-5	NA	NA	-14	TG	T	10.6458	17.1303	0.621459	-0.686268	5.25497e-28	3.57864e-25	-0.529273	0.596616	0.224305	NO
TCGA-W3-A825-06A-11R-A358-13	SKCM	MIR25	hsa-mir-25	chr7	-	3p	100093565	NA	flanking-3	NA	NA	6	G	A	14237.8	23025.9	0.618339	-0.693529	3.36179e-69	2.28938e-66	-0.996512	0.319001	0.496208	NO
TCGA-55-6987-01A-11H-1948-13	LUAD	MIR653	hsa-mir-653	chr7	-	both	93482813	NA	loop	NA	10	NA	G	A	7.83933	12.7392	0.61537	-0.700475	1.49108e-24	1.01543e-21	-0.477958	0.63268	0.198816	NO
TCGA-EE-A2MR-06A-11R-A18V-13	SKCM	MIR365B	hsa-mir-365b	chr17	+	3p	31575494	COSN5027839	non-seed duplex_3p	17	NA	NA	C	T	39.4686	64.4517	0.612375	-0.707513	1.34809e-41	9.1805e-39	-0.708904	0.478384	0.320223	NO
TCGA-4Z-AA7M-01A-11R-A39B-13	BLCA	MIR320A	hsa-mir-320a	chr8	-	3p	22245004	NA	loop	NA	3	NA	C	T	414.766	678.371	0.611414	-0.709778	1.73533e-51	1.18176e-48	-0.871502	0.38348	0.416257	NO
TCGA-D1-A17T-01A-11R-A12H-13	UCEC	MIR185	hsa-mir-185	chr22	+	5p	20033146	NA	flanking-5	NA	NA	-7	G	T	43.2922	70.8865	0.610725	-0.711406	3.56451e-83	2.42743e-80	-1.02167	0.306937	0.512951	NO
TCGA-22-5483-01A-01T-1819-13	LUSC	MIR135B	hsa-mir-135b	chr1	-	5p	205448386	NA	flanking-5	NA	NA	-3	C	T	18.5478	30.3796	0.610535	-0.711855	4.16803e-24	2.83843e-21	-0.497139	0.619091	0.208246	NO
TCGA-L5-A8NM-01A-11R-A37J-13	ESCA	MIR758	hsa-mir-758	chr14	+	both	101026106	NA	flanking-3	NA	NA	14	GC	G	7.83853	13.099	0.598405	-0.740805	9.65123e-19	6.57249e-16	-0.733893	0.463014	0.334406	NO
TCGA-D8-A27V-01A-12R-A17A-13	BRCA	MIR30B	hsa-mir-30b	chr8	-	5p	134800551	COSN23017168	seed_3p	3	NA	NA	C	T	235.995	394.438	0.598307	-0.741042	2.14736e-113	1.46236e-110	-0.782456	0.433947	0.362563	NO
TCGA-AA-3864-01A-01T-1021-13	COAD	MIR33A	hsa-mir-33a	chr22	+	5p	41901029	NA	flanking-3	NA	NA	19	C	T	15.1648	25.5434	0.593689	-0.752221	2.03349e-43	1.3848e-40	-0.746119	0.455596	0.341421	NO
TCGA-AX-A2HJ-01A-11R-A17A-13	UCEC	MIR130A	hsa-mir-130a	chr11	+	3p	57641278	NA	flanking-3	NA	NA	5	C	T	89.1995	150.438	0.592933	-0.754059	1.88646e-47	1.28468e-44	-0.703	0.482056	0.316903	NO
TCGA-XD-AAUG-01A-61R-A41G-13	PAAD	MIR27A	hsa-mir-27a	chr19	-	3p	13836478	NA	loop	NA	9	NA	T	C	951.322	1607.81	0.59169	-0.757087	2.7022e-40	1.8402e-37	-1.45641	0.145279	0.837798	NO
TCGA-AC-A3TN-01A-11R-A22I-13	BRCA	MIR508	hsa-mir-508	chrX	-	3p	147236930	NA	flanking-3	NA	NA	15	C	T	3.94013	6.66011	0.591602	-0.757301	3.16442e-59	2.15497e-56	-0.527889	0.597576	0.223607	NO
TCGA-A4-A5Y0-01A-11R-A31S-13	KIRP	MIR3065	hsa-mir-3065	chr17	+	5p	81125863	NA	flanking-5	NA	NA	-23	C	G	10.2923	17.438	0.590223	-0.760669	8.98228e-16	6.11693e-13	-0.519671	0.603293	0.219472	NO
TCGA-L7-A6VZ-01A-12R-A337-13	ESCA	MIR10B	hsa-mir-10b	chr2	+	5p	176150413	NA	flanking-3	NA	NA	24	C	T	8058.79	13693.7	0.588505	-0.764873	4.22959e-29	2.88035e-26	-0.99854	0.318018	0.497549	NO
TCGA-BT-A3PH-01A-11R-A222-13	BLCA	MIR29A	hsa-mir-29a	chr7	-	3p	130876827	NA	flanking-5	NA	NA	-20	G	C	3545.38	6039.99	0.586984	-0.768607	2.12788e-55	1.44908e-52	-0.914771	0.360312	0.443322	NO
TCGA-B5-A11L-01B-21R-A13R-13	UCEC	MIR374B	hsa-mir-374b	chrX	-	5p	74218537	NA	flanking-3	NA	NA	20	C	T	48.5313	83.0834	0.584128	-0.775644	1.55224e-103	1.05708e-100	-1.20379	0.228669	0.640793	NO
TCGA-D1-A0ZS-01A-11R-A119-13	UCEC	MIRLET7D	hsa-let-7d	chr9	+	5p	94178817	NA	flanking-5	NA	NA	-24	G	GA	499.45	859.314	0.58122	-0.782843	0.0981606	1	-1.17533	0.239995	0.619798	NO
TCGA-BK-A13B-01A-51R-A22I-13	UCEC	MIRLET7D	hsa-let-7d	chr9	+	5p	94178817	NA	flanking-5	NA	NA	-24	G	GA	499.45	859.314	0.58122	-0.782843	0.0981606	1	-1.17533	0.239995	0.619798	NO
TCGA-MI-A75C-01A-11R-A32J-13	LIHC	MIR186	hsa-mir-186	chr1	-	5p	71067697	COSN16303119	seed_5p	6	NA	NA	T	A	165.538	284.883	0.581073	-0.783208	3.36264e-78	2.28996e-75	-1.26117	0.207249	0.683507	NO
TCGA-FJ-A3ZE-01A-11R-A23I-13	BLCA	MIR520B	hsa-mir-520b	chr19	+	5p	53701221	NA	flanking-5	NA	NA	-7	C	G	1.15501	1.98785	0.581034	-0.783307	1.29495e-20	8.81859e-18	-0.489499	0.624488	0.204476	NO
TCGA-56-7730-01A-11H-2124-13	LUSC	MIR519B	hsa-mir-519b	chr19	+	both	53695208	NA	flanking-5	NA	NA	-17	G	T	2.03467	3.50555	0.580413	-0.784849	3.42405e-20	2.33178e-17	-0.447897	0.654227	0.184271	NO
TCGA-PG-A7D5-01A-11R-A34O-13	UCEC	MIR431	hsa-mir-431	chr14	+	3p	100881003	NA	flanking-5	NA	NA	-23	G	A	3.92122	6.75633	0.580377	-0.784938	9.99673e-32	6.80778e-29	-0.54844	0.58339	0.234041	NO
TCGA-DK-A1A3-01A-11R-A13X-13	BLCA	MIR155	hsa-mir-155	chr21	+	5p	25574025	COSN2376761	seed_3p	4	NA	NA	C	T	241.569	417.351	0.578814	-0.788827	1.62731e-34	1.1082e-31	-0.670511	0.502532	0.298836	NO
TCGA-ZB-A966-01A-11R-A42U-13	THYM	MIR15A	hsa-mir-15a	chr13	-	5p	50049206	NA	flanking-5	NA	NA	-18	AT	A	410.83	711.937	0.57706	-0.793206	7.21448e-17	4.91306e-14	-0.875783	0.381148	0.418907	NO
TCGA-MU-A51Y-01A-11R-A26X-13	CESC	MIR505	hsa-mir-505	chrX	-	3p	139924159	COSN16129878	flanking-3	23	NA	NA	G	A	19.9589	34.5973	0.576892	-0.793627	5.61848e-56	3.82618e-53	-1.12659	0.259917	0.585165	NO
TCGA-22-4613-01A-01T-1442-13	LUSC	MIR134	hsa-mir-134	chr14	+	5p	101054684	NA	flanking-5	NA	NA	-10	G	A	171.823	297.872	0.576834	-0.793772	5.99558e-38	4.08299e-35	-0.655162	0.512364	0.290422	NO
TCGA-EB-A431-01A-11R-A25Z-13	SKCM	MIR518F	hsa-mir-518f	chr19	+	both	53700062	COSN1082501	loop	NA	11	NA	G	T	1.26415	2.19618	0.575611	-0.796834	3.01085e-15	2.05039e-12	-0.386383	0.699213	0.155391	NO
TCGA-G4-6628-01A-11H-1838-13	COAD	MIR100	hsa-mir-100	chr11	-	5p	122152215	NA	flanking-3	NA	NA	25	G	T	2233.19	3879.93	0.575574	-0.796928	7.96647e-53	5.42516e-50	-0.847507	0.396712	0.401524	NO
TCGA-ER-A194-01A-11R-A18X-13	SKCM	MIR520A	hsa-mir-520a	chr19	+	both	53690943	COSN5028197	non-seed duplex_3p	11	NA	NA	C	T	1.22211	2.13513	0.57238	-0.804954	1.63973e-16	1.11665e-13	-0.409079	0.682482	0.165909	NO
TCGA-AX-A3FT-01A-11R-A22I-13	UCEC	MIR139	hsa-mir-139	chr11	-	5p	72615044	NA	flanking-3	NA	NA	22	G	A	9.90454	17.4761	0.566747	-0.819223	2.63106e-61	1.79175e-58	-0.828416	0.407435	0.389942	NO
TCGA-AB-2935-03A-01T-0740-13	LAML	MIR27A	hsa-mir-27a	chr19	-	3p	13836478	NA	loop	NA	9	NA	T	C	1548.54	2732.62	0.566687	-0.819376	0.121351	1	-1.11171	0.266568	0.574192	NO
TCGA-AB-2840-03A-01T-0734-13	LAML	MIR27A	hsa-mir-27a	chr19	-	3p	13836478	NA	loop	NA	9	NA	T	C	1548.54	2732.62	0.566687	-0.819376	0.121351	1	-1.11171	0.266568	0.574192	NO
TCGA-XF-A9T8-01A-11R-A39B-13	BLCA	MIR144	hsa-mir-144	chr17	-	both	28861531	NA	flanking-3	NA	NA	17	C	A	28.3143	49.992	0.566378	-0.820163	3.26484e-23	2.22336e-20	-0.525139	0.599486	0.222221	NO
TCGA-G4-6586-01A-11H-1773-13	COAD	MIR148A	hsa-mir-148a	chr7	-	3p	25949904	NA	flanking-3	NA	NA	18	C	T	29575.5	52467.1	0.563696	-0.827012	1.38725e-81	9.44717e-79	-1.15422	0.24841	0.604832	NO
TCGA-D3-A1Q4-06A-11R-A18W-13	SKCM	MIR522	hsa-mir-522	chr19	+	3p	53751225	COSN23022570	flanking-5	NA	NA	-1	C	T	4.15179	7.38301	0.562344	-0.830476	1.39916e-09	9.52827e-07	-0.293607	0.769058	0.114041	NO
TCGA-A2-A0CR-01A-11R-A22I-13	BRCA	MIR23B	hsa-mir-23b	chr9	+	3p	95085309	NA	flanking-3	NA	NA	22	C	T	408.823	729.4	0.560492	-0.835234	2.17528e-197	1.48137e-194	-1.14521	0.25212	0.598392	NO
TCGA-22-5473-01A-01T-1634-13	LUSC	MIR361	hsa-mir-361	chrX	-	5p	85903692	COSN2378982	non-seed duplex_5p	11	NA	NA	G	A	280.842	503.762	0.557489	-0.842985	8.4844e-168	5.77787e-165	-2.04182	0.041169	1.38543	NO
TCGA-AP-A0LP-01A-12R-A103-13	UCEC	MIR409	hsa-mir-409	chr14	+	both	101065343	COSN2381577	loop	NA	7	NA	G	A	10.0281	18.0859	0.554471	-0.850815	2.90942e-48	1.98131e-45	-0.709745	0.477862	0.320697	NO
TCGA-5M-AAT6-01A-11H-A41D-13	COAD	MIR532	hsa-mir-532	chrX	+	5p	50003232	NA	flanking-3	NA	NA	7	C	T	838.062	1528.22	0.548392	-0.866722	8.31372e-84	5.66164e-81	-1.17813	0.238745	0.622065	NO
TCGA-64-5781-01A-01T-1627-13	LUAD	MIR30D	hsa-mir-30d	chr8	-	5p	134804916	COSN24409198	loop	NA	3	NA	C	A	6330.28	11601.8	0.545628	-0.87401	1.61774e-73	1.10168e-70	-0.954064	0.340051	0.468456	NO
TCGA-B5-A11H-01A-11R-A119-13	UCEC	MIR508	hsa-mir-508	chrX	-	3p	147237007	COSN1085051	flanking-5	NA	NA	-5	A	G	8.13621	15.1815	0.535929	-0.899885	5.85712e-27	3.9887e-24	-0.497638	0.618739	0.208492	NO
TCGA-LN-A7HY-01A-12R-A353-13	ESCA	MIR744	hsa-mir-744	chr17	+	5p	12081958	NA	loop	NA	28	NA	C	T	15.7584	29.4186	0.535662	-0.900606	2.36542e-32	1.61085e-29	-1.08506	0.277896	0.556117	NO
TCGA-BG-A187-01A-11R-A12H-13	UCEC	MIR224	hsa-mir-224	chrX	-	5p	151958598	COSN4710444	non-seed duplex_3p	9	NA	NA	C	A	8.99372	16.8783	0.532858	-0.908178	1.77161e-39	1.20647e-36	-0.626258	0.531146	0.274786	NO
TCGA-DK-A1AB-01A-11R-A13X-13	BLCA	MIR197	hsa-mir-197	chr1	+	3p	109598984	NA	flanking-3	NA	NA	23	C	T	153.79	289.429	0.531355	-0.912252	5.35888e-56	3.64939e-53	-0.921594	0.35674	0.447648	NO
TCGA-D7-6518-01A-11R-1802-13	STAD	MIR379	hsa-mir-379	chr14	+	5p	101022093	COSN7428815	loop	NA	2	NA	G	A	283.573	534.284	0.530753	-0.913888	4.09997e-78	2.79208e-75	-1.14034	0.254146	0.594917	NO
TCGA-A4-A5Y0-01A-11R-A31S-13	KIRP	MIR338	hsa-mir-338	chr17	-	both	81125863	NA	flanking-3	NA	NA	24	C	G	48.1523	90.8353	0.530106	-0.915648	1.51383e-36	1.03092e-33	-0.896494	0.369989	0.431811	NO
TCGA-D1-A16Y-01A-31R-A12H-13	UCEC	MIR1307	hsa-mir-1307	chr10	-	both	103394308	COSN1079925	non-seed duplex_3p	15	NA	NA	G	A	1221.85	2319.7	0.526726	-0.924874	1.10336e-93	7.51386e-91	-1.11593	0.264451	0.577656	NO
TCGA-D7-A6EY-01A-21R-A31Q-13	STAD	MIR455	hsa-mir-455	chr9	+	both	114209428	NA	flanking-5	NA	NA	-21	C	T	94.7411	180.37	0.525259	-0.928898	1.17394e-34	7.99456e-32	-0.654993	0.512473	0.290329	NO
TCGA-HF-A5NB-01A-11R-A31Q-13	STAD	MIR382	hsa-mir-382	chr14	+	5p	101054344	NA	loop	NA	7	NA	T	G	9.24645	17.6567	0.523679	-0.933244	1.95669e-73	1.3325e-70	-1.08888	0.276206	0.558767	NO
TCGA-UY-A9PD-01A-11R-A38M-13	BLCA	MIR205	hsa-mir-205	chr1	+	5p	209432162	NA	flanking-5	NA	NA	-4	C	T	923.428	1772.89	0.520861	-0.941029	1.74068e-17	1.1854e-14	-0.443432	0.657453	0.182135	NO
TCGA-EE-A3J5-06A-11R-A20E-13	SKCM	MIR182	hsa-mir-182	chr7	-	5p	129770412	COSN5029509	non-seed duplex_3p	15	NA	NA	G	A	664.584	1279.11	0.519567	-0.944617	1.05444e-27	7.18071e-25	-0.551277	0.581444	0.235492	NO
TCGA-D5-6928-01A-11H-1927-13	COAD	MIR758	hsa-mir-758	chr14	+	both	101026018	NA	flanking-5	NA	NA	-16	G	A	11.9508	23.1095	0.517137	-0.951381	5.27435e-92	3.59183e-89	-1.26937	0.20431	0.68971	NO
TCGA-B5-A11Y-01A-21R-A10I-13	UCEC	MIR1306	hsa-mir-1306	chr22	+	both	20086088	COSM1032175	non-seed duplex_5p	17	NA	NA	C	T	9.74088	19.0215	0.512099	-0.965506	1.15608e-110	7.8729e-108	-1.26621	0.205439	0.687316	NO
TCGA-CM-4746-01A-01T-1409-13	COAD	MIR708	hsa-mir-708	chr11	-	5p	79402074	COSN23012351	loop	NA	3	NA	AC	A	25.2294	49.3925	0.510794	-0.969187	2.31631e-86	1.57741e-83	-1.20784	0.227111	0.643763	NO
TCGA-YG-AA3N-01A-11R-A38N-13	SKCM	MIR382	hsa-mir-382	chr14	+	5p	101054351	COSN1080985	loop	NA	14	NA	G	A	7.16708	14.0763	0.50916	-0.973809	0.411419	1	-0.582419	0.560567	0.251372	NO
TCGA-D3-A51G-06A-11R-A25Z-13	SKCM	MIR382	hsa-mir-382	chr14	+	5p	101054351	COSN1080985	loop	NA	14	NA	G	A	7.16708	14.0763	0.50916	-0.973809	0.411419	1	-0.582419	0.560567	0.251372	NO
TCGA-A3-3387-01A-01R-1540-13	KIRC	MIR192	hsa-mir-192	chr11	-	5p	64891164	COSN2377058	non-seed duplex_3p	17	NA	NA	A	G	2880.34	5673.17	0.507713	-0.977916	6.8518e-33	4.66608e-30	-0.575774	0.564768	0.24813	NO
TCGA-O2-A52Q-01A-11H-A26V-13	LUSC	MIR328	hsa-mir-328	chr16	-	3p	67202402	NA	flanking-5	NA	NA	-13	G	C	27.2986	53.7915	0.507489	-0.978551	6.50921e-105	4.43277e-102	-1.32872	0.183939	0.735326	NO
TCGA-FR-A3YO-06A-11R-A23A-13	SKCM	MIR500A	hsa-mir-500a	chrX	+	3p	50008523	NA	flanking-3	NA	NA	20	C	T	760.018	1503.6	0.505464	-0.98432	7.33846e-71	4.99749e-68	-1.01511	0.310053	0.508564	NO
TCGA-CD-8536-01A-11R-2343-13	STAD	MIR328	hsa-mir-328	chr16	-	3p	67202382	COSN23014987	seed_5p	8	NA	NA	G	GC	10.2522	20.3157	0.504643	-0.986666	0.0598948	1	-1.33617	0.181549	0.741006	NO
TCGA-BR-A4QL-01A-31R-A252-13	STAD	MIR328	hsa-mir-328	chr16	-	3p	67202382	COSN23014987	seed_5p	8	NA	NA	G	GC	10.2522	20.3157	0.504643	-0.986666	0.0598948	1	-1.33617	0.181549	0.741006	NO
TCGA-DA-A3F8-06A-11R-A20E-13	SKCM	MIR887	hsa-mir-887	chr5	+	3p	15935172	NA	flanking-5	NA	NA	-19	G	A	8.71759	17.3583	0.502214	-0.993626	4.28891e-29	2.92075e-26	-0.570097	0.568612	0.245184	NO
TCGA-BA-4076-01A-01T-1435-13	HNSC	MIR30A	hsa-mir-30a	chr6	-	5p	71403620	NA	flanking-5	NA	NA	-4	G	C	3461.65	6893.18	0.502184	-0.993711	1.55695e-81	1.06028e-78	-1.01401	0.310577	0.50783	NO
TCGA-D1-A16Y-01A-31R-A12H-13	UCEC	MIR363	hsa-mir-363	chrX	-	3p	134169434	COSN1085005	non-seed duplex_5p	13	NA	NA	C	T	14.0717	28.144	0.499989	-1.00003	8.94608e-31	6.09228e-28	-0.539096	0.58982	0.22928	NO
TCGA-66-2791-01A-01T-0981-13	LUSC	MIR15B	hsa-mir-15b	chr3	+	5p	160404673	NA	flanking-3	NA	NA	7	T	C	153.062	306.214	0.499855	-1.00042	4.69562e-117	3.19772e-114	-1.4554	0.145559	0.836962	NO
TCGA-D1-A15X-01A-11R-A119-13	UCEC	MIR320A	hsa-mir-320a	chr8	-	3p	22244960	NA	flanking-3	NA	NA	15	T	C	503.312	1022.76	0.492111	-1.02295	6.15334e-110	4.19043e-107	-1.25964	0.2078	0.682354	NO
TCGA-CG-5717-01A-11R-1602-13	STAD	MIR328	hsa-mir-328	chr16	-	3p	67202362	NA	loop	NA	5	NA	T	G	9.88134	20.3157	0.48639	-1.03982	1.25449e-101	8.54309e-99	-1.40814	0.159089	0.798361	NO
TCGA-HF-A5NB-01A-11R-A31Q-13	STAD	MIR10B	hsa-mir-10b	chr2	+	5p	176150413	NA	flanking-3	NA	NA	24	C	T	5569.99	11474.1	0.48544	-1.04263	3.70925e-100	2.526e-97	-1.38302	0.166658	0.778173	NO
TCGA-B6-A0IJ-01A-11R-A035-13	BRCA	MIR664A	hsa-mir-664a	chr1	-	both	220200593	COSN23014234	non-seed duplex_5p	17	NA	NA	C	A	19.2397	40.0946	0.479857	-1.05932	4.95923e-259	3.37724e-256	-1.4183	0.156103	0.806589	NO
TCGA-ZF-A9RC-01A-11R-A38M-13	BLCA	MIR328	hsa-mir-328	chr16	-	3p	67202402	NA	flanking-5	NA	NA	-13	G	C	14.4907	30.2143	0.479598	-1.0601	2.59011e-77	1.76386e-74	-1.16447	0.244233	0.612196	NO
TCGA-D5-6931-01A-11H-1927-13	COAD	MIR654	hsa-mir-654	chr14	+	3p	101040262	COSN15625305	loop	NA	7	NA	C	T	19.3141	40.3364	0.478827	-1.06242	9.57248e-106	6.51886e-103	-1.41972	0.15569	0.80774	NO
TCGA-WE-AAA3-06A-11R-A38N-13	SKCM	MIR455	hsa-mir-455	chr9	+	both	114209435	NA	flanking-5	NA	NA	-14	C	T	136.805	287.175	0.476381	-1.06981	5.67727e-50	3.86622e-47	-0.798057	0.424837	0.371777	NO
TCGA-GU-A767-01A-11R-A32J-13	BLCA	MIR526B	hsa-mir-526b	chr19	+	3p	53694397	NA	flanking-5	NA	NA	-9	G	T	1.26742	2.66901	0.474866	-1.07441	8.24586e-26	5.61543e-23	-0.560108	0.575406	0.240026	NO
TCGA-CN-6013-01A-11R-1685-13	HNSC	MIR758	hsa-mir-758	chr14	+	both	101026095	NA	flanking-3	NA	NA	3	C	T	8.96139	18.891	0.474374	-1.0759	6.43678e-77	4.38344e-74	-0.97172	0.33119	0.479923	NO
TCGA-BC-A5W4-01A-11R-A28Z-13	LIHC	MIR629	hsa-mir-629	chr15	-	5p	70079371	NA	flanking-3	NA	NA	16	C	A	31.3435	66.7057	0.469877	-1.08964	4.65442e-46	3.16966e-43	-0.858997	0.390342	0.408554	NO
TCGA-TQ-A7RR-01A-21R-A34G-13	LGG	MIR1251	hsa-mir-1251	chr12	+	5p	97491936	NA	loop	NA	3	NA	T	C	3.76741	8.04845	0.468091	-1.09514	9.03729e-79	6.1544e-76	-0.977783	0.328182	0.483886	NO
TCGA-BG-A0VZ-01A-11R-A108-13	UCEC	MIR100	hsa-mir-100	chr11	-	5p	122152265	COSN2381375	loop	NA	10	NA	G	T	1232.9	2638.49	0.467274	-1.09766	1.9528e-58	1.32986e-55	-0.803643	0.421603	0.375096	NO
TCGA-HP-A5N0-01A-11R-A28Z-13	LIHC	MIR1295B	hsa-mir-1295b	chr1	+	3p	171101808	NA	flanking-3	NA	NA	10	T	G	5.44146	11.6553	0.466864	-1.09893	1.02726e-35	6.99566e-33	-0.725087	0.468399	0.329384	NO
TCGA-AN-A0XW-01A-11R-A108-13	BRCA	MIR522	hsa-mir-522	chr19	+	3p	53751294	NA	flanking-3	NA	NA	9	G	C	1.421	3.06162	0.464135	-1.10738	3.89591e-100	2.65311e-97	-0.724131	0.468985	0.328841	NO
TCGA-61-1741-01A-02R-1567-13	OV	MIR382	hsa-mir-382	chr14	+	5p	101054295	NA	flanking-5	NA	NA	-21	C	A	8.59596	18.5731	0.462818	-1.11148	5.43588e-62	3.70184e-59	-0.872993	0.382667	0.417179	NO
TCGA-60-2703-01A-11H-2044-13	LUSC	MIR522	hsa-mir-522	chr19	+	3p	53751206	NA	flanking-5	NA	NA	-20	G	A	1.66157	3.63471	0.457141	-1.12929	1.84159e-36	1.25413e-33	-0.640717	0.521707	0.282574	NO
TCGA-D1-A0ZS-01A-11R-A119-13	UCEC	MIR1307	hsa-mir-1307	chr10	-	both	103394290	NA	flanking-3	NA	NA	11	C	T	1057.91	2318.81	0.456232	-1.13216	2.32774e-121	1.58519e-118	-1.36608	0.171913	0.764692	NO
TCGA-ED-A459-01A-11R-A25Z-13	LIHC	MIR708	hsa-mir-708	chr11	-	5p	79402092	COSN16303180	seed_5p	8	NA	NA	A	G	3.04754	6.70567	0.454472	-1.13774	7.36339e-33	5.01447e-30	-0.688565	0.491097	0.308833	NO
TCGA-VQ-A924-01A-11R-A415-13	STAD	MIR106B	hsa-mir-106b	chr7	-	5p	100094026	NA	loop	NA	17	NA	G	A	260.79	576.949	0.452016	-1.14555	9.90299e-89	6.74393e-86	-1.25609	0.209083	0.679681	NO
TCGA-B5-A11N-01A-11R-A119-13	UCEC	MIR424	hsa-mir-424	chrX	-	5p	134546636	NA	flanking-3	NA	NA	8	G	A	86.175	191.182	0.450747	-1.14961	5.09269e-79	3.46812e-76	-0.986418	0.323928	0.489551	NO
TCGA-BR-4256-01A-01R-1131-13	STAD	MIR95	hsa-mir-95	chr4	-	3p	8005340	COSN1083635	loop	NA	7	NA	G	A	3.29637	7.40426	0.445199	-1.16748	4.87154e-59	3.31752e-56	-0.92845	0.353174	0.452011	NO
TCGA-KQ-A41R-01A-21R-A358-13	BLCA	MIR134	hsa-mir-134	chr14	+	5p	101054719	NA	loop	NA	4	NA	G	A	109.82	246.836	0.444911	-1.16841	1.43187e-69	9.75103e-67	-1.0759	0.281974	0.549791	NO
TCGA-EB-A5UN-06A-11R-A310-13	SKCM	MIR4746	hsa-mir-4746	chr19	+	5p	4445976	NA	flanking-5	NA	NA	-11	G	A	4.42204	9.98696	0.442782	-1.17533	2.45702e-96	1.67323e-93	-1.2776	0.201389	0.695964	NO
TCGA-E9-A54X-01A-11R-A25Z-13	BRCA	MIR508	hsa-mir-508	chrX	-	3p	147236982	COSN23017582	non-seed duplex_5p	21	NA	NA	T	C	2.94042	6.66014	0.441495	-1.17953	2.47617e-122	1.68627e-119	-0.822207	0.410959	0.386201	NO
TCGA-90-7769-01A-11H-2124-13	LUSC	MIR431	hsa-mir-431	chr14	+	3p	100881096	NA	flanking-3	NA	NA	6	G	T	4.36197	9.89083	0.441011	-1.18111	8.79103e-51	5.98669e-48	-0.78883	0.430212	0.366318	NO
TCGA-99-7458-01A-11H-2038-13	LUAD	MIR20B	hsa-mir-20b	chrX	-	5p	134169852	COSN24411804	non-seed duplex_5p	21	NA	NA	A	T	5.33916	12.2928	0.434332	-1.20313	4.23243e-56	2.88229e-53	-0.795092	0.42656	0.37002	NO
TCGA-AA-A01R-01A-21R-A082-13	COAD	MIR139	hsa-mir-139	chr11	-	5p	72615081	COSN18246415	seed_3p	8	NA	NA	C	T	22.8679	52.718	0.433777	-1.20497	5.61422e-126	3.82329e-123	-1.65878	0.0971591	1.01252	NO
TCGA-QG-A5Z1-01A-11H-A28I-13	COAD	MIR130B	hsa-mir-130b	chr22	+	3p	21653344	NA	loop	NA	8	NA	C	T	16.1167	37.459	0.430248	-1.21676	5.72818e-134	3.90089e-131	-1.75277	0.0796418	1.09886	NO
TCGA-AX-A3FT-01A-11R-A22I-13	UCEC	MIR148B	hsa-mir-148b	chr12	+	3p	54337228	NA	flanking-5	NA	NA	-12	G	T	221.887	518.451	0.427981	-1.22438	1.311e-180	8.9279e-178	-1.95479	0.050608	1.29578	NO
TCGA-D8-A142-01A-11R-A114-13	BRCA	MIR342	hsa-mir-342	chr14	+	3p	100109710	COSN23014460	loop	NA	17	NA	A	G	139.247	328.46	0.42394	-1.23807	8.95181e-195	6.09619e-192	-1.13468	0.25651	0.590895	NO
TCGA-66-2789-01A-01T-0981-13	LUSC	MIR889	hsa-mir-889	chr14	+	3p	101047898	NA	flanking-5	NA	NA	-13	T	C	5.89365	13.9569	0.422274	-1.24375	6.22517e-75	4.23934e-72	-1.0279	0.303999	0.517128	NO
TCGA-AJ-A2QO-01A-11R-A18L-13	UCEC	MIR542	hsa-mir-542	chrX	-	3p	134541389	NA	loop	NA	11	NA	G	A	82.3551	196.395	0.419335	-1.25382	1.03568e-103	7.053e-101	-1.20362	0.228736	0.640666	NO
TCGA-66-2795-01A-02T-0981-13	LUSC	MIR320A	hsa-mir-320a	chr8	-	3p	22244987	COSN2378943	non-seed duplex_3p	10	NA	NA	C	T	221.985	534.103	0.415622	-1.26665	6.47605e-154	4.41019e-151	-1.87199	0.0612081	1.21319	NO
TCGA-YG-AA3O-06A-11R-A38N-13	SKCM	MIR196B	hsa-mir-196b	chr7	-	5p	27169565	NA	flanking-5	NA	NA	-16	C	T	116.453	280.205	0.415599	-1.26674	7.14188e-40	4.86362e-37	-0.691081	0.489515	0.310234	NO
TCGA-AX-A3FS-01A-11R-A22I-13	UCEC	MIR136	hsa-mir-136	chr14	+	both	100884745	COSM469664	loop	NA	7	NA	T	C	8.16315	19.6487	0.415455	-1.26724	1.54285e-77	1.05068e-74	-0.972083	0.331009	0.48016	NO
TCGA-D1-A16Y-01A-31R-A12H-13	UCEC	MIR204	hsa-mir-204	chr9	-	5p	70810072	NA	flanking-5	NA	NA	-20	A	C	6.8609	16.5957	0.413415	-1.27434	7.29089e-45	4.9651e-42	-0.677896	0.497837	0.302912	NO
TCGA-A2-A0SU-01A-11R-A085-13	BRCA	MIR15B	hsa-mir-15b	chr3	+	5p	160404598	NA	flanking-5	NA	NA	-9	A	T	83.0916	201.046	0.413296	-1.27475	2.80255e-250	1.90854e-247	-1.3786	0.168018	0.774644	NO
TCGA-AQ-A0Y5-01A-11R-A14L-13	BRCA	MIRLET7G	hsa-let-7g	chr3	-	5p	52268316	COSN23016349	loop	NA	20	NA	G	C	218.768	530.803	0.412146	-1.27877	0	0	-2.10427	0.0353547	1.45155	NO
TCGA-AD-6889-01A-11H-1927-13	COAD	MIR30A	hsa-mir-30a	chr6	-	5p	71403531	NA	flanking-3	NA	NA	23	C	A	2866.63	7004.88	0.409234	-1.289	7.07786e-180	4.82002e-177	-2.38716	0.0169793	1.77008	NO
TCGA-DX-A48J-01A-21R-A30J-13	SARC	MIR200A	hsa-mir-200a	chr1	+	3p	1167869	NA	flanking-5	NA	NA	-9	C	T	1.27254	3.15735	0.403041	-1.311	3.23213e-28	2.20108e-25	-0.776174	0.437646	0.358877	NO
TCGA-EE-A29M-06A-11R-A18W-13	SKCM	MIR127	hsa-mir-127	chr14	+	3p	100883030	COSM3493807	loop	NA	8	NA	G	A	179.067	445.467	0.401977	-1.31482	2.20113e-45	1.49897e-42	-0.751649	0.452262	0.34461	NO
TCGA-96-8170-01A-11H-2295-13	LUSC	MIR518E	hsa-mir-518e	chr19	+	5p	53729858	COSN2378632	seed_5p	6	NA	NA	G	T	1.42796	3.56084	0.401019	-1.31826	0.291163	1	-0.748103	0.45446	0.342504	NO
TCGA-34-2608-01A-02T-1557-13	LUSC	MIR518E	hsa-mir-518e	chr19	+	5p	53729858	COSN2378632	seed_5p	6	NA	NA	G	T	1.42796	3.56084	0.401019	-1.31826	0.291163	1	-0.748103	0.45446	0.342504	NO
TCGA-DA-A1HW-06A-11R-A18X-13	SKCM	MIR136	hsa-mir-136	chr14	+	both	100884710	COSM1707888	flanking-5	NA	NA	-6	C	T	2.60997	6.54327	0.398878	-1.32598	1.32787e-59	9.04282e-57	-0.90204	0.367035	0.435292	NO
TCGA-NC-A5HD-01A-11H-A26V-13	LUSC	MIR522	hsa-mir-522	chr19	+	3p	53751213	NA	flanking-5	NA	NA	-13	TC	T	1.44938	3.63471	0.398762	-1.3264	4.91685e-47	3.34837e-44	-0.752551	0.45172	0.345131	NO
TCGA-AO-A128-01A-11R-A10I-13	BRCA	MIR454	hsa-mir-454	chr17	-	3p	59137873	NA	flanking-5	NA	NA	-24	AT	A	3.49857	9.1195	0.383636	-1.38219	3.43475e-288	2.33906e-285	-1.55344	0.120319	0.919667	NO
TCGA-IH-A3EA-01A-11R-A20E-13	SKCM	MIR331	hsa-mir-331	chr12	+	3p	95308505	NA	flanking-3	NA	NA	5	C	T	12.9256	34.0303	0.379828	-1.39658	1.13439e-144	7.72518e-142	-1.82674	0.0677389	1.16916	NO
TCGA-ER-A199-06A-11R-A18W-13	SKCM	MIR526B	hsa-mir-526b	chr19	+	3p	53694438	NA	loop	NA	10	NA	G	A	1.22921	3.26093	0.37695	-1.40755	1.07125e-30	7.2952e-28	-0.589053	0.555826	0.255061	NO
TCGA-AA-3833-01A-01T-0906-13	COAD	MIR500A	hsa-mir-500a	chrX	+	3p	50008509	NA	flanking-3	NA	NA	6	G	A	163.318	436.969	0.373753	-1.41984	3.46304e-135	2.35833e-132	-1.76787	0.0770824	1.11304	NO
TCGA-09-2051-01A-01R-1568-13	OV	MIR758	hsa-mir-758	chr14	+	both	101026111	NA	flanking-3	NA	NA	19	C	A	4.76051	12.7491	0.373398	-1.42121	3.81064e-80	2.59505e-77	-1.04449	0.29626	0.528328	NO
TCGA-78-7167-01A-11H-2065-13	LUAD	MIR425	hsa-mir-425	chr3	-	5p	49020134	NA	flanking-3	NA	NA	25	T	A	70.201	189.337	0.370772	-1.4314	4.62532e-160	3.14984e-157	-1.78324	0.0745468	1.12757	NO
TCGA-GN-A4U8-06A-11R-A360-13	SKCM	MIR379	hsa-mir-379	chr14	+	5p	101022061	NA	flanking-5	NA	NA	-10	C	T	132.757	361.048	0.367698	-1.44341	1.22108e-49	8.31556e-47	-0.79795	0.4249	0.371714	NO
TCGA-DQ-5624-01A-01R-1872-13	HNSC	MIR320A	hsa-mir-320a	chr8	-	3p	22244987	COSN2378943	non-seed duplex_3p	10	NA	NA	C	T	252.549	688.506	0.366807	-1.44691	4.59035e-182	3.12603e-179	-1.98586	0.0470485	1.32745	NO
TCGA-NC-A5HQ-01A-11H-A26V-13	LUSC	MIR519B	hsa-mir-519b	chr19	+	both	53695212	NA	flanking-5	NA	NA	-13	C	T	1.26534	3.50555	0.360953	-1.47012	1.23775e-55	8.42909e-53	-0.838964	0.401489	0.396326	NO
TCGA-24-1104-01A-01R-1565-13	OV	MIR20A	hsa-mir-20a	chr13	+	5p	91351097	NA	loop	NA	3	NA	T	C	14.9246	41.489	0.359724	-1.47504	6.37545e-114	4.34168e-111	-1.36956	0.170824	0.767452	NO
TCGA-B5-A11U-01A-11R-A119-13	UCEC	MIR1247	hsa-mir-1247	chr14	-	5p	101560365	COSN1080972	non-seed duplex_5p	19	NA	NA	G	A	5.95704	16.9777	0.350875	-1.51097	3.06843e-72	2.0896e-69	-0.925413	0.354751	0.450076	NO
TCGA-18-5595-01A-01T-1634-13	LUSC	MIR155	hsa-mir-155	chr21	+	5p	25573966	NA	flanking-5	NA	NA	-17	C	T	178.25	508.465	0.350565	-1.51224	3.4633e-136	2.35851e-133	-1.66362	0.096189	1.01687	NO
TCGA-HD-A6I0-01A-11R-A31R-13	HNSC	MIR6510	hsa-mir-6510	chr17	-	3p	41517239	NA	flanking-5	NA	NA	-24	A	C	4.0948	12.0822	0.338913	-1.56101	2.59206e-64	1.76519e-61	-0.860604	0.389456	0.409541	NO
TCGA-GN-A9SD-06A-11R-A404-13	SKCM	MIR381	hsa-mir-381	chr14	+	3p	101045965	NA	loop	NA	17	NA	G	A	6.32962	18.7256	0.338019	-1.56482	3.36675e-66	2.29276e-63	-0.973206	0.330451	0.480893	NO
TCGA-LP-A7HU-01A-11R-A342-13	CESC	MIR1307	hsa-mir-1307	chr10	-	both	103394297	COSN16128613	flanking-3	NA	NA	4	C	T	473.577	1421.78	0.333088	-1.58603	9.5941e-110	6.53358e-107	-2.03163	0.0421912	1.37478	NO
TCGA-K1-A3PO-01A-11R-A21U-13	SARC	MIR365A	hsa-mir-365a	chr16	+	3p	14309384	NA	flanking-3	NA	NA	23	G	T	13.2282	40.1068	0.329823	-1.60023	6.90052e-70	4.69925e-67	-1.53909	0.123781	0.907344	NO
TCGA-43-6143-01A-11H-1819-13	LUSC	MIR410	hsa-mir-410	chr14	+	3p	101065997	NA	flanking-3	NA	NA	16	C	G	3.41011	10.367	0.328938	-1.60411	2.43713e-90	1.65968e-87	-1.18093	0.237631	0.624096	NO
TCGA-EE-A17X-06A-11R-A18V-13	SKCM	MIR197	hsa-mir-197	chr1	+	3p	109598948	COSN5026096	non-seed duplex_3p	9	NA	NA	C	A	338.454	1033.85	0.327372	-1.611	2.22098e-157	1.51249e-154	-1.98124	0.0475638	1.32272	NO
TCGA-D3-A2JF-06A-11R-A18V-13	SKCM	MIR205	hsa-mir-205	chr1	+	5p	209432208	COSN5026360	seed_3p	6	NA	NA	C	T	3.92291	11.9936	0.327083	-1.61227	0.537832	1	-0.436475	0.662837	0.178593	NO
TCGA-W3-A825-06A-11R-A358-13	SKCM	MIR205	hsa-mir-205	chr1	+	5p	209432208	COSN5026360	seed_3p	6	NA	NA	C	T	3.92291	11.9936	0.327083	-1.61227	0.537832	1	-0.436475	0.662837	0.178593	NO
TCGA-58-A46M-01A-11H-A24G-13	LUSC	MIR522	hsa-mir-522	chr19	+	3p	53751222	NA	flanking-5	NA	NA	-4	G	T	1.17708	3.63471	0.323845	-1.62662	6.7149e-64	4.57285e-61	-0.922886	0.356067	0.448469	NO
TCGA-EE-A181-06A-11R-A18V-13	SKCM	MIR523	hsa-mir-523	chr19	+	5p	53698432	NA	loop	NA	11	NA	G	A	2.31743	7.2736	0.318608	-1.65014	2.15584e-30	1.46813e-27	-0.584725	0.558732	0.252796	NO
TCGA-VQ-A91K-01A-11R-A415-13	STAD	MIR598	hsa-mir-598	chr8	-	3p	11035291	NA	flanking-5	NA	NA	-12	G	T	6.71781	21.2256	0.316496	-1.65974	7.2138e-107	4.9126e-104	-1.46948	0.141703	0.84862	NO
TCGA-04-1361-01A-01R-1565-13	OV	MIR25	hsa-mir-25	chr7	-	3p	100093637	NA	flanking-5	NA	NA	-7	A	T	5652.31	18042.4	0.313279	-1.67448	4.91745e-200	3.34879e-197	-2.34759	0.0188955	1.72364	NO
TCGA-EE-A183-06A-11R-A18V-13	SKCM	MIR93	hsa-mir-93	chr7	-	5p	100093771	NA	flanking-3	NA	NA	6	G	A	4184.98	13889.7	0.301301	-1.73072	8.02728e-164	5.46657e-161	-2.06451	0.0389698	1.40927	NO
TCGA-BR-8483-01A-31R-2402-13	STAD	MIR10397	hsa-mir-10397	chr5	+	both	10402389	COSM1059332	loop	NA	4	NA	G	A	2.94798	9.82241	0.300128	-1.73635	8.09864e-135	5.51517e-132	-1.80255	0.0714589	1.14594	NO
TCGA-EB-A5UN-06A-11R-A310-13	SKCM	MIR217	hsa-mir-217	chr2	-	5p	55983012	NA	loop	NA	8	NA	G	A	2.60699	8.72438	0.298817	-1.74266	6.36136e-78	4.33209e-75	-1.086	0.277479	0.55677	NO
TCGA-63-A5MU-01A-11H-A26V-13	LUSC	MIR511	hsa-mir-511	chr10	+	3p	17845186	NA	flanking-3	NA	NA	7	G	A	5.43786	18.2433	0.298075	-1.74625	7.57292e-148	5.15716e-145	-1.79672	0.07238	1.14038	NO
TCGA-D9-A3Z4-01A-11R-A23A-13	SKCM	MIR223	hsa-mir-223	chrX	+	3p	66018915	COSM3562771	non-seed duplex_5p	21	NA	NA	T	C	94.3621	320.344	0.294565	-1.76334	3.81906e-78	2.60078e-75	-1.08828	0.276472	0.55835	NO
TCGA-OR-A5J5-01A-11R-A29W-13	ACC	MIR144	hsa-mir-144	chr17	-	both	28861543	NA	flanking-3	NA	NA	5	G	A	30.4424	103.796	0.293292	-1.76959	8.10394e-18	5.51878e-15	-1.26734	0.205033	0.688176	NO
TCGA-A8-A09Z-01A-11R-A010-13	BRCA	MIR409	hsa-mir-409	chr14	+	both	101065342	NA	loop	NA	6	NA	C	T	8.61322	29.4026	0.292941	-1.77132	0	0	-1.89971	0.0574716	1.24055	NO
TCGA-04-1346-01A-01R-1569-13	OV	MIR20B	hsa-mir-20b	chrX	-	5p	134169834	COSN158473	non-seed duplex_3p	1	NA	NA	T	C	2.48277	8.56199	0.289976	-1.78599	3.93543e-81	2.68003e-78	-1.0538	0.291976	0.534653	NO
TCGA-NC-A5HN-01A-11H-A26V-13	LUSC	MIR432	hsa-mir-432	chr14	+	5p	100884569	NA	flanking-3	NA	NA	5	G	A	2.19186	7.59561	0.288569	-1.79301	8.1249e-108	5.53306e-105	-1.36105	0.173498	0.760705	NO
TCGA-AA-3492-01A-01T-1409-13	COAD	MIR362	hsa-mir-362	chrX	+	5p	50008957	NA	flanking-5	NA	NA	-11	TC	T	5.71366	20.0572	0.284868	-1.81163	9.66154e-138	6.57951e-135	-1.79975	0.0719001	1.14327	NO
TCGA-33-4532-01A-01T-1517-13	LUSC	MIR493	hsa-mir-493	chr14	+	both	100869130	COSN2378440	non-seed duplex_3p	15	NA	NA	G	T	4.10402	14.5308	0.282436	-1.824	2.50634e-125	1.70682e-122	-1.54979	0.121193	0.916524	NO
TCGA-AX-A3FS-01A-11R-A22I-13	UCEC	MIR3613	hsa-mir-3613	chr13	-	5p	49996417	NA	flanking-3	NA	NA	9	A	G	5.07191	18.1394	0.279607	-1.83853	3.69968e-196	2.51948e-193	-2.15419	0.0312251	1.5055	NO
TCGA-BA-4078-01A-01T-1435-13	HNSC	MIR519B	hsa-mir-519b	chr19	+	both	53695201	NA	flanking-5	NA	NA	-24	G	A	1.33617	4.79885	0.278435	-1.84459	3.32028e-103	2.26111e-100	-1.20609	0.227782	0.642481	NO
TCGA-67-3771-01A-01T-0947-13	LUAD	MIR508	hsa-mir-508	chrX	-	3p	147237002	COSN24409304	non-seed duplex_5p	1	NA	NA	A	G	3.97159	14.275	0.278219	-1.84571	1.46807e-70	9.99753e-68	-0.929746	0.352503	0.452837	NO
TCGA-37-3783-01A-01T-1517-13	LUSC	MIR217	hsa-mir-217	chr2	-	5p	55983043	COSN2378661	flanking-5	1	NA	NA	T	C	4.56744	16.633	0.274602	-1.86459	1.93353e-118	1.31673e-115	-1.4701	0.141535	0.849136	NO
TCGA-DX-A48J-01A-21R-A30J-13	SARC	MIR106B	hsa-mir-106b	chr7	-	5p	100093982	NA	flanking-3	NA	NA	20	G	A	109.054	401.142	0.271858	-1.87907	1.00326e-101	6.83222e-99	-2.22555	0.0260444	1.58429	NO
TCGA-D8-A1JN-01A-11R-A13P-13	BRCA	MIR500A	hsa-mir-500a	chrX	+	3p	50008509	NA	flanking-3	NA	NA	6	G	A	55.2418	203.218	0.271835	-1.8792	0	0	-2.19369	0.0282576	1.54887	NO
TCGA-QQ-A8VF-01A-11R-A37H-13	SARC	MIR433	hsa-mir-433	chr14	+	3p	100881899	COSM3419628	seed_5p	3	NA	NA	C	T	1.27625	4.77054	0.267527	-1.90224	4.94852e-36	3.36994e-33	-0.917262	0.359005	0.444899	NO
TCGA-AX-A0IZ-01A-11R-A119-13	UCEC	MIR362	hsa-mir-362	chrX	+	5p	50009001	NA	loop	NA	10	NA	G	A	5.79837	22.5541	0.257086	-1.95967	7.46555e-201	5.08404e-198	-2.18246	0.0290758	1.53647	NO
TCGA-56-A4BX-01A-11H-A24G-13	LUSC	MIR134	hsa-mir-134	chr14	+	5p	101054689	NA	flanking-5	NA	NA	-5	G	T	73.6121	297.872	0.247127	-2.01668	5.58971e-136	3.80659e-133	-1.66452	0.0960082	1.01769	NO
TCGA-EB-A4OY-01A-11R-A25Z-13	SKCM	MIR370	hsa-mir-370	chr14	+	3p	100911131	NA	flanking-5	NA	NA	-20	G	A	2.20019	9.06767	0.242641	-2.0431	4.25294e-94	2.89625e-91	-1.25401	0.20984	0.678112	NO
TCGA-DD-A3A9-01A-11R-A25Z-13	LIHC	MIR432	hsa-mir-432	chr14	+	5p	100884538	COSM4920680	loop	NA	20	NA	G	A	2.40247	9.99438	0.240382	-2.0566	9.29903e-70	6.33264e-67	-1.15393	0.248528	0.604624	NO
TCGA-D3-A3ML-06A-11R-A21E-13	SKCM	MIR889	hsa-mir-889	chr14	+	3p	101047896	NA	flanking-5	NA	NA	-15	C	T	1.79094	7.49854	0.238839	-2.06589	7.82499e-103	5.32882e-100	-1.35158	0.176511	0.753229	NO
TCGA-EE-A29M-06A-11R-A18W-13	SKCM	MIR493	hsa-mir-493	chr14	+	both	100869097	COSN5026503	loop	NA	1	NA	C	T	2.34898	10.6666	0.220217	-2.183	4.75453e-104	3.23784e-101	-1.3647	0.172346	0.763598	NO
TCGA-92-8063-01A-11H-2246-13	LUSC	MIR551B	hsa-mir-551b	chr3	+	3p	168551952	NA	flanking-3	NA	NA	18	GC	G	2.03264	9.29998	0.218564	-2.19387	2.26505e-101	1.5425e-98	-1.29903	0.193935	0.712344	NO
TCGA-58-8391-01A-11H-2325-13	LUSC	MIR1247	hsa-mir-1247	chr14	-	5p	101560325	COSN1164334	flanking-3	NA	NA	1	C	A	3.63093	17.2488	0.210504	-2.24808	1.89988e-122	1.29382e-119	-1.51293	0.130296	0.885067	NO
TCGA-D3-A8GC-06A-11R-A37G-13	SKCM	MIR134	hsa-mir-134	chr14	+	5p	101054683	NA	flanking-5	NA	NA	-11	C	T	49.6751	236.529	0.210016	-2.25143	1.59392e-86	1.08546e-83	-1.18478	0.236104	0.626896	NO
TCGA-DX-A8BP-01A-11R-A37H-13	SARC	MIR411	hsa-mir-411	chr14	+	5p	101023365	NA	loop	NA	5	NA	A	C	3.00491	17.1598	0.175113	-2.51364	3.34797e-35	2.27997e-32	-0.902417	0.366835	0.435529	NO
TCGA-YG-AA3N-01A-11R-A38N-13	SKCM	MIR10B	hsa-mir-10b	chr2	+	5p	176150359	COSN1082676	loop	NA	8	NA	C	T	8108.1	47818.4	0.16956	-2.56013	5.80227e-185	3.95135e-182	-2.35336	0.0186044	1.73038	NO
TCGA-BC-A3KF-01A-11R-A214-13	LIHC	MIR149	hsa-mir-149	chr2	+	5p	240456083	NA	flanking-3	NA	NA	7	A	G	1.58157	9.58725	0.164966	-2.59976	8.32569e-128	5.6698e-125	-1.95288	0.0508342	1.29384	NO
TCGA-66-2795-01A-02T-0981-13	LUSC	MIR767	hsa-mir-767	chrX	-	5p	152393513	NA	flanking-5	NA	NA	-10	A	G	2.47019	15.0258	0.164396	-2.60475	2.44903e-61	1.66779e-58	-0.893497	0.371591	0.429935	NO
TCGA-66-2754-01A-01T-0981-13	LUSC	MIR223	hsa-mir-223	chrX	+	3p	66018930	COSM757840	loop	NA	14	NA	G	A	57.7787	415.535	0.139046	-2.84636	5.41869e-190	3.69013e-187	-2.33274	0.0196618	1.70638	NO
TCGA-AR-A256-01A-11R-A168-13	BRCA	MIR190B	hsa-mir-190b	chr1	-	5p	154193664	NA	flanking-3	NA	NA	12	C	T	1.65647	13.0887	0.126557	-2.98214	2.1333754587425e-319		-1.70513	0.0881699	1.05468	NO
TCGA-BC-A112-01A-11R-A130-13	LIHC	MIR452	hsa-mir-452	chrX	-	5p	151959609	NA	flanking-3	NA	NA	25	T	C	13.0536	155.503	0.0839443	-3.57442	1.88352e-142	1.28268e-139	-2.19282	0.02832	1.54791	NO
TCGA-FS-A1ZZ-06A-11R-A18V-13	SKCM	MIR134	hsa-mir-134	chr14	+	5p	101054686	NA	flanking-5	NA	NA	-8	C	T	19.1078	236.529	0.0807839	-3.62979	4.45726e-150	3.03539e-147	-1.91012	0.0561172	1.2509	NO
TCGA-EE-A3AD-06A-11R-A18V-13	SKCM	MIR506	hsa-mir-506	chrX	-	3p	147230805	COSN5028508	seed_5p	5	NA	NA	G	A	1.76612	77.9065	0.0226697	-5.46309	1.43277e-138	9.75715e-136	-1.74937	0.0802262	1.09568	NO
TCGA-OR-A5JB-01A-11R-A29W-13	ACC	MIR506	hsa-mir-506	chrX	-	3p	147230824	NA	flanking-5	NA	NA	-15	G	T	1.31395	96.0757	0.0136762	-6.19218	9.26126e-33	6.30692e-30	-2.30791	0.021004	1.6777	NO
TCGA-90-A4ED-01A-31H-A25B-13	LUSC	MIR22	hsa-mir-22	chr17	-	3p	1713996	NA	flanking-5	NA	NA	-23	G	A	44533	89079.4	0.499925	-1.00022	4.77981e-193	3.25505e-190	-2.36914	0.0178296	1.74886	YES
TCGA-64-1678-01A-01T-0947-13	LUAD	MIR34A	hsa-mir-34a	chr1	-	5p	9151671	NA	flanking-3	NA	NA	22	C	T	67.9195	247.653	0.274253	-1.86642	2.22305e-229	1.5139e-226	-2.61379	0.00895446	2.04796	YES
TCGA-AN-A0FL-01A-11R-A035-13	BRCA	MIR193A	hsa-mir-193a	chr17	+	both	31560083	NA	flanking-3	NA	NA	12	G	T	107.97	406.436	0.26565	-1.9124	0	0	-2.68557	0.00724069	2.14022	YES
TCGA-B5-A0JV-01A-11R-A103-13	UCEC	MIR500A	hsa-mir-500a	chrX	+	3p	50008517	NA	flanking-3	NA	NA	14	C	T	102.849	493.774	0.208292	-2.26332	9.81421e-240	6.68348e-237	-2.68055	0.00735016	2.1337	YES
TCGA-LL-A6FP-01A-11R-A31S-13	BRCA	MIR221	hsa-mir-221	chrX	-	3p	45746207	NA	loop	NA	14	NA	C	T	19.4959	117.734	0.165593	-2.59429	0	0	-2.63596	0.00838994	2.07624	YES
TCGA-BC-A112-01A-11R-A130-13	LIHC	MIR122	hsa-mir-122	chr18	+	5p	58451077	NA	flanking-5	NA	NA	-11	TAGC	T	156.179	16359.7	0.00954653	-6.71081	7.50573e-223	5.1114e-220	-3.86259	0.00011219	3.95005	YES
