# Supplementary material for: miRNA gene mutations commonly disrupt the proper functioning of miRNA genes
Source: Research Square preprint supplement (doi:10.21203/rs.3.rs-7029847/v1), 2025-07-21
Supplement: Supplementary file 3 [file 5579b98f4b370b03dcc6bcc2.xlsx]

## Sheet: Supplementary Table S6
sample_ID	cancer	mIRNA_gene	miRBase_ID	chromosome	miRNA_gene_orientation	miRNA_strand_balance	mutation_position	mutation_ID_COSMIC	mutation_subregion	analyzed_strand	pos_mut_mature_miRNA	pos_mut_loop	pos_mut_flank	reference_allele	alternative_allele	RPM_miRNA_sum_mut	RPM_miRNA_mean_wt	number_wt_RPM≥20	one_sample_t-test_p -value	Bonferroni_corrected_one_sample_t-test_p-value	z-score	z-score_p-value	-log10(p-value)z-score	sum_of_distance_mut	sum_of_distance_wt
TCGA-13-0904-01A-02R-1564-13	OV	MIR100	hsa-mir-100	chr11	-	5p	122152219	NA	flanking-3	5p	NA	NA	21	C	T	72559.7	8870.44	488	1.21928e-302	6.52312e-300	4.01341	5.98483e-05	4.22295	0.504328	0.127847
TCGA-A6-6653-01A-11H-1773-13	COAD	MIR10B	hsa-mir-10b	chr2	+	5p	176150322	NA	flanking-5	5p	NA	NA	-7	CTA	C	61768.1	39869.9	432	0	0	10.5996	2.99338e-26	25.5238	0.383966	0.0472195
TCGA-66-2789-01A-01T-0981-13	LUSC	MIR126	hsa-mir-126	chr9	+	both	136670610	COSN494120	flanking-5	5p	NA	NA	-6	A	T	188.88	272.554	465	0	0	4.8449	1.26673e-06	5.89732	0.220094	0.0632375
TCGA-EE-A2M5-06A-12R-A18V-13	SKCM	MIR127	hsa-mir-127	chr14	+	3p	100883041	COSM3493809	seed_3p	5p	7	NA	NA	C	T	119.233	113.968	294	9.58708e-143	5.12909e-140	2.84652	0.00441993	2.35458	0.61463	0.232574
TCGA-D3-A8GC-06A-11R-A37G-13	SKCM	MIR134	hsa-mir-134	chr14	+	5p	101054683	NA	flanking-5	5p	NA	NA	-11	C	T	48.6751	611.207	429	5.9265e-187	3.17068e-184	2.50852	0.0121238	1.91636	0.426749	0.148455
TCGA-56-7823-01B-11H-2246-13	LUSC	MIR135B	hsa-mir-135b	chr1	-	5p	205448347	NA	loop	5p	NA	14	NA	G	GT	41.1048	69.2762	303	8.08476e-126	4.32534e-123	2.36333	0.0181113	1.74205	0.392902	0.156938
TCGA-GS-A9TT-01A-11R-A38N-13	DLBC	MIR142	hsa-mir-142	chr17	-	both	58331234	NA	flanking-3	3p	NA	NA	11	C	T	21617	22752.8	39	4.52724e-34	2.42207e-31	6.98569	2.83451e-12	11.5475	0.516491	0.105871
TCGA-78-7155-01A-11H-2038-13	LUAD	MIR196B	hsa-mir-196b	chr7	-	5p	27169485	NA	flanking-3	5p	NA	NA	8	G	A	219.368	156.649	257	7.32e-165	3.9162e-162	4.2009	2.65857e-05	4.57535	0.486214	0.123834
TCGA-46-3769-01A-01T-0981-13	LUSC	MIR196B	hsa-mir-196b	chr7	-	5p	27169539	COSN2378927	non-seed duplex_5p	5p	11	NA	NA	G	A	241.929	593.868	451	1.73652e-205	9.29037e-203	2.64543	0.00815874	2.08838	0.279107	0.111616
TCGA-BT-A0YX-01A-11R-A10V-13	BLCA	MIR205	hsa-mir-205	chr1	+	5p	209432226	COSN8407113	flanking-3	5p	NA	NA	3	G	C	6223.96	3543.13	394	4.84158e-164	2.59025e-161	2.37838	0.0173889	1.75973	0.356582	0.154124
TCGA-UY-A9PD-01A-11R-A38M-13	BLCA	MIR205	hsa-mir-205	chr1	+	5p	209432162	NA	flanking-5	5p	NA	NA	-4	C	T	921.999	3543.13	394	2.09268e-138	1.11959e-135	1.98264	0.0474071	1.32416	0.322895	0.154124
TCGA-FA-A6HN-01A-11R-A31S-13	DLBC	MIR21	hsa-mir-21	chr17	+	5p	59841260	NA	flanking-5	3p	NA	NA	-13	C	G	5125.59	4021.18	46	1.97993e-34	1.05926e-31	5.2004	1.98858e-07	6.70146	0.706284	0.15706
TCGA-66-2754-01A-01T-0981-13	LUSC	MIR223	hsa-mir-223	chrX	+	3p	66018930	COSM757840	loop	3p	NA	14	NA	G	A	56.3381	636.223	465	0	0	5.46207	4.70602e-08	7.32735	0.423985	0.108482
TCGA-AA-3864-01A-01T-1021-13	COAD	MIR223	hsa-mir-223	chrX	+	3p	66018886	NA	flanking-5	3p	NA	NA	-9	G	A	572.302	697.934	433	1.43959e-176	7.7018e-174	2.32591	0.0200234	1.69846	0.309364	0.135048
TCGA-DI-A0WH-01A-12R-A12H-13	UCEC	MIR27A	hsa-mir-27a	chr19	-	3p	13836448	COSN2382145	non-seed duplex_3p	5p	20	NA	NA	C	T	79.0925	35.1553	128	3.24578e-82	1.73649e-79	4.1577	3.21464e-05	4.49287	0.670661	0.181136
TCGA-D3-A8GN-06A-11R-A37G-13	SKCM	MIR29A	hsa-mir-29a	chr7	-	3p	130876738	NA	flanking-3	5p	NA	NA	10	C	T	25.2725	37.2163	50	4.42812e-26	2.36904e-23	2.95909	0.00308552	2.51067	0.989098	0.340603
TCGA-BA-4076-01A-01T-1435-13	HNSC	MIR30A	hsa-mir-30a	chr6	-	5p	71403620	NA	flanking-5	3p	NA	NA	-4	G	C	889.803	2418.73	518	4.44168e-198	2.3763e-195	2.17224	0.0298376	1.52524	0.298935	0.136672
TCGA-37-3792-01A-01T-0981-13	LUSC	MIR32	hsa-mir-32	chr9	-	5p	109046214	NA	flanking-3	5p	NA	NA	17	T	A	23.3946	52.9184	346	1.10979e-213	5.93737e-211	3.97579	7.01453e-05	4.154	0.281114	0.0944462
TCGA-66-2795-01A-02T-0981-13	LUSC	MIR320A	hsa-mir-320a	chr8	-	3p	22244987	COSN2378943	non-seed duplex_3p	3p	10	NA	NA	C	T	220.985	703.359	465	0	0	9.19492	3.75285e-20	19.4256	0.622574	0.115366
TCGA-FR-A8YC-06A-11R-A37G-13	SKCM	MIR342	hsa-mir-342	chr14	+	3p	100109729	COSN1080961	non-seed duplex_3p	3p	15	NA	NA	C	T	1789.62	446.564	446	0	0	6.00417	1.92312e-09	8.71599	1.10027	0.255441
TCGA-64-1678-01A-01T-0947-13	LUAD	MIR34A	hsa-mir-34a	chr1	-	5p	9151671	NA	flanking-3	5p	NA	NA	22	C	T	65.5905	340.653	509	0	0	4.56905	4.89935e-06	5.30986	0.51548	0.145948
TCGA-KN-8434-01A-11R-2314-13	KICH	MIR363	hsa-mir-363	chrX	-	3p	134169420	NA	loop	3p	NA	5	NA	C	A	63.5775	143.192	54	5.82363e-23	3.11564e-20	2.29559	0.0216993	1.66355	0.432035	0.239196
TCGA-GN-A26C-01A-11R-A18W-13	SKCM	MIR379	hsa-mir-379	chr14	+	5p	101022098	NA	loop	5p	NA	7	NA	G	A	232.82	859.079	441	0	0	9.47613	2.6388e-21	20.5786	1.25386	0.12169
TCGA-B6-A0RE-01A-11R-A057-13	BRCA	MIR409	hsa-mir-409	chr14	+	both	101065337	COSN23014474	loop	3p	NA	1	NA	C	G	26.7564	73.4508	522	4.73544e-253	2.53346e-250	2.85835	0.00425844	2.37075	0.643657	0.298217
TCGA-2Y-A9H0-01A-11R-A38M-13	LIHC	MIR425	hsa-mir-425	chr3	-	5p	49020234	NA	flanking-5	5p	NA	NA	-13	C	G	600.728	229.099	368	2.64659e-221	1.41593e-218	3.82278	0.000131958	3.87957	0.392384	0.149216
TCGA-EY-A2OP-01A-11R-A19V-13	UCEC	MIR452	hsa-mir-452	chrX	-	5p	151959720	NA	flanking-5	5p	NA	NA	-21	A	C	27.7385	77.6052	381	3.64518e-168	1.95017e-165	2.54295	0.0109922	1.95892	0.523661	0.217233
TCGA-13-1477-01A-01R-1565-13	OV	MIR505	hsa-mir-505	chrX	-	3p	139924228	NA	flanking-5	3p	NA	NA	-11	C	T	117.223	190.266	487	1.64655e-185	8.80902e-183	2.16207	0.0306131	1.51409	0.517818	0.268396
TCGA-EE-A3J7-06A-11R-A20E-13	SKCM	MIR505	hsa-mir-505	chrX	-	3p	139924139	NA	flanking-3	3p	NA	NA	21	G	A	30.3274	97.2477	412	9.10355e-144	4.8704e-141	1.97036	0.0487975	1.3116	0.574196	0.301259
TCGA-AJ-A2QO-01A-11R-A18L-13	UCEC	MIR542	hsa-mir-542	chrX	-	3p	134541389	NA	loop	3p	NA	11	NA	G	A	80.7971	287.708	522	2.14458e-203	1.14735e-200	2.21671	0.0266426	1.57442	0.280535	0.131082
TCGA-05-4415-01A-22H-1857-13	LUAD	MIR664A	hsa-mir-664a	chr1	-	both	220200531	NA	flanking-3	3p	NA	NA	18	T	C	43.7638	59.8161	353	4.57377e-161	2.44697e-158	2.64305	0.00821631	2.08532	0.394036	0.166911
TCGA-B6-A0RT-01A-21R-A085-13	BRCA	MIRLET7C	hsa-let-7c	chr21	+	5p	16539919	NA	flanking-3	3p	NA	NA	15	A	C	35.4538	55.9102	436	1.76104e-220	9.42155e-218	3.01173	0.00259762	2.58542	0.522366	0.17896
TCGA-B5-A11G-01A-13R-A119-13	UCEC	MIRLET7D	hsa-let-7d	chr9	+	5p	94178817	NA	flanking-5	3p	NA	NA	-24	GA	G	1302.33	592.385	508	9.50723e-303	5.08637e-300	3.7827	0.000155133	3.80929	0.558731	0.163006
TCGA-B5-A11G-01A-13R-A119-13	UCEC	MIRLET7D	hsa-let-7d	chr9	+	5p	94178817	NA	flanking-5	5p	NA	NA	-24	GA	G	802.418	443.664	508	3.02807e-270	1.62002e-267	3.22433	0.00126266	2.89871	0.38208	0.124733
TCGA-EJ-7781-01A-11R-2117-13	PRAD	MIR100	hsa-mir-100	chr11	-	5p	122152219	NA	flanking-3	5p	NA	NA	21	C	T	12297.5	10768.9	489	1.76268e-93	9.43036e-91	1.16919	0.242328	0.615596	0.133998	0.0708841
TCGA-D1-A16Y-01A-31R-A12H-13	UCEC	MIR100	hsa-mir-100	chr11	-	5p	122152232	NA	flanking-3	5p	NA	NA	8	A	G	3528.16	4148.61	522	9.01874e-95	4.82502e-92	-1.12559	0.260341	0.584458	0.0171675	0.106562
TCGA-G4-6628-01A-11H-1838-13	COAD	MIR100	hsa-mir-100	chr11	-	5p	122152215	NA	flanking-3	5p	NA	NA	25	G	T	2232.05	4766.63	433	1.39125e-29	7.44317e-27	-0.58583	0.55799	0.253374	0.057008	0.112268
TCGA-BG-A0VZ-01A-11R-A108-13	UCEC	MIR100	hsa-mir-100	chr11	-	5p	122152265	COSN2381375	loop	5p	NA	10	NA	G	T	1231.9	4148.61	522	4.72925e-34	2.53015e-31	0.572943	0.566683	0.24666	0.152066	0.106562
TCGA-B5-A0JS-01A-11R-A103-13	UCEC	MIR106A	hsa-mir-106a	chrX	-	5p	134170270	COSN2383038	flanking-5	5p	NA	NA	-4	T	G	124.735	80.8367	239	4.66023e-18	2.49322e-15	-0.608175	0.543072	0.265143	0.204294	0.306328
TCGA-EB-A4IS-01A-21R-A25Z-13	SKCM	MIR106B	hsa-mir-106b	chr7	-	5p	100093979	NA	flanking-3	3p	NA	NA	23	G	A	1121.04	1245.25	449	1.66021e-99	8.88213e-97	-1.31121	0.189786	0.721735	0.0336025	0.183846
TCGA-39-5019-01A-01T-1819-13	LUSC	MIR106B	hsa-mir-106b	chr7	-	5p	100094036	COSN493976	loop	3p	NA	7	NA	G	A	510.612	680.771	466	1.55935e-90	8.34253e-88	1.18287	0.23686	0.625507	0.195946	0.113212
TCGA-EB-A4IS-01A-21R-A25Z-13	SKCM	MIR106B	hsa-mir-106b	chr7	-	5p	100093979	NA	flanking-3	5p	NA	NA	23	G	A	247.24	274.198	449	3.07882e-83	1.64717e-80	-1.14081	0.253951	0.59525	0.0302787	0.158373
TCGA-VQ-AA64-01A-11R-A415-13	STAD	MIR106B	hsa-mir-106b	chr7	-	5p	100094069	NA	flanking-5	5p	NA	NA	-6	G	A	248.367	351.908	422	1.05776e-69	5.65901e-67	-1.04623	0.295456	0.529508	0.0469514	0.107676
TCGA-VQ-A924-01A-11R-A415-13	STAD	MIR106B	hsa-mir-106b	chr7	-	5p	100094026	NA	loop	3p	NA	17	NA	G	A	145.237	415.554	422	4.86214e-58	2.60124e-55	-0.919011	0.35809	0.446008	0.062941	0.138017
TCGA-VQ-A924-01A-11R-A415-13	STAD	MIR106B	hsa-mir-106b	chr7	-	5p	100094026	NA	loop	5p	NA	17	NA	G	A	114.553	351.908	422	1.44869e-54	7.75047e-52	-0.880955	0.378342	0.422115	0.0565442	0.107676
TCGA-DX-A48J-01A-21R-A30J-13	SARC	MIR106B	hsa-mir-106b	chr7	-	5p	100093982	NA	flanking-3	3p	NA	NA	20	G	A	74.8215	322.477	258	6.38412e-31	3.41551e-28	-0.825433	0.409126	0.388143	0.0851035	0.146127
TCGA-DX-A48J-01A-21R-A30J-13	SARC	MIR106B	hsa-mir-106b	chr7	-	5p	100093982	NA	flanking-3	5p	NA	NA	20	G	A	33.2322	201.036	257	1.454e-29	7.7789e-27	-0.802767	0.422109	0.374575	0.100305	0.177121
TCGA-LN-A49L-01A-11R-A24L-13	ESCA	MIR106B	hsa-mir-106b	chr7	-	5p	100094029	NA	loop	5p	NA	14	NA	C	T	723.81	425.617	182	6.26105e-10	3.34966e-07	0.484405	0.628098	0.201972	0.125253	0.0998658
TCGA-LN-A49L-01A-11R-A24L-13	ESCA	MIR106B	hsa-mir-106b	chr7	-	5p	100094029	NA	loop	3p	NA	14	NA	C	T	861.295	454.967	182	2.30005e-05	0.0123053	0.322208	0.747295	0.126508	0.173792	0.146748
TCGA-39-5019-01A-01T-1819-13	LUSC	MIR106B	hsa-mir-106b	chr7	-	5p	100094036	COSN493976	loop	5p	NA	7	NA	G	A	341.057	416.604	466	0.00912442	1	-0.121292	0.90346	0.0440911	0.101665	0.109509
TCGA-VQ-AA64-01A-11R-A415-13	STAD	MIR106B	hsa-mir-106b	chr7	-	5p	100094069	NA	flanking-5	3p	NA	NA	-6	G	A	348.304	415.554	422	0.0988291	1	-0.080526	0.935819	0.0288082	0.131438	0.138017
TCGA-51-4080-01A-01T-1557-13	LUSC	MIR10A	hsa-mir-10a	chr17	-	5p	48579940	NA	flanking-5	5p	NA	NA	-14	G	C	36786.6	24052.2	466	3.15033e-287	1.68543e-284	3.97481	7.04369e-05	4.1522	0.144385	0.0396664
TCGA-D1-A3DH-01A-11R-A19V-13	UCEC	MIR10B	hsa-mir-10b	chr2	+	5p	176150317	NA	flanking-5	5p	NA	NA	-12	G	A	284324	126492	522	6.74204e-265	3.60699e-262	3.03019	0.00244399	2.6119	0.122126	0.0417787
TCGA-D1-A3DH-01A-11R-A19V-13	UCEC	MIR10B	hsa-mir-10b	chr2	+	5p	176150317	NA	flanking-5	3p	NA	NA	-12	G	A	26.9654	70.5341	338	4.62795e-44	2.47595e-41	0.881241	0.378187	0.422293	0.352293	0.232967
TCGA-70-6723-01A-11H-1819-13	LUSC	MIR10B	hsa-mir-10b	chr2	+	5p	176150376	COSN2378653	non-seed duplex_3p	5p	9	NA	NA	G	A	21529.9	11666.9	466	9.60539e-50	5.13889e-47	-0.777215	0.437032	0.359487	0.0237724	0.0443318
TCGA-A6-2674-01A-02T-0822-13_GRCh37-lite	COAD	MIR10B	hsa-mir-10b	chr2	+	5p	176150360	NA	loop	5p	NA	9	NA	G	A	25287.9	39869.9	432	5.86981e-38	3.14035e-35	-0.684822	0.493456	0.306751	0.0254629	0.0472195
TCGA-YG-AA3N-01A-11R-A38N-13	SKCM	MIR10B	hsa-mir-10b	chr2	+	5p	176150359	COSN1082676	loop	5p	NA	8	NA	C	T	8101.77	60685	449	8.67151e-25	4.63926e-22	-0.515528	0.606184	0.217395	0.0520911	0.0805122
TCGA-A6-6653-01A-11H-1773-13	COAD	MIR10B	hsa-mir-10b	chr2	+	5p	176150322	NA	flanking-5	3p	NA	NA	-7	CTA	C	69.8743	49.9293	55	0.000896125	0.479427	0.474092	0.635434	0.196929	0.447622	0.368997
TCGA-L7-A6VZ-01A-12R-A337-13	ESCA	MIR10B	hsa-mir-10b	chr2	+	5p	176150413	NA	flanking-3	5p	NA	NA	24	C	T	8054.94	16169	182	3.85841e-08	2.06425e-05	-0.425724	0.670309	0.173725	0.0346611	0.044993
TCGA-A5-A0GP-01A-11R-A041-13	UCEC	MIR10B	hsa-mir-10b	chr2	+	5p	176150342	COSN1082679	non-seed duplex_5p	5p	14	NA	NA	C	T	258843	126633	522	0.000820715	0.439083	-0.147299	0.882896	0.0540905	0.0378436	0.0417467
TCGA-HF-A5NB-01A-11R-A31Q-13	STAD	MIR10B	hsa-mir-10b	chr2	+	5p	176150413	NA	flanking-3	5p	NA	NA	24	C	T	5565.2	13381.4	423	0.0210228	1	-0.11262	0.910332	0.0408003	0.0373173	0.0395569
TCGA-A5-A0GP-01A-11R-A041-13	UCEC	MIR10B	hsa-mir-10b	chr2	+	5p	176150342	COSN1082679	non-seed duplex_5p	3p	14	NA	NA	C	T	57.7366	70.5341	338	0.200271	1	0.0698019	0.944351	0.0248664	0.242418	0.232967
TCGA-CC-A7IF-01A-11R-A33A-13	LIHC	MIR122	hsa-mir-122	chr18	+	5p	58451084	COSN16303070	flanking-5	5p	NA	NA	-4	G	A	28961.9	23546.3	368	1.65969e-43	8.87934e-41	-0.826674	0.408422	0.388891	0.0952919	0.180959
TCGA-CC-A7IF-01A-11R-A33A-13	LIHC	MIR122	hsa-mir-122	chr18	+	5p	58451084	COSN16303070	flanking-5	3p	NA	NA	-4	G	A	174.536	204.247	348	8.06475e-22	4.31464e-19	-0.551134	0.581542	0.235419	0.116695	0.158668
TCGA-BC-A112-01A-11R-A130-13	LIHC	MIR122	hsa-mir-122	chr18	+	5p	58451077	NA	flanking-5	5p	NA	NA	-11	TAGC	T	153.431	23546.3	368	3.39339e-05	0.0181546	-0.218796	0.826809	0.0825948	0.158286	0.180959
TCGA-BF-A3DM-01A-11R-A20E-13	SKCM	MIR1226	hsa-mir-1226	chr3	+	3p	47849594	NA	loop	3p	NA	14	NA	C	T	53.0905	31.1998	85	9.34387e-09	4.99897e-06	0.691663	0.489149	0.310559	0.30763	0.198946
TCGA-93-8067-01A-11H-2286-13	LUAD	MIR1247	hsa-mir-1247	chr14	-	5p	101560306	NA	flanking-3	3p	NA	NA	20	G	A	49.536	69.1983	107	7.72367e-14	4.13216e-11	0.831603	0.405633	0.391866	0.242069	0.160471
TCGA-BR-4370-01A-01R-1157-13	STAD	MIR1247	hsa-mir-1247	chr14	-	5p	101560306	NA	flanking-3	3p	NA	NA	20	G	A	32.3237	66.4578	94	3.06313e-10	1.63878e-07	-0.727385	0.46699	0.330693	0.0963251	0.151148
TCGA-UU-A93S-01A-21R-A41G-13	BRCA	MIR125A	hsa-mir-125a	chr19	+	5p	51693330	NA	flanking-3	5p	NA	NA	3	G	T	484.789	800.396	1073	9.02196e-149	4.82675e-146	0.93613	0.349207	0.456918	0.149212	0.0896752
TCGA-V3-A9ZX-01A-11R-A40B-13	UVM	MIR125A	hsa-mir-125a	chr19	+	5p	51693260	NA	flanking-5	5p	NA	NA	-8	T	A	3375.86	4140.32	79	6.67625e-12	3.57179e-09	0.908728	0.363494	0.439503	0.222879	0.134629
TCGA-B5-A0K6-01A-11R-A041-13	UCEC	MIR125A	hsa-mir-125a	chr19	+	5p	51693267	COSN2382193	flanking-5	5p	NA	NA	-1	G	T	692.042	853.942	521	1.36029e-49	7.27757e-47	-0.72378	0.469201	0.328641	0.0420684	0.0898379
TCGA-BS-A0U8-01A-11R-A103-13	UCEC	MIR125A	hsa-mir-125a	chr19	+	5p	51693309	COSN2382192	seed_3p	5p	4	NA	NA	G	T	528.725	853.942	521	6.44491e-35	3.44802e-32	0.58236	0.560324	0.251561	0.128274	0.0898379
TCGA-N5-A59E-01A-11R-A28Z-13	UCS	MIR126	hsa-mir-126	chr9	+	both	136670683	NA	flanking-3	5p	NA	NA	9	G	C	145.28	129.174	55	3.38528e-13	1.81112e-10	-1.28789	0.197783	0.70381	0.0244269	0.0652678
TCGA-N5-A59E-01A-11R-A28Z-13	UCS	MIR126	hsa-mir-126	chr9	+	both	136670683	NA	flanking-3	3p	NA	NA	9	G	C	3218.77	2275.96	55	0.530953	1	0.0850319	0.932236	0.0304741	0.0621376	0.0597484
TCGA-66-2789-01A-01T-0981-13	LUSC	MIR126	hsa-mir-126	chr9	+	both	136670610	COSN494120	flanking-5	3p	NA	NA	-6	A	T	2980.31	3059.37	465	0.506685	1	-0.0308166	0.975416	0.0108102	0.0702826	0.0718096
TCGA-FD-A3SM-01A-11R-A22V-13	BLCA	MIR127	hsa-mir-127	chr14	+	3p	100883075	NA	flanking-3	3p	NA	NA	19	C	G	1024.45	1043.06	404	8.75072e-86	4.68164e-83	-1.26504	0.205858	0.686433	0.0262637	0.0972979
TCGA-FD-A3SM-01A-11R-A22V-13	BLCA	MIR127	hsa-mir-127	chr14	+	3p	100883075	NA	flanking-3	5p	NA	NA	19	C	G	181.113	178.989	399	5.33734e-84	2.85548e-81	-1.25621	0.209041	0.67977	0.0440074	0.148029
TCGA-EB-A3Y7-01A-11R-A23A-13	SKCM	MIR127	hsa-mir-127	chr14	+	3p	100883033	COSM3493808	loop	3p	NA	11	NA	C	T	278.451	937.603	444	1.33393e-72	7.13654e-70	-1.03955	0.298549	0.524985	0.0263038	0.144289
TCGA-E2-A10C-01A-21R-A10I-13	BRCA	MIR127	hsa-mir-127	chr14	+	3p	100883069	NA	flanking-3	5p	NA	NA	13	C	T	173.136	292.312	1058	2.7307e-127	1.46092e-124	-0.851059	0.394737	0.403692	0.0752211	0.166074
TCGA-EE-A29M-06A-11R-A18W-13	SKCM	MIR127	hsa-mir-127	chr14	+	3p	100883030	COSM3493807	loop	3p	NA	8	NA	G	A	171.769	937.603	444	1.34341e-43	7.18727e-41	0.735538	0.462012	0.335347	0.22777	0.144289
TCGA-05-4397-01A-01T-1207-13	LUAD	MIR127	hsa-mir-127	chr14	+	3p	100883038	COSM6075319	seed_3p	3p	4	NA	NA	G	T	328.866	908.619	509	5.16197e-32	2.76165e-29	0.560027	0.575461	0.239984	0.141566	0.104783
TCGA-EE-A2M5-06A-12R-A18V-13	SKCM	MIR127	hsa-mir-127	chr14	+	3p	100883041	COSM3493809	seed_3p	3p	7	NA	NA	C	T	1663.45	940.853	444	5.62073e-18	3.00709e-15	0.428191	0.668512	0.174891	0.192929	0.14431
TCGA-05-4397-01A-01T-1207-13	LUAD	MIR127	hsa-mir-127	chr14	+	3p	100883038	COSM6075319	seed_3p	5p	4	NA	NA	G	T	96.5533	229.061	496	1.42492e-11	7.6233e-09	0.310614	0.756094	0.121424	0.186614	0.157034
TCGA-E2-A10C-01A-21R-A10I-13	BRCA	MIR127	hsa-mir-127	chr14	+	3p	100883069	NA	flanking-3	3p	NA	NA	13	C	T	586.085	954.591	1072	9.35082e-22	5.00269e-19	-0.299175	0.764807	0.116448	0.0841182	0.106136
TCGA-EB-A431-01A-11R-A25Z-13	SKCM	MIR1306	hsa-mir-1306	chr22	+	both	20086146	NA	flanking-3	5p	NA	NA	17	C	T	49.0367	54.0496	243	2.23547e-30	1.19598e-27	0.847698	0.396606	0.40164	0.344742	0.231767
TCGA-D1-A0ZS-01A-11R-A119-13	UCEC	MIR1307	hsa-mir-1307	chr10	-	both	103394290	NA	flanking-3	5p	NA	NA	11	C	T	75.8574	734.979	521	2.07132e-144	1.10815e-141	1.58787	0.112315	0.949563	0.234569	0.12614
TCGA-LP-A7HU-01A-11R-A342-13	CESC	MIR1307	hsa-mir-1307	chr10	-	both	103394297	COSN16128613	flanking-3	5p	NA	NA	4	C	T	148.082	314.966	304	4.12784e-71	2.2084e-68	-1.36155	0.173341	0.761099	0.0381316	0.128754
TCGA-D1-A16Y-01A-31R-A12H-13	UCEC	MIR1307	hsa-mir-1307	chr10	-	both	103394308	COSN1079925	non-seed duplex_3p	5p	15	NA	NA	G	A	281.327	734.979	521	2.00926e-51	1.07495e-48	-0.740704	0.458873	0.338308	0.075561	0.12614
TCGA-ZN-A9VQ-01A-11R-A404-13	MESO	MIR1307	hsa-mir-1307	chr10	-	both	103394332	NA	loop	3p	NA	9	NA	A	G	1025.75	1004.57	86	2.97357e-06	0.00159086	-0.539779	0.58935	0.229627	0.0768404	0.110788
TCGA-D1-A16Y-01A-31R-A12H-13	UCEC	MIR1307	hsa-mir-1307	chr10	-	both	103394308	COSN1079925	non-seed duplex_3p	3p	15	NA	NA	G	A	939.52	2113.84	522	1.20344e-24	6.43841e-22	-0.472391	0.636648	0.196101	0.0707773	0.103403
TCGA-LP-A7HU-01A-11R-A342-13	CESC	MIR1307	hsa-mir-1307	chr10	-	both	103394297	COSN16128613	flanking-3	3p	NA	NA	4	C	T	324.495	1403.71	304	6.27019e-05	0.0335455	-0.232818	0.815903	0.0883615	0.101092	0.114339
TCGA-D1-A0ZS-01A-11R-A119-13	UCEC	MIR1307	hsa-mir-1307	chr10	-	both	103394290	NA	flanking-3	3p	NA	NA	11	C	T	981.055	2107.49	522	0.00940905	1	0.114084	0.909171	0.0413542	0.11129	0.103408
TCGA-ZN-A9VQ-01A-11R-A404-13	MESO	MIR1307	hsa-mir-1307	chr10	-	both	103394332	NA	loop	5p	NA	9	NA	A	G	179.571	239.146	86	0.986262	1	0.00186225	0.998514	0.000645779	0.17549	0.17531
TCGA-AX-A2HJ-01A-11R-A17A-13	UCEC	MIR130A	hsa-mir-130a	chr11	+	3p	57641278	NA	flanking-3	3p	NA	NA	5	C	T	86.3092	232.274	515	5.48767e-29	2.93591e-26	-0.52412	0.600195	0.221708	0.121901	0.166759
TCGA-BG-A0YV-01A-11R-A10I-13	UCEC	MIR130A	hsa-mir-130a	chr11	+	3p	57641279	COSN2381402	flanking-3	3p	NA	NA	6	G	A	412.981	232.274	515	0.00332276	1	0.129992	0.896573	0.0474144	0.177885	0.166759
TCGA-KQ-A41R-01A-21R-A358-13	BLCA	MIR134	hsa-mir-134	chr14	+	5p	101054719	NA	loop	5p	NA	4	NA	G	A	108.82	380.32	405	4.74075e-77	2.5363e-74	-1.16145	0.245457	0.610024	0.0308691	0.101235
TCGA-22-4613-01A-01T-1442-13	LUSC	MIR134	hsa-mir-134	chr14	+	5p	101054684	NA	flanking-5	5p	NA	NA	-10	G	A	170.823	561.433	465	6.38302e-70	3.41491e-67	-0.97987	0.32715	0.485253	0.0340478	0.0976556
TCGA-BS-A0TJ-01A-11R-A103-13	UCEC	MIR134	hsa-mir-134	chr14	+	5p	101054749	COSN2381582	non-seed duplex_3p	5p	18	NA	NA	C	A	277.169	327.479	519	2.91718e-68	1.56069e-65	-0.894805	0.370891	0.430753	0.0556128	0.119798
TCGA-56-A4BX-01A-11H-A24G-13	LUSC	MIR134	hsa-mir-134	chr14	+	5p	101054689	NA	flanking-5	5p	NA	NA	-5	G	T	72.1524	561.433	465	1.64951e-17	8.82487e-15	0.411109	0.680992	0.166858	0.124343	0.0976556
TCGA-93-7348-01A-21H-2038-13	LUAD	MIR134	hsa-mir-134	chr14	+	5p	101054684	NA	flanking-5	5p	NA	NA	-10	G	A	2318.23	391.731	505	1.88883e-06	0.00101053	-0.214557	0.830112	0.0808631	0.0896571	0.104146
TCGA-BA-6871-01A-11R-1872-13	HNSC	MIR134	hsa-mir-134	chr14	+	5p	101054677	NA	flanking-5	5p	NA	NA	-17	C	G	780.347	419.717	517	0.230561	1	0.0527906	0.957899	0.0186804	0.105192	0.102147
TCGA-22-5478-01A-01T-1634-13	LUSC	MIR136	hsa-mir-136	chr14	+	both	100884795	NA	flanking-3	5p	NA	NA	24	G	A	43.9261	59.7786	258	3.00569e-52	1.60804e-49	-1.2077	0.227164	0.643661	0.042709	0.154487
TCGA-A6-6141-01A-11H-1773-13	COAD	MIR136	hsa-mir-136	chr14	+	both	100884768	COSM1368270	non-seed duplex_3p	5p	19	NA	NA	G	A	22.8697	44.5593	168	1.12266e-28	6.00623e-26	-1.04493	0.296056	0.528627	0.0802057	0.180043
TCGA-B0-5095-01A-01R-1419-13	KIRC	MIR136	hsa-mir-136	chr14	+	both	100884745	COSM469664	loop	5p	NA	7	NA	T	C	19.9153	33.8969	29	2.67714e-05	0.0143227	-0.930874	0.351919	0.453558	0.102188	0.178468
TCGA-23-2081-01A-01R-1568-13	OV	MIR139	hsa-mir-139	chr11	-	5p	72615081	COSN18246415	seed_3p	3p	8	NA	NA	C	T	24.6029	86.8165	314	4.02571e-24	2.15375e-21	0.622526	0.533596	0.272787	0.234227	0.169694
TCGA-23-2081-01A-01R-1568-13	OV	MIR139	hsa-mir-139	chr11	-	5p	72615081	COSN18246415	seed_3p	5p	8	NA	NA	C	T	99.3155	110.551	473	3.33484e-20	1.78414e-17	-0.443361	0.657505	0.182101	0.095757	0.132196
TCGA-AM-5821-01A-01T-1652-13	COAD	MIR139	hsa-mir-139	chr11	-	5p	72615096	COSN18276733	loop	5p	NA	6	NA	A	G	28.0081	67.682	392	1.73323e-16	9.27276e-14	0.435176	0.663435	0.178202	0.24156	0.18746
TCGA-AA-A01R-01A-21R-A082-13	COAD	MIR139	hsa-mir-139	chr11	-	5p	72615081	COSN18246415	seed_3p	5p	8	NA	NA	C	T	21.8679	67.682	392	0.0333903	1	-0.107829	0.914132	0.0389913	0.174054	0.18746
TCGA-P4-AAVL-01A-11R-A42U-13	KIRP	MIR140	hsa-mir-140	chr16	+	3p	69933178	NA	flanking-3	5p	NA	NA	16	A	AC	30.1863	62.455	257	7.73186e-86	4.13655e-83	1.87263	0.0611202	1.21382	0.173822	0.0842515
TCGA-CQ-6225-01A-11R-1914-13	HNSC	MIR140	hsa-mir-140	chr16	+	3p	69933129	NA	loop	3p	NA	5	NA	C	T	554.438	945.304	519	4.22403e-108	2.25986e-105	1.25045	0.211136	0.675438	0.190809	0.108607
TCGA-D8-A1JG-01B-11R-A13P-13	BRCA	MIR140	hsa-mir-140	chr16	+	3p	69933099	COSN23014990	flanking-5	5p	NA	NA	-4	C	T	35.7423	80.1868	952	2.88569e-120	1.54384e-117	0.878114	0.379882	0.420352	0.210999	0.140393
TCGA-AA-3833-01A-01T-0906-13	COAD	MIR140	hsa-mir-140	chr16	+	3p	69933129	NA	loop	5p	NA	5	NA	C	T	41.4447	76.6822	426	1.64698e-47	8.81137e-45	0.798168	0.424773	0.371843	0.232159	0.155109
TCGA-CQ-6225-01A-11R-1914-13	HNSC	MIR140	hsa-mir-140	chr16	+	3p	69933129	NA	loop	5p	NA	5	NA	C	T	24.6083	58.2711	476	1.26493e-52	6.76739e-50	0.795584	0.426274	0.370311	0.181647	0.124272
TCGA-AA-3833-01A-01T-0906-13	COAD	MIR140	hsa-mir-140	chr16	+	3p	69933129	NA	loop	3p	NA	5	NA	C	T	861.878	1228.6	432	1.09356e-25	5.85053e-23	-0.538327	0.590351	0.228889	0.0574661	0.0881643
TCGA-P4-AAVL-01A-11R-A42U-13	KIRP	MIR140	hsa-mir-140	chr16	+	3p	69933178	NA	flanking-3	3p	NA	NA	16	A	AC	1016.4	1573.95	271	0.131802	1	0.091824	0.926838	0.0329962	0.0688081	0.065048
TCGA-D8-A1JG-01B-11R-A13P-13	BRCA	MIR140	hsa-mir-140	chr16	+	3p	69933099	COSN23014990	flanking-5	3p	NA	NA	-4	C	T	492.75	912.281	1073	0.100198	1	0.0502283	0.95994	0.0177557	0.113461	0.110009
TCGA-Q1-A73O-01A-11R-A32K-13	CESC	MIR141	hsa-mir-141	chr12	+	3p	6964154	COSN16129757	loop	3p	NA	20	NA	C	G	688.806	1056.44	303	7.04876e-67	3.77109e-64	-1.29818	0.194225	0.711696	0.0396044	0.209659
TCGA-Q1-A73O-01A-11R-A32K-13	CESC	MIR141	hsa-mir-141	chr12	+	3p	6964154	COSN16129757	loop	5p	NA	20	NA	C	G	535.142	862.361	303	6.1694e-33	3.30063e-30	-0.777378	0.436936	0.359583	0.0382391	0.0923095
TCGA-AB-2805-03A-01T-0734-13	LAML	MIR142	hsa-mir-142	chr17	-	both	58331261	COSN4710472	seed_3p	5p	7	NA	NA	C	G	910.491	1712.19	189	4.05614e-50	2.17004e-47	1.49914	0.133837	0.873425	0.361856	0.194718
TCGA-AB-2807-03A-01T-0734-13	LAML	MIR142	hsa-mir-142	chr17	-	both	58331264	COSN187665	seed_3p	5p	4	NA	NA	T	C	1420.92	1712.19	189	1.28476e-48	6.87344e-46	1.45969	0.144376	0.840504	0.357457	0.194718
TCGA-FA-A4BB-01A-11R-A31S-13	DLBC	MIR142	hsa-mir-142	chr17	-	both	58331260	COSN4769864	seed_3p	3p	8	NA	NA	A	G	18386.4	22770.1	39	1.95247e-10	1.04457e-07	-1.37547	0.168986	0.77215	0.0249229	0.105793
TCGA-EW-A1IX-01A-12R-A143-13	BRCA	MIR142	hsa-mir-142	chr17	-	both	58331303	COSN23015190	non-seed duplex_5p	3p	1	NA	NA	G	T	1045.83	2059.48	1073	6.48193e-215	3.46783e-212	-1.2215	0.221896	0.653851	0.0233298	0.10814
TCGA-EW-A1IX-01A-12R-A143-13	BRCA	MIR142	hsa-mir-142	chr17	-	both	58331303	COSN23015190	non-seed duplex_5p	5p	1	NA	NA	G	T	39.7638	140.132	915	1.00909e-165	5.39864e-163	-1.13058	0.258231	0.587991	0.0773577	0.212641
TCGA-FF-A7CW-01A-11R-A38N-13	DLBC	MIR142	hsa-mir-142	chr17	-	both	58331239	NA	flanking-3	3p	NA	NA	6	C	T	26887.7	22752.8	39	5.18547e-08	2.77423e-05	-1.08265	0.278965	0.55445	0.0422326	0.105871
TCGA-FF-8041-01A-11R-2212-13	DLBC	MIR142	hsa-mir-142	chr17	-	both	58331260	COSN4769864	seed_3p	3p	8	NA	NA	A	G	13807.2	22770.1	39	7.5247e-05	0.0402571	0.710802	0.477207	0.321293	0.147585	0.105793
TCGA-DK-A1AC-01A-11R-A13X-13	BLCA	MIR142	hsa-mir-142	chr17	-	both	58331272	COSN513890	loop	5p	NA	11	NA	C	T	161.211	124.579	363	3.22401e-33	1.72485e-30	0.699119	0.484477	0.314726	0.248256	0.176631
TCGA-FF-8041-01A-11R-2212-13	DLBC	MIR142	hsa-mir-142	chr17	-	both	58331260	COSN4769864	seed_3p	5p	8	NA	NA	A	G	569.447	830.857	39	0.024329	1	-0.375564	0.707241	0.150432	0.140553	0.165337
TCGA-FA-A4BB-01A-11R-A31S-13	DLBC	MIR142	hsa-mir-142	chr17	-	both	58331260	COSN4769864	seed_3p	5p	8	NA	NA	A	G	917.412	830.857	39	0.114433	1	-0.258719	0.795852	0.0991675	0.148264	0.165337
TCGA-GS-A9TT-01A-11R-A38N-13	DLBC	MIR142	hsa-mir-142	chr17	-	both	58331234	NA	flanking-3	5p	NA	NA	11	C	T	409.684	830.857	39	0.252752	1	0.185961	0.852475	0.0693183	0.177608	0.165337
TCGA-DK-A1AC-01A-11R-A13X-13	BLCA	MIR142	hsa-mir-142	chr17	-	both	58331272	COSN513890	loop	3p	NA	11	NA	C	T	4338.03	1435.43	405	0.000358966	0.192047	0.178841	0.858062	0.0664811	0.111544	0.102177
TCGA-AB-2805-03A-01T-0734-13	LAML	MIR142	hsa-mir-142	chr17	-	both	58331261	COSN4710472	seed_3p	3p	7	NA	NA	C	G	80333.3	82854.4	189	0.0506954	1	-0.143053	0.886249	0.0524444	0.162408	0.177474
TCGA-AB-2807-03A-01T-0734-13	LAML	MIR142	hsa-mir-142	chr17	-	both	58331264	COSN187665	seed_3p	3p	4	NA	NA	T	C	97090	82823.3	189	0.0833464	1	0.126628	0.899235	0.0461269	0.191966	0.178492
TCGA-FF-A7CW-01A-11R-A38N-13	DLBC	MIR142	hsa-mir-142	chr17	-	both	58331239	NA	flanking-3	5p	NA	NA	6	C	T	982.458	830.857	39	0.54178	1	0.0985866	0.921466	0.0355205	0.171842	0.165337
TCGA-D1-A174-01A-11R-A12H-13	UCEC	MIR143	hsa-mir-143	chr5	+	3p	149428924	NA	flanking-5	3p	NA	NA	-20	C	A	79087.7	92715.9	523	3.93248e-53	2.10388e-50	-0.754599	0.45049	0.346315	0.0670036	0.159776
TCGA-55-8205-01A-11H-2240-13	LUAD	MIR143	hsa-mir-143	chr5	+	3p	149428971	NA	loop	5p	NA	6	NA	G	T	81.9003	92.7685	474	6.21828e-39	3.32678e-36	-0.658136	0.510451	0.292046	0.0549333	0.098908
TCGA-D1-A174-01A-11R-A12H-13	UCEC	MIR143	hsa-mir-143	chr5	+	3p	149428924	NA	flanking-5	5p	NA	NA	-20	C	A	61.9689	118.037	505	1.64278e-23	8.7889e-21	-0.467875	0.639874	0.193906	0.0669951	0.0932252
TCGA-55-8205-01A-11H-2240-13	LUAD	MIR143	hsa-mir-143	chr5	+	3p	149428971	NA	loop	3p	NA	6	NA	G	T	128700	103656	509	3.43241e-07	0.000183634	0.229002	0.818868	0.0867863	0.15557	0.134149
TCGA-XF-A9T8-01A-11R-A39B-13	BLCA	MIR144	hsa-mir-144	chr17	-	both	28861531	NA	flanking-3	5p	NA	NA	17	C	A	25.4589	106.656	311	2.86448e-170	1.5325e-167	3.33671	0.000847779	3.07172	0.163117	0.0643281
TCGA-OR-A5J5-01A-11R-A29W-13	ACC	MIR144	hsa-mir-144	chr17	-	both	28861543	NA	flanking-3	5p	NA	NA	5	G	A	27.8735	180.238	75	1.21422e-08	6.49605e-06	-0.740094	0.459243	0.337958	0.0550567	0.0818265
TCGA-D3-A3C3-06A-12R-A18V-13	SKCM	MIR144	hsa-mir-144	chr17	-	both	28861615	NA	flanking-5	5p	NA	NA	-11	C	T	41.1908	86.599	220	0.584389	1	-0.0369325	0.970539	0.0129871	0.0907005	0.0967649
TCGA-AP-A0LS-01A-11R-A14C-13	UCEC	MIR1468	hsa-mir-1468	chrX	-	5p	63786098	NA	flanking-5	5p	NA	NA	-23	TC	T	25.9185	26.1086	99	9.62259e-20	5.14809e-17	1.14929	0.250435	0.601305	0.254971	0.154493
TCGA-CS-5390-01A-02R-1469-13	LGG	MIR146A	hsa-mir-146a	chr5	+	5p	160485429	COSN8635147	non-seed duplex_3p	5p	22	NA	NA	G	C	47.0137	66.6633	425	1.27734e-71	6.83376e-69	-1.06178	0.288333	0.540105	0.0946476	0.185414
TCGA-DX-A8BR-01A-11R-A41D-13	SARC	MIR146A	hsa-mir-146a	chr5	+	5p	160485446	NA	flanking-3	5p	NA	NA	17	A	C	39.7518	114.348	156	1.82487e-11	9.76306e-09	-0.580696	0.561445	0.250693	0.131042	0.176634
TCGA-D5-6928-01A-11H-1927-13	COAD	MIR146A	hsa-mir-146a	chr5	+	5p	160485354	NA	flanking-5	5p	NA	NA	-18	G	A	350.885	337.756	433	4.46612e-05	0.0238938	0.198189	0.842897	0.0742253	0.152099	0.138282
TCGA-BR-8361-01A-11R-2343-13	STAD	MIR147B	hsa-mir-147b	chr15	+	3p	45433140	NA	flanking-3	3p	NA	NA	22	AT	A	67.401	37.8493	24	9.25296e-05	0.0495033	-0.964356	0.334867	0.475127	0.214903	0.317329
TCGA-HF-7133-01A-11R-2055-13	STAD	MIR148A	hsa-mir-148a	chr7	-	3p	25949900	NA	flanking-3	5p	NA	NA	22	T	G	73.1122	82.7755	328	9.60105e-97	5.13656e-94	1.6697	0.0949782	1.02238	0.404425	0.215145
TCGA-G4-6586-01A-11H-1773-13	COAD	MIR148A	hsa-mir-148a	chr7	-	3p	25949904	NA	flanking-3	3p	NA	NA	18	C	T	29521.6	58686.4	433	8.16894e-78	4.37038e-75	1.11383	0.265354	0.576174	0.371281	0.212622
TCGA-CV-5443-01A-01R-1513-13	HNSC	MIR148A	hsa-mir-148a	chr7	-	3p	25949998	NA	flanking-5	3p	NA	NA	-17	C	T	96421.6	30524.6	519	1.77172e-83	9.47868e-81	1.02988	0.303065	0.518465	0.505315	0.310931
TCGA-04-1347-01A-01R-1564-13	OV	MIR148A	hsa-mir-148a	chr7	-	3p	25949900	NA	flanking-3	5p	NA	NA	22	T	G	42.9367	82.6388	369	8.80815e-60	4.71236e-57	1.02898	0.303488	0.517859	0.471429	0.310841
TCGA-HF-7133-01A-11R-2055-13	STAD	MIR148A	hsa-mir-148a	chr7	-	3p	25949900	NA	flanking-3	3p	NA	NA	22	T	G	39025.5	39125.7	423	2.65296e-57	1.41934e-54	0.909514	0.363079	0.439999	0.422247	0.270327
TCGA-CV-5443-01A-01R-1513-13	HNSC	MIR148A	hsa-mir-148a	chr7	-	3p	25949998	NA	flanking-5	5p	NA	NA	-17	C	T	113.287	67.8001	373	4.31218e-22	2.30701e-19	0.533856	0.593441	0.226622	0.290467	0.224816
TCGA-04-1347-01A-01R-1564-13	OV	MIR148A	hsa-mir-148a	chr7	-	3p	25949900	NA	flanking-3	3p	NA	NA	22	T	G	3904.37	7428.5	488	8.3312e-19	4.45719e-16	0.417791	0.6761	0.169989	0.288537	0.223718
TCGA-G4-6586-01A-11H-1773-13	COAD	MIR148A	hsa-mir-148a	chr7	-	3p	25949904	NA	flanking-3	5p	NA	NA	18	C	T	52.8838	130.037	419	2.03974e-10	1.09126e-07	0.318487	0.750116	0.124872	0.247099	0.210194
TCGA-CV-7427-01A-11R-2080-13	HNSC	MIR148B	hsa-mir-148b	chr12	+	3p	54337215	NA	flanking-5	3p	NA	NA	-25	C	T	307.952	281.301	519	4.6815e-81	2.5046e-78	-1.00841	0.313259	0.504096	0.0597096	0.140167
TCGA-AX-A3FT-01A-11R-A22I-13	UCEC	MIR148B	hsa-mir-148b	chr12	+	3p	54337228	NA	flanking-5	3p	NA	NA	-12	G	T	219.808	590.496	523	1.22459e-67	6.55155e-65	-0.884753	0.37629	0.424478	0.0713142	0.142144
TCGA-OR-A5KZ-01A-11R-A29W-13	ACC	MIR149	hsa-mir-149	chr2	+	5p	240456086	NA	flanking-3	5p	NA	NA	10	T	C	160.85	119.278	64	3.53911e-14	1.89342e-11	-1.21683	0.223668	0.650397	0.0623558	0.170588
TCGA-OR-A5K1-01A-11R-A29W-13	ACC	MIR149	hsa-mir-149	chr2	+	5p	240456086	NA	flanking-3	5p	NA	NA	10	T	C	120.452	119.278	64	0.221813	1	0.154241	0.87742	0.0567926	0.184307	0.170588
TCGA-AA-3949-01A-01T-1021-13	COAD	MIR150	hsa-mir-150	chr19	-	5p	49500856	NA	flanking-5	5p	NA	NA	-3	G	T	385.198	655.753	433	7.36498e-104	3.94026e-101	1.39846	0.161975	0.790551	0.28358	0.147116
TCGA-ET-A25J-01A-11R-A16Q-13	THCA	MIR152	hsa-mir-152	chr17	-	3p	48037240	NA	flanking-5	3p	NA	NA	-8	G	A	862.766	615.59	509	0.091896	1	0.0748491	0.940335	0.0267175	0.102599	0.0973134
TCGA-VQ-A94O-01A-11R-A415-13	STAD	MIR155	hsa-mir-155	chr21	+	5p	25574065	NA	flanking-3	5p	NA	NA	22	C	A	515.054	631.883	423	3.05797e-46	1.63601e-43	-0.787618	0.43092	0.365603	0.0436121	0.0801448
TCGA-18-5595-01A-01T-1634-13	LUSC	MIR155	hsa-mir-155	chr21	+	5p	25573966	NA	flanking-5	5p	NA	NA	-17	C	T	176.234	668.652	466	2.51828e-42	1.34728e-39	-0.700723	0.483476	0.315625	0.0455335	0.0777021
TCGA-DK-A1A3-01A-11R-A13X-13	BLCA	MIR155	hsa-mir-155	chr21	+	5p	25574025	COSN2376761	seed_3p	5p	4	NA	NA	C	T	240.569	623.568	404	9.23147e-37	4.93884e-34	-0.698844	0.48465	0.314572	0.0544743	0.087481
TCGA-A6-3809-01A-01T-1021-13	COAD	MIR15A	hsa-mir-15a	chr13	-	5p	50049206	NA	flanking-5	5p	NA	NA	-18	AT	A	129.765	174.796	431	4.15417e-44	2.22248e-41	-0.754842	0.450344	0.346456	0.0942806	0.168481
TCGA-A6-6653-01A-11H-1773-13	COAD	MIR15A	hsa-mir-15a	chr13	-	5p	50049206	NA	flanking-5	5p	NA	NA	-18	A	AT	140.816	174.796	431	4.03213e-25	2.15719e-22	0.531813	0.594855	0.225589	0.220758	0.168481
TCGA-ZB-A966-01A-11R-A42U-13	THYM	MIR15A	hsa-mir-15a	chr13	-	5p	50049206	NA	flanking-5	5p	NA	NA	-18	AT	A	408.804	866.56	123	8.25979e-06	0.00441899	0.419857	0.67459	0.17096	0.147338	0.117076
TCGA-F4-6856-01A-11H-1927-13	COAD	MIR15A	hsa-mir-15a	chr13	-	5p	50049206	NA	flanking-5	5p	NA	NA	-18	A	AT	71.8112	174.796	431	5.32255e-09	2.84756e-06	-0.286981	0.774127	0.111188	0.140271	0.168481
TCGA-AX-A05S-01A-11R-A00W-13	UCEC	MIR15A	hsa-mir-15a	chr13	-	5p	50049206	NA	flanking-5	5p	NA	NA	-18	AT	A	168.868	192.538	522	0.00440919	1	-0.12517	0.900389	0.0455697	0.172287	0.18726
TCGA-66-2791-01A-01T-0981-13	LUSC	MIR15B	hsa-mir-15b	chr3	+	5p	160404673	NA	flanking-3	5p	NA	NA	7	T	C	119.824	303.399	466	3.80175e-103	2.03394e-100	1.31059	0.189997	0.721254	0.167626	0.0893516
TCGA-66-2791-01A-01T-0981-13	LUSC	MIR15B	hsa-mir-15b	chr3	+	5p	160404673	NA	flanking-3	3p	NA	NA	7	T	C	32.2381	88.0277	454	4.19588e-56	2.24479e-53	0.855708	0.392159	0.406537	0.228226	0.149672
TCGA-A2-A0SU-01A-11R-A085-13	BRCA	MIR15B	hsa-mir-15b	chr3	+	5p	160404598	NA	flanking-5	5p	NA	NA	-9	A	T	72.4671	246.73	1072	0.0014457	0.773448	0.0975424	0.922296	0.0351298	0.130466	0.121392
TCGA-G4-6588-01A-11H-1773-13	COAD	MIR17	hsa-mir-17	chr13	+	5p	91350602	NA	flanking-5	3p	NA	NA	-16	CCA	C	423.587	499.906	432	7.18477e-41	3.84385e-38	0.717718	0.472931	0.325202	0.165022	0.119828
TCGA-CM-5341-01A-01T-1409-13	COAD	MIR17	hsa-mir-17	chr13	+	5p	91350688	NA	flanking-3	3p	NA	NA	12	C	G	546.728	499.906	432	1.06281e-22	5.68606e-20	-0.499678	0.617302	0.209502	0.0883634	0.119828
TCGA-G4-6588-01A-11H-1773-13	COAD	MIR17	hsa-mir-17	chr13	+	5p	91350602	NA	flanking-5	5p	NA	NA	-16	CCA	C	1079.04	943.747	432	2.32505e-13	1.2439e-10	-0.364097	0.715786	0.145217	0.0621273	0.0790823
TCGA-CM-5341-01A-01T-1409-13	COAD	MIR17	hsa-mir-17	chr13	+	5p	91350688	NA	flanking-3	5p	NA	NA	12	C	G	997.818	943.747	432	6.56822e-08	3.514e-05	-0.264554	0.791353	0.10163	0.0667627	0.0790823
TCGA-D8-A1XK-01A-21R-A14L-13	BRCA	MIR181C	hsa-mir-181c	chr19	+	5p	13874754	COSN23015345	loop	5p	NA	8	NA	G	A	46.1114	100.502	1023	3.84669e-265	2.05798e-262	1.50571	0.132143	0.878957	0.407124	0.233073
TCGA-D8-A1XK-01A-21R-A14L-13	BRCA	MIR181C	hsa-mir-181c	chr19	+	5p	13874754	COSN23015345	loop	3p	NA	8	NA	G	A	88.2261	110.739	1034	8.37141e-209	4.47871e-206	1.22891	0.219105	0.659347	0.354395	0.215751
TCGA-39-5036-01A-01T-1442-13	LUSC	MIR181D	hsa-mir-181d	chr19	+	5p	13874992	NA	flanking-3	5p	NA	NA	19	G	T	21.2718	72.1407	267	4.39326e-05	0.0235039	-0.254264	0.799291	0.0972949	0.207536	0.242983
TCGA-AA-A01R-01A-21R-A082-13	COAD	MIR182	hsa-mir-182	chr7	-	5p	129770388	NA	flanking-3	5p	NA	NA	18	G	A	7554.48	13723.4	433	3.90822e-139	2.0909e-136	1.81726	0.0691769	1.16004	0.341778	0.154963
TCGA-EE-A3J5-06A-11R-A20E-13	SKCM	MIR182	hsa-mir-182	chr7	-	5p	129770412	COSN5029509	non-seed duplex_3p	5p	15	NA	NA	G	A	663.584	2888.08	449	8.88516e-84	4.75356e-81	-1.14639	0.251634	0.59923	0.0365186	0.188602
TCGA-ZN-A9VQ-01A-11R-A404-13	MESO	MIR182	hsa-mir-182	chr7	-	5p	129770387	NA	flanking-3	5p	NA	NA	19	C	T	17640.6	12051.3	86	2.89183e-16	1.54713e-13	-1.0917	0.274964	0.560725	0.0221608	0.143608
TCGA-93-8067-01A-11H-2286-13	LUAD	MIR182	hsa-mir-182	chr7	-	5p	129770392	NA	flanking-3	5p	NA	NA	14	G	A	27247.9	23571.1	509	1.40938e-67	7.54018e-65	-0.900232	0.367997	0.434156	0.0473849	0.123843
TCGA-EO-A3AU-01A-21R-A19V-13	UCEC	MIR182	hsa-mir-182	chr7	-	5p	129770491	NA	flanking-5	5p	NA	NA	-21	TC	T	17952.2	23158.3	523	6.4007e-60	3.42437e-57	-0.816002	0.414499	0.382476	0.0443857	0.130668
TCGA-D1-A17T-01A-11R-A12H-13	UCEC	MIR185	hsa-mir-185	chr22	+	5p	20033146	NA	flanking-5	5p	NA	NA	-7	G	T	34.948	90.7173	514	2.90946e-142	1.55656e-139	1.58558	0.112835	0.947555	0.203358	0.105165
TCGA-D8-A1JB-01A-11R-A13P-13	BRCA	MIR185	hsa-mir-185	chr22	+	5p	20033224	NA	flanking-3	5p	NA	NA	15	A	T	48.7514	86.2769	1057	4.32521e-173	2.31399e-170	-1.05164	0.292966	0.533182	0.0382215	0.0998553
TCGA-XF-A9SM-01A-11R-A42V-13	BLCA	MIR185	hsa-mir-185	chr22	+	5p	20033213	NA	flanking-3	5p	NA	NA	4	C	T	133.74	97.1083	392	5.88551e-51	3.14875e-48	-0.882716	0.37739	0.42321	0.0335768	0.0714312
TCGA-H9-7775-01A-11R-2117-13	PRAD	MIR185	hsa-mir-185	chr22	+	5p	20033226	NA	flanking-3	5p	NA	NA	17	C	G	22.5222	32.107	269	3.23195e-06	0.00172909	0.289967	0.771841	0.112472	0.117881	0.102348
TCGA-AA-3492-01A-01T-1409-13	COAD	MIR186	hsa-mir-186	chr1	-	5p	71067644	COSN18162915	non-seed duplex_3p	5p	20	NA	NA	CA	C	184.236	370.406	433	8.54852e-105	4.57346e-102	1.40899	0.158839	0.799043	0.260366	0.148727
TCGA-MI-A75C-01A-11R-A32J-13	LIHC	MIR186	hsa-mir-186	chr1	-	5p	71067697	COSN16303119	seed_5p	5p	6	NA	NA	T	A	163.93	350.519	369	0.00018205	0.0973966	-0.196842	0.843951	0.0736827	0.145346	0.165825
TCGA-UT-A88E-01B-11R-A404-13	MESO	MIR191	hsa-mir-191	chr3	-	5p	49020659	NA	loop	5p	NA	13	NA	G	A	396.264	406.823	86	2.20527e-16	1.17982e-13	-1.09801	0.272198	0.565115	0.0347148	0.127894
TCGA-DD-AACM-01A-11R-A41H-13	LIHC	MIR191	hsa-mir-191	chr3	-	5p	49020611	NA	flanking-3	5p	NA	NA	20	G	T	912.58	625.25	369	2.11488e-33	1.13146e-30	0.694632	0.487286	0.312216	0.179876	0.127536
TCGA-AX-A1C5-01A-11R-A136-13	UCEC	MIR191	hsa-mir-191	chr3	-	5p	49020612	NA	flanking-3	5p	NA	NA	19	C	T	1458.89	1287.72	523	1.99057e-09	1.06496e-06	-0.267017	0.789456	0.102672	0.106357	0.128172
TCGA-A3-3387-01A-01R-1540-13	KIRC	MIR192	hsa-mir-192	chr11	-	5p	64891164	COSN2377058	non-seed duplex_3p	5p	17	NA	NA	A	G	2872.26	8942.12	499	1.04455e-30	5.58833e-28	0.552365	0.580698	0.236049	0.172425	0.132414
TCGA-D1-A1NZ-01A-21R-A14C-13	UCEC	MIR192	hsa-mir-192	chr11	-	5p	64891144	NA	flanking-3	5p	NA	NA	15	T	C	2021.37	1896.37	523	1.23493e-05	0.00660686	0.193001	0.846958	0.0721382	0.141318	0.126671
TCGA-AN-A0FL-01A-11R-A035-13	BRCA	MIR193A	hsa-mir-193a	chr17	+	both	31560083	NA	flanking-3	5p	NA	NA	12	G	T	102.078	474.929	1073	3.83898e-88	2.05385e-85	-0.66848	0.503827	0.297719	0.0379015	0.121039
TCGA-KL-8326-01A-11R-2314-13	KICH	MIR193B	hsa-mir-193b	chr16	+	3p	14303955	NA	flanking-5	3p	NA	NA	-25	C	CT	110.091	42.8914	36	2.73956e-09	1.46566e-06	-1.31668	0.187948	0.725963	0.0527446	0.107967
TCGA-AN-A0XW-01A-11R-A108-13	BRCA	MIR193B	hsa-mir-193b	chr16	+	3p	14303989	COSN23014894	non-seed duplex_5p	3p	10	NA	NA	G	C	72.1709	169.753	1051	5.47784e-116	2.93065e-113	-0.804387	0.421173	0.375539	0.0844774	0.145419
TCGA-ER-A19H-06A-12R-A18V-13	SKCM	MIR193B	hsa-mir-193b	chr16	+	3p	14303982	COSN5027646	seed_5p	3p	3	NA	NA	G	A	91.5447	152.753	413	0.00131259	0.702234	0.159205	0.873507	0.0587335	0.18833	0.162925
TCGA-29-1762-01A-01R-1567-13	OV	MIR195	hsa-mir-195	chr17	-	5p	7017648	COSN518969	seed_3p	3p	2	NA	NA	G	C	30.6541	49.8502	101	3.91665e-25	2.09541e-22	-1.3849	0.166083	0.779675	0.0870725	0.301427
TCGA-YG-AA3O-06A-11R-A38N-13	SKCM	MIR196B	hsa-mir-196b	chr7	-	5p	27169565	NA	flanking-5	5p	NA	NA	-16	C	T	115.453	573.489	430	2.7859e-66	1.49046e-63	-0.995831	0.319332	0.495757	0.0492627	0.152626
TCGA-64-5779-01A-01T-1627-13	LUAD	MIR196B	hsa-mir-196b	chr7	-	5p	27169521	COSN24409123	loop	5p	NA	7	NA	G	T	137.908	156.649	257	6.31442e-14	3.37821e-11	-0.495383	0.62033	0.207378	0.0811015	0.123834
TCGA-EE-A17X-06A-11R-A18V-13	SKCM	MIR197	hsa-mir-197	chr1	+	3p	109598948	COSN5026096	non-seed duplex_3p	3p	9	NA	NA	C	A	336.103	1252.62	449	1.2466e-52	6.66932e-50	0.82585	0.408889	0.388394	0.298843	0.149821
TCGA-DK-A1AB-01A-11R-A13X-13	BLCA	MIR197	hsa-mir-197	chr1	+	3p	109598984	NA	flanking-3	3p	NA	NA	23	C	T	152.79	391.985	405	1.40198e-11	7.5006e-09	-0.345733	0.729543	0.136949	0.0749297	0.100655
TCGA-AJ-A8CV-01A-11R-A37P-13	UCEC	MIR197	hsa-mir-197	chr1	+	3p	109598937	NA	loop	3p	NA	14	NA	C	T	696.871	677.916	523	0.247587	1	0.050615	0.959632	0.0178951	0.10455	0.10105
TCGA-G3-A25T-01A-11R-A16S-13	LIHC	MIR200A	hsa-mir-200a	chr1	+	3p	1167904	COSN16303208	loop	5p	NA	5	NA	C	G	1348.69	137.048	221	2.80066e-48	1.49836e-45	-1.27791	0.201281	0.696198	0.0495362	0.13462
TCGA-G2-A3IE-01A-11R-A20E-13	BLCA	MIR200A	hsa-mir-200a	chr1	+	3p	1167903	COSN513603	loop	5p	NA	4	NA	C	T	763.771	431.171	397	2.08605e-75	1.11604e-72	-1.15963	0.2462	0.608712	0.0342333	0.100763
TCGA-R6-A6XG-01B-11R-A337-13	ESCA	MIR200A	hsa-mir-200a	chr1	+	3p	1167908	NA	loop	3p	NA	9	NA	C	T	3468	698.073	178	8.19234e-29	4.3829e-26	-1.00676	0.314051	0.502999	0.0782079	0.203163
TCGA-G2-A3IE-01A-11R-A20E-13	BLCA	MIR200A	hsa-mir-200a	chr1	+	3p	1167903	COSN513603	loop	3p	NA	4	NA	C	T	621.12	226.556	373	8.6275e-53	4.61571e-50	0.93498	0.349798	0.456182	0.295469	0.190932
TCGA-ED-A459-01A-11R-A25Z-13	LIHC	MIR200A	hsa-mir-200a	chr1	+	3p	1167893	COSN16303181	non-seed duplex_5p	5p	16	NA	NA	T	A	29.9667	139.771	221	2.44061e-21	1.30573e-18	-0.710055	0.47767	0.320872	0.0871352	0.134437
TCGA-R6-A6XG-01B-11R-A337-13	ESCA	MIR200A	hsa-mir-200a	chr1	+	3p	1167908	NA	loop	5p	NA	9	NA	C	T	5439.24	1066.07	180	7.67126e-05	0.0410413	-0.30174	0.762851	0.11756	0.0724902	0.087363
TCGA-G3-A25T-01A-11R-A16S-13	LIHC	MIR200A	hsa-mir-200a	chr1	+	3p	1167904	COSN16303208	loop	3p	NA	5	NA	C	G	1162.14	100.745	188	0.0102764	1	0.18909	0.850023	0.0705695	0.284286	0.256607
TCGA-2G-AAG3-01A-11R-A439-13	TGCT	MIR200C	hsa-mir-200c	chr12	+	3p	6963698	NA	flanking-5	3p	NA	NA	-5	G	A	2660.96	4352.02	154	9.71706e-15	5.19863e-12	-0.69168	0.489138	0.310568	0.0503086	0.0924927
TCGA-EE-A2MD-06A-11R-A18W-13	SKCM	MIR204	hsa-mir-204	chr9	-	5p	70810071	NA	flanking-5	5p	NA	NA	-19	G	A	242.938	238.893	305	6.933e-48	3.70916e-45	1.00155	0.31656	0.499544	0.443961	0.286325
TCGA-18-5595-01A-01T-1634-13	LUSC	MIR205	hsa-mir-205	chr1	+	5p	209432167	COSN2378349	seed_5p	5p	2	NA	NA	C	T	121680	16247.9	465	9.68207e-71	5.17991e-68	0.987974	0.323166	0.490575	0.230974	0.152329
TCGA-FU-A2QG-01A-11R-A18L-13	CESC	MIR205	hsa-mir-205	chr1	+	5p	209432167	COSN2378349	seed_5p	5p	2	NA	NA	C	T	24889.8	15495.3	302	5.40895e-33	2.89379e-30	0.779892	0.435454	0.361057	0.218843	0.158505
TCGA-XU-A930-01A-11R-A42W-13	THYM	MIR205	hsa-mir-205	chr1	+	5p	209432227	NA	flanking-3	5p	NA	NA	4	A	AGG	45827.4	21810.2	123	3.06813e-14	1.64145e-11	-0.776305	0.437569	0.358954	0.068201	0.144268
TCGA-VR-A8EW-01A-11R-A36E-13	ESCA	MIR205	hsa-mir-205	chr1	+	5p	209432147	NA	flanking-5	5p	NA	NA	-19	AAT	A	6480	14274.2	160	3.74211e-11	2.00203e-08	-0.561978	0.574131	0.240989	0.102641	0.172626
TCGA-XV-A9W5-01A-11R-A38N-13	SKCM	MIR205	hsa-mir-205	chr1	+	5p	209432167	COSN2378349	seed_5p	5p	2	NA	NA	C	T	517.12	1910.5	127	0.0861718	1	-0.153467	0.87803	0.0564905	0.280013	0.316059
TCGA-A6-6653-01A-11H-1773-13	COAD	MIR20A	hsa-mir-20a	chr13	+	5p	91351125	COSN23012485	non-seed duplex_3p	5p	18	NA	NA	T	TA	300.774	487.812	433	3.12382e-30	1.67124e-27	-0.593667	0.552735	0.257483	0.0430761	0.0672195
TCGA-ZF-AA56-01A-31R-A39B-13	BLCA	MIR20A	hsa-mir-20a	chr13	+	5p	91351142	NA	flanking-3	5p	NA	NA	13	T	C	399.992	417.781	403	2.789e-23	1.49212e-20	-0.527549	0.597813	0.223435	0.0388244	0.0557808
TCGA-BL-A3JM-01A-12R-A21E-13	BLCA	MIR20A	hsa-mir-20a	chr13	+	5p	91351118	COSN513764	non-seed duplex_3p	5p	11	NA	NA	G	C	474.79	417.781	403	4.05655e-18	2.17025e-15	-0.453598	0.650118	0.187008	0.0412013	0.0557808
TCGA-DD-AAE7-01A-11R-A41H-13	LIHC	MIR20A	hsa-mir-20a	chr13	+	5p	91351103	NA	loop	5p	NA	9	NA	T	C	392.92	805.792	369	3.07763e-05	0.0164653	-0.219696	0.826108	0.0829634	0.0424528	0.0486674
TCGA-QF-A5YS-01A-11R-A31S-13	UCEC	MIR20B	hsa-mir-20b	chrX	-	5p	134169794	NA	flanking-3	5p	NA	NA	19	G	T	55.505	113.186	290	0.00269211	1	-0.177754	0.858916	0.0660494	0.0810475	0.0905447
TCGA-XF-AAN3-01A-11R-A42V-13	BLCA	MIR21	hsa-mir-21	chr17	+	5p	59841300	NA	loop	3p	NA	6	NA	G	A	1086.04	3191.65	403	3.15453e-81	1.68767e-78	1.21419	0.224673	0.648448	0.281573	0.162156
TCGA-XF-AAN3-01A-11R-A42V-13	BLCA	MIR21	hsa-mir-21	chr17	+	5p	59841300	NA	loop	5p	NA	6	NA	G	A	254489	255347	403	6.05261e-24	3.23815e-21	-0.536618	0.591532	0.228022	0.0441115	0.0644941
TCGA-98-A538-01A-11H-A263-13	LUSC	MIR21	hsa-mir-21	chr17	+	5p	59841267	NA	flanking-5	5p	NA	NA	-6	G	T	288206	310597	466	1.66607e-26	8.91349e-24	-0.52557	0.599187	0.222437	0.0437643	0.0659705
TCGA-BT-A42F-01A-11R-A23X-13	BLCA	MIR21	hsa-mir-21	chr17	+	5p	59841300	NA	loop	3p	NA	6	NA	G	C	7087.64	3191.65	403	1.67463e-19	8.95925e-17	0.474098	0.63543	0.196932	0.208784	0.162156
TCGA-98-A538-01A-11H-A263-13	LUSC	MIR21	hsa-mir-21	chr17	+	5p	59841267	NA	flanking-5	3p	NA	NA	-6	G	T	6001.25	4662.27	466	1.15471e-18	6.17772e-16	-0.426471	0.669764	0.174078	0.110835	0.149241
TCGA-CV-6942-01A-21R-2015-13	HNSC	MIR21	hsa-mir-21	chr17	+	5p	59841249	NA	flanking-5	3p	NA	NA	-24	C	G	6524.89	6570.78	519	4.07103e-14	2.178e-11	0.341325	0.732859	0.13498	0.159606	0.130445
TCGA-VS-A959-01A-11R-A42V-13	CESC	MIR21	hsa-mir-21	chr17	+	5p	59841322	COSN8603510	non-seed duplex_3p	5p	12	NA	NA	G	A	380274	326240	303	8.26969e-06	0.00442429	-0.260604	0.794398	0.0999617	0.052885	0.0639991
TCGA-FA-A6HN-01A-11R-A31S-13	DLBC	MIR21	hsa-mir-21	chr17	+	5p	59841260	NA	flanking-5	5p	NA	NA	-13	C	G	369480	423973	46	0.351945	1	0.13868	0.889703	0.050755	0.106752	0.0981852
TCGA-BT-A42F-01A-11R-A23X-13	BLCA	MIR21	hsa-mir-21	chr17	+	5p	59841300	NA	loop	5p	NA	6	NA	G	C	431239	255347	403	0.009106	1	0.130549	0.896132	0.0476281	0.0694529	0.0644941
TCGA-VS-A959-01A-11R-A42V-13	CESC	MIR21	hsa-mir-21	chr17	+	5p	59841322	COSN8603510	non-seed duplex_3p	3p	12	NA	NA	G	A	4656.92	4337.71	303	0.118485	1	0.0899426	0.928333	0.0322963	0.159548	0.15074
TCGA-CV-6942-01A-21R-2015-13	HNSC	MIR21	hsa-mir-21	chr17	+	5p	59841249	NA	flanking-5	5p	NA	NA	-24	C	G	426106	314546	519	0.843704	1	-0.00865861	0.993092	0.00301073	0.0856804	0.0862035
TCGA-HF-7136-01A-11R-2055-13	STAD	MIR217	hsa-mir-217	chr2	-	5p	55982979	NA	flanking-3	5p	NA	NA	5	C	A	54.2139	74.7038	298	3.05633e-48	1.63513e-45	1.02341	0.306112	0.514119	0.213199	0.135602
TCGA-90-A4ED-01A-31H-A25B-13	LUSC	MIR22	hsa-mir-22	chr17	-	3p	1713996	NA	flanking-5	3p	NA	NA	-23	G	A	44512.8	92647.1	466	1.39049e-148	7.4391e-146	1.8053	0.0710279	1.14857	0.0319346	0.0151077
TCGA-CM-6679-01A-11H-1838-13	COAD	MIR22	hsa-mir-22	chr17	-	3p	1713945	NA	loop	5p	NA	7	NA	C	G	34.1721	47.2347	254	4.01027e-36	2.1455e-33	-0.928598	0.353097	0.452105	0.0939529	0.203611
TCGA-CM-6679-01A-11H-1838-13	COAD	MIR22	hsa-mir-22	chr17	-	3p	1713945	NA	loop	3p	NA	7	NA	C	G	56193.4	61858.3	433	2.59506e-55	1.38836e-52	-0.874202	0.382008	0.417927	0.00495033	0.0161973
TCGA-CJ-4912-01A-01R-1425-13	KIRC	MIR22	hsa-mir-22	chr17	-	3p	1713912	COSN2377436	flanking-3	3p	NA	NA	2	C	A	40913.9	68293.5	499	1.4404e-48	7.70616e-46	-0.733415	0.463305	0.334133	0.0120915	0.0376321
TCGA-FA-A86F-01A-11R-A38N-13	DLBC	MIR221	hsa-mir-221	chrX	-	3p	45746162	NA	flanking-3	3p	NA	NA	18	C	T	420.618	299.56	46	3.2062e-15	1.71531e-12	1.72242	0.0849932	1.07062	0.266942	0.126056
TCGA-BH-A5IZ-01A-11R-A27U-13	BRCA	MIR221	hsa-mir-221	chrX	-	3p	45746169	NA	flanking-3	3p	NA	NA	11	C	T	95.7377	210.016	1062	3.08871e-99	1.65246e-96	0.723796	0.469191	0.32865	0.191102	0.139476
TCGA-3C-AALK-01A-11R-A41G-13	BRCA	MIR221	hsa-mir-221	chrX	-	3p	45746225	COSN5776032	non-seed duplex_5p	3p	18	NA	NA	C	A	77.7729	210.016	1062	3.21977e-91	1.72258e-88	-0.686941	0.49212	0.307929	0.0904777	0.139476
TCGA-C5-A2LT-01A-11R-A18L-13	CESC	MIR222	hsa-mir-222	chrX	-	3p	45747065	COSN2377957	loop	3p	NA	8	NA	C	T	191.428	186.181	300	2.4931e-48	1.33381e-45	-1.01998	0.30774	0.511817	0.0970271	0.197772
TCGA-MA-AA42-01A-12R-A38M-13	CESC	MIR222	hsa-mir-222	chrX	-	3p	45747066	NA	loop	3p	NA	7	NA	G	A	208.04	186.181	300	3.50335e-42	1.87429e-39	-0.925706	0.354599	0.450263	0.106338	0.197772
TCGA-B0-5096-01A-01R-1419-13	KIRC	MIR222	hsa-mir-222	chrX	-	3p	45747065	COSN2377957	loop	3p	NA	8	NA	C	T	200.181	158.038	458	2.15331e-63	1.15202e-60	-0.92455	0.3552	0.449527	0.136557	0.239673
TCGA-CV-6955-01A-11R-2015-13	HNSC	MIR222	hsa-mir-222	chrX	-	3p	45747065	COSN2377957	loop	3p	NA	8	NA	C	T	96.8661	189.397	517	1.88787e-66	1.01001e-63	-0.88088	0.378383	0.422069	0.128807	0.225387
TCGA-CV-6955-01A-11R-2015-13	HNSC	MIR222	hsa-mir-222	chrX	-	3p	45747065	COSN2377957	loop	5p	NA	8	NA	C	T	25.6521	54.5026	205	7.23547e-23	3.87098e-20	-0.779077	0.435934	0.360579	0.153171	0.287422
TCGA-C8-A26Y-01A-11R-A16E-13	BRCA	MIR222	hsa-mir-222	chrX	-	3p	45747060	COSN23017634	loop	3p	NA	13	NA	G	A	56.808	129.328	870	2.96086e-06	0.00158406	0.159494	0.873279	0.0588467	0.268537	0.248425
TCGA-2G-AAGZ-01A-11R-A439-13	TGCT	MIR223	hsa-mir-223	chrX	+	3p	66018968	NA	flanking-3	3p	NA	NA	10	C	G	341.758	353.767	154	3.84718e-22	2.05824e-19	-0.917485	0.358889	0.44504	0.0592963	0.104847
TCGA-DI-A2QU-01A-11R-A18L-13	UCEC	MIR223	hsa-mir-223	chrX	+	3p	66018892	NA	flanking-5	3p	NA	NA	-3	C	A	144.872	405.43	519	1.00789e-68	5.39219e-66	-0.898918	0.368696	0.433331	0.0704232	0.133677
TCGA-D9-A3Z4-01A-11R-A23A-13	SKCM	MIR223	hsa-mir-223	chrX	+	3p	66018915	COSM3562771	non-seed duplex_5p	3p	21	NA	NA	T	C	92.9546	672.021	447	6.60073e-50	3.53139e-47	-0.799632	0.423924	0.372712	0.0707015	0.155701
TCGA-NC-A5HR-01A-21H-A26V-13	LUSC	MIR223	hsa-mir-223	chrX	+	3p	66018971	NA	flanking-3	3p	NA	NA	13	G	T	1245.93	636.223	465	0.0264619	1	-0.10325	0.917764	0.0372688	0.102518	0.108482
TCGA-GK-A6C7-01A-11R-A33A-13	KIRC	MIR224	hsa-mir-224	chrX	-	5p	151958656	NA	flanking-5	5p	NA	NA	-4	C	A	27.6963	77.8044	264	5.42178e-51	2.90065e-48	-1.16465	0.244161	0.612324	0.0821842	0.271841
TCGA-LN-A5U5-01A-21R-A28K-13	ESCA	MIR2355	hsa-mir-2355	chr2	-	both	207109983	NA	flanking-3	5p	NA	NA	16	T	A	32.0935	59.1597	130	7.96073e-17	4.25899e-14	-0.843042	0.399205	0.398804	0.0619155	0.118634
TCGA-EY-A1GO-01A-11R-A14C-13	UCEC	MIR2355	hsa-mir-2355	chr2	-	both	207110087	NA	flanking-5	5p	NA	NA	-24	C	G	45.5609	72.4269	469	4.43682e-40	2.3737e-37	-0.67445	0.500025	0.301008	0.0946067	0.164831
TCGA-DX-A23Y-01A-11R-A27U-13	SARC	MIR2355	hsa-mir-2355	chr2	-	both	207109977	NA	flanking-3	5p	NA	NA	22	G	A	27.8078	53.5218	194	0.045159	1	-0.144759	0.884901	0.0531053	0.12244	0.134023
TCGA-22-1012-01A-01T-1557-13	LUSC	MIR23A	hsa-mir-23a	chr19	-	3p	13836586	NA	flanking-3	3p	NA	NA	9	G	C	5734.38	5334.08	466	6.71252e-85	3.5912e-82	1.12663	0.259898	0.585197	0.229953	0.140139
TCGA-D8-A1XQ-01A-11R-A14L-13	BRCA	MIR23A	hsa-mir-23a	chr19	-	3p	13836590	COSN23015344	flanking-3	3p	NA	NA	5	C	T	4784.2	3582.12	1073	5.65309e-74	3.0244e-71	-0.601394	0.547577	0.261555	0.106325	0.16421
TCGA-EY-A548-01A-11R-A27R-13	UCEC	MIR23A	hsa-mir-23a	chr19	-	3p	13836674	NA	flanking-5	3p	NA	NA	-23	AG	A	3102.04	4100.65	523	0.0219799	1	0.100467	0.919974	0.0362245	0.165858	0.15702
TCGA-BC-A10X-01A-11R-A130-13	LIHC	MIR23B	hsa-mir-23b	chr9	+	3p	95085214	NA	flanking-5	3p	NA	NA	-13	T	TGC	2332.41	2090.12	369	1.36841e-65	7.32101e-63	-1.10157	0.27065	0.567592	0.0410295	0.134076
TCGA-A2-A0CR-01A-11R-A22I-13	BRCA	MIR23B	hsa-mir-23b	chr9	+	3p	95085309	NA	flanking-3	3p	NA	NA	22	C	T	407.669	908.737	1073	5.34713e-131	2.86071e-128	-0.859438	0.390099	0.408825	0.0656748	0.145095
TCGA-EW-A1PC-01B-11R-A21U-13	BRCA	MIR25	hsa-mir-25	chr7	-	3p	100093640	NA	flanking-5	3p	NA	NA	-10	G	T	18758.3	11512.7	1073	9.28345e-129	4.96665e-126	-0.849716	0.395483	0.402872	0.0288517	0.0752203
TCGA-24-0975-01A-02R-1565-13	OV	MIR25	hsa-mir-25	chr7	-	3p	100093602	NA	loop	3p	NA	8	NA	G	A	11616.4	20326.5	487	1.54794e-44	8.2815e-42	-0.704532	0.481101	0.317763	0.042736	0.0781598
TCGA-AX-A1C5-01A-11R-A136-13	UCEC	MIR25	hsa-mir-25	chr7	-	3p	100093626	COSN19728907	seed_5p	3p	5	NA	NA	C	T	11573.7	13495.1	523	2.57144e-39	1.37572e-36	-0.624681	0.532181	0.273941	0.0414667	0.074741
TCGA-04-1361-01A-01R-1565-13	OV	MIR25	hsa-mir-25	chr7	-	3p	100093637	NA	flanking-5	3p	NA	NA	-7	A	T	5648.5	20326.5	487	5.57025e-10	2.98009e-07	-0.286852	0.774226	0.111132	0.0637369	0.0781598
TCGA-L5-A4OU-01A-11R-A28K-13	ESCA	MIR25	hsa-mir-25	chr7	-	3p	100093647	NA	flanking-5	3p	NA	NA	-17	C	T	29086.1	12313.3	182	0.000207371	0.110944	-0.280704	0.778937	0.108498	0.0498405	0.0603746
TCGA-W3-A825-06A-11R-A358-13	SKCM	MIR25	hsa-mir-25	chr7	-	3p	100093565	NA	flanking-3	3p	NA	NA	6	G	A	14236.2	26014.5	449	0.00235431	1	-0.144361	0.885216	0.052951	0.0794727	0.104036
TCGA-DK-A1AC-01A-11R-A13X-13	BLCA	MIR25	hsa-mir-25	chr7	-	3p	100093572	COSN514173	non-seed duplex_3p	3p	21	NA	NA	C	T	22998.3	13017.1	405	0.110066	1	0.079575	0.936575	0.0284573	0.0559811	0.052954
TCGA-S9-A6TU-01A-12R-A360-13	LGG	MIR27A	hsa-mir-27a	chr19	-	3p	13836513	NA	flanking-5	3p	NA	NA	-5	C	T	749.861	575.74	527	5.73493e-150	3.06819e-147	1.62603	0.103943	0.983206	0.29611	0.139918
TCGA-AJ-A8CW-01A-11R-A37P-13	UCEC	MIR27A	hsa-mir-27a	chr19	-	3p	13836441	NA	flanking-3	3p	NA	NA	6	TG	T	1439.57	1879.09	521	7.69958e-103	4.11928e-100	-1.1993	0.230413	0.637493	0.0376663	0.159485
TCGA-AB-2935-03A-01T-0740-13	LAML	MIR27A	hsa-mir-27a	chr19	-	3p	13836478	NA	loop	3p	NA	9	NA	T	C	2761.49	3138.07	189	6.49508e-31	3.47487e-28	-1.01687	0.309214	0.509741	0.0700259	0.245566
TCGA-B5-A1MW-01A-11R-A17A-13	UCEC	MIR27A	hsa-mir-27a	chr19	-	3p	13836523	NA	flanking-5	5p	NA	NA	-15	G	A	23.0022	35.1553	128	5.52855e-20	2.95777e-17	0.965203	0.334443	0.475678	0.294778	0.181136
TCGA-DI-A0WH-01A-12R-A12H-13	UCEC	MIR27A	hsa-mir-27a	chr19	-	3p	13836448	COSN2382145	non-seed duplex_3p	3p	20	NA	NA	C	T	1330.97	1881.56	521	8.58396e-62	4.59242e-59	-0.834824	0.403817	0.393816	0.0757392	0.163385
TCGA-AB-2840-03A-01T-0734-13	LAML	MIR27A	hsa-mir-27a	chr19	-	3p	13836478	NA	loop	3p	NA	9	NA	T	C	786.823	3138.07	189	2.39307e-23	1.28029e-20	-0.83229	0.405245	0.392282	0.10189	0.245566
TCGA-XD-AAUG-01A-61R-A41G-13	PAAD	MIR27A	hsa-mir-27a	chr19	-	3p	13836478	NA	loop	3p	NA	9	NA	T	C	944.412	1720.27	156	8.63913e-18	4.62193e-15	0.779935	0.435429	0.361083	0.19126	0.125475
TCGA-AB-2935-03A-01T-0740-13	LAML	MIR27A	hsa-mir-27a	chr19	-	3p	13836478	NA	loop	5p	NA	9	NA	T	C	103.735	206.541	187	1.15451e-15	6.17664e-13	-0.641001	0.521522	0.282727	0.0648784	0.202525
TCGA-B5-A1MW-01A-11R-A17A-13	UCEC	MIR27A	hsa-mir-27a	chr19	-	3p	13836523	NA	flanking-5	3p	NA	NA	-15	G	A	1604.35	1879.09	521	4.34128e-40	2.32258e-37	-0.633629	0.526323	0.278748	0.0951239	0.159485
TCGA-AB-2840-03A-01T-0734-13	LAML	MIR27A	hsa-mir-27a	chr19	-	3p	13836478	NA	loop	5p	NA	9	NA	T	C	48.8078	206.541	187	8.03238e-11	4.29732e-08	0.504384	0.613991	0.211838	0.310836	0.202525
TCGA-BR-8360-01A-11R-2343-13	STAD	MIR27A	hsa-mir-27a	chr19	-	3p	13836441	NA	flanking-3	3p	NA	NA	6	TG	T	1634.82	1807.18	423	0.868957	1	0.00802666	0.993596	0.00279029	0.157917	0.157152
TCGA-AA-3710-01A-01T-1021-13	COAD	MIR28	hsa-mir-28	chr3	+	both	188688799	COSN18185224	seed_5p	5p	6	NA	NA	G	T	125.473	139.852	433	2.03567e-53	1.08908e-50	-0.853878	0.393172	0.405417	0.0856969	0.168252
TCGA-AA-3710-01A-01T-1021-13	COAD	MIR28	hsa-mir-28	chr3	+	both	188688799	COSN18185224	seed_5p	3p	6	NA	NA	G	T	7889	7430.95	433	2.14345e-34	1.14675e-31	0.642919	0.520277	0.283766	0.111403	0.0816279
TCGA-22-4609-01A-21H-2124-13	LUSC	MIR29A	hsa-mir-29a	chr7	-	3p	130876745	NA	flanking-3	3p	NA	NA	3	T	C	7727.04	6700.78	465	4.04051e-34	2.16167e-31	-0.613433	0.53959	0.267936	0.0779156	0.127165
TCGA-ER-A42L-06A-11R-A24Y-13	SKCM	MIR29A	hsa-mir-29a	chr7	-	3p	130876820	NA	flanking-5	3p	NA	NA	-13	G	A	12161.7	14662.1	448	2.10391e-31	1.12559e-28	-0.595773	0.551327	0.258591	0.116804	0.181431
TCGA-D3-A8GN-06A-11R-A37G-13	SKCM	MIR29A	hsa-mir-29a	chr7	-	3p	130876738	NA	flanking-3	3p	NA	NA	10	C	T	22126.8	14662.1	448	8.78744e-21	4.70128e-18	-0.464517	0.642277	0.192278	0.131042	0.181431
TCGA-BT-A3PH-01A-11R-A222-13	BLCA	MIR29A	hsa-mir-29a	chr7	-	3p	130876827	NA	flanking-5	3p	NA	NA	-20	G	C	3542.72	7184.14	405	2.39998e-12	1.28399e-09	-0.359375	0.719314	0.143081	0.0880172	0.111734
TCGA-AA-3492-01A-01T-1409-13	COAD	MIR29A	hsa-mir-29a	chr7	-	3p	130876729	NA	flanking-3	3p	NA	NA	19	T	C	8214.01	8203.85	433	3.99397e-06	0.00213677	0.224512	0.822359	0.0849388	0.161797	0.1415
TCGA-PK-A5HB-01A-11R-A29W-13	ACC	MIR29C	hsa-mir-29c	chr1	-	3p	207801845	NA	flanking-3	5p	NA	NA	20	C	T	78.0872	75.9972	60	8.3995e-08	4.49373e-05	-0.789149	0.430025	0.366506	0.145486	0.215876
TCGA-PK-A5HB-01A-11R-A29W-13	ACC	MIR29C	hsa-mir-29c	chr1	-	3p	207801845	NA	flanking-3	3p	NA	NA	20	C	T	1922.25	1551.53	78	0.332493	1	0.110425	0.912073	0.0399706	0.169707	0.159105
TCGA-AD-6889-01A-11H-1927-13	COAD	MIR30A	hsa-mir-30a	chr6	-	5p	71403531	NA	flanking-3	5p	NA	NA	23	C	A	2114.7	5266.07	431	8.72306e-73	4.66684e-70	1.0637	0.287465	0.541416	0.129812	0.0744209
TCGA-DM-A0XF-01A-11H-A154-13	COAD	MIR30A	hsa-mir-30a	chr6	-	5p	71403581	NA	loop	3p	NA	14	NA	C	T	1944.49	2353.26	431	4.96935e-63	2.6586e-60	-0.959522	0.337296	0.471989	0.0505594	0.113683
TCGA-BA-4076-01A-01T-1435-13	HNSC	MIR30A	hsa-mir-30a	chr6	-	5p	71403620	NA	flanking-5	5p	NA	NA	-4	G	C	2570.85	6780.14	518	5.38206e-30	2.8794e-27	-0.533197	0.593897	0.226289	0.0668325	0.106503
TCGA-DM-A0XF-01A-11H-A154-13	COAD	MIR30A	hsa-mir-30a	chr6	-	5p	71403581	NA	loop	5p	NA	14	NA	C	T	5264.78	5266.07	431	1.1111e-15	5.94436e-13	-0.401137	0.688319	0.16221	0.0535321	0.0744209
TCGA-CV-7568-01A-11R-2231-13	HNSC	MIR30A	hsa-mir-30a	chr6	-	5p	71403578	NA	loop	5p	NA	17	NA	C	T	3834.89	6780.14	518	1.72269e-16	9.2164e-14	-0.374452	0.708068	0.149925	0.0786432	0.106503
TCGA-CV-7568-01A-11R-2231-13	HNSC	MIR30A	hsa-mir-30a	chr6	-	5p	71403578	NA	loop	3p	NA	17	NA	C	T	1367.28	2418.73	518	3.01021e-12	1.61046e-09	0.314081	0.75346	0.12294	0.160133	0.136672
TCGA-AD-6889-01A-11H-1927-13	COAD	MIR30A	hsa-mir-30a	chr6	-	5p	71403531	NA	flanking-3	3p	NA	NA	23	C	A	750.932	2353.26	431	0.151525	1	0.0692043	0.944827	0.0246477	0.118236	0.113683
TCGA-66-2780-01A-01T-1557-13	LUSC	MIR30B	hsa-mir-30b	chr8	-	5p	134800559	NA	loop	5p	NA	11	NA	C	G	232.079	410.345	466	7.96138e-66	4.25934e-63	-0.937957	0.348267	0.458088	0.0261217	0.0789667
TCGA-D8-A27V-01A-12R-A17A-13	BRCA	MIR30B	hsa-mir-30b	chr8	-	5p	134800551	COSN23017168	seed_3p	5p	3	NA	NA	C	T	228.273	523.207	1073	6.30452e-64	3.37292e-61	0.551678	0.581169	0.235697	0.143361	0.098149
TCGA-CK-5916-01A-11H-1652-13	COAD	MIR30D	hsa-mir-30d	chr8	-	5p	134804874	NA	flanking-3	5p	NA	NA	5	C	T	4587.57	6681.45	433	9.93556e-79	5.31553e-76	1.12361	0.261178	0.583064	0.141738	0.0848187
TCGA-MV-A51V-01A-11R-A26X-13	BLCA	MIR30D	hsa-mir-30d	chr8	-	5p	134804855	NA	flanking-3	5p	NA	NA	24	G	C	5806.18	5629.01	404	8.42196e-05	0.0450575	-0.197643	0.843324	0.0740055	0.0827236	0.0925187
TCGA-64-5781-01A-01T-1627-13	LUAD	MIR30D	hsa-mir-30d	chr8	-	5p	134804916	COSN24409198	loop	5p	NA	3	NA	C	A	6324.41	14323.3	509	0.0630376	1	0.0825765	0.934188	0.0295656	0.0782589	0.074875
TCGA-67-3771-01A-01T-0947-13	LUAD	MIR30E	hsa-mir-30e	chr1	+	5p	40754357	NA	flanking-5	3p	NA	NA	-14	G	A	7711.37	8058.18	509	5.40299e-94	2.8906e-91	1.13961	0.25445	0.594397	0.188726	0.1094
TCGA-D6-A6EO-01A-11R-A31R-13	HNSC	MIR30E	hsa-mir-30e	chr1	+	5p	40754408	NA	loop	5p	NA	16	NA	A	T	5563.39	4348.37	519	5.97811e-43	3.19829e-40	-0.662759	0.507485	0.294577	0.170152	0.272612
TCGA-D6-A6EO-01A-11R-A31R-13	HNSC	MIR30E	hsa-mir-30e	chr1	+	5p	40754408	NA	loop	3p	NA	16	NA	A	T	10040.8	6642.97	519	3.03495e-37	1.6237e-34	-0.607031	0.54383	0.264537	0.0737169	0.12007
TCGA-BR-4201-01A-01R-1131-13	STAD	MIR30E	hsa-mir-30e	chr1	+	5p	40754448	NA	flanking-3	3p	NA	NA	14	G	A	4860.55	5732.18	422	4.09262e-26	2.18955e-23	-0.551022	0.581618	0.235362	0.0684401	0.0977176
TCGA-67-3771-01A-01T-0947-13	LUAD	MIR30E	hsa-mir-30e	chr1	+	5p	40754357	NA	flanking-5	5p	NA	NA	-14	G	A	6560.84	5722.81	509	2.84346e-28	1.52125e-25	0.519785	0.603214	0.219529	0.282473	0.217607
TCGA-BR-4201-01A-01R-1131-13	STAD	MIR30E	hsa-mir-30e	chr1	+	5p	40754448	NA	flanking-3	5p	NA	NA	14	G	A	3676.55	3948	422	1.07995e-22	5.77773e-20	-0.506174	0.612734	0.212728	0.155797	0.217898
TCGA-D1-A17M-01A-21R-A12H-13	UCEC	MIR32	hsa-mir-32	chr9	-	5p	109046215	NA	flanking-3	5p	NA	NA	16	G	A	31.4499	64.7883	466	1.69362e-39	9.06084e-37	0.670878	0.502298	0.299039	0.142298	0.101748
TCGA-4Z-AA7M-01A-11R-A39B-13	BLCA	MIR320A	hsa-mir-320a	chr8	-	3p	22245004	NA	loop	3p	NA	3	NA	C	T	413.766	856.374	404	1.0726e-120	5.7384e-118	1.69474	0.0901252	1.04515	0.189366	0.108237
TCGA-D1-A15X-01A-11R-A119-13	UCEC	MIR320A	hsa-mir-320a	chr8	-	3p	22244960	NA	flanking-3	3p	NA	NA	15	T	C	501.537	1317.5	523	7.824e-154	4.18584e-151	1.67564	0.0938084	1.02776	0.218094	0.115259
TCGA-55-8089-01A-11H-2240-13	LUAD	MIR320A	hsa-mir-320a	chr8	-	3p	22244987	COSN24411655	non-seed duplex_3p	3p	10	NA	NA	C	A	696.393	608.128	509	1.40076e-99	7.49406e-97	-1.19073	0.23376	0.631229	0.0415515	0.107618
TCGA-DQ-5624-01A-01R-1872-13	HNSC	MIR320A	hsa-mir-320a	chr8	-	3p	22244987	COSN2378943	non-seed duplex_3p	3p	10	NA	NA	C	T	251.182	884.043	519	1.69797e-45	9.08415e-43	0.68704	0.492057	0.307984	0.144577	0.106947
TCGA-VS-A959-01A-11R-A42V-13	CESC	MIR320A	hsa-mir-320a	chr8	-	3p	22244961	NA	flanking-3	3p	NA	NA	14	C	T	773.748	922.556	304	3.02976e-26	1.62092e-23	-0.669442	0.503214	0.298248	0.0694931	0.101334
TCGA-D8-A1JE-01A-11R-A13P-13	BRCA	MIR320A	hsa-mir-320a	chr8	-	3p	22245044	NA	flanking-5	3p	NA	NA	-16	G	T	479.847	860.526	1073	1.01218e-68	5.41517e-66	-0.575667	0.56484	0.248074	0.0817665	0.116367
TCGA-EE-A2A2-06A-11R-A18W-13	SKCM	MIR320A	hsa-mir-320a	chr8	-	3p	22245033	NA	flanking-5	3p	NA	NA	-5	G	A	16981.2	2845.94	448	1.91326e-18	1.02359e-15	-0.432668	0.665256	0.177011	0.109922	0.155851
TCGA-AA-3663-01A-01T-1722-13	COAD	MIR320A	hsa-mir-320a	chr8	-	3p	22244970	COSN23013034	flanking-3	3p	NA	NA	5	CT	C	481.475	1043.38	433	2.86234e-17	1.53135e-14	-0.423827	0.671692	0.17283	0.100501	0.135932
TCGA-21-1079-01A-01T-1557-13	LUSC	MIR320A	hsa-mir-320a	chr8	-	3p	22245034	NA	flanking-5	3p	NA	NA	-6	G	A	877.375	697.311	465	4.99433e-18	2.67197e-15	0.418286	0.675738	0.170222	0.138471	0.115407
TCGA-BT-A20N-01A-11R-A14X-13	BLCA	MIR320A	hsa-mir-320a	chr8	-	3p	22245021	COSN2376802	seed_5p	3p	8	NA	NA	G	A	1267.01	856.374	404	1.52666e-08	8.16762e-06	-0.287393	0.773812	0.111365	0.094479	0.108237
TCGA-HT-7476-01A-11R-2026-13	LGG	MIR323A	hsa-mir-323a	chr14	+	3p	101025761	COSN20052415	non-seed duplex_5p	3p	15	NA	NA	G	A	236.083	79.5104	343	3.86929e-65	2.07007e-62	-1.15632	0.247551	0.606335	0.0627532	0.191649
TCGA-A5-A0GW-01A-11R-A041-13	UCEC	MIR324	hsa-mir-324	chr17	-	both	7223290	NA	flanking-3	3p	NA	NA	18	C	T	53.9036	84.2858	479	1.84886e-33	9.89141e-31	0.59574	0.551349	0.258573	0.236797	0.17095
TCGA-A5-A0GW-01A-11R-A041-13	UCEC	MIR324	hsa-mir-324	chr17	-	both	7223290	NA	flanking-3	5p	NA	NA	18	C	T	52.7249	65.918	446	1.57203e-17	8.41036e-15	-0.420804	0.673898	0.171406	0.168752	0.216876
TCGA-AP-A5FX-01A-11R-A27R-13	UCEC	MIR324	hsa-mir-324	chr17	-	both	7223295	NA	flanking-3	5p	NA	NA	13	C	T	59.3627	65.918	446	1.10035e-11	5.88688e-09	-0.330359	0.741129	0.130106	0.179095	0.216876
TCGA-AP-A5FX-01A-11R-A27R-13	UCEC	MIR324	hsa-mir-324	chr17	-	both	7223295	NA	flanking-3	3p	NA	NA	13	C	T	41.3504	84.2858	479	2.91365e-10	1.5588e-07	0.294254	0.768564	0.11432	0.203474	0.17095
TCGA-D3-A3C8-06A-12R-A18V-13	SKCM	MIR328	hsa-mir-328	chr16	-	3p	67202413	NA	flanking-5	3p	NA	NA	-24	G	A	138.094	310.991	447	9.40645e-103	5.03245e-100	1.35072	0.176787	0.752551	0.357137	0.184431
TCGA-BS-A0U8-01A-11R-A103-13	UCEC	MIR328	hsa-mir-328	chr16	-	3p	67202382	COSN23014987	seed_5p	3p	8	NA	NA	G	GC	87.908	108.155	515	5.76515e-103	3.08435e-100	-1.21103	0.225886	0.646111	0.0538796	0.149629
TCGA-F4-6570-01A-11H-1773-13	COAD	MIR328	hsa-mir-328	chr16	-	3p	67202382	COSN23012614	seed_5p	3p	8	NA	NA	GC	G	39.1965	74.29	396	3.01803e-16	1.61464e-13	-0.428968	0.667946	0.175258	0.145625	0.19405
TCGA-B4-5844-01A-11R-1671-13	KIRC	MIR328	hsa-mir-328	chr16	-	3p	67202381	COSN525546	non-seed duplex_5p	3p	9	NA	NA	T	C	80.4953	133.504	498	1.2035e-12	6.4387e-10	-0.326811	0.743811	0.128537	0.0999077	0.124742
TCGA-O2-A52Q-01A-11H-A26V-13	LUSC	MIR328	hsa-mir-328	chr16	-	3p	67202402	NA	flanking-5	3p	NA	NA	-13	G	C	26.2986	88.2511	459	0.613234	1	0.0236092	0.981164	0.00825823	0.159753	0.157423
TCGA-DK-A3X1-01A-12R-A22V-13	BLCA	MIR330	hsa-mir-330	chr19	-	3p	45639038	NA	loop	5p	NA	11	NA	G	A	44.1863	74.3364	382	2.24657e-81	1.20191e-78	1.26712	0.205112	0.688008	0.295104	0.165659
TCGA-D1-A16J-01A-11R-A12H-13	UCEC	MIR330	hsa-mir-330	chr19	-	3p	45639012	COSN498826	non-seed duplex_3p	5p	20	NA	NA	C	T	31.0396	72.6967	476	5.10023e-40	2.72862e-37	-0.667853	0.504228	0.297373	0.0967294	0.180862
TCGA-CV-7089-01A-11R-2015-13	HNSC	MIR330	hsa-mir-330	chr19	-	3p	45639012	COSN498826	non-seed duplex_3p	5p	20	NA	NA	C	T	35.8367	68.0919	497	0.070888	1	-0.0811933	0.935288	0.0290545	0.152813	0.160562
TCGA-K4-A54R-01A-11R-A26X-13	BLCA	MIR330	hsa-mir-330	chr19	-	3p	45638999	NA	flanking-3	5p	NA	NA	10	G	A	76.737	74.3364	382	0.191248	1	0.0669857	0.946593	0.0238367	0.172502	0.165659
TCGA-MT-A67F-01A-11R-A30I-13	HNSC	MIR331	hsa-mir-331	chr12	+	3p	95308469	NA	loop	3p	NA	3	NA	G	A	30.5253	48.9445	427	1.0199e-60	5.45647e-58	0.940723	0.346847	0.459862	0.277188	0.186141
TCGA-DA-A95V-06A-11R-A37G-13	SKCM	MIR331	hsa-mir-331	chr12	+	3p	95308515	NA	flanking-3	3p	NA	NA	15	C	T	21.0873	54.7306	345	6.76914e-42	3.62149e-39	-0.840266	0.400759	0.397116	0.11947	0.204181
TCGA-AX-A2IN-01A-12R-A17X-13	UCEC	MIR335	hsa-mir-335	chr7	+	5p	130496154	NA	loop	3p	NA	6	NA	A	G	95.2595	203.791	511	0.00251128	1	-0.134351	0.893125	0.0490879	0.167642	0.182013
TCGA-D3-A8GO-06A-11R-A37G-13	SKCM	MIR335	hsa-mir-335	chr7	+	5p	130496140	COSN23016863	non-seed duplex_5p	3p	15	NA	NA	G	A	475.744	100.764	217	0.130574	1	-0.103022	0.917945	0.0371832	0.193835	0.2166
TCGA-EO-A22S-01A-11R-A18L-13	UCEC	MIR337	hsa-mir-337	chr14	+	both	100874505	NA	flanking-5	3p	NA	NA	-10	TG	T	30.493	55.7591	259	6.22498e-17	3.33037e-14	0.557383	0.577266	0.238624	0.311605	0.24146
TCGA-D1-A17D-01A-12R-A12H-13	UCEC	MIR337	hsa-mir-337	chr14	+	both	100874505	NA	flanking-5	3p	NA	NA	-10	TG	T	22.3848	55.7591	259	0.00464	1	-0.17746	0.859147	0.0659325	0.219127	0.24146
TCGA-A4-A5Y0-01A-11R-A31S-13	KIRP	MIR338	hsa-mir-338	chr17	-	both	81125863	NA	flanking-3	3p	NA	NA	24	C	G	45.9896	125.367	266	5.1096e-39	2.73364e-36	0.950481	0.341868	0.466142	0.233273	0.144668
TCGA-AJ-A23N-01A-11R-A22I-13	UCEC	MIR340	hsa-mir-340	chr5	-	5p	180015400	NA	flanking-5	5p	NA	NA	-18	G	A	22.0056	31.7514	174	1.00018e-20	5.35097e-18	-0.808438	0.418839	0.377953	0.0649423	0.170609
TCGA-78-7536-01A-11H-2065-13	LUAD	MIR340	hsa-mir-340	chr5	-	5p	180015350	COSN24411365	loop	5p	NA	11	NA	C	T	59.7003	30.2318	134	3.92766e-06	0.0021013	-0.416033	0.677386	0.169164	0.115983	0.161606
TCGA-D9-A149-06A-11R-A18V-13	SKCM	MIR342	hsa-mir-342	chr14	+	3p	100109729	COSN1080961	non-seed duplex_3p	3p	15	NA	NA	C	T	373.708	446.564	446	4.35484e-111	2.32984e-108	1.44414	0.148699	0.827691	0.458642	0.255441
TCGA-FP-A4BE-01A-12R-A24L-13	STAD	MIR342	hsa-mir-342	chr14	+	3p	100109746	NA	flanking-3	3p	NA	NA	9	C	T	155.207	145.08	421	2.31045e-50	1.23609e-47	-0.835924	0.403198	0.394482	0.0993388	0.18239
TCGA-HZ-8636-01A-21R-2401-13	PAAD	MIR342	hsa-mir-342	chr14	+	3p	100109659	NA	flanking-5	3p	NA	NA	-14	C	T	81.1662	111.567	156	7.767e-16	4.15535e-13	-0.720358	0.471304	0.326699	0.102198	0.160447
TCGA-90-A4ED-01A-31H-A25B-13	LUSC	MIR342	hsa-mir-342	chr14	+	3p	100109708	NA	loop	3p	NA	15	NA	G	A	136.866	226.618	466	0.264383	1	0.0517644	0.958716	0.0183098	0.201916	0.196202
TCGA-D8-A142-01A-11R-A114-13	BRCA	MIR342	hsa-mir-342	chr14	+	3p	100109710	COSN23014460	loop	3p	NA	17	NA	A	G	128.742	483.25	1072	0.124335	1	0.0469753	0.962533	0.0165844	0.230197	0.224413
TCGA-G4-6315-01A-11H-1722-13	COAD	MIR345	hsa-mir-345	chr14	+	5p	100307851	NA	flanking-5	5p	NA	NA	-25	A	C	41.4349	51.0199	209	5.18424e-06	0.00277357	0.323667	0.74619	0.127151	0.237671	0.201484
TCGA-FD-A3B7-01A-31R-A20E-13	BLCA	MIR34A	hsa-mir-34a	chr1	-	5p	9151733	COSN513667	loop	5p	NA	2	NA	C	T	236.321	225.854	404	9.00861e-21	4.8196e-18	0.491749	0.622897	0.205584	0.166264	0.130887
TCGA-EE-A29P-06A-11R-A18W-13	SKCM	MIR34A	hsa-mir-34a	chr1	-	5p	9151778	NA	flanking-5	5p	NA	NA	-22	G	A	434.275	409.719	446	3.88207e-17	2.07691e-14	-0.415176	0.678013	0.168762	0.134977	0.18553
TCGA-JX-A3Q0-01A-11R-A21U-13	CESC	MIR34A	hsa-mir-34a	chr1	-	5p	9151691	COSN16128430	flanking-3	5p	NA	NA	2	C	G	177.126	224.22	304	0.121765	1	-0.0889991	0.929083	0.0319457	0.134525	0.140377
TCGA-D1-A176-01A-11R-A12H-13	UCEC	MIR34C	hsa-mir-34c	chr11	+	5p	111513427	NA	flanking-5	3p	NA	NA	-24	AT	A	37.0652	108.067	172	9.27832e-16	4.9639e-13	0.676563	0.498683	0.302175	0.364455	0.275303
TCGA-D1-A176-01A-11R-A12H-13	UCEC	MIR34C	hsa-mir-34c	chr11	+	5p	111513427	NA	flanking-5	5p	NA	NA	-24	AT	A	40.576	167.354	194	3.97101e-05	0.0212449	-0.301998	0.762654	0.117673	0.268262	0.320348
TCGA-66-2727-01A-01T-0981-13	LUSC	MIR361	hsa-mir-361	chrX	-	5p	85903616	NA	flanking-3	3p	NA	NA	25	C	T	149.971	220.329	465	4.54208e-113	2.43001e-110	1.41591	0.156801	0.804652	0.410848	0.238347
TCGA-L5-A43C-01A-11R-A24L-13	ESCA	MIR361	hsa-mir-361	chrX	-	5p	85903637	NA	flanking-3	3p	NA	NA	4	A	G	202.037	190.026	182	3.51239e-17	1.87913e-14	-0.692466	0.488645	0.311007	0.153701	0.227826
TCGA-22-5473-01A-01T-1634-13	LUSC	MIR361	hsa-mir-361	chrX	-	5p	85903692	COSN2378982	non-seed duplex_5p	3p	11	NA	NA	G	A	95.7283	220.329	465	1.49457e-31	7.99594e-29	-0.584738	0.558724	0.252803	0.167109	0.238347
TCGA-66-2727-01A-01T-0981-13	LUSC	MIR361	hsa-mir-361	chrX	-	5p	85903616	NA	flanking-3	5p	NA	NA	25	C	T	384.966	380.348	465	2.86158e-28	1.53094e-25	0.547044	0.584349	0.233328	0.21517	0.163747
TCGA-22-5473-01A-01T-1634-13	LUSC	MIR361	hsa-mir-361	chrX	-	5p	85903692	COSN2378982	non-seed duplex_5p	5p	11	NA	NA	G	A	184.113	381.853	465	8.59552e-24	4.5986e-21	-0.493257	0.621831	0.206327	0.117368	0.163738
TCGA-L5-A43C-01A-11R-A24L-13	ESCA	MIR361	hsa-mir-361	chrX	-	5p	85903637	NA	flanking-3	5p	NA	NA	4	A	G	313.824	352.158	182	0.0011125	0.595189	0.245617	0.805978	0.0936766	0.200539	0.175842
TCGA-EE-A2MD-06A-11R-A18W-13	SKCM	MIR362	hsa-mir-362	chrX	+	5p	50008956	NA	flanking-5	5p	NA	NA	-12	C	T	92.1063	217.206	425	1.01622e-36	5.43679e-34	-0.677281	0.498227	0.302572	0.113478	0.220587
TCGA-CV-A45P-01A-11R-A24J-13	HNSC	MIR363	hsa-mir-363	chrX	-	3p	134169360	NA	flanking-3	3p	NA	NA	22	C	T	63.1633	55.7847	159	1.60337e-11	8.57804e-09	-0.576189	0.564487	0.248346	0.19354	0.276354
TCGA-91-6829-01A-21H-1857-13	LUAD	MIR365A	hsa-mir-365a	chr16	+	3p	14309314	COSN24408400	non-seed duplex_5p	3p	15	NA	NA	G	T	32.8015	71.6301	434	6.33085e-99	3.387e-96	1.34084	0.179971	0.744797	0.30513	0.169751
TCGA-EE-A2MR-06A-11R-A18V-13	SKCM	MIR365B	hsa-mir-365b	chr17	+	3p	31575494	COSN5027839	non-seed duplex_3p	3p	17	NA	NA	C	T	32.7529	101.747	420	2.89343e-73	1.54798e-70	1.08889	0.276204	0.55877	0.383569	0.223258
TCGA-E6-A1M0-01A-11R-A143-13	UCEC	MIR374B	hsa-mir-374b	chrX	-	5p	74218626	NA	flanking-5	5p	NA	NA	-18	C	A	85.0038	122.969	520	1.96234e-96	1.04985e-93	-1.1436	0.25279	0.597241	0.0556768	0.152511
TCGA-AB-2808-03A-01T-0734-13	LAML	MIR374B	hsa-mir-374b	chrX	-	5p	74218618	NA	flanking-5	5p	NA	NA	-10	T	A	222.318	299.206	190	2.00419e-24	1.07224e-21	0.855816	0.3921	0.406604	0.320251	0.211023
TCGA-A6-A566-01A-11H-A28I-13	COAD	MIR374B	hsa-mir-374b	chrX	-	5p	74218546	NA	flanking-3	5p	NA	NA	11	T	C	72.6489	97.1691	426	2.36478e-21	1.26516e-18	-0.485434	0.627369	0.202477	0.141608	0.195172
TCGA-B5-A11L-01B-21R-A13R-13	UCEC	MIR374B	hsa-mir-374b	chrX	-	5p	74218537	NA	flanking-3	5p	NA	NA	20	C	T	46.1017	122.969	520	1.21354e-09	6.49243e-07	-0.271507	0.786001	0.104577	0.129521	0.152511
TCGA-G3-A5SK-01A-11R-A27R-13	LIHC	MIR374B	hsa-mir-374b	chrX	-	5p	74218572	COSN16303142	seed_3p	5p	7	NA	NA	T	G	86.9824	109.472	367	0.000113384	0.0606607	-0.2037	0.838588	0.0764515	0.16245	0.181816
TCGA-D7-6518-01A-11R-1802-13	STAD	MIR379	hsa-mir-379	chr14	+	5p	101022093	COSN7428815	loop	5p	NA	2	NA	G	A	282.267	644.737	421	2.07158e-83	1.1083e-80	-1.19897	0.230539	0.637255	0.0298009	0.0903544
TCGA-VQ-A91D-01A-11R-A415-13	STAD	MIR379	hsa-mir-379	chr14	+	5p	101022054	NA	flanking-5	5p	NA	NA	-17	C	T	579.347	644.737	421	5.01773e-51	2.68448e-48	-0.843273	0.399076	0.398944	0.0477653	0.0903544
TCGA-78-7535-01A-11H-2065-13	LUAD	MIR379	hsa-mir-379	chr14	+	5p	101022087	COSN24410139	non-seed duplex_5p	5p	17	NA	NA	G	T	511.512	748.066	505	1.31714e-41	7.04669e-39	0.660487	0.508941	0.293332	0.121748	0.0853111
TCGA-55-7574-01A-11H-2038-13	LUAD	MIR379	hsa-mir-379	chr14	+	5p	101022151	NA	flanking-3	5p	NA	NA	21	C	T	1061.61	745.281	505	4.46495e-29	2.38875e-26	-0.530934	0.595464	0.225144	0.0561226	0.0854379
TCGA-FD-A6TI-01A-11R-A32J-13	BLCA	MIR379	hsa-mir-379	chr14	+	5p	101022067	NA	flanking-5	5p	NA	NA	-4	G	C	602.107	1036.08	404	1.1262e-20	6.02516e-18	-0.490366	0.623875	0.204902	0.0573621	0.0845688
TCGA-FR-A8YE-06A-11R-A37G-13	SKCM	MIR379	hsa-mir-379	chr14	+	5p	101022145	NA	flanking-3	5p	NA	NA	15	C	T	285.829	859.079	441	1.7269e-16	9.2389e-14	-0.408246	0.683093	0.16552	0.0729147	0.12169
TCGA-CK-6747-01A-11H-1838-13	COAD	MIR379	hsa-mir-379	chr14	+	5p	101022093	COSN7428815	loop	5p	NA	2	NA	G	A	735.287	899.28	432	5.95017e-15	3.18334e-12	-0.389426	0.696961	0.156791	0.0626281	0.0835889
TCGA-D3-A5GL-06A-11R-A27U-13	SKCM	MIR379	hsa-mir-379	chr14	+	5p	101022139	NA	flanking-3	5p	NA	NA	9	C	T	779.23	859.079	441	3.1978e-15	1.71082e-12	-0.389264	0.697081	0.156717	0.0751825	0.12169
TCGA-95-7039-01A-11H-1948-13	LUAD	MIR379	hsa-mir-379	chr14	+	5p	101022087	COSN24410139	non-seed duplex_5p	5p	17	NA	NA	G	T	480.787	748.066	505	4.96579e-11	2.6567e-08	0.298981	0.764955	0.116364	0.101805	0.0853111
TCGA-CV-5443-01A-01R-1513-13	HNSC	MIR379	hsa-mir-379	chr14	+	5p	101022093	COSN7428815	loop	5p	NA	2	NA	G	A	574.071	984.61	519	0.000908688	0.486148	0.146465	0.883555	0.0537666	0.108901	0.099379
TCGA-AX-A3G9-01A-11R-A22I-13	UCEC	MIR379	hsa-mir-379	chr14	+	5p	101022086	COSN18715117	non-seed duplex_5p	5p	16	NA	NA	C	T	493.609	543.712	522	0.0439189	1	-0.0884028	0.929557	0.0317242	0.0935181	0.098771
TCGA-GN-A4U8-06A-11R-A360-13	SKCM	MIR379	hsa-mir-379	chr14	+	5p	101022061	NA	flanking-5	5p	NA	NA	-10	C	T	131.757	859.079	441	0.87336	1	0.00759449	0.993941	0.0026396	0.122598	0.12169
TCGA-A5-A0R7-01A-31R-A103-13	UCEC	MIR381	hsa-mir-381	chr14	+	3p	101045927	COSN2381583	non-seed duplex_5p	3p	1	NA	NA	A	G	63.9771	66.1938	377	2.54878e-61	1.3636e-58	-1.03239	0.301887	0.520155	0.0783737	0.191965
TCGA-YD-A9TA-06A-11R-A39J-13	SKCM	MIR381	hsa-mir-381	chr14	+	3p	101045996	NA	flanking-3	3p	NA	NA	7	C	T	37.0068	57.7249	197	0.000413329	0.221131	-0.255994	0.797955	0.0980215	0.197539	0.238844
TCGA-EE-A2MI-06A-11R-A18X-13	SKCM	MIR382	hsa-mir-382	chr14	+	5p	101054377	NA	flanking-3	5p	NA	NA	5	C	T	59.9595	61.8837	148	6.02438e-10	3.22305e-07	-0.544852	0.585855	0.23221	0.1274	0.196162
TCGA-AA-3949-01A-01T-1021-13	COAD	MIR382	hsa-mir-382	chr14	+	5p	101054389	NA	flanking-3	5p	NA	NA	17	C	A	36.5426	62.2197	259	0.450579	1	-0.0469507	0.962553	0.0165756	0.214676	0.220509
TCGA-64-1676-01A-01T-0947-13	LUAD	MIR409	hsa-mir-409	chr14	+	both	101065373	COSN24408235	flanking-3	3p	NA	NA	6	G	A	20.5777	78.7575	108	8.41351e-09	4.50123e-06	0.601716	0.547363	0.261724	0.400445	0.327682
TCGA-24-1422-01A-01R-1565-13	OV	MIR423	hsa-mir-423	chr17	+	5p	30117165	NA	flanking-3	3p	NA	NA	12	A	C	469.412	690.898	488	3.71637e-10	1.98826e-07	-0.289592	0.772128	0.112311	0.119034	0.138261
TCGA-24-1422-01A-01R-1565-13	OV	MIR423	hsa-mir-423	chr17	+	5p	30117165	NA	flanking-3	5p	NA	NA	12	A	C	195.433	282.511	488	1.45264e-07	7.7716e-05	0.241586	0.809101	0.0919971	0.199218	0.173795
TCGA-C4-A0EZ-01A-21R-A24Y-13	BLCA	MIR424	hsa-mir-424	chrX	-	5p	134546697	COSM422225	seed_5p	5p	5	NA	NA	T	A	90.4401	113.729	390	2.82634e-67	1.51209e-64	-1.07847	0.280824	0.551566	0.0347181	0.112263
TCGA-BC-A217-01A-11R-A154-13	LIHC	MIR424	hsa-mir-424	chrX	-	5p	134546724	NA	flanking-5	5p	NA	NA	-23	G	T	83.6291	128.667	365	3.63193e-60	1.94308e-57	-1.04177	0.297516	0.526489	0.0267112	0.0876153
TCGA-B5-A11N-01A-11R-A119-13	UCEC	MIR424	hsa-mir-424	chrX	-	5p	134546636	NA	flanking-3	5p	NA	NA	8	G	A	82.8553	308.44	520	1.36688e-53	7.3128e-51	0.761515	0.44635	0.350325	0.159387	0.103704
TCGA-G4-6303-01A-11H-1773-13	COAD	MIR424	hsa-mir-424	chrX	-	5p	134546635	NA	flanking-3	5p	NA	NA	9	C	T	244.181	124.035	423	1.20845e-16	6.46521e-14	-0.419896	0.674561	0.170979	0.100954	0.135708
TCGA-EO-A22T-01A-21R-A18L-13	UCEC	MIR424	hsa-mir-424	chrX	-	5p	134546629	NA	flanking-3	5p	NA	NA	15	T	C	186.621	308.44	520	2.32574e-19	1.24427e-16	-0.410637	0.681339	0.166637	0.0736776	0.103704
TCGA-24-2033-01A-01R-1568-13	OV	MIR424	hsa-mir-424	chrX	-	5p	134546620	NA	flanking-3	5p	NA	NA	24	C	T	25.887	54.256	157	0.0449131	1	-0.161352	0.871816	0.0595751	0.23854	0.265379
TCGA-G3-A25Y-01A-11R-A16S-13	LIHC	MIR425	hsa-mir-425	chr3	-	5p	49020176	COSN16303086	seed_3p	5p	5	NA	NA	C	T	96.2564	229.099	368	1.71508e-22	9.1757e-20	-0.543893	0.586515	0.231721	0.114619	0.149216
TCGA-78-7167-01A-11H-2065-13	LUAD	MIR425	hsa-mir-425	chr3	-	5p	49020134	NA	flanking-3	5p	NA	NA	25	T	A	58.2448	268.085	509	1.45799e-29	7.80025e-27	-0.533846	0.593448	0.226617	0.136963	0.1838
TCGA-IR-A3LI-01A-11R-A214-13	CESC	MIR425	hsa-mir-425	chr3	-	5p	49020178	COSN16131364	seed_3p	5p	3	NA	NA	G	A	201.815	282.678	304	0.0225055	1	0.131539	0.895349	0.0480078	0.153835	0.144936
TCGA-G4-6588-01A-11H-1773-13	COAD	MIR431	hsa-mir-431	chr14	+	3p	100881065	COSM469661	loop	3p	NA	19	NA	G	A	23.4358	67.2009	72	4.47609e-19	2.39471e-16	-1.43646	0.150871	0.821394	0.107729	0.320878
TCGA-QR-A6H5-01A-11R-A35M-13	PCPG	MIR433	hsa-mir-433	chr14	+	3p	100881893	NA	flanking-5	3p	NA	NA	-4	G	A	222.925	414.428	162	1.92675e-13	1.03081e-10	0.630977	0.528056	0.27732	0.138739	0.102973
TCGA-N5-A4RA-01A-11R-A28Z-13	UCS	MIR452	hsa-mir-452	chrX	-	5p	151959619	NA	flanking-3	5p	NA	NA	15	A	G	44.5323	74.5283	41	7.04806e-13	3.77071e-10	-1.61676	0.10593	0.974981	0.038686	0.158739
TCGA-2H-A9GM-01A-11R-A37J-13	ESCA	MIR452	hsa-mir-452	chrX	-	5p	151959660	NA	loop	5p	NA	18	NA	A	C	109.028	166.114	160	1.02343e-23	5.47534e-21	-0.939651	0.347397	0.459174	0.075156	0.160676
TCGA-B7-5816-01A-21R-1602-13	STAD	MIR452	hsa-mir-452	chrX	-	5p	151959620	NA	flanking-3	5p	NA	NA	14	G	T	62.848	76.3208	273	7.21143e-30	3.85811e-27	-0.777967	0.436589	0.359928	0.109093	0.181831
TCGA-G3-A5SM-01A-12R-A28Z-13	LIHC	MIR452	hsa-mir-452	chrX	-	5p	151959683	COSN16303043	non-seed duplex_5p	5p	17	NA	NA	T	A	106.371	283.602	343	9.39358e-24	5.02556e-21	0.585626	0.558127	0.253267	0.204644	0.15383
TCGA-D7-A6EY-01A-21R-A31Q-13	STAD	MIR455	hsa-mir-455	chr9	+	both	114209428	NA	flanking-5	3p	NA	NA	-21	C	T	81.9076	290.669	399	4.31415e-71	2.30807e-68	-1.10514	0.269098	0.570089	0.109691	0.224493
TCGA-WE-AAA3-06A-11R-A38N-13	SKCM	MIR455	hsa-mir-455	chr9	+	both	114209435	NA	flanking-5	3p	NA	NA	-14	C	T	131.747	471.169	446	1.45061e-68	7.76075e-66	-0.994612	0.319925	0.494952	0.132989	0.274811
TCGA-61-1911-01A-01R-1567-13	OV	MIR4728	hsa-mir-4728	chr17	+	both	39726473	NA	flanking-5	3p	NA	NA	-23	T	G	21.8565	125.008	266	9.24694e-12	4.94711e-09	-0.437486	0.661759	0.1793	0.17286	0.222353
TCGA-37-3789-01A-01T-0981-13	LUSC	MIR495	hsa-mir-495	chr14	+	3p	101033788	COSN2378433	non-seed duplex_5p	3p	21	NA	NA	C	T	54.3127	29.7185	30	0.331224	1	0.180422	0.856822	0.0671096	0.321361	0.299552
TCGA-XE-AANJ-01A-11R-A43A-13	TGCT	MIR495	hsa-mir-495	chr14	+	3p	101033752	NA	flanking-5	3p	NA	NA	-16	C	T	230.807	235.394	149	0.775089	1	0.0234503	0.981291	0.00820216	0.145151	0.143547
TCGA-D1-A174-01A-11R-A12H-13	UCEC	MIR497	hsa-mir-497	chr17	-	5p	7017924	NA	flanking-3	5p	NA	NA	14	TC	T	118.675	95.5979	431	6.64107e-66	3.55297e-63	0.990203	0.322075	0.492043	0.287745	0.190596
TCGA-D8-A1JN-01A-11R-A13P-13	BRCA	MIR500A	hsa-mir-500a	chrX	+	3p	50008509	NA	flanking-3	3p	NA	NA	6	G	A	54.2418	299.391	1072	3.39302e-187	1.81527e-184	1.10192	0.270495	0.567841	0.184727	0.1158
TCGA-B5-A0JV-01A-11R-A103-13	UCEC	MIR500A	hsa-mir-500a	chrX	+	3p	50008517	NA	flanking-3	3p	NA	NA	14	C	T	99.8525	630	521	4.29862e-62	2.29976e-59	0.837516	0.402302	0.395447	0.175295	0.119493
TCGA-AA-3833-01A-01T-0906-13	COAD	MIR500A	hsa-mir-500a	chrX	+	3p	50008509	NA	flanking-3	3p	NA	NA	6	G	A	160.908	561.801	433	5.64854e-43	3.02197e-40	0.740137	0.459217	0.337982	0.161089	0.114139
TCGA-ER-A19S-06A-11R-A18X-13	SKCM	MIR500A	hsa-mir-500a	chrX	+	3p	50008447	COSN1085194	seed_5p	5p	5	NA	NA	C	T	46.5387	65.8256	243	7.10991e-23	3.8038e-20	-0.701365	0.483075	0.315985	0.12478	0.235237
TCGA-GK-A6C7-01A-11R-A33A-13	KIRC	MIR500A	hsa-mir-500a	chrX	+	3p	50008524	NA	flanking-3	3p	NA	NA	21	G	T	254.091	294.272	499	3.47322e-36	1.85817e-33	-0.61026	0.541689	0.26625	0.069202	0.105903
TCGA-ER-A19S-06A-11R-A18X-13	SKCM	MIR500A	hsa-mir-500a	chrX	+	3p	50008447	COSN1085194	seed_5p	3p	5	NA	NA	C	T	2495.39	1900.87	448	4.071e-18	2.17799e-15	-0.428079	0.668594	0.174838	0.0976149	0.164273
TCGA-AX-A05S-01A-11R-A00W-13	UCEC	MIR500A	hsa-mir-500a	chrX	+	3p	50008455	COSN503234	non-seed duplex_5p	3p	13	NA	NA	C	A	387.299	630	521	2.66771e-12	1.42723e-09	0.313928	0.753575	0.122873	0.140409	0.119493
TCGA-E6-A1M0-01A-11R-A143-13	UCEC	MIR500A	hsa-mir-500a	chrX	+	3p	50008523	NA	flanking-3	3p	NA	NA	20	C	T	574.477	630	521	6.77353e-11	3.62384e-08	-0.29199	0.770294	0.113344	0.100039	0.119493
TCGA-05-4390-01A-02T-1754-13	LUAD	MIR500A	hsa-mir-500a	chrX	+	3p	50008488	COSN24409322	seed_3p	3p	7	NA	NA	C	A	219.637	295.304	509	9.93278e-09	5.31404e-06	0.258355	0.796133	0.0990144	0.144938	0.126301
TCGA-FR-A3YO-06A-11R-A23A-13	SKCM	MIR500A	hsa-mir-500a	chrX	+	3p	50008523	NA	flanking-3	3p	NA	NA	20	C	T	756.079	1900.87	448	0.00133985	0.716818	0.152493	0.878798	0.0561109	0.188018	0.164273
TCGA-B5-A11N-01A-11R-A119-13	UCEC	MIR500B	hsa-mir-500b	chrX	+	5p	50010761	NA	flanking-3	5p	NA	NA	20	C	T	27.3071	43.105	40	0.0369604	1	-0.341562	0.73268	0.135086	0.084663	0.111651
TCGA-52-7622-01A-11H-2124-13	LUSC	MIR501	hsa-mir-501	chrX	+	3p	50009808	NA	flanking-3	3p	NA	NA	15	C	A	77.4363	102.106	455	8.51199e-47	4.55391e-44	-0.758267	0.448291	0.34844	0.106124	0.178534
TCGA-49-AARE-01A-11H-A41D-13	LUAD	MIR501	hsa-mir-501	chrX	+	3p	50009815	NA	flanking-3	3p	NA	NA	22	G	A	59.61	92.587	477	0.649612	1	0.0208142	0.983394	0.0072725	0.220965	0.218423
TCGA-DD-A1EK-01A-11R-A214-13	LIHC	MIR502	hsa-mir-502	chrX	+	3p	50014594	NA	flanking-5	3p	NA	NA	-19	G	A	31.2554	32.9497	51	3.41983e-12	1.82961e-09	-1.27495	0.202328	0.693943	0.148265	0.302115
TCGA-CD-A4MG-01A-11R-A252-13	STAD	MIR505	hsa-mir-505	chrX	-	3p	139924147	NA	flanking-3	3p	NA	NA	13	C	T	47.4804	76.7845	324	2.97426e-28	1.59123e-25	0.675336	0.499462	0.301497	0.346537	0.272875
TCGA-BG-A0MI-01A-11R-A041-13	UCEC	MIR505	hsa-mir-505	chrX	-	3p	139924225	NA	flanking-5	3p	NA	NA	-8	G	T	76.3312	138.289	517	1.58792e-21	8.49535e-19	-0.438445	0.661064	0.179756	0.220714	0.276764
TCGA-D5-6540-01A-11H-1722-13	COAD	MIR511	hsa-mir-511	chr10	+	3p	17845111	NA	flanking-5	5p	NA	NA	-11	A	T	21.4243	31.5316	58	2.92137e-17	1.56293e-14	-1.5781	0.114543	0.94103	0.0684734	0.345273
TCGA-EE-A20C-06A-11R-A18V-13	SKCM	MIR511	hsa-mir-511	chr10	+	3p	17845147	NA	loop	5p	NA	5	NA	A	T	18.5831	49.4233	219	4.82208e-19	2.57981e-16	-0.662727	0.507506	0.294559	0.126026	0.201919
TCGA-DA-A95V-06A-11R-A37G-13	SKCM	MIR513C	hsa-mir-513c	chrX	-	both	147189702	NA	flanking-3	5p	NA	NA	15	C	A	57.7418	117.8	268	8.36848e-07	0.000447714	0.308208	0.757924	0.120374	0.276864	0.220903
TCGA-53-7624-01A-11H-2065-13	LUAD	MIR518E	hsa-mir-518e	chr19	+	5p	53729922	NA	flanking-3	5p	NA	NA	11	G	A	4848.86	206.944	21	9.93982e-08	5.3178e-05	-1.7638	0.077766	1.10921	0.161569	0.372279
TCGA-QK-A8Z8-01A-11R-A39B-13	HNSC	MIR519C	hsa-mir-519c	chr19	+	both	53686464	NA	flanking-5	5p	NA	NA	-20	G	A	25.2461	43.0037	35	0.000210155	0.112433	-0.701497	0.482993	0.316059	0.167105	0.258535
TCGA-EE-A182-06A-11R-A18W-13	SKCM	MIR519D	hsa-mir-519d	chr19	+	3p	53713381	COSN5028201	non-seed duplex_5p	3p	21	NA	NA	C	T	21.718	55.4515	22	3.68443e-05	0.0197117	1.11008	0.266963	0.57355	0.542787	0.361238
TCGA-EE-A3AG-06A-31R-A18V-13	SKCM	MIR520A	hsa-mir-520a	chr19	+	both	53690978	NA	flanking-3	5p	NA	NA	24	G	A	252.057	64.9442	22	1.39057e-06	0.000743955	1.41787	0.156228	0.806242	0.455392	0.270906
TCGA-EE-A3AG-06A-31R-A18V-13	SKCM	MIR520A	hsa-mir-520a	chr19	+	both	53690978	NA	flanking-3	3p	NA	NA	24	G	A	903.422	79.4795	28	0.171712	1	-0.265335	0.790752	0.10196	0.105161	0.136815
TCGA-D9-A1JX-06A-11R-A18V-13	SKCM	MIR520A	hsa-mir-520a	chr19	+	both	53690957	COSN15625239	flanking-3	3p	NA	NA	3	C	T	36.0999	79.4795	28	0.876241	1	0.0297119	0.976297	0.0104181	0.14036	0.136815
TCGA-20-0991-01A-01R-1564-13	OV	MIR522	hsa-mir-522	chr19	+	3p	53751223	NA	flanking-5	5p	NA	NA	-3	T	A	92.8939	71.6781	143	7.81227e-38	4.17957e-35	1.48314	0.138036	0.860006	0.52842	0.336833
TCGA-DK-A1AC-01A-11R-A13X-13	BLCA	MIR523	hsa-mir-523	chr19	+	5p	53698419	COSN513937	non-seed duplex_5p	5p	20	NA	NA	C	T	580.052	168.906	57	5.47387e-10	2.92852e-07	-0.991357	0.321511	0.492804	0.150828	0.293942
TCGA-5M-AAT6-01A-11H-A41D-13	COAD	MIR532	hsa-mir-532	chrX	+	5p	50003232	NA	flanking-3	5p	NA	NA	7	C	T	787.277	1718.46	433	1.69402e-199	9.06298e-197	2.68017	0.00735847	2.13321	0.158108	0.0646398
TCGA-AO-A03T-01A-21R-A035-13	BRCA	MIR532	hsa-mir-532	chrX	+	5p	50003161	COSN23017652	flanking-5	3p	NA	NA	-6	C	G	27.7484	52.0919	496	3.8518e-89	2.06071e-86	-1.11626	0.264312	0.577883	0.0688793	0.187815
TCGA-G2-A2ES-01A-11R-A17X-13	BLCA	MIR532	hsa-mir-532	chrX	+	5p	50003192	COSN514219	loop	3p	NA	4	NA	C	T	34.8261	38.5825	206	1.02195e-29	5.46744e-27	-0.931278	0.35171	0.453816	0.0650973	0.149347
TCGA-BH-A0E9-01B-11R-A114-13	BRCA	MIR532	hsa-mir-532	chrX	+	5p	50003149	NA	flanking-5	5p	NA	NA	-18	G	T	681.082	796.519	1072	3.10326e-61	1.66025e-58	-0.53825	0.590404	0.22885	0.05677	0.0836712
TCGA-5M-AAT6-01A-11H-A41D-13	COAD	MIR532	hsa-mir-532	chrX	+	5p	50003232	NA	flanking-3	3p	NA	NA	7	C	T	49.7844	108.368	413	3.22412e-24	1.7249e-21	-0.532877	0.594119	0.226127	0.121226	0.175481
TCGA-G2-A2ES-01A-11R-A17X-13	BLCA	MIR532	hsa-mir-532	chrX	+	5p	50003192	COSN514219	loop	5p	NA	4	NA	C	T	897.118	893.563	405	2.60398e-21	1.39313e-18	0.49871	0.617984	0.209023	0.101091	0.0760623
TCGA-AO-A03T-01A-21R-A035-13	BRCA	MIR532	hsa-mir-532	chrX	+	5p	50003161	COSN23017652	flanking-5	5p	NA	NA	-6	C	G	765.447	796.519	1072	6.03834e-41	3.23051e-38	-0.427146	0.669273	0.174397	0.0623228	0.0836712
TCGA-85-A4CN-01A-11H-A24G-13	LUSC	MIR542	hsa-mir-542	chrX	-	3p	134541430	NA	flanking-5	3p	NA	NA	-8	G	T	241.836	252.844	466	2.16423e-110	1.15786e-107	-1.38542	0.165924	0.780091	0.0369623	0.124232
TCGA-AA-3509-01A-01T-1409-13	COAD	MIR582	hsa-mir-582	chr5	-	5p	59703625	COSN18166678	flanking-3	3p	NA	NA	5	C	G	250.083	317.305	433	2.06421e-08	1.10435e-05	-0.274573	0.783645	0.105881	0.15078	0.177133
TCGA-BR-A4J5-01A-21R-A252-13	STAD	MIR582	hsa-mir-582	chr5	-	5p	59703656	NA	loop	3p	NA	10	NA	T	A	155.631	308.166	423	0.016857	1	0.11666	0.907129	0.0423309	0.213878	0.201594
TCGA-D8-A1JK-01A-11R-A13P-13	BRCA	MIR589	hsa-mir-589	chr7	-	5p	5495844	COSN23017036	non-seed duplex_3p	5p	14	NA	NA	G	C	119.089	95.2916	1057	2.92999e-204	1.56754e-201	1.18835	0.234696	0.629495	0.277956	0.162648
TCGA-77-A5G6-01A-11H-A27R-13	LUSC	MIR598	hsa-mir-598	chr8	-	3p	11035292	NA	flanking-5	3p	NA	NA	-13	C	A	34.9226	40.1958	220	2.10713e-63	1.12732e-60	1.62195	0.104813	0.979584	0.239818	0.125983
TCGA-FR-A8YC-06A-11R-A37G-13	SKCM	MIR598	hsa-mir-598	chr8	-	3p	11035210	NA	flanking-3	3p	NA	NA	11	G	A	71.5547	67.89	299	3.59394e-07	0.000192276	-0.301096	0.763341	0.117281	0.0786777	0.136421
TCGA-FS-A4F0-06A-11R-A24Y-13	SKCM	MIR598	hsa-mir-598	chr8	-	3p	11035250	NA	loop	3p	NA	7	NA	A	G	124.157	67.89	299	0.943716	1	0.00408635	0.99674	0.0014183	0.137204	0.136421
TCGA-BC-A5W4-01A-11R-A28Z-13	LIHC	MIR629	hsa-mir-629	chr15	-	5p	70079371	NA	flanking-3	5p	NA	NA	16	C	A	28.6973	122.018	337	2.04459e-22	1.09386e-19	-0.570767	0.568157	0.245531	0.125648	0.180978
TCGA-78-7166-01A-12H-2065-13	LUAD	MIR629	hsa-mir-629	chr15	-	5p	70079457	NA	flanking-5	5p	NA	NA	-10	C	A	87.2379	182.001	508	1.4567e-27	7.79335e-25	0.512526	0.608283	0.215894	0.200826	0.157161
TCGA-G3-A25S-01A-11R-A16S-13	LIHC	MIR629	hsa-mir-629	chr15	-	5p	70079433	COSN16303140	non-seed duplex_5p	5p	15	NA	NA	C	A	156.352	123.107	337	5.61264e-12	3.00276e-09	0.389233	0.697104	0.156703	0.218642	0.180912
TCGA-CN-A497-01A-11R-A24J-13	HNSC	MIR6510	hsa-mir-6510	chr17	-	3p	41517236	NA	flanking-5	3p	NA	NA	-21	GC	G	46.3795	46.4246	153	3.73016e-06	0.00199564	-0.388213	0.697859	0.156232	0.161794	0.20021
TCGA-NC-A5HD-01A-11H-A26V-13	LUSC	MIR652	hsa-mir-652	chrX	+	3p	110055341	NA	flanking-5	3p	NA	NA	-8	G	A	59.1744	102.705	465	0.000621455	0.332479	-0.159788	0.873048	0.058962	0.154653	0.169529
TCGA-D3-A8GB-06A-11R-A37G-13	SKCM	MIR654	hsa-mir-654	chr14	+	3p	101040262	COSN15625305	loop	3p	NA	7	NA	C	T	41.7706	73.1401	189	4.42141e-08	2.36545e-05	-0.415099	0.67807	0.168726	0.138777	0.178691
TCGA-V5-A7RB-01A-11R-A353-13	ESCA	MIR660	hsa-mir-660	chrX	+	5p	50013286	NA	loop	5p	NA	9	NA	C	G	81.3808	77.2289	177	2.0844e-34	1.11515e-31	1.15662	0.247429	0.606549	0.176232	0.104858
TCGA-AA-3815-01A-01T-1021-13	COAD	MIR660	hsa-mir-660	chrX	+	5p	50013252	NA	flanking-5	5p	NA	NA	-4	C	T	44.1483	74.9112	407	7.83581e-60	4.19216e-57	0.961965	0.336067	0.473574	0.275496	0.170903
TCGA-AP-A1E1-01A-11R-A136-13	UCEC	MIR660	hsa-mir-660	chrX	+	5p	50013284	NA	loop	5p	NA	7	NA	C	T	192.141	89.9479	504	6.65746e-24	3.56174e-21	-0.473	0.636213	0.196397	0.104758	0.14689
TCGA-66-2787-01A-01T-0981-13	LUSC	MIR664A	hsa-mir-664a	chr1	-	both	220200538	NA	flanking-3	3p	NA	NA	11	T	G	20.2581	50.8731	237	5.16576e-24	2.76368e-21	0.735293	0.462161	0.335206	0.272302	0.195583
TCGA-NH-A50V-01A-11H-A28I-13	COAD	MIR708	hsa-mir-708	chr11	-	5p	79402008	NA	flanking-3	5p	NA	NA	24	T	A	32.858	30.7051	171	1.24586e-26	6.66535e-24	-0.97696	0.328589	0.483347	0.062429	0.171546
TCGA-NH-A50V-01A-11H-A28I-13	COAD	MIR708	hsa-mir-708	chr11	-	5p	79402008	NA	flanking-3	3p	NA	NA	24	T	A	68.6472	71.7656	351	4.103e-49	2.1951e-46	-0.926274	0.354304	0.450624	0.109659	0.221243
TCGA-AJ-A3BG-01A-11R-A19V-13	UCEC	MIR744	hsa-mir-744	chr17	+	5p	12081958	NA	loop	3p	NA	28	NA	C	T	47.1074	90.5825	461	2.25677e-85	1.20737e-82	1.14037	0.25413	0.594943	0.276942	0.158567
TCGA-AP-A0LE-01A-11R-A103-13	UCEC	MIR744	hsa-mir-744	chr17	+	5p	12082007	NA	flanking-3	5p	NA	NA	20	C	T	93.3908	80.1699	484	1.88037e-64	1.006e-61	0.901263	0.367448	0.434804	0.232089	0.156103
TCGA-IA-A83S-01A-11R-A359-13	KIRP	MIR744	hsa-mir-744	chr17	+	5p	12081900	NA	flanking-5	5p	NA	NA	-9	TG	T	41.7071	57.6795	256	1.22797e-29	6.56961e-27	0.806108	0.42018	0.376564	0.194679	0.137533
TCGA-AJ-A3BG-01A-11R-A19V-13	UCEC	MIR744	hsa-mir-744	chr17	+	5p	12081958	NA	loop	5p	NA	28	NA	C	T	33.2107	80.1699	484	2.16161e-43	1.15646e-40	-0.695641	0.486654	0.31278	0.0974524	0.156103
TCGA-AP-A0LE-01A-11R-A103-13	UCEC	MIR744	hsa-mir-744	chr17	+	5p	12082007	NA	flanking-3	3p	NA	NA	20	C	T	70.335	90.5825	461	4.50545e-27	2.41041e-24	-0.535573	0.592253	0.227492	0.102972	0.158567
TCGA-A5-A2K3-01A-11R-A17X-13	UCEC	MIR874	hsa-mir-874	chr5	-	3p	137647608	NA	loop	3p	NA	10	NA	C	T	42.907	82.9705	409	1.80071e-90	9.6338e-88	1.30741	0.191075	0.718797	0.312847	0.188687
TCGA-90-7766-01A-21H-2124-13	LUSC	MIR891A	hsa-mir-891a	chrX	-	5p	146027834	NA	loop	5p	NA	7	NA	T	C	1253.38	128.295	114	0.00200991	1	0.296182	0.767091	0.115153	0.178167	0.148216
TCGA-EE-A20F-06A-21R-A18V-13	SKCM	MIR891A	hsa-mir-891a	chrX	-	5p	146027838	NA	loop	5p	NA	3	NA	G	A	23.5684	138.905	165	0.0643985	1	0.144953	0.884748	0.0531805	0.171032	0.151415
TCGA-55-8092-01A-11H-2240-13	LUAD	MIR93	hsa-mir-93	chr7	-	5p	100093770	NA	flanking-3	5p	NA	NA	7	G	A	3171.22	4632.59	509	3.05747e-14	1.63574e-11	0.346649	0.728855	0.137359	0.059202	0.0464805
TCGA-AG-A02N-01A-11R-A082-13	READ	MIR93	hsa-mir-93	chr7	-	5p	100093770	NA	flanking-3	5p	NA	NA	7	G	A	9664.46	7579.15	153	0.000134843	0.0721409	-0.31671	0.751463	0.124092	0.0407104	0.0506106
TCGA-EE-A183-06A-11R-A18V-13	SKCM	MIR93	hsa-mir-93	chr7	-	5p	100093771	NA	flanking-3	5p	NA	NA	6	G	A	4179.75	16473.6	449	0.000116108	0.0621176	-0.183513	0.854395	0.0683411	0.0421136	0.0746436
TCGA-AG-A02N-01A-11R-A082-13	READ	MIR93	hsa-mir-93	chr7	-	5p	100093770	NA	flanking-3	3p	NA	NA	7	G	A	23.0616	82.3834	84	0.898954	1	-0.0138975	0.988912	0.00484245	0.325092	0.326579
TCGA-ED-A459-01A-11R-A25Z-13	LIHC	MIR98	hsa-mir-98	chrX	-	5p	53556227	NA	flanking-3	5p	NA	NA	14	T	A	145.091	95.4689	351	2.85297e-53	1.52634e-50	-0.9808	0.326692	0.485862	0.0975001	0.188517
TCGA-G4-6628-01A-11H-1838-13	COAD	MIR99A	hsa-mir-99a	chr21	+	5p	16539135	NA	loop	5p	NA	13	NA	G	A	174.93	242.371	424	2.94437e-71	1.57524e-68	-1.05963	0.289313	0.538632	0.034264	0.141396
TCGA-CK-5913-01A-11H-1652-13	COAD	MIR99A	hsa-mir-99a	chr21	+	5p	16539135	NA	loop	5p	NA	13	NA	G	A	51.6502	242.371	424	8.6356e-31	4.62005e-28	-0.60777	0.54334	0.264928	0.0799485	0.141396
TCGA-5M-AAT6-01A-11H-A41D-13	COAD	MIR99A	hsa-mir-99a	chr21	+	5p	16539077	NA	flanking-5	5p	NA	NA	-24	T	C	394.902	242.371	424	5.59094e-12	2.99115e-09	-0.344417	0.730533	0.13636	0.106574	0.141396
TCGA-LN-A4MQ-01A-11R-A28K-13	ESCA	MIR99B	hsa-mir-99b	chr19	+	5p	51692653	NA	loop	5p	NA	14	NA	A	G	7672.03	11876.3	182	2.06207e-36	1.10321e-33	1.18418	0.236343	0.626458	0.121102	0.0695073
TCGA-BP-4987-01A-01R-1762-13	KIRC	MIR99B	hsa-mir-99b	chr19	+	5p	51692651	COSN2375503	loop	5p	NA	12	NA	G	A	47976.3	31042.4	499	6.21571e-51	3.3254e-48	0.756132	0.44957	0.347202	0.147824	0.0935723
TCGA-LN-A4MQ-01A-11R-A28K-13	ESCA	MIR99B	hsa-mir-99b	chr19	+	5p	51692653	NA	loop	3p	NA	14	NA	A	G	41.6329	87.2251	177	7.78752e-18	4.16632e-15	-0.722151	0.470202	0.327716	0.105976	0.167729
TCGA-G4-6304-01A-11H-1927-13	COAD	MIR99B	hsa-mir-99b	chr19	+	5p	51692648	COSN1082437	loop	5p	NA	9	NA	G	A	14972.2	22344.7	432	6.24643e-40	3.34184e-37	-0.707164	0.479465	0.319243	0.0442828	0.0950384
TCGA-BP-4987-01A-01R-1762-13	KIRC	MIR99B	hsa-mir-99b	chr19	+	5p	51692651	COSN2375503	loop	3p	NA	12	NA	G	A	101.147	144.853	498	6.64086e-41	3.55286e-38	-0.658991	0.509901	0.292514	0.109277	0.172874
TCGA-ER-A19E-06A-11R-A18V-13	SKCM	MIR99B	hsa-mir-99b	chr19	+	5p	51692600	NA	flanking-5	3p	NA	NA	-18	C	T	355.757	319.348	442	2.74012e-30	1.46597e-27	-0.587308	0.556997	0.254147	0.154815	0.249824
TCGA-ER-A19E-06A-11R-A18V-13	SKCM	MIR99B	hsa-mir-99b	chr19	+	5p	51692600	NA	flanking-5	5p	NA	NA	-18	C	T	105391	62022.7	447	1.76351e-06	0.000943476	-0.229085	0.818803	0.0868206	0.0990756	0.129229
TCGA-G4-6304-01A-11H-1927-13	COAD	MIR99B	hsa-mir-99b	chr19	+	5p	51692648	COSN1082437	loop	3p	NA	9	NA	G	A	54.257	126.971	426	0.00890039	1	0.127326	0.898682	0.0463937	0.258625	0.238941
TCGA-C8-A12K-01A-21R-A114-13	BRCA	MIRLET7B	hsa-let-7b	chr22	+	5p	46113723	NA	loop	3p	NA	11	NA	G	A	228.284	166.987	1064	9.72749e-183	5.20421e-180	-1.08856	0.276347	0.558546	0.0144424	0.118744
TCGA-C8-A12K-01A-21R-A114-13	BRCA	MIRLET7B	hsa-let-7b	chr22	+	5p	46113723	NA	loop	5p	NA	11	NA	G	A	47932.7	30765.6	1073	1.03885e-29	5.55786e-27	-0.356271	0.721637	0.141681	0.117303	0.156318
TCGA-34-2600-01A-01T-1557-13	LUSC	MIRLET7C	hsa-let-7c	chr21	+	5p	16539908	COSN2378764	flanking-3	5p	NA	NA	4	G	C	7332.27	1863.45	466	2.19048e-88	1.17191e-85	1.16139	0.245485	0.609975	0.269419	0.155873
TCGA-B6-A0RT-01A-21R-A085-13	BRCA	MIRLET7C	hsa-let-7c	chr21	+	5p	16539919	NA	flanking-3	5p	NA	NA	15	A	C	4217.5	3044.67	1073	3.80533e-121	2.03585e-118	0.816526	0.414199	0.382791	0.259972	0.155047
TCGA-34-2600-01A-01T-1557-13	LUSC	MIRLET7C	hsa-let-7c	chr21	+	5p	16539908	COSN2378764	flanking-3	3p	NA	NA	4	G	C	43.3072	37.4454	106	4.18264e-13	2.23771e-10	-0.804493	0.421113	0.375602	0.096003	0.204654
TCGA-AA-3833-01A-01T-0906-13	COAD	MIRLET7C	hsa-let-7c	chr21	+	5p	16539833	NA	flanking-5	5p	NA	NA	-5	C	T	662.254	875.969	433	4.6304e-06	0.00247726	0.222975	0.823555	0.0843074	0.20022	0.172995
TCGA-B5-A5OC-01A-21R-A27R-13	UCEC	MIRLET7D	hsa-let-7d	chr9	+	5p	94178817	NA	flanking-5	5p	NA	NA	-24	GA	G	171.048	443.664	508	2.44708e-124	1.30919e-121	1.42532	0.154065	0.812297	0.238493	0.124733
TCGA-D1-A0ZS-01A-11R-A119-13	UCEC	MIRLET7D	hsa-let-7d	chr9	+	5p	94178817	NA	flanking-5	3p	NA	NA	-24	G	GA	568.012	592.385	508	2.19085e-111	1.17211e-108	-1.30216	0.192861	0.714755	0.0267818	0.163006
TCGA-AX-A2HG-01A-11R-A17A-13	UCEC	MIRLET7D	hsa-let-7d	chr9	+	5p	94178817	NA	flanking-5	5p	NA	NA	-24	GA	G	302.749	443.664	508	8.0308e-106	4.29648e-103	-1.25021	0.211223	0.675259	0.0249484	0.124733
TCGA-CM-6162-01A-11H-1652-13	COAD	MIRLET7D	hsa-let-7d	chr9	+	5p	94178817	NA	flanking-5	3p	NA	NA	-24	GA	G	1135.81	725.92	432	2.18316e-82	1.16799e-79	-1.16486	0.244076	0.612475	0.0450512	0.149399
TCGA-B5-A5OC-01A-21R-A27R-13	UCEC	MIRLET7D	hsa-let-7d	chr9	+	5p	94178817	NA	flanking-5	3p	NA	NA	-24	GA	G	188.505	592.385	508	1.01132e-94	5.41057e-92	-1.14792	0.251002	0.600322	0.0429178	0.163006
TCGA-AP-A1DR-01A-11R-A136-13	UCEC	MIRLET7D	hsa-let-7d	chr9	+	5p	94178817	NA	flanking-5	3p	NA	NA	-24	GA	G	528.004	592.385	508	4.72022e-84	2.52532e-81	-1.05079	0.293355	0.532606	0.0530787	0.163006
TCGA-CM-6162-01A-11H-1652-13	COAD	MIRLET7D	hsa-let-7d	chr9	+	5p	94178817	NA	flanking-5	5p	NA	NA	-24	GA	G	275.773	308.947	432	9.38885e-69	5.02303e-66	-1.01896	0.308221	0.511138	0.0575582	0.155274
TCGA-BK-A13B-01A-51R-A22I-13	UCEC	MIRLET7D	hsa-let-7d	chr9	+	5p	94178817	NA	flanking-5	5p	NA	NA	-24	G	GA	116.413	443.664	508	1.98622e-74	1.06263e-71	-0.963597	0.335248	0.474634	0.0478242	0.124733
TCGA-AX-A2HJ-01A-11R-A17A-13	UCEC	MIRLET7D	hsa-let-7d	chr9	+	5p	94178817	NA	flanking-5	3p	NA	NA	-24	GA	G	537.049	592.385	508	4.87434e-74	2.60777e-71	0.960064	0.337023	0.47234	0.263443	0.163006
TCGA-DF-A2KY-01A-21R-A214-13	UCEC	MIRLET7D	hsa-let-7d	chr9	+	5p	94178817	NA	flanking-5	3p	NA	NA	-24	GA	G	1902.5	592.385	508	8.90595e-74	4.76468e-71	0.957692	0.338218	0.470803	0.263194	0.163006
TCGA-AP-A1DM-01A-21R-A136-13	UCEC	MIRLET7D	hsa-let-7d	chr9	+	5p	94178817	NA	flanking-5	5p	NA	NA	-24	GA	G	336.318	443.664	508	1.16899e-61	6.25412e-59	-0.847352	0.396799	0.401429	0.0571022	0.124733
TCGA-AX-A063-01A-11R-A00W-13	UCEC	MIRLET7D	hsa-let-7d	chr9	+	5p	94178817	NA	flanking-5	5p	NA	NA	-24	GA	G	283.668	443.664	508	3.86113e-58	2.0657e-55	0.814968	0.415091	0.381857	0.189779	0.124733
TCGA-VQ-AA6D-01A-11R-A415-13	STAD	MIRLET7D	hsa-let-7d	chr9	+	5p	94178817	NA	flanking-5	5p	NA	NA	-24	GA	G	348.96	291.636	422	7.61859e-40	4.07594e-37	-0.716361	0.473768	0.324434	0.0868386	0.153705
TCGA-BS-A0V4-01A-11R-A14C-13	UCEC	MIRLET7D	hsa-let-7d	chr9	+	5p	94178817	NA	flanking-5	5p	NA	NA	-24	GA	G	340.253	443.664	508	9.31081e-46	4.98128e-43	0.698515	0.484855	0.314388	0.180484	0.124733
TCGA-VQ-A8PO-01A-11R-A415-13	STAD	MIRLET7D	hsa-let-7d	chr9	+	5p	94178817	NA	flanking-5	3p	NA	NA	-24	GA	G	559.249	339.292	422	8.75448e-38	4.68365e-35	-0.692575	0.488576	0.311068	0.0874153	0.151759
TCGA-BK-A13B-01A-51R-A22I-13	UCEC	MIRLET7D	hsa-let-7d	chr9	+	5p	94178817	NA	flanking-5	3p	NA	NA	-24	G	GA	188.874	592.385	508	1.0274e-40	5.4966e-38	-0.649363	0.516104	0.287263	0.0950736	0.163006
TCGA-EO-A3AU-01A-21R-A19V-13	UCEC	MIRLET7D	hsa-let-7d	chr9	+	5p	94178817	NA	flanking-5	3p	NA	NA	-24	GA	G	360.127	592.385	508	7.80871e-39	4.17766e-36	-0.630664	0.52826	0.277152	0.0970298	0.163006
TCGA-VQ-AA6D-01A-11R-A415-13	STAD	MIRLET7D	hsa-let-7d	chr9	+	5p	94178817	NA	flanking-5	3p	NA	NA	-24	GA	G	418.428	339.292	422	4.70487e-32	2.51711e-29	-0.624796	0.532105	0.274002	0.0937124	0.151759
TCGA-EO-A3AU-01A-21R-A19V-13	UCEC	MIRLET7D	hsa-let-7d	chr9	+	5p	94178817	NA	flanking-5	5p	NA	NA	-24	GA	G	235.121	443.664	508	9.91096e-38	5.30236e-35	-0.619584	0.535531	0.271215	0.0752812	0.124733
TCGA-AJ-A3BG-01A-11R-A19V-13	UCEC	MIRLET7D	hsa-let-7d	chr9	+	5p	94178817	NA	flanking-5	5p	NA	NA	-24	GAA	G	189.275	443.664	508	1.02956e-35	5.50814e-33	-0.59911	0.5491	0.260349	0.0769154	0.124733
TCGA-EY-A2OP-01A-11R-A19V-13	UCEC	MIRLET7D	hsa-let-7d	chr9	+	5p	94178817	NA	flanking-5	5p	NA	NA	-24	GA	G	420.283	443.664	508	6.35368e-35	3.39922e-32	0.590998	0.554522	0.256081	0.171903	0.124733
TCGA-AD-A5EJ-01A-11H-A28I-13	COAD	MIRLET7D	hsa-let-7d	chr9	+	5p	94178817	NA	flanking-5	5p	NA	NA	-24	GA	G	243.208	308.947	432	1.52473e-26	8.15733e-24	-0.549118	0.582925	0.234387	0.102615	0.155274
TCGA-AX-A2HJ-01A-11R-A17A-13	UCEC	MIRLET7D	hsa-let-7d	chr9	+	5p	94178817	NA	flanking-5	5p	NA	NA	-24	GA	G	345.015	443.664	508	3.48052e-28	1.86208e-25	-0.519395	0.603486	0.219333	0.0832778	0.124733
TCGA-EY-A2OP-01A-11R-A19V-13	UCEC	MIRLET7D	hsa-let-7d	chr9	+	5p	94178817	NA	flanking-5	3p	NA	NA	-24	GA	G	694.317	592.385	508	1.54281e-27	8.25406e-25	-0.512249	0.608477	0.215756	0.109418	0.163006
TCGA-AX-A3FT-01A-11R-A22I-13	UCEC	MIRLET7D	hsa-let-7d	chr9	+	5p	94178817	NA	flanking-5	3p	NA	NA	-24	GA	G	476.308	592.385	508	5.53102e-22	2.9591e-19	-0.448205	0.654005	0.184419	0.116118	0.163006
TCGA-DF-A2KY-01A-21R-A214-13	UCEC	MIRLET7D	hsa-let-7d	chr9	+	5p	94178817	NA	flanking-5	5p	NA	NA	-24	GA	G	778.57	443.664	508	9.81041e-11	5.24857e-08	-0.293231	0.769346	0.113878	0.101329	0.124733
TCGA-AX-A063-01A-11R-A00W-13	UCEC	MIRLET7D	hsa-let-7d	chr9	+	5p	94178817	NA	flanking-5	3p	NA	NA	-24	GA	G	282.631	592.385	508	1.14046e-10	6.10148e-08	-0.292155	0.770168	0.113414	0.132443	0.163006
TCGA-VQ-A8PO-01A-11R-A415-13	STAD	MIRLET7D	hsa-let-7d	chr9	+	5p	94178817	NA	flanking-5	5p	NA	NA	-24	GA	G	430.449	291.636	422	3.18587e-08	1.70444e-05	0.274374	0.783797	0.105796	0.179316	0.153705
TCGA-AP-A1DM-01A-21R-A136-13	UCEC	MIRLET7D	hsa-let-7d	chr9	+	5p	94178817	NA	flanking-5	3p	NA	NA	-24	GA	G	306.076	592.385	508	5.95944e-07	0.00031883	-0.224371	0.822469	0.0848807	0.139534	0.163006
TCGA-BS-A0V4-01A-11R-A14C-13	UCEC	MIRLET7D	hsa-let-7d	chr9	+	5p	94178817	NA	flanking-5	3p	NA	NA	-24	GA	G	300.568	592.385	508	0.000454852	0.243346	0.15658	0.875576	0.0577064	0.179387	0.163006
TCGA-AD-A5EJ-01A-11H-A28I-13	COAD	MIRLET7D	hsa-let-7d	chr9	+	5p	94178817	NA	flanking-5	3p	NA	NA	-24	GA	G	768.366	725.92	432	0.00226488	1	0.147777	0.882519	0.054276	0.162636	0.149399
TCGA-AX-A3FT-01A-11R-A22I-13	UCEC	MIRLET7D	hsa-let-7d	chr9	+	5p	94178817	NA	flanking-5	5p	NA	NA	-24	GA	G	395.517	443.664	508	0.00163226	0.873261	0.140519	0.88825	0.0514647	0.135948	0.124733
TCGA-DI-A0WH-01A-12R-A12H-13	UCEC	MIRLET7D	hsa-let-7d	chr9	+	5p	94178817	NA	flanking-5	3p	NA	NA	-24	GA	G	924.325	592.385	508	0.00269668	1	-0.133779	0.893578	0.0488677	0.149011	0.163006
TCGA-AX-A2HG-01A-11R-A17A-13	UCEC	MIRLET7D	hsa-let-7d	chr9	+	5p	94178817	NA	flanking-5	3p	NA	NA	-24	GA	G	319.238	592.385	508	0.00272753	1	-0.133623	0.893701	0.0488078	0.149027	0.163006
TCGA-DI-A0WH-01A-12R-A12H-13	UCEC	MIRLET7D	hsa-let-7d	chr9	+	5p	94178817	NA	flanking-5	5p	NA	NA	-24	GA	G	324.75	443.664	508	0.00660168	1	0.121016	0.903678	0.0439861	0.134392	0.124733
TCGA-AJ-A3BG-01A-11R-A19V-13	UCEC	MIRLET7D	hsa-let-7d	chr9	+	5p	94178817	NA	flanking-5	3p	NA	NA	-24	GAA	G	573.256	592.385	508	0.0340285	1	0.0943034	0.924868	0.0339202	0.172872	0.163006
TCGA-AP-A1DR-01A-11R-A136-13	UCEC	MIRLET7D	hsa-let-7d	chr9	+	5p	94178817	NA	flanking-5	5p	NA	NA	-24	GA	G	370.656	443.664	508	0.0582384	1	-0.0842187	0.932883	0.030173	0.118011	0.124733
TCGA-D1-A0ZS-01A-11R-A119-13	UCEC	MIRLET7D	hsa-let-7d	chr9	+	5p	94178817	NA	flanking-5	5p	NA	NA	-24	G	GA	245.424	443.664	508	0.344267	1	0.0420009	0.966498	0.0147991	0.128085	0.124733
TCGA-IN-8462-01A-11R-2343-13	STAD	MIRLET7E	hsa-let-7e	chr19	+	5p	51692779	NA	flanking-5	5p	NA	NA	-14	C	T	874.558	1129.81	422	1.14094e-81	6.10404e-79	1.17755	0.238978	0.621643	0.206805	0.105286
TCGA-BR-6566-01A-11R-1802-13	STAD	MIRLET7E	hsa-let-7e	chr19	+	5p	51692782	NA	flanking-5	5p	NA	NA	-11	GC	G	1449.24	1129.81	422	4.50313e-24	2.40917e-21	-0.524514	0.599921	0.221906	0.0600665	0.105286
TCGA-A6-5659-01A-01T-1652-13	COAD	MIRLET7E	hsa-let-7e	chr19	+	5p	51692878	NA	flanking-3	5p	NA	NA	19	G	A	725.433	1034.62	432	1.02386e-14	5.47763e-12	-0.385751	0.699681	0.1551	0.0855343	0.119821
TCGA-DX-AB32-01A-11R-A41D-13	SARC	MIRLET7G	hsa-let-7g	chr3	-	5p	52268271	NA	flanking-3	3p	NA	NA	9	C	T	51.7076	55.9057	199	1.77941e-65	9.51984e-63	1.8353	0.0664611	1.17743	0.331038	0.160192
TCGA-AQ-A0Y5-01A-11R-A14L-13	BRCA	MIRLET7G	hsa-let-7g	chr3	-	5p	52268316	COSN23016349	loop	5p	NA	20	NA	G	C	210.65	586.76	1073	9.48098e-287	5.07232e-284	1.54665	0.121948	0.913824	0.231176	0.113754
TCGA-DX-AB32-01A-11R-A41D-13	SARC	MIRLET7G	hsa-let-7g	chr3	-	5p	52268271	NA	flanking-3	5p	NA	NA	9	C	T	616.218	664.576	258	3.61918e-24	1.93626e-21	0.700938	0.483341	0.315746	0.158783	0.114285
TCGA-D1-A174-01A-11R-A12H-13	UCEC	MIRLET7I	hsa-let-7i	chr12	+	5p	62603773	NA	flanking-3	3p	NA	NA	5	C	T	235.742	153.127	520	3.41029e-81	1.82451e-78	-1.00827	0.313323	0.504007	0.0609305	0.162263
TCGA-K4-A5RJ-01A-11R-A28I-13	BLCA	MIRLET7I	hsa-let-7i	chr12	+	5p	62603732	NA	loop	5p	NA	20	NA	CCG	C	1541.74	1022.6	405	1.14209e-44	6.11019e-42	0.791389	0.428717	0.36783	0.171579	0.118936
TCGA-D1-A174-01A-11R-A12H-13	UCEC	MIRLET7I	hsa-let-7i	chr12	+	5p	62603773	NA	flanking-3	5p	NA	NA	5	C	T	1344.7	976.786	523	8.89988e-51	4.76143e-48	-0.733009	0.463553	0.3339	0.0744432	0.13224
TCGA-K4-A5RJ-01A-11R-A28I-13	BLCA	MIRLET7I	hsa-let-7i	chr12	+	5p	62603732	NA	loop	3p	NA	20	NA	CCG	C	41.1089	106.091	394	2.77424e-18	1.48422e-15	0.461775	0.644243	0.19095	0.212918	0.165506
