# Supplementary material for: miRNA gene mutations commonly disrupt the proper functioning of miRNA genes
Source: Research Square preprint supplement (doi:10.21203/rs.3.rs-7029847/v1), 2025-07-21
Supplement: Supplementary file 4 [file 6867cc3ea7c07f6dfa9d5754.xlsx]

## Sheet: Supplementary Table S3
sample_ID	cancer_type	miRNA_gene	miRBase_ID	chromosome	miRNA_gene_orientation	miRNA_strand_balance	mutation_position	mutation_ID_COSMIC	mutation_HGVS	mutation_subregion	analyzed_strand	pos_mut_mature_miRNA	reference_allele	alternative_allele	ref_allele_reads_DNA	alt_allele_reads_DNA	ref_allele_reads_miRNA	alt_allele_reads_miRNA	sum_reads_miRNA	Chi_square_test_p-value	Bonferroni_corrected_Chi_square_test_p-value	Cramer's_V_value
TCGA-AB-2807-03A-01T-0734-13	LAML	MIR142	hsa-mir-142	chr17	-	both	58331264	COSN187665	n.55A>G	seed_3p	3p	4	T	C	693	748	63510	17747	81257	<1E-300	<1,6E-299	0.638
TCGA-FR-A8YC-06A-11R-A37G-13	SKCM	MIR342	hsa-mir-342	chr14	+	3p	100109729	COSN1080961	n.75C>T	non-seed duplex_3p	3p	15	C	T	106	107	256	2682	2938	1.31004e-147	2.09607e-146	0.484
TCGA-D9-A149-06A-11R-A18V-13	SKCM	MIR342	hsa-mir-342	chr14	+	3p	100109729	COSN1080961	n.75C>T	non-seed duplex_3p	3p	15	C	T	12	53	2138	1523	3661	6.14e-154	9.824e-153	0.443
TCGA-46-3769-01A-01T-0981-13	LUSC	MIR196B	hsa-mir-196b	chr7	-	5p	27169539	COSN2378927	n.25C>T	non-seed duplex_5p	5p	11	G	A	57	20	398	84	482	6.20674e-12	9.93079e-11	0.348
TCGA-DQ-5624-01A-01R-1872-13	HNSC	MIR320A	hsa-mir-320a	chr8	-	3p	22244987	COSN2378943	n.51G>A	non-seed duplex_3p	3p	10	C	T	155	31	1433	511	1944	4.69561e-30	7.51297e-29	0.278
TCGA-D1-A16Y-01A-31R-A12H-13	UCEC	MIR1307	hsa-mir-1307	chr10	-	both	103394308	COSN1079925	n.94C>T	non-seed duplex_3p	3p	15	G	A	219	209	5421	97	5518	3.90502e-82	6.24803e-81	0.268
TCGA-FA-A4BB-01A-11R-A31S-13	DLBC	MIR142	hsa-mir-142	chr17	-	both	58331260	COSN4769864	n.59T>C	seed_3p	3p	8	A	G	40	8	43495	6523	50018	<1E-300	<1,6E-299	0.255
TCGA-EE-A2M5-06A-12R-A18V-13	SKCM	MIR127	hsa-mir-127	chr14	+	3p	100883041	COSM3493809	n.63C>T	seed_3p	3p	7	C	T	198	123	2236	208	2444	1.41999e-23	2.27199e-22	0.224
TCGA-55-8089-01A-11H-2240-13	LUAD	MIR320A	hsa-mir-320a	chr8	-	3p	22244987	COSN24411655	n.51G>T	non-seed duplex_3p	3p	10	C	A	480	86	1418	137	1555	1.59847e-13	2.55755e-12	0.217
TCGA-G3-A25S-01A-11R-A16S-13	LIHC	MIR629	hsa-mir-629	chr15	-	5p	70079433	COSN16303140	n.36G>T	non-seed duplex_5p	5p	15	C	A	42	20	321	1204	1525	1.08e-12	1.728e-11	0.213
TCGA-VS-A959-01A-11R-A42V-13	CESC	MIR21	hsa-mir-21	chr17	+	5p	59841322	COSN8603510	n.57G>A	non-seed duplex_3p	3p	12	G	A	53	4	10110	281	10391	8.91173e-77	1.42588e-75	0.19
TCGA-AB-2805-03A-01T-0734-13	LAML	MIR142	hsa-mir-142	chr17	-	both	58331261	COSN4710472	n.58G>C	seed_3p	3p	7	C	G	359	121	70039	12353	82392	<1E-300	<1,6E-299	0.182
TCGA-FF-8041-01A-11R-2212-13	DLBC	MIR142	hsa-mir-142	chr17	-	both	58331260	COSN4769864	n.59T>C	seed_3p	3p	8	A	G	205	66	135767	23343	159110	<1E-300	<1,6E-299	0.181
TCGA-18-5595-01A-01T-1634-13	LUSC	MIR205	hsa-mir-205	chr1	+	5p	209432167	COSN2378349	n.35C>T	seed_5p	5p	2	C	T	162	93	25035	23215	48250	7.36483e-226	1.17837e-224	0.149
TCGA-A5-A0GP-01A-11R-A041-13	UCEC	MIR10B	hsa-mir-10b	chr2	+	5p	176150342	COSN1082679	n.40C>T	non-seed duplex_5p	5p	14	C	T	39	27	234620	221	234841	<1E-300	<1,6E-299	0.141
TCGA-FU-A2QG-01A-11R-A18L-13	CESC	MIR205	hsa-mir-205	chr1	+	5p	209432167	COSN2378349	n.35C>T	seed_5p	5p	2	C	T	258	133	55319	63713	119032	1.02719e-296	1.6435e-295	0.108
