# Supplementary material for: miRNA gene mutations commonly disrupt the proper functioning of miRNA genes
Source: Research Square preprint supplement (doi:10.21203/rs.3.rs-7029847/v1), 2025-07-21
Supplement: Supplementary file 5 [file 758e93d8ba90e044af1630f5.xlsx]

## Sheet: Supplementary Table S2
sample_ID	cancer_type	miRNA_gene	miRBase_ID	chromosome	miRNA_gene_orientation	miRNA_strand_balance	mutation_position	mutation_ID_COSMIC	mutation_HGVS	mutation_subregion	pos_mut_mature_miRNA	reference_allele	alternative_allele	ref_allele_reads_DNA	alt_allele_reads_DNA	ref_allele_reads_miRNA	alt_allele_reads_miRNA	sum_reads_miRNA	mutated_DNA_fraction	mutated_miRNA_fraction	FC_miRNA/gDNA	log2(FC_miRNA/gDNA)	Fisher's_exact_test_p -value	Bonferroni_corrected_Fisher's_exact_test_p-value
TCGA-G3-A25S-01A-11R-A16S-13	LIHC	MIR629	hsa-mir-629	chr15	-	5p	70079433	COSN16303140	n.36G>T	non-seed duplex_5p	15	C	A	42	20	321	1204	1525	0.322581	0.789508	2.44748	1.29129	1.74423e-14	9.24439e-13
TCGA-FR-A8YC-06A-11R-A37G-13	SKCM	MIR342	hsa-mir-342	chr14	+	3p	100109729	COSN1080961	n.75C>T	non-seed duplex_3p	15	C	T	106	107	256	2682	2938	0.502347	0.912866	1.8172	0.861717	6.66134e-16	3.53051e-14
TCGA-D8-A27V-01A-12R-A17A-13	BRCA	MIR30B	hsa-mir-30b	chr8	-	5p	134800551	COSN23017168	n.57G>A	seed_3p	3	C	T	158	113	21	42	63	0.416974	0.666667	1.59882	0.677008	0.0004168	0.0220904
TCGA-DQ-5624-01A-01R-1872-13	HNSC	MIR320A	hsa-mir-320a	chr8	-	3p	22244987	COSN2378943	n.51G>A	non-seed duplex_3p	10	C	T	155	31	1433	511	1944	0.166667	0.26286	1.57716	0.657329	0.00354615	0.187946
TCGA-FU-A2QG-01A-11R-A18L-13	CESC	MIR205	hsa-mir-205	chr1	+	5p	209432167	COSN2378349	n.35C>T	seed_5p	2	C	T	258	133	55319	63713	119032	0.340153	0.535259	1.57358	0.654053	1.22352e-14	6.48466e-13
TCGA-66-2795-01A-02T-0981-13	LUSC	MIR320A	hsa-mir-320a	chr8	-	3p	22244987	COSN2378943	n.51G>A	non-seed duplex_3p	10	C	T	114	124	40	178	218	0.521008	0.816514	1.56718	0.648171	1.90125e-11	1.00766e-09
TCGA-A6-6653-01A-11H-1773-13	COAD	MIR340	hsa-mir-340	chr5	-	5p	180015338	COSN20188985	n.60C>T	seed_3p	3	G	A	235	124	28	26	54	0.345404	0.481481	1.39397	0.479196	0.0678666	1
TCGA-18-5595-01A-01T-1634-13	LUSC	MIR205	hsa-mir-205	chr1	+	5p	209432167	COSN2378349	n.35C>T	seed_5p	2	C	T	162	93	25035	23215	48250	0.364706	0.48114	1.31925	0.399723	0.000200638	0.0106338
TCGA-FA-A4BB-01A-11R-A31S-13	DLBC	MIR142	hsa-mir-142	chr17	-	both	58331260	COSN4769864	n.59T>C	seed_3p	8	A	G	40	8	43495	6523	50018	0.166667	0.130413	0.782478	-0.353877	0.396846	1
TCGA-Q1-A6DW-01A-11R-A32K-13	CESC	MIR301A	hsa-mir-301a	chr17	-	3p	59151171	COSN16132402	n.51C>T	non-seed duplex_3p	1	G	A	81	33	62	18	80	0.289474	0.225	0.777273	-0.363507	0.326755	1
TCGA-46-3769-01A-01T-0981-13	LUSC	MIR196B	hsa-mir-196b	chr7	-	5p	27169539	COSN2378927	n.25C>T	non-seed duplex_5p	11	G	A	57	20	398	84	482	0.25974	0.174274	0.670954	-0.575713	0.0828943	1
TCGA-FF-8041-01A-11R-2212-13	DLBC	MIR142	hsa-mir-142	chr17	-	both	58331260	COSN4769864	n.59T>C	seed_3p	8	A	G	205	66	135767	23343	159110	0.243542	0.14671	0.602399	-0.731208	3.1224e-05	0.00165487
TCGA-AB-2805-03A-01T-0734-13	LAML	MIR142	hsa-mir-142	chr17	-	both	58331261	COSN4710472	n.58G>C	seed_3p	7	C	G	359	121	70039	12353	82392	0.252083	0.14993	0.594762	-0.749615	6.05427e-09	3.20876e-07
TCGA-55-8089-01A-11H-2240-13	LUAD	MIR320A	hsa-mir-320a	chr8	-	3p	22244987	COSN24411655	n.51G>A	non-seed duplex_3p	10	C	A	480	86	1418	137	1555	0.151943	0.0881029	0.57984	-0.786273	4.1113e-05	0.00217899
TCGA-D9-A149-06A-11R-A18V-13	SKCM	MIR342	hsa-mir-342	chr14	+	3p	100109729	COSN1080961	n.75C>T	non-seed duplex_3p	15	C	T	12	53	2138	1523	3661	0.815385	0.416007	0.510197	-0.970874	1.18822e-10	6.29754e-09
TCGA-VS-A959-01A-11R-A42V-13	CESC	MIR21	hsa-mir-21	chr17	+	5p	59841322	COSN8603510	n.57G>A	non-seed duplex_3p	12	G	A	53	4	10110	281	10391	0.0701754	0.0270426	0.385358	-1.37573	0.0695299	1
TCGA-ER-A19S-06A-11R-A18X-13	SKCM	MIR500A	hsa-mir-500a	chrX	+	3p	50008447	COSN1085194	n.17C>T	seed_5p	5	C	T	102	7	63	1	64	0.0642202	0.015625	0.243304	-2.03917	0.260633	1
TCGA-CD-5801-01A-11R-1602-13	STAD	MIR369	hsa-mir-369	chr14	+	3p	101065610	COSN19673117	n.13C>T	seed_5p	5	C	T	505	70	52	1	53	0.121739	0.0188679	0.154987	-2.68979	0.0210725	1
TCGA-22-5473-01A-01T-1634-13	LUSC	MIR361	hsa-mir-361	chrX	-	5p	85903692	COSN2378982	n.16C>T	non-seed duplex_5p	11	G	A	32	3	127	1	128	0.0857143	0.0078125	0.0911458	-3.45568	0.0314059	1
TCGA-EE-A2MR-06A-11R-A18V-13	SKCM	MIR409	hsa-mir-409	chr14	+	both	101065366	COSN23022149	n.67C>T	non-seed duplex_3p	21	C	T	165	14	108	0	108	0.0782123	0	0	<-4	0.00132964	0.0704709
TCGA-ED-A459-01A-11R-A25Z-13	LIHC	MIR200A	hsa-mir-200a	chr1	+	3p	1167893	COSN16303181	n.31T>A	non-seed duplex_5p	16	T	A	549	47	94	0	94	0.0788591	0	0	<-4	0.00143252	0.0759237
TCGA-CG-5734-01A-11R-1602-13	STAD	MIR369	hsa-mir-369	chr14	+	3p	101065611	COSN23023779	n.14G>A	seed_5p	6	G	A	209	8	65	0	65	0.0368664	0	0	<-4	0.204849	1
TCGA-05-4397-01A-01T-1207-13	LUAD	MIR127	hsa-mir-127	chr14	+	3p	100883038	COSM6075319	n.60G>T	seed_3p	4	G	T	139	95	188	0	188	0.405983	0	0	<-4	1.04246e-29	5.52502e-28
TCGA-C4-A0EZ-01A-21R-A24Y-13	BLCA	MIR424	hsa-mir-424	chrX	-	5p	134546697	COSM422225	n.15A>T	seed_5p	5	T	A	75	47	282	0	282	0.385246	0	0	<-4	2.03894e-28	1.08064e-26
TCGA-G3-A5SM-01A-12R-A28Z-13	LIHC	MIR452	hsa-mir-452	chrX	-	5p	151959683	COSN16303043	n.30A>T	non-seed duplex_5p	17	T	A	458	75	516	0	516	0.140713	0	0	<-4	6.01811e-24	3.1896e-22
TCGA-HR-A2OG-06A-21R-A18X-13	SKCM	MIR432	hsa-mir-432	chr14	+	5p	100884501	COSM3493811	n.19G>A	seed_5p	6	G	A	166	145	62	0	62	0.466238	0	0	<-4	1.41837e-15	7.51734e-14
TCGA-EW-A1IX-01A-12R-A143-13	BRCA	MIR142	hsa-mir-142	chr17	-	both	58331303	COSN23015190	n.16C>A	non-seed duplex_5p	1	G	T	61	21	213	0	213	0.256098	0	0	<-4	2.64143e-13	1.39996e-11
TCGA-D3-A8GO-06A-11R-A37G-13	SKCM	MIR335	hsa-mir-335	chr7	+	5p	130496140	COSN23016863	n.30G>A	non-seed duplex_5p	15	G	A	108	16	331	0	331	0.129032	0	0	<-4	4.39995e-10	2.33197e-08
TCGA-DR-A0ZM-01A-12R-A10V-13	CESC	MIR328	hsa-mir-328	chr16	-	3p	67202338	COSN2376590	n.58C>T	non-seed duplex_3p	11	G	A	425	138	77	0	77	0.245115	0	0	<-4	3.144e-09	1.66632e-07
TCGA-A6-6141-01A-11H-1773-13	COAD	MIR136	hsa-mir-136	chr14	+	both	100884768	COSM1368270	n.67G>A	non-seed duplex_3p	19	G	A	197	64	76	0	76	0.245211	0	0	<-4	1.90107e-08	1.00757e-06
TCGA-G3-A25Y-01A-11R-A16S-13	LIHC	MIR425	hsa-mir-425	chr3	-	5p	49020176	COSN16303086	n.59G>A	seed_3p	5	C	T	87	25	53	0	53	0.223214	0	0	<-4	3.34719e-05	0.00177401
TCGA-ER-A193-06A-12R-A18V-13	SKCM	MIR136	hsa-mir-136	chr14	+	both	100884719	COSM3493815	n.18C>T	seed_5p	4	C	T	85	17	70	0	70	0.166667	0	0	<-4	0.000108312	0.00574053
TCGA-EE-A2MR-06A-11R-A18V-13	SKCM	MIR365B	hsa-mir-365b	chr17	+	3p	31575494	COSN5027839	n.84C>T	non-seed duplex_3p	17	C	T	46	5	205	0	205	0.0980392	0	0	<-4	0.000266649	0.0141324
TCGA-DK-A1AC-01A-11R-A13X-13	BLCA	MIR25	hsa-mir-25	chr7	-	3p	100093572	COSN514173	n.72G>A	non-seed duplex_3p	21	C	T	201	48	99227	18	99245	0.192771	0.000181369	0.000940853	-10.0537	6.95609e-112	3.68673e-110
TCGA-A5-A0GP-01A-11R-A041-13	UCEC	MIR10B	hsa-mir-10b	chr2	+	5p	176150342	COSN1082679	n.40C>T	non-seed duplex_5p	14	C	T	39	27	234620	221	234841	0.409091	0.000941062	0.00230037	-8.76392	1.11022e-16	5.88418e-15
TCGA-MI-A75C-01A-11R-A32J-13	LIHC	MIR186	hsa-mir-186	chr1	-	5p	71067697	COSN16303119	n.20A>T	seed_5p	6	T	A	587	370	922	1	923	0.386625	0.00108342	0.00280226	-8.47919	9.11672e-126	4.83186e-124
TCGA-78-7535-01A-11H-2065-13	LUAD	MIR379	hsa-mir-379	chr14	+	5p	101022087	COSN24410139	n.22G>T	non-seed duplex_5p	17	G	T	95	110	1956	3	1959	0.536585	0.00153139	0.00285396	-8.45282	1.18629e-122	6.28734e-121
TCGA-23-2081-01A-01R-1568-13	OV	MIR139	hsa-mir-139	chr11	-	5p	72615081	COSN18246415	n.50G>A	seed_3p	8	C	T	1	4	348	1	349	0.8	0.00286533	0.00358166	-8.12516	3.8773e-08	2.05497e-06
TCGA-05-4390-01A-02T-1754-13	LUAD	MIR500A	hsa-mir-500a	chrX	+	3p	50008488	COSN24409322	n.58C>A	seed_3p	7	C	A	448	266	1118	2	1120	0.372549	0.00178571	0.00479323	-7.70479	2.11801e-121	1.12254e-119
TCGA-AX-A3G9-01A-11R-A22I-13	UCEC	MIR379	hsa-mir-379	chr14	+	5p	101022086	COSN18715117	n.21C>T	non-seed duplex_5p	16	C	T	170	110	2518	6	2524	0.392857	0.00237718	0.006051	-7.36861	2.25428e-111	1.19477e-109
TCGA-XV-A9W5-01A-11R-A38N-13	SKCM	MIR205	hsa-mir-205	chr1	+	5p	209432167	COSN2378349	n.35C>T	seed_5p	2	C	T	315	91	6252	10	6262	0.224138	0.00159693	0.00712478	-7.13294	9.66113e-103	5.1204e-101
TCGA-DK-A1AC-01A-11R-A13X-13	BLCA	MIR523	hsa-mir-523	chr19	+	5p	53698419	COSN513937	n.35C>T	non-seed duplex_5p	20	C	T	354	48	1496	2	1498	0.119403	0.00133511	0.0111816	-6.48273	3.3192e-31	1.75917e-29
TCGA-95-7039-01A-11H-1948-13	LUAD	MIR379	hsa-mir-379	chr14	+	5p	101022087	COSN24410139	n.22G>T	non-seed duplex_5p	17	G	T	87	29	2705	11	2716	0.25	0.00405007	0.0162003	-5.94784	2.38087e-33	1.26186e-31
TCGA-DI-A0WH-01A-12R-A12H-13	UCEC	MIR27A	hsa-mir-27a	chr19	-	3p	13836448	COSN2382145	n.70G>A	non-seed duplex_3p	20	C	T	217	129	2021	13	2034	0.372832	0.00639135	0.0171427	-5.86626	8.16833e-102	4.32922e-100
TCGA-EE-A17X-06A-11R-A18V-13	SKCM	MIR197	hsa-mir-197	chr1	+	3p	109598948	COSN5026096	n.56C>A	non-seed duplex_3p	9	C	A	199	138	1206	14	1220	0.409496	0.0114754	0.0280233	-5.15723	1.33241e-85	7.06176e-84
TCGA-69-7979-01A-11H-2186-13	LUAD	MIR296	hsa-mir-296	chr20	-	both	58817665	COSN24410955	n.30C>T	non-seed duplex_5p	17	G	A	182	117	74	1	75	0.391304	0.0133333	0.0340741	-4.87518	6.12076e-13	3.244e-11
TCGA-D1-A16Y-01A-31R-A12H-13	UCEC	MIR1307	hsa-mir-1307	chr10	-	both	103394308	COSN1079925	n.94C>T	non-seed duplex_3p	15	G	A	219	209	5421	97	5518	0.488318	0.0175788	0.0359988	-4.79591	8.31091e-185	4.40478e-183
TCGA-HT-7476-01A-11R-2026-13	LGG	MIR323A	hsa-mir-323a	chr14	+	3p	101025761	COSN20052415	n.30G>A	non-seed duplex_5p	15	G	A	320	213	53	1	54	0.399625	0.0185185	0.0463398	-4.43161	2.81901e-10	1.49408e-08
TCGA-AA-3710-01A-01T-1021-13	COAD	MIR28	hsa-mir-28	chr3	+	both	188688799	COSN18185224	n.19G>T	seed_5p	6	G	T	304	158	158	3	161	0.341991	0.0186335	0.0544854	-4.19799	2.78591e-20	1.47653e-18
TCGA-29-1762-01A-01R-1567-13	OV	MIR195	hsa-mir-195	chr17	-	5p	7017648	COSN518969	n.54C>G	seed_3p	2	G	C	4	20	145	18	163	0.833333	0.110429	0.132515	-2.91577	5.87997e-13	3.11638e-11
TCGA-A6-6653-01A-11H-1773-13	COAD	MIR20A	hsa-mir-20a	chr13	+	5p	91351125	COSN23012485	n.61_62insA	non-seed duplex_3p	18	T	TA	121	66	60	4	64	0.352941	0.0625	0.177083	-2.4975	1.73808e-06	9.21184e-05
TCGA-EE-A2M5-06A-12R-A18V-13	SKCM	MIR127	hsa-mir-127	chr14	+	3p	100883041	COSM3493809	n.63C>T	seed_3p	7	C	T	198	123	2236	208	2444	0.383178	0.0851064	0.222107	-2.17067	4.44089e-15	2.35367e-13
TCGA-AB-2807-03A-01T-0734-13	LAML	MIR142	hsa-mir-142	chr17	-	both	58331264	COSN187665	n.55A>G	seed_3p	4	T	C	693	748	63510	17747	81257	0.519084	0.218406	0.420752	-1.24896	2.50623e-134	1.3283e-132
