# Supplementary material for: miRNA gene mutations commonly disrupt the proper functioning of miRNA genes
Source: Research Square preprint supplement (doi:10.21203/rs.3.rs-7029847/v1), 2025-07-21
Supplement: Supplementary file 6 [file 8ecb88fa990f9bca45f2597e.xlsx]

## Sheet: n.5-7delAGC_MIR122_DE_genes
gene_ID	log2(FC)	adj_p-value	-log10(adj_p-value)	change_direction	predicted_target_mir-122-5p
A1BG	-8.648	2.55569e-06	5.59249	Down	NO
ABCG5	-6.498	0.000409321	3.38794	Down	NO
ABCG8	-10.487	8.32418e-05	4.07966	Down	YES
ACAD10	-2.377	0.00567657	2.24591	Down	NO
ACOT4	-2.519	0.0228197	1.64169	Down	NO
ACSM2A	-7.409	0.000262756	3.58045	Down	YES
ACSM2B	-6.278	0.00198605	2.70201	Down	YES
ADAMTSL4	-3.542	0.015929	1.79781	Down	NO
ADH1B	-5.987	0.00849862	2.07065	Down	NO
ADH4	-6.991	0.00610521	2.2143	Down	NO
ADHFE1	-4.2	0.0101089	1.9953	Down	NO
AGFG2	-1.391	0.0486975	1.31249	Down	NO
AGXT	-7.377	0.000132138	3.87897	Down	YES
AHSG	-9.301	7.06537e-07	6.15086	Down	NO
ALDH4A1	-2.712	0.0221943	1.65376	Down	NO
ALDOC	-5.594	0.00370424	2.4313	Down	NO
APOA1	-7.59	0.000262756	3.58045	Down	NO
APOA2	-11.318	4.93346e-11	10.3068	Down	NO
APOA5	-9.88	2.55569e-06	5.59249	Down	NO
APOC3	-9.047	7.06537e-07	6.15086	Down	YES
APOC4	-8.101	0.000361403	3.44201	Down	NO
APOF	-6.921	0.00530888	2.275	Down	NO
APOH	-4.543	0.00866477	2.06224	Down	NO
AQP9	-6.871	0.0041085	2.38632	Down	NO
ASAP3	-3.106	0.0147741	1.8305	Down	NO
ASPDH	-3.571	0.0438126	1.3584	Down	NO
BDH1	-5.615	0.000431378	3.36514	Down	YES
BHMT	-5.619	0.0150539	1.82235	Down	NO
BZRAP1	-3.562	0.026705	1.57341	Down	NO
C10orf47	-1.626	0.0426369	1.37021	Down	NO
C1orf128	-1.958	0.00481411	2.31748	Down	NO
C5	-3.014	0.0177707	1.75029	Down	NO
C8A	-3.993	0.0223306	1.6511	Down	NO
C8orf80	-3.326	0.0481892	1.31705	Down	NO
C9orf103	-1.973	0.0443788	1.35282	Down	NO
CA5A	-5.691	0.0133161	1.87562	Down	NO
CBS	-4.716	0.00430943	2.36558	Down	NO
CCDC106	-2.573	0.019864	1.70193	Down	NO
CCL16	-8.125	0.000585689	3.23233	Down	NO
CD302	-3.458	0.00473782	2.32442	Down	YES
CDO1	-8.527	7.59881e-07	6.11925	Down	NO
CEBPA	-2.667	0.0285983	1.54366	Down	NO
CENPV	-2.765	0.0276563	1.55821	Down	NO
CFHR2	-3.414	0.0335065	1.47487	Down	NO
CFHR5	-4.995	0.0230205	1.63789	Down	NO
CFL2	-1.781	0.0307811	1.51172	Down	NO
CGREF1	-3.59	0.0320483	1.4942	Down	NO
CHN2	-4.123	0.00311923	2.50595	Down	NO
CNPY2	-1.452	0.0224202	1.64936	Down	NO
COQ10A	-3.556	0.00621786	2.20636	Down	NO
CPN2	-8.405	3.26659e-07	6.48591	Down	NO
CPS1	-7.312	0.00289312	2.53863	Down	YES
CYP1A1	-4.351	0.027836	1.55539	Down	NO
CYP27A1	-4.503	0.00513298	2.28963	Down	NO
CYP2A6	-5.591	0.0210774	1.67618	Down	NO
CYP2C9	-6.302	0.00580273	2.23637	Down	NO
CYP2D6	-7.198	0.000861195	3.0649	Down	NO
CYP2D7P1	-4.146	0.0307811	1.51172	Down	NO
CYP2E1	-8.725	0.00196381	2.7069	Down	NO
CYP3A4	-3.423	0.0486975	1.31249	Down	NO
CYP4F22	-3.874	0.0443788	1.35282	Down	NO
CYP7A1	-7.653	0.00610521	2.2143	Down	NO
CYP8B1	-7.725	0.00367863	2.43431	Down	NO
DNASE1L3	-6.237	0.00791732	2.10142	Down	NO
DNHD1	-2.279	0.0376601	1.42412	Down	NO
DPYS	-4.135	0.0227383	1.64324	Down	NO
ENOSF1	-2.012	0.0113209	1.94612	Down	YES
EPB41L4B	-2.431	0.0397289	1.40089	Down	NO
ERO1LB	-2.635	0.0307811	1.51172	Down	YES
ETNK2	-6.066	0.00218822	2.65991	Down	YES
F2	-8.974	7.4574e-11	10.1274	Down	NO
F9	-3.803	0.0404886	1.39267	Down	YES
FAM176A	-6.951	8.04639e-06	5.0944	Down	NO
FBLN7	-4.909	0.00289312	2.53863	Down	YES
FETUB	-8.651	0.000790638	3.10202	Down	NO
FGF21	-8.161	0.00484243	2.31494	Down	NO
FTCD	-8.289	1.48808e-05	4.82737	Down	NO
GABRE	-5.682	0.00988089	2.0052	Down	NO
GBA2	-0.924	0.0398961	1.39907	Down	NO
GC	-2.284	0.0401951	1.39583	Down	NO
GLTPD2	-5.83	0.00610521	2.2143	Down	NO
GLYAT	-5.531	0.0200468	1.69795	Down	NO
GNMT	-8.309	0.00181201	2.74184	Down	NO
GPC3	-4.081	0.0376601	1.42412	Down	NO
GYS2	-5.307	0.0200468	1.69795	Down	NO
H1FX	-1.413	0.0385602	1.41386	Down	NO
HFE2	-9.608	8.51831e-07	6.06965	Down	NO
HGFAC	-4.879	0.0285983	1.54366	Down	NO
HP	-7.63	0.000648706	3.18795	Down	NO
HPD	-8.085	0.00196381	2.7069	Down	NO
HPR	-8.964	1.62716e-05	4.78857	Down	NO
HPX	-7.592	2.56567e-05	4.5908	Down	NO
HYAL1	-2.85	0.01829	1.73779	Down	YES
IFFO1	-2.343	0.00367863	2.43431	Down	NO
KLF15	-3.932	0.0064867	2.18798	Down	NO
KNG1	-6.242	0.000485495	3.31382	Down	NO
LCAT	-3.389	0.0382226	1.41768	Down	NO
LECT2	-7.79	0.00303354	2.51805	Down	NO
LHPP	-4.223	0.00325162	2.4879	Down	NO
LIME1	-4.199	0.0141063	1.85059	Down	NO
LOC55908	-10.733	0.000148143	3.82932	Down	NO
LPA	-4.905	0.0245787	1.60944	Down	NO
MACROD1	-5.909	0.000485495	3.31382	Down	NO
MAP4K2	-1.244	0.0455236	1.34176	Down	NO
MASP2	-8.168	3.98321e-05	4.39977	Down	NO
MLXIPL	-4.789	0.000701243	3.15413	Down	NO
MST1	-8.002	8.56732e-09	8.06716	Down	NO
MST1P2	-5.391	0.001938	2.71265	Down	NO
NAGS	-6.062	0.00334969	2.475	Down	NO
NCRNA00105	-2.829	0.0374486	1.42656	Down	NO
NEIL1	-2.935	0.0146931	1.83289	Down	NO
NKIRAS1	-3.728	0.000246747	3.60775	Down	NO
NMNAT3	-3.933	0.0101344	1.9942	Down	NO
NOTUM	-4.25	0.0376601	1.42412	Down	NO
NR1I3	-5.07	0.0147741	1.8305	Down	NO
NRTN	-3.663	0.019864	1.70193	Down	NO
OGDHL	-6.69	0.00196381	2.7069	Down	NO
OSTalpha	-3.982	0.0355143	1.4496	Down	NO
OTC	-8.573	0.000246747	3.60775	Down	NO
PAOX	-1.552	0.0470588	1.32736	Down	YES
PCK2	-3.136	0.0269691	1.56913	Down	NO
PEBP1	-3.745	0.000808357	3.0924	Down	NO
PFKFB1	-7.887	0.00487658	2.31188	Down	NO
PLG	-8.847	2.09509e-07	6.6788	Down	NO
PPP1R3G	-4.957	0.0250846	1.60059	Down	YES
PQLC1	-1.639	0.0401951	1.39583	Down	NO
PROC	-5.439	0.00025316	3.59661	Down	NO
PROZ	-4.251	0.0266811	1.5738	Down	NO
RBP4	-4.248	0.00922607	2.03498	Down	NO
RBP5	-5.986	0.00196381	2.7069	Down	YES
RILP	-2.705	0.0210774	1.67618	Down	NO
RTP3	-6.634	0.0085146	2.06984	Down	NO
SAA1	-3.898	0.0443788	1.35282	Down	YES
SAA4	-7.646	0.000616491	3.21007	Down	NO
SARDH	-4.357	0.00477899	2.32066	Down	NO
SDC2	-2.662	0.00922607	2.03498	Down	NO
SDR39U1	-2.396	0.000648706	3.18795	Down	NO
SEC31B	-4.615	0.00794891	2.09969	Down	NO
SERPINA11	-8.67	8.32418e-05	4.07966	Down	NO
SERPINA7	-7.718	0.00117192	2.9311	Down	NO
SERPINC1	-9.246	6.12115e-07	6.21317	Down	NO
SERPIND1	-6.614	1.62716e-05	4.78857	Down	NO
SFXN5	-1.992	0.0248347	1.60494	Down	NO
SLC10A1	-6.547	0.00922775	2.0349	Down	NO
SLC13A5	-9.027	3.45428e-05	4.46164	Down	YES
SLC1A2	-3.857	0.0426369	1.37021	Down	NO
SLC22A25	-3.211	0.0458928	1.33826	Down	NO
SLC22A3	-7.4	4.59731e-06	5.3375	Down	NO
SLC22A7	-7.687	0.00138348	2.85903	Down	YES
SLC25A42	-2.966	0.0198294	1.70269	Down	NO
SLC27A2	-5.394	0.00367863	2.43431	Down	NO
SLC27A5	-5.781	0.00705554	2.15147	Down	YES
SLC2A2	-3.58	0.026705	1.57341	Down	YES
SLC38A3	-5.084	0.00334969	2.475	Down	NO
SULT2A1	-3.429	0.0422667	1.374	Down	NO
SYT7	-3.828	0.0393414	1.40515	Down	NO
TCEA3	-2.871	0.0101089	1.9953	Down	NO
TF	-9.024	1.68103e-09	8.77442	Down	NO
TM7SF2	-2.658	0.0404886	1.39267	Down	NO
TMBIM4	-2.235	0.00102173	2.99066	Down	YES
TMEM120A	-1.383	0.0441554	1.35502	Down	NO
TMEM176A	-6.551	7.06537e-07	6.15086	Down	NO
TMEM176B	-5.885	3.58898e-06	5.44503	Down	NO
TRIB3	-3.402	0.0150539	1.82235	Down	NO
UROC1	-4.103	0.0408647	1.38865	Down	NO
VNN3	-4.605	0.0240935	1.6181	Down	NO
WDR45	-1.347	0.0219251	1.65906	Down	NO
ZBTB16	-4.499	0.0307811	1.51172	Down	YES
ZNF544	-3.038	0.00196381	2.7069	Down	NO
ZNF606	-1.916	0.038823	1.41091	Down	NO
A1CF	-0.084	0.791588	0.101501	Not significant	YES
A2LD1	-0.251	0.398532	0.399537	Not significant	NO
A2M	-0.261	0.416129	0.380772	Not significant	NO
A4GALT	-0.056	0.865506	0.0627297	Not significant	NO
AAAS	-0.16	0.695902	0.157452	Not significant	NO
AACS	0.065	0.863864	0.0635548	Not significant	YES
AADAC	-0.095	0.720084	0.142617	Not significant	NO
AADAT	-0.061	0.828808	0.0815458	Not significant	NO
AAGAB	0.082	0.894897	0.0482269	Not significant	NO
AAK1	-0.017	0.976618	0.0102754	Not significant	NO
AAMP	-0.022	0.975077	0.010961	Not significant	NO
AARS	-0.022	0.971019	0.0127725	Not significant	NO
AARS2	-0.046	0.937073	0.0282264	Not significant	YES
AARSD1	0.085	0.816341	0.0881286	Not significant	NO
AASDH	-0.018	0.977756	0.00976939	Not significant	NO
AASDHPPT	-0.004	0.996333	0.00159537	Not significant	NO
AASS	-1.91	0.097935	1.00906	Not significant	YES
AATF	0.159	0.653533	0.184732	Not significant	NO
AATK	-0.05	0.86892	0.0610204	Not significant	YES
ABAT	-0.468	0.269929	0.568751	Not significant	YES
ABCA1	0.039	0.927835	0.0325293	Not significant	NO
ABCA11P	0.053	0.902592	0.0445083	Not significant	NO
ABCA2	-0.01	0.983195	0.00736054	Not significant	NO
ABCA3	0.07	0.795223	0.099511	Not significant	NO
ABCA4	0.025	0.941996	0.0259511	Not significant	NO
ABCA5	-0.16	0.563322	0.249244	Not significant	NO
ABCA6	-1.611	0.103842	0.983626	Not significant	NO
ABCA7	-0.133	0.612731	0.21273	Not significant	NO
ABCA8	-0.082	0.758419	0.120091	Not significant	NO
ABCA9	-0.554	0.261532	0.582475	Not significant	NO
ABCB1	0.027	0.936343	0.0285649	Not significant	NO
ABCB10	-0.034	0.953713	0.0205824	Not significant	NO
ABCB11	-2.723	0.0776906	1.10963	Not significant	YES
ABCB4	-0.584	0.255753	0.59218	Not significant	NO
ABCB6	-0.038	0.924427	0.0341272	Not significant	NO
ABCB7	0.066	0.902592	0.0445083	Not significant	NO
ABCB8	-0.142	0.659546	0.180755	Not significant	NO
ABCB9	0.115	0.67302	0.171972	Not significant	NO
ABCC1	0.145	0.588115	0.230538	Not significant	NO
ABCC10	0.042	0.931957	0.0306041	Not significant	NO
ABCC11	-0.799	0.215681	0.666188	Not significant	YES
ABCC2	0.022	0.95678	0.0191881	Not significant	NO
ABCC3	0.126	0.64338	0.191532	Not significant	NO
ABCC4	0.058	0.839514	0.0759721	Not significant	NO
ABCC5	0.058	0.90827	0.0417849	Not significant	NO
ABCC6	-0.069	0.836136	0.0777229	Not significant	NO
ABCC6P1	-0.162	0.54492	0.263667	Not significant	NO
ABCC6P2	-0.514	0.210413	0.676927	Not significant	NO
ABCC9	-0.447	0.296276	0.528304	Not significant	NO
ABCD1	-0.073	0.838802	0.0763404	Not significant	NO
ABCD2	-0.049	0.873809	0.0585837	Not significant	YES
ABCD3	-0.132	0.694584	0.158275	Not significant	NO
ABCD4	-0.338	0.26526	0.576328	Not significant	YES
ABCE1	0.133	0.725108	0.139597	Not significant	NO
ABCF1	0.022	0.97374	0.0115568	Not significant	YES
ABCF2	0.239	0.431892	0.364625	Not significant	NO
ABCF3	-0.135	0.768338	0.114448	Not significant	YES
ABCG1	-0.029	0.935087	0.029148	Not significant	YES
ABCG2	-0.101	0.702786	0.153177	Not significant	YES
ABHD1	-0.917	0.216216	0.665111	Not significant	NO
ABHD10	-0.407	0.193621	0.713048	Not significant	NO
ABHD11	0.029	0.950376	0.0221043	Not significant	YES
ABHD12	-0.198	0.493228	0.306952	Not significant	NO
ABHD13	-0.111	0.77382	0.11136	Not significant	NO
ABHD14A	-0.242	0.398669	0.399388	Not significant	NO
ABHD14B	-0.114	0.705851	0.151287	Not significant	NO
ABHD15	-0.111	0.686463	0.163383	Not significant	YES
ABHD2	-0.048	0.902592	0.0445083	Not significant	NO
ABHD3	0.027	0.958699	0.0183176	Not significant	NO
ABHD4	0.017	0.973938	0.0114687	Not significant	YES
ABHD5	-0.001	0.998955	0.000453973	Not significant	YES
ABHD6	-0.245	0.398669	0.399388	Not significant	NO
ABHD8	-0.133	0.67515	0.1706	Not significant	NO
ABI1	-0.018	0.978155	0.00959237	Not significant	NO
ABI2	0.061	0.894897	0.0482269	Not significant	YES
ABI3	-0.01	0.983387	0.00727536	Not significant	NO
ABI3BP	-0.027	0.934564	0.0293908	Not significant	NO
ABL1	0.08	0.859945	0.0655295	Not significant	NO
ABL2	0.318	0.282104	0.54959	Not significant	YES
ABLIM1	0.05	0.909347	0.0412703	Not significant	YES
ABLIM2	-0.072	0.791648	0.101468	Not significant	NO
ABLIM3	-0.166	0.53607	0.270779	Not significant	NO
ABP1	-0.892	0.220944	0.655717	Not significant	NO
ABR	-0.009	0.983277	0.00732401	Not significant	YES
ABT1	-0.054	0.922241	0.0351558	Not significant	NO
ABTB1	-0.317	0.288562	0.539761	Not significant	NO
ABTB2	-0.64	0.164555	0.783688	Not significant	YES
ACAA1	-0.226	0.422202	0.374479	Not significant	NO
ACAA2	-0.081	0.78052	0.107616	Not significant	NO
ACACA	0.043	0.923448	0.0345874	Not significant	YES
ACACB	-0.285	0.352301	0.453086	Not significant	NO
ACAD11	-0.329	0.312947	0.504529	Not significant	NO
ACAD8	-0.095	0.815712	0.0884631	Not significant	NO
ACAD9	-0.332	0.263201	0.579713	Not significant	NO
ACADL	-0.113	0.681994	0.166219	Not significant	NO
ACADM	-0.05	0.89708	0.0471687	Not significant	NO
ACADS	-0.3	0.328265	0.483775	Not significant	YES
ACADSB	-0.311	0.33393	0.476345	Not significant	NO
ACADVL	-0.325	0.293101	0.532983	Not significant	NO
ACAN	0.075	0.782202	0.106681	Not significant	NO
ACAP1	-1.133	0.160323	0.795003	Not significant	NO
ACAP2	-0.035	0.955928	0.0195748	Not significant	NO
ACAP3	0.002	0.998568	0.000622341	Not significant	NO
ACAT1	-0.345	0.290794	0.536415	Not significant	NO
ACAT2	-0.201	0.467581	0.330144	Not significant	NO
ACBD3	0.089	0.84292	0.0742138	Not significant	NO
ACBD4	-0.12	0.663058	0.178448	Not significant	YES
ACBD5	-0.015	0.978155	0.00959237	Not significant	NO
ACBD6	0.064	0.897278	0.0470731	Not significant	NO
ACBD7	-0.077	0.772453	0.112128	Not significant	YES
ACCN2	-0.037	0.90827	0.0417849	Not significant	NO
ACCN3	0.001	0.998822	0.000511903	Not significant	NO
ACCS	-0.256	0.379247	0.421078	Not significant	NO
ACD	0.058	0.903532	0.0440567	Not significant	YES
ACE	-0.018	0.966216	0.0149257	Not significant	NO
ACER2	0.025	0.949939	0.0223044	Not significant	YES
ACER3	0.021	0.970523	0.0129941	Not significant	NO
ACHE	-0.04	0.898661	0.0464042	Not significant	NO
ACIN1	0.028	0.970523	0.0129941	Not significant	NO
ACLY	0.115	0.745878	0.127332	Not significant	NO
ACMSD	-0.08	0.765944	0.115803	Not significant	NO
ACN9	-0.225	0.421853	0.374839	Not significant	NO
ACO1	-0.147	0.599498	0.222212	Not significant	NO
ACO2	-0.03	0.956675	0.0192357	Not significant	NO
ACOT1	-0.291	0.339067	0.469715	Not significant	NO
ACOT11	0.046	0.884299	0.0534008	Not significant	NO
ACOT12	-0.017	0.964654	0.0156286	Not significant	NO
ACOT13	-0.127	0.674662	0.170914	Not significant	YES
ACOT2	-0.157	0.56443	0.24839	Not significant	NO
ACOT6	-0.626	0.265375	0.57614	Not significant	NO
ACOT7	-0.167	0.563373	0.249204	Not significant	NO
ACOT8	-0.134	0.671601	0.172888	Not significant	NO
ACOT9	-0.029	0.963994	0.0159257	Not significant	NO
ACOX1	-0.058	0.886706	0.0522201	Not significant	NO
ACOX2	-1.394	0.0989466	1.0046	Not significant	NO
ACOX3	-0.07	0.879387	0.0558198	Not significant	YES
ACP1	-0.02	0.977756	0.00976939	Not significant	YES
ACP2	-0.19	0.52921	0.276372	Not significant	NO
ACP5	-0.028	0.935087	0.029148	Not significant	NO
ACP6	-0.03	0.955928	0.0195748	Not significant	YES
ACPL2	-0.073	0.812356	0.0902536	Not significant	NO
ACR	0.038	0.905364	0.0431768	Not significant	YES
ACRBP	-0.046	0.89291	0.0491924	Not significant	NO
ACRC	0.018	0.970523	0.0129941	Not significant	NO
ACSBG1	-0.312	0.440462	0.356091	Not significant	YES
ACSF2	-0.819	0.140712	0.851669	Not significant	NO
ACSF3	-0.015	0.975971	0.0105629	Not significant	NO
ACSL1	-0.41	0.290794	0.536415	Not significant	NO
ACSL3	-0.056	0.902592	0.0445083	Not significant	NO
ACSL4	-0.109	0.6841	0.16488	Not significant	NO
ACSL5	-0.13	0.617001	0.209714	Not significant	NO
ACSL6	-0.294	0.425062	0.371548	Not significant	NO
ACSM1	-0.291	0.43845	0.35808	Not significant	NO
ACSM3	-0.027	0.935951	0.028747	Not significant	NO
ACSM5	-2.724	0.0666096	1.17646	Not significant	NO
ACSS1	-0.047	0.887387	0.0518869	Not significant	YES
ACSS2	-0.183	0.497601	0.303119	Not significant	NO
ACSS3	-0.078	0.767436	0.114958	Not significant	NO
ACTA2	0.039	0.917908	0.0372007	Not significant	NO
ACTB	-0.009	0.990013	0.00435898	Not significant	NO
ACTG1	0.103	0.786423	0.104344	Not significant	NO
ACTG2	0.001	0.998822	0.000511903	Not significant	NO
ACTL6A	0.01	0.989903	0.00440721	Not significant	NO
ACTN1	-0.016	0.977756	0.00976939	Not significant	YES
ACTN4	0.063	0.911893	0.0400563	Not significant	NO
ACTR10	-0.245	0.431892	0.364625	Not significant	NO
ACTR1A	-0.061	0.918106	0.037107	Not significant	YES
ACTR1B	-0.25	0.425062	0.371548	Not significant	YES
ACTR2	0.146	0.705851	0.151287	Not significant	NO
ACTR3	0.113	0.80604	0.0936433	Not significant	YES
ACTR3B	-0.178	0.545242	0.26341	Not significant	NO
ACTR3C	0.017	0.971019	0.0127725	Not significant	NO
ACTR5	-0.033	0.954748	0.0201111	Not significant	NO
ACTR6	-0.048	0.935951	0.028747	Not significant	NO
ACTR8	0.076	0.902262	0.0446675	Not significant	YES
ACVR1	0.062	0.898575	0.0464457	Not significant	YES
ACVR1B	-0.057	0.902592	0.0445083	Not significant	NO
ACVR1C	-0.114	0.664127	0.177749	Not significant	NO
ACVR2A	0.075	0.893801	0.048759	Not significant	NO
ACVR2B	-0.035	0.936343	0.0285649	Not significant	YES
ACVRL1	0.034	0.946469	0.0238938	Not significant	NO
ACY1	-0.07	0.836136	0.0777229	Not significant	NO
ACY3	-0.27	0.398669	0.399388	Not significant	NO
ACYP1	-0.08	0.811138	0.0909055	Not significant	NO
ACYP2	-0.089	0.780418	0.107673	Not significant	NO
ADA	0.116	0.689836	0.161254	Not significant	NO
ADAL	0.007	0.990013	0.00435898	Not significant	NO
ADAM10	0.047	0.90827	0.0417849	Not significant	YES
ADAM15	0.105	0.736866	0.132612	Not significant	NO
ADAM17	0.128	0.650395	0.186823	Not significant	NO
ADAM19	0.111	0.707913	0.15002	Not significant	NO
ADAM28	0.03	0.922241	0.0351558	Not significant	NO
ADAM6	-0.108	0.700737	0.154445	Not significant	NO
ADAM8	-0.082	0.770832	0.113041	Not significant	NO
ADAM9	0.089	0.751601	0.124013	Not significant	NO
ADAMTS1	0.069	0.809176	0.091957	Not significant	NO
ADAMTS10	0.027	0.943476	0.0252691	Not significant	YES
ADAMTS13	-0.08	0.785657	0.104767	Not significant	YES
ADAMTS17	-0.075	0.778394	0.1088	Not significant	NO
ADAMTS2	0.022	0.950569	0.0220165	Not significant	NO
ADAMTS3	0.05	0.87078	0.0600914	Not significant	NO
ADAMTS4	0.046	0.902469	0.0445677	Not significant	YES
ADAMTS5	0.108	0.689836	0.161254	Not significant	YES
ADAMTS6	0.034	0.918167	0.0370783	Not significant	NO
ADAMTS7	0.022	0.96461	0.0156482	Not significant	NO
ADAMTS8	-0.038	0.908319	0.0417617	Not significant	YES
ADAMTS9	0.034	0.925034	0.0338424	Not significant	NO
ADAMTSL1	-0.044	0.894437	0.0484503	Not significant	YES
ADAMTSL2	-0.011	0.973938	0.0114687	Not significant	NO
ADAMTSL3	-0.025	0.943476	0.0252691	Not significant	NO
ADAMTSL5	-0.026	0.942323	0.0258	Not significant	NO
ADAP1	-0.109	0.688091	0.162354	Not significant	NO
ADAP2	0.051	0.898575	0.0464457	Not significant	NO
ADAR	0.087	0.859663	0.0656716	Not significant	YES
ADARB1	-0.042	0.930004	0.0315153	Not significant	YES
ADAT1	0.093	0.752788	0.123327	Not significant	YES
ADAT2	0.008	0.989903	0.00440721	Not significant	YES
ADAT3	-0.031	0.942323	0.0258	Not significant	NO
ADC	-0.026	0.95417	0.0203742	Not significant	NO
ADCK1	-0.138	0.683594	0.165202	Not significant	NO
ADCK2	-0.137	0.689836	0.161254	Not significant	NO
ADCK4	0.061	0.902592	0.0445083	Not significant	NO
ADCK5	-0.27	0.35447	0.45042	Not significant	YES
ADCY1	-0.252	0.476013	0.322381	Not significant	YES
ADCY10	0.024	0.947606	0.0233723	Not significant	NO
ADCY3	-0.007	0.989903	0.00440721	Not significant	YES
ADCY4	-0.099	0.726712	0.138638	Not significant	NO
ADCY5	0.022	0.950735	0.0219407	Not significant	NO
ADCY6	0.052	0.920825	0.0358228	Not significant	NO
ADCY7	-0.071	0.825288	0.0833944	Not significant	NO
ADCY9	-0.081	0.835061	0.0782817	Not significant	NO
ADD1	-0.072	0.902592	0.0445083	Not significant	NO
ADD3	0.052	0.889286	0.0509586	Not significant	NO
ADH1A	-0.047	0.885809	0.0526599	Not significant	NO
ADH1C	-0.005	0.990013	0.00435898	Not significant	NO
ADH5	-0.025	0.967025	0.0145624	Not significant	NO
ADH6	-0.106	0.687351	0.162821	Not significant	YES
ADI1	-0.218	0.435751	0.360762	Not significant	NO
ADIPOR1	-0.079	0.886141	0.0524973	Not significant	NO
ADIPOR2	-0.1	0.773633	0.111465	Not significant	YES
ADK	-0.492	0.201155	0.696469	Not significant	NO
ADM	-0.333	0.325705	0.487176	Not significant	NO
ADM2	-0.086	0.742488	0.12931	Not significant	YES
ADNP	0.106	0.765944	0.115803	Not significant	NO
ADNP2	0.054	0.918167	0.0370783	Not significant	NO
ADO	0.192	0.589548	0.229481	Not significant	YES
ADORA1	0.024	0.943051	0.0254647	Not significant	YES
ADORA2A	-0.089	0.80663	0.0933258	Not significant	NO
ADORA2B	-0.03	0.924427	0.0341272	Not significant	NO
ADORA3	0.043	0.899594	0.0459537	Not significant	NO
ADPGK	-0.057	0.923234	0.0346881	Not significant	NO
ADPRH	0.092	0.791696	0.101442	Not significant	NO
ADPRHL1	0.016	0.966998	0.0145743	Not significant	NO
ADPRHL2	0	0.99947	0.000230343	Not significant	NO
ADRA1A	-0.223	0.499282	0.301654	Not significant	YES
ADRA1B	-0.094	0.720084	0.142617	Not significant	NO
ADRA2B	-0.308	0.348245	0.458115	Not significant	NO
ADRA2C	0.006	0.988357	0.00508607	Not significant	NO
ADRB1	-0.048	0.879753	0.0556393	Not significant	NO
ADRB2	-0.193	0.497283	0.303396	Not significant	NO
ADRBK1	-0.185	0.59988	0.221935	Not significant	NO
ADRBK2	0.023	0.950376	0.0221043	Not significant	YES
ADRM1	-0.122	0.74513	0.127768	Not significant	NO
ADSL	0.117	0.756062	0.121442	Not significant	YES
ADSS	0.128	0.726938	0.138502	Not significant	YES
ADSSL1	-0.1	0.707504	0.150271	Not significant	NO
AEBP2	0.081	0.869646	0.0606576	Not significant	NO
AEN	-0.024	0.964774	0.0155745	Not significant	NO
AES	-0.077	0.851337	0.0698983	Not significant	NO
AFAP1	0.016	0.969943	0.0132538	Not significant	NO
AFAP1L1	-0.061	0.890572	0.0503308	Not significant	NO
AFARP1	-0.079	0.765944	0.115803	Not significant	NO
AFF1	0.102	0.765944	0.115803	Not significant	NO
AFF3	0.021	0.955928	0.0195748	Not significant	YES
AFF4	0.069	0.891694	0.0497844	Not significant	NO
AFG3L1	0.008	0.990013	0.00435898	Not significant	NO
AFG3L2	-0.174	0.598793	0.222723	Not significant	NO
AFM	-0.007	0.987578	0.00542853	Not significant	NO
AFMID	-0.058	0.897292	0.0470664	Not significant	YES
AFP	-0.099	0.740329	0.130575	Not significant	NO
AFTPH	0.077	0.89291	0.0491924	Not significant	NO
AG2	-0.03	0.925691	0.0335338	Not significant	NO
AGA	-0.063	0.87187	0.0595482	Not significant	NO
AGAP1	0.174	0.552306	0.257821	Not significant	YES
AGAP11	-0.044	0.890651	0.0502926	Not significant	NO
AGAP2	-0.213	0.440462	0.356091	Not significant	YES
AGAP3	-0.098	0.810025	0.0915014	Not significant	NO
AGAP4	-0.117	0.720084	0.142617	Not significant	NO
AGAP5	-0.092	0.770832	0.113041	Not significant	NO
AGAP6	-0.091	0.780535	0.107608	Not significant	NO
AGAP7	-0.077	0.791648	0.101468	Not significant	NO
AGAP8	0.035	0.927592	0.032643	Not significant	NO
AGBL2	-0.124	0.64014	0.193725	Not significant	NO
AGBL3	-0.108	0.691498	0.160209	Not significant	NO
AGBL5	-0.124	0.712372	0.147293	Not significant	NO
AGER	-0.095	0.736866	0.132612	Not significant	NO
AGFG1	0.101	0.827327	0.0823229	Not significant	NO
AGGF1	0.234	0.478475	0.32014	Not significant	NO
AGK	0.074	0.886137	0.0524991	Not significant	NO
AGL	-0.08	0.796843	0.0986274	Not significant	NO
AGMAT	-0.096	0.736866	0.132612	Not significant	YES
AGPAT1	0.104	0.794885	0.0996957	Not significant	NO
AGPAT2	-0.114	0.671601	0.172888	Not significant	YES
AGPAT3	-0.063	0.902592	0.0445083	Not significant	NO
AGPAT4	-0.059	0.838802	0.0763404	Not significant	YES
AGPAT5	-0.057	0.879753	0.0556393	Not significant	YES
AGPAT6	-0.038	0.934629	0.0293608	Not significant	YES
AGPAT9	-0.089	0.733706	0.134478	Not significant	NO
AGPHD1	-0.142	0.618864	0.208405	Not significant	NO
AGPS	-0.018	0.977195	0.0100186	Not significant	YES
AGRN	0.086	0.772453	0.112128	Not significant	NO
AGT	-0.24	0.402586	0.395141	Not significant	NO
AGTPBP1	-0.041	0.936807	0.0283498	Not significant	NO
AGTR1	-0.03	0.935087	0.029148	Not significant	NO
AGTRAP	-0.006	0.992458	0.00328788	Not significant	YES
AGXT2	-0.15	0.588115	0.230538	Not significant	NO
AGXT2L1	-0.053	0.858896	0.0660595	Not significant	NO
AGXT2L2	-0.114	0.725108	0.139597	Not significant	NO
AHCTF1	0.027	0.964774	0.0155745	Not significant	YES
AHCY	0.01	0.987952	0.00526418	Not significant	YES
AHCYL1	0.117	0.770832	0.113041	Not significant	YES
AHCYL2	0.08	0.843496	0.0739171	Not significant	NO
AHDC1	-0.057	0.902592	0.0445083	Not significant	NO
AHI1	0.009	0.988745	0.00491578	Not significant	NO
AHNAK	-0.13	0.678381	0.168526	Not significant	NO
AHR	0.081	0.794885	0.0996957	Not significant	NO
AHSA1	-0.088	0.857175	0.0669305	Not significant	NO
AHSA2	-0.203	0.467524	0.330196	Not significant	NO
AIDA	-0.089	0.84395	0.0736831	Not significant	NO
AIF1	-0.03	0.935347	0.0290274	Not significant	NO
AIFM1	-0.106	0.749168	0.125421	Not significant	NO
AIFM2	-0.144	0.610062	0.214626	Not significant	NO
AIFM3	-1.172	0.170858	0.767364	Not significant	NO
AIG1	-0.107	0.733706	0.134478	Not significant	NO
AIM1	-0.02	0.9643	0.015788	Not significant	NO
AIM1L	-1.166	0.165606	0.780924	Not significant	NO
AIMP1	-0.034	0.956675	0.0192357	Not significant	YES
AIMP2	-0.067	0.887387	0.0518869	Not significant	NO
AIP	-0.201	0.497283	0.303396	Not significant	NO
AK1	-0.068	0.843496	0.0739171	Not significant	NO
AK2	-0.171	0.598169	0.223176	Not significant	YES
AK3	-0.161	0.573161	0.241723	Not significant	NO
AK3L1	0.034	0.928515	0.032211	Not significant	NO
AK7	0.037	0.912442	0.0397949	Not significant	NO
AKAP1	0.02	0.973847	0.0115094	Not significant	NO
AKAP10	0.177	0.503327	0.29815	Not significant	YES
AKAP11	0.084	0.82787	0.0820377	Not significant	NO
AKAP13	-0.001	0.999261	0.0003212	Not significant	NO
AKAP2	0.005	0.990013	0.00435898	Not significant	YES
AKAP3	-0.045	0.892606	0.0493404	Not significant	NO
AKAP5	-0.072	0.805681	0.0938367	Not significant	NO
AKAP6	-0.002	0.998176	0.000792795	Not significant	NO
AKAP7	1.332	0.096061	1.01745	Not significant	NO
AKAP8	-0.068	0.914148	0.0389835	Not significant	NO
AKAP8L	0.021	0.97269	0.0120256	Not significant	NO
AKAP9	0.035	0.931829	0.0306638	Not significant	NO
AKD1	-0.057	0.890929	0.0501568	Not significant	NO
AKIRIN1	0.108	0.784064	0.105649	Not significant	NO
AKIRIN2	-0.084	0.836687	0.077437	Not significant	NO
AKNA	-0.037	0.928515	0.032211	Not significant	NO
AKR1A1	-0.065	0.884175	0.0534617	Not significant	NO
AKR1B1	-0.026	0.941628	0.0261207	Not significant	NO
AKR1B10	0.026	0.938394	0.0276148	Not significant	NO
AKR1C1	-0.055	0.855079	0.0679939	Not significant	NO
AKR1C2	0.008	0.982948	0.00746943	Not significant	NO
AKR1C3	0.026	0.955928	0.0195748	Not significant	NO
AKR1C4	-0.171	0.54246	0.265632	Not significant	NO
AKR1D1	-0.656	0.268188	0.571561	Not significant	NO
AKR1E2	-0.081	0.765944	0.115803	Not significant	NO
AKR7A2	-0.23	0.416371	0.380519	Not significant	NO
AKR7A3	-0.303	0.404594	0.392981	Not significant	NO
AKR7L	-0.338	0.337871	0.471249	Not significant	NO
AKT1	-0.139	0.705256	0.151653	Not significant	NO
AKT1S1	0.031	0.956675	0.0192357	Not significant	NO
AKT2	-0.024	0.970523	0.0129941	Not significant	YES
AKT3	0.092	0.729132	0.137194	Not significant	YES
AKTIP	-0.102	0.765944	0.115803	Not significant	NO
ALAD	-0.218	0.432819	0.363694	Not significant	NO
ALAS1	-0.204	0.468986	0.32884	Not significant	NO
ALB	-0.048	0.8871	0.0520272	Not significant	NO
ALCAM	-0.13	0.662227	0.178993	Not significant	YES
ALDH16A1	-0.025	0.960985	0.0172832	Not significant	NO
ALDH18A1	0.005	0.994776	0.00227458	Not significant	NO
ALDH1A1	0.016	0.969884	0.0132801	Not significant	NO
ALDH1A2	-0.183	0.531417	0.274564	Not significant	NO
ALDH1A3	-0.018	0.961856	0.0168898	Not significant	NO
ALDH1B1	0.022	0.960985	0.0172832	Not significant	NO
ALDH1L1	-0.121	0.654699	0.183959	Not significant	NO
ALDH1L2	0.047	0.886788	0.0521801	Not significant	NO
ALDH2	-0.264	0.379247	0.421078	Not significant	NO
ALDH3A1	-0.047	0.89356	0.0488763	Not significant	NO
ALDH3A2	0.036	0.930004	0.0315153	Not significant	YES
ALDH3B1	-0.004	0.992967	0.00306502	Not significant	NO
ALDH5A1	-0.106	0.711948	0.147552	Not significant	NO
ALDH6A1	-0.337	0.342732	0.465045	Not significant	NO
ALDH7A1	-0.048	0.902592	0.0445083	Not significant	NO
ALDH8A1	-0.108	0.679966	0.167513	Not significant	NO
ALDH9A1	-0.093	0.792895	0.100784	Not significant	NO
ALDOA	0.087	0.765944	0.115803	Not significant	YES
ALDOB	-0.015	0.969053	0.0136526	Not significant	NO
ALG1	0.111	0.787744	0.103615	Not significant	YES
ALG10	0.074	0.865506	0.0627297	Not significant	NO
ALG10B	0.003	0.99657	0.00149237	Not significant	YES
ALG11	0.534	0.182867	0.737864	Not significant	NO
ALG12	0.019	0.973938	0.0114687	Not significant	NO
ALG13	-0.08	0.87078	0.0600914	Not significant	NO
ALG14	-0.137	0.699488	0.15522	Not significant	NO
ALG1L	-0.023	0.949939	0.0223044	Not significant	NO
ALG2	-0.047	0.932828	0.0301982	Not significant	NO
ALG3	-0.085	0.845135	0.0730738	Not significant	NO
ALG5	-0.068	0.893845	0.0487378	Not significant	NO
ALG6	0.035	0.957946	0.0186589	Not significant	NO
ALG8	-0.046	0.935087	0.029148	Not significant	NO
ALG9	-0.052	0.923922	0.0343647	Not significant	YES
ALKBH1	-0.092	0.869706	0.0606277	Not significant	NO
ALKBH2	-0.051	0.902592	0.0445083	Not significant	NO
ALKBH3	-0.173	0.530631	0.275207	Not significant	NO
ALKBH4	-0.018	0.977756	0.00976939	Not significant	NO
ALKBH5	-0.098	0.817621	0.0874481	Not significant	NO
ALKBH6	-0.095	0.78585	0.10466	Not significant	NO
ALKBH7	-0.148	0.59225	0.227495	Not significant	NO
ALKBH8	0.085	0.8748	0.0580914	Not significant	NO
ALMS1	0.115	0.767111	0.115142	Not significant	NO
ALOX12	-0.082	0.757243	0.120765	Not significant	NO
ALOX12P2	0	0.99947	0.000230343	Not significant	NO
ALOX5	0.144	0.599498	0.222212	Not significant	NO
ALOX5AP	0.057	0.844905	0.0731919	Not significant	NO
ALPK1	-0.004	0.995077	0.00214325	Not significant	NO
ALPK2	-0.057	0.838802	0.0763404	Not significant	NO
ALPK3	-0.137	0.604168	0.218842	Not significant	NO
ALPL	-0.262	0.430925	0.365598	Not significant	YES
ALS2	0.006	0.992967	0.00306502	Not significant	YES
ALS2CL	-0.013	0.974818	0.0110763	Not significant	NO
ALS2CR4	-0.009	0.988357	0.00508607	Not significant	NO
ALS2CR8	-0.02	0.97039	0.0130539	Not significant	NO
ALX3	-0.051	0.86892	0.0610204	Not significant	NO
AMACR	-0.089	0.732074	0.135445	Not significant	NO
AMBP	-0.153	0.563842	0.248843	Not significant	NO
AMBRA1	-0.06	0.921734	0.0353943	Not significant	NO
AMD1	0.121	0.742052	0.129566	Not significant	YES
AMDHD1	-1.179	0.140712	0.851669	Not significant	NO
AMDHD2	-0.131	0.662509	0.178808	Not significant	NO
AMFR	-0.516	0.16549	0.781228	Not significant	NO
AMICA1	-0.161	0.54987	0.25974	Not significant	NO
AMIGO1	0.046	0.908058	0.0418862	Not significant	YES
AMIGO2	-0.015	0.969676	0.0133733	Not significant	YES
AMIGO3	0.013	0.978155	0.00959237	Not significant	NO
AMMECR1	0.062	0.896668	0.0473681	Not significant	NO
AMMECR1L	0.053	0.931829	0.0306638	Not significant	YES
AMN	-0.212	0.503327	0.29815	Not significant	NO
AMN1	-0.146	0.669629	0.174166	Not significant	NO
AMOT	0.014	0.971088	0.0127414	Not significant	YES
AMOTL1	-0.003	0.995587	0.00192083	Not significant	YES
AMOTL2	-0.001	0.998822	0.000511903	Not significant	YES
AMPD2	0.077	0.861441	0.0647745	Not significant	NO
AMPD3	0.014	0.97374	0.0115568	Not significant	NO
AMT	-0.38	0.269958	0.568704	Not significant	NO
AMY1A	-0.099	0.71594	0.145123	Not significant	NO
AMY2B	-0.088	0.742013	0.129588	Not significant	NO
AMZ2	0.103	0.816611	0.087985	Not significant	NO
AMZ2P1	-0.117	0.73348	0.134612	Not significant	NO
ANAPC1	0.068	0.892702	0.0492934	Not significant	NO
ANAPC10	-0.075	0.893801	0.048759	Not significant	NO
ANAPC11	-0.1	0.738653	0.131559	Not significant	NO
ANAPC13	-0.063	0.9199	0.0362595	Not significant	NO
ANAPC16	-0.226	0.482314	0.31667	Not significant	NO
ANAPC2	-0.226	0.457872	0.339256	Not significant	NO
ANAPC4	-0.114	0.791588	0.101501	Not significant	NO
ANAPC5	-0.144	0.743586	0.128669	Not significant	NO
ANAPC7	0.002	0.998822	0.000511903	Not significant	NO
ANG	-1.326	0.124324	0.905445	Not significant	YES
ANGEL1	-0.011	0.984633	0.00672542	Not significant	YES
ANGEL2	-0.09	0.849375	0.0709004	Not significant	NO
ANGPT1	-0.055	0.862693	0.0641435	Not significant	NO
ANGPT2	0.031	0.933669	0.0298069	Not significant	NO
ANGPTL3	-2.431	0.0545772	1.26299	Not significant	NO
ANGPTL4	-0.02	0.958565	0.0183783	Not significant	NO
ANGPTL6	-0.226	0.45905	0.33814	Not significant	NO
ANKAR	-0.088	0.795076	0.0995914	Not significant	NO
ANKDD1A	-0.103	0.714995	0.145697	Not significant	NO
ANKFY1	-0.048	0.930789	0.0311488	Not significant	YES
ANKH	0.043	0.924427	0.0341272	Not significant	YES
ANKHD1	-0.03	0.96461	0.0156482	Not significant	NO
ANKHD1-EIF4EBP3	0.269	0.348245	0.458115	Not significant	NO
ANKIB1	0.04	0.935087	0.029148	Not significant	YES
ANKLE2	0.079	0.893801	0.048759	Not significant	NO
ANKMY1	0.002	0.998221	0.000773334	Not significant	NO
ANKMY2	-0.06	0.908319	0.0417617	Not significant	NO
ANKRA2	-0.025	0.966935	0.0146028	Not significant	NO
ANKRD10	0.044	0.930789	0.0311488	Not significant	YES
ANKRD11	0.228	0.459605	0.337615	Not significant	NO
ANKRD12	-0.099	0.795076	0.0995914	Not significant	YES
ANKRD13A	-0.125	0.74513	0.127768	Not significant	NO
ANKRD13B	0.014	0.97142	0.0125929	Not significant	NO
ANKRD13C	0.106	0.797383	0.0983328	Not significant	YES
ANKRD13D	-0.126	0.671601	0.172888	Not significant	NO
ANKRD16	-0.023	0.971019	0.0127725	Not significant	NO
ANKRD17	0.018	0.97374	0.0115568	Not significant	YES
ANKRD19	-0.032	0.927112	0.0328679	Not significant	NO
ANKRD20B	-0.383	0.385003	0.414536	Not significant	NO
ANKRD23	-0.041	0.924427	0.0341272	Not significant	NO
ANKRD24	-0.091	0.739475	0.131077	Not significant	NO
ANKRD26	-0.056	0.896668	0.0473681	Not significant	NO
ANKRD27	0.109	0.741755	0.12974	Not significant	YES
ANKRD28	-0.142	0.705256	0.151653	Not significant	YES
ANKRD29	0.019	0.962242	0.0167157	Not significant	NO
ANKRD32	-0.002	0.998199	0.000782895	Not significant	NO
ANKRD34A	-0.023	0.963071	0.0163419	Not significant	YES
ANKRD35	-0.453	0.335436	0.47439	Not significant	NO
ANKRD36	-0.154	0.570279	0.243913	Not significant	NO
ANKRD36B	-0.032	0.922224	0.0351635	Not significant	NO
ANKRD36BP1	0.021	0.955928	0.0195748	Not significant	NO
ANKRD37	-0.355	0.343538	0.464025	Not significant	NO
ANKRD39	-0.073	0.870493	0.0602347	Not significant	NO
ANKRD40	0.159	0.694584	0.158275	Not significant	YES
ANKRD42	0.02	0.97374	0.0115568	Not significant	YES
ANKRD43	-0.095	0.720084	0.142617	Not significant	NO
ANKRD44	0.055	0.866605	0.0621786	Not significant	NO
ANKRD45	-0.052	0.860198	0.0654018	Not significant	NO
ANKRD46	-0.123	0.679285	0.167948	Not significant	YES
ANKRD49	-0.052	0.930687	0.0311966	Not significant	YES
ANKRD5	0.148	0.598169	0.223176	Not significant	NO
ANKRD50	-0.013	0.978155	0.00959237	Not significant	NO
ANKRD52	0.022	0.969928	0.0132604	Not significant	YES
ANKRD53	-0.028	0.931957	0.0306041	Not significant	NO
ANKRD54	-0.065	0.898575	0.0464457	Not significant	NO
ANKRD55	-0.027	0.935087	0.029148	Not significant	NO
ANKRD56	-0.09	0.737351	0.132326	Not significant	NO
ANKRD57	-0.457	0.207056	0.683913	Not significant	NO
ANKRD58	-0.023	0.955928	0.0195748	Not significant	NO
ANKRD6	0.12	0.705028	0.151794	Not significant	NO
ANKRD9	-0.324	0.299273	0.523933	Not significant	NO
ANKS1A	0.119	0.74513	0.127768	Not significant	NO
ANKS3	0.112	0.727287	0.138294	Not significant	NO
ANKS4B	0.025	0.954689	0.020138	Not significant	NO
ANKS6	-0.017	0.96461	0.0156482	Not significant	YES
ANKZF1	-0.112	0.783436	0.105997	Not significant	NO
ANLN	0.01	0.978307	0.00952479	Not significant	NO
ANO1	-0.052	0.862044	0.0644707	Not significant	NO
ANO10	0.04	0.932828	0.0301982	Not significant	NO
ANO5	0.002	0.996281	0.00161816	Not significant	YES
ANO6	0.018	0.973847	0.0115094	Not significant	NO
ANO7	-0.023	0.958699	0.0183176	Not significant	YES
ANO8	-0.01	0.984912	0.00660247	Not significant	YES
ANP32A	0.032	0.964774	0.0155745	Not significant	NO
ANP32B	0.019	0.97374	0.0115568	Not significant	NO
ANP32E	-0.099	0.808876	0.0921181	Not significant	NO
ANPEP	-0.003	0.99657	0.00149237	Not significant	NO
ANTXR1	0.045	0.89356	0.0488763	Not significant	YES
ANTXR2	0.014	0.977756	0.00976939	Not significant	YES
ANUBL1	0	0.99947	0.000230343	Not significant	NO
ANXA1	-0.027	0.946981	0.0236588	Not significant	NO
ANXA10	-0.653	0.258457	0.587612	Not significant	NO
ANXA11	0.032	0.959083	0.0181438	Not significant	NO
ANXA13	-0.011	0.975526	0.010761	Not significant	NO
ANXA2	0.105	0.720084	0.142617	Not significant	NO
ANXA2P1	0.093	0.750333	0.124746	Not significant	NO
ANXA2P2	0.112	0.695215	0.157881	Not significant	NO
ANXA4	0.263	0.381088	0.418975	Not significant	NO
ANXA5	0.071	0.836743	0.077408	Not significant	NO
ANXA6	-0.213	0.44108	0.355483	Not significant	NO
ANXA7	0.011	0.989903	0.00440721	Not significant	NO
ANXA9	-0.041	0.914168	0.038974	Not significant	NO
AOAH	-0.031	0.924494	0.0340959	Not significant	NO
AOC2	-0.071	0.814882	0.0889054	Not significant	NO
AOC3	-0.032	0.946506	0.0238765	Not significant	NO
AOX1	-0.692	0.232497	0.633582	Not significant	NO
AP1AR	0.015	0.978155	0.00959237	Not significant	NO
AP1B1	0.101	0.840054	0.0756926	Not significant	NO
AP1G1	0.101	0.821048	0.0856314	Not significant	YES
AP1G2	-0.002	0.99674	0.00141807	Not significant	NO
AP1M1	-0.098	0.826426	0.0827963	Not significant	NO
AP1M2	0.008	0.98363	0.00716838	Not significant	NO
AP1S1	-0.014	0.981011	0.00832633	Not significant	NO
AP1S2	-0.015	0.974818	0.0110763	Not significant	NO
AP1S3	0.112	0.693952	0.158671	Not significant	NO
AP2A1	0.045	0.944644	0.0247319	Not significant	NO
AP2A2	-0.175	0.667467	0.17557	Not significant	NO
AP2B1	0.165	0.629884	0.200739	Not significant	NO
AP2M1	-0.262	0.372285	0.429124	Not significant	NO
AP2S1	-0.064	0.886137	0.0524991	Not significant	NO
AP3B1	0.164	0.668895	0.174642	Not significant	YES
AP3D1	-0.075	0.889286	0.0509586	Not significant	NO
AP3M1	-0.034	0.964145	0.0158578	Not significant	YES
AP3M2	0.046	0.918611	0.0368684	Not significant	YES
AP3S1	-0.125	0.733295	0.134721	Not significant	NO
AP3S2	-0.063	0.908319	0.0417617	Not significant	YES
AP4B1	0.061	0.913288	0.0393925	Not significant	NO
AP4E1	-0.086	0.870493	0.0602347	Not significant	NO
AP4M1	0.078	0.858663	0.0661772	Not significant	NO
AP4S1	-0.133	0.672218	0.17249	Not significant	NO
APAF1	0.003	0.99657	0.00149237	Not significant	NO
APBA1	-0.125	0.633278	0.198405	Not significant	YES
APBA2	-0.09	0.73348	0.134612	Not significant	NO
APBA3	-0.108	0.795076	0.0995914	Not significant	NO
APBB1	-0.293	0.326321	0.486355	Not significant	NO
APBB1IP	-0.053	0.869937	0.0605122	Not significant	NO
APBB2	-0.082	0.827327	0.0823229	Not significant	YES
APBB3	-0.105	0.721926	0.141508	Not significant	NO
APC	0.126	0.717914	0.143928	Not significant	NO
APC2	-0.137	0.601192	0.220987	Not significant	YES
APCS	-0.054	0.857175	0.0669305	Not significant	NO
APEH	-0.235	0.424599	0.372021	Not significant	NO
APEX1	0.06	0.919181	0.0365988	Not significant	NO
APEX2	0.018	0.978155	0.00959237	Not significant	NO
APH1A	-0.13	0.756437	0.121227	Not significant	NO
APH1B	0.013	0.978155	0.00959237	Not significant	NO
API5	-0.056	0.931957	0.0306041	Not significant	NO
APIP	-0.119	0.757243	0.120765	Not significant	NO
APITD1	-0.058	0.898845	0.0463153	Not significant	NO
APLF	-0.02	0.968497	0.0139015	Not significant	NO
APLN	-0.128	0.622382	0.205943	Not significant	NO
APLNR	0.002	0.996281	0.00161816	Not significant	NO
APLP2	-0.206	0.486458	0.312954	Not significant	NO
APOA1BP	-0.098	0.783296	0.106074	Not significant	NO
APOB	-0.137	0.604168	0.218842	Not significant	NO
APOB48R	-0.005	0.992569	0.00323918	Not significant	NO
APOBEC3A	0.045	0.894897	0.0482269	Not significant	NO
APOBEC3B	0.066	0.80663	0.0933258	Not significant	NO
APOBEC3C	0.007	0.98753	0.00544981	Not significant	NO
APOBEC3D	0.04	0.907714	0.0420509	Not significant	YES
APOBEC3F	0.103	0.709427	0.149092	Not significant	NO
APOBEC3G	0.017	0.966935	0.0146028	Not significant	NO
APOBEC3H	-0.06	0.83375	0.078964	Not significant	NO
APOC1	-1.64	0.0923083	1.03476	Not significant	NO
APOC1P1	-1.354	0.160323	0.795003	Not significant	NO
APOC2	-0.329	0.342732	0.465045	Not significant	NO
APOD	-0.046	0.886137	0.0524991	Not significant	NO
APOE	-0.761	0.165461	0.781303	Not significant	NO
APOL1	-0.01	0.982969	0.00746019	Not significant	NO
APOL2	0.005	0.993505	0.0028299	Not significant	NO
APOL3	-0.02	0.960985	0.0172832	Not significant	YES
APOL4	-0.034	0.920564	0.0359462	Not significant	YES
APOL6	-0.03	0.949678	0.0224236	Not significant	YES
APOLD1	-0.037	0.918167	0.0370783	Not significant	NO
APOM	-0.221	0.465449	0.332128	Not significant	NO
APOO	-0.086	0.827327	0.0823229	Not significant	NO
APOOL	0.038	0.922241	0.0351558	Not significant	YES
APP	0.071	0.824175	0.0839804	Not significant	YES
APPBP2	0.099	0.823348	0.0844164	Not significant	YES
APPL1	0.001	0.998822	0.000511903	Not significant	NO
APPL2	0.041	0.945085	0.024529	Not significant	NO
APRT	0	0.99947	0.000230343	Not significant	NO
APTX	-0.148	0.695215	0.157881	Not significant	YES
AQP11	-0.158	0.551669	0.258321	Not significant	NO
AQP3	-0.157	0.552347	0.257788	Not significant	NO
AQP7	-0.735	0.187405	0.72722	Not significant	NO
AQP7P1	-0.787	0.235861	0.627344	Not significant	NO
AQP7P3	-0.278	0.461818	0.335529	Not significant	NO
AQR	0.039	0.952116	0.0213102	Not significant	NO
AR	-0.004	0.991231	0.0038251	Not significant	NO
ARAF	-0.06	0.905155	0.043277	Not significant	NO
ARAP1	-0.1	0.828808	0.0815458	Not significant	NO
ARAP2	0.071	0.823389	0.0843951	Not significant	NO
ARAP3	0.131	0.641135	0.19305	Not significant	NO
ARC	-0.331	0.419598	0.377167	Not significant	YES
ARCN1	0.019	0.978155	0.00959237	Not significant	NO
ARF1	-0.068	0.902592	0.0445083	Not significant	NO
ARF3	0.234	0.467581	0.330144	Not significant	NO
ARF4	-0.077	0.886141	0.0524973	Not significant	NO
ARF5	-0.088	0.837698	0.0769124	Not significant	NO
ARF6	-0.005	0.996281	0.00161816	Not significant	NO
ARFGAP1	-0.059	0.908319	0.0417617	Not significant	YES
ARFGAP2	-0.189	0.588115	0.230538	Not significant	NO
ARFGAP3	-0.055	0.918611	0.0368684	Not significant	YES
ARFGEF1	-0.097	0.808876	0.0921181	Not significant	YES
ARFGEF2	-0.023	0.967756	0.0142343	Not significant	YES
ARFIP1	0.02	0.974455	0.0112381	Not significant	NO
ARFIP2	-0.117	0.772521	0.11209	Not significant	NO
ARFRP1	-0.121	0.72788	0.13794	Not significant	NO
ARG1	-0.013	0.971019	0.0127725	Not significant	NO
ARGLU1	-0.122	0.715195	0.145576	Not significant	NO
ARHGAP1	0.059	0.916653	0.0377951	Not significant	NO
ARHGAP10	-0.076	0.781125	0.107279	Not significant	YES
ARHGAP11A	-0.019	0.96461	0.0156482	Not significant	YES
ARHGAP11B	-0.003	0.995587	0.00192083	Not significant	NO
ARHGAP12	-0.047	0.922075	0.035234	Not significant	NO
ARHGAP15	-0.03	0.935087	0.029148	Not significant	NO
ARHGAP17	0.083	0.885809	0.0526599	Not significant	NO
ARHGAP18	0.038	0.928515	0.032211	Not significant	NO
ARHGAP19	-0.113	0.765619	0.115987	Not significant	NO
ARHGAP20	-0.016	0.964774	0.0155745	Not significant	NO
ARHGAP21	-0.009	0.989903	0.00440721	Not significant	NO
ARHGAP22	0.022	0.956632	0.0192552	Not significant	YES
ARHGAP23	-0.025	0.956453	0.0193364	Not significant	NO
ARHGAP24	-0.051	0.886706	0.0522201	Not significant	NO
ARHGAP25	-0.064	0.86048	0.0652593	Not significant	NO
ARHGAP26	0.129	0.672535	0.172285	Not significant	NO
ARHGAP27	0.106	0.719263	0.143112	Not significant	NO
ARHGAP29	0.388	0.251514	0.599438	Not significant	YES
ARHGAP30	-0.037	0.921734	0.0353943	Not significant	NO
ARHGAP31	0.016	0.971224	0.0126804	Not significant	YES
ARHGAP32	-0.024	0.964145	0.0158578	Not significant	YES
ARHGAP33	-0.085	0.782061	0.106759	Not significant	NO
ARHGAP39	-0.06	0.862853	0.0640631	Not significant	NO
ARHGAP4	-0.149	0.572834	0.241971	Not significant	NO
ARHGAP42	0.016	0.971292	0.0126503	Not significant	YES
ARHGAP5	0.041	0.936807	0.0283498	Not significant	NO
ARHGAP6	0.016	0.970756	0.0128898	Not significant	NO
ARHGAP9	-0.074	0.787779	0.103596	Not significant	YES
ARHGDIA	-0.116	0.766082	0.115725	Not significant	NO
ARHGDIB	-0.005	0.992569	0.00323918	Not significant	NO
ARHGEF1	0.049	0.931957	0.0306041	Not significant	NO
ARHGEF10	-0.013	0.973943	0.0114665	Not significant	NO
ARHGEF10L	-0.145	0.63128	0.199778	Not significant	NO
ARHGEF11	0.038	0.94251	0.0257139	Not significant	NO
ARHGEF12	-0.006	0.992569	0.00323918	Not significant	NO
ARHGEF15	-0.018	0.971088	0.0127414	Not significant	NO
ARHGEF16	0.047	0.882871	0.0541027	Not significant	NO
ARHGEF17	0.026	0.95219	0.0212765	Not significant	NO
ARHGEF18	0.068	0.894897	0.0482269	Not significant	NO
ARHGEF19	-0.02	0.960912	0.0173164	Not significant	NO
ARHGEF2	-0.014	0.973847	0.0115094	Not significant	NO
ARHGEF3	0.004	0.993946	0.00263704	Not significant	NO
ARHGEF33	-0.038	0.908319	0.0417617	Not significant	YES
ARHGEF35	0.045	0.897292	0.0470664	Not significant	NO
ARHGEF37	0.08	0.765944	0.115803	Not significant	YES
ARHGEF5	0	0.99947	0.000230343	Not significant	NO
ARHGEF6	-0.037	0.924427	0.0341272	Not significant	NO
ARHGEF7	-0.003	0.99657	0.00149237	Not significant	YES
ARHGEF9	-0.111	0.752788	0.123327	Not significant	YES
ARID1A	0.014	0.98023	0.00867197	Not significant	NO
ARID1B	0.122	0.726482	0.138775	Not significant	NO
ARID2	0.171	0.601931	0.220453	Not significant	NO
ARID3A	-0.037	0.90827	0.0417849	Not significant	YES
ARID3B	0.018	0.971311	0.0126415	Not significant	YES
ARID3C	-0.141	0.607754	0.216272	Not significant	NO
ARID4A	-0.163	0.574902	0.240406	Not significant	NO
ARID4B	0.023	0.970184	0.0131458	Not significant	NO
ARID5A	-0.153	0.583828	0.233715	Not significant	NO
ARID5B	0.051	0.901951	0.0448172	Not significant	YES
ARIH1	-0.062	0.912141	0.039938	Not significant	NO
ARIH2	-0.184	0.613363	0.212282	Not significant	NO
ARL1	0.039	0.957777	0.0187354	Not significant	NO
ARL10	-0.06	0.845454	0.0729101	Not significant	NO
ARL11	0.317	0.326321	0.486355	Not significant	NO
ARL13B	0.018	0.973417	0.0117011	Not significant	NO
ARL15	0.059	0.889286	0.0509586	Not significant	NO
ARL16	-0.036	0.939175	0.0272534	Not significant	NO
ARL17A	0.044	0.929576	0.0317149	Not significant	NO
ARL2	0.019	0.969108	0.0136279	Not significant	YES
ARL2BP	0.023	0.972448	0.0121337	Not significant	NO
ARL3	-0.126	0.715195	0.145576	Not significant	NO
ARL4A	0.009	0.983195	0.00736054	Not significant	NO
ARL4C	0.076	0.786441	0.104334	Not significant	NO
ARL4D	-0.269	0.38677	0.412547	Not significant	NO
ARL5A	0.128	0.745615	0.127486	Not significant	NO
ARL5B	0.018	0.97039	0.0130539	Not significant	NO
ARL6	-0.031	0.950735	0.0219407	Not significant	NO
ARL6IP1	-0.095	0.792895	0.100784	Not significant	NO
ARL6IP4	-0.142	0.639542	0.194131	Not significant	NO
ARL6IP5	0.054	0.918167	0.0370783	Not significant	NO
ARL6IP6	0.009	0.989903	0.00440721	Not significant	NO
ARL8A	-0.121	0.737351	0.132326	Not significant	NO
ARL8B	-0.13	0.773633	0.111465	Not significant	NO
ARMC1	-0.018	0.973847	0.0115094	Not significant	NO
ARMC10	-0.026	0.971199	0.012692	Not significant	YES
ARMC2	0.142	0.633338	0.198364	Not significant	NO
ARMC5	-0.034	0.9315	0.0308171	Not significant	NO
ARMC6	-0.026	0.956341	0.0193872	Not significant	NO
ARMC7	0.08	0.838802	0.0763404	Not significant	NO
ARMC8	-0.046	0.947554	0.0233962	Not significant	NO
ARMC9	0.061	0.842647	0.0743543	Not significant	NO
ARMCX1	-0.019	0.9643	0.015788	Not significant	NO
ARMCX2	-0.003	0.995938	0.0017679	Not significant	NO
ARMCX3	0.026	0.940958	0.0264297	Not significant	YES
ARMCX5	0.122	0.725108	0.139597	Not significant	NO
ARMCX6	0.062	0.833627	0.079028	Not significant	YES
ARNT	-0.074	0.874563	0.0582088	Not significant	NO
ARNT2	0.069	0.801146	0.0962885	Not significant	NO
ARNTL	-0.063	0.862068	0.0644587	Not significant	NO
ARNTL2	0.159	0.560328	0.251558	Not significant	YES
ARPC1A	-0.012	0.98753	0.00544981	Not significant	NO
ARPC1B	-0.004	0.993483	0.00283936	Not significant	NO
ARPC2	0.024	0.973445	0.0116886	Not significant	NO
ARPC3	-0.08	0.867337	0.0618121	Not significant	NO
ARPC4	-0.085	0.861864	0.0645615	Not significant	NO
ARPC5	-0.033	0.960656	0.0174322	Not significant	NO
ARPC5L	-0.013	0.983847	0.00707249	Not significant	NO
ARPM1	-0.02	0.967025	0.0145624	Not significant	NO
ARPP19	0.022	0.973938	0.0114687	Not significant	YES
ARRB1	-0.048	0.892606	0.0493404	Not significant	YES
ARRB2	-0.039	0.935014	0.029182	Not significant	YES
ARRDC1	-0.189	0.538969	0.268436	Not significant	NO
ARRDC2	0.08	0.771006	0.112942	Not significant	NO
ARRDC3	-0.069	0.842899	0.0742245	Not significant	NO
ARRDC4	-0.001	0.998568	0.000622341	Not significant	NO
ARSA	-0.918	0.101929	0.991702	Not significant	YES
ARSB	-0.057	0.89291	0.0491924	Not significant	NO
ARSD	-0.089	0.770832	0.113041	Not significant	NO
ARSE	-0.059	0.839514	0.0759721	Not significant	YES
ARSG	-0.12	0.645374	0.190189	Not significant	YES
ARSJ	0.011	0.976812	0.0101892	Not significant	NO
ARSK	-0.008	0.990013	0.00435898	Not significant	NO
ART4	0.014	0.971019	0.0127725	Not significant	YES
ARTN	0.051	0.872764	0.0591031	Not significant	NO
ARV1	-0.016	0.978155	0.00959237	Not significant	NO
ARVCF	-0.098	0.765944	0.115803	Not significant	NO
AS3MT	-0.269	0.381227	0.418816	Not significant	NO
ASAH1	-0.016	0.972448	0.0121337	Not significant	YES
ASAH2	-0.056	0.84395	0.0736831	Not significant	YES
ASAP1	0.002	0.998176	0.000792795	Not significant	NO
ASAP2	0.043	0.908319	0.0417617	Not significant	NO
ASB1	0.008	0.990013	0.00435898	Not significant	YES
ASB13	-0.148	0.589548	0.229481	Not significant	NO
ASB14	-0.001	0.998822	0.000511903	Not significant	YES
ASB16	-0.003	0.995587	0.00192083	Not significant	NO
ASB2	-0.02	0.958565	0.0183783	Not significant	NO
ASB3	0.033	0.963071	0.0163419	Not significant	NO
ASB6	-0.06	0.914565	0.0387853	Not significant	YES
ASB7	-0.01	0.989947	0.00438822	Not significant	NO
ASB8	0	0.999902	4.25209e-05	Not significant	NO
ASB9	0.008	0.98511	0.00651518	Not significant	NO
ASCC1	-0.076	0.885809	0.0526599	Not significant	YES
ASCC2	-0.071	0.902262	0.0446675	Not significant	NO
ASCC3	0.047	0.918167	0.0370783	Not significant	NO
ASF1A	0.026	0.966352	0.0148644	Not significant	YES
ASF1B	0.02	0.960519	0.0174939	Not significant	NO
ASGR1	-0.878	0.152039	0.818046	Not significant	NO
ASGR2	-0.174	0.508786	0.293465	Not significant	NO
ASH1L	0.483	0.19615	0.707412	Not significant	YES
ASH2L	0.042	0.936343	0.0285649	Not significant	YES
ASL	-0.162	0.543971	0.264424	Not significant	NO
ASMTL	-0.24	0.398669	0.399388	Not significant	NO
ASNA1	0.031	0.963472	0.0161609	Not significant	YES
ASNS	-0.22	0.480664	0.318158	Not significant	NO
ASNSD1	-0.051	0.941019	0.0264015	Not significant	NO
ASPA	-0.031	0.923234	0.0346881	Not significant	NO
ASPG	-0.535	0.313831	0.503304	Not significant	NO
ASPH	0.029	0.941019	0.0264015	Not significant	NO
ASPHD1	-0.01	0.976386	0.0103783	Not significant	NO
ASPHD2	0	0.999902	4.25209e-05	Not significant	NO
ASPM	0.002	0.99657	0.00149237	Not significant	NO
ASPN	0.041	0.901524	0.0450226	Not significant	NO
ASPRV1	-0.163	0.550067	0.259584	Not significant	NO
ASPSCR1	-0.078	0.786423	0.104344	Not significant	NO
ASRGL1	-0.033	0.922075	0.035234	Not significant	NO
ASS1	-0.963	0.160323	0.795003	Not significant	NO
ASTE1	-0.249	0.422375	0.374302	Not significant	NO
ASTN2	-0.028	0.950735	0.0219407	Not significant	YES
ASXL1	-0.068	0.902592	0.0445083	Not significant	YES
ASXL2	0.045	0.89708	0.0471687	Not significant	YES
ATAD1	0.135	0.73348	0.134612	Not significant	NO
ATAD2	-0.152	0.568645	0.245159	Not significant	NO
ATAD2B	-0.168	0.599498	0.222212	Not significant	NO
ATAD3A	-0.024	0.964774	0.0155745	Not significant	NO
ATAD3B	-0.05	0.900812	0.0453659	Not significant	NO
ATAD3C	-0.044	0.891694	0.0497844	Not significant	NO
ATAD5	0.057	0.863864	0.0635548	Not significant	NO
ATE1	0.064	0.843496	0.0739171	Not significant	YES
ATF1	0.071	0.897227	0.0470978	Not significant	NO
ATF2	0.049	0.901951	0.0448172	Not significant	NO
ATF3	-0.099	0.715195	0.145576	Not significant	NO
ATF4	0.031	0.957547	0.0188399	Not significant	NO
ATF5	-0.355	0.365473	0.437145	Not significant	NO
ATF6	-0.029	0.958699	0.0183176	Not significant	YES
ATF6B	0.105	0.800033	0.0968919	Not significant	NO
ATF7	0.197	0.519018	0.284818	Not significant	YES
ATF7IP	0.287	0.32442	0.488892	Not significant	YES
ATF7IP2	0.003	0.99657	0.00149237	Not significant	NO
ATG10	0.045	0.925691	0.0335338	Not significant	NO
ATG12	-0.004	0.997025	0.00129409	Not significant	NO
ATG16L1	0.076	0.902592	0.0445083	Not significant	NO
ATG16L2	-0.294	0.318784	0.496504	Not significant	NO
ATG2A	-0.078	0.869556	0.0607023	Not significant	NO
ATG2B	0.011	0.98753	0.00544981	Not significant	NO
ATG3	-0.275	0.372214	0.429208	Not significant	NO
ATG4A	-0.173	0.570266	0.243922	Not significant	NO
ATG4B	-0.385	0.210413	0.676927	Not significant	NO
ATG4C	0.004	0.996307	0.00160696	Not significant	NO
ATG4D	-0.002	0.998394	0.000698124	Not significant	NO
ATG5	0.008	0.991764	0.00359151	Not significant	NO
ATG7	-0.047	0.936462	0.0285097	Not significant	NO
ATG9A	-0.056	0.922075	0.035234	Not significant	NO
ATG9B	0.001	0.998822	0.000511903	Not significant	NO
ATHL1	-0.132	0.612731	0.21273	Not significant	NO
ATIC	0.134	0.692441	0.159617	Not significant	NO
ATL1	-0.031	0.93816	0.0277233	Not significant	NO
ATL2	-0.122	0.760015	0.119178	Not significant	NO
ATL3	0.014	0.978155	0.00959237	Not significant	YES
ATM	0.029	0.960985	0.0172832	Not significant	NO
ATMIN	0.281	0.343538	0.464025	Not significant	YES
ATN1	0.08	0.86048	0.0652593	Not significant	NO
ATOH7	-0.029	0.930719	0.0311813	Not significant	NO
ATOH8	-0.038	0.90334	0.0441486	Not significant	YES
ATOX1	-0.079	0.794991	0.0996379	Not significant	NO
ATP10D	0.035	0.930687	0.0311966	Not significant	NO
ATP11A	0.043	0.917614	0.03734	Not significant	YES
ATP11B	-0.009	0.989903	0.00440721	Not significant	NO
ATP11C	-0.065	0.837963	0.0767751	Not significant	NO
ATP13A1	0.042	0.947576	0.0233859	Not significant	NO
ATP13A2	0.021	0.969123	0.0136212	Not significant	NO
ATP13A3	-0.035	0.949939	0.0223044	Not significant	YES
ATP1A1	0.081	0.806748	0.0932622	Not significant	YES
ATP1B1	0.158	0.552079	0.257999	Not significant	NO
ATP1B2	-0.021	0.955928	0.0195748	Not significant	YES
ATP1B3	-0.005	0.992458	0.00328788	Not significant	NO
ATP2A1	0.005	0.990013	0.00435898	Not significant	NO
ATP2A2	0.069	0.893796	0.0487618	Not significant	NO
ATP2A3	-0.003	0.995722	0.00186172	Not significant	YES
ATP2B1	0.146	0.614755	0.211298	Not significant	YES
ATP2B2	-0.989	0.152039	0.818046	Not significant	YES
ATP2B4	0.012	0.978155	0.00959237	Not significant	YES
ATP2C1	-0.076	0.894897	0.0482269	Not significant	NO
ATP5A1	-0.095	0.82787	0.0820377	Not significant	NO
ATP5B	-0.055	0.917104	0.0375816	Not significant	NO
ATP5C1	-0.215	0.478475	0.32014	Not significant	NO
ATP5D	-0.083	0.779204	0.108349	Not significant	NO
ATP5E	-0.078	0.814443	0.0891395	Not significant	NO
ATP5EP2	-0.069	0.82787	0.0820377	Not significant	NO
ATP5F1	0.042	0.949939	0.0223044	Not significant	YES
ATP5G1	-0.002	0.998176	0.000792795	Not significant	NO
ATP5G2	0.06	0.902592	0.0445083	Not significant	NO
ATP5G3	-0.253	0.379196	0.421137	Not significant	NO
ATP5H	-0.033	0.953907	0.0204939	Not significant	NO
ATP5I	-0.091	0.761195	0.118504	Not significant	NO
ATP5J	-0.255	0.373769	0.427397	Not significant	NO
ATP5J2	-0.093	0.765944	0.115803	Not significant	NO
ATP5L	-0.125	0.722157	0.141368	Not significant	NO
ATP5O	-0.067	0.885809	0.0526599	Not significant	NO
ATP5S	-0.075	0.883033	0.0540232	Not significant	NO
ATP5SL	0.071	0.902592	0.0445083	Not significant	YES
ATP6AP1	-0.085	0.859566	0.0657208	Not significant	NO
ATP6AP1L	-0.492	0.242077	0.616046	Not significant	NO
ATP6AP2	0.029	0.968391	0.013949	Not significant	NO
ATP6V0A1	0.058	0.902592	0.0445083	Not significant	NO
ATP6V0A2	0.024	0.972448	0.0121337	Not significant	YES
ATP6V0B	-0.082	0.82787	0.0820377	Not significant	NO
ATP6V0C	-0.027	0.965428	0.0152802	Not significant	NO
ATP6V0D1	-0.039	0.945691	0.0242505	Not significant	NO
ATP6V0E1	-0.055	0.908319	0.0417617	Not significant	YES
ATP6V0E2	-0.075	0.792422	0.101044	Not significant	NO
ATP6V1A	-0.146	0.720177	0.142561	Not significant	NO
ATP6V1B2	-0.12	0.736866	0.132612	Not significant	NO
ATP6V1C1	-0.047	0.918167	0.0370783	Not significant	YES
ATP6V1C2	-0.086	0.827327	0.0823229	Not significant	YES
ATP6V1D	-0.085	0.876661	0.0571685	Not significant	NO
ATP6V1E1	-0.007	0.992569	0.00323918	Not significant	NO
ATP6V1E2	-0.025	0.956341	0.0193872	Not significant	NO
ATP6V1F	-0.024	0.967308	0.0144353	Not significant	NO
ATP6V1G1	-0.144	0.678381	0.168526	Not significant	NO
ATP6V1G2	-0.009	0.982497	0.00766875	Not significant	NO
ATP6V1H	-0.102	0.780418	0.107673	Not significant	YES
ATP7A	0.179	0.525864	0.279126	Not significant	NO
ATP7B	-0.089	0.765011	0.116333	Not significant	YES
ATP8A1	-0.074	0.791588	0.101501	Not significant	NO
ATP8B1	-0.025	0.959414	0.0179942	Not significant	NO
ATP8B2	0.02	0.9643	0.015788	Not significant	YES
ATP8B3	0.056	0.860965	0.0650144	Not significant	NO
ATP8B4	-0.096	0.733706	0.134478	Not significant	NO
ATP8B5P	0.048	0.908319	0.0417617	Not significant	NO
ATP9A	0.072	0.828362	0.0817796	Not significant	YES
ATP9B	-0.135	0.688235	0.162263	Not significant	NO
ATPAF1	0	0.99947	0.000230343	Not significant	NO
ATPAF2	-0.042	0.93297	0.0301325	Not significant	YES
ATPBD4	-0.16	0.59988	0.221935	Not significant	NO
ATPIF1	-0.507	0.176529	0.753183	Not significant	NO
ATR	0.065	0.903107	0.0442609	Not significant	NO
ATRIP	0.001	0.998822	0.000511903	Not significant	NO
ATRN	-0.074	0.841465	0.0749641	Not significant	YES
ATRX	0.128	0.707603	0.150211	Not significant	YES
ATXN1	-0.074	0.863864	0.0635548	Not significant	NO
ATXN10	0.115	0.79631	0.0989178	Not significant	NO
ATXN1L	0.162	0.593745	0.2264	Not significant	NO
ATXN2	0.02	0.977756	0.00976939	Not significant	NO
ATXN2L	0.199	0.550067	0.259584	Not significant	NO
ATXN3	-0.101	0.810025	0.0915014	Not significant	NO
ATXN7	-0.074	0.885809	0.0526599	Not significant	NO
ATXN7L1	0.007	0.990013	0.00435898	Not significant	NO
ATXN7L2	0.07	0.86892	0.0610204	Not significant	NO
ATXN7L3	0.135	0.720084	0.142617	Not significant	NO
ATXN7L3B	0.056	0.90827	0.0417849	Not significant	NO
AUH	-0.129	0.689836	0.161254	Not significant	NO
AUP1	-0.097	0.828808	0.0815458	Not significant	NO
AURKA	-0.048	0.897716	0.0468609	Not significant	NO
AURKAIP1	-0.072	0.841684	0.0748511	Not significant	NO
AURKAPS1	0.009	0.983242	0.00733976	Not significant	NO
AURKB	-0.086	0.741948	0.129627	Not significant	NO
AURKC	-1.281	0.166684	0.778106	Not significant	NO
AUTS2	-0.028	0.936119	0.0286689	Not significant	NO
AVEN	-0.098	0.786423	0.104344	Not significant	NO
AVL9	0.072	0.882871	0.0541027	Not significant	YES
AVPI1	-0.085	0.784064	0.105649	Not significant	NO
AVPR2	-0.067	0.804198	0.0946371	Not significant	NO
AXIN1	0.059	0.901088	0.0452328	Not significant	NO
AXIN2	-0.106	0.701213	0.15415	Not significant	NO
AXL	0.051	0.890929	0.0501568	Not significant	YES
AZGP1	-1.374	0.123929	0.906826	Not significant	YES
AZI1	0.036	0.935951	0.028747	Not significant	NO
AZI2	-0.075	0.897716	0.0468609	Not significant	NO
AZIN1	-0.061	0.892733	0.0492786	Not significant	NO
B2M	-0.181	0.502834	0.298575	Not significant	NO
B3GALNT1	-0.045	0.899651	0.0459258	Not significant	NO
B3GALNT2	0.108	0.79484	0.0997204	Not significant	NO
B3GALT4	-0.068	0.809176	0.091957	Not significant	NO
B3GALT6	0.004	0.995938	0.0017679	Not significant	NO
B3GALTL	-0.136	0.682998	0.165581	Not significant	NO
B3GAT1	-0.026	0.939143	0.0272683	Not significant	NO
B3GAT2	0.002	0.99657	0.00149237	Not significant	YES
B3GAT3	-0.314	0.297547	0.526444	Not significant	NO
B3GNT1	-0.264	0.35447	0.45042	Not significant	NO
B3GNT2	-0.008	0.990013	0.00435898	Not significant	YES
B3GNT3	0.056	0.845135	0.0730738	Not significant	NO
B3GNT5	-0.009	0.979961	0.00879115	Not significant	NO
B3GNT8	-0.041	0.898575	0.0464457	Not significant	NO
B3GNT9	-0.033	0.924427	0.0341272	Not significant	NO
B3GNTL1	0.039	0.918167	0.0370783	Not significant	NO
B4GALNT1	-0.029	0.924427	0.0341272	Not significant	NO
B4GALNT3	0.004	0.992569	0.00323918	Not significant	NO
B4GALT1	-0.022	0.971088	0.0127414	Not significant	YES
B4GALT2	-0.134	0.688629	0.162015	Not significant	NO
B4GALT3	-0.049	0.930517	0.0312758	Not significant	NO
B4GALT4	-0.158	0.643488	0.19146	Not significant	YES
B4GALT5	0.073	0.857097	0.06697	Not significant	NO
B4GALT6	-0.021	0.964361	0.0157602	Not significant	YES
B4GALT7	-0.052	0.916605	0.0378177	Not significant	NO
B9D1	-0.123	0.644368	0.190866	Not significant	NO
B9D2	0.048	0.90827	0.0417849	Not significant	NO
BAALC	-0.209	0.502834	0.298575	Not significant	NO
BAAT	-0.353	0.325705	0.487176	Not significant	YES
BACE1	-0.226	0.43845	0.35808	Not significant	YES
BACH1	0.065	0.885173	0.0529716	Not significant	YES
BACH2	-0.058	0.84395	0.0736831	Not significant	YES
BAD	-0.119	0.716433	0.144824	Not significant	NO
BAG1	-0.124	0.705256	0.151653	Not significant	NO
BAG2	-0.019	0.969512	0.0134468	Not significant	NO
BAG3	-0.04	0.924427	0.0341272	Not significant	NO
BAG4	0.037	0.922224	0.0351635	Not significant	NO
BAG5	0.072	0.908319	0.0417617	Not significant	YES
BAHCC1	0.128	0.648022	0.18841	Not significant	NO
BAHD1	-0.106	0.800246	0.0967762	Not significant	NO
BAIAP2	-0.499	0.215681	0.666188	Not significant	NO
BAIAP2L1	0.017	0.970523	0.0129941	Not significant	YES
BAIAP2L2	0.036	0.908319	0.0417617	Not significant	NO
BAIAP3	-0.206	0.460976	0.336322	Not significant	NO
BAK1	0.075	0.836136	0.0777229	Not significant	NO
BAMBI	0.069	0.802427	0.0955945	Not significant	NO
BANF1	-0.133	0.691663	0.160105	Not significant	NO
BANP	0.025	0.967025	0.0145624	Not significant	NO
BAP1	-0.089	0.845135	0.0730738	Not significant	NO
BARD1	0.028	0.932828	0.0301982	Not significant	NO
BAT1	-0.154	0.694732	0.158183	Not significant	NO
BAT2	0.038	0.950735	0.0219407	Not significant	NO
BAT2L1	0.111	0.758359	0.120125	Not significant	NO
BAT2L2	0.165	0.598169	0.223176	Not significant	NO
BAT3	-0.056	0.923234	0.0346881	Not significant	NO
BAT4	-0.168	0.563842	0.248843	Not significant	NO
BAT5	-0.236	0.4243	0.372327	Not significant	NO
BATF	-0.017	0.9643	0.015788	Not significant	NO
BATF2	0.03	0.935273	0.0290616	Not significant	YES
BATF3	-0.026	0.947615	0.0233682	Not significant	NO
BAX	-0.006	0.992458	0.00328788	Not significant	NO
BAZ1A	0.094	0.79774	0.0981387	Not significant	NO
BAZ1B	0.076	0.894724	0.0483107	Not significant	NO
BAZ2A	0.113	0.773998	0.11126	Not significant	NO
BAZ2B	0.07	0.86892	0.0610204	Not significant	YES
BBC3	-0.059	0.891455	0.0499004	Not significant	NO
BBOX1	-0.037	0.907714	0.0420509	Not significant	NO
BBS1	0.085	0.823839	0.0841575	Not significant	NO
BBS10	0.001	0.99947	0.000230343	Not significant	NO
BBS12	0.153	0.58565	0.232362	Not significant	YES
BBS2	-0.309	0.31046	0.507994	Not significant	NO
BBS4	-0.009	0.990013	0.00435898	Not significant	NO
BBS5	-0.013	0.973943	0.0114665	Not significant	NO
BBS7	0.111	0.705285	0.151635	Not significant	NO
BBS9	0.016	0.977195	0.0100186	Not significant	NO
BBX	0.027	0.960656	0.0174322	Not significant	YES
BCAM	-0.024	0.954943	0.0200226	Not significant	NO
BCAN	-0.015	0.96684	0.0146453	Not significant	NO
BCAP29	-0.102	0.823385	0.0843973	Not significant	NO
BCAP31	-0.098	0.765944	0.115803	Not significant	YES
BCAR1	0.075	0.869646	0.0606576	Not significant	NO
BCAR3	0.026	0.96341	0.0161889	Not significant	NO
BCAS1	-0.016	0.964633	0.015638	Not significant	YES
BCAS2	0.042	0.952066	0.0213331	Not significant	YES
BCAS3	-0.038	0.939378	0.0271597	Not significant	NO
BCAS4	-0.006	0.992007	0.00348532	Not significant	YES
BCAT2	0.078	0.792422	0.101044	Not significant	YES
BCCIP	-0.059	0.920894	0.0357902	Not significant	NO
BCDIN3D	0.013	0.988357	0.00508607	Not significant	YES
BCHE	0.008	0.982948	0.00746943	Not significant	NO
BCKDHA	-0.085	0.808876	0.0921181	Not significant	NO
BCKDHB	-0.097	0.737147	0.132446	Not significant	NO
BCKDK	-0.099	0.795076	0.0995914	Not significant	NO
BCL10	0.095	0.84292	0.0742138	Not significant	YES
BCL11B	-0.043	0.896668	0.0473681	Not significant	YES
BCL2	-0.013	0.976713	0.0102329	Not significant	YES
BCL2A1	0.111	0.673315	0.171782	Not significant	YES
BCL2L1	0.028	0.960625	0.0174462	Not significant	NO
BCL2L11	0.02	0.969928	0.0132604	Not significant	NO
BCL2L12	-0.028	0.956341	0.0193872	Not significant	NO
BCL2L13	0.082	0.888046	0.0515646	Not significant	NO
BCL2L14	0.024	0.945167	0.0244912	Not significant	NO
BCL2L2	0.031	0.960985	0.0172832	Not significant	YES
BCL3	0.051	0.90169	0.0449427	Not significant	NO
BCL6	-0.115	0.706116	0.151124	Not significant	NO
BCL6B	0.001	0.998822	0.000511903	Not significant	NO
BCL7A	0.042	0.935087	0.029148	Not significant	YES
BCL7B	-0.112	0.794885	0.0996957	Not significant	NO
BCL7C	-0.031	0.947606	0.0233723	Not significant	NO
BCL9	0.101	0.736866	0.132612	Not significant	NO
BCL9L	0.076	0.836274	0.0776517	Not significant	YES
BCLAF1	0.121	0.789887	0.102435	Not significant	NO
BCO2	-0.233	0.481491	0.317411	Not significant	NO
BCOR	0.042	0.930433	0.031315	Not significant	NO
BCORL1	-0.008	0.988357	0.00508607	Not significant	NO
BCR	0.109	0.78047	0.107644	Not significant	YES
BCS1L	-0.112	0.769303	0.113903	Not significant	NO
BDH2	-0.028	0.949991	0.0222806	Not significant	NO
BDKRB2	0.024	0.946559	0.0238524	Not significant	YES
BDNFOS	-0.063	0.857831	0.0665983	Not significant	NO
BDP1	0.05	0.922075	0.035234	Not significant	YES
BEAN	-0.055	0.845135	0.0730738	Not significant	NO
BECN1	0.233	0.469186	0.328655	Not significant	NO
BEGAIN	-0.019	0.956675	0.0192357	Not significant	NO
BEND3	0.142	0.600335	0.221606	Not significant	NO
BEND5	-0.018	0.960656	0.0174322	Not significant	NO
BEND7	-0.037	0.930719	0.0311813	Not significant	NO
BEST1	-0.105	0.688535	0.162074	Not significant	YES
BEST4	-0.085	0.745615	0.127486	Not significant	NO
BET1	-0.376	0.210413	0.676927	Not significant	NO
BET1L	-0.174	0.664498	0.177507	Not significant	YES
BEX2	-0.063	0.826268	0.0828793	Not significant	NO
BEX4	-0.022	0.956341	0.0193872	Not significant	NO
BEX5	-0.036	0.90857	0.0416414	Not significant	NO
BFAR	0.154	0.724858	0.139747	Not significant	YES
BFSP1	-0.034	0.925691	0.0335338	Not significant	NO
BGLAP	-0.125	0.634025	0.197894	Not significant	NO
BGN	0.042	0.89997	0.0457721	Not significant	NO
BHLHB9	0.049	0.902592	0.0445083	Not significant	YES
BHLHE40	-0.055	0.885809	0.0526599	Not significant	NO
BHLHE41	0.08	0.765944	0.115803	Not significant	YES
BHMT2	-0.078	0.784246	0.105548	Not significant	NO
BICC1	0.067	0.810025	0.0915014	Not significant	NO
BICD1	0.146	0.581023	0.235806	Not significant	YES
BICD2	0.053	0.925691	0.0335338	Not significant	NO
BID	-0.054	0.902592	0.0445083	Not significant	YES
BIK	-0.006	0.989903	0.00440721	Not significant	NO
BIN1	-0.098	0.754426	0.122383	Not significant	NO
BIN2	-0.054	0.875556	0.0577161	Not significant	YES
BIN3	-0.164	0.581023	0.235806	Not significant	YES
BIRC2	-0.004	0.99657	0.00149237	Not significant	NO
BIRC3	0.256	0.422847	0.373816	Not significant	NO
BIRC5	-0.026	0.938825	0.0274154	Not significant	NO
BIRC6	0.038	0.949939	0.0223044	Not significant	NO
BIVM	-0.145	0.629884	0.200739	Not significant	NO
BLCAP	-0.154	0.598169	0.223176	Not significant	NO
BLM	-0.012	0.973938	0.0114687	Not significant	NO
BLMH	0.016	0.970184	0.0131458	Not significant	NO
BLNK	0.091	0.769303	0.113903	Not significant	NO
BLOC1S1	-0.081	0.809176	0.091957	Not significant	NO
BLOC1S2	-0.033	0.963572	0.0161157	Not significant	NO
BLOC1S3	0.051	0.922471	0.0350475	Not significant	NO
BLVRA	-0.011	0.978155	0.00959237	Not significant	NO
BLVRB	-0.071	0.837698	0.0769124	Not significant	NO
BLZF1	0.115	0.749537	0.125207	Not significant	NO
BMF	0.027	0.942323	0.0258	Not significant	NO
BMI1	-0.073	0.884789	0.0531604	Not significant	NO
BMP1	-0.087	0.79484	0.0997204	Not significant	NO
BMP2	0.071	0.798428	0.0977644	Not significant	NO
BMP2K	0.05	0.902592	0.0445083	Not significant	NO
BMP4	-0.07	0.794885	0.0996957	Not significant	YES
BMP8A	0.033	0.922356	0.0351016	Not significant	YES
BMP8B	-0.042	0.894897	0.0482269	Not significant	NO
BMPR1A	0.05	0.918611	0.0368684	Not significant	YES
BMPR2	0.018	0.97374	0.0115568	Not significant	YES
BMS1	0.156	0.720084	0.142617	Not significant	NO
BMS1P4	-0.153	0.56407	0.248667	Not significant	NO
BMS1P5	-0.061	0.883083	0.0539985	Not significant	NO
BMX	-0.013	0.972448	0.0121337	Not significant	NO
BNIP1	-0.018	0.973943	0.0114665	Not significant	NO
BNIP2	-0.093	0.84395	0.0736831	Not significant	NO
BNIP3	-0.216	0.438784	0.35775	Not significant	YES
BNIP3L	-0.12	0.707603	0.150211	Not significant	YES
BOC	-0.235	0.438784	0.35775	Not significant	YES
BOD1	0.066	0.90334	0.0441486	Not significant	YES
BOD1L	0.054	0.902592	0.0445083	Not significant	NO
BOK	-0.419	0.272176	0.565149	Not significant	NO
BOLA1	-0.25	0.382523	0.417342	Not significant	NO
BOLA2	0.027	0.955928	0.0195748	Not significant	NO
BOLA3	-0.054	0.908319	0.0417617	Not significant	NO
BOP1	-0.049	0.882871	0.0541027	Not significant	NO
BPGM	-0.023	0.971224	0.0126804	Not significant	NO
BPHL	-0.145	0.599498	0.222212	Not significant	YES
BPNT1	0.052	0.924427	0.0341272	Not significant	NO
BPTF	0.242	0.400594	0.397295	Not significant	YES
BRAF	0.039	0.941277	0.0262828	Not significant	NO
BRAP	0.133	0.786423	0.104344	Not significant	NO
BRCA1	0.044	0.908319	0.0417617	Not significant	NO
BRCA2	0.016	0.969928	0.0132604	Not significant	NO
BRCC3	0.117	0.757243	0.120765	Not significant	YES
BRD1	0.136	0.702786	0.153177	Not significant	NO
BRD2	-0.022	0.972819	0.0119681	Not significant	NO
BRD3	0.052	0.90857	0.0416414	Not significant	NO
BRD4	0.072	0.89006	0.0505808	Not significant	NO
BRD7	-0.247	0.410345	0.38685	Not significant	NO
BRD8	0.087	0.861864	0.0645615	Not significant	NO
BRD9	0.013	0.985473	0.0063553	Not significant	NO
BRE	0.036	0.955547	0.0197479	Not significant	NO
BRF1	-0.112	0.80049	0.0966443	Not significant	NO
BRF2	-0.006	0.992569	0.00323918	Not significant	NO
BRI3	-0.117	0.694584	0.158275	Not significant	NO
BRI3BP	0.14	0.635494	0.196889	Not significant	YES
BRIP1	0.007	0.988357	0.00508607	Not significant	NO
BRIX1	-0.001	0.99947	0.000230343	Not significant	NO
BRMS1	-0.062	0.892733	0.0492786	Not significant	NO
BRMS1L	-0.002	0.998221	0.000773334	Not significant	YES
BRP44	-0.03	0.958033	0.0186195	Not significant	NO
BRP44L	-0.764	0.147753	0.830465	Not significant	NO
BRPF1	0.026	0.971019	0.0127725	Not significant	YES
BRPF3	-0.044	0.922075	0.035234	Not significant	YES
BRSK1	0.038	0.910771	0.040591	Not significant	NO
BRWD1	-0.125	0.730897	0.136144	Not significant	YES
BRWD3	0.245	0.398669	0.399388	Not significant	YES
BSCL2	-0.065	0.884789	0.0531604	Not significant	NO
BSDC1	-0.235	0.427289	0.369279	Not significant	NO
BSG	-0.055	0.898575	0.0464457	Not significant	NO
BSN	-0.756	0.209333	0.679163	Not significant	YES
BSPRY	-0.011	0.976094	0.0105084	Not significant	NO
BST1	-0.031	0.924427	0.0341272	Not significant	YES
BST2	-0.525	0.260299	0.584528	Not significant	NO
BTAF1	-0.054	0.898575	0.0464457	Not significant	NO
BTBD1	0.039	0.95417	0.0203744	Not significant	YES
BTBD10	0.068	0.90827	0.0417849	Not significant	NO
BTBD11	-0.051	0.87078	0.0600914	Not significant	NO
BTBD12	0.493	0.160354	0.79492	Not significant	NO
BTBD16	-0.124	0.64014	0.193725	Not significant	NO
BTBD19	-0.047	0.890929	0.0501568	Not significant	YES
BTBD2	-0.066	0.895906	0.0477377	Not significant	YES
BTBD3	0.077	0.833052	0.0793279	Not significant	NO
BTBD6	-0.09	0.789785	0.102491	Not significant	NO
BTBD7	0.151	0.660836	0.179906	Not significant	YES
BTBD9	0.024	0.96982	0.0133086	Not significant	YES
BTD	-0.103	0.725108	0.139597	Not significant	YES
BTF3	0.075	0.882871	0.0541027	Not significant	NO
BTF3L4	0.091	0.855573	0.067743	Not significant	NO
BTG1	0.072	0.849813	0.0706764	Not significant	NO
BTG2	-0.054	0.87751	0.0567479	Not significant	NO
BTG3	-0.075	0.859308	0.0658513	Not significant	NO
BTK	0.01	0.978799	0.00930646	Not significant	NO
BTN2A1	-0.058	0.909347	0.0412703	Not significant	NO
BTN2A2	-0.001	0.998822	0.000511903	Not significant	NO
BTN2A3	0.019	0.97039	0.0130539	Not significant	NO
BTN3A1	-0.041	0.921734	0.0353943	Not significant	NO
BTN3A2	-0.046	0.914148	0.0389835	Not significant	YES
BTN3A3	0.017	0.971019	0.0127725	Not significant	NO
BTNL9	-0.273	0.398669	0.399388	Not significant	NO
BTRC	-0.023	0.972819	0.0119681	Not significant	NO
BUB1	-0.002	0.998176	0.000792795	Not significant	YES
BUB1B	0.025	0.946559	0.0238524	Not significant	NO
BUB3	-0.137	0.749168	0.125421	Not significant	NO
BUD13	-0.175	0.655696	0.183298	Not significant	NO
BUD31	-0.142	0.622382	0.205943	Not significant	NO
BVES	0.054	0.867858	0.0615512	Not significant	YES
BYSL	-0.037	0.946559	0.0238524	Not significant	NO
BZW1	-0.137	0.722269	0.141301	Not significant	NO
BZW2	0.071	0.87078	0.0600914	Not significant	NO
C10orf10	-0.067	0.820972	0.0856714	Not significant	NO
C10orf105	-0.176	0.52487	0.279948	Not significant	YES
C10orf108	-0.022	0.953907	0.0204939	Not significant	NO
C10orf11	-0.207	0.454964	0.342023	Not significant	NO
C10orf110	-0.075	0.787856	0.103553	Not significant	NO
C10orf111	-0.036	0.924427	0.0341272	Not significant	NO
C10orf114	-0.119	0.650395	0.186823	Not significant	NO
C10orf118	0.075	0.812356	0.0902536	Not significant	YES
C10orf119	-0.076	0.894156	0.0485865	Not significant	NO
C10orf12	0.055	0.902592	0.0445083	Not significant	NO
C10orf125	-0.923	0.141	0.850781	Not significant	NO
C10orf137	-0.029	0.964361	0.0157602	Not significant	NO
C10orf140	-0.078	0.787744	0.103615	Not significant	NO
C10orf18	0.051	0.922241	0.0351558	Not significant	NO
C10orf2	0.113	0.726225	0.138929	Not significant	NO
C10orf25	-0.209	0.459537	0.337679	Not significant	YES
C10orf26	-0.082	0.879753	0.0556393	Not significant	NO
C10orf28	0.209	0.522699	0.281748	Not significant	NO
C10orf32	-0.235	0.408154	0.389176	Not significant	NO
C10orf35	-1.413	0.125029	0.90299	Not significant	NO
C10orf4	-0.073	0.885173	0.0529716	Not significant	NO
C10orf41	-0.091	0.767111	0.115142	Not significant	NO
C10orf46	0.022	0.974752	0.0111061	Not significant	NO
C10orf54	-0.16	0.558142	0.253256	Not significant	NO
C10orf57	-0.125	0.715195	0.145576	Not significant	NO
C10orf58	-0.19	0.489852	0.309935	Not significant	NO
C10orf72	-0.067	0.808876	0.0921181	Not significant	NO
C10orf75	-0.069	0.80663	0.0933258	Not significant	NO
C10orf76	-0.086	0.885809	0.0526599	Not significant	NO
C10orf78	0.031	0.958699	0.0183176	Not significant	NO
C10orf79	0.033	0.920894	0.0357902	Not significant	NO
C10orf84	-0.002	0.998822	0.000511903	Not significant	NO
C10orf88	0.07	0.902592	0.0445083	Not significant	NO
C10orf95	-0.045	0.894897	0.0482269	Not significant	NO
C11orf1	0.029	0.952242	0.0212527	Not significant	NO
C11orf10	-0.11	0.756782	0.121029	Not significant	NO
C11orf17	-0.03	0.96461	0.0156482	Not significant	NO
C11orf2	-0.112	0.772453	0.112128	Not significant	NO
C11orf21	-0.597	0.288302	0.540152	Not significant	NO
C11orf24	-0.081	0.82787	0.0820377	Not significant	NO
C11orf30	0.03	0.958565	0.0183783	Not significant	NO
C11orf31	-0.173	0.552347	0.257788	Not significant	NO
C11orf35	-0.249	0.386793	0.412522	Not significant	NO
C11orf45	0.038	0.908319	0.0417617	Not significant	NO
C11orf46	0.032	0.967357	0.0144134	Not significant	NO
C11orf48	-0.055	0.899076	0.0462037	Not significant	NO
C11orf49	0.024	0.958449	0.018431	Not significant	NO
C11orf51	-0.092	0.793813	0.100282	Not significant	NO
C11orf52	-0.032	0.941996	0.0259511	Not significant	NO
C11orf54	-0.039	0.924879	0.033915	Not significant	YES
C11orf57	0.086	0.885809	0.0526599	Not significant	NO
C11orf58	-0.092	0.873587	0.0586939	Not significant	NO
C11orf59	-0.058	0.917614	0.03734	Not significant	NO
C11orf61	0.019	0.973445	0.0116886	Not significant	NO
C11orf63	0.01	0.978155	0.00959237	Not significant	NO
C11orf65	-0.095	0.717914	0.143928	Not significant	NO
C11orf66	-0.187	0.499282	0.301654	Not significant	NO
C11orf67	-0.158	0.554957	0.25574	Not significant	NO
C11orf68	-0.123	0.756929	0.120945	Not significant	NO
C11orf71	-0.431	0.223703	0.650328	Not significant	NO
C11orf73	-0.041	0.943476	0.0252691	Not significant	NO
C11orf74	0.041	0.935087	0.029148	Not significant	NO
C11orf75	-0.226	0.419715	0.377045	Not significant	NO
C11orf80	0.05	0.890651	0.0502926	Not significant	NO
C11orf82	0.003	0.995587	0.00192083	Not significant	NO
C11orf83	-0.064	0.860661	0.0651679	Not significant	YES
C11orf84	-0.014	0.976229	0.0104485	Not significant	NO
C11orf9	0.043	0.90334	0.0441486	Not significant	NO
C11orf92	0.077	0.770396	0.113286	Not significant	NO
C11orf93	0.028	0.931957	0.0306041	Not significant	NO
C11orf95	-0.077	0.851337	0.0698983	Not significant	NO
C12orf10	0.087	0.857097	0.06697	Not significant	NO
C12orf11	0.124	0.737351	0.132326	Not significant	NO
C12orf23	-0.013	0.986748	0.00579386	Not significant	NO
C12orf24	-0.242	0.40308	0.394609	Not significant	NO
C12orf26	-0.02	0.97374	0.0115568	Not significant	NO
C12orf27	0.029	0.937493	0.028032	Not significant	NO
C12orf29	-0.085	0.881484	0.0547855	Not significant	NO
C12orf32	0.122	0.720084	0.142617	Not significant	NO
C12orf34	0.035	0.925691	0.0335338	Not significant	NO
C12orf35	-0.079	0.810025	0.0915014	Not significant	NO
C12orf4	0.12	0.786928	0.104065	Not significant	NO
C12orf41	0.004	0.996281	0.00161816	Not significant	NO
C12orf43	0.138	0.753356	0.123	Not significant	NO
C12orf44	-0.039	0.946559	0.0238524	Not significant	NO
C12orf45	0.154	0.598361	0.223037	Not significant	NO
C12orf47	-0.03	0.956675	0.0192357	Not significant	NO
C12orf48	-0.075	0.795223	0.099511	Not significant	NO
C12orf49	0.173	0.521889	0.282422	Not significant	NO
C12orf5	0.014	0.977756	0.00976939	Not significant	NO
C12orf51	-0.015	0.978155	0.00959237	Not significant	NO
C12orf52	-0.062	0.898676	0.0463969	Not significant	NO
C12orf57	-0.023	0.963768	0.0160273	Not significant	NO
C12orf60	-0.057	0.89245	0.0494163	Not significant	YES
C12orf61	-0.142	0.598793	0.222723	Not significant	NO
C12orf62	-0.096	0.782202	0.106681	Not significant	NO
C12orf65	-0.048	0.936807	0.0283498	Not significant	NO
C12orf66	0.016	0.977756	0.00976939	Not significant	NO
C12orf68	0.048	0.892733	0.0492786	Not significant	NO
C12orf69	-0.201	0.495923	0.304586	Not significant	NO
C12orf72	-0.109	0.721441	0.141799	Not significant	NO
C12orf73	-0.042	0.935087	0.029148	Not significant	NO
C12orf75	0.011	0.974818	0.0110763	Not significant	NO
C12orf76	-0.316	0.297547	0.526444	Not significant	NO
C13orf1	-0.103	0.765944	0.115803	Not significant	NO
C13orf15	-0.063	0.865424	0.062771	Not significant	NO
C13orf18	-0.003	0.995587	0.00192083	Not significant	NO
C13orf23	0.187	0.521889	0.282422	Not significant	NO
C13orf27	-0.579	0.166684	0.778106	Not significant	NO
C13orf29	0.005	0.990013	0.00435898	Not significant	NO
C13orf31	0.012	0.980751	0.00844146	Not significant	NO
C13orf33	0.026	0.936807	0.0283498	Not significant	NO
C13orf34	-0.017	0.97269	0.0120256	Not significant	NO
C13orf37	0.005	0.99412	0.00256128	Not significant	NO
C14orf1	-0.106	0.730897	0.136144	Not significant	NO
C14orf101	-0.006	0.992569	0.00323918	Not significant	NO
C14orf102	-0.023	0.969108	0.0136279	Not significant	NO
C14orf104	-0.043	0.939124	0.0272769	Not significant	NO
C14orf105	0.024	0.95219	0.0212765	Not significant	NO
C14orf106	0.004	0.995007	0.00217392	Not significant	NO
C14orf109	-0.132	0.707603	0.150211	Not significant	NO
C14orf118	0.054	0.90827	0.0417849	Not significant	NO
C14orf119	-0.025	0.971065	0.0127519	Not significant	NO
C14orf126	-0.186	0.576091	0.239509	Not significant	NO
C14orf128	0.003	0.99657	0.00149237	Not significant	NO
C14orf129	0.074	0.851642	0.0697428	Not significant	NO
C14orf132	0.021	0.955928	0.0195748	Not significant	NO
C14orf135	-0.037	0.938394	0.0276148	Not significant	NO
C14orf138	-0.105	0.798181	0.0978986	Not significant	NO
C14orf139	-0.142	0.597108	0.223947	Not significant	NO
C14orf142	-0.244	0.404594	0.392981	Not significant	NO
C14orf143	-0.054	0.90857	0.0416414	Not significant	NO
C14orf145	-0.017	0.96982	0.0133086	Not significant	NO
C14orf147	-0.071	0.83792	0.0767973	Not significant	NO
C14orf148	-0.062	0.83171	0.0800282	Not significant	NO
C14orf149	0.06	0.882043	0.05451	Not significant	NO
C14orf153	-0.076	0.862044	0.0644707	Not significant	NO
C14orf156	-0.075	0.831401	0.0801895	Not significant	NO
C14orf159	-0.044	0.920564	0.0359462	Not significant	NO
C14orf166	-0.007	0.992569	0.00323918	Not significant	NO
C14orf167	-0.04	0.922224	0.0351635	Not significant	NO
C14orf169	0.098	0.839984	0.0757288	Not significant	NO
C14orf176	-0.115	0.668895	0.174642	Not significant	NO
C14orf179	-0.037	0.93929	0.0272002	Not significant	NO
C14orf181	-0.164	0.542085	0.265932	Not significant	NO
C14orf182	-0.012	0.973943	0.0114665	Not significant	YES
C14orf2	-0.073	0.844905	0.0731919	Not significant	NO
C14orf21	0.002	0.998568	0.000622341	Not significant	NO
C14orf28	-0.096	0.795076	0.0995914	Not significant	NO
C14orf33	0.11	0.725108	0.139597	Not significant	NO
C14orf37	-0.005	0.991231	0.0038251	Not significant	YES
C14orf4	-0.112	0.739475	0.131077	Not significant	NO
C14orf43	0.078	0.843496	0.0739171	Not significant	NO
C14orf45	0.034	0.941996	0.0259511	Not significant	NO
C14orf49	-0.339	0.329116	0.48265	Not significant	NO
C14orf68	-3.415	0.0562588	1.24981	Not significant	NO
C14orf73	-0.157	0.562351	0.249992	Not significant	NO
C14orf79	0.024	0.96461	0.0156482	Not significant	YES
C14orf80	-0.05	0.892606	0.0493404	Not significant	NO
C14orf93	0.01	0.989903	0.00440721	Not significant	NO
C15orf17	-0.146	0.694174	0.158531	Not significant	NO
C15orf21	-0.115	0.685849	0.163772	Not significant	NO
C15orf23	-0.08	0.844783	0.073255	Not significant	NO
C15orf24	-0.234	0.429368	0.36717	Not significant	NO
C15orf27	-0.072	0.789195	0.102815	Not significant	NO
C15orf29	-0.045	0.949939	0.0223044	Not significant	NO
C15orf33	-0.091	0.728522	0.137557	Not significant	NO
C15orf34	-0.032	0.930719	0.0311813	Not significant	NO
C15orf37	-0.053	0.897716	0.0468609	Not significant	NO
C15orf38	-0.049	0.917898	0.0372054	Not significant	NO
C15orf39	0.055	0.897716	0.0468609	Not significant	NO
C15orf40	-0.03	0.96167	0.016974	Not significant	NO
C15orf41	0.067	0.878309	0.0563528	Not significant	YES
C15orf42	-0.019	0.961802	0.0169142	Not significant	NO
C15orf44	-0.09	0.887827	0.0516714	Not significant	NO
C15orf48	-0.125	0.659032	0.181093	Not significant	NO
C15orf52	0.056	0.851642	0.0697428	Not significant	NO
C15orf57	0.078	0.89006	0.0505808	Not significant	YES
C15orf58	-0.04	0.947233	0.0235431	Not significant	NO
C15orf59	-0.072	0.792298	0.101112	Not significant	NO
C15orf61	-0.118	0.725108	0.139597	Not significant	NO
C15orf62	-0.165	0.537547	0.269584	Not significant	NO
C15orf63	-0.109	0.729606	0.136912	Not significant	NO
C16orf13	-0.105	0.724864	0.139744	Not significant	NO
C16orf42	-0.044	0.924427	0.0341272	Not significant	NO
C16orf45	-0.139	0.598793	0.222723	Not significant	NO
C16orf46	-0.024	0.956453	0.0193364	Not significant	NO
C16orf48	-0.014	0.977756	0.00976939	Not significant	NO
C16orf5	-0.19	0.504569	0.297079	Not significant	NO
C16orf52	-0.074	0.865506	0.0627297	Not significant	NO
C16orf53	-0.035	0.955928	0.0195748	Not significant	NO
C16orf54	-0.069	0.80552	0.0939236	Not significant	NO
C16orf55	0.001	0.99884	0.000503953	Not significant	NO
C16orf57	-0.084	0.872912	0.0590293	Not significant	NO
C16orf58	-0.141	0.6841	0.16488	Not significant	NO
C16orf59	0.007	0.989903	0.00440721	Not significant	NO
C16orf61	-0.138	0.685164	0.164206	Not significant	NO
C16orf62	0.097	0.746517	0.126961	Not significant	NO
C16orf63	0.155	0.688808	0.161902	Not significant	NO
C16orf68	0.132	0.715195	0.145576	Not significant	NO
C16orf7	-0.115	0.730477	0.136394	Not significant	NO
C16orf70	-0.112	0.732074	0.135445	Not significant	NO
C16orf71	0.009	0.98659	0.00586318	Not significant	NO
C16orf72	0.071	0.902592	0.0445083	Not significant	NO
C16orf75	-0.008	0.987578	0.00542853	Not significant	NO
C16orf79	-0.071	0.800033	0.0968919	Not significant	NO
C16orf80	-0.307	0.293101	0.532983	Not significant	NO
C16orf86	-0.752	0.166684	0.778106	Not significant	NO
C16orf87	-0.17	0.54987	0.25974	Not significant	NO
C16orf88	0.469	0.148246	0.829018	Not significant	NO
C16orf91	0.009	0.989903	0.00440721	Not significant	NO
C16orf93	0.027	0.946726	0.0237758	Not significant	NO
C17orf100	-0.439	0.2452	0.61048	Not significant	NO
C17orf101	0	0.99947	0.000230343	Not significant	NO
C17orf103	-0.03	0.955928	0.0195748	Not significant	YES
C17orf104	0.047	0.902592	0.0445083	Not significant	NO
C17orf106	-0.03	0.952722	0.0210339	Not significant	NO
C17orf107	-0.096	0.736124	0.133049	Not significant	NO
C17orf108	-0.034	0.946559	0.0238524	Not significant	NO
C17orf28	0.029	0.930004	0.0315153	Not significant	NO
C17orf37	-0.038	0.943476	0.0252691	Not significant	NO
C17orf39	-0.095	0.804198	0.0946371	Not significant	NO
C17orf42	0.066	0.90827	0.0417849	Not significant	NO
C17orf44	-0.223	0.425062	0.371548	Not significant	NO
C17orf48	-0.031	0.952458	0.021154	Not significant	NO
C17orf49	-0.104	0.744223	0.128297	Not significant	NO
C17orf51	0.075	0.793637	0.100378	Not significant	YES
C17orf53	0.032	0.931957	0.0306041	Not significant	NO
C17orf55	-0.088	0.739475	0.131077	Not significant	NO
C17orf56	-0.061	0.908319	0.0417617	Not significant	NO
C17orf57	-0.039	0.908319	0.0417617	Not significant	NO
C17orf58	-0.112	0.73348	0.134612	Not significant	NO
C17orf59	-0.136	0.659365	0.180874	Not significant	NO
C17orf60	0.081	0.765944	0.115803	Not significant	NO
C17orf61	-0.191	0.483305	0.315779	Not significant	NO
C17orf62	0.063	0.898845	0.0463153	Not significant	YES
C17orf63	0.244	0.404594	0.392981	Not significant	NO
C17orf65	0.085	0.836419	0.0775762	Not significant	NO
C17orf67	0.191	0.492869	0.307268	Not significant	NO
C17orf68	-0.083	0.847621	0.0717985	Not significant	NO
C17orf69	0.045	0.895906	0.0477377	Not significant	NO
C17orf70	-0.054	0.922224	0.0351635	Not significant	NO
C17orf71	0.176	0.598169	0.223176	Not significant	NO
C17orf75	0.007	0.992569	0.00323918	Not significant	NO
C17orf76	-0.095	0.720084	0.142617	Not significant	NO
C17orf79	-0.005	0.993505	0.0028299	Not significant	NO
C17orf80	0.093	0.847621	0.0717985	Not significant	NO
C17orf81	-0.262	0.359975	0.443728	Not significant	NO
C17orf82	-0.023	0.953785	0.0205494	Not significant	NO
C17orf85	-0.094	0.836519	0.0775243	Not significant	YES
C17orf86	-0.008	0.989903	0.00440721	Not significant	NO
C17orf87	-0.043	0.898845	0.0463153	Not significant	NO
C17orf89	-0.034	0.928108	0.0324017	Not significant	NO
C17orf90	-0.048	0.908319	0.0417617	Not significant	NO
C17orf91	-0.114	0.692422	0.159629	Not significant	NO
C17orf95	-0.079	0.86048	0.0652593	Not significant	NO
C17orf96	0.26	0.416371	0.380519	Not significant	NO
C17orf97	0.039	0.913288	0.0393925	Not significant	NO
C18orf1	-0.072	0.828808	0.0815458	Not significant	NO
C18orf10	-0.012	0.982569	0.00763706	Not significant	NO
C18orf18	-0.199	0.470583	0.327364	Not significant	NO
C18orf19	-0.58	0.096061	1.01745	Not significant	NO
C18orf21	0.046	0.934681	0.0293366	Not significant	NO
C18orf22	-0.076	0.859663	0.0656716	Not significant	NO
C18orf25	-0.032	0.964361	0.0157602	Not significant	NO
C18orf32	-0.256	0.374055	0.427065	Not significant	YES
C18orf45	0.023	0.966935	0.0146028	Not significant	NO
C18orf54	-0.009	0.983195	0.00736054	Not significant	NO
C18orf55	-0.103	0.827179	0.0824007	Not significant	NO
C18orf56	-0.098	0.712169	0.147417	Not significant	NO
C18orf8	-0.271	0.35447	0.45042	Not significant	NO
C19orf10	-0.288	0.32375	0.48979	Not significant	NO
C19orf12	0.009	0.989903	0.00440721	Not significant	YES
C19orf18	-0.17	0.574902	0.240406	Not significant	NO
C19orf2	0.027	0.97039	0.0130539	Not significant	NO
C19orf20	-0.057	0.884175	0.0534617	Not significant	NO
C19orf22	0	0.99947	0.000230343	Not significant	NO
C19orf23	-0.105	0.708658	0.149563	Not significant	NO
C19orf24	-0.082	0.791588	0.101501	Not significant	NO
C19orf25	-0.042	0.924427	0.0341272	Not significant	NO
C19orf28	-0.083	0.808886	0.0921129	Not significant	NO
C19orf29	-0.106	0.82787	0.0820377	Not significant	NO
C19orf35	0.038	0.916043	0.038084	Not significant	NO
C19orf36	-1.19	0.15898	0.798657	Not significant	NO
C19orf38	-0.119	0.650395	0.186823	Not significant	NO
C19orf39	0.008	0.990013	0.00435898	Not significant	NO
C19orf40	0.082	0.814595	0.0890582	Not significant	YES
C19orf42	0.005	0.995587	0.00192083	Not significant	NO
C19orf43	-0.024	0.964774	0.0155745	Not significant	NO
C19orf44	0.127	0.712169	0.147417	Not significant	NO
C19orf46	0.036	0.914168	0.038974	Not significant	NO
C19orf47	0.026	0.967025	0.0145624	Not significant	NO
C19orf48	0.039	0.920564	0.0359462	Not significant	NO
C19orf50	0.054	0.924427	0.0341272	Not significant	NO
C19orf51	0.056	0.845135	0.0730738	Not significant	NO
C19orf52	0.061	0.917898	0.0372054	Not significant	NO
C19orf53	-0.008	0.989903	0.00440721	Not significant	NO
C19orf54	0.069	0.885173	0.0529716	Not significant	YES
C19orf55	0.127	0.650408	0.186814	Not significant	NO
C19orf56	-0.021	0.971019	0.0127725	Not significant	NO
C19orf57	-0.039	0.91089	0.0405341	Not significant	NO
C19orf6	-0.252	0.400594	0.397295	Not significant	NO
C19orf60	-0.088	0.77382	0.11136	Not significant	NO
C19orf61	0.096	0.780418	0.107673	Not significant	NO
C19orf62	-0.027	0.966216	0.0149257	Not significant	NO
C19orf63	-0.005	0.994776	0.00227458	Not significant	NO
C19orf66	-0.101	0.757243	0.120765	Not significant	NO
C19orf70	-0.126	0.667975	0.17524	Not significant	NO
C19orf71	-0.016	0.97039	0.0130539	Not significant	NO
C19orf73	-0.101	0.712372	0.147293	Not significant	YES
C19orf76	0.074	0.798181	0.0978986	Not significant	NO
C19orf77	-0.022	0.95417	0.0203744	Not significant	NO
C1D	-0.05	0.931379	0.0308737	Not significant	NO
C1GALT1	0.038	0.936807	0.0283498	Not significant	NO
C1GALT1C1	-0.159	0.621394	0.206633	Not significant	NO
C1orf101	-0.09	0.73348	0.134612	Not significant	NO
C1orf103	-0.044	0.923234	0.0346881	Not significant	NO
C1orf104	-0.025	0.955928	0.0195748	Not significant	NO
C1orf105	-0.088	0.737351	0.132326	Not significant	NO
C1orf106	0.051	0.867337	0.0618121	Not significant	NO
C1orf107	0.044	0.931829	0.0306638	Not significant	NO
C1orf109	0.106	0.785657	0.104767	Not significant	NO
C1orf112	-0.03	0.942323	0.0258	Not significant	NO
C1orf113	-0.078	0.778788	0.108581	Not significant	NO
C1orf115	-0.138	0.638283	0.194987	Not significant	YES
C1orf116	0.336	0.410345	0.38685	Not significant	NO
C1orf122	-0.086	0.791588	0.101501	Not significant	NO
C1orf123	0.022	0.971614	0.0125063	Not significant	NO
C1orf124	0.132	0.732074	0.135445	Not significant	NO
C1orf130	-0.088	0.736866	0.132612	Not significant	NO
C1orf131	0.045	0.925691	0.0335338	Not significant	NO
C1orf135	-0.017	0.968844	0.013746	Not significant	NO
C1orf144	-0.136	0.736866	0.132612	Not significant	NO
C1orf151	-0.177	0.531753	0.27429	Not significant	NO
C1orf152	-0.013	0.97374	0.0115568	Not significant	NO
C1orf156	-0.01	0.989538	0.0045676	Not significant	NO
C1orf159	0.035	0.950735	0.0219407	Not significant	NO
C1orf161	-0.04	0.901103	0.0452257	Not significant	NO
C1orf162	-0.059	0.85377	0.0686589	Not significant	NO
C1orf163	0.181	0.545242	0.26341	Not significant	NO
C1orf168	0.006	0.989903	0.00440721	Not significant	NO
C1orf170	0.013	0.971614	0.0125063	Not significant	NO
C1orf172	-0.006	0.989903	0.00440721	Not significant	NO
C1orf174	0.104	0.816341	0.0881286	Not significant	NO
C1orf175	-0.212	0.50724	0.294787	Not significant	NO
C1orf177	-0.057	0.839301	0.0760822	Not significant	NO
C1orf182	0.017	0.966935	0.0146028	Not significant	NO
C1orf183	0.038	0.922075	0.035234	Not significant	NO
C1orf190	-0.014	0.971019	0.0127725	Not significant	NO
C1orf192	0.031	0.930004	0.0315153	Not significant	NO
C1orf198	0.092	0.77233	0.112197	Not significant	NO
C1orf201	-0.083	0.804198	0.0946371	Not significant	NO
C1orf203	-0.101	0.75024	0.1248	Not significant	NO
C1orf204	-0.479	0.33393	0.476345	Not significant	NO
C1orf21	-0.134	0.604168	0.218842	Not significant	YES
C1orf210	0	0.99947	0.000230343	Not significant	NO
C1orf212	-0.09	0.823389	0.0843951	Not significant	NO
C1orf213	-0.123	0.664127	0.177749	Not significant	NO
C1orf216	0.122	0.708226	0.149828	Not significant	NO
C1orf220	-0.03	0.934221	0.0295503	Not significant	YES
C1orf226	-0.055	0.882043	0.05451	Not significant	YES
C1orf228	-0.552	0.288302	0.540152	Not significant	NO
C1orf229	-0.046	0.888557	0.0513145	Not significant	NO
C1orf25	-0.064	0.902592	0.0445083	Not significant	NO
C1orf26	-0.058	0.908319	0.0417617	Not significant	NO
C1orf27	-0.098	0.799579	0.0971388	Not significant	NO
C1orf31	-0.032	0.949939	0.0223044	Not significant	NO
C1orf35	-0.036	0.945085	0.024529	Not significant	YES
C1orf38	-0.059	0.855573	0.067743	Not significant	NO
C1orf43	0.022	0.97374	0.0115568	Not significant	YES
C1orf50	-0.038	0.939175	0.0272534	Not significant	NO
C1orf51	0.022	0.955928	0.0195748	Not significant	NO
C1orf52	-0.05	0.933669	0.0298069	Not significant	NO
C1orf53	-0.089	0.765011	0.116333	Not significant	NO
C1orf54	-0.055	0.881237	0.0549074	Not significant	NO
C1orf55	0.035	0.949939	0.0223044	Not significant	NO
C1orf56	-0.177	0.519018	0.284818	Not significant	YES
C1orf57	0.017	0.973847	0.0115094	Not significant	NO
C1orf58	0.098	0.729458	0.136999	Not significant	NO
C1orf59	-0.081	0.76457	0.116583	Not significant	NO
C1orf63	-0.979	0.0856046	1.0675	Not significant	YES
C1orf66	-0.119	0.74513	0.127768	Not significant	NO
C1orf69	0.017	0.975077	0.010961	Not significant	NO
C1orf70	-0.037	0.908319	0.0417617	Not significant	NO
C1orf74	0.076	0.845606	0.0728318	Not significant	NO
C1orf77	0.065	0.917614	0.03734	Not significant	NO
C1orf83	0.419	0.197132	0.705242	Not significant	NO
C1orf84	0.01	0.982948	0.00746943	Not significant	NO
C1orf85	-0.07	0.866605	0.0621786	Not significant	NO
C1orf86	-0.01	0.987018	0.00567506	Not significant	NO
C1orf89	-0.089	0.765944	0.115803	Not significant	NO
C1orf9	0.049	0.918611	0.0368684	Not significant	NO
C1orf91	-0.113	0.738991	0.131361	Not significant	NO
C1orf93	0.019	0.969928	0.0132604	Not significant	NO
C1orf96	-0.051	0.902592	0.0445083	Not significant	NO
C1orf97	-0.318	0.30476	0.516042	Not significant	NO
C1QA	-0.061	0.838737	0.0763741	Not significant	NO
C1QB	-0.039	0.908319	0.0417617	Not significant	NO
C1QBP	-0.029	0.958699	0.0183176	Not significant	NO
C1QC	-0.033	0.924427	0.0341272	Not significant	NO
C1QL1	-0.111	0.694584	0.158275	Not significant	NO
C1QL3	-0.051	0.869765	0.0605983	Not significant	NO
C1QTNF2	0.033	0.918611	0.0368684	Not significant	YES
C1QTNF3	-0.238	0.494551	0.305789	Not significant	NO
C1QTNF6	0.008	0.989903	0.00440721	Not significant	NO
C1QTNF7	0.029	0.924879	0.033915	Not significant	NO
C1R	-0.091	0.74513	0.127768	Not significant	NO
C1RL	-0.088	0.786441	0.104334	Not significant	NO
C1S	-0.046	0.902592	0.0445083	Not significant	NO
C2	-0.133	0.624113	0.204737	Not significant	NO
C20orf108	-0.284	0.328265	0.483775	Not significant	NO
C20orf11	-0.046	0.941006	0.0264076	Not significant	NO
C20orf111	-0.147	0.692489	0.159587	Not significant	NO
C20orf112	0.175	0.535167	0.271511	Not significant	YES
C20orf117	0.003	0.995676	0.00188186	Not significant	NO
C20orf118	0.129	0.622382	0.205943	Not significant	NO
C20orf12	0.033	0.936759	0.0283721	Not significant	NO
C20orf132	-0.465	0.275073	0.560552	Not significant	NO
C20orf134	0.04	0.90334	0.0441486	Not significant	NO
C20orf135	-0.152	0.58565	0.232362	Not significant	NO
C20orf152	-0.002	0.998176	0.000792795	Not significant	NO
C20orf160	-0.052	0.898575	0.0464457	Not significant	NO
C20orf165	-0.065	0.836274	0.0776517	Not significant	NO
C20orf177	0.021	0.958565	0.0183783	Not significant	NO
C20orf194	-0.007	0.990013	0.00435898	Not significant	NO
C20orf196	-0.045	0.914565	0.0387853	Not significant	YES
C20orf199	0.049	0.895963	0.0477101	Not significant	NO
C20orf20	0.087	0.837963	0.0767751	Not significant	NO
C20orf202	-0.015	0.971019	0.0127725	Not significant	YES
C20orf24	-0.048	0.917898	0.0372054	Not significant	NO
C20orf27	-0.023	0.964774	0.0155745	Not significant	NO
C20orf29	-0.071	0.894897	0.0482269	Not significant	NO
C20orf3	-0.248	0.386015	0.413396	Not significant	NO
C20orf30	-0.148	0.694584	0.158275	Not significant	NO
C20orf4	-0.011	0.990013	0.00435898	Not significant	NO
C20orf43	-0.007	0.992756	0.00315746	Not significant	NO
C20orf46	-0.067	0.80663	0.0933258	Not significant	NO
C20orf54	0.096	0.720084	0.142617	Not significant	NO
C20orf56	-0.171	0.519018	0.284818	Not significant	NO
C20orf7	-0.068	0.895963	0.0477101	Not significant	NO
C20orf72	0.026	0.97039	0.0130539	Not significant	NO
C20orf94	0.07	0.821021	0.085646	Not significant	NO
C20orf96	0.005	0.992967	0.00306502	Not significant	NO
C21orf119	-0.071	0.838802	0.0763404	Not significant	NO
C21orf122	-0.038	0.924427	0.0341272	Not significant	NO
C21orf125	-0.029	0.924427	0.0341272	Not significant	NO
C21orf2	-0.163	0.560155	0.251692	Not significant	NO
C21orf29	-0.029	0.925531	0.0336092	Not significant	NO
C21orf33	-0.205	0.467581	0.330144	Not significant	NO
C21orf34	-0.116	0.661626	0.179388	Not significant	NO
C21orf45	-0.015	0.978155	0.00959237	Not significant	NO
C21orf49	0.04	0.917614	0.03734	Not significant	YES
C21orf56	-0.028	0.933825	0.0297343	Not significant	NO
C21orf57	-0.026	0.956341	0.0193872	Not significant	NO
C21orf58	-0.102	0.714369	0.146077	Not significant	YES
C21orf59	-0.011	0.989903	0.00440721	Not significant	NO
C21orf63	0.004	0.992569	0.00323918	Not significant	NO
C21orf67	-0.146	0.599498	0.222212	Not significant	NO
C21orf7	0.044	0.916653	0.0377951	Not significant	NO
C21orf70	-0.061	0.882871	0.0541027	Not significant	NO
C21orf82	0.014	0.972448	0.0121337	Not significant	NO
C21orf91	-0.06	0.886706	0.0522201	Not significant	NO
C22orf13	-0.065	0.89291	0.0491924	Not significant	NO
C22orf15	-0.258	0.476013	0.322381	Not significant	NO
C22orf23	0.017	0.973445	0.0116886	Not significant	NO
C22orf25	-0.068	0.870493	0.0602347	Not significant	NO
C22orf26	0.083	0.775685	0.110315	Not significant	NO
C22orf27	-0.027	0.963875	0.0159794	Not significant	NO
C22orf28	0.467	0.147705	0.830605	Not significant	NO
C22orf29	0.164	0.602222	0.220243	Not significant	NO
C22orf30	0.187	0.563373	0.249204	Not significant	NO
C22orf32	-0.106	0.752672	0.123394	Not significant	NO
C22orf36	-0.119	0.667975	0.17524	Not significant	NO
C22orf39	0.055	0.921734	0.0353943	Not significant	YES
C22orf40	-0.04	0.934629	0.0293608	Not significant	NO
C22orf41	-0.539	0.31258	0.505039	Not significant	NO
C22orf45	-0.141	0.594062	0.226168	Not significant	NO
C22orf46	-0.027	0.967025	0.0145624	Not significant	NO
C22orf9	-0.058	0.893801	0.048759	Not significant	NO
C2CD2L	-0.127	0.736866	0.132612	Not significant	NO
C2CD3	0.035	0.955928	0.0195748	Not significant	NO
C2CD4A	0.05	0.870493	0.0602347	Not significant	NO
C2orf15	0.018	0.9643	0.015788	Not significant	YES
C2orf16	-0.024	0.955928	0.0195748	Not significant	NO
C2orf18	0.109	0.765944	0.115803	Not significant	NO
C2orf24	-0.064	0.913288	0.0393925	Not significant	NO
C2orf27A	0.061	0.839984	0.0757288	Not significant	NO
C2orf28	-0.013	0.986111	0.00607407	Not significant	NO
C2orf29	-0.01	0.989903	0.00440721	Not significant	NO
C2orf3	0.045	0.937022	0.0282503	Not significant	NO
C2orf34	-0.028	0.960985	0.0172832	Not significant	NO
C2orf42	-0.158	0.659546	0.180755	Not significant	NO
C2orf43	0.165	0.645374	0.190189	Not significant	YES
C2orf44	0.062	0.911421	0.040281	Not significant	NO
C2orf47	-0.168	0.621807	0.206344	Not significant	NO
C2orf49	0.217	0.49688	0.303748	Not significant	NO
C2orf54	-0.028	0.929228	0.0318776	Not significant	NO
C2orf55	0.101	0.714369	0.146077	Not significant	NO
C2orf56	-0.094	0.855573	0.067743	Not significant	NO
C2orf58	-0.065	0.808876	0.0921181	Not significant	NO
C2orf60	-0.017	0.979961	0.00879115	Not significant	NO
C2orf63	-0.031	0.939143	0.0272683	Not significant	NO
C2orf64	-0.337	0.258457	0.587612	Not significant	NO
C2orf67	0.053	0.912442	0.0397949	Not significant	NO
C2orf68	-0.008	0.99173	0.00360642	Not significant	YES
C2orf69	-0.136	0.693336	0.159056	Not significant	NO
C2orf7	-0.169	0.538969	0.268436	Not significant	NO
C2orf72	-0.021	0.968497	0.0139015	Not significant	YES
C2orf74	-0.445	0.223941	0.649867	Not significant	NO
C2orf76	0.117	0.737351	0.132326	Not significant	NO
C2orf77	-0.04	0.905662	0.0430337	Not significant	NO
C2orf79	0.008	0.990013	0.00435898	Not significant	NO
C2orf81	-0.04	0.909347	0.0412703	Not significant	NO
C2orf86	0.003	0.995587	0.00192083	Not significant	NO
C2orf88	-0.116	0.658003	0.181772	Not significant	NO
C2orf89	-0.002	0.997974	0.000880949	Not significant	NO
C3	-0.075	0.80663	0.0933258	Not significant	YES
C3AR1	-0.001	0.99947	0.000230343	Not significant	NO
C3orf1	-0.103	0.842756	0.0742982	Not significant	NO
C3orf10	-0.103	0.821048	0.0856314	Not significant	NO
C3orf14	-0.119	0.661884	0.179218	Not significant	NO
C3orf15	0	0.99947	0.000230343	Not significant	NO
C3orf17	0.09	0.885408	0.0528566	Not significant	YES
C3orf18	-0.334	0.299273	0.523933	Not significant	NO
C3orf19	-0.042	0.955612	0.0197184	Not significant	NO
C3orf21	0.071	0.857831	0.0665983	Not significant	NO
C3orf23	-0.095	0.809176	0.091957	Not significant	NO
C3orf26	-0.045	0.933632	0.0298244	Not significant	NO
C3orf31	-0.264	0.360081	0.443599	Not significant	NO
C3orf32	-0.087	0.75024	0.1248	Not significant	NO
C3orf33	-0.031	0.958699	0.0183176	Not significant	NO
C3orf34	-0.003	0.99657	0.00149237	Not significant	NO
C3orf35	-0.106	0.688235	0.162263	Not significant	YES
C3orf37	-0.317	0.280199	0.552533	Not significant	NO
C3orf38	0.092	0.882043	0.05451	Not significant	NO
C3orf39	-0.026	0.966352	0.0148644	Not significant	NO
C3orf42	0.068	0.879753	0.0556393	Not significant	NO
C3orf47	-0.672	0.197132	0.705242	Not significant	NO
C3orf54	-0.045	0.90827	0.0417849	Not significant	NO
C3orf58	-0.017	0.969108	0.0136279	Not significant	YES
C3orf59	0.053	0.885809	0.0526599	Not significant	NO
C3orf62	-0.058	0.893845	0.0487378	Not significant	NO
C3orf63	-0.005	0.995587	0.00192083	Not significant	NO
C3orf64	0.079	0.862693	0.0641435	Not significant	NO
C3orf67	-0.06	0.836136	0.0777229	Not significant	NO
C3orf70	0.043	0.908795	0.0415342	Not significant	NO
C3orf71	-0.138	0.644368	0.190866	Not significant	NO
C3orf75	-0.089	0.85185	0.069637	Not significant	NO
C3P1	-2.215	0.0949958	1.0223	Not significant	NO
C4A	-0.035	0.927112	0.0328679	Not significant	NO
C4BPA	-0.675	0.22439	0.648997	Not significant	NO
C4BPB	-0.577	0.224148	0.649464	Not significant	NO
C4orf10	-0.001	0.99947	0.000230343	Not significant	NO
C4orf12	-0.006	0.990013	0.00435898	Not significant	NO
C4orf14	0.146	0.691498	0.160209	Not significant	NO
C4orf19	-0.046	0.90827	0.0417849	Not significant	NO
C4orf21	-0.024	0.958449	0.018431	Not significant	NO
C4orf23	-0.187	0.59988	0.221935	Not significant	NO
C4orf27	-0.101	0.811138	0.0909055	Not significant	NO
C4orf29	-0.107	0.724422	0.140008	Not significant	NO
C4orf3	-0.162	0.597645	0.223557	Not significant	YES
C4orf32	-0.087	0.788513	0.103191	Not significant	YES
C4orf33	0.017	0.971019	0.0127725	Not significant	NO
C4orf34	-0.184	0.498228	0.302572	Not significant	NO
C4orf38	-0.047	0.904397	0.0436411	Not significant	NO
C4orf41	0	0.99947	0.000230343	Not significant	NO
C4orf42	-0.022	0.972448	0.0121337	Not significant	NO
C4orf43	0.125	0.745878	0.127332	Not significant	NO
C4orf44	-0.074	0.78039	0.107688	Not significant	NO
C4orf46	0.024	0.96461	0.0156482	Not significant	NO
C4orf48	-0.033	0.917898	0.0372054	Not significant	NO
C4orf52	-0.032	0.950735	0.0219407	Not significant	NO
[truncated: 12,230 more rows]

## Sheet: n.85G>A_MIR518E_DE_genes
gene_ID	log2(FC)	adj_p-value	-log10(adj_p-value)	change_direction	predicted_target_mir-518e-5p&3p
ABCC6	-2.867	0.0268065	1.57176	Down	NO
ACOX2	-4.445	0.00224935	2.64794	Down	NO
ACPP	-2.98	0.0163369	1.78683	Down	YES
ACSL5	-3.29	0.0119301	1.92336	Down	NO
ADAMTSL2	-2.795	0.0226058	1.64578	Down	NO
ADH1B	-3.502	0.0277403	1.55689	Down	YES
ADH1C	-2.728	0.0395397	1.40297	Down	NO
AGR2	-3.2	0.0265569	1.57582	Down	NO
ALCAM	-4.45	1.68612e-05	4.77311	Down	NO
ALDH2	-2.761	0.0148131	1.82935	Down	YES
ALOX15B	-2.714	0.0447724	1.34899	Down	NO
AMIGO2	-2.267	0.0477182	1.32132	Down	NO
AMY1A	-5.342	0.0112946	1.94713	Down	NO
ANTXR2	-1.98	0.0317158	1.49872	Down	YES
APLNR	-2.27	0.0425281	1.37132	Down	YES
AQP3	-2.447	0.048712	1.31236	Down	NO
AQP4	-9.633	0.00120634	2.91853	Down	YES
ARHGAP24	-1.906	0.0374792	1.42621	Down	YES
ARHGEF15	-2.446	0.0277658	1.55649	Down	NO
ARHGEF38	-3.913	0.0230216	1.63786	Down	NO
ASPN	-4.902	0.00312551	2.50508	Down	NO
ATOH8	-3.375	0.0269791	1.56897	Down	NO
ATP10B	-2.695	0.0462115	1.33525	Down	YES
ATP13A4	-5.73	0.0082754	2.08221	Down	NO
ATP9B	-1.752	0.0201052	1.69669	Down	NO
AUTS2	-3.641	0.0111142	1.95412	Down	YES
AZGP1	-8.304	0.00386695	2.41263	Down	NO
BCL2L15	-3.475	0.022865	1.64083	Down	NO
BMP2	-3.95	0.0112946	1.94713	Down	YES
BMP3	-5.154	0.0102068	1.99111	Down	NO
BMP5	-4.72	0.0163369	1.78683	Down	YES
C16orf89	-9.87	0.000279008	3.55438	Down	NO
C1orf116	-3.057	0.0273087	1.5637	Down	NO
C20orf114	-6.314	0.00837684	2.07692	Down	NO
C20orf196	-2.917	0.010893	1.96285	Down	YES
C20orf56	-5.076	0.0148355	1.8287	Down	NO
C4BPA	-7.959	0.000692291	3.15971	Down	YES
C4orf31	-6.825	0.000306958	3.51292	Down	NO
C5orf4	-3.627	0.0174721	1.75766	Down	NO
C7orf63	-2.603	0.0374132	1.42698	Down	NO
C8orf83	-1.605	0.0389536	1.40945	Down	NO
C9orf150	-3.196	0.003785	2.42193	Down	NO
CACNA1D	-3.059	0.0316059	1.50023	Down	YES
CADPS2	-2.829	0.00602323	2.22017	Down	NO
CALCRL	-3.444	0.00549284	2.2602	Down	YES
CAPN9	-3.112	0.0347264	1.45934	Down	NO
CARD6	-2.216	0.0250875	1.60054	Down	NO
CCDC106	-2.154	0.0171536	1.76564	Down	NO
CCL14	-4.12	0.0163369	1.78683	Down	NO
CCL21	-6.612	0.000357478	3.44675	Down	YES
CCNJL	-4.369	0.000963385	3.0162	Down	NO
CD1D	-2.633	0.0316059	1.50023	Down	NO
CDKN2A	-2.573	0.0490175	1.30965	Down	NO
CDKN2B	-4.148	0.003785	2.42193	Down	NO
CEACAM5	-7.736	0.00194669	2.7107	Down	NO
CEACAM6	-8.866	4.30037e-07	6.36649	Down	NO
CERK	-1.448	0.0345761	1.46122	Down	NO
CERKL	-2.687	0.0281118	1.55111	Down	YES
CFI	-2.734	0.0245259	1.61037	Down	NO
CHIA	-2.41	0.0475853	1.32253	Down	NO
CHL1	-2.553	0.0477182	1.32132	Down	NO
CISH	-2.281	0.0348999	1.45718	Down	NO
CLDN18	-3.541	0.0273087	1.5637	Down	NO
CLDN5	-2.918	0.0267573	1.57256	Down	NO
CLEC14A	-2.047	0.0355137	1.4496	Down	NO
CLEC3B	-2.465	0.0477182	1.32132	Down	NO
CLIC6	-3.575	0.0202423	1.69374	Down	NO
CP	-2.847	0.0388549	1.41055	Down	NO
CPA3	-5.107	0.00549284	2.2602	Down	NO
CRIP2	-2.877	0.0167978	1.77475	Down	NO
CRTAC1	-4.478	0.0164591	1.78359	Down	YES
CTSE	-6.776	0.003785	2.42193	Down	NO
CXCL14	-7.652	0.00386695	2.41263	Down	NO
CXCL17	-5.786	0.000963385	3.0162	Down	NO
CYGB	-2.178	0.0232034	1.63445	Down	YES
CYP2B7P1	-6.814	0.00264078	2.57827	Down	NO
CYP4X1	-2.622	0.04559	1.34113	Down	NO
CYYR1	-1.824	0.0446584	1.3501	Down	NO
DCLK1	-2.68	0.0389494	1.4095	Down	YES
DHRS3	-2.643	0.0191599	1.71761	Down	NO
DLL4	-2.158	0.0268065	1.57176	Down	NO
DMBT1	-6.781	0.00549284	2.2602	Down	NO
DMRTA1	-3.837	0.0251692	1.59913	Down	YES
DNAH5	-3.748	0.0132101	1.87909	Down	NO
DNAJC12	-2.74	0.0451005	1.34582	Down	NO
DNAJC15	-1.904	0.0451005	1.34582	Down	NO
DNALI1	-4.271	0.00521806	2.28249	Down	NO
DOCK4	-3.037	0.00274811	2.56097	Down	NO
DUSP6	-2.722	0.0259511	1.58584	Down	NO
ECM2	-2.969	0.0171536	1.76564	Down	YES
EDNRA	-3.368	0.00766136	2.11569	Down	NO
EFHC2	-2.604	0.0475853	1.32253	Down	YES
EFNA5	-2.403	0.0373139	1.42813	Down	NO
EFNB2	-2.509	0.0275311	1.56018	Down	YES
EHF	-6.108	2.92193e-06	5.53433	Down	YES
ELF5	-2.682	0.0463132	1.3343	Down	NO
ELN	-5.584	0.000672237	3.17248	Down	NO
EMCN	-3.714	0.00993009	2.00305	Down	YES
ENTPD3	-4.003	0.00973163	2.01181	Down	NO
ERG	-2.158	0.0281085	1.55116	Down	NO
FABP4	-2.522	0.0477182	1.32132	Down	NO
FAM13C	-3.496	0.0258359	1.58778	Down	NO
FAM165B	-1.673	0.0373139	1.42813	Down	NO
FAM176A	-2.743	0.0282507	1.54897	Down	NO
FAM50B	-3.614	0.00696653	2.15698	Down	NO
FBXO16	-2.187	0.0477182	1.32132	Down	NO
FCER1A	-2.952	0.0390061	1.40887	Down	NO
FCGBP	-3.401	0.0268065	1.57176	Down	NO
FGF13	-3.107	0.0304907	1.51583	Down	NO
FGL1	-23.013	1.09056e-07	6.96235	Down	NO
FLRT3	-5.791	0.000692291	3.15971	Down	NO
FOXA1	-4.243	0.00188129	2.72554	Down	YES
FOXA2	-5.346	0.00604453	2.21864	Down	NO
FOXP1	-1.579	0.0275311	1.56018	Down	YES
FOXS1	-3.457	0.028922	1.53877	Down	NO
FRG1B	-1.939	0.0250875	1.60054	Down	YES
GALNT14	-3.671	0.0224478	1.64883	Down	NO
GALNT5	-2.396	0.0490175	1.30965	Down	NO
GALNTL4	-2.994	0.00604453	2.21864	Down	NO
GJA4	-2.993	0.0111142	1.95412	Down	NO
GJB1	-2.657	0.0471443	1.32657	Down	NO
GLRB	-2.937	0.0250875	1.60054	Down	NO
GOLGA7B	-3.779	0.015917	1.79814	Down	YES
GPCPD1	-2.055	0.0347264	1.45934	Down	NO
GPD1L	-2.479	0.0201052	1.69669	Down	NO
GPR116	-4.375	0.00569105	2.24481	Down	NO
GPX3	-2.392	0.0425281	1.37132	Down	NO
GPX4	-1.485	0.0446584	1.3501	Down	NO
GRAP	-2.273	0.0251692	1.59913	Down	NO
GSTA1	-4.799	0.0163369	1.78683	Down	NO
GSTT1	-6.527	0.0078333	2.10606	Down	NO
GUCY1A3	-3.493	0.00206272	2.68556	Down	NO
GUCY1B3	-2.725	0.010245	1.98949	Down	NO
HABP2	-6.104	0.00922403	2.03508	Down	YES
HAS3	-5.176	0.00627982	2.20205	Down	NO
HES1	-1.897	0.0455859	1.34117	Down	NO
HHLA2	-2.813	0.0369249	1.43268	Down	NO
HLF	-2.509	0.0490175	1.30965	Down	NO
HNF1B	-3.2	0.0219647	1.65828	Down	NO
HOPX	-4.02	0.0159565	1.79706	Down	NO
HP	-2.82	0.0425281	1.37132	Down	NO
HS6ST2	-2.41	0.0477182	1.32132	Down	NO
IFFO2	-2.563	0.0168025	1.77463	Down	YES
INMT	-3.708	0.0189586	1.72219	Down	YES
IPW	-2.349	0.0415873	1.38104	Down	NO
IRF2BP2	-1.144	0.0265053	1.57667	Down	YES
IRX3	-3.209	0.0224478	1.64883	Down	NO
IRX5	-3.856	0.0159674	1.79677	Down	NO
ITGA1	-1.97	0.0462115	1.33525	Down	YES
ITGA9	-4.127	0.00683568	2.16522	Down	NO
JAG1	-3.046	0.0159674	1.79677	Down	NO
KAL1	-2.649	0.0345176	1.46196	Down	NO
KCNK5	-2.812	0.0267573	1.57256	Down	NO
KCNQ3	-3.616	0.0253753	1.59559	Down	YES
KDR	-2.422	0.0408065	1.38927	Down	NO
KIAA1147	-1.952	0.0171536	1.76564	Down	YES
KIAA1274	-2.728	0.014003	1.85378	Down	NO
KIAA1797	-3.366	8.2569e-05	4.08318	Down	NO
KIT	-5.052	0.00604453	2.21864	Down	NO
KITLG	-4.151	0.000519928	3.28406	Down	NO
KLHDC7A	-6.728	0.00549284	2.2602	Down	YES
KLHDC8B	-1.824	0.0373139	1.42813	Down	NO
KLHL3	-2.42	0.0277528	1.55669	Down	NO
KLHL9	-3.818	4.65775e-07	6.33182	Down	YES
KLK11	-2.896	0.0401682	1.39612	Down	NO
LARGE	-3.816	0.00604453	2.21864	Down	NO
LCN2	-2.586	0.0477182	1.32132	Down	NO
LDLRAD2	-2.56	0.0171062	1.76685	Down	NO
LFNG	-3.004	0.0194587	1.71089	Down	NO
LGR4	-2.479	0.0253753	1.59559	Down	YES
LMO3	-8.767	3.825e-05	4.41737	Down	YES
LOC84740	-4.083	0.0191012	1.71894	Down	NO
LONRF3	-2.615	0.0227122	1.64374	Down	NO
LPAR6	-1.656	0.0477182	1.32132	Down	NO
LPPR1	-2.518	0.0477182	1.32132	Down	YES
LRIG1	-2.834	0.00604453	2.21864	Down	NO
LRRC4	-2.966	0.0345154	1.46199	Down	NO
LRRN4	-4.113	0.0215103	1.66735	Down	NO
LTF	-5.175	0.0108404	1.96496	Down	YES
LYVE1	-3.063	0.0279917	1.55297	Down	YES
MACROD2	-2.887	0.0415873	1.38104	Down	YES
MAMDC2	-3.496	0.0265545	1.57586	Down	NO
MAOA	-4.699	0.00255096	2.5933	Down	YES
MDK	-2.496	0.0341347	1.4668	Down	NO
MECOM	-2.396	0.0414187	1.3828	Down	NO
MEF2C	-1.883	0.0451005	1.34582	Down	YES
MFRP	-2.452	0.0164591	1.78359	Down	YES
MFSD4	-3.183	0.0304178	1.51687	Down	NO
MGP	-5.196	0.000100556	3.99759	Down	YES
MICAL2	-2.299	0.0261605	1.58235	Down	YES
MMP7	-6.995	0.0016797	2.77477	Down	NO
MON1A	-1.228	0.0382966	1.41684	Down	NO
MPND	-1.739	0.0189586	1.72219	Down	NO
MSMB	-22.618	5.72534e-07	6.2422	Down	NO
MSTN	-14.06	0.000682914	3.16563	Down	NO
MTAP	-3.624	0.00151941	2.81832	Down	NO
MUC21	-4.673	0.0163369	1.78683	Down	YES
MUC5B	-6.621	0.00627982	2.20205	Down	NO
MYCT1	-3.203	0.00670965	2.1733	Down	NO
MYH11	-4.774	0.00396577	2.40167	Down	YES
NAPSA	-8.71	1.48508e-05	4.82825	Down	NO
NCALD	-2.048	0.0498693	1.30217	Down	NO
NEIL2	-1.434	0.0455859	1.34117	Down	NO
NFIB	-2.884	0.00569105	2.24481	Down	YES
NKX2-1	-9.065	4.30037e-07	6.36649	Down	NO
NOTCH4	-1.824	0.0455859	1.34117	Down	YES
NOV	-3.1	0.0230216	1.63786	Down	YES
NR3C2	-3.781	0.00802835	2.09537	Down	YES
NRP1	-2.607	0.0102068	1.99111	Down	YES
OAZ1	-2.359	0.000708337	3.14976	Down	NO
OSBPL7	-1.906	0.0463751	1.33371	Down	NO
PAEP	-23.062	4.30037e-07	6.36649	Down	NO
PARD6G	-1.819	0.0477182	1.32132	Down	YES
PARM1	-4.361	0.00408281	2.38904	Down	NO
PCDH12	-2.432	0.0197301	1.70487	Down	NO
PCTP	-3.708	9.42432e-06	5.02575	Down	NO
PDGFC	-2.029	0.0347264	1.45934	Down	NO
PDZK1IP1	-3.164	0.0265569	1.57582	Down	NO
PEBP4	-3.638	0.0265569	1.57582	Down	NO
PECAM1	-1.649	0.0345176	1.46196	Down	NO
PGM2L1	-2.198	0.0317746	1.49792	Down	YES
PHC2	-1.032	0.0455859	1.34117	Down	NO
PID1	-2.874	0.0268065	1.57176	Down	NO
PIGR	-10.194	8.2569e-05	4.08318	Down	NO
PITPNM3	-3.949	0.00255096	2.5933	Down	YES
PLA2G5	-3.165	0.0348999	1.45718	Down	NO
PLUNC	-25.357	3.56288e-08	7.4482	Down	NO
PLXNB3	-2.566	0.0462115	1.33525	Down	NO
PMP22	-1.761	0.0446584	1.3501	Down	NO
PPP1R1B	-8.969	0.00194695	2.71065	Down	YES
PRICKLE2	-2.382	0.0191476	1.71789	Down	YES
PRR15L	-3.473	0.0134711	1.8706	Down	NO
PSD3	-3.466	0.000855343	3.06786	Down	YES
PTPLAD2	-2.167	0.0268065	1.57176	Down	YES
PTPRB	-2.023	0.0474643	1.32363	Down	YES
RAB40B	-2.678	0.0111142	1.95412	Down	NO
RABEPK	-1.154	0.0404662	1.39291	Down	NO
RAMP1	-2.624	0.0403406	1.39426	Down	NO
RAMP2	-3.622	0.00335341	2.47451	Down	NO
RAPGEF5	-2.129	0.0285785	1.54396	Down	YES
RARA	-1.232	0.0492347	1.30773	Down	NO
RASD1	-4.118	0.0159674	1.79677	Down	NO
RASGEF1B	-1.737	0.0447938	1.34878	Down	YES
RGS5	-2.683	0.0191599	1.71761	Down	YES
RNF43	-3.173	0.00946003	2.02411	Down	NO
ROBO2	-3.839	0.0253006	1.59687	Down	YES
RORC	-2.557	0.0321374	1.49299	Down	NO
ROS1	-10.016	0.00048376	3.31537	Down	YES
RPH3AL	-2.857	0.0164591	1.78359	Down	NO
RUNX1	-2.233	0.00474293	2.32395	Down	NO
S1PR1	-1.914	0.0455859	1.34117	Down	NO
SCAI	-2.1	0.0189586	1.72219	Down	YES
SCGB1A1	-5.576	0.0119175	1.92382	Down	NO
SCGB3A2	-7.076	0.0054022	2.26743	Down	NO
SCN7A	-3.352	0.0283205	1.5479	Down	NO
SCNN1B	-5.204	0.00401045	2.39681	Down	YES
SCNN1G	-4.775	0.0142242	1.84697	Down	NO
SCTR	-4.69	0.0169194	1.77161	Down	NO
SDCCAG8	-1.034	0.0477182	1.32132	Down	NO
SEMA3G	-2.405	0.0347264	1.45934	Down	YES
SFTA2	-4.611	0.00683568	2.16522	Down	NO
SFTA3	-9.797	3.30663e-05	4.48061	Down	NO
SFTPA1	-9.188	0.000366139	3.43635	Down	NO
SFTPA2	-9.724	0.000145498	3.83714	Down	NO
SFTPB	-9.949	5.64426e-06	5.24839	Down	NO
SFTPC	-6.368	0.00802835	2.09537	Down	NO
SFTPD	-3.106	0.0350264	1.4556	Down	NO
SGPP2	-2.121	0.0482596	1.31642	Down	YES
SH3BGRL	-1.216	0.0484468	1.31473	Down	YES
SLC16A9	-4.758	0.015917	1.79814	Down	NO
SLC26A9	-8.744	0.00222804	2.65208	Down	NO
SLC34A2	-8.629	4.30037e-07	6.36649	Down	NO
SLC44A4	-6.077	9.93148e-05	4.00299	Down	NO
SLC4A4	-2.525	0.0452102	1.34476	Down	YES
SLC6A14	-4.421	0.0119175	1.92382	Down	YES
SLC6A20	-2.829	0.0408065	1.38927	Down	NO
SLC9A3R2	-3.43	0.00110166	2.95795	Down	NO
SMAD7	-1.359	0.0465035	1.33251	Down	NO
SMARCA4	-1.996	0.0242329	1.61559	Down	NO
SNTB1	-3.104	0.00802835	2.09537	Down	YES
SOX9	-2.987	0.0345758	1.46123	Down	NO
SPDEF	-4.033	0.0134877	1.87006	Down	NO
SPOP	-0.78	0.0432015	1.3645	Down	NO
SPRY1	-2.497	0.0111142	1.95412	Down	YES
ST3GAL5	-3.204	0.0159674	1.79677	Down	NO
ST6GALNAC6	-1.672	0.0265545	1.57586	Down	NO
STK11	-2.9	0.00159684	2.79674	Down	NO
STK32A	-2.876	0.0419232	1.37755	Down	NO
SUSD4	-3.789	0.0173675	1.76026	Down	NO
TBC1D25	-3.714	2.38126e-10	9.62319	Down	NO
TBX2	-3.16	0.0108126	1.96607	Down	NO
TBXAS1	-1.816	0.0493042	1.30712	Down	NO
TCN1	-16.245	0.000139561	3.85524	Down	NO
TENC1	-2.216	0.0265053	1.57667	Down	NO
TFF3	-6.686	0.00659244	2.18095	Down	YES
TGFBR2	-1.718	0.0447639	1.34907	Down	YES
TIE1	-2.173	0.0317746	1.49792	Down	NO
TM4SF4	-22.055	1.62863e-06	5.78818	Down	NO
TMEM130	-2.642	0.0474643	1.32363	Down	NO
TMEM163	-5.522	0.00255096	2.5933	Down	NO
TMEM173	-3.27	0.00275478	2.55991	Down	NO
TMEM204	-2.833	0.00802835	2.09537	Down	NO
TMEM8B	-1.512	0.0477182	1.32132	Down	NO
TMPRSS4	-5.317	0.00352791	2.45248	Down	NO
TNFSF13	-3.28	0.000702431	3.1534	Down	NO
TOX3	-6.271	0.00521806	2.28249	Down	NO
TP53	-1.893	0.0330002	1.48148	Down	YES
TP53I11	-2.05	0.0191599	1.71761	Down	NO
TPPP	-2.386	0.0482596	1.31642	Down	NO
TPSAB1	-4.708	0.00455552	2.34146	Down	NO
TPSB2	-2.972	0.0309953	1.5087	Down	NO
TRIM2	-3.417	0.00604453	2.21864	Down	YES
TSPAN18	-2.126	0.0425281	1.37132	Down	YES
VASH1	-2.22	0.0202423	1.69374	Down	YES
VIPR1	-3.683	0.0151644	1.81918	Down	NO
VLDLR	-2.35	0.0321364	1.493	Down	YES
VSIG2	-4.176	0.0208795	1.68028	Down	NO
WFDC1	-2.531	0.0455859	1.34117	Down	NO
WFDC2	-4.116	0.00745425	2.1276	Down	NO
WLS	-2.837	0.0197301	1.70487	Down	NO
WSCD1	-2.515	0.0477182	1.32132	Down	NO
XAGE1D	-6.359	0.00802835	2.09537	Down	NO
XYLT1	-2.397	0.0392537	1.40612	Down	YES
ZBTB7C	-2.571	0.0455859	1.34117	Down	NO
ZHX3	-1.795	0.0163369	1.78683	Down	YES
ZNF608	-2.93	0.0114268	1.94208	Down	YES
ZSWIM3	-1.28	0.0455859	1.34117	Down	NO
100133144	-0.119	0.735517	0.133407	Not significant	NO
100134869	-0.007	0.986639	0.00584157	Not significant	NO
10357	0.282	0.451113	0.345714	Not significant	NO
10431	0.147	0.709309	0.149164	Not significant	NO
155060	-0.299	0.446692	0.349991	Not significant	NO
390284	-0.2	0.5898	0.229295	Not significant	NO
57714	0.512	0.282278	0.549324	Not significant	NO
645851	0.007	0.987247	0.00557426	Not significant	NO
653553	-0.118	0.742765	0.129148	Not significant	NO
729884	-0.193	0.601764	0.220574	Not significant	NO
8225	-0.601	0.182569	0.738572	Not significant	NO
90288	-0.496	0.328982	0.482828	Not significant	NO
A1BG	-0.142	0.692597	0.159519	Not significant	NO
A2LD1	0.134	0.72708	0.138418	Not significant	NO
A2M	-1.905	0.0555011	1.2557	Not significant	NO
A4GALT	0.084	0.813477	0.0896547	Not significant	NO
AAAS	0.229	0.549517	0.260019	Not significant	NO
AACS	-0.082	0.832254	0.0797442	Not significant	NO
AADAC	-1.403	0.0976849	1.01017	Not significant	NO
AADAT	-0.044	0.907142	0.0423248	Not significant	NO
AAGAB	0.496	0.206231	0.685645	Not significant	YES
AAK1	0.488	0.222903	0.651883	Not significant	YES
AAMP	-0.007	0.988818	0.00488359	Not significant	NO
AARS	0.193	0.611275	0.213763	Not significant	YES
AARS2	0.231	0.544504	0.263999	Not significant	NO
AARSD1	-0.459	0.238362	0.622763	Not significant	NO
AASDH	0.256	0.494947	0.305442	Not significant	NO
AASDHPPT	0.166	0.678647	0.168356	Not significant	NO
AASS	-0.68	0.231986	0.634538	Not significant	NO
AATF	-0.058	0.89602	0.0476822	Not significant	NO
AATK	-0.212	0.574805	0.240479	Not significant	NO
ABAT	-0.608	0.262442	0.580967	Not significant	NO
ABCA1	0.031	0.938202	0.0277038	Not significant	YES
ABCA10	-0.492	0.331744	0.479197	Not significant	NO
ABCA11P	-0.064	0.874545	0.058218	Not significant	NO
ABCA12	-0.39	0.389203	0.409824	Not significant	NO
ABCA13	-1.196	0.13843	0.858769	Not significant	NO
ABCA2	-0.183	0.619364	0.208054	Not significant	NO
ABCA3	-1.004	0.169548	0.770708	Not significant	NO
ABCA4	0.047	0.898121	0.0466651	Not significant	NO
ABCA5	0.158	0.660142	0.180363	Not significant	NO
ABCA6	-1.539	0.0975209	1.0109	Not significant	YES
ABCA7	-0.41	0.345284	0.461823	Not significant	NO
ABCA8	-2.173	0.0647904	1.18849	Not significant	NO
ABCA9	-0.427	0.357011	0.447318	Not significant	NO
ABCB1	-0.199	0.592566	0.227263	Not significant	NO
ABCB10	-0.002	0.997999	0.000869836	Not significant	NO
ABCB6	0.437	0.338911	0.469915	Not significant	NO
ABCB7	0.051	0.91262	0.03971	Not significant	NO
ABCB8	-0.159	0.682861	0.165667	Not significant	YES
ABCB9	-0.216	0.556766	0.254327	Not significant	YES
ABCC1	-0.101	0.786525	0.104288	Not significant	NO
ABCC10	0.089	0.829061	0.0814135	Not significant	NO
ABCC2	0.18	0.618446	0.208699	Not significant	NO
ABCC3	-0.417	0.357011	0.447318	Not significant	NO
ABCC4	-0.499	0.309105	0.509895	Not significant	NO
ABCC5	-0.115	0.751247	0.124217	Not significant	NO
ABCC6P1	-0.403	0.377269	0.423349	Not significant	NO
ABCC6P2	-1.993	0.0647904	1.18849	Not significant	NO
ABCC9	-0.774	0.207386	0.683221	Not significant	YES
ABCD2	-0.086	0.807632	0.0927866	Not significant	NO
ABCD3	-0.07	0.864641	0.0631643	Not significant	NO
ABCD4	-0.093	0.824036	0.0840539	Not significant	NO
ABCE1	-0.067	0.878263	0.0563752	Not significant	NO
ABCF1	0.259	0.489986	0.309816	Not significant	YES
ABCF2	-0.027	0.952768	0.0210127	Not significant	YES
ABCF3	0.058	0.898537	0.0464642	Not significant	YES
ABCG1	0.138	0.703656	0.152639	Not significant	YES
ABCG2	1.818	0.0647904	1.18849	Not significant	NO
ABCG4	0.417	0.350882	0.454839	Not significant	NO
ABHD1	0.012	0.974079	0.0114057	Not significant	NO
ABHD10	-0.295	0.428329	0.368223	Not significant	NO
ABHD11	-0.348	0.380342	0.419825	Not significant	NO
ABHD12	-0.111	0.777664	0.109208	Not significant	NO
ABHD13	0.168	0.66753	0.175529	Not significant	YES
ABHD14A	-1.082	0.110293	0.957452	Not significant	NO
ABHD14B	-0.952	0.100105	0.999546	Not significant	NO
ABHD15	-0.137	0.733102	0.134836	Not significant	YES
ABHD2	-0.221	0.551462	0.258484	Not significant	YES
ABHD3	0.114	0.758066	0.120293	Not significant	NO
ABHD4	0.552	0.224183	0.649397	Not significant	NO
ABHD5	-0.212	0.581323	0.235582	Not significant	YES
ABHD6	-0.233	0.530903	0.274985	Not significant	NO
ABHD8	0.124	0.751526	0.124056	Not significant	NO
ABI1	-0.089	0.83588	0.0778558	Not significant	NO
ABI2	0.025	0.95615	0.0194739	Not significant	YES
ABI3	-0.436	0.315433	0.501093	Not significant	NO
ABI3BP	-0.171	0.64022	0.193671	Not significant	NO
ABL1	-0.066	0.879345	0.0558406	Not significant	NO
ABL2	0.086	0.832459	0.079637	Not significant	NO
ABLIM1	-0.046	0.905806	0.0429647	Not significant	NO
ABLIM2	-0.093	0.790056	0.102342	Not significant	NO
ABLIM3	-0.038	0.920565	0.0359455	Not significant	NO
ABO	-0.134	0.708217	0.149834	Not significant	NO
ABP1	0.173	0.640324	0.1936	Not significant	NO
ABR	-0.478	0.248003	0.605544	Not significant	NO
ABT1	0.085	0.838213	0.0766457	Not significant	NO
ABTB1	-0.485	0.250777	0.600712	Not significant	NO
ABTB2	0.423	0.338169	0.470866	Not significant	NO
ACAA1	-0.304	0.420428	0.376308	Not significant	NO
ACAA2	-0.426	0.315422	0.501108	Not significant	NO
ACACA	-0.055	0.895362	0.0480015	Not significant	YES
ACACB	-0.095	0.790187	0.10227	Not significant	NO
ACAD10	-0.054	0.898856	0.0463097	Not significant	NO
ACAD11	-0.238	0.52052	0.283563	Not significant	NO
ACAD8	-0.046	0.905753	0.0429902	Not significant	NO
ACAD9	-0.086	0.836992	0.0772784	Not significant	NO
ACADL	-0.099	0.777773	0.109147	Not significant	NO
ACADM	-0.062	0.883763	0.0536644	Not significant	NO
ACADS	-0.173	0.639516	0.194149	Not significant	NO
ACADSB	-0.271	0.48005	0.318713	Not significant	YES
ACADVL	-0.189	0.614051	0.211795	Not significant	NO
ACAN	-0.975	0.17709	0.751806	Not significant	NO
ACAP1	-0.228	0.544843	0.263728	Not significant	NO
ACAP2	0.117	0.760108	0.119125	Not significant	NO
ACAP3	-0.154	0.674968	0.170717	Not significant	NO
ACAT1	-0.256	0.490573	0.309296	Not significant	NO
ACAT2	0.27	0.476065	0.322334	Not significant	NO
ACBD3	-0.041	0.929103	0.0319362	Not significant	NO
ACBD4	-0.172	0.645775	0.189919	Not significant	NO
ACBD5	-0.154	0.692499	0.159581	Not significant	NO
ACBD6	0.11	0.788276	0.103322	Not significant	NO
ACBD7	0.012	0.973467	0.0116786	Not significant	NO
ACCN1	-0.334	0.413827	0.383181	Not significant	NO
ACCN2	-0.139	0.699507	0.155208	Not significant	NO
ACCN3	0.084	0.811955	0.0904681	Not significant	NO
ACCS	-0.295	0.452756	0.344136	Not significant	NO
ACD	0.169	0.658782	0.181259	Not significant	NO
ACE	-1.042	0.130618	0.883998	Not significant	NO
ACER2	1.891	0.0636059	1.1965	Not significant	YES
ACER3	0.215	0.568423	0.245329	Not significant	YES
ACHE	-0.288	0.482329	0.316657	Not significant	NO
ACIN1	-0.047	0.917189	0.0375412	Not significant	NO
ACLY	-0.07	0.866542	0.0622106	Not significant	NO
ACN9	-0.236	0.524073	0.280608	Not significant	YES
ACO1	-0.545	0.237572	0.624205	Not significant	YES
ACO2	-0.079	0.852913	0.0690951	Not significant	NO
ACOT1	0.009	0.983774	0.00710484	Not significant	NO
ACOT11	-0.052	0.891466	0.0498954	Not significant	NO
ACOT13	0.104	0.784565	0.105371	Not significant	YES
ACOT2	0.039	0.928034	0.0324362	Not significant	NO
ACOT4	0.315	0.420758	0.375968	Not significant	YES
ACOT7	0.303	0.428609	0.367939	Not significant	NO
ACOT8	-0.291	0.436508	0.360008	Not significant	NO
ACOT9	0.022	0.961616	0.0169982	Not significant	YES
ACOX1	0.199	0.606539	0.217141	Not significant	YES
ACOX3	0.196	0.604606	0.218528	Not significant	NO
ACOXL	-0.12	0.735411	0.13347	Not significant	NO
ACP1	0.128	0.755226	0.121923	Not significant	NO
ACP2	-0.014	0.976374	0.0103838	Not significant	NO
ACP5	-0.297	0.445452	0.351199	Not significant	NO
ACP6	-0.242	0.513825	0.289185	Not significant	YES
ACPL2	0.171	0.646977	0.189111	Not significant	NO
ACRBP	-0.207	0.572566	0.242175	Not significant	NO
ACSBG1	-0.228	0.555658	0.255193	Not significant	NO
ACSF2	0.222	0.546938	0.262062	Not significant	YES
ACSF3	0.117	0.770611	0.113165	Not significant	NO
ACSL1	-0.177	0.632967	0.198619	Not significant	NO
ACSL3	1.087	0.0750676	1.12455	Not significant	NO
ACSL4	-0.139	0.702057	0.153627	Not significant	YES
ACSL6	-0.173	0.640536	0.193457	Not significant	YES
ACSM1	-0.423	0.367659	0.434554	Not significant	NO
ACSM3	-1.161	0.140709	0.851679	Not significant	YES
ACSM5	-0.392	0.386336	0.413035	Not significant	NO
ACSS1	-1.629	0.0740691	1.13036	Not significant	NO
ACSS2	-0.019	0.963126	0.016317	Not significant	NO
ACSS3	0.028	0.940092	0.0268298	Not significant	NO
ACTA2	-0.531	0.280733	0.551706	Not significant	NO
ACTB	-0.103	0.803837	0.0948318	Not significant	NO
ACTG1	-0.08	0.848004	0.0716023	Not significant	YES
ACTG2	-0.694	0.240147	0.619523	Not significant	NO
ACTL6A	0.139	0.715323	0.145498	Not significant	NO
ACTN1	0.24	0.516728	0.286738	Not significant	NO
ACTN2	-0.146	0.687991	0.162417	Not significant	NO
ACTN4	1.087	0.0647904	1.18849	Not significant	YES
ACTR10	-0.094	0.824036	0.0840539	Not significant	NO
ACTR1A	0.152	0.710865	0.148213	Not significant	YES
ACTR1B	0.032	0.944056	0.0250024	Not significant	NO
ACTR2	0.268	0.477027	0.321457	Not significant	NO
ACTR3	0.259	0.490475	0.309383	Not significant	NO
ACTR3B	-0.155	0.677119	0.169335	Not significant	NO
ACTR3C	0.018	0.962585	0.016561	Not significant	YES
ACTR5	-0.297	0.427242	0.369326	Not significant	NO
ACTR6	0.69	0.126587	0.897611	Not significant	NO
ACTR8	-0.227	0.555082	0.255643	Not significant	NO
ACVR1	-0.537	0.181188	0.741872	Not significant	NO
ACVR1B	-0.034	0.934389	0.0294724	Not significant	NO
ACVR1C	0.01	0.98085	0.0083976	Not significant	YES
ACVR2A	0.104	0.795548	0.0993337	Not significant	YES
ACVR2B	0.18	0.627454	0.202418	Not significant	YES
ACVRL1	-0.681	0.191875	0.716982	Not significant	YES
ACY1	-0.385	0.347203	0.459416	Not significant	NO
ACY3	-0.078	0.825577	0.0832427	Not significant	NO
ACYP1	0.043	0.913563	0.0392614	Not significant	NO
ACYP2	-0.262	0.482365	0.316624	Not significant	NO
ADA	0.028	0.942895	0.0255364	Not significant	NO
ADAL	0.172	0.646977	0.189111	Not significant	NO
ADAM10	0.492	0.244717	0.611336	Not significant	NO
ADAM12	0.133	0.709994	0.148746	Not significant	NO
ADAM15	-0.193	0.600243	0.221673	Not significant	NO
ADAM17	0.502	0.236093	0.626917	Not significant	YES
ADAM19	-0.499	0.303883	0.517293	Not significant	YES
ADAM21	-0.404	0.371385	0.430175	Not significant	NO
ADAM22	-0.335	0.435638	0.360874	Not significant	YES
ADAM28	-1.784	0.0755868	1.12155	Not significant	NO
ADAM6	-0.336	0.433495	0.363016	Not significant	NO
ADAM8	-0.084	0.812201	0.0903367	Not significant	NO
ADAM9	0.12	0.739228	0.131222	Not significant	YES
ADAMDEC1	0.036	0.924515	0.0340859	Not significant	NO
ADAMTS1	0.604	0.255738	0.592204	Not significant	NO
ADAMTS10	-0.374	0.385633	0.413825	Not significant	NO
ADAMTS12	-0.322	0.442473	0.354113	Not significant	NO
ADAMTS13	-0.411	0.368574	0.433475	Not significant	NO
ADAMTS14	-0.669	0.242674	0.614976	Not significant	NO
ADAMTS15	-0.163	0.654803	0.18389	Not significant	NO
ADAMTS16	-1.115	0.152145	0.817743	Not significant	NO
ADAMTS17	0.144	0.688094	0.162352	Not significant	NO
ADAMTS18	-0.77	0.203705	0.690998	Not significant	YES
ADAMTS2	-0.336	0.423876	0.372761	Not significant	YES
ADAMTS3	0.077	0.828317	0.0818034	Not significant	YES
ADAMTS4	-0.207	0.579505	0.236943	Not significant	NO
ADAMTS5	-0.305	0.455627	0.34139	Not significant	YES
ADAMTS6	-0.122	0.730398	0.13644	Not significant	NO
ADAMTS7	-0.181	0.620558	0.207218	Not significant	NO
ADAMTS8	-1.389	0.119492	0.922662	Not significant	NO
ADAMTS9	-2.056	0.0532939	1.27332	Not significant	YES
ADAMTSL3	-0.099	0.777331	0.109394	Not significant	NO
ADAMTSL5	0.015	0.966765	0.0146792	Not significant	NO
ADAP1	-0.006	0.987518	0.00545484	Not significant	NO
ADAP2	-0.064	0.869969	0.0604962	Not significant	NO
ADAR	0.264	0.482329	0.316657	Not significant	YES
ADARB1	0.104	0.779412	0.108233	Not significant	YES
ADAT1	0.093	0.81658	0.0880014	Not significant	NO
ADAT2	-0.147	0.687612	0.162657	Not significant	YES
ADAT3	-0.078	0.832161	0.0797928	Not significant	NO
ADC	-1.219	0.110293	0.957452	Not significant	NO
ADCK1	0.053	0.900813	0.0453651	Not significant	NO
ADCK2	-0.128	0.746766	0.126816	Not significant	NO
ADCK4	0.356	0.350384	0.455456	Not significant	NO
ADCK5	-0.252	0.501161	0.300023	Not significant	NO
ADCY1	-0.185	0.619253	0.208132	Not significant	NO
ADCY2	-0.863	0.178876	0.747447	Not significant	YES
ADCY3	0.222	0.549282	0.260205	Not significant	NO
ADCY4	-0.899	0.15482	0.810172	Not significant	NO
ADCY5	-0.56	0.295515	0.52942	Not significant	NO
ADCY6	-0.172	0.646157	0.189662	Not significant	YES
ADCY7	-0.283	0.458665	0.338505	Not significant	NO
ADCY9	-0.01	0.98115	0.00826479	Not significant	NO
ADD1	0.165	0.683296	0.165391	Not significant	YES
ADD3	0.041	0.916378	0.0379255	Not significant	NO
ADH5	-0.268	0.476872	0.321599	Not significant	YES
ADHFE1	-0.281	0.483292	0.31579	Not significant	NO
ADI1	-0.012	0.975802	0.0106382	Not significant	YES
ADIPOR1	0.051	0.910993	0.0404851	Not significant	YES
ADIPOR2	0.26	0.485894	0.313458	Not significant	YES
ADK	0.106	0.774697	0.110868	Not significant	NO
ADM	0.104	0.764783	0.116462	Not significant	NO
ADM2	-0.16	0.6563	0.182898	Not significant	YES
ADNP	-0.2	0.607325	0.216579	Not significant	NO
ADNP2	-0.215	0.572566	0.242175	Not significant	NO
ADO	0.103	0.809011	0.0920458	Not significant	YES
ADORA1	-0.211	0.577474	0.238468	Not significant	NO
ADORA2A	-0.361	0.365073	0.43762	Not significant	NO
ADORA2B	-1.37	0.0975209	1.0109	Not significant	NO
ADORA3	-0.378	0.380342	0.419825	Not significant	NO
ADPGK	0.207	0.595051	0.225446	Not significant	NO
ADPRH	-0.011	0.980991	0.00833518	Not significant	NO
ADPRHL2	0.335	0.369836	0.431991	Not significant	NO
ADRA1B	-0.287	0.48209	0.316871	Not significant	NO
ADRA2A	-1.151	0.146876	0.833049	Not significant	NO
ADRB1	-1.138	0.147841	0.830205	Not significant	NO
ADRB2	-0.495	0.319317	0.495778	Not significant	NO
ADRBK1	0.045	0.922197	0.0351762	Not significant	NO
ADRBK2	-0.178	0.628917	0.201407	Not significant	YES
ADRM1	-0.042	0.924319	0.0341781	Not significant	NO
ADSL	-0.049	0.909678	0.0411125	Not significant	NO
ADSS	-0.138	0.73348	0.134612	Not significant	NO
ADSSL1	-0.277	0.483292	0.31579	Not significant	NO
AEBP1	-0.262	0.494947	0.305442	Not significant	NO
AEBP2	0.093	0.817145	0.0877011	Not significant	NO
AEN	-0.008	0.986859	0.00574475	Not significant	YES
AES	-0.697	0.119869	0.921292	Not significant	NO
AFAP1	0.268	0.476276	0.322141	Not significant	NO
AFAP1L1	0.072	0.848527	0.0713341	Not significant	NO
AFAP1L2	-0.001	0.998253	0.000759203	Not significant	NO
AFF1	0.66	0.139682	0.854859	Not significant	YES
AFF3	-0.947	0.180795	0.742814	Not significant	NO
AFF4	-0.026	0.952942	0.0209333	Not significant	YES
AFG3L1	-0.048	0.905443	0.0431391	Not significant	NO
AFG3L2	-0.103	0.799725	0.0970595	Not significant	NO
AFMID	-0.139	0.712079	0.147472	Not significant	NO
AFTPH	0.143	0.729506	0.136971	Not significant	NO
AG2	-1.424	0.101374	0.994072	Not significant	NO
AGA	-0.44	0.319974	0.494886	Not significant	NO
AGAP1	-0.099	0.794343	0.0999919	Not significant	YES
AGAP11	0.011	0.977582	0.00984663	Not significant	NO
AGAP2	-0.297	0.447906	0.348813	Not significant	NO
AGAP3	-0.162	0.674687	0.170898	Not significant	NO
AGAP4	0.004	0.994404	0.00243725	Not significant	NO
AGAP5	-0.012	0.975802	0.0106382	Not significant	NO
AGAP6	-0.067	0.858203	0.06641	Not significant	NO
AGAP7	-0.099	0.77777	0.109149	Not significant	NO
AGAP8	-0.289	0.473338	0.324829	Not significant	NO
AGBL2	-0.195	0.602555	0.220003	Not significant	NO
AGBL3	-0.197	0.597647	0.223556	Not significant	YES
AGBL5	0.093	0.817349	0.0875924	Not significant	NO
AGER	-0.721	0.234187	0.630437	Not significant	NO
AGFG1	0.44	0.265334	0.576208	Not significant	YES
AGFG2	-0.673	0.183833	0.735576	Not significant	NO
AGGF1	-0.199	0.611745	0.21343	Not significant	NO
AGK	-0.244	0.520799	0.28333	Not significant	NO
AGL	0.37	0.35654	0.447892	Not significant	YES
AGMAT	-0.216	0.563369	0.249207	Not significant	NO
AGPAT1	0.051	0.912195	0.0399123	Not significant	NO
AGPAT2	-0.079	0.829623	0.081119	Not significant	NO
AGPAT3	-0.104	0.800486	0.0966461	Not significant	NO
AGPAT4	-0.161	0.654981	0.183771	Not significant	YES
AGPAT5	-0.23	0.536407	0.270506	Not significant	NO
AGPAT6	-0.071	0.855202	0.0679313	Not significant	YES
AGPAT9	0.078	0.825185	0.0834485	Not significant	YES
AGPHD1	0.039	0.920912	0.0357819	Not significant	NO
AGPS	0.294	0.431643	0.364875	Not significant	YES
AGR3	-0.729	0.234272	0.630279	Not significant	NO
AGRN	0.072	0.846448	0.0723998	Not significant	NO
AGTPBP1	-0.03	0.944302	0.0248892	Not significant	YES
AGTRAP	0.001	0.998444	0.000676176	Not significant	YES
AGXT2L2	-0.177	0.639409	0.194221	Not significant	NO
AHCTF1	0.033	0.941299	0.0262726	Not significant	YES
AHCY	0.076	0.846147	0.0725544	Not significant	NO
AHCYL1	0.024	0.958459	0.0184263	Not significant	NO
AHCYL2	-1.212	0.132259	0.878574	Not significant	NO
AHDC1	-0.42	0.317198	0.498669	Not significant	NO
AHI1	-0.061	0.883763	0.0536644	Not significant	YES
AHNAK	0.32	0.428329	0.368223	Not significant	NO
AHNAK2	0.041	0.912934	0.0395606	Not significant	NO
AHR	-0.559	0.261238	0.582964	Not significant	NO
AHRR	0.12	0.735276	0.13355	Not significant	YES
AHSA1	0.088	0.832564	0.0795824	Not significant	NO
AHSA2	-0.023	0.950448	0.0220717	Not significant	YES
AIDA	-0.136	0.736772	0.132667	Not significant	NO
AIF1	-0.247	0.511869	0.290841	Not significant	NO
AIF1L	0.09	0.79766	0.098182	Not significant	NO
AIFM1	-0.053	0.905865	0.0429366	Not significant	NO
AIFM2	0.189	0.604606	0.218528	Not significant	YES
AIG1	-0.173	0.646127	0.189682	Not significant	NO
AIM1	-0.033	0.932596	0.0303064	Not significant	NO
AIM1L	0.517	0.319974	0.494886	Not significant	NO
AIM2	-0.233	0.549282	0.260205	Not significant	NO
AIMP1	0.142	0.730335	0.136478	Not significant	NO
AIMP2	0.176	0.640477	0.193496	Not significant	NO
AIP	-0.045	0.919883	0.0362676	Not significant	YES
AK1	-0.409	0.353215	0.451961	Not significant	NO
AK2	-0.17	0.657653	0.182003	Not significant	YES
AK3	-0.088	0.831254	0.0802665	Not significant	NO
AK3L1	0.076	0.829293	0.0812918	Not significant	NO
AK7	-0.068	0.847763	0.0717256	Not significant	NO
AKAP1	-0.44	0.273845	0.562495	Not significant	NO
AKAP10	-0.041	0.928579	0.0321811	Not significant	YES
AKAP11	0.263	0.483292	0.31579	Not significant	YES
AKAP13	0.129	0.725311	0.139476	Not significant	NO
AKAP2	0.085	0.812198	0.0903381	Not significant	NO
AKAP3	-0.133	0.710637	0.148352	Not significant	NO
AKAP5	0.019	0.961616	0.0169982	Not significant	YES
AKAP6	-0.786	0.204061	0.690239	Not significant	YES
AKAP7	0.029	0.942154	0.0258783	Not significant	YES
AKAP8	0.001	0.998423	0.000685614	Not significant	YES
AKAP8L	-0.019	0.96373	0.0160446	Not significant	NO
AKAP9	-0.088	0.824805	0.0836485	Not significant	NO
AKD1	-0.274	0.47407	0.324157	Not significant	NO
AKIRIN1	0.384	0.308387	0.510904	Not significant	NO
AKIRIN2	0.003	0.995987	0.00174619	Not significant	YES
AKNA	-0.139	0.709739	0.148901	Not significant	NO
AKR1A1	-0.376	0.324589	0.488666	Not significant	NO
AKR1B1	-0.115	0.745375	0.127625	Not significant	NO
AKR1B10	-0.235	0.512166	0.290589	Not significant	NO
AKR1C1	-0.028	0.938816	0.0274196	Not significant	NO
AKR1C2	-0.317	0.43236	0.364154	Not significant	YES
AKR1C3	0.056	0.877202	0.0569004	Not significant	NO
AKR1E2	-0.018	0.960546	0.0174817	Not significant	NO
AKR7A2	-0.311	0.407306	0.390079	Not significant	YES
AKR7A3	-0.627	0.261107	0.583181	Not significant	NO
AKR7L	-0.354	0.420428	0.376308	Not significant	YES
AKT1	-0.26	0.488278	0.311333	Not significant	NO
AKT1S1	0.059	0.894269	0.0485319	Not significant	NO
AKT2	0.36	0.338169	0.470866	Not significant	NO
AKT3	0.198	0.587669	0.230867	Not significant	YES
AKTIP	0.137	0.730095	0.13662	Not significant	NO
ALAD	-0.035	0.938816	0.0274196	Not significant	NO
ALAS1	-0.114	0.779412	0.108233	Not significant	NO
ALDH16A1	-0.037	0.932468	0.030366	Not significant	NO
ALDH18A1	-0.017	0.967877	0.0141798	Not significant	NO
ALDH1A3	-0.154	0.66753	0.175529	Not significant	NO
ALDH1B1	-0.226	0.544039	0.26437	Not significant	NO
ALDH1L1	-0.085	0.809011	0.0920458	Not significant	NO
ALDH1L2	-0.018	0.961538	0.0170336	Not significant	NO
ALDH3A1	-0.806	0.191132	0.718666	Not significant	NO
ALDH3A2	-0.182	0.617678	0.209238	Not significant	YES
ALDH3B1	-0.245	0.522543	0.281878	Not significant	NO
ALDH3B2	-0.008	0.983725	0.00712636	Not significant	NO
ALDH4A1	0.103	0.783795	0.105798	Not significant	NO
ALDH5A1	-0.024	0.950448	0.0220717	Not significant	NO
ALDH6A1	-0.16	0.658504	0.181441	Not significant	NO
ALDH7A1	-0.089	0.8211	0.0856037	Not significant	NO
ALDH8A1	-0.034	0.929781	0.0316193	Not significant	NO
ALDH9A1	-0.057	0.8964	0.0474979	Not significant	NO
ALDOA	0.124	0.74033	0.130575	Not significant	NO
ALDOB	-0.793	0.178581	0.748165	Not significant	NO
ALDOC	-0.085	0.810063	0.091481	Not significant	NO
ALG1	-0.236	0.531403	0.274576	Not significant	NO
ALG10	0.334	0.385706	0.413744	Not significant	YES
ALG10B	0.066	0.876181	0.0574063	Not significant	NO
ALG11	0.315	0.414379	0.382602	Not significant	NO
ALG12	-0.274	0.467269	0.330433	Not significant	NO
ALG13	-0.111	0.786083	0.104532	Not significant	YES
ALG14	-0.068	0.872631	0.0591695	Not significant	YES
ALG1L	-0.184	0.620343	0.207368	Not significant	NO
ALG2	0.087	0.83849	0.0765022	Not significant	NO
ALG3	0.187	0.622848	0.205618	Not significant	NO
ALG5	0.033	0.937002	0.0282596	Not significant	NO
ALG6	0.064	0.882986	0.0540464	Not significant	YES
ALG8	0.177	0.646157	0.189662	Not significant	NO
ALG9	0.033	0.940868	0.0264715	Not significant	NO
ALKBH1	0.082	0.850497	0.0703271	Not significant	NO
ALKBH2	0.027	0.948123	0.0231353	Not significant	NO
ALKBH3	-0.747	0.131703	0.880405	Not significant	NO
ALKBH4	-0.25	0.505424	0.296345	Not significant	NO
ALKBH5	-0.248	0.512681	0.290153	Not significant	NO
ALKBH6	0.137	0.712079	0.147472	Not significant	NO
ALKBH7	-0.16	0.664113	0.177758	Not significant	NO
ALKBH8	0.064	0.875747	0.0576212	Not significant	YES
ALMS1	0	0.999262	0.000320608	Not significant	NO
ALOX12P2	0.022	0.952691	0.0210478	Not significant	NO
ALOX5	0.156	0.663429	0.178205	Not significant	NO
ALOX5AP	-0.657	0.239852	0.620056	Not significant	NO
ALOXE3	0.479	0.338895	0.469935	Not significant	NO
ALPK1	-0.068	0.869905	0.0605281	Not significant	NO
ALPK2	-0.083	0.812201	0.0903367	Not significant	NO
ALPK3	0.063	0.860869	0.065063	Not significant	YES
ALPL	-1.232	0.137123	0.862889	Not significant	NO
ALS2	0.017	0.968604	0.0138535	Not significant	NO
ALS2CL	0.106	0.761596	0.118275	Not significant	NO
ALS2CR11	-0.357	0.418572	0.378229	Not significant	NO
ALS2CR4	0.112	0.774585	0.110931	Not significant	NO
ALS2CR8	-0.16	0.668049	0.175192	Not significant	NO
ALX3	0.073	0.835481	0.0780634	Not significant	NO
AMBRA1	-0.106	0.799725	0.0970595	Not significant	NO
AMD1	-0.109	0.789629	0.102577	Not significant	YES
AMDHD2	-0.127	0.735671	0.133317	Not significant	NO
AMFR	0.161	0.677119	0.169335	Not significant	NO
AMHR2	-0.386	0.380342	0.419825	Not significant	NO
AMICA1	-0.629	0.245154	0.610561	Not significant	NO
AMIGO1	-0.102	0.77673	0.10973	Not significant	YES
AMIGO3	-0.074	0.844387	0.0734585	Not significant	NO
AMMECR1	0.156	0.687612	0.162657	Not significant	NO
AMMECR1L	0.331	0.355	0.449772	Not significant	YES
AMN	-0.163	0.656114	0.183021	Not significant	NO
AMN1	-0.052	0.898856	0.0463097	Not significant	NO
AMOT	0.017	0.963303	0.016237	Not significant	NO
AMOTL1	0.279	0.470161	0.327753	Not significant	NO
AMOTL2	0.413	0.326015	0.486762	Not significant	NO
AMPD1	-0.412	0.371117	0.430489	Not significant	NO
AMPD2	-0.146	0.716669	0.144681	Not significant	NO
AMPD3	-0.156	0.679556	0.167775	Not significant	NO
AMPH	-0.214	0.573328	0.241596	Not significant	NO
AMT	-0.35	0.412787	0.384274	Not significant	NO
AMY2A	-0.852	0.179308	0.7464	Not significant	NO
AMY2B	-0.54	0.305028	0.51566	Not significant	NO
AMZ2	-0.167	0.675552	0.170341	Not significant	YES
AMZ2P1	-0.416	0.307146	0.512655	Not significant	NO
ANAPC1	0.301	0.423604	0.37304	Not significant	YES
ANAPC10	-0.011	0.981549	0.00808817	Not significant	YES
ANAPC11	0.027	0.947137	0.0235871	Not significant	YES
ANAPC13	-0.155	0.701216	0.154148	Not significant	NO
ANAPC16	-0.073	0.863489	0.0637432	Not significant	NO
ANAPC2	0.223	0.55953	0.252177	Not significant	NO
ANAPC4	0.141	0.730611	0.136314	Not significant	NO
ANAPC5	0.054	0.905806	0.0429647	Not significant	NO
ANAPC7	-0.034	0.940868	0.0264715	Not significant	NO
ANG	-0.339	0.418181	0.378636	Not significant	YES
ANGEL1	-0.127	0.748845	0.125608	Not significant	YES
ANGEL2	-0.263	0.483292	0.31579	Not significant	NO
ANGPT1	-0.061	0.865478	0.0627437	Not significant	NO
ANGPT2	-0.17	0.641801	0.1926	Not significant	NO
ANGPTL1	-0.141	0.693567	0.158911	Not significant	NO
ANGPTL2	-0.18	0.622401	0.20593	Not significant	NO
ANGPTL4	-0.245	0.534248	0.272257	Not significant	YES
ANGPTL6	-0.328	0.437531	0.358991	Not significant	NO
ANK2	-0.062	0.863489	0.0637432	Not significant	YES
ANK3	0.09	0.799313	0.0972832	Not significant	NO
ANKAR	-0.149	0.68987	0.161233	Not significant	NO
ANKDD1A	0.289	0.445174	0.35147	Not significant	NO
ANKFN1	0.352	0.420758	0.375968	Not significant	NO
ANKFY1	0.247	0.514332	0.288756	Not significant	YES
ANKH	-0.281	0.462561	0.334831	Not significant	NO
ANKHD1	-0.051	0.90707	0.0423591	Not significant	NO
ANKHD1-EIF4EBP3	-0.87	0.133844	0.8734	Not significant	NO
ANKIB1	-0.105	0.794071	0.10014	Not significant	YES
ANKK1	-0.119	0.73726	0.132379	Not significant	NO
ANKLE1	0.002	0.997089	0.00126591	Not significant	NO
ANKLE2	0.031	0.9434	0.025304	Not significant	NO
ANKMY1	-0.375	0.352231	0.453172	Not significant	NO
ANKMY2	0.238	0.524387	0.280348	Not significant	NO
ANKRA2	-0.336	0.370379	0.431354	Not significant	NO
ANKRD10	-0.145	0.70119	0.154164	Not significant	NO
ANKRD11	0.122	0.7591	0.119701	Not significant	NO
ANKRD12	-0.169	0.658467	0.181466	Not significant	YES
ANKRD13A	0.006	0.991435	0.00373595	Not significant	NO
ANKRD13B	-0.419	0.352094	0.453341	Not significant	NO
ANKRD13C	0.033	0.942964	0.0255048	Not significant	NO
ANKRD13D	0.028	0.948363	0.0230255	Not significant	NO
ANKRD16	-0.07	0.864641	0.0631643	Not significant	NO
ANKRD17	0.064	0.883763	0.0536644	Not significant	NO
ANKRD19	-0.173	0.639409	0.194221	Not significant	NO
ANKRD20A3	-0.225	0.559303	0.252353	Not significant	NO
ANKRD20B	-0.468	0.338169	0.470866	Not significant	NO
ANKRD22	-0.106	0.75995	0.119215	Not significant	NO
ANKRD23	0.169	0.642512	0.192119	Not significant	YES
ANKRD24	-0.333	0.435393	0.361119	Not significant	NO
ANKRD26	-0.001	0.998253	0.000759203	Not significant	NO
ANKRD27	0.589	0.176735	0.752677	Not significant	YES
ANKRD28	-0.083	0.842807	0.0742718	Not significant	YES
ANKRD29	-0.809	0.21079	0.67615	Not significant	NO
ANKRD32	-0.023	0.953073	0.0208737	Not significant	NO
ANKRD34A	-0.158	0.661024	0.179783	Not significant	NO
ANKRD35	-0.288	0.471822	0.326222	Not significant	NO
ANKRD36	0.14	0.700632	0.15451	Not significant	NO
ANKRD36B	0.157	0.661368	0.179557	Not significant	NO
ANKRD36BP1	-0.025	0.950358	0.0221126	Not significant	NO
ANKRD37	-0.492	0.31092	0.507352	Not significant	NO
ANKRD39	-0.008	0.986639	0.00584157	Not significant	NO
ANKRD40	-0.255	0.498224	0.302575	Not significant	NO
ANKRD42	-0.026	0.952085	0.0213241	Not significant	NO
ANKRD43	0.422	0.370379	0.431354	Not significant	NO
ANKRD44	-0.385	0.37326	0.427988	Not significant	YES
ANKRD45	-0.34	0.43236	0.364154	Not significant	NO
ANKRD46	0.166	0.65632	0.182884	Not significant	NO
ANKRD49	0.223	0.557391	0.25384	Not significant	NO
ANKRD5	-0.079	0.838834	0.0763241	Not significant	NO
ANKRD50	-0.339	0.383532	0.416198	Not significant	YES
ANKRD52	0.139	0.715323	0.145498	Not significant	NO
ANKRD53	0.138	0.700982	0.154293	Not significant	NO
ANKRD54	-0.168	0.662641	0.178722	Not significant	NO
ANKRD56	-0.001	0.997958	0.00088752	Not significant	NO
ANKRD57	0.061	0.875747	0.0576212	Not significant	NO
ANKRD58	-0.075	0.834052	0.0788068	Not significant	NO
ANKRD6	-0.007	0.987345	0.00553116	Not significant	NO
ANKRD9	-0.081	0.822209	0.0850179	Not significant	NO
ANKS1B	0.051	0.890781	0.0502291	Not significant	YES
ANKS3	-0.026	0.948932	0.0227648	Not significant	NO
ANKS6	-0.019	0.964102	0.0158769	Not significant	YES
ANKZF1	-0.006	0.991435	0.00373595	Not significant	NO
ANLN	0.315	0.445817	0.350844	Not significant	YES
ANO1	0.057	0.87503	0.0579772	Not significant	NO
ANO10	-0.295	0.429741	0.366794	Not significant	YES
ANO2	0.286	0.477027	0.321457	Not significant	NO
ANO5	-0.193	0.605032	0.218221	Not significant	NO
ANO6	0.126	0.746959	0.126703	Not significant	YES
ANO7	-0.008	0.983741	0.00711942	Not significant	NO
ANO8	-0.033	0.934075	0.0296182	Not significant	NO
ANO9	-0.043	0.909756	0.0410752	Not significant	NO
ANP32A	0.56	0.147076	0.832459	Not significant	NO
ANP32B	0.205	0.597647	0.223556	Not significant	NO
ANP32C	0.029	0.938198	0.0277057	Not significant	NO
ANP32E	0.075	0.838213	0.0766457	Not significant	NO
ANTXR1	-0.128	0.717599	0.144118	Not significant	YES
ANUBL1	-0.088	0.832161	0.0797928	Not significant	NO
ANXA1	-0.065	0.856041	0.0675052	Not significant	NO
ANXA11	0.026	0.954366	0.0202851	Not significant	YES
ANXA2	0.372	0.361105	0.442366	Not significant	YES
ANXA2P1	0.243	0.518825	0.284979	Not significant	NO
ANXA2P2	0.407	0.337694	0.471477	Not significant	NO
ANXA2P3	0.048	0.895362	0.0480015	Not significant	NO
ANXA3	0.002	0.996661	0.00145236	Not significant	NO
ANXA4	0.011	0.977533	0.00986861	Not significant	NO
ANXA5	-0.186	0.630463	0.200341	Not significant	YES
ANXA6	-0.574	0.207048	0.68393	Not significant	NO
ANXA7	0.322	0.380342	0.419825	Not significant	YES
ANXA8	0.353	0.41474	0.382224	Not significant	NO
ANXA9	0.245	0.523849	0.280794	Not significant	NO
AOAH	-0.295	0.463993	0.333488	Not significant	NO
AOC3	-1.751	0.0706092	1.15114	Not significant	NO
AP1AR	0.02	0.963496	0.0161499	Not significant	NO
AP1B1	-0.114	0.782558	0.106484	Not significant	NO
AP1G1	0.111	0.791759	0.101407	Not significant	YES
AP1G2	-0.121	0.74406	0.128392	Not significant	NO
AP1M1	-0.202	0.604606	0.218528	Not significant	NO
AP1M2	0.29	0.44059	0.355965	Not significant	NO
AP1S1	-0.165	0.658504	0.181441	Not significant	NO
AP1S2	-0.24	0.517116	0.286412	Not significant	NO
AP1S3	-0.192	0.600243	0.221673	Not significant	NO
AP2A1	0.577	0.146026	0.83557	Not significant	NO
AP2A2	-0.19	0.629164	0.201236	Not significant	YES
AP2B1	-0.171	0.658782	0.181259	Not significant	NO
AP2M1	0.215	0.572816	0.241985	Not significant	NO
AP2S1	0.92	0.072845	1.1376	Not significant	NO
AP3B1	-0.061	0.893618	0.0488479	Not significant	NO
AP3B2	0.014	0.968118	0.0140718	Not significant	YES
AP3D1	-0.297	0.426665	0.369913	Not significant	NO
AP3M1	0.444	0.221113	0.655386	Not significant	YES
AP3M2	-0.014	0.97329	0.011758	Not significant	YES
AP3S1	-0.146	0.714912	0.145747	Not significant	NO
AP3S2	0.084	0.838897	0.0762912	Not significant	NO
AP4B1	-0.394	0.311148	0.507033	Not significant	YES
AP4M1	-0.159	0.682462	0.165921	Not significant	NO
AP4S1	-0.117	0.75428	0.122467	Not significant	YES
APAF1	0.204	0.599045	0.22254	Not significant	YES
APBA1	-0.072	0.844387	0.0734585	Not significant	NO
APBA2	-0.107	0.758711	0.119924	Not significant	YES
APBA3	-0.553	0.186642	0.728992	Not significant	NO
APBB1	-0.127	0.724771	0.139799	Not significant	NO
APBB1IP	-0.069	0.85033	0.0704123	Not significant	NO
APBB2	0.332	0.387122	0.412153	Not significant	NO
APBB3	-0.115	0.74991	0.124991	Not significant	NO
APC	-0.067	0.874638	0.0581715	Not significant	NO
APC2	-0.093	0.791674	0.101453	Not significant	NO
APCDD1	0.125	0.725311	0.139476	Not significant	NO
APEH	-0.102	0.808293	0.0924311	Not significant	NO
APEX1	-0.363	0.343638	0.463899	Not significant	NO
APEX2	-0.022	0.961616	0.0169982	Not significant	NO
APH1A	-0.136	0.73726	0.132379	Not significant	NO
APH1B	0.995	0.103177	0.986419	Not significant	NO
API5	-0.143	0.728039	0.137845	Not significant	NO
APIP	-0.133	0.734038	0.134281	Not significant	NO
APITD1	0.056	0.894278	0.0485274	Not significant	NO
APLF	-0.06	0.882533	0.0542688	Not significant	YES
APLN	-0.328	0.434728	0.361783	Not significant	NO
APLP1	-0.028	0.940124	0.0268148	Not significant	NO
APLP2	-0.067	0.866424	0.0622695	Not significant	NO
APOA1BP	-0.113	0.759649	0.119387	Not significant	NO
APOB48R	-0.365	0.385705	0.413745	Not significant	NO
APOBEC3A	0.115	0.745178	0.12774	Not significant	NO
APOBEC3B	0.168	0.646235	0.189609	Not significant	NO
APOBEC3C	0.019	0.961616	0.0169982	Not significant	NO
APOBEC3D	0.056	0.883751	0.0536699	Not significant	NO
APOBEC3F	-0.039	0.922687	0.0349454	Not significant	NO
APOBEC3G	-0.068	0.853049	0.0690263	Not significant	NO
APOBEC3H	-0.186	0.614557	0.211438	Not significant	NO
APOC1	-0.12	0.734057	0.13427	Not significant	NO
APOC2	-0.324	0.445174	0.35147	Not significant	NO
APOD	0.008	0.985627	0.00628743	Not significant	NO
APOE	-0.08	0.821069	0.0856202	Not significant	NO
APOH	-1.766	0.0706092	1.15114	Not significant	NO
APOL1	0.097	0.781091	0.107299	Not significant	YES
APOL2	0.114	0.757821	0.120433	Not significant	YES
APOL3	0.074	0.837003	0.0772728	Not significant	YES
APOL4	-0.015	0.967086	0.014535	Not significant	YES
APOL6	0.1	0.790344	0.102184	Not significant	YES
APOLD1	-0.25	0.505424	0.296345	Not significant	YES
APOO	-0.018	0.964959	0.0154913	Not significant	NO
APOOL	-0.047	0.910993	0.0404851	Not significant	NO
APP	-0.084	0.832161	0.0797928	Not significant	NO
APPBP2	-0.56	0.128852	0.889909	Not significant	YES
APPL1	0.077	0.861363	0.0648135	Not significant	NO
APPL2	0.046	0.916629	0.0378065	Not significant	NO
APRT	0.053	0.89602	0.0476822	Not significant	NO
APTX	-0.06	0.893563	0.0488748	Not significant	YES
AQP1	-1.762	0.0860615	1.06519	Not significant	NO
AQP11	0.075	0.836818	0.0773692	Not significant	NO
AQP5	-1.746	0.0818056	1.08722	Not significant	NO
AQP6	-0.302	0.456851	0.340226	Not significant	NO
AQP7	-0.663	0.251688	0.599137	Not significant	YES
AQP9	-0.199	0.593065	0.226898	Not significant	YES
AQR	0.242	0.524105	0.280581	Not significant	NO
AR	-0.25	0.52702	0.278173	Not significant	YES
ARAF	-0.213	0.582077	0.235019	Not significant	NO
ARAP1	-0.18	0.64293	0.191836	Not significant	NO
ARAP2	0.147	0.688094	0.162352	Not significant	NO
ARAP3	-0.119	0.7522	0.123667	Not significant	NO
ARC	-1.29	0.121882	0.914059	Not significant	NO
ARCN1	0.281	0.452986	0.343915	Not significant	YES
AREG	-1.116	0.151975	0.818228	Not significant	NO
ARF1	-0.175	0.658504	0.181441	Not significant	NO
ARF3	0.406	0.274902	0.560822	Not significant	YES
ARF4	-0.078	0.85433	0.0683742	Not significant	NO
ARF5	-0.216	0.564541	0.248305	Not significant	NO
ARF6	-0.13	0.750373	0.124723	Not significant	YES
ARFGAP1	-0.181	0.633847	0.198015	Not significant	NO
ARFGAP2	-0.255	0.494927	0.305458	Not significant	NO
ARFGAP3	-0.057	0.897971	0.0467376	Not significant	NO
ARFGEF1	-0.091	0.820388	0.085981	Not significant	NO
ARFGEF2	-0.16	0.685777	0.163817	Not significant	YES
ARFIP1	-0.315	0.39388	0.404636	Not significant	NO
ARFIP2	-0.203	0.59316	0.226828	Not significant	NO
ARFRP1	-0.391	0.323039	0.490745	Not significant	NO
ARG2	-0.131	0.713756	0.14645	Not significant	NO
ARGLU1	0.018	0.963496	0.0161499	Not significant	NO
ARHGAP1	-0.432	0.251688	0.599137	Not significant	NO
ARHGAP10	0.174	0.63719	0.195731	Not significant	NO
ARHGAP11A	0.316	0.433755	0.362756	Not significant	YES
ARHGAP11B	0.338	0.420134	0.376612	Not significant	NO
ARHGAP12	-0.31	0.410552	0.386632	Not significant	NO
ARHGAP15	-0.236	0.529764	0.275917	Not significant	NO
ARHGAP17	-0.107	0.797291	0.0983831	Not significant	NO
ARHGAP18	-0.431	0.302891	0.518713	Not significant	NO
ARHGAP19	0.396	0.303701	0.517554	Not significant	YES
ARHGAP20	-0.25	0.522543	0.281878	Not significant	NO
ARHGAP21	0.09	0.821164	0.0855701	Not significant	NO
ARHGAP22	-0.079	0.827464	0.0822507	Not significant	YES
ARHGAP23	-0.208	0.56959	0.244438	Not significant	YES
ARHGAP25	-0.342	0.386346	0.413024	Not significant	NO
ARHGAP26	-0.066	0.857756	0.066636	Not significant	YES
ARHGAP27	-0.109	0.774585	0.110931	Not significant	NO
ARHGAP28	1.673	0.0736796	1.13265	Not significant	YES
ARHGAP29	0.141	0.699531	0.155193	Not significant	YES
ARHGAP30	-0.212	0.564259	0.248521	Not significant	NO
ARHGAP31	-0.398	0.35333	0.45182	Not significant	NO
ARHGAP32	-0.092	0.806944	0.0931567	Not significant	YES
ARHGAP33	-0.049	0.895059	0.0481482	Not significant	NO
ARHGAP39	-0.028	0.94304	0.0254697	Not significant	NO
ARHGAP4	-0.005	0.991098	0.00388362	Not significant	NO
ARHGAP42	-0.139	0.702057	0.153627	Not significant	YES
ARHGAP5	-0.121	0.75599	0.121484	Not significant	NO
ARHGAP6	-0.747	0.206855	0.684335	Not significant	YES
ARHGAP8	0.149	0.684886	0.164382	Not significant	NO
ARHGAP9	-0.467	0.315518	0.500976	Not significant	NO
ARHGDIA	0.124	0.758711	0.119924	Not significant	NO
ARHGDIB	-0.16	0.660142	0.180363	Not significant	NO
ARHGEF1	0.081	0.835031	0.0782976	Not significant	NO
ARHGEF10	-0.212	0.564541	0.248305	Not significant	NO
ARHGEF10L	-0.133	0.721893	0.141527	Not significant	NO
ARHGEF11	0.072	0.866014	0.0624752	Not significant	NO
ARHGEF12	0.165	0.667876	0.175304	Not significant	NO
ARHGEF16	0.229	0.537908	0.269292	Not significant	YES
ARHGEF17	-0.184	0.624394	0.204541	Not significant	YES
ARHGEF18	0.434	0.268578	0.57093	Not significant	NO
ARHGEF19	-1.074	0.122693	0.911181	Not significant	YES
ARHGEF2	-0.105	0.780677	0.107529	Not significant	NO
ARHGEF3	-0.078	0.853572	0.0687597	Not significant	NO
ARHGEF33	0.199	0.596646	0.224283	Not significant	NO
ARHGEF35	0.066	0.864479	0.0632453	Not significant	YES
ARHGEF37	0.046	0.902903	0.0443587	Not significant	YES
ARHGEF4	0.134	0.709739	0.148901	Not significant	NO
ARHGEF5	0.06	0.886133	0.0525011	Not significant	NO
ARHGEF6	-0.349	0.384776	0.414792	Not significant	NO
ARHGEF7	0.217	0.569114	0.244801	Not significant	NO
ARHGEF9	-0.556	0.206415	0.685258	Not significant	NO
ARID1A	-0.131	0.74033	0.130575	Not significant	NO
ARID1B	0.067	0.879364	0.0558313	Not significant	YES
ARID2	0.256	0.494564	0.305778	Not significant	NO
ARID3A	0.386	0.365073	0.43762	Not significant	NO
ARID3B	0.923	0.119492	0.922662	Not significant	NO
ARID4A	-0.187	0.630461	0.200342	Not significant	YES
ARID4B	-0.174	0.660521	0.180113	Not significant	NO
ARID5A	-0.159	0.67307	0.17194	Not significant	NO
ARID5B	-0.022	0.959676	0.0178753	Not significant	NO
ARIH1	0.704	0.0797707	1.09816	Not significant	NO
ARIH2	-0.059	0.896913	0.0472496	Not significant	NO
ARL1	0.008	0.986859	0.00574475	Not significant	NO
ARL10	-0.079	0.825295	0.0833908	Not significant	NO
ARL11	0.429	0.338193	0.470835	Not significant	YES
ARL13B	-0.092	0.821164	0.0855701	Not significant	NO
ARL15	-0.21	0.571843	0.242723	Not significant	NO
ARL16	0.036	0.9333	0.0299788	Not significant	NO
ARL17A	0.005	0.991994	0.00349092	Not significant	NO
ARL2	0.058	0.894029	0.0486485	Not significant	NO
ARL2BP	0.124	0.75938	0.119541	Not significant	YES
ARL3	0.052	0.905257	0.0432279	Not significant	NO
ARL4A	-0.053	0.893563	0.0488748	Not significant	NO
ARL4C	-0.447	0.314696	0.502109	Not significant	NO
ARL4D	-0.095	0.787918	0.103519	Not significant	NO
ARL5A	-0.046	0.920116	0.0361572	Not significant	NO
ARL5B	-0.02	0.960054	0.0177045	Not significant	NO
ARL6	-0.139	0.713052	0.146879	Not significant	NO
ARL6IP1	0.087	0.831503	0.0801362	Not significant	NO
ARL6IP4	-0.096	0.812198	0.0903381	Not significant	NO
ARL6IP5	-0.17	0.650005	0.187083	Not significant	YES
ARL6IP6	0.399	0.324589	0.488666	Not significant	NO
ARL8A	-0.018	0.967383	0.0144014	Not significant	NO
ARL8B	-0.139	0.733999	0.134304	Not significant	YES
ARL9	-0.664	0.239431	0.62082	Not significant	NO
ARMC1	-0.001	0.998423	0.000685614	Not significant	NO
ARMC10	-0.397	0.31092	0.507352	Not significant	YES
ARMC2	-0.095	0.789472	0.102663	Not significant	NO
ARMC3	-0.551	0.301061	0.521346	Not significant	NO
ARMC5	-0.371	0.343871	0.463605	Not significant	NO
ARMC6	-0.175	0.651261	0.186245	Not significant	NO
ARMC7	0.079	0.845474	0.0728999	Not significant	NO
ARMC8	0.212	0.585839	0.232221	Not significant	YES
ARMC9	-0.209	0.567919	0.245713	Not significant	NO
ARMCX1	0.204	0.576571	0.239147	Not significant	NO
ARMCX2	0.174	0.635169	0.19711	Not significant	NO
ARMCX3	0.037	0.934611	0.0293692	Not significant	NO
ARMCX5	-0.178	0.653434	0.184798	Not significant	NO
ARMCX6	0.079	0.844703	0.0732959	Not significant	NO
ARNT	0.034	0.940868	0.0264715	Not significant	NO
ARNT2	-0.088	0.801101	0.0963127	Not significant	YES
ARNTL	-0.378	0.34298	0.464731	Not significant	NO
ARNTL2	0.098	0.779457	0.108208	Not significant	YES
ARPC1A	-0.223	0.548776	0.260605	Not significant	NO
ARPC1B	-0.18	0.629518	0.200992	Not significant	NO
ARPC2	0.092	0.829061	0.0814135	Not significant	NO
ARPC3	0.057	0.895362	0.0480015	Not significant	YES
ARPC4	-0.147	0.716	0.145087	Not significant	NO
ARPC5	0.235	0.534834	0.271781	Not significant	NO
ARPC5L	0.073	0.865193	0.0628872	Not significant	NO
ARPM1	0.236	0.523903	0.280749	Not significant	NO
ARPP19	0.036	0.938764	0.0274434	Not significant	NO
ARRB1	-0.004	0.99455	0.00237332	Not significant	NO
ARRB2	-0.303	0.420428	0.376308	Not significant	NO
ARRDC1	0.328	0.38671	0.412614	Not significant	NO
ARRDC2	-0.321	0.404338	0.393255	Not significant	NO
ARRDC3	-0.402	0.348188	0.458186	Not significant	NO
ARRDC4	0.132	0.714521	0.145985	Not significant	YES
ARRDC5	-0.163	0.653432	0.1848	Not significant	NO
ARSA	-0.104	0.779412	0.108233	Not significant	NO
ARSB	-0.026	0.951545	0.0215707	Not significant	YES
ARSD	-0.279	0.467269	0.330433	Not significant	NO
ARSE	-0.707	0.240277	0.619288	Not significant	YES
ARSG	-0.006	0.989978	0.0043744	Not significant	YES
ARSI	-0.072	0.838897	0.0762912	Not significant	NO
ARSJ	-1.569	0.0829223	1.08133	Not significant	YES
ARSK	0.113	0.771163	0.112854	Not significant	NO
ARV1	-0.271	0.471663	0.326368	Not significant	NO
ARVCF	-0.127	0.722128	0.141386	Not significant	NO
ARX	-0.55	0.291919	0.534737	Not significant	NO
AS3MT	0.13	0.714521	0.145985	Not significant	NO
ASAH1	-0.022	0.956722	0.019214	Not significant	YES
ASAH2	0.021	0.955495	0.0197714	Not significant	YES
ASAH2B	0.103	0.768874	0.114145	Not significant	YES
ASAM	-0.007	0.986173	0.00604706	Not significant	NO
ASAP1	0.084	0.828491	0.081712	Not significant	NO
ASAP2	0.612	0.253047	0.596799	Not significant	NO
ASAP3	0.122	0.735046	0.133685	Not significant	NO
ASB13	-0.157	0.691752	0.16005	Not significant	NO
ASB14	-0.298	0.452965	0.343936	Not significant	NO
ASB16	-0.232	0.539052	0.26837	Not significant	NO
ASB3	-0.191	0.629433	0.201051	Not significant	NO
ASB6	0.038	0.934574	0.0293864	Not significant	YES
ASB7	0.405	0.26513	0.576541	Not significant	NO
ASB8	-0.056	0.905236	0.043238	Not significant	YES
ASB9	-0.146	0.68422	0.164804	Not significant	NO
ASCC1	0.053	0.906415	0.0426732	Not significant	YES
ASCC2	-0.131	0.738204	0.131824	Not significant	NO
ASCC3	0.005	0.991667	0.00363406	Not significant	NO
ASCL2	0.166	0.650141	0.186992	Not significant	NO
ASF1A	0.013	0.976454	0.0103481	Not significant	YES
ASF1B	0.16	0.65632	0.182884	Not significant	NO
ASH1L	0.061	0.883713	0.0536886	Not significant	NO
ASH2L	0.096	0.80745	0.0928842	Not significant	NO
ASL	-0.792	0.146319	0.834698	Not significant	NO
ASMTL	-0.434	0.289436	0.538447	Not significant	NO
ASNA1	-0.11	0.781513	0.107064	Not significant	NO
ASNS	-0.106	0.763591	0.117139	Not significant	NO
ASNSD1	-0.28	0.453661	0.343268	Not significant	NO
ASPA	-0.009	0.98106	0.0083046	Not significant	YES
ASPH	0.018	0.961538	0.0170336	Not significant	NO
ASPHD1	-0.823	0.207386	0.683221	Not significant	NO
ASPHD2	-0.093	0.793276	0.100576	Not significant	YES
ASPM	0.398	0.373036	0.42825	Not significant	NO
ASPRV1	0.047	0.906541	0.0426125	Not significant	NO
ASPSCR1	-0.011	0.979269	0.0090979	Not significant	NO
ASRGL1	-0.05	0.893172	0.0490647	Not significant	YES
ASS1	-0.032	0.933465	0.0299018	Not significant	NO
ASTE1	-0.148	0.715896	0.14515	Not significant	NO
ASTN2	-0.136	0.704312	0.152235	Not significant	NO
ASXL1	0.354	0.34114	0.467067	Not significant	NO
ASXL2	0.06	0.878263	0.0563752	Not significant	YES
ATAD1	0.491	0.19284	0.714804	Not significant	YES
ATAD2	0.003	0.99556	0.00193247	Not significant	NO
ATAD2B	0.14	0.723734	0.140421	Not significant	NO
ATAD3A	0.099	0.797024	0.0985284	Not significant	NO
ATAD3B	0.008	0.986173	0.00604706	Not significant	NO
ATAD3C	-0.267	0.494927	0.305458	Not significant	NO
ATAD5	0.139	0.701246	0.15413	Not significant	NO
ATE1	0.211	0.566377	0.246894	Not significant	YES
ATF1	0.87	0.0885334	1.05289	Not significant	NO
ATF2	-0.012	0.98085	0.0083976	Not significant	NO
ATF3	-0.004	0.992625	0.00321464	Not significant	YES
ATF4	-0.05	0.909437	0.0412274	Not significant	NO
ATF5	-0.041	0.920565	0.0359455	Not significant	NO
ATF6	0.098	0.813597	0.0895907	Not significant	YES
ATF6B	-0.01	0.983725	0.00712619	Not significant	NO
ATF7	0.037	0.937106	0.0282114	Not significant	NO
ATF7IP	0.049	0.909756	0.0410752	Not significant	NO
ATF7IP2	-0.214	0.561422	0.25071	Not significant	NO
ATG10	-0.053	0.900214	0.0456545	Not significant	YES
ATG12	-0.122	0.76366	0.1171	Not significant	NO
ATG16L1	0.061	0.892348	0.0494655	Not significant	NO
ATG16L2	-0.173	0.635651	0.196781	Not significant	NO
ATG2A	-0.027	0.951545	0.0215707	Not significant	NO
ATG2B	-0.092	0.821418	0.0854355	Not significant	NO
ATG3	-0.191	0.633024	0.19858	Not significant	NO
ATG4A	-0.128	0.748845	0.125608	Not significant	NO
ATG4B	0.002	0.997089	0.00126591	Not significant	NO
ATG4C	0.019	0.966451	0.0148204	Not significant	NO
ATG4D	0.152	0.692944	0.159302	Not significant	NO
ATG5	0.095	0.818246	0.087116	Not significant	NO
ATG7	0.02	0.963743	0.0160386	Not significant	NO
ATG9A	0.136	0.74033	0.130575	Not significant	NO
ATG9B	-0.05	0.891466	0.0498954	Not significant	YES
ATHL1	-0.179	0.630461	0.200342	Not significant	NO
ATIC	0.221	0.562304	0.250029	Not significant	NO
ATL1	-0.247	0.505499	0.29628	Not significant	NO
ATL2	-0.186	0.624731	0.204307	Not significant	NO
ATL3	0.152	0.687691	0.162607	Not significant	YES
ATM	0.017	0.968086	0.0140863	Not significant	NO
ATMIN	0.307	0.404744	0.39282	Not significant	NO
ATN1	-0.007	0.988818	0.00488359	Not significant	NO
ATOX1	-0.058	0.891947	0.0496609	Not significant	NO
ATP10A	-0.194	0.598678	0.222807	Not significant	NO
ATP10D	1.204	0.0811259	1.09084	Not significant	NO
ATP11A	-0.006	0.99002	0.00435596	Not significant	YES
ATP11B	0.34	0.370743	0.430927	Not significant	YES
ATP11C	-0.27	0.474283	0.323963	Not significant	YES
ATP13A1	-0.107	0.794281	0.100026	Not significant	NO
ATP13A2	0.055	0.897621	0.0469068	Not significant	NO
ATP13A3	0.208	0.573737	0.241287	Not significant	NO
ATP1A1	-0.295	0.436742	0.359775	Not significant	NO
ATP1A2	-0.183	0.623945	0.204854	Not significant	NO
ATP1B1	-0.505	0.303883	0.517293	Not significant	NO
ATP1B2	-0.352	0.411509	0.385621	Not significant	NO
ATP1B3	-0.019	0.963303	0.016237	Not significant	YES
ATP2A1	0.027	0.941623	0.0261228	Not significant	NO
ATP2A2	-0.054	0.900214	0.0456545	Not significant	YES
ATP2A3	-0.616	0.262574	0.580748	Not significant	NO
ATP2B1	0.35	0.384776	0.414792	Not significant	NO
ATP2B4	-0.008	0.986205	0.00603284	Not significant	NO
ATP2C1	-0.031	0.942964	0.0255048	Not significant	NO
ATP2C2	-0.481	0.327292	0.485065	Not significant	NO
ATP5A1	-0.258	0.490573	0.309296	Not significant	NO
ATP5B	0.072	0.862082	0.0644514	Not significant	NO
ATP5C1	-0.097	0.8089	0.0921051	Not significant	NO
ATP5D	-0.245	0.508075	0.294072	Not significant	NO
ATP5E	-0.315	0.407336	0.390047	Not significant	NO
ATP5EP2	-0.272	0.479624	0.319099	Not significant	NO
ATP5F1	0.088	0.831254	0.0802665	Not significant	YES
ATP5G1	0.002	0.996986	0.00131106	Not significant	NO
ATP5G2	0.094	0.811955	0.0904681	Not significant	NO
ATP5G3	0.098	0.803357	0.0950914	Not significant	NO
ATP5H	0.065	0.879893	0.0555703	Not significant	NO
ATP5I	0.006	0.99055	0.00412365	Not significant	NO
ATP5J	0.046	0.916378	0.0379255	Not significant	NO
ATP5J2	-0.13	0.718388	0.143641	Not significant	NO
ATP5L	0.081	0.836992	0.0772784	Not significant	NO
ATP5O	0.007	0.987247	0.00557426	Not significant	NO
ATP5S	-0.127	0.73726	0.132379	Not significant	NO
ATP5SL	0.204	0.599366	0.222308	Not significant	NO
ATP6AP1	0.051	0.911823	0.0400894	Not significant	NO
ATP6AP1L	-1.222	0.121388	0.915824	Not significant	NO
ATP6AP2	-0.102	0.810274	0.091368	Not significant	NO
ATP6V0A1	-0.568	0.186844	0.728521	Not significant	NO
ATP6V0A2	-0.007	0.989859	0.00442659	Not significant	NO
ATP6V0A4	0.12	0.735401	0.133476	Not significant	NO
ATP6V0B	-0.132	0.72388	0.140333	Not significant	NO
ATP6V0C	-0.179	0.646157	0.189662	Not significant	NO
ATP6V0D1	-0.225	0.55352	0.256867	Not significant	NO
ATP6V0D2	-0.329	0.440672	0.355884	Not significant	NO
ATP6V0E1	-0.208	0.57773	0.238275	Not significant	NO
ATP6V0E2	-0.172	0.639329	0.194276	Not significant	NO
ATP6V1A	-0.176	0.658467	0.181466	Not significant	NO
ATP6V1B1	0.486	0.335739	0.473999	Not significant	NO
ATP6V1B2	-0.716	0.110315	0.957366	Not significant	NO
ATP6V1C1	-0.068	0.876181	0.0574063	Not significant	NO
ATP6V1C2	0.437	0.357011	0.447318	Not significant	NO
ATP6V1D	0.041	0.931168	0.0309719	Not significant	NO
ATP6V1E1	0.072	0.869685	0.0606381	Not significant	NO
ATP6V1E2	-0.022	0.956307	0.0194026	Not significant	NO
ATP6V1F	-0.232	0.536535	0.270402	Not significant	NO
ATP6V1G1	-0.067	0.87411	0.058434	Not significant	YES
ATP6V1G2	-0.239	0.530903	0.274985	Not significant	NO
ATP6V1H	-0.099	0.810645	0.0911691	Not significant	NO
ATP7A	-0.144	0.707115	0.15051	Not significant	YES
ATP7B	0.776	0.213554	0.670493	Not significant	NO
ATP8A1	-0.461	0.335511	0.474293	Not significant	NO
ATP8A2	-0.099	0.779412	0.108233	Not significant	YES
ATP8B1	-0.136	0.706145	0.151106	Not significant	NO
ATP8B2	-0.234	0.527382	0.277875	Not significant	NO
ATP8B3	0.112	0.751948	0.123812	Not significant	NO
ATP8B4	-0.188	0.604141	0.218862	Not significant	NO
ATP8B5P	0.043	0.916835	0.037709	Not significant	NO
ATP9A	-0.345	0.38025	0.419931	Not significant	YES
ATPAF1	0.175	0.659569	0.18074	Not significant	NO
ATPAF2	-0.027	0.951545	0.0215707	Not significant	YES
ATPBD4	0.221	0.553385	0.256972	Not significant	NO
ATPIF1	-0.031	0.940868	0.0264715	Not significant	YES
ATR	0.028	0.950496	0.0220497	Not significant	NO
ATRIP	0.064	0.888015	0.0515799	Not significant	NO
ATRN	-0.105	0.790344	0.102184	Not significant	YES
ATRX	-0.11	0.781091	0.107299	Not significant	NO
ATXN1	-0.378	0.326015	0.486762	Not significant	NO
ATXN10	-0.041	0.931168	0.0309719	Not significant	NO
ATXN1L	0.181	0.64369	0.191323	Not significant	NO
ATXN2	0.23	0.546028	0.262785	Not significant	NO
ATXN2L	-0.152	0.707115	0.15051	Not significant	NO
ATXN3	0.059	0.895362	0.0480015	Not significant	YES
ATXN7	-0.074	0.858445	0.0662876	Not significant	YES
ATXN7L1	-0.121	0.746957	0.126704	Not significant	NO
ATXN7L2	-0.203	0.581323	0.235582	Not significant	NO
ATXN7L3	-0.104	0.806147	0.093586	Not significant	YES
ATXN7L3B	0.167	0.671375	0.173035	Not significant	NO
AUH	-0.056	0.895362	0.0480015	Not significant	NO
AUP1	0.104	0.798207	0.0978847	Not significant	NO
AURKA	0.145	0.686092	0.163617	Not significant	YES
AURKAIP1	0.025	0.952085	0.0213241	Not significant	NO
AURKAPS1	0.131	0.71442	0.146046	Not significant	NO
AURKB	0.142	0.692597	0.159519	Not significant	NO
AURKC	0.441	0.343684	0.463841	Not significant	NO
AVEN	0.062	0.88191	0.0545759	Not significant	NO
AVL9	-0.003	0.996564	0.00149496	Not significant	YES
AVPI1	0.132	0.711959	0.147545	Not significant	NO
AXIN1	-0.287	0.441618	0.354953	Not significant	NO
AXIN2	-0.746	0.213554	0.670493	Not significant	NO
AXL	-0.247	0.510178	0.292278	Not significant	YES
AZI1	0.048	0.905236	0.043238	Not significant	NO
AZI2	-0.078	0.860869	0.065063	Not significant	YES
AZIN1	-0.176	0.645958	0.189796	Not significant	NO
B2M	0.069	0.857756	0.066636	Not significant	NO
B3GALNT1	-0.017	0.963452	0.0161698	Not significant	NO
B3GALNT2	-0.137	0.727604	0.138105	Not significant	NO
B3GALT2	-0.987	0.167635	0.775634	Not significant	NO
B3GALT4	0.213	0.564731	0.248159	Not significant	NO
B3GALT6	0.09	0.828429	0.081745	Not significant	NO
B3GALTL	0.28	0.455456	0.341553	Not significant	YES
B3GAT1	-0.361	0.413026	0.384022	Not significant	YES
B3GAT2	0.026	0.946744	0.0237673	Not significant	YES
B3GAT3	0.013	0.975802	0.0106382	Not significant	NO
B3GNT1	0.077	0.85045	0.070351	Not significant	NO
B3GNT2	-0.089	0.828193	0.0818685	Not significant	YES
B3GNT3	0.06	0.868662	0.0611492	Not significant	NO
B3GNT4	-0.22	0.565237	0.247769	Not significant	NO
B3GNT5	-0.025	0.948014	0.0231854	Not significant	YES
B3GNT6	-1.518	0.0986729	1.0058	Not significant	NO
B3GNT7	-0.392	0.385132	0.414391	Not significant	NO
B3GNT8	-0.332	0.429741	0.366794	Not significant	NO
B3GNT9	-0.183	0.620182	0.207481	Not significant	NO
B3GNTL1	-0.102	0.786234	0.104448	Not significant	NO
B4GALNT1	0.264	0.508494	0.293714	Not significant	NO
B4GALNT3	-1.868	0.0682985	1.16559	Not significant	NO
B4GALNT4	-0.216	0.571117	0.243275	Not significant	NO
B4GALT1	0.193	0.602555	0.220003	Not significant	YES
B4GALT2	-0.163	0.670686	0.173481	Not significant	NO
B4GALT3	-0.147	0.709409	0.149103	Not significant	NO
B4GALT4	0.215	0.559543	0.252167	Not significant	YES
B4GALT5	0.077	0.847903	0.0716538	Not significant	NO
B4GALT6	-0.063	0.860466	0.0652663	Not significant	NO
B4GALT7	-0.336	0.373955	0.427181	Not significant	YES
B9D1	-0.385	0.355696	0.44892	Not significant	NO
B9D2	0.026	0.950358	0.0221126	Not significant	YES
BAALC	-1.072	0.155463	0.808372	Not significant	NO
BAAT	-1.017	0.15417	0.811999	Not significant	NO
BACE1	-0.11	0.775568	0.11038	Not significant	NO
BACE2	0.083	0.813597	0.0895907	Not significant	NO
BACH1	0.525	0.213647	0.670303	Not significant	YES
BACH2	0.246	0.512405	0.290386	Not significant	NO
BAD	0.047	0.912934	0.0395606	Not significant	NO
BAG1	-0.093	0.801546	0.0960718	Not significant	NO
BAG2	0.136	0.703656	0.152639	Not significant	NO
BAG3	-0.001	0.998253	0.000759203	Not significant	NO
BAG4	0.045	0.911929	0.0400391	Not significant	YES
BAG5	0.15	0.713052	0.146879	Not significant	YES
BAGE2	-0.117	0.74033	0.130575	Not significant	NO
BAHCC1	-0.209	0.567131	0.246317	Not significant	NO
BAHD1	-0.044	0.920565	0.0359455	Not significant	NO
BAI2	0.086	0.808673	0.092227	Not significant	NO
BAI3	-0.338	0.431403	0.365117	Not significant	YES
BAIAP2	0.163	0.653843	0.184527	Not significant	NO
BAIAP2L1	-0.107	0.774585	0.110931	Not significant	NO
BAIAP2L2	-0.474	0.33913	0.469634	Not significant	NO
BAIAP3	-0.371	0.398351	0.399734	Not significant	YES
BAK1	0.157	0.682571	0.165852	Not significant	YES
BAMBI	-0.43	0.365073	0.43762	Not significant	YES
BANF1	0.084	0.834052	0.0788068	Not significant	NO
BANK1	-0.346	0.404744	0.39282	Not significant	NO
BANP	0.345	0.357011	0.447318	Not significant	NO
BAP1	-0.085	0.844289	0.0735088	Not significant	NO
BARD1	0.221	0.549282	0.260205	Not significant	NO
BARX2	-0.598	0.282278	0.549324	Not significant	NO
BASP1	0.796	0.208605	0.680675	Not significant	NO
BAT1	-0.044	0.924314	0.0341805	Not significant	NO
BAT2	0.156	0.691574	0.160161	Not significant	NO
BAT2L1	0.125	0.747533	0.12637	Not significant	NO
BAT2L2	0.123	0.755226	0.121923	Not significant	NO
BAT3	0.037	0.937002	0.0282596	Not significant	NO
BAT4	0.089	0.832564	0.0795824	Not significant	NO
BAT5	0.095	0.8211	0.0856037	Not significant	NO
BATF	0.129	0.716894	0.144545	Not significant	NO
BATF2	0.171	0.638791	0.194641	Not significant	NO
BATF3	-0.14	0.697685	0.15634	Not significant	YES
BAX	0.018	0.966148	0.0149564	Not significant	NO
BAZ1A	-0.18	0.629774	0.200815	Not significant	NO
BAZ1B	-0.163	0.679304	0.167936	Not significant	YES
BAZ2A	0.217	0.564731	0.248159	Not significant	NO
BAZ2B	-0.134	0.735276	0.13355	Not significant	YES
BBC3	-0.085	0.824036	0.0840539	Not significant	NO
BBS1	0.047	0.916835	0.037709	Not significant	NO
BBS10	0.184	0.636374	0.196288	Not significant	NO
BBS12	-0.133	0.730335	0.136478	Not significant	NO
BBS2	-0.061	0.891466	0.0498954	Not significant	NO
BBS4	0.241	0.517727	0.285899	Not significant	YES
BBS5	-0.553	0.206289	0.685524	Not significant	NO
BBS7	0.061	0.894029	0.0486485	Not significant	NO
BBS9	-0.029	0.947137	0.0235871	Not significant	NO
BBX	0.182	0.63864	0.194744	Not significant	NO
BCAM	-0.164	0.648999	0.187756	Not significant	NO
BCAP29	-0.101	0.799725	0.0970595	Not significant	YES
BCAP31	0.123	0.758711	0.119924	Not significant	NO
BCAR1	0.119	0.755065	0.122015	Not significant	YES
BCAR3	0.69	0.213719	0.670158	Not significant	NO
BCAS1	-2.185	0.0644634	1.19069	Not significant	YES
BCAS2	0.075	0.860116	0.0654428	Not significant	NO
BCAS3	-0.226	0.548417	0.260889	Not significant	NO
BCAS4	-0.356	0.373955	0.427181	Not significant	YES
BCAT1	-0.126	0.722387	0.14123	Not significant	YES
BCAT2	0.175	0.640934	0.193187	Not significant	NO
BCCIP	0.189	0.627454	0.202418	Not significant	NO
BCDIN3D	0.141	0.719408	0.143025	Not significant	YES
BCKDHA	0.105	0.791674	0.101453	Not significant	NO
BCKDHB	-0.12	0.757821	0.120433	Not significant	NO
BCKDK	-0.216	0.570063	0.244077	Not significant	NO
BCL10	-0.08	0.838897	0.0762912	Not significant	YES
BCL11A	-0.971	0.168493	0.773419	Not significant	NO
BCL11B	-0.171	0.638946	0.194536	Not significant	NO
BCL2	-0.257	0.505295	0.296455	Not significant	NO
BCL2A1	-0.082	0.817145	0.0877011	Not significant	YES
BCL2L1	-0.018	0.964897	0.0155192	Not significant	YES
BCL2L11	-0.115	0.774439	0.111013	Not significant	NO
BCL2L12	0.299	0.427975	0.368581	Not significant	NO
BCL2L13	0.067	0.879616	0.0557067	Not significant	YES
BCL2L14	-0.114	0.746766	0.126816	Not significant	NO
BCL2L2	-0.496	0.222304	0.653052	Not significant	YES
BCL3	-0.072	0.848295	0.0714529	Not significant	NO
BCL6	-0.285	0.446692	0.349991	Not significant	NO
BCL6B	-1.124	0.103626	0.984532	Not significant	YES
BCL7A	-0.113	0.768356	0.114438	Not significant	NO
BCL7B	-0.243	0.522543	0.281878	Not significant	YES
BCL7C	-0.525	0.231986	0.634538	Not significant	NO
BCL9	-0.042	0.920565	0.0359455	Not significant	YES
BCL9L	0.413	0.321677	0.49258	Not significant	YES
BCLAF1	-0.046	0.921809	0.035359	Not significant	NO
BCMO1	0.092	0.794281	0.100026	Not significant	NO
BCO2	-0.201	0.591704	0.227895	Not significant	NO
BCOR	-0.093	0.812375	0.0902435	Not significant	NO
BCORL1	0.203	0.583698	0.233812	Not significant	YES
BCR	-0.248	0.505295	0.296455	Not significant	NO
BCS1L	-0.068	0.877974	0.0565185	Not significant	NO
BDH1	-0.164	0.648925	0.187806	Not significant	NO
BDH2	-0.125	0.738206	0.131823	Not significant	NO
BDKRB1	-0.257	0.516175	0.287203	Not significant	NO
BDKRB2	-0.635	0.251688	0.599137	Not significant	YES
BDNF	-0.466	0.343684	0.463841	Not significant	NO
BDNFOS	-1.94	0.0694749	1.15817	Not significant	NO
BDP1	0.017	0.968118	0.0140718	Not significant	NO
BEAN	-0.067	0.852063	0.0695283	Not significant	NO
BECN1	-0.358	0.324176	0.489219	Not significant	NO
BEGAIN	-0.248	0.52906	0.276495	Not significant	NO
BEND3	-0.054	0.896844	0.0472832	Not significant	YES
BEND5	-0.435	0.355838	0.448747	Not significant	NO
BEND6	0.153	0.670187	0.173804	Not significant	NO
BEND7	-0.021	0.954172	0.0203733	Not significant	NO
BEST1	-0.309	0.431643	0.364875	Not significant	NO
BEST4	0.055	0.8803	0.0553691	Not significant	NO
BET1	-0.372	0.353657	0.451418	Not significant	NO
BET1L	-0.578	0.132809	0.876773	Not significant	YES
BEX2	-0.062	0.863611	0.063682	Not significant	NO
BEX4	0.146	0.686224	0.163534	Not significant	NO
BEX5	-0.091	0.795688	0.0992571	Not significant	NO
BFAR	-0.208	0.577474	0.238468	Not significant	YES
BFSP1	-0.148	0.68154	0.166508	Not significant	NO
BGLAP	0.048	0.903199	0.0442168	Not significant	NO
BGN	-0.977	0.139212	0.856323	Not significant	NO
BHLHA15	-0.374	0.404614	0.392959	Not significant	NO
BHLHB9	0.198	0.5966	0.224317	Not significant	NO
BHLHE22	-0.133	0.709739	0.148901	Not significant	NO
BHLHE40	-0.104	0.775001	0.110697	Not significant	NO
BHLHE41	-0.276	0.480392	0.318405	Not significant	NO
BHMT2	0.098	0.780208	0.10779	Not significant	NO
BICC1	-0.11	0.755226	0.121923	Not significant	NO
BICD1	0.151	0.677119	0.169335	Not significant	YES
BICD2	-0.022	0.960511	0.0174974	Not significant	NO
BID	-0.167	0.648788	0.187898	Not significant	NO
BIK	0.156	0.664145	0.177737	Not significant	NO
BIN1	-0.006	0.989945	0.00438893	Not significant	NO
BIN2	0.202	0.580947	0.235863	Not significant	NO
BIN3	-0.175	0.647541	0.188733	Not significant	NO
BIRC2	0.255	0.497136	0.303525	Not significant	NO
BIRC3	0.479	0.328982	0.482828	Not significant	NO
BIRC5	0.147	0.682173	0.166105	Not significant	NO
BIRC6	0.211	0.582231	0.234905	Not significant	NO
BIRC7	-0.071	0.838834	0.0763241	Not significant	NO
BIVM	-0.002	0.996986	0.00131106	Not significant	NO
BLCAP	0.041	0.928034	0.0324362	Not significant	NO
BLK	-0.414	0.374984	0.425987	Not significant	NO
BLM	0.439	0.332556	0.478135	Not significant	NO
BLMH	-0.124	0.739097	0.131299	Not significant	NO
BLNK	0.764	0.17709	0.751806	Not significant	NO
BLOC1S1	-0.05	0.905236	0.043238	Not significant	NO
BLOC1S2	0.21	0.581323	0.235582	Not significant	NO
BLOC1S3	0.365	0.334477	0.475634	Not significant	NO
BLVRA	-0.887	0.112361	0.949385	Not significant	NO
BLVRB	0.094	0.794071	0.10014	Not significant	YES
BLZF1	0.222	0.562394	0.24996	Not significant	NO
BMF	-0.164	0.653349	0.184855	Not significant	YES
BMI1	-0.133	0.731404	0.135843	Not significant	NO
BMP1	-0.063	0.866509	0.0622268	Not significant	NO
BMP2K	-0.145	0.699531	0.155193	Not significant	YES
BMP4	-0.775	0.218671	0.660209	Not significant	NO
BMP6	-0.173	0.641801	0.1926	Not significant	NO
BMP7	-0.305	0.464808	0.332726	Not significant	NO
BMP8A	-0.203	0.584621	0.233126	Not significant	NO
BMP8B	0.281	0.470975	0.327003	Not significant	NO
BMPER	0.005	0.990287	0.00423899	Not significant	NO
BMPR1A	0.473	0.218342	0.660864	Not significant	YES
BMPR2	0.244	0.517116	0.286412	Not significant	NO
BMS1	0.194	0.622401	0.20593	Not significant	NO
BMS1P4	-0.052	0.891964	0.0496528	Not significant	NO
BMS1P5	-0.035	0.932089	0.0305428	Not significant	NO
BNC2	-0.342	0.411509	0.385621	Not significant	YES
BNIP1	-0.265	0.479381	0.31932	Not significant	NO
BNIP2	0.295	0.428243	0.368309	Not significant	NO
BNIP3	0.191	0.601345	0.220876	Not significant	NO
BNIP3L	-0.381	0.331888	0.479008	Not significant	NO
BNIPL	0.089	0.800017	0.096901	Not significant	NO
BOC	-0.311	0.438524	0.358007	Not significant	NO
BOD1	-0.077	0.847602	0.0718079	Not significant	YES
BOD1L	0.182	0.63719	0.195731	Not significant	NO
BOK	-0.177	0.629518	0.200992	Not significant	NO
BOLA1	-0.129	0.727924	0.137914	Not significant	NO
BOLA2	0.139	0.707719	0.150139	Not significant	NO
BOLA3	0.058	0.887369	0.0518957	Not significant	NO
BOP1	-0.27	0.48678	0.312668	Not significant	NO
BPGM	-0.042	0.920653	0.0359039	Not significant	NO
BPHL	-0.13	0.728276	0.137704	Not significant	NO
BPNT1	-0.161	0.676552	0.169699	Not significant	NO
BPTF	-0.082	0.838834	0.0763241	Not significant	YES
BRAF	-0.074	0.856539	0.0672526	Not significant	NO
BRAP	0.169	0.675598	0.170312	Not significant	NO
BRCA1	0.171	0.638946	0.194536	Not significant	NO
BRCA2	1.539	0.0662598	1.17875	Not significant	NO
BRCC3	0.475	0.230398	0.637522	Not significant	NO
BRD1	-0.086	0.834626	0.0785083	Not significant	NO
BRD2	0.138	0.734482	0.134019	Not significant	NO
BRD3	0.145	0.712878	0.146985	Not significant	YES
BRD4	0.153	0.702571	0.15331	Not significant	NO
BRD7	0.131	0.752036	0.123762	Not significant	NO
BRD8	-0.081	0.85045	0.070351	Not significant	NO
BRD9	-0.066	0.873196	0.0588884	Not significant	NO
BRE	0.107	0.794071	0.10014	Not significant	NO
BREA2	-0.002	0.996564	0.00149496	Not significant	NO
BRF1	-0.079	0.844749	0.0732724	Not significant	NO
BRF2	0.029	0.942964	0.0255048	Not significant	NO
BRI3	-0.22	0.553087	0.257206	Not significant	YES
BRI3BP	0.056	0.885976	0.0525779	Not significant	YES
BRIP1	0.008	0.984183	0.00692413	Not significant	YES
BRIX1	0.075	0.84543	0.0729222	Not significant	NO
BRMS1	0.209	0.586176	0.231972	Not significant	NO
BRMS1L	-0.131	0.716894	0.144545	Not significant	NO
BRP44	-0.08	0.834247	0.0787051	Not significant	NO
BRP44L	-0.088	0.819389	0.0865098	Not significant	NO
BRPF1	-0.026	0.954863	0.0200591	Not significant	NO
BRPF3	-0.099	0.797293	0.0983821	Not significant	YES
BRSK1	-0.137	0.702509	0.153348	Not significant	NO
BRSK2	-0.294	0.477027	0.321457	Not significant	NO
BRWD1	0.456	0.236093	0.626917	Not significant	YES
BRWD3	0.09	0.809011	0.0920458	Not significant	YES
BSCL2	-0.044	0.920125	0.0361534	Not significant	NO
BSDC1	-0.329	0.365073	0.43762	Not significant	YES
BSG	-0.4	0.312846	0.504669	Not significant	NO
BSN	-0.122	0.730611	0.136314	Not significant	NO
BSPRY	0.068	0.858111	0.0664565	Not significant	NO
BST1	-0.03	0.938186	0.0277111	Not significant	NO
BST2	0.09	0.800102	0.0968547	Not significant	NO
BTAF1	0.009	0.985927	0.00615534	Not significant	YES
BTBD1	-0.01	0.983725	0.00712619	Not significant	NO
BTBD10	-0.049	0.91262	0.03971	Not significant	NO
BTBD11	-0.108	0.758066	0.120293	Not significant	NO
BTBD12	-0.02	0.963303	0.016237	Not significant	NO
BTBD19	-0.044	0.907142	0.0423248	Not significant	NO
BTBD2	-0.297	0.426826	0.369749	Not significant	NO
BTBD3	0.181	0.625975	0.203443	Not significant	NO
BTBD6	-0.032	0.941907	0.0259919	Not significant	NO
BTBD7	0.168	0.66753	0.175529	Not significant	YES
BTBD8	0.306	0.445391	0.351259	Not significant	NO
BTBD9	-0.237	0.523909	0.280744	Not significant	YES
BTC	-0.223	0.555242	0.255518	Not significant	NO
BTD	-0.395	0.322108	0.491998	Not significant	YES
BTF3	-0.149	0.702149	0.153571	Not significant	NO
BTF3L4	0.152	0.699507	0.155208	Not significant	NO
BTG1	-0.282	0.455193	0.341805	Not significant	NO
BTG2	-0.014	0.968586	0.013862	Not significant	NO
BTG3	-0.149	0.687612	0.162657	Not significant	NO
BTK	-0.367	0.382987	0.416816	Not significant	NO
BTLA	-0.154	0.668049	0.175192	Not significant	YES
BTN2A1	0.049	0.916042	0.0380848	Not significant	NO
BTN2A2	-0.014	0.974824	0.0110737	Not significant	NO
BTN2A3	0.114	0.759755	0.119326	Not significant	NO
BTN3A1	0.037	0.931532	0.030802	Not significant	NO
BTN3A2	0.093	0.801439	0.0961298	Not significant	NO
BTN3A3	0.025	0.951179	0.0217379	Not significant	NO
BTNL9	-0.328	0.440672	0.355884	Not significant	YES
BTRC	0.184	0.643545	0.191421	Not significant	YES
BUB1	0.406	0.364879	0.437851	Not significant	YES
BUB1B	0.276	0.48223	0.316746	Not significant	NO
BUB3	0.412	0.273682	0.562753	Not significant	NO
BUD13	0.261	0.485858	0.313491	Not significant	NO
BUD31	-0.123	0.741107	0.130119	Not significant	NO
BVES	0.053	0.886193	0.0524715	Not significant	NO
BYSL	0.08	0.834052	0.0788068	Not significant	YES
BZRAP1	-0.886	0.183238	0.736984	Not significant	YES
BZW1	-0.042	0.922498	0.0350344	Not significant	YES
C10orf10	-0.305	0.441276	0.35529	Not significant	NO
C10orf107	-0.083	0.812657	0.0900925	Not significant	NO
C10orf108	-0.462	0.335739	0.473999	Not significant	NO
C10orf11	-0.079	0.828652	0.081628	Not significant	YES
C10orf110	-0.106	0.761993	0.118049	Not significant	NO
C10orf111	-0.309	0.462561	0.334831	Not significant	NO
C10orf114	0.331	0.42763	0.368931	Not significant	NO
C10orf116	-0.444	0.355696	0.448921	Not significant	NO
C10orf118	0.32	0.400224	0.397697	Not significant	NO
C10orf119	0.27	0.475249	0.323078	Not significant	NO
C10orf12	0.386	0.335882	0.473813	Not significant	NO
C10orf125	0.005	0.991535	0.0036921	Not significant	NO
C10orf128	-0.592	0.275615	0.559697	Not significant	NO
C10orf137	0.05	0.908505	0.0416727	Not significant	NO
C10orf140	0.33	0.426811	0.369764	Not significant	NO
C10orf18	0.157	0.693567	0.158911	Not significant	NO
C10orf2	0.156	0.678703	0.16832	Not significant	NO
C10orf25	0.032	0.938686	0.0274797	Not significant	YES
C10orf26	0.437	0.231261	0.635898	Not significant	NO
C10orf28	0.255	0.497504	0.303203	Not significant	NO
C10orf32	0.154	0.689212	0.161647	Not significant	NO
C10orf35	0.077	0.842099	0.0746369	Not significant	NO
C10orf4	0.175	0.658117	0.181697	Not significant	NO
C10orf41	-0.191	0.599761	0.222022	Not significant	NO
C10orf46	0.258	0.494255	0.306049	Not significant	NO
C10orf47	0.537	0.25427	0.594704	Not significant	NO
C10orf54	0.161	0.663893	0.177902	Not significant	NO
C10orf55	-0.242	0.534528	0.27203	Not significant	NO
C10orf57	0.133	0.730611	0.136314	Not significant	NO
C10orf58	0.198	0.604306	0.218743	Not significant	NO
C10orf68	-0.177	0.633096	0.198531	Not significant	NO
C10orf72	-1.603	0.0752284	1.12362	Not significant	NO
C10orf75	-0.011	0.976374	0.0103838	Not significant	NO
C10orf76	-0.027	0.954195	0.0203626	Not significant	NO
C10orf78	0.051	0.903269	0.044183	Not significant	NO
C10orf79	-0.298	0.474792	0.323497	Not significant	NO
C10orf81	-0.579	0.289748	0.53798	Not significant	NO
C10orf84	0.142	0.717291	0.144305	Not significant	NO
C10orf88	0.377	0.312557	0.505071	Not significant	NO
C10orf91	-0.053	0.883868	0.0536124	Not significant	NO
C10orf95	-0.174	0.636963	0.195885	Not significant	NO
C11orf1	-0.269	0.477027	0.321457	Not significant	NO
C11orf10	0.046	0.918155	0.0370841	Not significant	NO
C11orf16	-0.241	0.536535	0.270402	Not significant	NO
C11orf17	-0.147	0.716669	0.144681	Not significant	NO
C11orf2	-0.026	0.953557	0.0206534	Not significant	NO
C11orf21	-0.498	0.326015	0.486762	Not significant	NO
C11orf24	-0.043	0.922441	0.0350615	Not significant	NO
C11orf30	0.104	0.795329	0.0994532	Not significant	NO
C11orf31	0.019	0.963496	0.0161499	Not significant	NO
C11orf35	-0.128	0.717259	0.144324	Not significant	NO
C11orf45	0.242	0.518231	0.285477	Not significant	NO
C11orf46	-0.359	0.337427	0.471821	Not significant	NO
C11orf48	0.089	0.823418	0.0843795	Not significant	NO
C11orf49	-0.168	0.656054	0.183061	Not significant	NO
C11orf51	-0.08	0.839696	0.0758781	Not significant	NO
C11orf52	0.055	0.884513	0.0532959	Not significant	NO
C11orf54	-0.048	0.908197	0.0418197	Not significant	NO
C11orf57	0.212	0.584265	0.23339	Not significant	NO
C11orf58	-0.197	0.616724	0.209909	Not significant	NO
C11orf59	-0.044	0.921833	0.0353478	Not significant	NO
C11orf61	0.038	0.927002	0.0329194	Not significant	NO
C11orf63	0.41	0.350384	0.455456	Not significant	NO
C11orf65	-0.146	0.683296	0.165391	Not significant	NO
C11orf66	-0.303	0.470975	0.327003	Not significant	NO
C11orf67	-0.207	0.57773	0.238275	Not significant	NO
C11orf68	0.178	0.653906	0.184484	Not significant	NO
C11orf70	0.166	0.646977	0.189111	Not significant	NO
C11orf71	-0.056	0.888873	0.0511602	Not significant	NO
C11orf73	-0.017	0.969459	0.0134706	Not significant	NO
C11orf74	-0.057	0.89044	0.0503954	Not significant	YES
C11orf75	-0.026	0.950358	0.0221126	Not significant	NO
C11orf80	0.014	0.971801	0.0124228	Not significant	NO
C11orf82	0.268	0.488339	0.311279	Not significant	YES
C11orf83	0.112	0.758711	0.119924	Not significant	NO
C11orf84	0.093	0.810274	0.091368	Not significant	NO
C11orf88	-0.415	0.351433	0.454157	Not significant	YES
C11orf9	-0.236	0.546028	0.262785	Not significant	NO
C11orf92	-1.537	0.104754	0.979831	Not significant	NO
C11orf95	-0.031	0.940868	0.0264715	Not significant	NO
C12orf10	0.063	0.884748	0.0531805	Not significant	NO
C12orf11	0.003	0.996564	0.00149496	Not significant	NO
C12orf23	-0.113	0.768356	0.114438	Not significant	NO
C12orf24	-0.062	0.866378	0.0622926	Not significant	NO
C12orf26	-0.035	0.936508	0.0284887	Not significant	NO
C12orf29	0.035	0.934791	0.0292855	Not significant	NO
C12orf32	0.252	0.50089	0.300257	Not significant	NO
C12orf34	-0.063	0.861699	0.0646445	Not significant	NO
C12orf35	0.086	0.8211	0.0856037	Not significant	NO
C12orf4	-0.048	0.914386	0.0388704	Not significant	YES
C12orf41	0.067	0.876545	0.0572258	Not significant	NO
C12orf43	0.136	0.74033	0.130575	Not significant	YES
C12orf44	0.08	0.84331	0.0740126	Not significant	NO
C12orf45	-0.088	0.823622	0.0842721	Not significant	NO
C12orf47	-0.052	0.906415	0.0426732	Not significant	NO
C12orf48	0.06	0.871147	0.0599085	Not significant	NO
C12orf49	-0.117	0.754281	0.122467	Not significant	YES
C12orf5	0.179	0.643895	0.191185	Not significant	NO
C12orf51	-0.057	0.891947	0.0496609	Not significant	NO
C12orf52	-0.119	0.765499	0.116056	Not significant	NO
C12orf53	-0.228	0.554913	0.255775	Not significant	NO
C12orf57	-0.17	0.64293	0.191836	Not significant	NO
C12orf59	1.558	0.0818056	1.08722	Not significant	NO
C12orf60	0.493	0.287845	0.540841	Not significant	NO
C12orf61	0.017	0.964745	0.0155876	Not significant	YES
C12orf62	-0.002	0.996946	0.00132821	Not significant	NO
C12orf63	-0.129	0.718105	0.143812	Not significant	NO
C12orf65	0.012	0.979368	0.0090539	Not significant	NO
C12orf66	0.029	0.9464	0.0239252	Not significant	NO
C12orf68	0.112	0.750834	0.124456	Not significant	NO
C12orf69	0.906	0.172327	0.763647	Not significant	NO
C12orf72	-0.103	0.790001	0.102372	Not significant	NO
C12orf73	-0.071	0.859451	0.0657787	Not significant	YES
C12orf74	-0.323	0.446524	0.350155	Not significant	NO
C12orf75	0.128	0.720031	0.142649	Not significant	NO
C12orf76	-0.144	0.694375	0.158406	Not significant	NO
C13orf15	-0.186	0.60996	0.214698	Not significant	NO
C13orf18	-0.16	0.656054	0.183061	Not significant	NO
C13orf23	0.454	0.26754	0.572611	Not significant	NO
C13orf27	0.098	0.788323	0.103296	Not significant	NO
C13orf29	0.224	0.554599	0.256021	Not significant	NO
C13orf30	-1.635	0.081066	1.09116	Not significant	NO
C13orf31	0.466	0.270932	0.56714	Not significant	NO
C13orf33	-0.357	0.412787	0.384274	Not significant	NO
C13orf34	1.132	0.0831175	1.08031	Not significant	NO
C13orf37	0.403	0.329106	0.482665	Not significant	NO
C13orf38	-0.008	0.983774	0.00710484	Not significant	NO
C14orf1	0.139	0.723027	0.140845	Not significant	NO
C14orf101	-0.006	0.99129	0.0037992	Not significant	NO
C14orf102	-0.09	0.825243	0.0834182	Not significant	NO
C14orf104	-0.133	0.727838	0.137965	Not significant	NO
C14orf106	0.026	0.951932	0.021394	Not significant	NO
C14orf109	-0.145	0.710732	0.148294	Not significant	NO
C14orf118	0.144	0.713988	0.146309	Not significant	NO
C14orf119	-0.119	0.756492	0.121196	Not significant	NO
C14orf126	-0.238	0.521037	0.283132	Not significant	NO
C14orf128	-0.059	0.87547	0.0577589	Not significant	NO
C14orf129	0.095	0.801246	0.0962343	Not significant	NO
C14orf132	-2.046	0.0548955	1.26046	Not significant	YES
C14orf135	-0.204	0.598678	0.222807	Not significant	NO
C14orf138	-0.121	0.758965	0.119778	Not significant	NO
C14orf139	-0.043	0.911198	0.0403873	Not significant	NO
C14orf142	-0.033	0.937722	0.027926	Not significant	YES
C14orf143	0.171	0.638946	0.194536	Not significant	NO
C14orf145	0.122	0.735052	0.133682	Not significant	NO
C14orf147	0.028	0.941907	0.0259919	Not significant	NO
C14orf148	-0.016	0.964959	0.0154913	Not significant	NO
C14orf149	0.196	0.59316	0.226828	Not significant	NO
C14orf153	-0.064	0.877358	0.0568229	Not significant	NO
C14orf156	0.105	0.784562	0.105373	Not significant	NO
C14orf159	-0.083	0.829293	0.0812918	Not significant	NO
C14orf166	-0.178	0.647541	0.188733	Not significant	YES
C14orf167	-0.785	0.144402	0.840426	Not significant	NO
C14orf169	0.086	0.83829	0.0766059	Not significant	NO
C14orf174	-0.162	0.653517	0.184743	Not significant	NO
C14orf176	-0.083	0.813183	0.0898118	Not significant	NO
C14orf179	-0.119	0.757153	0.120816	Not significant	NO
C14orf181	0.009	0.982008	0.00788511	Not significant	NO
C14orf182	0.211	0.564911	0.24802	Not significant	NO
C14orf19	-0.067	0.851998	0.0695616	Not significant	NO
C14orf2	0.036	0.933703	0.029791	Not significant	NO
C14orf21	-0.096	0.81114	0.0909043	Not significant	NO
C14orf28	-0.27	0.473213	0.324943	Not significant	NO
C14orf33	0.151	0.676912	0.169468	Not significant	NO
C14orf37	-0.171	0.639409	0.194221	Not significant	NO
C14orf4	-0.113	0.768356	0.114438	Not significant	NO
C14orf43	0.243	0.519364	0.284528	Not significant	NO
C14orf45	-0.268	0.478996	0.319668	Not significant	NO
C14orf49	0.038	0.920565	0.0359455	Not significant	NO
C14orf50	0.078	0.825577	0.0832427	Not significant	NO
C14orf64	-0.462	0.347094	0.459553	Not significant	NO
C14orf72	-0.273	0.489986	0.309816	Not significant	NO
C14orf73	-0.085	0.810306	0.0913508	Not significant	NO
C14orf79	-0.232	0.533192	0.273116	Not significant	NO
C14orf80	0.117	0.74733	0.126487	Not significant	NO
C14orf93	-0.156	0.698437	0.155873	Not significant	YES
C15orf17	-0.094	0.821069	0.0856202	Not significant	NO
C15orf21	-0.069	0.859451	0.0657787	Not significant	NO
C15orf23	0.396	0.347203	0.459416	Not significant	NO
C15orf24	0.03	0.946744	0.0237673	Not significant	NO
C15orf26	-0.119	0.737172	0.132431	Not significant	NO
C15orf27	0.318	0.417061	0.3798	Not significant	NO
C15orf28	-0.041	0.912273	0.0398752	Not significant	NO
C15orf29	-0.021	0.95902	0.0181723	Not significant	NO
C15orf33	-0.036	0.927074	0.0328855	Not significant	NO
C15orf34	-0.117	0.74033	0.130575	Not significant	NO
C15orf37	-0.099	0.791759	0.101407	Not significant	NO
C15orf38	0.133	0.734301	0.134126	Not significant	YES
C15orf39	0.175	0.651474	0.186103	Not significant	YES
C15orf40	0.26	0.488278	0.311333	Not significant	YES
C15orf41	0.202	0.585594	0.232404	Not significant	NO
C15orf42	0.981	0.162416	0.789371	Not significant	NO
C15orf44	0.332	0.365073	0.43762	Not significant	NO
C15orf48	0.099	0.777817	0.109122	Not significant	NO
C15orf51	0.012	0.973631	0.0116058	Not significant	NO
C15orf52	-0.344	0.408613	0.388688	Not significant	YES
C15orf56	0.13	0.716927	0.144525	Not significant	NO
C15orf57	-0.068	0.87411	0.058434	Not significant	NO
C15orf58	0.038	0.930998	0.0310511	Not significant	NO
C15orf59	-0.151	0.678338	0.168554	Not significant	NO
C15orf61	0.081	0.838213	0.0766457	Not significant	YES
C15orf62	-0.062	0.869905	0.0605281	Not significant	YES
C15orf63	0.062	0.878263	0.0563752	Not significant	NO
C16orf13	-0.417	0.317589	0.498135	Not significant	NO
C16orf3	-0.084	0.812198	0.0903381	Not significant	NO
C16orf42	-0.163	0.683296	0.165391	Not significant	NO
C16orf45	-0.732	0.216405	0.664733	Not significant	NO
C16orf46	-0.075	0.849126	0.071028	Not significant	NO
C16orf48	-0.036	0.929613	0.0316976	Not significant	NO
C16orf5	-0.362	0.363817	0.439117	Not significant	NO
C16orf52	0.556	0.147746	0.830483	Not significant	YES
C16orf53	-0.219	0.56459	0.248266	Not significant	NO
C16orf54	-0.322	0.433755	0.362756	Not significant	YES
C16orf55	-0.145	0.706112	0.151126	Not significant	NO
C16orf57	0.08	0.852133	0.0694925	Not significant	NO
C16orf58	-0.241	0.51771	0.285914	Not significant	YES
C16orf59	0.072	0.842099	0.0746369	Not significant	NO
C16orf61	0.181	0.634744	0.197402	Not significant	NO
C16orf62	-0.241	0.525422	0.279492	Not significant	NO
C16orf63	0.046	0.915833	0.0381837	Not significant	NO
C16orf68	-0.237	0.533411	0.272938	Not significant	NO
C16orf7	-0.117	0.756169	0.121381	Not significant	NO
C16orf70	0.074	0.867918	0.0615212	Not significant	NO
C16orf71	-0.221	0.562912	0.24956	Not significant	NO
C16orf72	0.006	0.99187	0.0035451	Not significant	NO
C16orf74	0.11	0.755226	0.121923	Not significant	NO
C16orf75	0.206	0.571629	0.242886	Not significant	NO
C16orf79	-0.016	0.964897	0.0155192	Not significant	NO
C16orf80	0.207	0.594058	0.226171	Not significant	NO
C16orf86	0	0.999262	0.000320608	Not significant	NO
C16orf87	0.372	0.331274	0.479813	Not significant	YES
C16orf88	-0.089	0.830702	0.0805545	Not significant	NO
C16orf91	-0.056	0.894269	0.0485319	Not significant	NO
C16orf93	-0.792	0.19343	0.713476	Not significant	NO
C17orf100	-0.157	0.672081	0.172579	Not significant	NO
C17orf101	-0.015	0.971801	0.0124228	Not significant	NO
C17orf103	-0.136	0.711959	0.147545	Not significant	NO
C17orf106	0.069	0.865478	0.0627437	Not significant	NO
C17orf107	-0.119	0.738206	0.131823	Not significant	YES
C17orf108	-0.211	0.564731	0.248159	Not significant	NO
C17orf28	-0.082	0.826535	0.0827386	Not significant	NO
C17orf39	0.127	0.754382	0.122409	Not significant	NO
C17orf42	-0.05	0.909091	0.0413928	Not significant	NO
C17orf44	-0.227	0.541761	0.266192	Not significant	NO
C17orf46	-0.128	0.717251	0.144329	Not significant	NO
C17orf47	-0.06	0.868911	0.0610247	Not significant	NO
C17orf48	-0.195	0.605808	0.217665	Not significant	NO
C17orf49	-0.1	0.809011	0.0920458	Not significant	NO
C17orf51	-0.214	0.561898	0.250342	Not significant	YES
C17orf53	0.096	0.784404	0.10546	Not significant	NO
C17orf55	-0.022	0.951545	0.0215707	Not significant	NO
C17orf56	0.102	0.79397	0.100196	Not significant	NO
C17orf57	-0.08	0.824036	0.0840539	Not significant	NO
C17orf58	0.006	0.989339	0.00465508	Not significant	NO
C17orf59	0.136	0.734301	0.134126	Not significant	NO
C17orf60	-0.766	0.213545	0.67051	Not significant	NO
C17orf61	-0.085	0.815048	0.088817	Not significant	NO
C17orf62	-0.107	0.794807	0.0997381	Not significant	NO
C17orf63	0.078	0.851434	0.0698489	Not significant	NO
C17orf65	-0.073	0.85949	0.0657591	Not significant	NO
C17orf67	-0.115	0.748487	0.125816	Not significant	NO
C17orf68	-0.096	0.808293	0.0924311	Not significant	NO
C17orf69	0.079	0.832459	0.079637	Not significant	NO
C17orf70	-0.068	0.87388	0.0585483	Not significant	NO
C17orf71	-0.035	0.940124	0.0268148	Not significant	NO
C17orf72	-1.603	0.0960174	1.01765	Not significant	NO
C17orf75	0.054	0.89711	0.0471542	Not significant	NO
C17orf76	-0.029	0.939106	0.0272854	Not significant	NO
C17orf79	-0.232	0.540836	0.266934	Not significant	NO
C17orf80	0.073	0.868662	0.0611492	Not significant	NO
C17orf81	-0.194	0.613058	0.212498	Not significant	NO
C17orf82	-0.225	0.55352	0.256867	Not significant	YES
C17orf85	0.08	0.844289	0.0735088	Not significant	YES
C17orf86	-0.071	0.85614	0.0674551	Not significant	NO
C17orf87	-1.202	0.134707	0.87061	Not significant	NO
C17orf89	-0.1	0.794343	0.0999919	Not significant	NO
C17orf90	0.025	0.951141	0.0217552	Not significant	NO
C17orf91	-0.098	0.792062	0.101241	Not significant	NO
C17orf95	-0.022	0.961616	0.0169982	Not significant	NO
C17orf96	0.209	0.568423	0.245329	Not significant	NO
C17orf97	0.116	0.74248	0.129315	Not significant	NO
C18orf1	-1.284	0.101806	0.992228	Not significant	NO
C18orf10	-0.191	0.606908	0.216877	Not significant	NO
C18orf18	-0.134	0.716669	0.144681	Not significant	NO
C18orf19	-0.017	0.968214	0.0140287	Not significant	NO
C18orf21	-0.278	0.458859	0.33832	Not significant	YES
C18orf22	-0.739	0.131553	0.880899	Not significant	NO
C18orf25	-0.227	0.553918	0.256555	Not significant	NO
C18orf32	-0.447	0.28199	0.549766	Not significant	YES
C18orf45	-0.034	0.937106	0.0282114	Not significant	NO
C18orf54	0.218	0.555082	0.255643	Not significant	NO
C18orf55	-0.279	0.458019	0.339117	Not significant	NO
C18orf56	0.018	0.961616	0.0169982	Not significant	NO
C18orf8	0.049	0.915451	0.0383649	Not significant	NO
C19orf10	-0.457	0.267209	0.573148	Not significant	NO
C19orf12	0.25	0.503669	0.297855	Not significant	NO
C19orf18	-0.114	0.746704	0.126852	Not significant	NO
C19orf2	0.111	0.777764	0.109152	Not significant	NO
C19orf20	-0.058	0.877358	0.0568229	Not significant	NO
C19orf21	0.084	0.811955	0.0904681	Not significant	NO
C19orf22	-0.428	0.274608	0.561287	Not significant	NO
C19orf23	0.042	0.912934	0.0395606	Not significant	NO
C19orf24	-0.257	0.488398	0.311226	Not significant	YES
C19orf25	-0.519	0.228678	0.640775	Not significant	NO
C19orf26	-0.062	0.863489	0.0637432	Not significant	NO
C19orf28	0.103	0.779457	0.108208	Not significant	NO
C19orf29	-0.208	0.588018	0.230609	Not significant	NO
C19orf33	0.085	0.809285	0.0918988	Not significant	NO
C19orf35	-0.272	0.487622	0.311917	Not significant	NO
C19orf36	-1.251	0.134481	0.87134	Not significant	NO
C19orf38	-0.062	0.866398	0.0622826	Not significant	NO
C19orf39	-0.257	0.490573	0.309296	Not significant	NO
C19orf40	0.359	0.379157	0.421181	Not significant	NO
C19orf42	-0.124	0.75875	0.119901	Not significant	NO
C19orf43	-0.103	0.803357	0.0950914	Not significant	NO
C19orf44	-0.262	0.482518	0.316486	Not significant	YES
C19orf46	0.004	0.994229	0.00251348	Not significant	NO
C19orf47	0.572	0.181273	0.741667	Not significant	YES
C19orf48	0.131	0.719871	0.142745	Not significant	NO
C19orf50	0.026	0.954962	0.020014	Not significant	NO
C19orf51	-0.021	0.954172	0.0203733	Not significant	NO
C19orf52	0.063	0.890663	0.0502867	Not significant	NO
C19orf53	-0.177	0.640385	0.193559	Not significant	NO
C19orf54	0.312	0.407708	0.389651	Not significant	NO
C19orf55	0.118	0.75428	0.122467	Not significant	NO
C19orf56	-0.1	0.810645	0.0911691	Not significant	NO
C19orf57	0.016	0.96373	0.0160446	Not significant	NO
C19orf59	-2.234	0.0626445	1.20312	Not significant	NO
C19orf6	-0.47	0.248311	0.605004	Not significant	NO
C19orf60	0.027	0.947136	0.0235878	Not significant	NO
C19orf61	0.267	0.478239	0.320355	Not significant	NO
C19orf62	-0.09	0.831556	0.0801083	Not significant	NO
C19orf63	0.101	0.794807	0.0997381	Not significant	NO
C19orf66	0.039	0.929721	0.0316476	Not significant	YES
C19orf70	-0.112	0.767803	0.11475	Not significant	NO
C19orf71	-0.019	0.960301	0.0175926	Not significant	NO
C19orf73	-0.078	0.829842	0.0810044	Not significant	NO
C19orf76	-0.214	0.564731	0.248159	Not significant	NO
C1D	0.156	0.688018	0.1624	Not significant	NO
C1GALT1	0.113	0.75615	0.121392	Not significant	YES
C1GALT1C1	0.008	0.986639	0.00584157	Not significant	NO
C1orf101	-0.203	0.586663	0.231611	Not significant	NO
C1orf103	0.275	0.463993	0.333488	Not significant	NO
C1orf104	-0.019	0.960962	0.0172936	Not significant	NO
C1orf106	-0.07	0.845474	0.0728999	Not significant	NO
C1orf107	0.072	0.866479	0.062242	Not significant	NO
C1orf109	0.204	0.599184	0.222439	Not significant	NO
C1orf112	0.211	0.566989	0.246425	Not significant	NO
C1orf113	0.033	0.934027	0.0296407	Not significant	NO
C1orf114	-0.147	0.686224	0.163534	Not significant	NO
C1orf115	0.443	0.338169	0.470866	Not significant	NO
C1orf122	0.06	0.887411	0.051875	Not significant	NO
C1orf123	-0.042	0.928034	0.0324362	Not significant	NO
C1orf124	0.097	0.818173	0.087155	Not significant	NO
C1orf126	-0.136	0.704614	0.152049	Not significant	NO
C1orf127	-0.271	0.499684	0.301304	Not significant	NO
C1orf128	-0.101	0.811955	0.0904681	Not significant	NO
C1orf130	0.361	0.407741	0.389616	Not significant	NO
C1orf131	0.02	0.963496	0.0161499	Not significant	YES
C1orf133	0.001	0.997827	0.000944938	Not significant	NO
C1orf135	0.233	0.540095	0.26753	Not significant	NO
C1orf144	0.066	0.883763	0.0536644	Not significant	NO
C1orf150	-0.074	0.833243	0.0792283	Not significant	NO
C1orf151	-0.057	0.89602	0.0476822	Not significant	NO
C1orf152	-0.141	0.694211	0.158508	Not significant	NO
C1orf156	-0.089	0.830449	0.0806871	Not significant	NO
C1orf159	0.024	0.952691	0.0210478	Not significant	NO
C1orf161	0.291	0.479993	0.318765	Not significant	NO
C1orf162	-0.617	0.237572	0.624205	Not significant	NO
C1orf163	0.084	0.833874	0.0788997	Not significant	NO
C1orf168	-1.255	0.119612	0.922224	Not significant	NO
C1orf170	-0.072	0.838213	0.0766457	Not significant	NO
C1orf172	0.029	0.946204	0.0240151	Not significant	NO
[truncated: 13,454 more rows]

## Sheet: n.97-98dupGG_MIR205_DE_genes
gene_ID	log2(FC)	adj_p-value	-log10(adj_p-value)	change_direction	predicted_target_mir-205_mut-specific
MSI2	-3.111	0.00824779	2.08366	Down	YES
NPNT	-4.587	0.00894562	2.04839	Down	YES
MAP7D3	-1.549	0.0257519	1.58919	Down	YES
PTPN13	-3.103	0.0421355	1.37535	Down	YES
TCEAL8	-2.836	9.49284e-09	8.0226	Down	NO
TMEM9	-3.831	2.4072e-08	7.61849	Down	NO
SNUPN	-2.491	2.64618e-07	6.57738	Down	NO
BEX2	-4.497	2.14135e-05	4.66931	Down	NO
C15orf57	-2.273	7.55913e-05	4.12153	Down	NO
KRT17	-6.22	0.00201579	2.69555	Down	NO
UBE2E2	-2.017	0.00201579	2.69555	Down	NO
WFDC2	-5.283	0.00534349	2.27218	Down	NO
EPCAM	-5.451	0.0060585	2.21763	Down	NO
CNKSR1	-4.506	0.00772692	2.11199	Down	NO
LDHB	-2.445	0.00824779	2.08366	Down	NO
C11orf49	-1.868	0.0101536	1.99338	Down	NO
DTX3	-1.543	0.0146841	1.83315	Down	NO
CYP2R1	-1.552	0.0148177	1.82922	Down	NO
HOXA3	-3.975	0.0149117	1.82647	Down	NO
ME3	-2.408	0.0149117	1.82647	Down	NO
NAP1L5	-2.844	0.0149117	1.82647	Down	NO
PTPRU	-3.439	0.0240165	1.61949	Down	NO
RAB3IP	-2.551	0.0258109	1.5882	Down	NO
MAL2	-3.578	0.0267538	1.57262	Down	NO
FERMT1	-3.415	0.033616	1.47345	Down	NO
MBOAT2	-2.202	0.0381052	1.41902	Down	NO
GPR98	-1.605	0.0413964	1.38304	Down	NO
DPP6	-2.205	0.0421355	1.37535	Down	NO
LOC388152	-1.78	0.0421355	1.37535	Down	NO
DEPDC7	-2.963	0.0427611	1.36895	Down	NO
ARMCX6	-1.237	0.0449383	1.34738	Down	NO
LANCL1	1.136	0.0520041	1.28396	Not significant	YES
ACADL	-2.576	0.0569345	1.24462	Not significant	NO
CDH2	-2.497	0.059467	1.22572	Not significant	NO
FLRT3	-1.165	0.059467	1.22572	Not significant	NO
ZNF677	-2.364	0.059467	1.22572	Not significant	NO
SLPI	-1.181	0.0637726	1.19537	Not significant	NO
UCHL1	-2.387	0.0638128	1.19509	Not significant	NO
SLC44A5	-1.276	0.0650313	1.18688	Not significant	NO
SLC11A2	-1.249	0.0682335	1.166	Not significant	NO
ARMCX2	-1.993	0.0700675	1.15448	Not significant	NO
BEX4	-1.502	0.0700675	1.15448	Not significant	NO
C19orf2	0.437	0.0700675	1.15448	Not significant	NO
GDA	-1.013	0.0700675	1.15448	Not significant	YES
HOXA2	-2.049	0.0700675	1.15448	Not significant	NO
KBTBD11	-2.177	0.0700675	1.15448	Not significant	NO
LOC440905	-1.447	0.0700675	1.15448	Not significant	NO
MAP9	-1.988	0.0700675	1.15448	Not significant	YES
PEG10	-1.732	0.0700675	1.15448	Not significant	NO
psiTPTE22	-1.873	0.0700675	1.15448	Not significant	NO
WDR72	-0.718	0.0700675	1.15448	Not significant	NO
PSPH	0.824	0.0709399	1.14911	Not significant	NO
CLNS1A	-0.434	0.0738481	1.13166	Not significant	NO
CNTN4	-1.644	0.0761597	1.11827	Not significant	YES
KLF8	1.782	0.0761597	1.11827	Not significant	NO
PHF17	-0.653	0.0761597	1.11827	Not significant	NO
RAD23B	0.424	0.0761597	1.11827	Not significant	NO
C9orf25	0.61	0.077046	1.11325	Not significant	NO
ELFN1	-1.759	0.0820229	1.08606	Not significant	NO
ARHGAP10	-1.3	0.0826105	1.08296	Not significant	NO
PLIN2	-1.106	0.0863424	1.06378	Not significant	NO
CNBP	-0.378	0.0883335	1.05387	Not significant	NO
HMGA2	-0.856	0.0883335	1.05387	Not significant	NO
PRSS12	-1.294	0.0892637	1.04933	Not significant	NO
CLDN1	-1.583	0.0915241	1.03846	Not significant	YES
COL2A1	-0.867	0.0915241	1.03846	Not significant	YES
CPXM1	-1.585	0.0915241	1.03846	Not significant	NO
KRT14	-0.816	0.0915241	1.03846	Not significant	NO
LOC80154	-1.155	0.0915241	1.03846	Not significant	NO
LRRCC1	-0.774	0.0915241	1.03846	Not significant	NO
SOBP	-1.591	0.0915241	1.03846	Not significant	NO
ZNF473	0.469	0.0915241	1.03846	Not significant	NO
ARHGEF10	-1.449	0.0931952	1.03061	Not significant	NO
LAYN	-1.483	0.0931952	1.03061	Not significant	NO
MYO3A	-0.898	0.0931952	1.03061	Not significant	NO
NME1-NME2	-1.289	0.0931952	1.03061	Not significant	NO
ARMCX3	-0.982	0.0945258	1.02445	Not significant	NO
ZNF642	-0.616	0.0960495	1.01751	Not significant	NO
CDON	-1.408	0.100457	0.998018	Not significant	YES
SAMD12	-1.425	0.100457	0.998018	Not significant	YES
SLC15A1	-0.739	0.100457	0.998018	Not significant	NO
SPINK5	-0.698	0.100457	0.998018	Not significant	NO
ABHD8	-0.798	0.102817	0.987936	Not significant	NO
C7orf31	-0.717	0.102817	0.987936	Not significant	NO
ICA1	-1.058	0.102817	0.987936	Not significant	NO
LRP4	-1.237	0.102817	0.987936	Not significant	YES
WWOX	0.699	0.104552	0.980668	Not significant	NO
REXO2	0.452	0.106597	0.972255	Not significant	NO
FXYD2	-0.837	0.1089	0.962972	Not significant	NO
PRKD1	-1.249	0.1089	0.962972	Not significant	NO
SHC2	-1.263	0.1089	0.962972	Not significant	NO
TRO	-1.011	0.1089	0.962972	Not significant	NO
USP13	-0.389	0.1089	0.962972	Not significant	NO
ZNF808	-0.4	0.1089	0.962972	Not significant	NO
C4orf23	-0.382	0.110914	0.955015	Not significant	NO
HSDL2	0.369	0.110914	0.955015	Not significant	NO
PRAME	-0.613	0.112446	0.949057	Not significant	NO
GGT7	-0.791	0.117166	0.931197	Not significant	NO
KCNJ14	0.683	0.119566	0.922392	Not significant	NO
ADARB2	-0.971	0.124048	0.906409	Not significant	NO
HPGD	-1.124	0.124048	0.906409	Not significant	NO
ODZ2	-0.775	0.124048	0.906409	Not significant	NO
AKR1B1	-0.811	0.128954	0.889567	Not significant	NO
IGF2BP2	-0.983	0.128954	0.889567	Not significant	NO
AASS	-1.005	0.132975	0.876229	Not significant	YES
GLRB	-0.993	0.135428	0.868291	Not significant	YES
PRSS23	-0.958	0.135428	0.868291	Not significant	NO
TUB	-1.004	0.140683	0.85176	Not significant	NO
CLUAP1	-0.396	0.145741	0.836419	Not significant	NO
LOC100131691	0.667	0.145741	0.836419	Not significant	NO
RALA	0.363	0.145741	0.836419	Not significant	YES
HES4	-0.965	0.145844	0.836113	Not significant	NO
HHATL	-0.494	0.145844	0.836113	Not significant	NO
HYI	-0.771	0.145844	0.836113	Not significant	NO
PHC2	-0.44	0.145844	0.836113	Not significant	YES
KIAA1841	0.351	0.146583	0.833916	Not significant	NO
CSRP2	-0.851	0.147596	0.830926	Not significant	NO
PKIA	-0.598	0.147596	0.830926	Not significant	NO
TOR1B	0.335	0.147596	0.830926	Not significant	YES
KLHL13	-0.896	0.148067	0.829542	Not significant	NO
SCGB3A1	-0.4	0.148067	0.829542	Not significant	NO
JAM3	-0.857	0.149244	0.826104	Not significant	NO
CHMP4C	-0.861	0.150227	0.823251	Not significant	NO
LRAT	-0.438	0.151851	0.818583	Not significant	NO
SLC35F3	-0.857	0.151851	0.818583	Not significant	NO
SNCA	-0.888	0.151851	0.818583	Not significant	NO
PDLIM3	-0.857	0.151895	0.818457	Not significant	YES
WLS	-0.868	0.153737	0.813221	Not significant	NO
CNTN3	-0.515	0.158156	0.800914	Not significant	NO
MLLT3	-0.467	0.161803	0.791014	Not significant	NO
JMJD5	-0.362	0.164728	0.783232	Not significant	YES
TLE4	-0.558	0.167417	0.7762	Not significant	NO
ADCY2	-0.497	0.172028	0.764402	Not significant	NO
C10orf137	0.326	0.172028	0.764402	Not significant	NO
ETS2	-0.516	0.172028	0.764402	Not significant	NO
MFSD4	0.563	0.172028	0.764402	Not significant	NO
PPP1R3B	-0.485	0.172028	0.764402	Not significant	YES
SMG7	0.319	0.172028	0.764402	Not significant	YES
TBC1D1	-0.474	0.172028	0.764402	Not significant	NO
TMEM130	-0.518	0.172028	0.764402	Not significant	NO
UBAP2	0.323	0.172028	0.764402	Not significant	NO
UBE2Q2	0.361	0.172028	0.764402	Not significant	NO
CCDC71	-0.337	0.172131	0.76414	Not significant	NO
CHIC1	-0.376	0.172131	0.76414	Not significant	YES
MED28	-0.317	0.172131	0.76414	Not significant	NO
SVIP	-0.33	0.172131	0.76414	Not significant	YES
ZNF711	-0.56	0.172131	0.76414	Not significant	NO
ZSCAN1	-0.468	0.172131	0.76414	Not significant	YES
MAB21L2	-0.283	0.174375	0.758515	Not significant	NO
IVNS1ABP	0.454	0.17454	0.758105	Not significant	NO
LNP1	-0.571	0.17454	0.758105	Not significant	NO
PTPRZ1	-0.353	0.17454	0.758105	Not significant	NO
RGS6	-0.494	0.178089	0.749363	Not significant	NO
FAM149A	-0.635	0.185316	0.732086	Not significant	NO
JAZF1	0.375	0.185316	0.732086	Not significant	NO
WARS2	0.327	0.185316	0.732086	Not significant	NO
AFAP1L2	-0.683	0.185479	0.731705	Not significant	NO
C14orf73	-0.689	0.185479	0.731705	Not significant	NO
NSUN7	-0.662	0.185479	0.731705	Not significant	NO
SLC34A2	-0.348	0.188943	0.72367	Not significant	NO
SNRPN	-0.387	0.188943	0.72367	Not significant	NO
OXCT2	-0.504	0.189031	0.723467	Not significant	NO
ANO5	-0.588	0.190101	0.721015	Not significant	NO
LOC728855	-0.397	0.190101	0.721015	Not significant	NO
PEG3	-0.605	0.190101	0.721015	Not significant	NO
AACSL	-0.251	0.198009	0.703315	Not significant	NO
?|155060	0.362	0.19953	0.699991	Not significant	NO
CTXN1	-0.623	0.19953	0.699991	Not significant	NO
IRS2	-0.611	0.19953	0.699991	Not significant	NO
METTL8	0.335	0.19953	0.699991	Not significant	NO
SDK2	-0.628	0.19953	0.699991	Not significant	NO
PLAA	0.3	0.199961	0.699054	Not significant	NO
CLCNKB	-0.283	0.201143	0.696495	Not significant	NO
KCNB2	-0.432	0.201143	0.696495	Not significant	NO
CRCP	0.305	0.201433	0.69587	Not significant	YES
MAGED4	-0.605	0.201459	0.695814	Not significant	NO
ARMCX1	-0.546	0.202932	0.69265	Not significant	NO
RGS12	-0.495	0.2073	0.683401	Not significant	NO
RIMS2	-0.384	0.208205	0.681508	Not significant	YES
SERP1	-0.295	0.211324	0.675051	Not significant	NO
PARP11	-0.328	0.211522	0.674644	Not significant	NO
ZNF547	0.3	0.211522	0.674644	Not significant	NO
FAM3B	-0.553	0.211626	0.67443	Not significant	NO
COX6B2	-0.531	0.21983	0.657912	Not significant	NO
KIAA1377	-0.535	0.21983	0.657912	Not significant	NO
MYH6	-0.257	0.21983	0.657912	Not significant	NO
PODXL2	-0.554	0.21983	0.657912	Not significant	NO
DLK2	-0.453	0.220598	0.656398	Not significant	NO
ITFG2	-0.298	0.220598	0.656398	Not significant	NO
MAGED4B	-0.515	0.220598	0.656398	Not significant	NO
MPP6	-0.491	0.220598	0.656398	Not significant	NO
PDXDC2	0.377	0.220598	0.656398	Not significant	NO
SCUBE1	-0.258	0.220598	0.656398	Not significant	NO
UNC80	-0.474	0.220598	0.656398	Not significant	NO
HEY2	-0.53	0.225628	0.646608	Not significant	NO
FMOD	-0.534	0.226058	0.645781	Not significant	NO
NVL	0.286	0.226076	0.645746	Not significant	NO
FOXD4L2	0.479	0.226372	0.645177	Not significant	NO
FGFBP3	-0.407	0.226381	0.64516	Not significant	NO
RASSF10	-0.403	0.228196	0.641692	Not significant	NO
TAPT1	-0.284	0.228196	0.641692	Not significant	NO
TBX1	-0.293	0.228196	0.641692	Not significant	NO
ANKRD1	-0.295	0.231082	0.636234	Not significant	NO
C9orf96	0.423	0.231082	0.636234	Not significant	NO
CAV2	-0.436	0.231082	0.636234	Not significant	NO
COL11A1	-0.264	0.231082	0.636234	Not significant	NO
FAM71E2	-0.283	0.231082	0.636234	Not significant	NO
IVD	-0.33	0.231082	0.636234	Not significant	NO
NKD2	-0.49	0.231082	0.636234	Not significant	NO
PTPLA	-0.485	0.231082	0.636234	Not significant	NO
SLC16A13	0.319	0.231082	0.636234	Not significant	NO
SPOCK3	-0.224	0.231082	0.636234	Not significant	NO
SYCE1	-0.21	0.231082	0.636234	Not significant	NO
VWA2	-0.429	0.231082	0.636234	Not significant	NO
UBE2QL1	-0.497	0.232477	0.633619	Not significant	NO
EPHA7	-0.365	0.2378	0.623788	Not significant	NO
PRKD3	-0.328	0.2378	0.623788	Not significant	NO
PTPDC1	0.31	0.2378	0.623788	Not significant	NO
TMEM59L	-0.243	0.2378	0.623788	Not significant	NO
UAP1L1	0.373	0.2378	0.623788	Not significant	NO
ALPK2	-0.369	0.238629	0.622277	Not significant	NO
C3orf59	-0.404	0.238629	0.622277	Not significant	NO
ZNF469	-0.474	0.238629	0.622277	Not significant	NO
EDAR	-0.383	0.24139	0.617281	Not significant	YES
CDK2AP1	-0.275	0.24347	0.613554	Not significant	NO
RNF180	-0.466	0.243809	0.61295	Not significant	NO
PPP1R9A	-0.465	0.244175	0.612299	Not significant	NO
BEND3	-0.301	0.254727	0.593925	Not significant	NO
CRYZL1	-0.279	0.254727	0.593925	Not significant	NO
TRPS1	0.392	0.256953	0.590147	Not significant	YES
RPRM	-0.278	0.258994	0.58671	Not significant	NO
GABRA4	-0.245	0.259733	0.585473	Not significant	YES
KCNN2	-0.334	0.259733	0.585473	Not significant	NO
HPGDS	-0.431	0.261249	0.582945	Not significant	NO
MTR	0.29	0.263345	0.579476	Not significant	NO
SLC43A3	-0.334	0.263345	0.579476	Not significant	NO
FBLN7	-0.432	0.264691	0.577261	Not significant	NO
ALAD	0.263	0.265002	0.57675	Not significant	NO
COL23A1	-0.417	0.265002	0.57675	Not significant	NO
EFHA2	-0.419	0.265002	0.57675	Not significant	NO
HEATR2	0.263	0.265002	0.57675	Not significant	NO
MSX1	0.397	0.265002	0.57675	Not significant	NO
SCAND3	-0.39	0.265002	0.57675	Not significant	NO
SCN2A	-0.419	0.265002	0.57675	Not significant	NO
STRA6	-0.415	0.265002	0.57675	Not significant	NO
SALL2	-0.317	0.265708	0.575596	Not significant	NO
DNASE2	0.293	0.26631	0.574612	Not significant	NO
DNAJC18	-0.29	0.266469	0.574354	Not significant	NO
RAB3D	0.265	0.266469	0.574354	Not significant	NO
CCDC97	0.278	0.271138	0.566809	Not significant	NO
BCORL1	0.282	0.272395	0.564801	Not significant	NO
DSTYK	0.279	0.272395	0.564801	Not significant	NO
GKAP1	-0.303	0.272395	0.564801	Not significant	NO
GPR63	-0.332	0.272395	0.564801	Not significant	NO
SVOPL	-0.315	0.272395	0.564801	Not significant	NO
TRIT1	-0.258	0.272395	0.564801	Not significant	NO
ZNF385B	-0.281	0.272395	0.564801	Not significant	NO
CHKB	-0.29	0.27487	0.560873	Not significant	NO
DLX4	-0.215	0.27487	0.560873	Not significant	NO
GAL3ST3	-0.293	0.27487	0.560873	Not significant	NO
GK	-0.283	0.27487	0.560873	Not significant	YES
GDE1	-0.262	0.275129	0.560464	Not significant	NO
C16orf62	-0.265	0.279064	0.554296	Not significant	NO
PCDHGB5	-0.322	0.282485	0.549005	Not significant	NO
RPL13AP6	0.263	0.282485	0.549005	Not significant	NO
LRFN5	-0.203	0.28278	0.548551	Not significant	NO
NCRNA00092	0.379	0.288821	0.539372	Not significant	NO
C3orf15	-0.335	0.289873	0.537792	Not significant	NO
ZNF415	-0.34	0.289873	0.537792	Not significant	NO
AFF2	-0.338	0.292774	0.533468	Not significant	YES
NCRNA00086	-0.374	0.292774	0.533468	Not significant	NO
ZNF79	0.258	0.295227	0.529844	Not significant	NO
KIAA0020	0.253	0.295574	0.529333	Not significant	NO
PRKAA2	-0.368	0.295574	0.529333	Not significant	YES
SRRM5	0.273	0.295574	0.529333	Not significant	NO
NELL1	-0.22	0.296471	0.528018	Not significant	NO
ZDHHC2	-0.29	0.296471	0.528018	Not significant	NO
CMTM3	-0.268	0.297097	0.527102	Not significant	NO
LPHN1	-0.316	0.297337	0.526751	Not significant	NO
NFYB	-0.247	0.297337	0.526751	Not significant	YES
ODF2L	-0.265	0.297337	0.526751	Not significant	NO
ZNF22	-0.269	0.297337	0.526751	Not significant	NO
THSD7B	-0.334	0.297569	0.526412	Not significant	NO
LPHN3	-0.318	0.300006	0.52287	Not significant	NO
SYT1	-0.312	0.307753	0.511798	Not significant	YES
GFRA1	-0.344	0.30994	0.508723	Not significant	NO
ANGEL2	0.247	0.31314	0.504262	Not significant	NO
OXCT1	0.307	0.31314	0.504262	Not significant	YES
LRRC8D	-0.248	0.315621	0.500834	Not significant	NO
PLEKHG1	-0.271	0.315621	0.500834	Not significant	NO
CA8	-0.325	0.31755	0.498188	Not significant	NO
NOVA1	-0.335	0.31755	0.498188	Not significant	YES
PRTFDC1	-0.291	0.31755	0.498188	Not significant	NO
BST1	-0.298	0.319086	0.496093	Not significant	NO
FAM171A1	-0.322	0.319086	0.496093	Not significant	NO
PYCR1	-0.335	0.319086	0.496093	Not significant	NO
ZNF702P	-0.334	0.319086	0.496093	Not significant	NO
MPPED1	-0.237	0.321879	0.492308	Not significant	NO
CAMK1D	-0.264	0.325676	0.487215	Not significant	NO
CASP10	-0.234	0.325676	0.487215	Not significant	NO
CCDC103	-0.323	0.325676	0.487215	Not significant	NO
DDAH2	-0.248	0.325676	0.487215	Not significant	NO
HPDL	-0.313	0.325676	0.487215	Not significant	NO
IKBKAP	0.252	0.325676	0.487215	Not significant	NO
KHDRBS2	-0.297	0.325676	0.487215	Not significant	NO
PRUNE2	-0.31	0.325676	0.487215	Not significant	NO
SLC5A12	-0.263	0.325676	0.487215	Not significant	NO
TEAD4	-0.324	0.325676	0.487215	Not significant	NO
XIST	-0.171	0.325676	0.487215	Not significant	NO
CLDN10	-0.173	0.327971	0.484165	Not significant	NO
HOXD10	-0.234	0.327971	0.484165	Not significant	NO
MRI1	0.241	0.327971	0.484165	Not significant	NO
PLD2	0.248	0.330838	0.480384	Not significant	NO
RAB36	-0.285	0.332887	0.477703	Not significant	NO
CTF1	-0.253	0.334089	0.476138	Not significant	NO
LARGE	-0.312	0.334674	0.475378	Not significant	NO
ATP2C2	0.289	0.337809	0.471329	Not significant	NO
C10orf25	-0.256	0.337809	0.471329	Not significant	NO
C1QL1	-0.206	0.337809	0.471329	Not significant	NO
CCDC7	0.236	0.337809	0.471329	Not significant	NO
CLCNKA	-0.215	0.337809	0.471329	Not significant	NO
COL9A3	-0.246	0.337809	0.471329	Not significant	NO
CREB3L1	-0.268	0.337809	0.471329	Not significant	NO
KCNMB4	-0.295	0.337809	0.471329	Not significant	YES
MPP5	0.247	0.337809	0.471329	Not significant	NO
NMNAT1	0.233	0.337809	0.471329	Not significant	NO
PPP2R3A	-0.252	0.337809	0.471329	Not significant	NO
SPAG6	-0.171	0.337809	0.471329	Not significant	NO
FAM123B	0.235	0.339173	0.469579	Not significant	NO
ZNF563	0.252	0.33984	0.468726	Not significant	NO
ZNF643	-0.264	0.341511	0.466595	Not significant	NO
FBXL14	-0.225	0.342362	0.465515	Not significant	NO
RIMBP2	-0.27	0.342362	0.465515	Not significant	NO
RCL1	0.226	0.342369	0.465505	Not significant	NO
DNAH11	-0.197	0.34465	0.462622	Not significant	NO
C10orf110	0.247	0.34503	0.462143	Not significant	NO
EPS15L1	0.253	0.34503	0.462143	Not significant	NO
FIBIN	-0.282	0.34503	0.462143	Not significant	NO
FLJ35776	-0.231	0.34503	0.462143	Not significant	NO
ING1	-0.223	0.34503	0.462143	Not significant	NO
KPNA4	-0.253	0.34503	0.462143	Not significant	NO
LOC168474	0.262	0.34503	0.462143	Not significant	NO
NOL6	0.247	0.34503	0.462143	Not significant	NO
PLD5	-0.205	0.34503	0.462143	Not significant	NO
PLEKHG6	-0.274	0.34503	0.462143	Not significant	NO
SERPINF1	-0.291	0.34503	0.462143	Not significant	NO
SGCA	-0.212	0.34503	0.462143	Not significant	NO
SLC9A2	-0.197	0.34503	0.462143	Not significant	NO
TM2D2	-0.233	0.34503	0.462143	Not significant	YES
HOXD9	-0.284	0.345505	0.461545	Not significant	NO
IFNAR1	-0.241	0.346082	0.46082	Not significant	YES
ANXA3	-0.276	0.349022	0.457148	Not significant	NO
COL9A2	-0.27	0.349022	0.457148	Not significant	NO
EFCAB1	-0.264	0.349022	0.457148	Not significant	YES
LRP1B	-0.247	0.349022	0.457148	Not significant	NO
LRP2BP	-0.245	0.349022	0.457148	Not significant	NO
MAP6	-0.262	0.349022	0.457148	Not significant	NO
QPRT	-0.26	0.349022	0.457148	Not significant	NO
SCUBE3	-0.161	0.349022	0.457148	Not significant	NO
SETD1A	-0.242	0.349022	0.457148	Not significant	NO
TCTA	0.23	0.349022	0.457148	Not significant	YES
TNNI1	0.266	0.349022	0.457148	Not significant	NO
TRIM6	-0.278	0.349022	0.457148	Not significant	NO
TRPC4AP	-0.247	0.349022	0.457148	Not significant	NO
VWA3B	-0.267	0.349022	0.457148	Not significant	NO
ZNF578	-0.277	0.349022	0.457148	Not significant	NO
ZNF582	0.22	0.349022	0.457148	Not significant	NO
ZNF846	0.218	0.349022	0.457148	Not significant	NO
CAND2	-0.233	0.349129	0.457014	Not significant	NO
AGPAT4	-0.271	0.349995	0.455938	Not significant	NO
HOXA4	-0.272	0.349995	0.455938	Not significant	NO
INTS7	0.216	0.349995	0.455938	Not significant	NO
BDH2	-0.221	0.355278	0.449431	Not significant	NO
C9orf85	0.237	0.355278	0.449431	Not significant	NO
DNAH14	0.245	0.355278	0.449431	Not significant	NO
KLHL12	0.215	0.355278	0.449431	Not significant	NO
PRELID2	-0.253	0.355278	0.449431	Not significant	NO
GJA1	-0.257	0.356069	0.448465	Not significant	NO
MUTYH	-0.215	0.356069	0.448465	Not significant	NO
PROM1	-0.185	0.356069	0.448465	Not significant	NO
SCIN	-0.239	0.356069	0.448465	Not significant	NO
SMARCD1	-0.247	0.356069	0.448465	Not significant	NO
CD47	-0.218	0.356214	0.448289	Not significant	NO
LCORL	-0.224	0.356214	0.448289	Not significant	NO
TAX1BP3	-0.214	0.356214	0.448289	Not significant	NO
CPE	-0.266	0.35757	0.446639	Not significant	NO
TRHDE	-0.172	0.35757	0.446639	Not significant	YES
COL13A1	0.259	0.359009	0.444894	Not significant	NO
DACH1	-0.264	0.360672	0.442888	Not significant	NO
C2orf65	0.256	0.362191	0.441063	Not significant	NO
RNF26	-0.229	0.363418	0.439594	Not significant	NO
SORL1	-0.258	0.363418	0.439594	Not significant	YES
GNA12	0.217	0.365191	0.43748	Not significant	YES
LRRC55	-0.216	0.365191	0.43748	Not significant	NO
PFKM	-0.228	0.365191	0.43748	Not significant	NO
PPPDE1	0.231	0.365191	0.43748	Not significant	NO
PRR19	0.222	0.365191	0.43748	Not significant	NO
TRIM61	-0.253	0.365191	0.43748	Not significant	NO
SLC25A33	-0.21	0.365627	0.436962	Not significant	YES
ACCN3	0.24	0.36653	0.435891	Not significant	NO
BIK	-0.254	0.36653	0.435891	Not significant	NO
FADS1	-0.224	0.36653	0.435891	Not significant	NO
FAM101A	-0.226	0.36653	0.435891	Not significant	NO
FRMPD1	-0.206	0.36653	0.435891	Not significant	NO
GAP43	-0.161	0.36653	0.435891	Not significant	NO
INPP4A	0.207	0.36653	0.435891	Not significant	YES
KCNQ1	-0.238	0.36653	0.435891	Not significant	NO
KIF7	-0.213	0.36653	0.435891	Not significant	NO
MYBPC2	-0.211	0.36653	0.435891	Not significant	NO
PACRG	-0.193	0.36653	0.435891	Not significant	NO
PIGW	0.218	0.36653	0.435891	Not significant	NO
RGMB	-0.253	0.36653	0.435891	Not significant	NO
VASH2	-0.245	0.36653	0.435891	Not significant	YES
ZNF214	-0.239	0.36653	0.435891	Not significant	NO
PPP1R14C	-0.223	0.367207	0.435089	Not significant	NO
C8orf31	-0.197	0.367275	0.435009	Not significant	NO
DCHS2	-0.147	0.367275	0.435009	Not significant	NO
FAM132A	-0.196	0.367275	0.435009	Not significant	NO
FN1	-0.23	0.367275	0.435009	Not significant	NO
ISCU	-0.227	0.367275	0.435009	Not significant	YES
KIAA1715	0.211	0.367275	0.435009	Not significant	NO
LOC149837	-0.243	0.367275	0.435009	Not significant	NO
MLXIPL	-0.216	0.367275	0.435009	Not significant	NO
NKX2-8	-0.196	0.367275	0.435009	Not significant	NO
STX6	0.204	0.367275	0.435009	Not significant	NO
TMEM108	-0.246	0.367275	0.435009	Not significant	NO
TMPRSS2	-0.178	0.367275	0.435009	Not significant	NO
RPS6KC1	0.206	0.367316	0.434961	Not significant	NO
C11orf63	-0.203	0.371505	0.430035	Not significant	NO
FAM181B	-0.188	0.371505	0.430035	Not significant	NO
GPR85	0.212	0.371505	0.430035	Not significant	YES
HMGB3	-0.228	0.371505	0.430035	Not significant	NO
NKX3-1	-0.242	0.371505	0.430035	Not significant	NO
APEX2	0.203	0.372312	0.429093	Not significant	NO
C1orf114	-0.237	0.372312	0.429093	Not significant	NO
C1orf220	0.212	0.372312	0.429093	Not significant	NO
C6orf154	-0.17	0.372312	0.429093	Not significant	NO
GAS2	-0.241	0.372312	0.429093	Not significant	NO
HPX	0.221	0.372312	0.429093	Not significant	NO
IPO9	0.233	0.372312	0.429093	Not significant	NO
IRX1	-0.185	0.372312	0.429093	Not significant	NO
NCRNA00081	-0.209	0.372312	0.429093	Not significant	NO
NFATC1	-0.205	0.372312	0.429093	Not significant	NO
NHLRC4	-0.223	0.372312	0.429093	Not significant	NO
PRR3	-0.199	0.372312	0.429093	Not significant	NO
ZNF662	-0.229	0.372312	0.429093	Not significant	YES
NCKAP5L	-0.199	0.37526	0.425668	Not significant	NO
PUS7	0.202	0.376184	0.4246	Not significant	NO
DCAF8	0.22	0.377209	0.423418	Not significant	NO
WDR17	-0.217	0.377209	0.423418	Not significant	NO
A4GALT	-0.234	0.378109	0.422383	Not significant	NO
MAOA	-0.228	0.378109	0.422383	Not significant	NO
CXCL1	-0.166	0.37882	0.421567	Not significant	NO
SRF	-0.231	0.37882	0.421567	Not significant	NO
UNC5C	-0.157	0.37882	0.421567	Not significant	YES
HBXIP	-0.206	0.379238	0.421089	Not significant	NO
CLN5	-0.208	0.379381	0.420924	Not significant	NO
TMEM22	-0.23	0.379381	0.420924	Not significant	NO
LRFN2	-0.169	0.380727	0.419386	Not significant	NO
PIGR	-0.134	0.380727	0.419386	Not significant	NO
ITM2C	-0.212	0.381888	0.418064	Not significant	YES
BBS12	-0.201	0.384694	0.414885	Not significant	NO
GRM4	-0.175	0.384694	0.414885	Not significant	NO
C14orf129	0.219	0.384791	0.414775	Not significant	NO
EPHB1	-0.223	0.384791	0.414775	Not significant	NO
FAM19A5	-0.226	0.384791	0.414775	Not significant	NO
TPST1	-0.227	0.384791	0.414775	Not significant	NO
C11orf52	-0.211	0.385062	0.414469	Not significant	NO
PRPF38A	-0.21	0.385062	0.414469	Not significant	NO
GPR161	0.214	0.385222	0.414289	Not significant	NO
SV2A	-0.218	0.385222	0.414289	Not significant	NO
UPK2	-0.181	0.385222	0.414289	Not significant	NO
CDH8	-0.214	0.386463	0.412892	Not significant	NO
GLB1L2	-0.224	0.387008	0.41228	Not significant	NO
CCNA1	-0.158	0.388548	0.410555	Not significant	NO
APC	0.191	0.393058	0.405543	Not significant	YES
ATRNL1	-0.221	0.393058	0.405543	Not significant	NO
NDUFAF3	-0.191	0.393058	0.405543	Not significant	NO
RAP1GAP2	-0.191	0.393621	0.404922	Not significant	NO
LRRC46	-0.203	0.393681	0.404856	Not significant	NO
PTX3	-0.219	0.393681	0.404856	Not significant	NO
ACOT4	0.202	0.39551	0.402842	Not significant	NO
BCAP29	0.19	0.39551	0.402842	Not significant	YES
LPGAT1	0.19	0.39551	0.402842	Not significant	YES
SCUBE2	-0.217	0.39551	0.402842	Not significant	NO
ZNF747	-0.231	0.39551	0.402842	Not significant	NO
ADAMTS3	-0.214	0.396633	0.401611	Not significant	NO
ADM2	-0.214	0.396633	0.401611	Not significant	NO
CORO6	-0.212	0.396633	0.401611	Not significant	NO
DUSP15	-0.197	0.396633	0.401611	Not significant	NO
FHOD1	-0.202	0.396633	0.401611	Not significant	NO
HTR1F	-0.16	0.396633	0.401611	Not significant	NO
KANK4	-0.185	0.396633	0.401611	Not significant	NO
KCNA2	-0.214	0.396633	0.401611	Not significant	NO
NALCN	-0.176	0.396633	0.401611	Not significant	NO
NME5	-0.197	0.396633	0.401611	Not significant	NO
SEMA3E	-0.154	0.396633	0.401611	Not significant	YES
C1orf116	-0.145	0.396734	0.401501	Not significant	NO
GPATCH1	0.233	0.396801	0.401428	Not significant	NO
LOC100009676	-0.194	0.396801	0.401428	Not significant	NO
RALGDS	0.193	0.396801	0.401428	Not significant	NO
ZBED5	-0.215	0.396801	0.401428	Not significant	NO
GALC	-0.19	0.397377	0.400797	Not significant	NO
ID3	-0.203	0.397377	0.400797	Not significant	YES
ZNF423	-0.212	0.397377	0.400797	Not significant	NO
DHRS3	-0.199	0.398319	0.399769	Not significant	NO
PIGC	0.214	0.398319	0.399769	Not significant	NO
USP8	0.205	0.400386	0.397521	Not significant	NO
C5orf13	-0.199	0.402102	0.395663	Not significant	NO
CRYBB1	-0.185	0.402102	0.395663	Not significant	NO
GGA1	0.194	0.402102	0.395663	Not significant	NO
ST3GAL4	-0.185	0.402246	0.395508	Not significant	NO
TRIM8	-0.194	0.40266	0.395062	Not significant	NO
AKR1E2	-0.204	0.402965	0.394733	Not significant	NO
ALG11	-0.184	0.402965	0.394733	Not significant	NO
BCL2	-0.196	0.402965	0.394733	Not significant	YES
C10orf32	-0.214	0.402965	0.394733	Not significant	NO
CCBL1	0.19	0.402965	0.394733	Not significant	NO
SH3TC1	-0.192	0.402965	0.394733	Not significant	NO
BEX1	-0.2	0.403387	0.394278	Not significant	NO
CGN	-0.202	0.403387	0.394278	Not significant	NO
PLAG1	-0.206	0.403387	0.394278	Not significant	NO
CTBP1	-0.207	0.403659	0.393985	Not significant	NO
OGDHL	-0.198	0.403659	0.393985	Not significant	NO
RIMS4	-0.158	0.403659	0.393985	Not significant	NO
ZNF257	-0.2	0.403659	0.393985	Not significant	NO
ZSCAN4	-0.188	0.403659	0.393985	Not significant	NO
C8orf34	-0.14	0.404875	0.392679	Not significant	NO
LOC134466	-0.167	0.406043	0.391428	Not significant	NO
KRT13	-0.189	0.406181	0.39128	Not significant	NO
RNF10	-0.231	0.406181	0.39128	Not significant	NO
FLJ44606	0.183	0.406302	0.391151	Not significant	NO
GLIS2	-0.203	0.406302	0.391151	Not significant	NO
HIP1R	-0.182	0.406302	0.391151	Not significant	NO
POLN	0.191	0.406302	0.391151	Not significant	NO
PRIMA1	-0.181	0.406302	0.391151	Not significant	NO
SGPL1	0.183	0.406302	0.391151	Not significant	NO
TRA2B	-0.216	0.406302	0.391151	Not significant	NO
RCOR3	0.188	0.406304	0.391149	Not significant	NO
KCNC3	-0.201	0.406686	0.390741	Not significant	NO
PLEKHG4B	-0.201	0.406686	0.390741	Not significant	NO
RCOR2	-0.198	0.406686	0.390741	Not significant	NO
TMEM123	-0.182	0.406686	0.390741	Not significant	YES
SNCAIP	-0.194	0.409277	0.387983	Not significant	NO
CASP4	-0.209	0.410878	0.386287	Not significant	NO
CHI3L1	-0.172	0.410878	0.386287	Not significant	NO
DFNA5	-0.198	0.410878	0.386287	Not significant	NO
RICH2	-0.198	0.412197	0.384895	Not significant	NO
SGCE	-0.195	0.412709	0.384356	Not significant	NO
FAM120A	0.213	0.413178	0.383863	Not significant	NO
HIBADH	0.182	0.415009	0.381942	Not significant	NO
C16orf89	-0.174	0.415562	0.381364	Not significant	NO
LOC401588	0.191	0.415921	0.380989	Not significant	NO
PCDHGA12	-0.161	0.416862	0.380008	Not significant	NO
PDE6A	0.183	0.416862	0.380008	Not significant	NO
DKFZp434J0226	0.193	0.417769	0.379063	Not significant	NO
NUDT19	0.187	0.417769	0.379063	Not significant	NO
RETSAT	0.176	0.417769	0.379063	Not significant	NO
LAMB2L	0.177	0.418511	0.378294	Not significant	NO
MT3	-0.11	0.418511	0.378294	Not significant	NO
SCML1	0.177	0.418511	0.378294	Not significant	NO
ABLIM1	-0.181	0.418829	0.377963	Not significant	NO
FOXP1	-0.176	0.418829	0.377963	Not significant	NO
CCDC125	0.182	0.419531	0.377236	Not significant	NO
DDOST	-0.214	0.419531	0.377236	Not significant	NO
HTRA1	-0.182	0.419531	0.377236	Not significant	NO
IGSF1	-0.177	0.419531	0.377236	Not significant	NO
INTS10	0.198	0.419531	0.377236	Not significant	NO
LYPD6B	-0.178	0.419531	0.377236	Not significant	NO
PKD2	-0.179	0.419531	0.377236	Not significant	NO
IGFBP6	-0.173	0.420416	0.376321	Not significant	NO
ENPP1	-0.188	0.420685	0.376043	Not significant	NO
ARL9	-0.177	0.421417	0.375288	Not significant	NO
AK3	0.186	0.423527	0.373119	Not significant	NO
C1orf91	-0.173	0.423527	0.373119	Not significant	NO
CBWD3	0.173	0.423527	0.373119	Not significant	NO
DZIP1	-0.184	0.423527	0.373119	Not significant	NO
EIF4E	-0.221	0.423527	0.373119	Not significant	NO
GLRX	-0.173	0.423527	0.373119	Not significant	NO
LASS4	-0.174	0.423527	0.373119	Not significant	NO
PAK7	-0.151	0.423527	0.373119	Not significant	NO
SLC41A3	-0.189	0.423527	0.373119	Not significant	NO
TMSB15B	-0.18	0.423527	0.373119	Not significant	NO
PINK1	-0.186	0.423933	0.372703	Not significant	NO
SPA17	-0.173	0.425173	0.371434	Not significant	NO
PHC1	-0.181	0.425773	0.370822	Not significant	NO
MBD6	-0.205	0.426487	0.370094	Not significant	YES
MPPED2	-0.186	0.426487	0.370094	Not significant	YES
ZBTB41	0.171	0.426487	0.370094	Not significant	YES
RNF150	-0.182	0.42753	0.369033	Not significant	NO
TRIM13	-0.202	0.42877	0.367776	Not significant	NO
GAPVD1	0.208	0.429867	0.366666	Not significant	NO
C8orf84	-0.172	0.432536	0.363978	Not significant	NO
HMGA1	-0.173	0.432536	0.363978	Not significant	NO
XIRP1	-0.147	0.432536	0.363978	Not significant	NO
ACSS3	-0.17	0.432629	0.363884	Not significant	NO
ZKSCAN2	-0.181	0.433066	0.363446	Not significant	YES
DDX31	0.188	0.4354	0.361111	Not significant	NO
FAM83A	-0.104	0.4354	0.361111	Not significant	NO
FRMD4A	0.169	0.4354	0.361111	Not significant	NO
GBAS	0.196	0.4354	0.361111	Not significant	NO
KSR2	-0.129	0.4354	0.361111	Not significant	YES
TFR2	0.169	0.4354	0.361111	Not significant	NO
C9orf21	0.168	0.438648	0.357884	Not significant	NO
MBD1	-0.231	0.438648	0.357884	Not significant	NO
TMEM53	-0.175	0.438648	0.357884	Not significant	NO
C2orf18	-0.167	0.439504	0.357037	Not significant	NO
MYO19	0.168	0.439504	0.357037	Not significant	NO
NUP133	0.21	0.439504	0.357037	Not significant	NO
SGMS2	-0.175	0.439807	0.356738	Not significant	YES
ANKS6	0.165	0.441562	0.355009	Not significant	NO
APCDD1	-0.175	0.441562	0.355009	Not significant	NO
BAI2	-0.17	0.441562	0.355009	Not significant	NO
C11orf74	-0.184	0.441562	0.355009	Not significant	NO
C1S	-0.175	0.441562	0.355009	Not significant	NO
C5orf23	-0.169	0.441562	0.355009	Not significant	NO
CCDC136	-0.176	0.441562	0.355009	Not significant	NO
CNOT4	0.208	0.441562	0.355009	Not significant	NO
FKBP10	-0.173	0.441562	0.355009	Not significant	NO
GTF2IRD1	0.167	0.441562	0.355009	Not significant	NO
HOXA1	-0.177	0.441562	0.355009	Not significant	NO
IP6K3	-0.146	0.441562	0.355009	Not significant	NO
LOC283174	-0.175	0.441562	0.355009	Not significant	NO
MARCKSL1	-0.167	0.441562	0.355009	Not significant	NO
NOG	-0.175	0.441562	0.355009	Not significant	NO
OXNAD1	-0.167	0.441562	0.355009	Not significant	NO
PRAP1	-0.122	0.441562	0.355009	Not significant	NO
PRICKLE2	-0.175	0.441562	0.355009	Not significant	NO
RNF32	0.167	0.441562	0.355009	Not significant	NO
SCCPDH	0.173	0.441562	0.355009	Not significant	NO
SLC2A10	-0.175	0.441562	0.355009	Not significant	NO
SSRP1	-0.202	0.441562	0.355009	Not significant	NO
TBCE	0.187	0.441562	0.355009	Not significant	NO
TNFRSF10C	-0.174	0.441562	0.355009	Not significant	NO
TSKS	-0.167	0.441562	0.355009	Not significant	NO
ZNF384	-0.225	0.441562	0.355009	Not significant	NO
SNX18	0.164	0.442043	0.354535	Not significant	YES
AHCTF1	0.167	0.443838	0.352776	Not significant	NO
PCGF5	-0.191	0.448203	0.348525	Not significant	NO
AEBP1	-0.165	0.448683	0.34806	Not significant	NO
CDKL2	-0.156	0.448683	0.34806	Not significant	NO
VAPA	-0.207	0.448683	0.34806	Not significant	YES
ROR2	-0.172	0.449648	0.347128	Not significant	NO
ACVR1C	-0.17	0.450196	0.346598	Not significant	NO
APBB1	-0.16	0.450196	0.346598	Not significant	NO
C16orf72	-0.225	0.450196	0.346598	Not significant	NO
C1orf101	0.161	0.450196	0.346598	Not significant	NO
GTF2H2B	-0.171	0.450196	0.346598	Not significant	NO
KRT18	-0.17	0.450196	0.346598	Not significant	NO
PILRB	0.175	0.450196	0.346598	Not significant	NO
RNF216L	0.213	0.450196	0.346598	Not significant	NO
SDHAP1	-0.204	0.450196	0.346598	Not significant	NO
TMEM39B	-0.173	0.450196	0.346598	Not significant	NO
USP4	-0.22	0.450196	0.346598	Not significant	YES
YAF2	-0.208	0.450196	0.346598	Not significant	NO
ZNF69	-0.163	0.450196	0.346598	Not significant	NO
TMC2	0.16	0.450429	0.346373	Not significant	NO
FAR2	-0.16	0.451218	0.345614	Not significant	NO
PHEX	-0.128	0.451218	0.345614	Not significant	YES
ST6GALNAC5	-0.152	0.451218	0.345614	Not significant	NO
TMEM99	0.16	0.451532	0.345312	Not significant	NO
GNG4	-0.168	0.452477	0.344404	Not significant	NO
GNB1	-0.225	0.452679	0.34421	Not significant	NO
ITGB8	-0.148	0.453797	0.343138	Not significant	YES
KCNK17	-0.166	0.453797	0.343138	Not significant	NO
LASS1	-0.151	0.453797	0.343138	Not significant	NO
ZFR2	-0.144	0.453896	0.343044	Not significant	YES
NCRNA00087	-0.163	0.455098	0.341895	Not significant	NO
IRX5	-0.151	0.455694	0.341326	Not significant	NO
ZNF492	-0.166	0.456191	0.340853	Not significant	NO
LMO1	-0.14	0.458199	0.338946	Not significant	NO
SYCE1L	-0.166	0.458199	0.338946	Not significant	NO
TREX2	0.159	0.458199	0.338946	Not significant	NO
FGFR1	-0.164	0.458905	0.338278	Not significant	NO
AMPH	-0.158	0.459558	0.33766	Not significant	NO
ATOH8	-0.163	0.459558	0.33766	Not significant	NO
OAT	0.158	0.459558	0.33766	Not significant	NO
VCP	0.203	0.459558	0.33766	Not significant	YES
EPX	0.156	0.46051	0.336761	Not significant	NO
FAM95B1	0.164	0.46051	0.336761	Not significant	NO
SAPS3	-0.221	0.46051	0.336761	Not significant	NO
TSPAN13	-0.159	0.46051	0.336761	Not significant	NO
CXCL6	-0.131	0.46243	0.334954	Not significant	NO
CRYGN	-0.129	0.462625	0.334771	Not significant	NO
NPR3	-0.12	0.46311	0.334315	Not significant	NO
UMODL1	-0.162	0.463909	0.333567	Not significant	NO
ADHFE1	-0.156	0.464341	0.333163	Not significant	NO
CDCA7	-0.155	0.464341	0.333163	Not significant	YES
COQ10A	-0.163	0.464341	0.333163	Not significant	NO
DUS4L	0.187	0.464341	0.333163	Not significant	NO
FAM160B1	-0.167	0.464341	0.333163	Not significant	NO
FBXO28	0.173	0.464341	0.333163	Not significant	NO
ITPRIP	-0.155	0.464341	0.333163	Not significant	NO
LPAR1	-0.16	0.464341	0.333163	Not significant	NO
MRPS6	-0.16	0.464341	0.333163	Not significant	NO
PPP4R1	-0.178	0.464341	0.333163	Not significant	NO
PVRL3	-0.153	0.464341	0.333163	Not significant	NO
SAA4	-0.15	0.464341	0.333163	Not significant	NO
SF3B2	-0.203	0.464341	0.333163	Not significant	NO
SLC12A7	-0.154	0.464341	0.333163	Not significant	YES
TRIM74	0.157	0.464341	0.333163	Not significant	NO
DACT3	-0.158	0.464518	0.332997	Not significant	NO
MGRN1	-0.21	0.465179	0.33238	Not significant	YES
GPRIN2	-0.117	0.465538	0.332045	Not significant	NO
NLGN1	-0.148	0.465538	0.332045	Not significant	NO
DNAJB5	-0.155	0.465654	0.331936	Not significant	YES
NEURL	-0.159	0.465654	0.331936	Not significant	NO
TDRD7	0.161	0.465654	0.331936	Not significant	NO
PPP1R1C	-0.159	0.467604	0.330121	Not significant	NO
SLC24A3	0.158	0.468056	0.329702	Not significant	NO
ZFAT	0.153	0.468369	0.329412	Not significant	NO
WIT1	-0.121	0.468392	0.329391	Not significant	NO
NTRK3	-0.148	0.468624	0.329176	Not significant	YES
FBXL7	-0.158	0.469911	0.327984	Not significant	NO
MR1	0.152	0.469911	0.327984	Not significant	NO
SLC38A5	-0.153	0.469911	0.327984	Not significant	NO
BASP1	0.152	0.470604	0.327344	Not significant	NO
CCND2	-0.156	0.470604	0.327344	Not significant	NO
DLGAP2	-0.148	0.470604	0.327344	Not significant	NO
C19orf51	-0.13	0.471562	0.326461	Not significant	NO
GULP1	-0.152	0.471562	0.326461	Not significant	NO
B3GALNT2	0.156	0.472391	0.325698	Not significant	NO
BAMBI	-0.153	0.472391	0.325698	Not significant	NO
C16orf48	-0.15	0.472391	0.325698	Not significant	NO
C2orf81	-0.15	0.472391	0.325698	Not significant	NO
C7orf49	-0.214	0.472391	0.325698	Not significant	NO
CYYR1	-0.152	0.472391	0.325698	Not significant	YES
DYSF	0.154	0.472391	0.325698	Not significant	NO
EXOC8	0.165	0.472391	0.325698	Not significant	YES
KCTD14	-0.154	0.472391	0.325698	Not significant	NO
LOC283070	-0.15	0.472391	0.325698	Not significant	NO
LOC92973	0.15	0.472391	0.325698	Not significant	NO
MAGI3	0.15	0.472391	0.325698	Not significant	NO
MEIS3P1	-0.155	0.472391	0.325698	Not significant	NO
NEURL1B	0.153	0.472391	0.325698	Not significant	NO
SYNPO2	-0.154	0.472391	0.325698	Not significant	YES
TSNARE1	0.172	0.472391	0.325698	Not significant	NO
WASF3	-0.155	0.472391	0.325698	Not significant	NO
C1orf174	-0.201	0.47321	0.324946	Not significant	NO
CACNA1C	-0.154	0.47321	0.324946	Not significant	NO
STRBP	0.172	0.47321	0.324946	Not significant	NO
CHD4	-0.18	0.475934	0.322453	Not significant	NO
ZNF365	-0.153	0.478624	0.320006	Not significant	NO
ABTB2	-0.147	0.479126	0.31955	Not significant	NO
AP4M1	-0.166	0.479126	0.31955	Not significant	NO
ARHGAP8	-0.149	0.479126	0.31955	Not significant	NO
PHYHIPL	-0.146	0.479126	0.31955	Not significant	YES
RBM15B	-0.207	0.479126	0.31955	Not significant	NO
RECK	-0.147	0.479126	0.31955	Not significant	NO
C17orf86	0.183	0.480384	0.318411	Not significant	NO
AFF1	-0.151	0.480787	0.318048	Not significant	YES
ISM2	-0.121	0.480787	0.318048	Not significant	NO
PLSCR1	-0.147	0.480909	0.317937	Not significant	NO
LPHN2	-0.151	0.481419	0.317477	Not significant	NO
C1orf216	0.167	0.482174	0.316796	Not significant	NO
FAM55C	-0.147	0.482174	0.316796	Not significant	NO
HLA-DRB6	-0.15	0.482174	0.316796	Not significant	NO
RPS2P32	-0.147	0.482814	0.31622	Not significant	NO
TNK2	-0.171	0.482965	0.316084	Not significant	NO
MAP3K2	0.145	0.487338	0.31217	Not significant	YES
ADORA2B	-0.148	0.487981	0.311597	Not significant	NO
FGF2	-0.148	0.487981	0.311597	Not significant	YES
ZNF208	-0.143	0.487981	0.311597	Not significant	NO
C5	0.145	0.488159	0.311439	Not significant	NO
SPTLC1	0.181	0.488159	0.311439	Not significant	NO
TNFRSF19	-0.148	0.488159	0.311439	Not significant	YES
AP2M1	-0.176	0.488606	0.311041	Not significant	NO
C6orf141	-0.14	0.488608	0.31104	Not significant	NO
GPR88	-0.11	0.488608	0.31104	Not significant	NO
LOC283050	-0.146	0.488608	0.31104	Not significant	NO
MRAS	-0.144	0.489066	0.310633	Not significant	YES
LHX3	-0.089	0.490406	0.309445	Not significant	NO
ATP2B1	-0.15	0.491546	0.308436	Not significant	NO
C16orf74	-0.147	0.491546	0.308436	Not significant	NO
CRYAB	-0.137	0.491546	0.308436	Not significant	NO
NSUN6	0.166	0.491546	0.308436	Not significant	NO
TCP11	-0.117	0.491546	0.308436	Not significant	NO
ARL4A	0.144	0.491805	0.308207	Not significant	NO
BMPR1B	-0.146	0.491957	0.308072	Not significant	NO
TMCC2	0.144	0.491968	0.308063	Not significant	NO
ASXL3	-0.142	0.493845	0.306409	Not significant	YES
BAHD1	0.159	0.493845	0.306409	Not significant	NO
CAMSAP1	0.153	0.493845	0.306409	Not significant	NO
CNTNAP2	-0.145	0.493845	0.306409	Not significant	NO
IGFBP3	-0.142	0.493845	0.306409	Not significant	NO
LEKR1	-0.145	0.493845	0.306409	Not significant	NO
NPM3	-0.144	0.493845	0.306409	Not significant	NO
TXNDC12	-0.212	0.493845	0.306409	Not significant	NO
UBE2K	-0.215	0.493845	0.306409	Not significant	YES
BMPER	-0.141	0.493942	0.306324	Not significant	YES
C4orf10	-0.15	0.493942	0.306324	Not significant	NO
PCDH18	-0.141	0.493942	0.306324	Not significant	NO
SDCBP	-0.157	0.493942	0.306324	Not significant	NO
SYT7	0.137	0.493942	0.306324	Not significant	YES
TCEAL2	-0.125	0.493942	0.306324	Not significant	NO
TMEM200A	-0.144	0.493942	0.306324	Not significant	NO
FAM171A2	-0.142	0.4945	0.305834	Not significant	NO
TNFRSF1A	-0.172	0.4945	0.305834	Not significant	NO
C4orf48	-0.139	0.49607	0.304457	Not significant	NO
CRMP1	0.143	0.49607	0.304457	Not significant	NO
MFAP2	-0.142	0.49607	0.304457	Not significant	NO
NUP62CL	0.141	0.49607	0.304457	Not significant	NO
PNMA6A	-0.142	0.49607	0.304457	Not significant	NO
PP14571	-0.136	0.49607	0.304457	Not significant	NO
PRR15	-0.135	0.49607	0.304457	Not significant	NO
TOM1L2	0.153	0.49607	0.304457	Not significant	NO
TUT1	-0.19	0.49607	0.304457	Not significant	NO
VSNL1	-0.106	0.49607	0.304457	Not significant	NO
ZMIZ1	-0.145	0.49607	0.304457	Not significant	NO
ZNF76	-0.204	0.49607	0.304457	Not significant	NO
PRPF4	0.194	0.497055	0.303596	Not significant	NO
VPS24	0.172	0.500211	0.300847	Not significant	NO
IGFALS	-0.14	0.500759	0.300371	Not significant	NO
HBA1	-0.107	0.50292	0.298501	Not significant	NO
IPO8	-0.188	0.50292	0.298501	Not significant	YES
ZBTB3	-0.186	0.50292	0.298501	Not significant	NO
MMP7	-0.093	0.50552	0.296262	Not significant	NO
MFGE8	-0.141	0.505697	0.296109	Not significant	NO
NPR2	-0.139	0.505697	0.296109	Not significant	NO
SLC25A27	-0.14	0.506807	0.295157	Not significant	NO
AGK	0.154	0.507814	0.294296	Not significant	NO
C1orf133	-0.139	0.507814	0.294296	Not significant	NO
SLCO4A1	-0.138	0.507814	0.294296	Not significant	NO
ANXA11	-0.148	0.50878	0.29347	Not significant	NO
KIAA1462	-0.138	0.50878	0.29347	Not significant	NO
WDR86	-0.138	0.50878	0.29347	Not significant	NO
DFFA	-0.176	0.510972	0.291603	Not significant	NO
FAM171B	-0.138	0.510972	0.291603	Not significant	NO
HOXA10	-0.137	0.510972	0.291603	Not significant	NO
SUSD3	-0.138	0.510972	0.291603	Not significant	NO
BEST3	-0.106	0.511062	0.291527	Not significant	NO
C10orf125	-0.137	0.511062	0.291527	Not significant	NO
RARRES2	-0.135	0.511062	0.291527	Not significant	NO
RETN	-0.107	0.51438	0.288716	Not significant	NO
ZNF600	0.154	0.51438	0.288716	Not significant	NO
FKBP15	0.196	0.515349	0.287899	Not significant	NO
LOC100270746	-0.136	0.516322	0.28708	Not significant	NO
RGS20	-0.109	0.516519	0.286914	Not significant	NO
CCBE1	-0.105	0.517688	0.285932	Not significant	NO
CCDC147	-0.117	0.517688	0.285932	Not significant	YES
CTAGE5	0.174	0.517688	0.285932	Not significant	NO
DAP	-0.178	0.517688	0.285932	Not significant	NO
EHD3	0.134	0.517688	0.285932	Not significant	YES
ELFN2	-0.135	0.517688	0.285932	Not significant	NO
F3	-0.132	0.517688	0.285932	Not significant	NO
H1FX	-0.135	0.517688	0.285932	Not significant	NO
NOL8	0.192	0.517688	0.285932	Not significant	NO
OAZ3	0.135	0.517688	0.285932	Not significant	NO
P2RX2	-0.114	0.517688	0.285932	Not significant	NO
PHACTR3	-0.122	0.517688	0.285932	Not significant	YES
TLL2	-0.133	0.517688	0.285932	Not significant	NO
TMEM38A	0.136	0.517688	0.285932	Not significant	NO
ZNF525	0.18	0.517688	0.285932	Not significant	NO
KCNK12	-0.113	0.518206	0.285498	Not significant	NO
KIAA1908	0.144	0.518206	0.285498	Not significant	NO
CASP6	0.154	0.52012	0.283897	Not significant	NO
LRRC34	-0.138	0.52012	0.283897	Not significant	NO
YPEL3	-0.139	0.52012	0.283897	Not significant	NO
ZNF880	-0.143	0.523768	0.280861	Not significant	NO
GAD1	-0.097	0.524219	0.280487	Not significant	NO
ALOX12B	-0.081	0.524755	0.280043	Not significant	NO
NAP1L3	-0.133	0.524755	0.280043	Not significant	YES
TMEM98	-0.132	0.524755	0.280043	Not significant	NO
BEND6	-0.133	0.525692	0.279268	Not significant	NO
C21orf125	0.132	0.525692	0.279268	Not significant	NO
CSNK1G1	0.181	0.525692	0.279268	Not significant	NO
KCNS1	-0.103	0.525692	0.279268	Not significant	NO
NRIP2	-0.133	0.525692	0.279268	Not significant	NO
RPN1	-0.184	0.525692	0.279268	Not significant	NO
TARP	-0.133	0.525692	0.279268	Not significant	NO
FBN2	-0.118	0.526146	0.278894	Not significant	NO
TMEM201	-0.155	0.526146	0.278894	Not significant	NO
ABHD10	-0.178	0.528828	0.276686	Not significant	NO
CARHSP1	-0.131	0.528828	0.276686	Not significant	NO
LYPD3	-0.13	0.528828	0.276686	Not significant	NO
SHROOM1	0.131	0.528828	0.276686	Not significant	NO
SLC35D2	0.158	0.528828	0.276686	Not significant	NO
SPDYE5	0.142	0.528828	0.276686	Not significant	NO
TAF5L	0.17	0.528828	0.276686	Not significant	YES
ACO1	0.135	0.529112	0.276452	Not significant	NO
ESPNL	-0.129	0.530257	0.275513	Not significant	NO
PCDH9	-0.131	0.530544	0.275279	Not significant	NO
AXIN1	-0.197	0.531221	0.274725	Not significant	NO
BCAM	-0.127	0.531221	0.274725	Not significant	NO
CDK6	-0.13	0.531221	0.274725	Not significant	NO
LOC282997	-0.133	0.531221	0.274725	Not significant	NO
PCDHGB4	-0.123	0.531221	0.274725	Not significant	NO
PRMT6	-0.165	0.531221	0.274725	Not significant	NO
ADH5	-0.18	0.531846	0.274214	Not significant	NO
UBE2I	-0.169	0.533748	0.272664	Not significant	NO
ZNF521	-0.129	0.536847	0.270149	Not significant	NO
NGEF	-0.119	0.537103	0.269942	Not significant	NO
CDK7	0.156	0.537437	0.269673	Not significant	NO
ZMAT1	-0.129	0.537782	0.269393	Not significant	NO
SBK1	-0.129	0.537902	0.269297	Not significant	NO
C19orf57	0.135	0.538156	0.269092	Not significant	NO
FAM186B	0.129	0.538156	0.269092	Not significant	NO
GNPAT	0.17	0.538156	0.269092	Not significant	YES
GNPTAB	-0.167	0.538156	0.269092	Not significant	YES
MDGA1	-0.127	0.538156	0.269092	Not significant	NO
SLC7A2	-0.128	0.538156	0.269092	Not significant	NO
ZNF670	0.143	0.538156	0.269092	Not significant	NO
ANKH	-0.127	0.538836	0.268543	Not significant	YES
CLEC11A	-0.128	0.538836	0.268543	Not significant	NO
COG5	0.158	0.538836	0.268543	Not significant	NO
DEGS1	0.131	0.538836	0.268543	Not significant	NO
LIMS2	-0.128	0.538836	0.268543	Not significant	NO
MYL9	-0.128	0.538836	0.268543	Not significant	NO
OCA2	-0.103	0.538836	0.268543	Not significant	NO
SCRN3	0.145	0.538836	0.268543	Not significant	NO
SIRT2	0.163	0.538836	0.268543	Not significant	NO
SLC43A1	-0.129	0.538836	0.268543	Not significant	NO
SRL	-0.127	0.538836	0.268543	Not significant	NO
VSIG4	-0.127	0.538836	0.268543	Not significant	NO
ZNF98	-0.107	0.538836	0.268543	Not significant	NO
ZSCAN18	-0.135	0.538836	0.268543	Not significant	NO
OPA3	0.18	0.540066	0.267553	Not significant	NO
C8orf45	0.144	0.540798	0.266965	Not significant	NO
RNLS	-0.133	0.540798	0.266965	Not significant	NO
SIAH2	-0.156	0.540798	0.266965	Not significant	NO
ADRBK2	-0.141	0.54089	0.266891	Not significant	NO
CD99L2	-0.148	0.54089	0.266891	Not significant	NO
CTTNBP2	-0.126	0.54089	0.266891	Not significant	NO
IFT57	-0.15	0.54089	0.266891	Not significant	YES
LOC100128288	0.135	0.54089	0.266891	Not significant	NO
NCRNA00201	0.136	0.54089	0.266891	Not significant	NO
NNAT	-0.117	0.54089	0.266891	Not significant	NO
C17orf82	0.126	0.541167	0.266668	Not significant	NO
IQUB	-0.108	0.543301	0.26496	Not significant	NO
MAST1	0.126	0.543301	0.26496	Not significant	NO
PCSK5	-0.126	0.543301	0.26496	Not significant	NO
C1orf26	0.164	0.543689	0.26465	Not significant	NO
CNTNAP3	0.125	0.543689	0.26465	Not significant	NO
DCHS1	-0.128	0.543689	0.26465	Not significant	NO
EIF1B	-0.172	0.543689	0.26465	Not significant	NO
HOXD8	-0.125	0.543689	0.26465	Not significant	NO
MTA2	-0.176	0.543689	0.26465	Not significant	NO
UBE2L6	-0.148	0.543689	0.26465	Not significant	NO
FAM156A	0.156	0.544801	0.263762	Not significant	NO
HOXA7	-0.123	0.544801	0.263762	Not significant	NO
PANK4	-0.188	0.544801	0.263762	Not significant	NO
THY1	-0.125	0.544801	0.263762	Not significant	NO
BAT3	-0.185	0.544802	0.263761	Not significant	NO
CCDC74A	-0.124	0.544802	0.263761	Not significant	NO
CRHR1	-0.103	0.544802	0.263761	Not significant	NO
DAND5	0.124	0.544802	0.263761	Not significant	NO
EMG1	-0.139	0.544802	0.263761	Not significant	NO
GABRG3	-0.099	0.544802	0.263761	Not significant	YES
GNAI2	-0.166	0.544802	0.263761	Not significant	NO
GTF2B	-0.179	0.544802	0.263761	Not significant	NO
HSDL1	-0.169	0.544802	0.263761	Not significant	YES
INPP5E	0.177	0.544802	0.263761	Not significant	YES
LOC728606	-0.119	0.544802	0.263761	Not significant	NO
MFSD2B	-0.125	0.544802	0.263761	Not significant	NO
MYOM1	-0.126	0.544802	0.263761	Not significant	NO
PRRG1	-0.124	0.544802	0.263761	Not significant	YES
RAB3GAP2	0.142	0.544802	0.263761	Not significant	NO
REP15	-0.124	0.544802	0.263761	Not significant	NO
RNF20	0.185	0.544802	0.263761	Not significant	NO
OCIAD2	-0.13	0.545285	0.263376	Not significant	NO
OLFM2	-0.123	0.545285	0.263376	Not significant	NO
CCDC68	-0.112	0.546872	0.262114	Not significant	NO
FKBP1B	-0.125	0.546872	0.262114	Not significant	NO
KLHL32	-0.124	0.546872	0.262114	Not significant	NO
DKK3	-0.123	0.546895	0.262096	Not significant	NO
SLC22A16	-0.116	0.546895	0.262096	Not significant	NO
HEATR1	0.136	0.549512	0.260023	Not significant	NO
IQCD	-0.122	0.552796	0.257435	Not significant	NO
KCNQ5	-0.122	0.553293	0.257045	Not significant	NO
MAST2	0.149	0.553431	0.256936	Not significant	NO
PRPH2	-0.115	0.554478	0.256116	Not significant	NO
DUSP27	-0.103	0.554588	0.256029	Not significant	YES
GAS7	-0.123	0.554588	0.256029	Not significant	NO
GNA15	-0.121	0.554588	0.256029	Not significant	NO
LOC388588	-0.114	0.554588	0.256029	Not significant	NO
SELK	-0.154	0.554588	0.256029	Not significant	NO
UBAP1	0.193	0.554588	0.256029	Not significant	NO
TLR7	-0.124	0.555989	0.254934	Not significant	NO
ITGAM	-0.122	0.55634	0.25466	Not significant	NO
CAMP	-0.089	0.55715	0.254028	Not significant	NO
SFRS9	-0.166	0.558427	0.253034	Not significant	NO
SQLE	-0.125	0.558427	0.253034	Not significant	NO
CMTM2	-0.116	0.559015	0.252577	Not significant	NO
DPF2	-0.182	0.559015	0.252577	Not significant	NO
COL17A1	-0.12	0.559031	0.252564	Not significant	NO
CUTC	-0.141	0.559031	0.252564	Not significant	NO
ELAVL1	0.199	0.559031	0.252564	Not significant	NO
FANCC	0.136	0.559031	0.252564	Not significant	NO
FSD1	-0.118	0.559031	0.252564	Not significant	NO
GNB3	-0.109	0.559031	0.252564	Not significant	NO
MAPRE2	-0.123	0.559031	0.252564	Not significant	NO
OLR1	-0.115	0.559031	0.252564	Not significant	YES
TBC1D19	-0.124	0.559031	0.252564	Not significant	NO
ZHX2	0.135	0.559031	0.252564	Not significant	NO
MORF4L1	-0.179	0.559682	0.252058	Not significant	NO
MFAP4	-0.118	0.560803	0.25119	Not significant	NO
ALDH1B1	0.128	0.561455	0.250685	Not significant	NO
AOC2	0.125	0.561455	0.250685	Not significant	NO
C21orf59	-0.167	0.561455	0.250685	Not significant	NO
MGAT3	-0.115	0.561992	0.25027	Not significant	YES
RAB6C	0.123	0.563064	0.249442	Not significant	NO
RAD54B	0.124	0.563113	0.249405	Not significant	NO
FLRT2	-0.114	0.564676	0.2482	Not significant	YES
SMPD4	0.15	0.564963	0.24798	Not significant	NO
IFT122	-0.142	0.565063	0.247903	Not significant	NO
SLAIN1	-0.12	0.566176	0.247049	Not significant	NO
CD55	-0.12	0.567004	0.246414	Not significant	NO
CNST	0.166	0.567004	0.246414	Not significant	NO
GABRE	-0.109	0.567004	0.246414	Not significant	NO
GTPBP10	0.172	0.567004	0.246414	Not significant	NO
IFT140	-0.131	0.567004	0.246414	Not significant	NO
KIAA0467	-0.172	0.567004	0.246414	Not significant	NO
MBD4	-0.185	0.567004	0.246414	Not significant	NO
OSCP1	-0.129	0.567004	0.246414	Not significant	NO
ROBO1	-0.118	0.567004	0.246414	Not significant	NO
SCYL3	0.152	0.567004	0.246414	Not significant	NO
ZNF317	0.195	0.567004	0.246414	Not significant	NO
AMD1	-0.178	0.569364	0.24461	Not significant	NO
ATP2A1	-0.122	0.569364	0.24461	Not significant	NO
BANP	-0.152	0.569364	0.24461	Not significant	NO
C1orf107	0.133	0.569364	0.24461	Not significant	NO
C6orf41	-0.111	0.569364	0.24461	Not significant	NO
FAM120AOS	0.175	0.569364	0.24461	Not significant	NO
FZD5	0.116	0.569364	0.24461	Not significant	NO
KATNB1	-0.15	0.569364	0.24461	Not significant	NO
KCTD17	-0.118	0.569364	0.24461	Not significant	NO
KIAA0368	0.152	0.569364	0.24461	Not significant	NO
KIF1C	0.134	0.569364	0.24461	Not significant	NO
LIPC	-0.115	0.569364	0.24461	Not significant	NO
LOC338758	-0.127	0.569364	0.24461	Not significant	NO
LOC440173	-0.111	0.569364	0.24461	Not significant	NO
MEGF6	-0.116	0.569364	0.24461	Not significant	NO
MOCS1	-0.125	0.569364	0.24461	Not significant	NO
NR2C2AP	0.128	0.569364	0.24461	Not significant	NO
RBM11	-0.117	0.569364	0.24461	Not significant	NO
RNF5P1	-0.139	0.569364	0.24461	Not significant	NO
RNPEP	0.154	0.569364	0.24461	Not significant	NO
RUNX1	-0.159	0.569364	0.24461	Not significant	NO
RWDD2A	-0.159	0.569364	0.24461	Not significant	NO
SYN2	-0.106	0.569364	0.24461	Not significant	NO
TFB2M	0.136	0.569364	0.24461	Not significant	NO
THRB	-0.116	0.569364	0.24461	Not significant	YES
TWIST1	-0.105	0.569364	0.24461	Not significant	YES
XYLB	0.119	0.569364	0.24461	Not significant	NO
ZNF665	-0.116	0.569364	0.24461	Not significant	NO
CYP4X1	-0.106	0.569513	0.244497	Not significant	NO
IGSF11	-0.114	0.570531	0.243721	Not significant	YES
MYLK3	-0.107	0.570531	0.243721	Not significant	YES
EIF4G2	-0.169	0.570983	0.243377	Not significant	YES
MYO7B	-0.112	0.570983	0.243377	Not significant	NO
SPNS1	-0.144	0.571245	0.243178	Not significant	NO
MGC21881	0.134	0.571315	0.243124	Not significant	NO
C14orf39	-0.107	0.572922	0.241904	Not significant	NO
C17orf58	-0.114	0.572922	0.241904	Not significant	NO
C9orf6	0.17	0.572922	0.241904	Not significant	NO
LOC92249	0.15	0.572922	0.241904	Not significant	NO
MCEE	0.153	0.572922	0.241904	Not significant	NO
PLCB1	-0.115	0.572922	0.241904	Not significant	YES
PPID	-0.183	0.572922	0.241904	Not significant	NO
TAX1BP1	0.152	0.572922	0.241904	Not significant	NO
ANXA8	-0.092	0.573113	0.24176	Not significant	NO
C17orf72	-0.118	0.573113	0.24176	Not significant	NO
C18orf10	-0.14	0.573113	0.24176	Not significant	NO
FAM40A	-0.187	0.573113	0.24176	Not significant	NO
CORO2A	0.123	0.57318	0.241709	Not significant	NO
FBXO17	0.113	0.57318	0.241709	Not significant	NO
DUSP8	-0.114	0.574716	0.240547	Not significant	NO
C7orf41	-0.114	0.576494	0.239205	Not significant	NO
TMEM14B	-0.15	0.576494	0.239205	Not significant	NO
SFRP4	-0.097	0.576603	0.239123	Not significant	NO
ZNF454	-0.111	0.576603	0.239123	Not significant	NO
P4HA3	-0.102	0.576952	0.23886	Not significant	NO
SUSD4	0.113	0.577332	0.238574	Not significant	NO
YJEFN3	0.119	0.577332	0.238574	Not significant	NO
ATP5SL	0.181	0.578003	0.23807	Not significant	NO
CCDC135	-0.097	0.578003	0.23807	Not significant	NO
PCDHGA11	-0.095	0.578003	0.23807	Not significant	NO
C1orf88	-0.113	0.578283	0.237859	Not significant	NO
CADM1	-0.112	0.578283	0.237859	Not significant	YES
CAPN5	-0.124	0.578283	0.237859	Not significant	NO
CASK	0.159	0.578283	0.237859	Not significant	NO
CCNI2	0.114	0.578283	0.237859	Not significant	YES
DACT2	-0.11	0.578283	0.237859	Not significant	NO
DNAJC8	-0.155	0.578283	0.237859	Not significant	YES
ELMOD3	0.152	0.578283	0.237859	Not significant	NO
ERGIC1	-0.161	0.578283	0.237859	Not significant	NO
GPR162	-0.116	0.578283	0.237859	Not significant	NO
HGSNAT	0.13	0.578283	0.237859	Not significant	NO
IER5	0.152	0.578283	0.237859	Not significant	NO
MKRN1	0.189	0.578283	0.237859	Not significant	NO
SPCS3	-0.167	0.578283	0.237859	Not significant	NO
ACYP2	-0.135	0.578507	0.237691	Not significant	YES
PRKRIR	-0.178	0.578507	0.237691	Not significant	NO
RILPL2	-0.141	0.578507	0.237691	Not significant	NO
TNS1	-0.112	0.579481	0.236961	Not significant	NO
HPCAL4	-0.089	0.57995	0.236609	Not significant	NO
LOC100128573	0.112	0.57995	0.236609	Not significant	NO
OSGEPL1	0.175	0.57995	0.236609	Not significant	NO
SPEG	-0.111	0.579969	0.236596	Not significant	NO
TSC1	0.156	0.579969	0.236596	Not significant	NO
RBM38	-0.119	0.5808	0.235974	Not significant	YES
SEPT7P2	0.164	0.581395	0.235529	Not significant	NO
VAT1L	-0.08	0.581414	0.235515	Not significant	NO
BRD7	-0.164	0.581924	0.235134	Not significant	NO
CYB5R2	-0.106	0.581924	0.235134	Not significant	NO
FBRSL1	0.149	0.581924	0.235134	Not significant	NO
MYO1B	-0.114	0.581924	0.235134	Not significant	NO
PCDH7	-0.1	0.581924	0.235134	Not significant	YES
PSTK	-0.133	0.581924	0.235134	Not significant	NO
RAB10	0.16	0.581924	0.235134	Not significant	NO
SH3PXD2B	0.112	0.581924	0.235134	Not significant	NO
SLC29A2	-0.115	0.581924	0.235134	Not significant	NO
TMEM106C	-0.135	0.581924	0.235134	Not significant	NO
AGPAT1	-0.162	0.582206	0.234923	Not significant	NO
ALPL	-0.108	0.582206	0.234923	Not significant	NO
ANKRD53	-0.107	0.582206	0.234923	Not significant	NO
ATP2C1	0.124	0.582206	0.234923	Not significant	NO
BAG3	-0.108	0.582206	0.234923	Not significant	NO
C19orf33	-0.1	0.582206	0.234923	Not significant	NO
C20orf103	-0.103	0.582206	0.234923	Not significant	NO
CCDC64B	-0.084	0.582206	0.234923	Not significant	NO
CCND3	-0.109	0.582206	0.234923	Not significant	NO
CDC42EP5	-0.107	0.582206	0.234923	Not significant	NO
CPNE8	-0.109	0.582206	0.234923	Not significant	NO
CTGF	-0.101	0.582206	0.234923	Not significant	NO
CTH	-0.106	0.582206	0.234923	Not significant	NO
DNAJC19	-0.164	0.582206	0.234923	Not significant	YES
FAM198A	-0.11	0.582206	0.234923	Not significant	NO
FLVCR1	0.111	0.582206	0.234923	Not significant	NO
FTSJD2	-0.178	0.582206	0.234923	Not significant	NO
GABRB2	-0.095	0.582206	0.234923	Not significant	NO
GCK	-0.097	0.582206	0.234923	Not significant	NO
GLIPR1L2	-0.108	0.582206	0.234923	Not significant	YES
GLT25D1	0.154	0.582206	0.234923	Not significant	NO
GRAMD1B	-0.109	0.582206	0.234923	Not significant	NO
GRID2IP	-0.106	0.582206	0.234923	Not significant	NO
GTDC1	0.155	0.582206	0.234923	Not significant	NO
HAR1B	-0.097	0.582206	0.234923	Not significant	NO
HHAT	0.124	0.582206	0.234923	Not significant	NO
ICAM5	-0.089	0.582206	0.234923	Not significant	NO
KRTAP5-9	-0.105	0.582206	0.234923	Not significant	NO
LEPR	-0.101	0.582206	0.234923	Not significant	YES
LRRN4	-0.093	0.582206	0.234923	Not significant	NO
MAP6D1	-0.109	0.582206	0.234923	Not significant	NO
MAPK3	-0.161	0.582206	0.234923	Not significant	NO
MAT1A	-0.105	0.582206	0.234923	Not significant	NO
MGMT	-0.11	0.582206	0.234923	Not significant	NO
MSTN	0.11	0.582206	0.234923	Not significant	NO
MYLK2	-0.098	0.582206	0.234923	Not significant	NO
NAT15	-0.172	0.582206	0.234923	Not significant	NO
OLFML2A	0.11	0.582206	0.234923	Not significant	YES
PCBP2	-0.169	0.582206	0.234923	Not significant	NO
PCDHGB7	-0.098	0.582206	0.234923	Not significant	NO
PDGFRL	-0.1	0.582206	0.234923	Not significant	NO
PGAP2	0.161	0.582206	0.234923	Not significant	NO
PPT1	-0.159	0.582206	0.234923	Not significant	NO
PRODH	-0.102	0.582206	0.234923	Not significant	NO
PSMD5	0.165	0.582206	0.234923	Not significant	NO
RFX2	-0.111	0.582206	0.234923	Not significant	NO
RNF8	-0.178	0.582206	0.234923	Not significant	NO
SEMA3D	-0.09	0.582206	0.234923	Not significant	NO
SETD1B	-0.156	0.582206	0.234923	Not significant	NO
SLC3A2	-0.151	0.582206	0.234923	Not significant	NO
SMAD9	-0.085	0.582206	0.234923	Not significant	NO
SMG6	0.132	0.582206	0.234923	Not significant	NO
SNW1	0.171	0.582206	0.234923	Not significant	NO
STAB1	-0.108	0.582206	0.234923	Not significant	NO
TCEAL5	-0.107	0.582206	0.234923	Not significant	NO
TES	-0.147	0.582206	0.234923	Not significant	NO
TMEM168	0.137	0.582206	0.234923	Not significant	NO
TMEM173	-0.113	0.582206	0.234923	Not significant	NO
UBXN2A	0.161	0.582206	0.234923	Not significant	NO
ZBTB5	0.16	0.582206	0.234923	Not significant	NO
ZNF323	0.114	0.582206	0.234923	Not significant	NO
ZNF823	0.142	0.582206	0.234923	Not significant	NO
ZNF761	0.129	0.582319	0.234839	Not significant	NO
TNFRSF10D	-0.107	0.583085	0.234268	Not significant	NO
C15orf17	0.147	0.584021	0.233572	Not significant	NO
SDHAP2	-0.134	0.584367	0.233314	Not significant	NO
SCNN1A	-0.1	0.584742	0.233036	Not significant	NO
ADAM11	0.115	0.584978	0.23286	Not significant	NO
PRRX1	-0.102	0.585349	0.232585	Not significant	YES
SEC11A	0.161	0.585349	0.232585	Not significant	NO
CYP27B1	0.11	0.585554	0.232433	Not significant	NO
DNAJC2	0.174	0.586545	0.231699	Not significant	NO
ICAM2	-0.108	0.586545	0.231699	Not significant	NO
THNSL1	0.147	0.586545	0.231699	Not significant	NO
WDR92	0.169	0.586621	0.231643	Not significant	YES
CSDA	-0.125	0.587718	0.230831	Not significant	NO
AXIN2	-0.107	0.587952	0.230658	Not significant	NO
FADS2	-0.109	0.587952	0.230658	Not significant	NO
KHDRBS1	-0.155	0.587952	0.230658	Not significant	NO
MTRF1L	-0.169	0.587952	0.230658	Not significant	NO
TMEM47	-0.107	0.587952	0.230658	Not significant	NO
VCX3A	-0.094	0.587952	0.230658	Not significant	NO
FRAT1	-0.114	0.58984	0.229266	Not significant	YES
GPM6A	-0.091	0.58984	0.229266	Not significant	NO
HYOU1	-0.135	0.58984	0.229266	Not significant	NO
IL17RD	-0.096	0.58984	0.229266	Not significant	YES
LOC151174	-0.105	0.58984	0.229266	Not significant	NO
TADA3	-0.135	0.58984	0.229266	Not significant	NO
TTC9C	-0.169	0.58984	0.229266	Not significant	NO
FHDC1	-0.099	0.590854	0.22852	Not significant	NO
ANKRD45	-0.101	0.591543	0.228014	Not significant	NO
DYRK2	-0.14	0.591543	0.228014	Not significant	YES
FAM86B1	-0.109	0.591543	0.228014	Not significant	NO
FUT1	0.105	0.591543	0.228014	Not significant	NO
GEMIN8P4	-0.117	0.591543	0.228014	Not significant	NO
HKR1	0.179	0.591543	0.228014	Not significant	NO
LRRC27	-0.131	0.591543	0.228014	Not significant	NO
MED31	0.151	0.591543	0.228014	Not significant	YES
MST4	-0.108	0.591543	0.228014	Not significant	NO
PKP1	0.107	0.591543	0.228014	Not significant	YES
PLSCR4	-0.103	0.591543	0.228014	Not significant	NO
PRAM1	-0.109	0.591543	0.228014	Not significant	NO
USP38	-0.147	0.591543	0.228014	Not significant	NO
WIZ	0.179	0.591543	0.228014	Not significant	NO
ZNF571	0.147	0.591543	0.228014	Not significant	NO
CPLX1	-0.102	0.591791	0.227832	Not significant	NO
?|10357	-0.113	0.59201	0.227671	Not significant	NO
ABR	0.123	0.59201	0.227671	Not significant	NO
ACADVL	0.117	0.59201	0.227671	Not significant	NO
APBA1	0.106	0.59201	0.227671	Not significant	YES
ATG2A	-0.159	0.59201	0.227671	Not significant	YES
ATP1A1	0.112	0.59201	0.227671	Not significant	NO
BAT4	-0.11	0.59201	0.227671	Not significant	NO
BMP2	-0.098	0.59201	0.227671	Not significant	NO
C10orf68	0.111	0.59201	0.227671	Not significant	NO
C11orf10	-0.123	0.59201	0.227671	Not significant	NO
C11orf57	-0.17	0.59201	0.227671	Not significant	NO
C1orf144	-0.175	0.59201	0.227671	Not significant	NO
C1orf228	-0.099	0.59201	0.227671	Not significant	NO
C1orf229	0.099	0.59201	0.227671	Not significant	NO
C20orf203	-0.104	0.59201	0.227671	Not significant	NO
C3	-0.099	0.59201	0.227671	Not significant	NO
C4orf31	-0.09	0.59201	0.227671	Not significant	NO
C9orf150	-0.099	0.59201	0.227671	Not significant	NO
CA12	-0.083	0.59201	0.227671	Not significant	NO
CABC1	0.124	0.59201	0.227671	Not significant	NO
CC2D1A	0.142	0.59201	0.227671	Not significant	NO
CDHR3	0.099	0.59201	0.227671	Not significant	NO
CDR2	-0.115	0.59201	0.227671	Not significant	NO
CES8	0.101	0.59201	0.227671	Not significant	NO
CFH	-0.099	0.59201	0.227671	Not significant	NO
CHDH	-0.098	0.59201	0.227671	Not significant	NO
CHRNA9	-0.083	0.59201	0.227671	Not significant	NO
CHUK	-0.154	0.59201	0.227671	Not significant	YES
CILP2	-0.096	0.59201	0.227671	Not significant	NO
CLDN4	-0.089	0.59201	0.227671	Not significant	NO
CMAS	-0.158	0.59201	0.227671	Not significant	NO
CMIP	-0.143	0.59201	0.227671	Not significant	NO
CNO	-0.16	0.59201	0.227671	Not significant	NO
CNPY4	-0.128	0.59201	0.227671	Not significant	NO
COL22A1	-0.091	0.59201	0.227671	Not significant	NO
CPA4	-0.093	0.59201	0.227671	Not significant	NO
CPAMD8	-0.094	0.59201	0.227671	Not significant	NO
CUL1	0.169	0.59201	0.227671	Not significant	NO
CYP39A1	-0.087	0.59201	0.227671	Not significant	NO
DDX58	0.099	0.59201	0.227671	Not significant	NO
DPH3	-0.161	0.59201	0.227671	Not significant	NO
DTNBP1	-0.118	0.59201	0.227671	Not significant	NO
ELOVL6	0.113	0.59201	0.227671	Not significant	NO
EPHA2	-0.101	0.59201	0.227671	Not significant	NO
EPHX4	0.096	0.59201	0.227671	Not significant	NO
ERAP2	-0.102	0.59201	0.227671	Not significant	NO
FAM189A2	-0.103	0.59201	0.227671	Not significant	YES
FAM35B	-0.163	0.59201	0.227671	Not significant	NO
FAM69A	-0.117	0.59201	0.227671	Not significant	NO
FBN3	-0.085	0.59201	0.227671	Not significant	NO
FDX1	-0.164	0.59201	0.227671	Not significant	NO
FGFBP2	-0.097	0.59201	0.227671	Not significant	NO
FNDC8	0.116	0.59201	0.227671	Not significant	NO
FUNDC2P2	0.113	0.59201	0.227671	Not significant	NO
GABARAPL2	-0.167	0.59201	0.227671	Not significant	NO
GALM	-0.114	0.59201	0.227671	Not significant	NO
GDF11	-0.113	0.59201	0.227671	Not significant	NO
GLE1	0.156	0.59201	0.227671	Not significant	NO
GLT8D1	-0.162	0.59201	0.227671	Not significant	NO
GNE	-0.124	0.59201	0.227671	Not significant	NO
GPLD1	0.101	0.59201	0.227671	Not significant	YES
H2BFXP	-0.1	0.59201	0.227671	Not significant	NO
HLA-DQB2	-0.1	0.59201	0.227671	Not significant	NO
HPCAL1	-0.114	0.59201	0.227671	Not significant	NO
HRK	-0.092	0.59201	0.227671	Not significant	NO
HUS1B	-0.092	0.59201	0.227671	Not significant	NO
IER3	-0.106	0.59201	0.227671	Not significant	NO
IFITM2	-0.11	0.59201	0.227671	Not significant	NO
IL17REL	-0.088	0.59201	0.227671	Not significant	NO
IP6K1	-0.161	0.59201	0.227671	Not significant	NO
ISY1	-0.154	0.59201	0.227671	Not significant	NO
KIAA0528	0.107	0.59201	0.227671	Not significant	NO
KIAA1549	0.102	0.59201	0.227671	Not significant	YES
KIT	-0.082	0.59201	0.227671	Not significant	YES
KLF15	-0.096	0.59201	0.227671	Not significant	NO
KRT71	-0.081	0.59201	0.227671	Not significant	YES
LOC158376	-0.1	0.59201	0.227671	Not significant	NO
LPCAT1	0.126	0.59201	0.227671	Not significant	NO
LRCH4	-0.149	0.59201	0.227671	Not significant	NO
MAP1A	-0.098	0.59201	0.227671	Not significant	NO
MAP7D1	-0.143	0.59201	0.227671	Not significant	NO
MC4R	-0.091	0.59201	0.227671	Not significant	NO
MGC12982	-0.1	0.59201	0.227671	Not significant	NO
MKS1	-0.157	0.59201	0.227671	Not significant	NO
MMP23B	-0.098	0.59201	0.227671	Not significant	NO
MRPL32	0.139	0.59201	0.227671	Not significant	NO
MYST4	-0.117	0.59201	0.227671	Not significant	NO
NAPEPLD	0.158	0.59201	0.227671	Not significant	NO
NEDD4L	-0.101	0.59201	0.227671	Not significant	NO
NFX1	0.178	0.59201	0.227671	Not significant	YES
NKAIN2	-0.094	0.59201	0.227671	Not significant	NO
NRBP2	0.108	0.59201	0.227671	Not significant	NO
NRP2	-0.099	0.59201	0.227671	Not significant	NO
NUDT10	-0.103	0.59201	0.227671	Not significant	NO
NUMBL	0.117	0.59201	0.227671	Not significant	YES
OR13A1	-0.097	0.59201	0.227671	Not significant	NO
PAMR1	-0.096	0.59201	0.227671	Not significant	NO
PEX5L	-0.097	0.59201	0.227671	Not significant	YES
PHRF1	-0.17	0.59201	0.227671	Not significant	NO
PIK3R2	0.124	0.59201	0.227671	Not significant	NO
PMPCB	0.179	0.59201	0.227671	Not significant	NO
PPHLN1	-0.168	0.59201	0.227671	Not significant	NO
PRR5	-0.107	0.59201	0.227671	Not significant	NO
PTGR1	0.103	0.59201	0.227671	Not significant	NO
PTPLAD2	-0.116	0.59201	0.227671	Not significant	NO
RASL11A	-0.1	0.59201	0.227671	Not significant	NO
RIBC2	0.105	0.59201	0.227671	Not significant	NO
RINT1	0.152	0.59201	0.227671	Not significant	NO
RNF149	0.148	0.59201	0.227671	Not significant	YES
RNF5	-0.125	0.59201	0.227671	Not significant	NO
RRP15	0.15	0.59201	0.227671	Not significant	NO
SCHIP1	-0.099	0.59201	0.227671	Not significant	NO
SH2D3A	-0.101	0.59201	0.227671	Not significant	NO
SHF	-0.099	0.59201	0.227671	Not significant	NO
SLC8A3	-0.092	0.59201	0.227671	Not significant	NO
SMPDL3A	0.103	0.59201	0.227671	Not significant	NO
SPINK2	-0.097	0.59201	0.227671	Not significant	NO
SPTLC3	-0.102	0.59201	0.227671	Not significant	YES
ST8SIA2	-0.101	0.59201	0.227671	Not significant	YES
SUFU	-0.145	0.59201	0.227671	Not significant	NO
TBL1XR1	-0.17	0.59201	0.227671	Not significant	YES
TEX261	0.181	0.59201	0.227671	Not significant	NO
TGFBI	0.103	0.59201	0.227671	Not significant	NO
TLE2	0.105	0.59201	0.227671	Not significant	NO
TMEM200C	-0.09	0.59201	0.227671	Not significant	NO
TMEM204	-0.101	0.59201	0.227671	Not significant	NO
TRPT1	-0.113	0.59201	0.227671	Not significant	NO
TSPAN11	-0.101	0.59201	0.227671	Not significant	NO
TTC31	0.189	0.59201	0.227671	Not significant	YES
TUBB6	-0.107	0.59201	0.227671	Not significant	NO
TXNDC11	-0.148	0.59201	0.227671	Not significant	NO
UBE2D3	-0.19	0.59201	0.227671	Not significant	YES
UNC13B	0.108	0.59201	0.227671	Not significant	NO
URGCP	0.145	0.59201	0.227671	Not significant	NO
USP25	-0.122	0.59201	0.227671	Not significant	YES
VEGFC	-0.101	0.59201	0.227671	Not significant	NO
VPS37D	0.106	0.59201	0.227671	Not significant	NO
WBP2NL	-0.098	0.59201	0.227671	Not significant	NO
WT1	-0.097	0.59201	0.227671	Not significant	NO
ZC4H2	-0.104	0.59201	0.227671	Not significant	NO
ZCCHC3	-0.157	0.59201	0.227671	Not significant	NO
ZNF527	0.174	0.59201	0.227671	Not significant	NO
ZNF546	0.143	0.59201	0.227671	Not significant	NO
ZNF554	0.173	0.59201	0.227671	Not significant	NO
ZNF562	0.159	0.59201	0.227671	Not significant	NO
ZNRD1	-0.112	0.59201	0.227671	Not significant	NO
ZSCAN20	-0.115	0.59201	0.227671	Not significant	NO
ZSCAN22	0.152	0.59201	0.227671	Not significant	NO
ANGPTL2	0.102	0.59242	0.22737	Not significant	NO
BCL7A	-0.121	0.59242	0.22737	Not significant	YES
C19orf71	0.114	0.59242	0.22737	Not significant	NO
CCNO	-0.077	0.59242	0.22737	Not significant	NO
CLEC16A	-0.146	0.59242	0.22737	Not significant	NO
FLJ22536	-0.097	0.59242	0.22737	Not significant	NO
H2AFX	-0.099	0.59242	0.22737	Not significant	NO
NINJ2	-0.102	0.59242	0.22737	Not significant	NO
PDE6B	-0.108	0.59242	0.22737	Not significant	NO
PIH1D2	-0.101	0.59242	0.22737	Not significant	YES
SDHC	0.134	0.59242	0.22737	Not significant	YES
SLC34A3	0.096	0.59242	0.22737	Not significant	NO
SLC36A1	0.103	0.59242	0.22737	Not significant	NO
SMARCC2	-0.169	0.59242	0.22737	Not significant	YES
VEPH1	-0.085	0.59242	0.22737	Not significant	NO
ZNF114	-0.093	0.59242	0.22737	Not significant	NO
BAI1	0.09	0.592915	0.227007	Not significant	NO
BMP8A	-0.098	0.592915	0.227007	Not significant	NO
C12orf24	-0.104	0.592915	0.227007	Not significant	NO
C12orf39	-0.087	0.592915	0.227007	Not significant	NO
CKMT2	-0.089	0.592915	0.227007	Not significant	NO
FGF18	-0.092	0.592915	0.227007	Not significant	NO
IFITM1	-0.102	0.592915	0.227007	Not significant	NO
SH3D19	-0.098	0.592915	0.227007	Not significant	NO
FLJ33360	0.099	0.593199	0.226799	Not significant	NO
LRRC8B	-0.104	0.593199	0.226799	Not significant	YES
SPSB3	-0.112	0.593502	0.226578	Not significant	NO
ENAH	0.097	0.594477	0.225865	Not significant	YES
GRIN2A	-0.085	0.594477	0.225865	Not significant	NO
LARS	0.169	0.594477	0.225865	Not significant	NO
RPL39L	-0.096	0.594477	0.225865	Not significant	NO
ABCC4	-0.097	0.594924	0.225539	Not significant	YES
PSMD14	0.153	0.594924	0.225539	Not significant	NO
TRIM46	-0.099	0.594924	0.225539	Not significant	NO
LZTFL1	-0.107	0.59502	0.225469	Not significant	NO
AKAP8	0.175	0.596155	0.224641	Not significant	NO
ANTXR1	-0.096	0.596155	0.224641	Not significant	NO
ATP1A3	0.096	0.596155	0.224641	Not significant	NO
C5orf62	-0.102	0.596155	0.224641	Not significant	NO
CHCHD7	-0.133	0.596155	0.224641	Not significant	NO
DNM1P35	0.115	0.596155	0.224641	Not significant	NO
EEF2	0.162	0.596155	0.224641	Not significant	NO
ENO1	-0.115	0.596155	0.224641	Not significant	NO
FAAH	-0.099	0.596155	0.224641	Not significant	NO
FLJ36031	-0.113	0.596155	0.224641	Not significant	NO
GLI2	0.096	0.596155	0.224641	Not significant	NO
HHIPL1	-0.096	0.596155	0.224641	Not significant	NO
HNRPDL	-0.17	0.596155	0.224641	Not significant	NO
ILDR2	-0.085	0.596155	0.224641	Not significant	YES
ITGA2B	-0.092	0.596155	0.224641	Not significant	NO
LOC550112	-0.154	0.596155	0.224641	Not significant	NO
MCRS1	-0.135	0.596155	0.224641	Not significant	NO
PAFAH1B1	0.157	0.596155	0.224641	Not significant	NO
PELI2	-0.098	0.596155	0.224641	Not significant	NO
PNPLA2	-0.124	0.596155	0.224641	Not significant	NO
RASAL2	0.096	0.596155	0.224641	Not significant	NO
REEP2	-0.093	0.596155	0.224641	Not significant	NO
SNHG6	-0.104	0.596155	0.224641	Not significant	NO
SNHG7	-0.11	0.596155	0.224641	Not significant	NO
SYF2	-0.16	0.596155	0.224641	Not significant	YES
TGFB2	-0.092	0.596155	0.224641	Not significant	NO
TMEM223	-0.124	0.596155	0.224641	Not significant	NO
TSPYL4	-0.111	0.596155	0.224641	Not significant	NO
TTLL7	-0.081	0.596155	0.224641	Not significant	NO
UAP1	0.125	0.596155	0.224641	Not significant	NO
WDR54	-0.097	0.596155	0.224641	Not significant	NO
ABCG2	-0.099	0.596316	0.224523	Not significant	NO
ARSJ	-0.092	0.596316	0.224523	Not significant	YES
CXorf23	0.126	0.596316	0.224523	Not significant	NO
GXYLT2	-0.098	0.596316	0.224523	Not significant	NO
ITGB4	-0.094	0.596316	0.224523	Not significant	NO
KIAA0495	-0.1	0.596316	0.224523	Not significant	NO
LINS1	-0.149	0.596316	0.224523	Not significant	NO
PLLP	-0.095	0.596316	0.224523	Not significant	NO
PSD2	-0.094	0.596316	0.224523	Not significant	NO
SLC25A12	0.146	0.596316	0.224523	Not significant	NO
ST3GAL6	-0.098	0.596316	0.224523	Not significant	NO
TPST2	0.101	0.596316	0.224523	Not significant	NO
NHSL1	0.099	0.597084	0.223965	Not significant	NO
ADORA3	-0.097	0.59743	0.223713	Not significant	NO
CNIH4	0.136	0.597514	0.223652	Not significant	NO
CCDC48	-0.095	0.59853	0.222914	Not significant	NO
PRG2	-0.093	0.59853	0.222914	Not significant	NO
PTPMT1	-0.138	0.59853	0.222914	Not significant	NO
RPP25	0.096	0.59853	0.222914	Not significant	NO
SPTBN4	0.095	0.59853	0.222914	Not significant	NO
USP7	-0.135	0.59853	0.222914	Not significant	NO
ARMC10	0.174	0.598811	0.22271	Not significant	NO
C10orf78	-0.134	0.598811	0.22271	Not significant	NO
EPHX3	-0.091	0.598811	0.22271	Not significant	NO
POMC	0.094	0.598811	0.22271	Not significant	NO
ZNF544	0.18	0.598811	0.22271	Not significant	NO
CHRM5	0.104	0.600426	0.22154	Not significant	NO
LEPREL2	-0.091	0.600426	0.22154	Not significant	NO
VPS26A	0.182	0.601489	0.220772	Not significant	NO
POLR3G	0.124	0.601523	0.220748	Not significant	NO
LRRN1	-0.095	0.601823	0.220531	Not significant	NO
OSGIN1	-0.095	0.601823	0.220531	Not significant	NO
PDZRN3	0.092	0.601823	0.220531	Not significant	NO
RRN3P3	-0.104	0.601823	0.220531	Not significant	NO
SPDYE1	0.125	0.601823	0.220531	Not significant	NO
TREML1	-0.083	0.601823	0.220531	Not significant	NO
ASTE1	-0.154	0.603074	0.21963	Not significant	NO
CADM4	0.096	0.603074	0.21963	Not significant	NO
GLRA3	-0.08	0.603074	0.21963	Not significant	NO
GSC	-0.078	0.603074	0.21963	Not significant	YES
LOC441666	-0.09	0.603074	0.21963	Not significant	NO
PBX2	-0.163	0.603074	0.21963	Not significant	NO
PMS2CL	-0.131	0.603074	0.21963	Not significant	NO
POLR2C	-0.159	0.603074	0.21963	Not significant	NO
RAB17	-0.092	0.603074	0.21963	Not significant	NO
RAB27B	-0.072	0.603074	0.21963	Not significant	YES
STAG3	-0.095	0.603074	0.21963	Not significant	NO
STK38L	-0.105	0.603074	0.21963	Not significant	YES
SVIL	-0.096	0.603074	0.21963	Not significant	NO
ZCCHC12	-0.084	0.603074	0.21963	Not significant	NO
DNAJB11	-0.147	0.604541	0.218574	Not significant	NO
C1orf124	0.114	0.604789	0.218396	Not significant	NO
MLF2	-0.132	0.605104	0.21817	Not significant	NO
CCT6A	0.157	0.605206	0.218097	Not significant	YES
GGPS1	0.164	0.605206	0.218097	Not significant	NO
LASS5	-0.123	0.605206	0.218097	Not significant	NO
NDEL1	0.148	0.605206	0.218097	Not significant	NO
PIK3R6	-0.096	0.605206	0.218097	Not significant	NO
TRIM7	0.091	0.605206	0.218097	Not significant	NO
ANGPT2	-0.09	0.605551	0.217849	Not significant	NO
BFSP2	-0.084	0.605551	0.217849	Not significant	NO
SLC16A3	-0.103	0.605551	0.217849	Not significant	NO
MLL4	0.164	0.605792	0.217676	Not significant	NO
CHD1L	0.135	0.606747	0.216992	Not significant	NO
TSC2	-0.106	0.607494	0.216458	Not significant	NO
WBP11	-0.159	0.607494	0.216458	Not significant	NO
SLC16A10	-0.096	0.607697	0.216313	Not significant	NO
CDK2AP2	-0.101	0.608298	0.215884	Not significant	NO
CHPT1	-0.101	0.608298	0.215884	Not significant	NO
DSP	0.094	0.608298	0.215884	Not significant	NO
FAM184A	-0.092	0.608298	0.215884	Not significant	NO
GJA3	-0.075	0.608298	0.215884	Not significant	YES
HNRNPUL2	-0.169	0.608298	0.215884	Not significant	NO
LRRN2	-0.092	0.608298	0.215884	Not significant	YES
NRG2	-0.09	0.608298	0.215884	Not significant	NO
NRGN	-0.093	0.608298	0.215884	Not significant	NO
PTER	-0.105	0.608298	0.215884	Not significant	NO
PTPN4	0.144	0.608298	0.215884	Not significant	NO
RNF40	-0.177	0.608298	0.215884	Not significant	NO
RUNX2	-0.097	0.608298	0.215884	Not significant	YES
SELT	-0.16	0.608298	0.215884	Not significant	YES
SRCAP	-0.165	0.608298	0.215884	Not significant	NO
TOE1	-0.142	0.608298	0.215884	Not significant	NO
TBXAS1	-0.106	0.608705	0.215593	Not significant	NO
METTL7A	-0.097	0.608747	0.215563	Not significant	NO
CCDC93	0.139	0.60997	0.214691	Not significant	NO
CCNJL	-0.094	0.60997	0.214691	Not significant	NO
LRG1	-0.087	0.60997	0.214691	Not significant	NO
MAGEF1	-0.143	0.60997	0.214691	Not significant	NO
PAQR6	0.093	0.60997	0.214691	Not significant	NO
PLEKHM2	-0.168	0.60997	0.214691	Not significant	NO
CDK11B	-0.148	0.610483	0.214326	Not significant	NO
PON1	-0.086	0.610701	0.214171	Not significant	NO
IARS2	0.111	0.611389	0.213683	Not significant	NO
C5orf28	0.13	0.611433	0.213651	Not significant	NO
ROR1	-0.082	0.61194	0.213291	Not significant	YES
SLC9A9	-0.095	0.61194	0.213291	Not significant	NO
SLC44A3	0.091	0.611964	0.213274	Not significant	NO
C2CD4C	0.091	0.612472	0.212914	Not significant	NO
FAM71F2	0.091	0.614055	0.211793	Not significant	NO
GYG2	0.091	0.614055	0.211793	Not significant	NO
NECAB1	-0.09	0.614055	0.211793	Not significant	NO
NTNG2	-0.091	0.614055	0.211793	Not significant	NO
NUDT11	-0.09	0.614055	0.211793	Not significant	YES
PTPN21	-0.089	0.614055	0.211793	Not significant	YES
XPNPEP2	-0.089	0.614055	0.211793	Not significant	NO
PLEKHO1	-0.094	0.614415	0.211538	Not significant	NO
SH3BP5L	0.156	0.614415	0.211538	Not significant	NO
WDR73	-0.163	0.615483	0.210784	Not significant	NO
TJP2	0.107	0.616349	0.210173	Not significant	NO
EIF1AD	-0.157	0.617113	0.209636	Not significant	NO
FOXD4L6	0.092	0.617113	0.209636	Not significant	NO
GRIN2D	-0.086	0.617113	0.209636	Not significant	NO
MT1F	-0.093	0.617113	0.209636	Not significant	NO
PLA2R1	-0.086	0.617113	0.209636	Not significant	NO
PRICKLE1	-0.09	0.617113	0.209636	Not significant	NO
PTPN3	0.099	0.617113	0.209636	Not significant	NO
TAF8	-0.129	0.617113	0.209636	Not significant	NO
C2orf16	-0.097	0.617577	0.209309	Not significant	NO
CLEC4G	-0.073	0.617577	0.209309	Not significant	NO
RAPGEF5	0.1	0.617577	0.209309	Not significant	NO
RRAGB	0.111	0.617577	0.209309	Not significant	NO
WDR90	-0.132	0.617577	0.209309	Not significant	NO
ABCB10	0.129	0.618061	0.208968	Not significant	NO
ARV1	0.111	0.618061	0.208968	Not significant	NO
CCDC23	-0.103	0.618061	0.208968	Not significant	NO
CNNM1	-0.083	0.618061	0.208968	Not significant	NO
D4S234E	-0.088	0.618061	0.208968	Not significant	NO
DDX23	-0.148	0.618061	0.208968	Not significant	NO
DTWD1	-0.156	0.618061	0.208968	Not significant	NO
EFEMP2	-0.092	0.618061	0.208968	Not significant	NO
FLJ37453	-0.1	0.618061	0.208968	Not significant	NO
GNG7	-0.091	0.618061	0.208968	Not significant	NO
JMJD8	-0.107	0.618061	0.208968	Not significant	NO
LOC147804	0.122	0.618061	0.208968	Not significant	NO
LOC153684	-0.094	0.618061	0.208968	Not significant	NO
MPP2	-0.088	0.618061	0.208968	Not significant	NO
MYO1A	-0.087	0.618061	0.208968	Not significant	NO
NCCRP1	-0.084	0.618061	0.208968	Not significant	YES
OGT	0.126	0.618061	0.208968	Not significant	NO
OSTC	-0.139	0.618061	0.208968	Not significant	NO
PARL	-0.133	0.618061	0.208968	Not significant	NO
PTPRN2	-0.09	0.618061	0.208968	Not significant	NO
RCAN1	-0.094	0.618061	0.208968	Not significant	NO
RHBDL3	-0.087	0.618061	0.208968	Not significant	NO
SCN7A	-0.074	0.618061	0.208968	Not significant	NO
SEP15	-0.159	0.618061	0.208968	Not significant	NO
SLC30A9	-0.15	0.618061	0.208968	Not significant	YES
SNTA1	-0.091	0.618061	0.208968	Not significant	NO
SYT2	-0.085	0.618061	0.208968	Not significant	YES
TMEM25	-0.116	0.618061	0.208968	Not significant	NO
TMEM97	0.108	0.618061	0.208968	Not significant	NO
TTC15	0.115	0.618061	0.208968	Not significant	NO
UBQLN1	0.164	0.618061	0.208968	Not significant	YES
VAMP5	-0.091	0.618061	0.208968	Not significant	NO
VEZT	-0.127	0.618061	0.208968	Not significant	NO
VSIG2	-0.071	0.618061	0.208968	Not significant	NO
ZNF584	0.15	0.618061	0.208968	Not significant	NO
B3GNT1	-0.096	0.618615	0.20858	Not significant	NO
LDLR	-0.093	0.618853	0.208412	Not significant	NO
CPSF3L	-0.126	0.619234	0.208146	Not significant	NO
FAM163A	0.089	0.619259	0.208127	Not significant	NO
OSBPL3	0.101	0.619502	0.207957	Not significant	YES
ACY3	-0.091	0.619502	0.207957	Not significant	NO
SMARCA2	0.11	0.619778	0.207764	Not significant	NO
TMLHE	0.119	0.619816	0.207737	Not significant	NO
APTX	0.137	0.620565	0.207213	Not significant	NO
C14orf19	0.118	0.620565	0.207213	Not significant	NO
DHX29	0.127	0.620565	0.207213	Not significant	NO
DOK7	-0.087	0.620565	0.207213	Not significant	NO
EFEMP1	0.086	0.620565	0.207213	Not significant	NO
FAM167A	-0.088	0.620565	0.207213	Not significant	NO
KRTAP5-10	-0.079	0.620565	0.207213	Not significant	NO
LZTS1	-0.088	0.620565	0.207213	Not significant	NO
MLPH	0.084	0.620565	0.207213	Not significant	YES
UBTD2	0.127	0.620565	0.207213	Not significant	YES
VN1R1	0.1	0.620565	0.207213	Not significant	NO
ZNF419	0.171	0.620565	0.207213	Not significant	NO
B9D2	-0.094	0.620722	0.207103	Not significant	NO
C3orf34	-0.105	0.620722	0.207103	Not significant	NO
CCDC88A	-0.1	0.620722	0.207103	Not significant	NO
SLIT2	-0.077	0.620722	0.207103	Not significant	NO
ZMYND8	-0.115	0.620722	0.207103	Not significant	NO
DOCK5	0.091	0.621137	0.206813	Not significant	NO
ZNF330	-0.151	0.621137	0.206813	Not significant	NO
C3orf26	-0.146	0.622283	0.206012	Not significant	NO
RAB7A	-0.164	0.622317	0.205988	Not significant	NO
DDIT4	-0.095	0.622924	0.205565	Not significant	NO
AVPR1A	-0.08	0.623138	0.205416	Not significant	NO
C1orf95	-0.082	0.623138	0.205416	Not significant	NO
C6orf225	-0.108	0.623138	0.205416	Not significant	NO
C9orf122	0.087	0.623138	0.205416	Not significant	NO
C9orf45	0.098	0.623138	0.205416	Not significant	NO
COMMD9	-0.127	0.623138	0.205416	Not significant	NO
CX3CR1	-0.083	0.623138	0.205416	Not significant	NO
DTX4	-0.085	0.623138	0.205416	Not significant	NO
EPB41L3	0.093	0.623138	0.205416	Not significant	NO
EPO	0.091	0.623138	0.205416	Not significant	NO
ESYT3	-0.078	0.623138	0.205416	Not significant	NO
FAM126A	-0.1	0.623138	0.205416	Not significant	NO
FBXL19	-0.127	0.623138	0.205416	Not significant	YES
FKTN	0.112	0.623138	0.205416	Not significant	YES
FLJ35220	0.106	0.623138	0.205416	Not significant	NO
FMO5	0.085	0.623138	0.205416	Not significant	NO
FXR1	-0.153	0.623138	0.205416	Not significant	YES
GALNT2	0.112	0.623138	0.205416	Not significant	NO
GGCT	0.125	0.623138	0.205416	Not significant	NO
GPR44	-0.084	0.623138	0.205416	Not significant	NO
IFFO1	-0.129	0.623138	0.205416	Not significant	NO
ING4	-0.133	0.623138	0.205416	Not significant	NO
ITGA5	-0.115	0.623138	0.205416	Not significant	YES
LOC100128640	0.105	0.623138	0.205416	Not significant	NO
LOC285456	-0.083	0.623138	0.205416	Not significant	NO
LOC84740	-0.076	0.623138	0.205416	Not significant	NO
LUZP6	0.138	0.623138	0.205416	Not significant	NO
MCART2	0.111	0.623138	0.205416	Not significant	NO
MYLIP	-0.091	0.623138	0.205416	Not significant	NO
NCRNA00202	0.087	0.623138	0.205416	Not significant	NO
PTGER2	-0.091	0.623138	0.205416	Not significant	NO
RABIF	0.131	0.623138	0.205416	Not significant	NO
RASAL1	-0.079	0.623138	0.205416	Not significant	NO
RGS10	-0.089	0.623138	0.205416	Not significant	NO
SF3A3	-0.155	0.623138	0.205416	Not significant	NO
SIPA1	-0.1	0.623138	0.205416	Not significant	NO
SNPH	-0.094	0.623138	0.205416	Not significant	NO
TBC1D26	-0.078	0.623138	0.205416	Not significant	NO
ZNF764	-0.155	0.623138	0.205416	Not significant	NO
ZP1	-0.079	0.623138	0.205416	Not significant	NO
LOC400657	-0.153	0.624294	0.204611	Not significant	NO
PNMA2	-0.083	0.624294	0.204611	Not significant	NO
SMU1	0.17	0.624294	0.204611	Not significant	NO
AGBL3	0.093	0.624395	0.204541	Not significant	NO
C16orf86	-0.091	0.624395	0.204541	Not significant	NO
C19orf77	-0.08	0.624395	0.204541	Not significant	NO
NAP1L4	-0.138	0.624395	0.204541	Not significant	NO
ST3GAL3	-0.112	0.624395	0.204541	Not significant	YES
HES5	-0.069	0.62467	0.204349	Not significant	NO
SPATA24	-0.099	0.62467	0.204349	Not significant	NO
BCAT1	-0.088	0.625187	0.20399	Not significant	NO
C6orf134	-0.133	0.625187	0.20399	Not significant	NO
GPC3	-0.086	0.625187	0.20399	Not significant	NO
MLLT4	0.092	0.625187	0.20399	Not significant	NO
PCIF1	-0.15	0.625187	0.20399	Not significant	NO
PEBP4	-0.075	0.625187	0.20399	Not significant	NO
SFXN2	-0.107	0.625187	0.20399	Not significant	YES
TANC2	0.105	0.625187	0.20399	Not significant	YES
ABHD12B	-0.077	0.625219	0.203968	Not significant	NO
ATP2A3	-0.086	0.625219	0.203968	Not significant	NO
BAT2	-0.144	0.625219	0.203968	Not significant	NO
C22orf15	-0.084	0.625219	0.203968	Not significant	NO
CBFA2T2	0.133	0.625219	0.203968	Not significant	YES
CBX2	-0.087	0.625219	0.203968	Not significant	NO
CCDC102B	-0.111	0.625219	0.203968	Not significant	NO
CD7	-0.084	0.625219	0.203968	Not significant	NO
CXCR2	-0.083	0.625219	0.203968	Not significant	NO
DDX47	-0.164	0.625219	0.203968	Not significant	NO
DNAJA4	0.1	0.625219	0.203968	Not significant	NO
FBRS	-0.137	0.625219	0.203968	Not significant	NO
GNMT	-0.086	0.625219	0.203968	Not significant	NO
GPR132	0.091	0.625219	0.203968	Not significant	NO
LDB2	0.089	0.625219	0.203968	Not significant	NO
LOC286367	-0.101	0.625219	0.203968	Not significant	NO
MEA1	-0.117	0.625219	0.203968	Not significant	NO
MORN2	-0.115	0.625219	0.203968	Not significant	NO
MT1X	-0.081	0.625219	0.203968	Not significant	NO
PIPSL	0.139	0.625219	0.203968	Not significant	NO
PMS1	0.145	0.625219	0.203968	Not significant	NO
PTCH2	0.087	0.625219	0.203968	Not significant	NO
RBM19	-0.144	0.625219	0.203968	Not significant	NO
RGPD5	-0.084	0.625219	0.203968	Not significant	NO
SCPEP1	-0.081	0.625219	0.203968	Not significant	NO
SLC1A4	-0.096	0.625219	0.203968	Not significant	YES
SLC5A3	-0.091	0.625219	0.203968	Not significant	NO
SLC9A5	0.094	0.625219	0.203968	Not significant	NO
SORT1	-0.092	0.625219	0.203968	Not significant	NO
SPAG16	-0.141	0.625219	0.203968	Not significant	NO
STARD4	-0.09	0.625219	0.203968	Not significant	NO
TBC1D2	0.095	0.625219	0.203968	Not significant	NO
TIAM1	-0.091	0.625219	0.203968	Not significant	NO
TMEM45B	-0.078	0.625219	0.203968	Not significant	YES
TOMM34	-0.108	0.625219	0.203968	Not significant	NO
TSN	0.164	0.625219	0.203968	Not significant	NO
TSPAN12	-0.082	0.625219	0.203968	Not significant	NO
TWSG1	-0.099	0.625219	0.203968	Not significant	NO
ZNF24	-0.151	0.625219	0.203968	Not significant	YES
ZNF511	-0.11	0.625219	0.203968	Not significant	NO
ZNF883	-0.085	0.625219	0.203968	Not significant	NO
DPCD	-0.095	0.625268	0.203934	Not significant	NO
ADAM22	-0.082	0.625773	0.203583	Not significant	NO
TPRG1	-0.093	0.626211	0.20328	Not significant	NO
MGC42105	-0.08	0.626223	0.203271	Not significant	NO
MTERF	0.126	0.627384	0.202467	Not significant	NO
NR1D2	-0.093	0.627384	0.202467	Not significant	YES
SAA2	-0.079	0.627384	0.202467	Not significant	NO
BNC2	0.084	0.627848	0.202146	Not significant	NO
PITPNM3	0.082	0.627848	0.202146	Not significant	NO
C15orf34	0.102	0.628402	0.201762	Not significant	NO
CNN3	0.1	0.628402	0.201762	Not significant	NO
ADAP1	-0.084	0.628573	0.201644	Not significant	NO
CCT8	-0.141	0.628573	0.201644	Not significant	NO
CYB561D2	-0.102	0.628573	0.201644	Not significant	NO
FAM81A	0.083	0.628573	0.201644	Not significant	NO
FOXI2	-0.072	0.628573	0.201644	Not significant	YES
MAL	-0.079	0.628573	0.201644	Not significant	NO
NAV2	-0.083	0.628573	0.201644	Not significant	YES
NDUFC2	-0.126	0.628573	0.201644	Not significant	NO
RNF121	-0.128	0.628573	0.201644	Not significant	NO
SERHL	-0.115	0.628573	0.201644	Not significant	NO
TAF11	-0.121	0.628573	0.201644	Not significant	NO
TMEM126B	-0.139	0.628573	0.201644	Not significant	NO
NNT	0.12	0.629039	0.201322	Not significant	NO
PMS2L11	0.105	0.629039	0.201322	Not significant	NO
SLC5A6	0.119	0.629039	0.201322	Not significant	NO
VIM	-0.099	0.629039	0.201322	Not significant	NO
NAP1L2	-0.08	0.629066	0.201304	Not significant	NO
ANKRD56	-0.076	0.629094	0.201285	Not significant	NO
CACNA1G	0.076	0.629094	0.201285	Not significant	NO
CCIN	-0.075	0.629094	0.201285	Not significant	NO
E2F5	-0.097	0.629094	0.201285	Not significant	NO
IMPDH1	0.115	0.629094	0.201285	Not significant	NO
KCTD3	0.099	0.629094	0.201285	Not significant	NO
PPEF1	0.084	0.629094	0.201285	Not significant	NO
REC8	-0.085	0.629094	0.201285	Not significant	NO
APITD1	-0.133	0.630157	0.200551	Not significant	NO
C7orf25	0.118	0.630157	0.200551	Not significant	NO
CCDC28A	-0.127	0.630157	0.200551	Not significant	NO
CTDP1	-0.124	0.630157	0.200551	Not significant	NO
FXYD6	-0.082	0.630157	0.200551	Not significant	NO
G3BP1	0.13	0.630157	0.200551	Not significant	NO
LOC100101266	-0.087	0.630157	0.200551	Not significant	NO
OGDH	0.127	0.630157	0.200551	Not significant	NO
PAIP2B	-0.097	0.630157	0.200551	Not significant	NO
PDHA1	0.113	0.630157	0.200551	Not significant	NO
TEPP	-0.073	0.630157	0.200551	Not significant	NO
TMEM217	-0.089	0.630157	0.200551	Not significant	NO
TMEM92	-0.073	0.630157	0.200551	Not significant	YES
NUPL2	0.123	0.630276	0.200469	Not significant	NO
BTG3	-0.127	0.631277	0.19978	Not significant	NO
IGSF22	-0.085	0.631277	0.19978	Not significant	YES
MGST3	0.092	0.631277	0.19978	Not significant	NO
MINA	0.12	0.631277	0.19978	Not significant	NO
PCNXL2	0.09	0.631277	0.19978	Not significant	NO
CCDC59	-0.139	0.631351	0.199729	Not significant	NO
CPNE7	-0.082	0.631351	0.199729	Not significant	NO
SEC13	-0.137	0.631351	0.199729	Not significant	NO
TMBIM4	-0.151	0.631351	0.199729	Not significant	NO
FBLN5	-0.087	0.632824	0.198717	Not significant	NO
HIBCH	0.126	0.632824	0.198717	Not significant	NO
MLC1	-0.084	0.632824	0.198717	Not significant	NO
PSMC2	0.138	0.632824	0.198717	Not significant	YES
TACC1	-0.1	0.632824	0.198717	Not significant	NO
UBAC2	-0.128	0.632824	0.198717	Not significant	NO
ADRA2C	-0.076	0.63287	0.198685	Not significant	NO
DHRS7	-0.107	0.63287	0.198685	Not significant	NO
ACAD9	-0.145	0.633112	0.19852	Not significant	NO
ADAMTS10	-0.089	0.633112	0.19852	Not significant	NO
C10orf79	-0.078	0.633112	0.19852	Not significant	NO
C12orf10	-0.11	0.633112	0.19852	Not significant	NO
C13orf37	-0.109	0.633112	0.19852	Not significant	NO
DCDC2	-0.077	0.633112	0.19852	Not significant	NO
DCP1B	-0.158	0.633112	0.19852	Not significant	NO
FASN	0.099	0.633112	0.19852	Not significant	NO
FYCO1	-0.091	0.633112	0.19852	Not significant	NO
GPSM3	-0.089	0.633112	0.19852	Not significant	NO
GYS2	-0.075	0.633112	0.19852	Not significant	NO
LOC284023	0.117	0.633112	0.19852	Not significant	NO
LSM6	-0.12	0.633112	0.19852	Not significant	NO
ME1	0.093	0.633112	0.19852	Not significant	NO
MGC87042	-0.088	0.633112	0.19852	Not significant	NO
NFYC	-0.167	0.633112	0.19852	Not significant	NO
NUCB2	-0.084	0.633112	0.19852	Not significant	NO
PEBP1	-0.137	0.633112	0.19852	Not significant	NO
RIMKLB	-0.107	0.633112	0.19852	Not significant	NO
RRN3P1	-0.094	0.633112	0.19852	Not significant	NO
ST3GAL5	-0.1	0.633112	0.19852	Not significant	YES
TFAP2C	-0.077	0.633112	0.19852	Not significant	NO
TFDP2	-0.082	0.633112	0.19852	Not significant	NO
TMPRSS13	-0.076	0.633112	0.19852	Not significant	NO
VCAN	-0.078	0.633112	0.19852	Not significant	NO
ZNRF1	-0.091	0.633112	0.19852	Not significant	NO
SEMA4F	0.097	0.633286	0.1984	Not significant	NO
TXNDC6	-0.085	0.633286	0.1984	Not significant	NO
GNAL	-0.079	0.633481	0.198267	Not significant	NO
RNF216	0.16	0.633481	0.198266	Not significant	NO
SOX4	-0.092	0.633481	0.198266	Not significant	YES
ZNF565	0.123	0.633481	0.198266	Not significant	NO
CDK14	-0.084	0.633622	0.19817	Not significant	NO
FAM185A	0.124	0.633622	0.19817	Not significant	NO
FOXD4L1	0.09	0.633622	0.19817	Not significant	NO
PDE7B	-0.087	0.633622	0.19817	Not significant	NO
SDCCAG8	0.152	0.633622	0.19817	Not significant	NO
TMIGD2	-0.077	0.633622	0.19817	Not significant	NO
AKR1C3	-0.082	0.634572	0.197519	Not significant	NO
ALOX5	-0.085	0.634572	0.197519	Not significant	NO
C11orf54	-0.144	0.634572	0.197519	Not significant	NO
CC2D1B	-0.159	0.634572	0.197519	Not significant	NO
HN1	-0.087	0.634572	0.197519	Not significant	NO
HSD17B3	0.08	0.634572	0.197519	Not significant	NO
LIN7A	-0.071	0.634572	0.197519	Not significant	YES
MDC1	-0.141	0.634572	0.197519	Not significant	NO
RHOU	-0.085	0.634572	0.197519	Not significant	NO
SF1	-0.162	0.634572	0.197519	Not significant	NO
C10orf47	-0.081	0.635061	0.197185	Not significant	NO
TMEM26	-0.08	0.635061	0.197185	Not significant	NO
DHX38	-0.154	0.6369	0.195929	Not significant	NO
FAT4	-0.077	0.6369	0.195929	Not significant	NO
NRXN2	-0.079	0.6369	0.195929	Not significant	NO
SV2B	0.076	0.6369	0.195929	Not significant	NO
ZNF805	0.15	0.6369	0.195929	Not significant	NO
C4orf38	-0.073	0.638402	0.194905	Not significant	NO
CEP70	-0.087	0.638551	0.194804	Not significant	NO
C2orf69	0.131	0.638919	0.194554	Not significant	YES
GPR173	-0.08	0.638919	0.194554	Not significant	NO
KAT5	-0.139	0.638919	0.194554	Not significant	NO
PPP2R1B	-0.135	0.638919	0.194554	Not significant	NO
RAMP1	-0.074	0.638919	0.194554	Not significant	NO
THSD1P1	-0.136	0.638919	0.194554	Not significant	NO
GAS2L1	0.082	0.639735	0.194	Not significant	NO
SYTL2	0.091	0.639762	0.193982	Not significant	YES
CAPN10	-0.116	0.640211	0.193677	Not significant	NO
MN1	-0.075	0.640211	0.193677	Not significant	NO
CFB	-0.08	0.641262	0.192965	Not significant	NO
DLD	0.118	0.641421	0.192857	Not significant	NO
GJD3	-0.077	0.641421	0.192857	Not significant	NO
TMEM44	-0.094	0.641421	0.192857	Not significant	NO
KIFC3	-0.082	0.641492	0.192809	Not significant	NO
FN3K	0.088	0.641653	0.1927	Not significant	NO
GSTO1	-0.096	0.641653	0.1927	Not significant	NO
MEG3	0.073	0.641732	0.192647	Not significant	NO
SEPX1	-0.106	0.641732	0.192647	Not significant	NO
PPP4C	-0.095	0.642011	0.192457	Not significant	NO
GIYD2	-0.087	0.642222	0.192315	Not significant	NO
LRRC4C	-0.071	0.642222	0.192315	Not significant	NO
SFRP2	-0.064	0.642222	0.192315	Not significant	NO
SPDYE6	0.103	0.642234	0.192307	Not significant	NO
C16orf75	-0.081	0.642858	0.191885	Not significant	NO
C7orf10	0.081	0.642858	0.191885	Not significant	NO
GMFG	-0.079	0.642858	0.191885	Not significant	NO
KRT2	-0.077	0.642858	0.191885	Not significant	NO
LOC113230	0.084	0.642858	0.191885	Not significant	NO
MIOS	0.143	0.642858	0.191885	Not significant	NO
MTF2	-0.097	0.642858	0.191885	Not significant	NO
NGFR	-0.075	0.642858	0.191885	Not significant	NO
RUSC2	0.089	0.642858	0.191885	Not significant	NO
SEC24C	-0.168	0.642858	0.191885	Not significant	NO
SMAD6	-0.082	0.642858	0.191885	Not significant	NO
TMEM100	0.076	0.642858	0.191885	Not significant	NO
AGRN	-0.081	0.642859	0.191884	Not significant	NO
MTMR2	-0.144	0.642859	0.191884	Not significant	YES
MYBL2	-0.079	0.642859	0.191884	Not significant	NO
PHF13	-0.128	0.642859	0.191884	Not significant	YES
RPS6KB2	-0.101	0.642859	0.191884	Not significant	NO
SPOCD1	-0.077	0.642859	0.191884	Not significant	NO
TSGA10	0.088	0.642859	0.191884	Not significant	NO
C1QTNF6	0.089	0.642923	0.191841	Not significant	NO
SERTAD4	-0.072	0.642923	0.191841	Not significant	NO
SPSB1	-0.095	0.643094	0.191725	Not significant	NO
CBS	0.08	0.643209	0.191648	Not significant	NO
EXOSC6	-0.124	0.643209	0.191648	Not significant	NO
GUCY1A3	-0.092	0.643209	0.191648	Not significant	NO
MED4	-0.14	0.643209	0.191648	Not significant	NO
ZNF235	0.115	0.643209	0.191648	Not significant	NO
AIP	-0.093	0.643342	0.191558	Not significant	NO
CAPN11	-0.078	0.643541	0.191424	Not significant	NO
B3GALTL	0.1	0.644555	0.19074	Not significant	NO
GRAP	-0.081	0.644555	0.19074	Not significant	NO
TATDN3	0.126	0.644555	0.19074	Not significant	NO
ANKRD35	-0.077	0.645095	0.190376	Not significant	NO
AKAP9	0.095	0.645526	0.190086	Not significant	NO
DBNDD2	-0.091	0.645526	0.190086	Not significant	NO
MYL12B	-0.128	0.645526	0.190086	Not significant	NO
XRRA1	-0.111	0.645583	0.190048	Not significant	NO
AARS	-0.145	0.645762	0.189928	Not significant	NO
C6orf124	0.079	0.645762	0.189928	Not significant	NO
CRAT	-0.098	0.645762	0.189928	Not significant	NO
CREB3L3	-0.072	0.645762	0.189928	Not significant	NO
DDO	-0.079	0.645762	0.189928	Not significant	NO
DDX60L	-0.103	0.645762	0.189928	Not significant	NO
EXOSC8	-0.102	0.645762	0.189928	Not significant	NO
FAM84B	-0.083	0.645762	0.189928	Not significant	NO
FGD6	-0.08	0.645762	0.189928	Not significant	YES
GTSF1	-0.076	0.645762	0.189928	Not significant	NO
GYPE	-0.079	0.645762	0.189928	Not significant	NO
MYOM3	-0.074	0.645762	0.189928	Not significant	NO
PBX4	-0.085	0.645762	0.189928	Not significant	NO
POLR2J4	0.134	0.645762	0.189928	Not significant	NO
PTK6	0.077	0.645762	0.189928	Not significant	NO
PXN	-0.105	0.645762	0.189928	Not significant	YES
RG9MTD3	0.155	0.645762	0.189928	Not significant	NO
RGPD1	0.084	0.645762	0.189928	Not significant	NO
SAP18	-0.137	0.645762	0.189928	Not significant	NO
ACTR1A	-0.12	0.64719	0.188968	Not significant	NO
ADIPOR1	0.108	0.64719	0.188968	Not significant	NO
ARL3	-0.103	0.64719	0.188968	Not significant	NO
ARSG	-0.099	0.64719	0.188968	Not significant	NO
B3GALT4	-0.097	0.64719	0.188968	Not significant	NO
BMF	-0.079	0.64719	0.188968	Not significant	YES
C12orf73	-0.101	0.64719	0.188968	Not significant	NO
C14orf37	-0.078	0.64719	0.188968	Not significant	NO
CACNA1F	-0.073	0.64719	0.188968	Not significant	NO
CD207	-0.069	0.64719	0.188968	Not significant	NO
CD3EAP	0.111	0.64719	0.188968	Not significant	NO
CD99	-0.079	0.64719	0.188968	Not significant	YES
CDKN1C	-0.079	0.64719	0.188968	Not significant	NO
CKM	-0.069	0.64719	0.188968	Not significant	NO
CNNM4	0.09	0.64719	0.188968	Not significant	NO
COX4I1	-0.089	0.64719	0.188968	Not significant	NO
CTNNAL1	-0.089	0.64719	0.188968	Not significant	NO
EBF3	-0.073	0.64719	0.188968	Not significant	NO
EFNB3	-0.072	0.64719	0.188968	Not significant	NO
GINS3	0.096	0.64719	0.188968	Not significant	NO
GUCY2D	-0.068	0.64719	0.188968	Not significant	NO
HYAL1	0.082	0.64719	0.188968	Not significant	NO
IFNGR2	-0.1	0.64719	0.188968	Not significant	NO
INTU	-0.075	0.64719	0.188968	Not significant	NO
KCND1	0.098	0.64719	0.188968	Not significant	NO
LEAP2	0.09	0.64719	0.188968	Not significant	NO
LOC283392	-0.07	0.64719	0.188968	Not significant	NO
LOC643719	-0.079	0.64719	0.188968	Not significant	NO
LOC649330	0.107	0.64719	0.188968	Not significant	NO
LOC653113	-0.087	0.64719	0.188968	Not significant	NO
LOC728743	-0.085	0.64719	0.188968	Not significant	NO
LRCH2	-0.072	0.64719	0.188968	Not significant	YES
LRRC57	0.127	0.64719	0.188968	Not significant	NO
METTL12	-0.111	0.64719	0.188968	Not significant	NO
MYL6	-0.093	0.64719	0.188968	Not significant	NO
NAP1L1	-0.112	0.64719	0.188968	Not significant	NO
NSMAF	0.117	0.64719	0.188968	Not significant	NO
PADI4	-0.074	0.64719	0.188968	Not significant	NO
PARN	-0.162	0.64719	0.188968	Not significant	NO
PEX5	-0.107	0.64719	0.188968	Not significant	NO
PFKFB1	0.08	0.64719	0.188968	Not significant	NO
PLCL2	-0.113	0.64719	0.188968	Not significant	NO
POLR3K	-0.108	0.64719	0.188968	Not significant	NO
PRRT1	0.089	0.64719	0.188968	Not significant	NO
RBM41	0.102	0.64719	0.188968	Not significant	NO
RBPMS	-0.085	0.64719	0.188968	Not significant	NO
RIMS3	-0.082	0.64719	0.188968	Not significant	NO
RPTOR	0.111	0.64719	0.188968	Not significant	NO
SPCS1	-0.144	0.64719	0.188968	Not significant	NO
SPHK1	-0.076	0.64719	0.188968	Not significant	NO
THEM5	0.079	0.64719	0.188968	Not significant	NO
TMEM194B	-0.106	0.64719	0.188968	Not significant	NO
TSPAN9	-0.082	0.64719	0.188968	Not significant	NO
UROD	-0.111	0.64719	0.188968	Not significant	NO
USP44	-0.076	0.64719	0.188968	Not significant	YES
WDR7	-0.137	0.64719	0.188968	Not significant	YES
ZCCHC17	-0.146	0.64719	0.188968	Not significant	NO
ZNF439	-0.085	0.64719	0.188968	Not significant	NO
MOXD1	-0.074	0.647581	0.188706	Not significant	NO
NOL7	-0.133	0.647581	0.188706	Not significant	NO
ORMDL3	-0.127	0.647581	0.188706	Not significant	NO
DTX1	-0.075	0.648563	0.188048	Not significant	NO
GRAMD4	0.101	0.649635	0.187331	Not significant	NO
SLC25A35	0.108	0.649853	0.187185	Not significant	YES
CNPY3	-0.084	0.650127	0.187001	Not significant	NO
DYDC2	-0.064	0.650127	0.187001	Not significant	NO
OPRK1	0.074	0.650127	0.187001	Not significant	YES
PTPN20B	-0.071	0.650127	0.187001	Not significant	NO
TICAM2	0.117	0.650127	0.187001	Not significant	NO
VWA5A	-0.094	0.650127	0.187001	Not significant	NO
ZFP1	-0.107	0.650127	0.187001	Not significant	NO
IQGAP3	0.083	0.650965	0.186443	Not significant	NO
METTL2B	0.116	0.651209	0.186279	Not significant	NO
ALDH9A1	0.093	0.651361	0.186178	Not significant	YES
ARIH2	-0.16	0.651361	0.186178	Not significant	NO
[truncated: 13,171 more rows]

## Sheet: n.84C>T_MIR365B_DE_genes
gene_ID	log2(FC)	adj_p-value	-log10(adj_p-value)	change_direction	predicted_target_mir-365b-5p
TYRP1	-20.909	8.65269e-06	5.06285	Down	YES
RAB17	-8.523	0.000571677	3.24285	Down	YES
DCT	-10.344	0.00233854	2.63105	Down	YES
SLC25A4	-3.506	0.0146108	1.83532	Down	YES
VGF	-7.728	0.0185643	1.73132	Down	YES
RRAGD	-2.287	0.0358828	1.44511	Down	YES
PHLDA3	-2.347	0.0483054	1.316	Down	YES
MLPH	-8.617	1.00025e-05	4.99989	Down	NO
SILV	-12.151	1.9494e-05	4.7101	Down	NO
TYR	-10.606	1.9494e-05	4.7101	Down	NO
MLANA	-10.815	2.37149e-05	4.62498	Down	NO
CLCA2	-18.604	2.89368e-05	4.53855	Down	NO
GJB1	-8.556	0.000280634	3.55186	Down	NO
S100A1	-8.286	0.000447995	3.34873	Down	NO
SLC24A5	-8.475	0.000571677	3.24285	Down	NO
PAEP	-16.63	0.000716452	3.14481	Down	NO
GPR143	-10.233	0.00167561	2.77583	Down	NO
CC2D2A	-3.351	0.00206801	2.68445	Down	NO
GYG2	-6.749	0.00206801	2.68445	Down	NO
GDF15	-8.051	0.0030575	2.51463	Down	NO
BIRC7	-9.288	0.00446155	2.35051	Down	NO
ESRP1	-9.612	0.00446155	2.35051	Down	NO
C10orf90	-7.622	0.00764019	2.1169	Down	NO
STK32A	-8.954	0.00764019	2.1169	Down	NO
PNMAL1	-5.708	0.00840748	2.07533	Down	NO
SLC45A2	-7.632	0.00840748	2.07533	Down	NO
CELSR2	-4.017	0.0146108	1.83532	Down	NO
PIR	-4.924	0.0146108	1.83532	Down	NO
IGSF11	-4.821	0.015372	1.81327	Down	NO
ALX1	-4.431	0.0172117	1.76418	Down	NO
KLF15	-4.158	0.0172117	1.76418	Down	NO
TRPM1	-7.688	0.0194551	1.71097	Down	NO
APOD	-6.164	0.0198063	1.7032	Down	NO
D4S234E	-5.371	0.0238383	1.62272	Down	NO
ABCB5	-6.675	0.0267678	1.57239	Down	NO
MORN4	-2.223	0.0267678	1.57239	Down	NO
RXRG	-6.289	0.0267678	1.57239	Down	NO
LOC100127888	-6.35	0.0273463	1.5631	Down	NO
TMEM98	-3.432	0.0273463	1.5631	Down	NO
SORT1	-2.22	0.0336176	1.47343	Down	NO
MITF	-2.987	0.0341195	1.467	Down	NO
RAGE	-2.731	0.0341195	1.467	Down	NO
GAPDHS	-5.41	0.0358828	1.44511	Down	NO
FAM189A2	-3.823	0.0368551	1.4335	Down	NO
BAIAP2L2	-4.338	0.0381018	1.41905	Down	NO
AIF1L	-3.085	0.0426105	1.37048	Down	NO
B9D1	-1.866	0.0426105	1.37048	Down	NO
ROPN1	-3.659	0.0448019	1.3487	Down	NO
CAPN3	-3.263	0.0479265	1.31942	Down	NO
PRPF40B	-1.41	0.0483054	1.316	Down	NO
BCAN	-4.242	0.0520653	1.28345	Not significant	NO
GREB1	-2.606	0.0532453	1.27372	Not significant	NO
MYEF2	-1.795	0.0555764	1.25511	Not significant	NO
QPCT	-3.156	0.0555764	1.25511	Not significant	NO
SLC16A4	-1.63	0.0635577	1.19683	Not significant	NO
RAB38	-2.415	0.0644538	1.19075	Not significant	NO
C6orf176	-3.151	0.0765509	1.11605	Not significant	NO
SPRYD5	-3.228	0.0796571	1.09878	Not significant	NO
LGI3	-3.187	0.0800673	1.09654	Not significant	NO
LDB3	-2.961	0.0829088	1.0814	Not significant	NO
GMPR	-2.426	0.0881892	1.05458	Not significant	YES
NAT8L	-1.97	0.0881892	1.05458	Not significant	NO
BAMBI	-1.615	0.0884582	1.05326	Not significant	YES
C1orf190	-1.593	0.101932	0.991689	Not significant	NO
CPN1	-2.632	0.101932	0.991689	Not significant	NO
C1orf85	-1.145	0.103668	0.984355	Not significant	NO
GJB2	-2.566	0.103668	0.984355	Not significant	NO
GPRC5A	-2.211	0.107365	0.969137	Not significant	NO
LRP2	-2.368	0.109466	0.96072	Not significant	NO
KCNJ13	-2.349	0.110905	0.955048	Not significant	NO
LRRN4CL	-1.925	0.110905	0.955048	Not significant	YES
PLEKHH1	-1.261	0.110905	0.955048	Not significant	YES
ST3GAL5	-0.718	0.111471	0.95284	Not significant	NO
IGSF3	-1.089	0.115043	0.939139	Not significant	NO
C21orf56	-1.221	0.116703	0.932916	Not significant	NO
CA12	-2.068	0.117144	0.931281	Not significant	YES
KCNK2	-1.992	0.117144	0.931281	Not significant	NO
C5orf32	-0.615	0.120811	0.917893	Not significant	NO
BCHE	-1.672	0.121178	0.916576	Not significant	NO
CNIH3	-1.568	0.126176	0.899022	Not significant	NO
IRX6	-1.813	0.126176	0.899022	Not significant	NO
CTXN1	-1.391	0.130705	0.883707	Not significant	NO
MCOLN3	-1.732	0.130705	0.883707	Not significant	NO
C14orf34	-1.877	0.131946	0.879605	Not significant	NO
NIT2	-0.27	0.131946	0.879605	Not significant	YES
NRSN2	-0.472	0.132355	0.878259	Not significant	NO
QPRT	-0.875	0.132355	0.878259	Not significant	YES
LINGO1	-1.194	0.142687	0.845614	Not significant	NO
SEZ6L2	-1.295	0.142687	0.845614	Not significant	NO
TRIM63	-1.438	0.1467	0.833569	Not significant	NO
RNF43	-1.16	0.15035	0.822897	Not significant	YES
SLC13A3	-1.383	0.163117	0.787502	Not significant	NO
TSPAN10	-1.33	0.163117	0.787502	Not significant	NO
ALDH3B2	-1.441	0.167054	0.777143	Not significant	YES
C10orf110	-0.82	0.168588	0.773173	Not significant	NO
FN3K	-0.712	0.168588	0.773173	Not significant	NO
PFKM	-0.272	0.171532	0.765655	Not significant	NO
SCD	-0.582	0.171532	0.765655	Not significant	NO
ATP1A1	-0.339	0.173024	0.761894	Not significant	NO
CA14	-1.127	0.173024	0.761894	Not significant	NO
CCDC142	0.16	0.173024	0.761894	Not significant	YES
FAM69B	-0.711	0.173024	0.761894	Not significant	NO
FBXO16	-0.772	0.173024	0.761894	Not significant	NO
LAMC3	-1.068	0.173024	0.761894	Not significant	YES
MAGEA6	-1.302	0.173024	0.761894	Not significant	NO
METTL7B	-1.099	0.173024	0.761894	Not significant	NO
SERPINE2	-0.769	0.173024	0.761894	Not significant	NO
SHC4	-0.864	0.173024	0.761894	Not significant	NO
SPTBN2	-0.984	0.173024	0.761894	Not significant	YES
TPPP	-1.006	0.173024	0.761894	Not significant	NO
ZIC1	-1.334	0.173024	0.761894	Not significant	NO
MAT1A	-1.283	0.173527	0.760634	Not significant	NO
VAT1	-0.418	0.1749	0.75721	Not significant	YES
SERINC2	-0.74	0.176489	0.753282	Not significant	NO
SGCD	-0.612	0.182626	0.738437	Not significant	YES
STXBP1	-0.518	0.182626	0.738437	Not significant	NO
TUBB4	-0.86	0.182626	0.738437	Not significant	NO
AK3L1	-0.587	0.186786	0.728657	Not significant	NO
STAG3L4	-0.281	0.186786	0.728657	Not significant	NO
AMZ1	0.75	0.197293	0.704889	Not significant	YES
ELOVL2	-0.944	0.197293	0.704889	Not significant	NO
MAGEA3	-1.105	0.197293	0.704889	Not significant	NO
PPCDC	-0.173	0.197293	0.704889	Not significant	NO
RLBP1	-1.071	0.197293	0.704889	Not significant	NO
NQO1	-0.623	0.198889	0.701389	Not significant	YES
FLJ16779	-1.02	0.212856	0.671915	Not significant	NO
HSBP1L1	-0.5	0.21841	0.660727	Not significant	NO
SNCA	-0.395	0.21841	0.660727	Not significant	NO
DNAH2	-0.976	0.220746	0.656107	Not significant	NO
PTK7	-0.405	0.224557	0.648673	Not significant	NO
COL11A1	-0.936	0.226461	0.645007	Not significant	YES
SLC7A8	-0.493	0.227482	0.643054	Not significant	NO
CCL28	-0.317	0.229519	0.639181	Not significant	YES
CEACAM1	-0.642	0.235952	0.627176	Not significant	NO
ETV5	-0.197	0.2461	0.608888	Not significant	YES
FAM69C	-0.846	0.2461	0.608888	Not significant	NO
NGF	0.559	0.248969	0.603855	Not significant	NO
C6orf168	-0.433	0.256965	0.590127	Not significant	NO
DDR1	-0.286	0.256965	0.590127	Not significant	NO
PHGDH	-0.599	0.256965	0.590127	Not significant	NO
GPR158	-0.679	0.266866	0.573707	Not significant	NO
MPPED2	-0.561	0.266866	0.573707	Not significant	NO
PROM1	-0.779	0.269678	0.569155	Not significant	NO
CORO2B	-0.542	0.270149	0.568396	Not significant	YES
HK2	-0.192	0.277481	0.556766	Not significant	NO
RHCG	-0.731	0.278899	0.554553	Not significant	YES
ATP1B3	-0.111	0.279204	0.554078	Not significant	YES
DHDPSL	-0.629	0.279204	0.554078	Not significant	NO
ST3GAL6	-0.266	0.279204	0.554078	Not significant	YES
TTC39A	-0.633	0.279466	0.55367	Not significant	YES
BEST1	-0.352	0.280976	0.551331	Not significant	YES
ETV4	-0.234	0.280976	0.551331	Not significant	NO
FAM149A	-0.313	0.280976	0.551331	Not significant	NO
ABCC11	-0.695	0.284802	0.545457	Not significant	NO
GJA3	-0.523	0.284802	0.545457	Not significant	YES
MAGEA12	-0.696	0.284802	0.545457	Not significant	NO
SAT2	-0.109	0.284802	0.545457	Not significant	NO
AAK1	0.066	0.287621	0.541179	Not significant	YES
MRPS25	-0.108	0.287621	0.541179	Not significant	YES
PKD1L2	-0.665	0.287621	0.541179	Not significant	NO
TRIB3	-0.233	0.287621	0.541179	Not significant	YES
IQCG	0.199	0.291426	0.535471	Not significant	NO
HIST1H2BD	-0.31	0.292187	0.53434	Not significant	YES
MTHFS	-0.109	0.292187	0.53434	Not significant	NO
CADM4	-0.355	0.294581	0.530795	Not significant	NO
GPR37	-0.488	0.294581	0.530795	Not significant	NO
GPR56	-0.275	0.294581	0.530795	Not significant	NO
RAC3	-0.307	0.294581	0.530795	Not significant	NO
TBC1D7	-0.248	0.294581	0.530795	Not significant	NO
TFG	-0.043	0.294581	0.530795	Not significant	NO
BFSP1	-0.331	0.295588	0.529314	Not significant	NO
HSPA1B	-0.229	0.301136	0.521237	Not significant	NO
MT1G	-0.564	0.302466	0.519324	Not significant	NO
FAH	-0.173	0.30594	0.514364	Not significant	NO
CD59	-0.145	0.30896	0.510098	Not significant	YES
MTUS1	-0.192	0.30896	0.510098	Not significant	NO
NOL3	-0.154	0.30896	0.510098	Not significant	YES
MGST1	-0.539	0.312224	0.505533	Not significant	NO
NUPR1	-0.268	0.312224	0.505533	Not significant	NO
PRAME	-0.255	0.312224	0.505533	Not significant	NO
C6orf218	-0.372	0.313204	0.504173	Not significant	NO
CD63	-0.123	0.313204	0.504173	Not significant	NO
NEDD4L	-0.193	0.313204	0.504173	Not significant	NO
SLC44A3	-0.293	0.313204	0.504173	Not significant	NO
TSPAN3	-0.09	0.313204	0.504173	Not significant	YES
HOMER2	-0.37	0.313936	0.503159	Not significant	YES
OSCP1	-0.112	0.315483	0.501024	Not significant	NO
MEGF10	-0.521	0.317841	0.497791	Not significant	NO
NKAIN4	-0.508	0.317841	0.497791	Not significant	YES
C3orf75	-0.045	0.325165	0.487897	Not significant	NO
KCNN2	-0.448	0.325283	0.487739	Not significant	NO
EARS2	-0.052	0.328552	0.483396	Not significant	NO
CABLES1	-0.241	0.331033	0.480128	Not significant	NO
PCCB	-0.045	0.340297	0.468142	Not significant	NO
MDGA2	-0.439	0.34572	0.461275	Not significant	NO
NHSL1	-0.131	0.34572	0.461275	Not significant	NO
RPS28	-0.362	0.360165	0.443499	Not significant	NO
AIFM2	-0.117	0.362341	0.440883	Not significant	NO
MESDC2	-0.041	0.362341	0.440883	Not significant	NO
MGC16025	-0.36	0.362341	0.440883	Not significant	NO
ATPAF1	-0.047	0.368033	0.434113	Not significant	NO
MYH10	-0.154	0.368033	0.434113	Not significant	NO
EGF	-0.454	0.369911	0.431903	Not significant	NO
HSF4	-0.175	0.373031	0.428255	Not significant	NO
PSMG4	-0.075	0.37346	0.427756	Not significant	YES
PCDH7	-0.243	0.374649	0.426375	Not significant	NO
FEZ2	0.044	0.377772	0.422771	Not significant	NO
ABCB6	-0.098	0.38223	0.417675	Not significant	NO
GCNT2	-0.186	0.38223	0.417675	Not significant	YES
EFNA1	-0.132	0.392544	0.406111	Not significant	NO
NTNG2	0.234	0.392544	0.406111	Not significant	NO
CYP27A1	-0.123	0.399988	0.397953	Not significant	NO
ACOT7	-0.101	0.400509	0.397388	Not significant	NO
AOC2	0.155	0.400509	0.397388	Not significant	NO
SLC7A5	-0.178	0.400509	0.397388	Not significant	NO
TMEM120A	-0.083	0.409394	0.387858	Not significant	NO
C8orf51	-0.124	0.409807	0.38742	Not significant	NO
TOM1L1	-0.107	0.411792	0.385323	Not significant	NO
C8orf75	-0.401	0.413038	0.38401	Not significant	NO
ITIH5L	-0.378	0.413038	0.38401	Not significant	NO
SDCBP	-0.117	0.413038	0.38401	Not significant	NO
CCNO	-0.293	0.417882	0.378946	Not significant	YES
CX3CL1	-0.124	0.417882	0.378946	Not significant	NO
PRSS33	-0.398	0.417882	0.378946	Not significant	YES
USP54	-0.075	0.41831	0.378502	Not significant	YES
HIST2H2BE	-0.151	0.421867	0.374824	Not significant	NO
HRK	-0.362	0.423687	0.372955	Not significant	YES
AGRN	-0.094	0.433112	0.363399	Not significant	NO
CPS1	-0.214	0.433112	0.363399	Not significant	NO
FDFT1	-0.066	0.433112	0.363399	Not significant	NO
GRASP	-0.096	0.433112	0.363399	Not significant	NO
PYGB	-0.102	0.433112	0.363399	Not significant	NO
C15orf63	-0.051	0.433894	0.362616	Not significant	NO
COMMD4	-0.063	0.433894	0.362616	Not significant	NO
DCLRE1B	0.036	0.433894	0.362616	Not significant	NO
FXR2	-0.03	0.433894	0.362616	Not significant	NO
LOC100188947	-0.31	0.433894	0.362616	Not significant	NO
LOC340357	-0.353	0.433894	0.362616	Not significant	NO
OLIG1	-0.337	0.433894	0.362616	Not significant	NO
PLEKHG3	-0.109	0.433894	0.362616	Not significant	NO
TMEM84	-0.314	0.433894	0.362616	Not significant	NO
DUSP11	0.019	0.434485	0.362025	Not significant	NO
EYA1	-0.354	0.438883	0.357651	Not significant	NO
ANO4	-0.345	0.439153	0.357385	Not significant	NO
TMEM195	-0.357	0.439153	0.357385	Not significant	NO
ALDOA	-0.071	0.439885	0.356661	Not significant	YES
GALE	-0.08	0.439885	0.356661	Not significant	NO
HERC1	0.033	0.439885	0.356661	Not significant	NO
PHF23	-0.04	0.439885	0.356661	Not significant	NO
ACTR2	0.029	0.440101	0.356447	Not significant	YES
MAPK4	-0.347	0.440101	0.356447	Not significant	NO
C5orf4	-0.085	0.44286	0.353733	Not significant	NO
IL12RB2	-0.204	0.44286	0.353733	Not significant	YES
C6orf138	-0.266	0.447402	0.349302	Not significant	NO
PNMA2	-0.225	0.447542	0.349166	Not significant	NO
ACAD9	-0.024	0.452987	0.343914	Not significant	NO
TPST2	0.054	0.452987	0.343914	Not significant	NO
DSG2	-0.276	0.453183	0.343727	Not significant	NO
FAM174B	-0.138	0.453183	0.343727	Not significant	NO
ADCY2	-0.322	0.455333	0.341671	Not significant	YES
ITGA7	-0.202	0.455333	0.341671	Not significant	NO
MDK	-0.164	0.455333	0.341671	Not significant	YES
SH3TC2	-0.11	0.455333	0.341671	Not significant	YES
ACADVL	-0.043	0.459617	0.337604	Not significant	NO
PSAT1	-0.174	0.465989	0.331624	Not significant	NO
KLHDC8B	-0.073	0.466506	0.331143	Not significant	NO
HIST3H2A	-0.123	0.468771	0.32904	Not significant	YES
NME5	-0.22	0.468771	0.32904	Not significant	NO
NRG3	-0.298	0.468771	0.32904	Not significant	YES
SGK1	-0.081	0.468771	0.32904	Not significant	NO
ZNF219	-0.083	0.471168	0.326824	Not significant	NO
GPRC5B	-0.128	0.478342	0.320261	Not significant	NO
TRIM16L	-0.078	0.478342	0.320261	Not significant	NO
SRC	-0.049	0.481165	0.317706	Not significant	NO
SHMT1	-0.059	0.484795	0.314442	Not significant	YES
C2orf88	-0.136	0.486435	0.312975	Not significant	YES
LINGO2	-0.284	0.486435	0.312975	Not significant	NO
LOC646999	0.102	0.486435	0.312975	Not significant	NO
MIPEP	-0.034	0.486435	0.312975	Not significant	NO
NLGN1	-0.155	0.486435	0.312975	Not significant	NO
FLCN	-0.026	0.490555	0.309312	Not significant	NO
PCOTH	-0.125	0.490555	0.309312	Not significant	NO
SCARB1	-0.121	0.490555	0.309312	Not significant	YES
SHISA2	-0.229	0.490555	0.309312	Not significant	NO
CTTNBP2	-0.19	0.49861	0.302239	Not significant	NO
FXYD3	-0.214	0.49861	0.302239	Not significant	YES
GPNMB	-0.077	0.49861	0.302239	Not significant	NO
NT5M	-0.096	0.49861	0.302239	Not significant	NO
HSPA1A	-0.078	0.501548	0.299688	Not significant	NO
EPHB2	0.11	0.502446	0.29891	Not significant	NO
GSTM1	-0.27	0.502446	0.29891	Not significant	NO
MRPS18B	-0.027	0.502446	0.29891	Not significant	NO
MT1E	-0.168	0.502446	0.29891	Not significant	NO
RASEF	-0.27	0.503982	0.297585	Not significant	YES
BPGM	0.024	0.505005	0.296704	Not significant	NO
ACY1	-0.047	0.505367	0.296393	Not significant	NO
C12orf73	-0.027	0.505367	0.296393	Not significant	NO
CRELD1	-0.046	0.505367	0.296393	Not significant	NO
EDA2R	-0.146	0.505367	0.296393	Not significant	NO
ESPN	-0.234	0.505367	0.296393	Not significant	NO
HIST1H2BK	-0.082	0.505367	0.296393	Not significant	NO
ITGA10	-0.233	0.505367	0.296393	Not significant	NO
PPL	-0.223	0.505367	0.296393	Not significant	NO
SNCB	-0.271	0.505367	0.296393	Not significant	NO
TGFB3	0.093	0.505367	0.296393	Not significant	YES
TTC19	-0.03	0.505367	0.296393	Not significant	NO
FMNL3	0.03	0.509652	0.292727	Not significant	YES
DVL2	-0.026	0.519828	0.28414	Not significant	NO
HPN	-0.189	0.519828	0.28414	Not significant	NO
ATP8B5P	-0.04	0.522551	0.281871	Not significant	NO
CHCHD6	-0.079	0.522551	0.281871	Not significant	NO
SLC47A1	-0.14	0.522551	0.281871	Not significant	NO
CKMT1B	-0.246	0.523748	0.280878	Not significant	NO
IL17D	-0.152	0.523748	0.280878	Not significant	NO
DDRGK1	-0.036	0.524614	0.28016	Not significant	NO
ATP2A2	-0.018	0.525672	0.279285	Not significant	NO
AZGP1	-0.18	0.525672	0.279285	Not significant	NO
CDH1	-0.186	0.525672	0.279285	Not significant	YES
CRIP2	-0.06	0.525672	0.279285	Not significant	NO
F12	-0.152	0.525672	0.279285	Not significant	NO
IFI27	-0.16	0.525672	0.279285	Not significant	NO
KLHL38	-0.162	0.525672	0.279285	Not significant	YES
LASS1	-0.094	0.525672	0.279285	Not significant	NO
PSEN2	-0.068	0.525672	0.279285	Not significant	NO
RBMS2	0.026	0.525672	0.279285	Not significant	YES
SLC25A13	-0.039	0.525672	0.279285	Not significant	YES
TRPV4	-0.149	0.525672	0.279285	Not significant	NO
APOO	-0.029	0.534378	0.272152	Not significant	NO
C17orf79	-0.025	0.534378	0.272152	Not significant	NO
C18orf22	-0.025	0.534378	0.272152	Not significant	NO
C4orf19	-0.158	0.534378	0.272152	Not significant	YES
CNTNAP3	-0.158	0.534378	0.272152	Not significant	NO
EIF4A1	-0.019	0.534378	0.272152	Not significant	NO
FAM27C	-0.074	0.534378	0.272152	Not significant	NO
FST	-0.193	0.534378	0.272152	Not significant	NO
LMCD1	0.045	0.534378	0.272152	Not significant	NO
MEX3D	0.041	0.534378	0.272152	Not significant	NO
PTGR1	-0.041	0.534378	0.272152	Not significant	NO
PYGL	-0.122	0.534378	0.272152	Not significant	NO
RAB7A	-0.02	0.534378	0.272152	Not significant	NO
SEMA4G	-0.069	0.534378	0.272152	Not significant	NO
SPRYD4	-0.033	0.534378	0.272152	Not significant	NO
UQCRQ	-0.036	0.534378	0.272152	Not significant	NO
USP34	0.021	0.534378	0.272152	Not significant	YES
WISP2	-0.186	0.534378	0.272152	Not significant	NO
FBXW8	-0.02	0.541163	0.266672	Not significant	YES
LOC728554	-0.047	0.541163	0.266672	Not significant	NO
ROPN1B	-0.081	0.541494	0.266406	Not significant	NO
MCCC2	-0.015	0.541775	0.266181	Not significant	YES
PHKA1	-0.168	0.542217	0.265827	Not significant	NO
RENBP	-0.065	0.542217	0.265827	Not significant	NO
FGFBP2	-0.174	0.542936	0.265251	Not significant	NO
CEMP1	-0.039	0.543922	0.264463	Not significant	NO
CSPG5	-0.156	0.543922	0.264463	Not significant	NO
LOC441177	-0.185	0.543922	0.264463	Not significant	NO
CKAP2L	0.05	0.544093	0.264327	Not significant	YES
EIF5AL1	-0.027	0.544257	0.264196	Not significant	NO
DCDC2	-0.174	0.547546	0.26158	Not significant	NO
PEMT	-0.046	0.55151	0.258447	Not significant	NO
DAPK2	0.078	0.554487	0.256108	Not significant	NO
HIST1H2AC	-0.071	0.555859	0.255035	Not significant	NO
C5orf54	-0.039	0.557326	0.25389	Not significant	NO
HPGD	-0.171	0.557326	0.25389	Not significant	NO
LDHA	-0.03	0.557326	0.25389	Not significant	YES
QDPR	-0.075	0.557326	0.25389	Not significant	NO
TMEM14C	-0.019	0.557326	0.25389	Not significant	NO
ABCC2	-0.151	0.558323	0.253114	Not significant	NO
C15orf37	-0.036	0.562138	0.250157	Not significant	NO
PNCK	-0.154	0.562138	0.250157	Not significant	NO
NKAIN1	-0.15	0.563416	0.24917	Not significant	YES
LOC100128640	-0.083	0.563639	0.248999	Not significant	NO
MMAB	-0.024	0.566881	0.246508	Not significant	YES
GPR137B	-0.054	0.575593	0.239885	Not significant	YES
MT1A	-0.202	0.575593	0.239885	Not significant	NO
PLEKHB1	-0.107	0.575593	0.239885	Not significant	YES
XG	-0.122	0.575593	0.239885	Not significant	NO
AQP9	-0.138	0.577065	0.238776	Not significant	YES
PRDM7	-0.198	0.579777	0.236739	Not significant	NO
JAGN1	-0.019	0.581055	0.235783	Not significant	NO
PCDHB16	-0.114	0.581055	0.235783	Not significant	NO
PSMB4	-0.021	0.581055	0.235783	Not significant	NO
TRIM6	-0.081	0.581055	0.235783	Not significant	NO
VPS52	-0.018	0.581055	0.235783	Not significant	NO
EIF5A	-0.024	0.581811	0.235218	Not significant	NO
PHOSPHO1	0.063	0.581811	0.235218	Not significant	NO
VDAC1	-0.02	0.581811	0.235218	Not significant	NO
CDK2	-0.074	0.582714	0.234544	Not significant	NO
CNN3	0.04	0.582714	0.234544	Not significant	NO
CRYL1	-0.055	0.582714	0.234544	Not significant	NO
GSTM2	-0.065	0.582714	0.234544	Not significant	NO
KCNK3	-0.192	0.582714	0.234544	Not significant	YES
DDT	-0.029	0.584526	0.233196	Not significant	NO
COL2A1	-0.196	0.592677	0.227182	Not significant	NO
HIST2H2BF	-0.083	0.592677	0.227182	Not significant	NO
LOC257358	-0.077	0.592677	0.227182	Not significant	NO
TMEM11	-0.022	0.592677	0.227182	Not significant	YES
AMDHD2	-0.046	0.593359	0.226683	Not significant	NO
APCDD1	-0.139	0.593359	0.226683	Not significant	YES
APEH	-0.02	0.593359	0.226683	Not significant	YES
ATOH8	-0.084	0.593359	0.226683	Not significant	YES
CADPS	-0.138	0.593359	0.226683	Not significant	NO
COL11A2	-0.152	0.593359	0.226683	Not significant	NO
ETV1	-0.062	0.593359	0.226683	Not significant	YES
FAM167B	-0.091	0.593359	0.226683	Not significant	NO
IRAK2	0.06	0.593359	0.226683	Not significant	NO
MAN2C1	-0.018	0.593359	0.226683	Not significant	NO
MANBAL	-0.016	0.593359	0.226683	Not significant	NO
MED9	-0.02	0.593359	0.226683	Not significant	NO
NDUFAB1	-0.012	0.593359	0.226683	Not significant	NO
SLC4A11	-0.115	0.593359	0.226683	Not significant	NO
SLCO4A1	-0.096	0.593359	0.226683	Not significant	NO
SPATA20	-0.041	0.593359	0.226683	Not significant	NO
TCTN1	-0.026	0.593359	0.226683	Not significant	NO
TRPM3	-0.166	0.593359	0.226683	Not significant	YES
?|653553	-0.047	0.59711	0.223946	Not significant	NO
KIT	-0.139	0.59711	0.223946	Not significant	NO
ACSBG1	-0.132	0.597461	0.223691	Not significant	NO
FOSL2	0.047	0.6015	0.220765	Not significant	YES
PPP1R1B	-0.183	0.6015	0.220765	Not significant	NO
S100A8	-0.174	0.6015	0.220765	Not significant	NO
SIL1	-0.03	0.6015	0.220765	Not significant	NO
SPRY4	-0.071	0.6015	0.220765	Not significant	NO
C10orf47	-0.07	0.602527	0.220024	Not significant	NO
C7orf55	-0.03	0.602527	0.220024	Not significant	NO
COPZ2	-0.06	0.602527	0.220024	Not significant	NO
FAM174A	-0.02	0.602527	0.220024	Not significant	NO
LOC220594	-0.098	0.602527	0.220024	Not significant	NO
LOC654342	0.042	0.602527	0.220024	Not significant	NO
PEX13	0.012	0.602527	0.220024	Not significant	YES
TTC27	0.012	0.602527	0.220024	Not significant	NO
C17orf55	-0.133	0.605476	0.217903	Not significant	NO
BEAN	-0.116	0.607011	0.216804	Not significant	NO
MXI1	-0.031	0.607011	0.216804	Not significant	YES
C10orf79	-0.144	0.607282	0.21661	Not significant	NO
ZNF704	-0.056	0.608189	0.215961	Not significant	YES
DALRD3	-0.018	0.61081	0.214094	Not significant	NO
FAM162A	-0.02	0.61081	0.214094	Not significant	NO
LOC375190	0.03	0.61081	0.214094	Not significant	NO
MCHR1	-0.158	0.61081	0.214094	Not significant	NO
MREG	-0.04	0.61081	0.214094	Not significant	YES
PFDN6	-0.025	0.61081	0.214094	Not significant	NO
PKDREJ	0.05	0.61081	0.214094	Not significant	NO
PAPOLG	0.016	0.610967	0.213983	Not significant	NO
GEMIN8P4	-0.034	0.615609	0.210695	Not significant	NO
PRRT4	-0.152	0.615609	0.210695	Not significant	NO
RDH5	-0.093	0.615609	0.210695	Not significant	NO
KIAA1522	-0.051	0.619817	0.207737	Not significant	NO
STAM	-0.03	0.621092	0.206844	Not significant	NO
HAGH	-0.022	0.621178	0.206784	Not significant	NO
HPDL	-0.073	0.62161	0.206482	Not significant	NO
MT1M	-0.139	0.621937	0.206253	Not significant	NO
PDIA3P	-0.016	0.621937	0.206253	Not significant	NO
PMEPA1	0.086	0.621937	0.206253	Not significant	NO
RIMKLA	-0.092	0.621937	0.206253	Not significant	YES
SKP1	-0.012	0.621937	0.206253	Not significant	YES
SMCR7	-0.019	0.621937	0.206253	Not significant	NO
ALG3	-0.027	0.623011	0.205504	Not significant	NO
CD55	-0.055	0.623011	0.205504	Not significant	NO
CSF1	0.046	0.623011	0.205504	Not significant	NO
DLAT	-0.016	0.623011	0.205504	Not significant	NO
EHHADH	-0.026	0.623011	0.205504	Not significant	NO
FAM22F	0.032	0.623011	0.205504	Not significant	NO
HSD17B14	-0.065	0.623011	0.205504	Not significant	NO
KRT17	-0.167	0.623011	0.205504	Not significant	NO
NOX4	-0.097	0.623011	0.205504	Not significant	NO
PTGFRN	-0.042	0.623011	0.205504	Not significant	NO
TXNL4A	-0.018	0.623011	0.205504	Not significant	NO
CYP1A1	-0.133	0.628819	0.201474	Not significant	NO
DUSP4	-0.034	0.628819	0.201474	Not significant	YES
ENTPD6	-0.023	0.628819	0.201474	Not significant	YES
MRP63	-0.016	0.628819	0.201474	Not significant	YES
SLC35D1	0.017	0.628819	0.201474	Not significant	NO
WISP1	0.06	0.628819	0.201474	Not significant	NO
LOC344967	-0.083	0.628848	0.201455	Not significant	NO
FKBP1AP1	-0.097	0.628974	0.201367	Not significant	NO
CHMP2A	-0.017	0.629517	0.200992	Not significant	NO
CYB5D1	-0.014	0.629517	0.200992	Not significant	NO
WBSCR22	-0.017	0.629517	0.200992	Not significant	NO
C2orf27A	0.04	0.632706	0.198798	Not significant	NO
NANOS1	-0.051	0.632706	0.198798	Not significant	NO
B3GNT1	-0.018	0.635325	0.197004	Not significant	NO
RAB26	-0.104	0.635578	0.196831	Not significant	YES
YIPF3	-0.015	0.635578	0.196831	Not significant	NO
BDH1	-0.044	0.638261	0.195002	Not significant	NO
PDE11A	-0.124	0.640463	0.193506	Not significant	YES
KRT5	-0.158	0.641537	0.192778	Not significant	NO
CCDC51	-0.016	0.642504	0.192124	Not significant	NO
GALNT3	-0.061	0.642504	0.192124	Not significant	NO
MRPS33	-0.016	0.642504	0.192124	Not significant	NO
TRIM2	-0.046	0.642504	0.192124	Not significant	YES
ZSWIM4	0.017	0.642504	0.192124	Not significant	YES
ADM	-0.064	0.644593	0.190714	Not significant	NO
ALMS1	0.013	0.644593	0.190714	Not significant	YES
ATP9A	-0.049	0.644593	0.190714	Not significant	YES
C1orf174	0.01	0.644593	0.190714	Not significant	NO
CAMK1D	0.063	0.644593	0.190714	Not significant	YES
COX6A1	-0.022	0.644593	0.190714	Not significant	NO
CPA2	-0.093	0.644593	0.190714	Not significant	NO
DHRS2	-0.117	0.644593	0.190714	Not significant	NO
FRMD4A	0.03	0.644593	0.190714	Not significant	NO
GTF2IRD1	-0.023	0.644593	0.190714	Not significant	NO
LGI4	-0.097	0.644593	0.190714	Not significant	NO
LOH3CR2A	0.039	0.644593	0.190714	Not significant	NO
MOBKL1B	0.017	0.644593	0.190714	Not significant	NO
MPDU1	-0.019	0.644593	0.190714	Not significant	NO
MYBL1	0.033	0.644593	0.190714	Not significant	NO
NAT14	-0.024	0.644593	0.190714	Not significant	NO
PCSK1	-0.126	0.644593	0.190714	Not significant	NO
PHLDA1	-0.024	0.644593	0.190714	Not significant	NO
PON2	-0.019	0.644593	0.190714	Not significant	NO
PPARGC1A	-0.094	0.644593	0.190714	Not significant	NO
RAB3A	-0.042	0.644593	0.190714	Not significant	NO
SENP3	-0.011	0.644593	0.190714	Not significant	NO
SH2D5	-0.104	0.644593	0.190714	Not significant	YES
TMOD1	-0.049	0.644593	0.190714	Not significant	NO
UBXN10	-0.082	0.644593	0.190714	Not significant	NO
WFDC1	-0.133	0.644593	0.190714	Not significant	NO
WNK4	-0.096	0.644593	0.190714	Not significant	NO
YWHAE	-0.01	0.644593	0.190714	Not significant	NO
ADSS	-0.012	0.644701	0.190642	Not significant	NO
CLCN7	-0.032	0.644701	0.190642	Not significant	NO
DACT1	0.052	0.644701	0.190642	Not significant	NO
EIF4EBP3	-0.035	0.644701	0.190642	Not significant	NO
FLRT1	0.083	0.644701	0.190642	Not significant	NO
G6PC3	-0.025	0.644701	0.190642	Not significant	NO
GAMT	-0.047	0.644701	0.190642	Not significant	NO
KIF9	-0.017	0.644701	0.190642	Not significant	NO
LSMD1	-0.023	0.644701	0.190642	Not significant	NO
PDIA3	-0.014	0.644701	0.190642	Not significant	NO
PRDM2	0.012	0.644701	0.190642	Not significant	NO
SIRT5	-0.014	0.644701	0.190642	Not significant	NO
SOX13	-0.031	0.644701	0.190642	Not significant	NO
TKT	-0.026	0.644701	0.190642	Not significant	YES
USP22	-0.013	0.644701	0.190642	Not significant	NO
AEBP1	-0.039	0.645281	0.190251	Not significant	NO
LY6E	-0.044	0.645571	0.190056	Not significant	YES
ECM1	-0.061	0.646481	0.189444	Not significant	NO
TLN2	0.023	0.646481	0.189444	Not significant	NO
ZNF469	0.055	0.646481	0.189444	Not significant	NO
RTN4R	-0.068	0.646919	0.18915	Not significant	NO
KLF3	0.011	0.647028	0.189077	Not significant	NO
BCAP31	-0.017	0.647472	0.188779	Not significant	NO
BAAT	-0.137	0.648434	0.188135	Not significant	NO
CALM2	0.011	0.653395	0.184825	Not significant	NO
COL24A1	-0.108	0.653395	0.184825	Not significant	NO
CPB2	-0.119	0.653395	0.184825	Not significant	NO
LOC550112	-0.02	0.653395	0.184825	Not significant	NO
LOH12CR1	-0.014	0.653395	0.184825	Not significant	NO
RBM19	-0.009	0.653395	0.184825	Not significant	NO
ACAT1	-0.015	0.653663	0.184646	Not significant	NO
C12orf76	-0.021	0.653663	0.184646	Not significant	NO
OSBPL1A	-0.017	0.655628	0.183342	Not significant	NO
SRP14	-0.01	0.655628	0.183342	Not significant	NO
SYT14	-0.093	0.655628	0.183342	Not significant	YES
GPI	-0.024	0.658565	0.181402	Not significant	NO
PGK1	-0.013	0.658565	0.181402	Not significant	YES
PLXNA1	-0.02	0.658565	0.181402	Not significant	YES
ZADH2	-0.013	0.658565	0.181402	Not significant	YES
CFL2	-0.015	0.660442	0.180165	Not significant	NO
SELENBP1	-0.061	0.660442	0.180165	Not significant	NO
BCAT2	-0.019	0.660506	0.180123	Not significant	NO
FZD9	-0.071	0.660506	0.180123	Not significant	NO
GAPDH	-0.024	0.660506	0.180123	Not significant	NO
HYI	0.023	0.660506	0.180123	Not significant	NO
MSI1	-0.117	0.660506	0.180123	Not significant	NO
PLA1A	-0.089	0.660506	0.180123	Not significant	NO
RAI1	-0.017	0.660506	0.180123	Not significant	NO
TMED3	-0.017	0.660506	0.180123	Not significant	YES
USP24	0.011	0.660506	0.180123	Not significant	NO
ELAC2	-0.011	0.661441	0.179509	Not significant	NO
ARNTL	0.017	0.661766	0.179295	Not significant	YES
DDIT4L	-0.094	0.661766	0.179295	Not significant	NO
FZD6	-0.041	0.661766	0.179295	Not significant	NO
RNF217	0.039	0.661766	0.179295	Not significant	YES
SPOCD1	0.073	0.661766	0.179295	Not significant	YES
TTYH1	-0.104	0.661766	0.179295	Not significant	NO
ZFP36L2	0.014	0.661766	0.179295	Not significant	NO
SHC2	-0.066	0.662329	0.178926	Not significant	NO
DIABLO	-0.009	0.663097	0.178423	Not significant	NO
HIVEP3	0.027	0.663097	0.178423	Not significant	YES
HS3ST2	-0.095	0.663097	0.178423	Not significant	NO
LMAN2	-0.013	0.663097	0.178423	Not significant	NO
METTL1	-0.021	0.663097	0.178423	Not significant	NO
PAFAH1B3	-0.023	0.663097	0.178423	Not significant	NO
STX3	-0.021	0.663097	0.178423	Not significant	NO
YIPF4	0.009	0.663097	0.178423	Not significant	YES
KIAA1191	-0.009	0.666075	0.176477	Not significant	YES
KLF14	-0.092	0.668729	0.17475	Not significant	NO
C1orf97	-0.021	0.67087	0.173361	Not significant	NO
MAPK7	-0.014	0.67087	0.173361	Not significant	NO
ISYNA1	-0.031	0.671086	0.173222	Not significant	YES
LOC401052	-0.025	0.671086	0.173222	Not significant	NO
RGL3	-0.07	0.671086	0.173222	Not significant	YES
ARPC1A	-0.011	0.672358	0.172399	Not significant	NO
DUSP7	0.014	0.672358	0.172399	Not significant	NO
HIST1H4H	-0.043	0.672358	0.172399	Not significant	NO
LRRK1	0.028	0.672358	0.172399	Not significant	NO
MLH1	-0.008	0.672358	0.172399	Not significant	NO
MPI	-0.014	0.672358	0.172399	Not significant	NO
PHPT1	-0.023	0.672358	0.172399	Not significant	NO
RHPN2	-0.029	0.672358	0.172399	Not significant	NO
STAMBP	0.008	0.672358	0.172399	Not significant	NO
CHRM1	-0.114	0.673572	0.171616	Not significant	YES
SLC4A1AP	0.007	0.673572	0.171616	Not significant	NO
TRAF3	0.012	0.673572	0.171616	Not significant	NO
AG2	-0.04	0.673842	0.171442	Not significant	NO
CEP170L	0.04	0.673842	0.171442	Not significant	NO
CSTB	-0.034	0.673842	0.171442	Not significant	NO
CYGB	-0.061	0.673842	0.171442	Not significant	NO
HIST1H2BN	-0.068	0.673842	0.171442	Not significant	YES
HSPB1	-0.029	0.673842	0.171442	Not significant	NO
IFT81	-0.024	0.673842	0.171442	Not significant	NO
LOC284441	0.014	0.673842	0.171442	Not significant	NO
NME4	-0.022	0.673842	0.171442	Not significant	NO
C12orf52	-0.012	0.673946	0.171375	Not significant	YES
PCYT1B	-0.081	0.674024	0.171324	Not significant	NO
EDNRB	-0.041	0.674073	0.171293	Not significant	NO
SCO1	-0.009	0.674073	0.171293	Not significant	YES
HSPA9	-0.01	0.674136	0.171252	Not significant	NO
LOC344595	-0.021	0.674136	0.171252	Not significant	NO
EEF1A2	-0.101	0.674548	0.170987	Not significant	NO
ASGR2	0.059	0.674734	0.170867	Not significant	NO
SGSH	-0.015	0.674734	0.170867	Not significant	YES
MIA	-0.057	0.679004	0.168128	Not significant	NO
TARS2	-0.013	0.681905	0.166276	Not significant	NO
TRAP1	-0.012	0.681905	0.166276	Not significant	NO
SLITRK2	-0.066	0.683509	0.165256	Not significant	NO
ATL1	-0.032	0.686425	0.163407	Not significant	NO
ATP6V1H	-0.011	0.686425	0.163407	Not significant	NO
C11orf1	-0.016	0.686425	0.163407	Not significant	NO
DLX3	-0.117	0.686425	0.163407	Not significant	YES
FRMD6	0.025	0.686425	0.163407	Not significant	NO
SLC2A10	-0.046	0.686425	0.163407	Not significant	NO
SORBS3	-0.022	0.686425	0.163407	Not significant	YES
SREBF1	-0.02	0.686425	0.163407	Not significant	NO
TOMM6	-0.011	0.686425	0.163407	Not significant	NO
WDR63	-0.084	0.686425	0.163407	Not significant	NO
WDR90	-0.017	0.686425	0.163407	Not significant	NO
ALDH9A1	-0.011	0.693579	0.158904	Not significant	NO
COX5A	-0.012	0.693579	0.158904	Not significant	NO
UPK1A	-0.103	0.693579	0.158904	Not significant	NO
HIVEP2	0.016	0.693652	0.158858	Not significant	NO
NDUFA7	-0.015	0.693652	0.158858	Not significant	NO
PLCB4	-0.076	0.693652	0.158858	Not significant	NO
AVPI1	-0.039	0.693871	0.158721	Not significant	NO
CDH3	-0.07	0.693871	0.158721	Not significant	NO
CNNM1	-0.054	0.693871	0.158721	Not significant	YES
CSNK2B	-0.012	0.693871	0.158721	Not significant	NO
DHRS13	-0.021	0.693871	0.158721	Not significant	NO
IFT88	-0.018	0.693871	0.158721	Not significant	NO
KIAA0319L	-0.009	0.693871	0.158721	Not significant	YES
LOC100130015	-0.029	0.693871	0.158721	Not significant	NO
LRRC8E	-0.061	0.693871	0.158721	Not significant	NO
MAP7D2	-0.09	0.693871	0.158721	Not significant	YES
MLEC	-0.01	0.693871	0.158721	Not significant	NO
OGDHL	-0.105	0.693871	0.158721	Not significant	NO
PDIA5	-0.016	0.693871	0.158721	Not significant	NO
PPP1R16A	-0.016	0.693871	0.158721	Not significant	NO
TCTA	-0.014	0.693871	0.158721	Not significant	NO
PTP4A2	0.008	0.695015	0.158006	Not significant	NO
PTPRM	-0.017	0.695015	0.158006	Not significant	NO
SOX9	-0.065	0.695015	0.158006	Not significant	NO
HIST1H3D	-0.052	0.696627	0.156999	Not significant	NO
MT2A	-0.042	0.69721	0.156636	Not significant	NO
C17orf97	-0.033	0.699678	0.155102	Not significant	YES
PAPPA	0.072	0.702666	0.153251	Not significant	YES
C16orf62	-0.009	0.703185	0.15293	Not significant	NO
CX3CR1	0.052	0.703185	0.15293	Not significant	NO
DHPS	-0.01	0.703185	0.15293	Not significant	NO
DNAJB6	-0.009	0.703185	0.15293	Not significant	NO
DNM3	0.045	0.703185	0.15293	Not significant	YES
EFNB3	-0.055	0.703185	0.15293	Not significant	NO
FAHD1	-0.01	0.703185	0.15293	Not significant	YES
FAM131A	-0.012	0.703185	0.15293	Not significant	NO
FREM2	-0.085	0.703185	0.15293	Not significant	YES
HDAC9	0.047	0.703185	0.15293	Not significant	NO
KIF6	-0.044	0.703185	0.15293	Not significant	YES
LOC100302401	-0.025	0.703185	0.15293	Not significant	NO
LOC388789	-0.009	0.703185	0.15293	Not significant	NO
LOC646762	-0.019	0.703185	0.15293	Not significant	NO
LRPAP1	-0.02	0.703185	0.15293	Not significant	YES
NRBP2	-0.022	0.703185	0.15293	Not significant	NO
PHB	-0.01	0.703185	0.15293	Not significant	NO
PHLPP1	-0.02	0.703185	0.15293	Not significant	NO
PODNL1	-0.072	0.703185	0.15293	Not significant	YES
RBP7	-0.045	0.703185	0.15293	Not significant	NO
SLAMF9	-0.098	0.703185	0.15293	Not significant	NO
SNRNP40	0.008	0.703185	0.15293	Not significant	NO
SOD1	-0.012	0.703185	0.15293	Not significant	NO
SPTB	-0.034	0.703185	0.15293	Not significant	NO
SSX2IP	-0.023	0.703185	0.15293	Not significant	NO
TTC7A	0.018	0.703185	0.15293	Not significant	NO
UAP1L1	-0.018	0.703185	0.15293	Not significant	YES
ULK3	-0.011	0.703185	0.15293	Not significant	NO
WIPI1	-0.029	0.703185	0.15293	Not significant	YES
TMCC2	-0.026	0.704341	0.152217	Not significant	NO
NQO2	-0.02	0.708722	0.149524	Not significant	YES
STOX1	-0.052	0.708722	0.149524	Not significant	NO
JAK1	0.008	0.710359	0.148522	Not significant	NO
MAP3K14	0.014	0.710359	0.148522	Not significant	NO
PDF	-0.011	0.710359	0.148522	Not significant	NO
SEC11C	-0.014	0.710359	0.148522	Not significant	NO
TMED9	-0.009	0.710359	0.148522	Not significant	NO
TMEM208	-0.014	0.710359	0.148522	Not significant	NO
C6orf97	0.038	0.711083	0.14808	Not significant	NO
F2RL2	-0.078	0.711083	0.14808	Not significant	NO
MYO5B	-0.068	0.711083	0.14808	Not significant	YES
PNO1	0.007	0.711083	0.14808	Not significant	NO
RUNX1T1	0.051	0.711083	0.14808	Not significant	NO
TARBP2	-0.011	0.711083	0.14808	Not significant	NO
UNC80	-0.06	0.711083	0.14808	Not significant	NO
C11orf9	-0.055	0.71175	0.147673	Not significant	NO
CA11	-0.024	0.71175	0.147673	Not significant	NO
CTTNBP2NL	0.012	0.71175	0.147673	Not significant	NO
DBN1	-0.019	0.71175	0.147673	Not significant	NO
DSTN	-0.009	0.71175	0.147673	Not significant	YES
HIBCH	-0.013	0.71175	0.147673	Not significant	NO
HIST1H2BE	-0.04	0.71175	0.147673	Not significant	NO
HIST2H2AA3	-0.029	0.71175	0.147673	Not significant	NO
LOC283070	0.035	0.71175	0.147673	Not significant	NO
LOC440957	-0.02	0.71175	0.147673	Not significant	NO
PRDX6	-0.009	0.71175	0.147673	Not significant	NO
TNS3	0.013	0.71175	0.147673	Not significant	NO
MGAT4B	-0.011	0.713784	0.146433	Not significant	NO
MOSC1	-0.064	0.713784	0.146433	Not significant	NO
PCGF2	-0.012	0.713784	0.146433	Not significant	NO
MYLIP	-0.016	0.714606	0.145933	Not significant	NO
ATAD2B	0.012	0.715147	0.145604	Not significant	NO
PPME1	-0.011	0.715147	0.145604	Not significant	NO
TBC1D16	-0.028	0.715147	0.145604	Not significant	YES
ATP1B2	-0.067	0.71772	0.144045	Not significant	NO
BMS1	0.007	0.71772	0.144045	Not significant	NO
CNTFR	-0.097	0.71772	0.144045	Not significant	NO
COL25A1	-0.076	0.71772	0.144045	Not significant	NO
DHRS3	0.033	0.71772	0.144045	Not significant	YES
HIST1H2BJ	-0.032	0.71772	0.144045	Not significant	YES
IFI27L1	-0.019	0.71772	0.144045	Not significant	NO
IGFBP5	0.059	0.71772	0.144045	Not significant	YES
POMP	-0.008	0.71772	0.144045	Not significant	NO
RIMKLB	-0.013	0.71772	0.144045	Not significant	NO
TBCA	-0.009	0.71772	0.144045	Not significant	NO
TF	-0.086	0.71772	0.144045	Not significant	NO
FKBP11	-0.022	0.724689	0.139848	Not significant	NO
ZNF217	0.01	0.724689	0.139848	Not significant	NO
ASL	-0.011	0.725526	0.139347	Not significant	YES
COX7C	-0.01	0.725526	0.139347	Not significant	YES
KREMEN2	-0.053	0.725526	0.139347	Not significant	NO
NRCAM	-0.057	0.725526	0.139347	Not significant	NO
PDCD6	-0.01	0.725526	0.139347	Not significant	NO
PPP1R14C	-0.071	0.725526	0.139347	Not significant	NO
RTN4RL1	-0.066	0.725526	0.139347	Not significant	NO
YWHAG	-0.007	0.725526	0.139347	Not significant	YES
ZNF101	0.012	0.725526	0.139347	Not significant	YES
GIT1	-0.011	0.728485	0.137579	Not significant	NO
ODZ3	0.056	0.728485	0.137579	Not significant	NO
STK17A	0.02	0.728767	0.137411	Not significant	NO
PAQR5	-0.041	0.729076	0.137227	Not significant	YES
CYB5R1	-0.013	0.729575	0.13693	Not significant	NO
NME1	-0.012	0.729729	0.136838	Not significant	NO
PRKG2	-0.088	0.73045	0.136409	Not significant	NO
ARF3	-0.008	0.734405	0.134064	Not significant	NO
AARS2	-0.011	0.734698	0.133891	Not significant	YES
BIVM	-0.018	0.734698	0.133891	Not significant	NO
PLD6	-0.021	0.734698	0.133891	Not significant	YES
PRDM16	0.054	0.734698	0.133891	Not significant	YES
SEMA6A	-0.036	0.735005	0.13371	Not significant	NO
DPP7	-0.022	0.735231	0.133576	Not significant	NO
ATP10B	-0.051	0.73685	0.132621	Not significant	YES
LRRC66	0.036	0.73685	0.132621	Not significant	NO
NFE2	-0.063	0.73685	0.132621	Not significant	YES
PTPLA	-0.03	0.73685	0.132621	Not significant	NO
RPL21	-0.069	0.737474	0.132253	Not significant	NO
CARD14	-0.032	0.737488	0.132245	Not significant	NO
GOT1	-0.01	0.737488	0.132245	Not significant	YES
PCDHGA12	-0.063	0.737488	0.132245	Not significant	NO
HIST1H1C	-0.029	0.737809	0.132056	Not significant	YES
RABIF	-0.009	0.737809	0.132056	Not significant	YES
SLC6A8	-0.016	0.737809	0.132056	Not significant	NO
BSCL2	-0.014	0.738441	0.131684	Not significant	NO
DET1	-0.01	0.738441	0.131684	Not significant	NO
LOC100009676	-0.01	0.738441	0.131684	Not significant	NO
CASKIN1	-0.059	0.738855	0.131441	Not significant	NO
ATP5B	-0.01	0.740816	0.13029	Not significant	NO
KCNG3	-0.063	0.740816	0.13029	Not significant	NO
PSMB5	-0.009	0.740816	0.13029	Not significant	NO
PTPN23	-0.011	0.740816	0.13029	Not significant	NO
LGALS3	-0.026	0.743122	0.12894	Not significant	NO
IMP3	-0.009	0.746136	0.127182	Not significant	NO
TRIB2	-0.014	0.746136	0.127182	Not significant	NO
AFAP1L1	-0.017	0.746991	0.126684	Not significant	YES
C18orf56	-0.029	0.746991	0.126684	Not significant	NO
CCDC50	-0.015	0.746991	0.126684	Not significant	NO
CSGALNACT2	0.012	0.746991	0.126684	Not significant	YES
EML2	-0.013	0.746991	0.126684	Not significant	NO
EYA2	0.043	0.746991	0.126684	Not significant	NO
FBXL2	-0.016	0.746991	0.126684	Not significant	YES
GNPTG	-0.01	0.746991	0.126684	Not significant	YES
MAPRE2	0.009	0.746991	0.126684	Not significant	NO
PDHB	-0.006	0.746991	0.126684	Not significant	NO
TMEM101	-0.008	0.746991	0.126684	Not significant	NO
TRIB1	-0.015	0.746991	0.126684	Not significant	NO
GFRA2	0.066	0.747068	0.12664	Not significant	NO
LDLRAD3	-0.012	0.747068	0.12664	Not significant	NO
LHFPL1	-0.063	0.747068	0.12664	Not significant	NO
LYSMD1	-0.009	0.747068	0.12664	Not significant	NO
PICK1	-0.014	0.747068	0.12664	Not significant	NO
BBS5	-0.011	0.747394	0.12645	Not significant	NO
MRPL19	0.006	0.747394	0.12645	Not significant	NO
DHRS7B	-0.01	0.749634	0.125151	Not significant	NO
NNT	-0.015	0.749634	0.125151	Not significant	NO
PTPRF	0.03	0.749634	0.125151	Not significant	YES
RNF14	-0.008	0.749634	0.125151	Not significant	YES
SH3PXD2A	0.016	0.749634	0.125151	Not significant	YES
C20orf29	-0.011	0.751014	0.124352	Not significant	NO
MBP	-0.029	0.751014	0.124352	Not significant	YES
SLC7A4	-0.077	0.752786	0.123328	Not significant	NO
ATP5J2	-0.011	0.752863	0.123284	Not significant	NO
ATP5G3	-0.008	0.753016	0.123196	Not significant	NO
MARCO	-0.061	0.753016	0.123196	Not significant	NO
DDX41	-0.009	0.753247	0.123062	Not significant	NO
BAT5	-0.008	0.753296	0.123034	Not significant	NO
CARD10	0.028	0.753296	0.123034	Not significant	NO
CHP	-0.01	0.753296	0.123034	Not significant	NO
GBAP1	-0.017	0.753296	0.123034	Not significant	NO
PLXNA2	-0.026	0.753296	0.123034	Not significant	NO
SLC5A10	-0.072	0.753296	0.123034	Not significant	YES
TCEAL8	-0.006	0.753296	0.123034	Not significant	NO
VEGFB	-0.014	0.753296	0.123034	Not significant	NO
DUSP9	-0.051	0.755547	0.121739	Not significant	NO
FBXO48	0.011	0.755547	0.121739	Not significant	YES
TMEM107	-0.009	0.755547	0.121739	Not significant	NO
PIGT	-0.01	0.757951	0.120359	Not significant	NO
C2CD4D	-0.028	0.758464	0.120065	Not significant	NO
C13orf1	-0.007	0.760697	0.118788	Not significant	NO
AARSD1	-0.007	0.761431	0.11837	Not significant	NO
ABCA8	-0.073	0.761431	0.11837	Not significant	NO
AGPAT2	-0.02	0.761431	0.11837	Not significant	YES
C15orf23	-0.009	0.761431	0.11837	Not significant	NO
CHL1	-0.046	0.761431	0.11837	Not significant	YES
COPZ1	-0.006	0.761431	0.11837	Not significant	NO
DR1	0.008	0.761431	0.11837	Not significant	YES
EIF2B5	-0.005	0.761431	0.11837	Not significant	YES
EXOSC4	-0.015	0.761431	0.11837	Not significant	NO
FAM27A	-0.023	0.761431	0.11837	Not significant	NO
GSTO1	-0.017	0.761431	0.11837	Not significant	NO
LOXL4	-0.058	0.761431	0.11837	Not significant	YES
LRRC48	-0.026	0.761431	0.11837	Not significant	NO
NT5DC3	-0.018	0.761431	0.11837	Not significant	NO
NUDT15	-0.008	0.761431	0.11837	Not significant	NO
PCDHGA11	-0.057	0.761431	0.11837	Not significant	NO
RPL19P12	-0.02	0.761431	0.11837	Not significant	NO
SMUG1	-0.008	0.761431	0.11837	Not significant	YES
FAT2	-0.057	0.763626	0.117119	Not significant	NO
ACOT4	-0.027	0.763633	0.117115	Not significant	YES
CGREF1	-0.031	0.763633	0.117115	Not significant	NO
MRPS36	-0.007	0.763633	0.117115	Not significant	NO
NFE2L1	-0.007	0.763633	0.117115	Not significant	NO
MAST1	-0.047	0.764346	0.11671	Not significant	NO
APLF	0.009	0.764433	0.116661	Not significant	NO
ARNT2	-0.017	0.764433	0.116661	Not significant	YES
ATP6V1D	-0.007	0.764433	0.116661	Not significant	NO
C1orf183	0.025	0.764433	0.116661	Not significant	NO
C6orf125	-0.011	0.764433	0.116661	Not significant	NO
CA5BP	-0.009	0.764433	0.116661	Not significant	NO
GABRP	-0.063	0.764433	0.116661	Not significant	NO
GTPBP2	-0.007	0.764433	0.116661	Not significant	NO
HIST1H2BC	-0.03	0.764433	0.116661	Not significant	NO
MMS19	-0.007	0.764433	0.116661	Not significant	YES
MTCH1	-0.007	0.764433	0.116661	Not significant	NO
NBL1	-0.031	0.764433	0.116661	Not significant	NO
NLE1	-0.009	0.764433	0.116661	Not significant	NO
NLK	-0.009	0.764433	0.116661	Not significant	NO
ORAI3	-0.009	0.764433	0.116661	Not significant	NO
PCDHGB1	-0.046	0.764433	0.116661	Not significant	NO
PYROXD2	-0.044	0.764433	0.116661	Not significant	NO
REEP2	-0.039	0.764433	0.116661	Not significant	NO
RNF144A	-0.012	0.764433	0.116661	Not significant	NO
RPS6KL1	-0.029	0.764433	0.116661	Not significant	YES
SEPW1	-0.009	0.764433	0.116661	Not significant	NO
SPON2	-0.037	0.764433	0.116661	Not significant	NO
SRGAP1	-0.014	0.764433	0.116661	Not significant	YES
TPP1	-0.012	0.764433	0.116661	Not significant	NO
UFSP1	-0.018	0.764433	0.116661	Not significant	NO
VPS13D	0.007	0.764433	0.116661	Not significant	YES
FAM186A	-0.064	0.764687	0.116517	Not significant	NO
PTTG1	-0.013	0.764687	0.116517	Not significant	NO
ANAPC5	-0.006	0.765919	0.115817	Not significant	NO
C20orf30	-0.006	0.765919	0.115817	Not significant	NO
COX6C	-0.01	0.765919	0.115817	Not significant	NO
CRYM	-0.07	0.765919	0.115817	Not significant	NO
FAM18B2	-0.008	0.765919	0.115817	Not significant	NO
FXR1	-0.007	0.765919	0.115817	Not significant	NO
HINT1	-0.007	0.765919	0.115817	Not significant	NO
HIPK1	0.007	0.765919	0.115817	Not significant	NO
LOC401397	-0.009	0.765919	0.115817	Not significant	NO
LPHN3	0.052	0.765919	0.115817	Not significant	NO
LRIG2	0.008	0.765919	0.115817	Not significant	NO
MDH2	-0.009	0.765919	0.115817	Not significant	NO
MRPS11	-0.008	0.765919	0.115817	Not significant	YES
NDUFA8	-0.009	0.765919	0.115817	Not significant	NO
RBPMS2	-0.039	0.765919	0.115817	Not significant	NO
SMTNL2	-0.064	0.765919	0.115817	Not significant	YES
C1orf95	-0.05	0.766867	0.11528	Not significant	YES
C6orf192	-0.024	0.766867	0.11528	Not significant	NO
CHPT1	-0.009	0.766867	0.11528	Not significant	NO
EFHD1	-0.046	0.766867	0.11528	Not significant	NO
FMO4	-0.015	0.766867	0.11528	Not significant	NO
MNS1	-0.017	0.766867	0.11528	Not significant	NO
SCAMP5	-0.018	0.766867	0.11528	Not significant	NO
SLC25A3	-0.007	0.76789	0.114701	Not significant	NO
ATP6V1G1	-0.007	0.768101	0.114582	Not significant	NO
SOX8	-0.042	0.768101	0.114582	Not significant	NO
ASPHD2	0.013	0.768304	0.114467	Not significant	NO
ITGA3	-0.029	0.768304	0.114467	Not significant	NO
POLR3K	-0.007	0.768304	0.114467	Not significant	NO
PTTG1IP	-0.01	0.768304	0.114467	Not significant	NO
ENO2	-0.026	0.769553	0.113761	Not significant	NO
NDUFAF3	-0.012	0.769812	0.113615	Not significant	YES
C10orf72	0.028	0.772149	0.112299	Not significant	NO
NEU1	-0.008	0.772149	0.112299	Not significant	YES
ANKRD45	-0.051	0.772796	0.111935	Not significant	NO
ALDH3A2	-0.01	0.773789	0.111377	Not significant	NO
C17orf61	-0.01	0.773789	0.111377	Not significant	NO
CCDC75	0.013	0.773789	0.111377	Not significant	NO
GPN1	0.005	0.773789	0.111377	Not significant	NO
HCG4	-0.048	0.773789	0.111377	Not significant	NO
KCNC4	0.012	0.773789	0.111377	Not significant	YES
LOC645323	-0.045	0.773789	0.111377	Not significant	NO
NDUFS4	-0.007	0.773789	0.111377	Not significant	NO
NFKBIL2	-0.014	0.773789	0.111377	Not significant	NO
NGFRAP1	-0.011	0.773789	0.111377	Not significant	NO
PI15	-0.054	0.773789	0.111377	Not significant	NO
PLXNA4	0.043	0.773789	0.111377	Not significant	YES
SLC35D2	-0.009	0.773789	0.111377	Not significant	NO
SNRNP35	-0.009	0.773789	0.111377	Not significant	NO
ST7	-0.012	0.773789	0.111377	Not significant	NO
TLR7	0.031	0.773789	0.111377	Not significant	NO
TXN	-0.01	0.773789	0.111377	Not significant	NO
UHRF1	0.014	0.773789	0.111377	Not significant	NO
ARV1	-0.007	0.776579	0.109814	Not significant	NO
ATP6V0E2	-0.018	0.776579	0.109814	Not significant	NO
DNAJA4	-0.03	0.776579	0.109814	Not significant	NO
NDUFA2	-0.009	0.776579	0.109814	Not significant	NO
NDUFA3	-0.014	0.776579	0.109814	Not significant	NO
NRTN	-0.048	0.776579	0.109814	Not significant	NO
P2RX6	-0.029	0.776579	0.109814	Not significant	NO
SLC27A3	-0.039	0.776579	0.109814	Not significant	NO
TPI1	-0.009	0.776579	0.109814	Not significant	NO
CBR1	-0.009	0.776607	0.109798	Not significant	NO
COL9A3	-0.048	0.776607	0.109798	Not significant	NO
KCNJ14	0.012	0.776607	0.109798	Not significant	NO
PCDHB8	-0.041	0.776607	0.109798	Not significant	NO
PDZRN3	-0.023	0.776607	0.109798	Not significant	NO
TCF25	-0.007	0.776607	0.109798	Not significant	NO
UBB	-0.009	0.776607	0.109798	Not significant	YES
ALDH3A1	-0.063	0.776888	0.109641	Not significant	NO
TTC23L	-0.041	0.776888	0.109641	Not significant	NO
ABCB8	-0.011	0.778053	0.108991	Not significant	NO
B3GALT2	0.043	0.778053	0.108991	Not significant	NO
CMBL	-0.04	0.778053	0.108991	Not significant	YES
CUTA	-0.01	0.778053	0.108991	Not significant	NO
DNAJC30	-0.01	0.778053	0.108991	Not significant	YES
GAS8	-0.008	0.778053	0.108991	Not significant	NO
HERPUD2	0.005	0.778053	0.108991	Not significant	YES
MST1	-0.02	0.778053	0.108991	Not significant	NO
PAX3	-0.02	0.778053	0.108991	Not significant	NO
SETD6	-0.007	0.778053	0.108991	Not significant	NO
ZFP106	-0.018	0.778053	0.108991	Not significant	NO
ZNF280B	-0.014	0.778053	0.108991	Not significant	NO
BBC3	-0.015	0.781166	0.107257	Not significant	NO
BRSK2	-0.05	0.781166	0.107257	Not significant	NO
CTGF	0.026	0.781166	0.107257	Not significant	NO
NDUFB9	-0.009	0.781166	0.107257	Not significant	YES
RAB8B	0.009	0.781166	0.107257	Not significant	NO
RNASE1	-0.03	0.781166	0.107257	Not significant	YES
TPD52	-0.014	0.781166	0.107257	Not significant	YES
TYRO3	-0.013	0.781166	0.107257	Not significant	NO
C1orf182	-0.05	0.781717	0.10695	Not significant	NO
TRAPPC2L	-0.01	0.781717	0.10695	Not significant	NO
CPEB2	-0.015	0.78193	0.106832	Not significant	NO
EIF5	0.007	0.782825	0.106335	Not significant	NO
ANKRD37	-0.019	0.783151	0.106154	Not significant	NO
BATF3	0.019	0.783151	0.106154	Not significant	NO
BMP7	-0.061	0.783151	0.106154	Not significant	YES
CCDC90A	-0.006	0.783151	0.106154	Not significant	NO
IGSF8	-0.018	0.783151	0.106154	Not significant	NO
MPZ	-0.054	0.783151	0.106154	Not significant	YES
NDUFV2	-0.006	0.783151	0.106154	Not significant	NO
PIGW	-0.006	0.783151	0.106154	Not significant	NO
SIPA1L1	0.012	0.783151	0.106154	Not significant	NO
VEGFC	0.021	0.783151	0.106154	Not significant	NO
WDR73	-0.006	0.783151	0.106154	Not significant	YES
FOXP1	0.014	0.783898	0.10574	Not significant	YES
CNTN3	-0.063	0.784214	0.105565	Not significant	YES
CDC14A	0.011	0.785556	0.104823	Not significant	NO
FSTL3	0.023	0.785556	0.104823	Not significant	NO
RBCK1	-0.007	0.785556	0.104823	Not significant	NO
NINJ1	-0.014	0.785937	0.104612	Not significant	YES
ARHGAP39	-0.016	0.786053	0.104548	Not significant	NO
ARHGEF37	-0.037	0.786053	0.104548	Not significant	NO
LONP1	-0.008	0.786053	0.104548	Not significant	NO
PCDHGA7	-0.041	0.786053	0.104548	Not significant	NO
PCSK1N	-0.059	0.786053	0.104548	Not significant	NO
POLR2H	-0.006	0.786053	0.104548	Not significant	NO
S100B	-0.027	0.786053	0.104548	Not significant	NO
UNG	-0.006	0.786053	0.104548	Not significant	NO
KIAA1644	0.044	0.786074	0.104537	Not significant	YES
MFAP2	-0.032	0.786074	0.104537	Not significant	YES
NCKIPSD	-0.007	0.786074	0.104537	Not significant	NO
SLC5A4	-0.067	0.786074	0.104537	Not significant	NO
C16orf89	-0.057	0.78849	0.103204	Not significant	NO
MT1F	-0.026	0.78849	0.103204	Not significant	NO
MAMSTR	-0.02	0.788933	0.10296	Not significant	NO
ST7OT3	-0.044	0.788933	0.10296	Not significant	NO
TH1L	-0.006	0.788933	0.10296	Not significant	NO
KIAA1841	0.009	0.789091	0.102873	Not significant	YES
NCRNA00188	-0.012	0.789091	0.102873	Not significant	NO
MRPL46	-0.005	0.791747	0.101414	Not significant	NO
FABP3	-0.026	0.791965	0.101294	Not significant	NO
KDELC1	-0.016	0.791965	0.101294	Not significant	NO
PTPMT1	-0.006	0.791965	0.101294	Not significant	NO
SLC11A2	-0.007	0.791965	0.101294	Not significant	NO
SLC35B2	-0.008	0.791965	0.101294	Not significant	NO
TRPV2	-0.02	0.791965	0.101294	Not significant	YES
PMPCA	-0.007	0.792946	0.100757	Not significant	NO
AMPH	0.044	0.79546	0.0993817	Not significant	NO
CCL18	-0.038	0.79546	0.0993817	Not significant	YES
CLDN1	-0.049	0.79546	0.0993817	Not significant	NO
FIS1	-0.008	0.79546	0.0993817	Not significant	NO
HNRNPH2	-0.005	0.79546	0.0993817	Not significant	NO
IRS2	-0.011	0.79546	0.0993817	Not significant	NO
LAMA1	-0.036	0.79546	0.0993817	Not significant	NO
LOC728819	-0.038	0.79546	0.0993817	Not significant	NO
NFE2L3	0.02	0.79546	0.0993817	Not significant	NO
PET112L	-0.006	0.79546	0.0993817	Not significant	NO
SGPL1	0.006	0.79546	0.0993817	Not significant	NO
WRNIP1	-0.005	0.79546	0.0993817	Not significant	YES
ZMYND8	-0.008	0.79546	0.0993817	Not significant	NO
ZNRF2	0.008	0.79546	0.0993817	Not significant	NO
SEPHS2	-0.006	0.796179	0.0989891	Not significant	NO
PLXNA3	-0.014	0.796547	0.0987885	Not significant	YES
RBM15	0.006	0.796547	0.0987885	Not significant	NO
TSKU	-0.02	0.796547	0.0987885	Not significant	YES
C11orf31	-0.006	0.797026	0.0985275	Not significant	NO
CDC16	-0.008	0.797026	0.0985275	Not significant	NO
ETFB	-0.01	0.797026	0.0985275	Not significant	NO
FAR2	-0.02	0.797026	0.0985275	Not significant	NO
TMEM141	-0.012	0.797026	0.0985275	Not significant	NO
C17orf75	-0.01	0.797066	0.0985055	Not significant	YES
FXYD1	-0.046	0.797066	0.0985055	Not significant	NO
NAPA	-0.008	0.797066	0.0985055	Not significant	YES
STAP2	-0.025	0.797226	0.0984184	Not significant	YES
TAB2	0.007	0.797226	0.0984184	Not significant	NO
C11orf83	-0.01	0.798323	0.0978215	Not significant	NO
DHX37	-0.007	0.798323	0.0978215	Not significant	NO
ENOSF1	-0.008	0.798323	0.0978215	Not significant	NO
GRAMD3	-0.016	0.798323	0.0978215	Not significant	NO
KIAA1539	-0.008	0.798323	0.0978215	Not significant	NO
LOC100130522	-0.033	0.798323	0.0978215	Not significant	NO
LOC678655	-0.007	0.798323	0.0978215	Not significant	NO
NECAB2	-0.06	0.798323	0.0978215	Not significant	NO
PCLO	-0.045	0.798323	0.0978215	Not significant	YES
POLR1C	-0.006	0.798323	0.0978215	Not significant	NO
SLC16A10	-0.021	0.798323	0.0978215	Not significant	YES
SPCS1	-0.005	0.798323	0.0978215	Not significant	YES
TSEN2	-0.005	0.798323	0.0978215	Not significant	NO
IGFBP2	-0.034	0.799731	0.0970561	Not significant	NO
MYO1E	0.008	0.801538	0.0960758	Not significant	YES
PCDHB13	-0.023	0.801538	0.0960758	Not significant	NO
PFAS	-0.007	0.801538	0.0960758	Not significant	YES
ID4	-0.027	0.802377	0.0956215	Not significant	NO
ACADS	-0.014	0.803021	0.0952732	Not significant	NO
ATOX1	-0.015	0.804579	0.0944312	Not significant	YES
C12orf62	-0.006	0.80533	0.094026	Not significant	NO
PCDHB5	-0.04	0.80533	0.094026	Not significant	YES
PSMB7	-0.007	0.805414	0.0939806	Not significant	NO
DSEL	0.025	0.806816	0.0932254	Not significant	YES
HAGHL	-0.018	0.806816	0.0932254	Not significant	NO
FH	-0.006	0.807016	0.093118	Not significant	NO
GOLPH3L	-0.008	0.807016	0.093118	Not significant	NO
SEC11A	-0.005	0.807016	0.093118	Not significant	NO
CDK16	-0.007	0.807395	0.0929141	Not significant	NO
FCGR3B	-0.047	0.807395	0.0929141	Not significant	NO
RNF149	0.006	0.807395	0.0929141	Not significant	YES
C21orf82	-0.027	0.807415	0.0929031	Not significant	NO
ADCK4	-0.007	0.808003	0.0925873	Not significant	NO
B4GALT7	-0.007	0.808003	0.0925873	Not significant	NO
BACH2	0.02	0.808003	0.0925873	Not significant	YES
CYP20A1	0.005	0.808003	0.0925873	Not significant	YES
FLOT1	-0.009	0.808003	0.0925873	Not significant	NO
FMN1	-0.018	0.808003	0.0925873	Not significant	YES
GSS	-0.007	0.808003	0.0925873	Not significant	NO
HSD17B1	-0.032	0.808003	0.0925873	Not significant	NO
HSPE1	-0.006	0.808003	0.0925873	Not significant	NO
NF2	0.006	0.808003	0.0925873	Not significant	YES
NOTCH2NL	-0.008	0.808003	0.0925873	Not significant	NO
NUDT14	-0.012	0.808003	0.0925873	Not significant	NO
REL	0.012	0.808003	0.0925873	Not significant	NO
SAP18	-0.005	0.808003	0.0925873	Not significant	NO
SHMT2	-0.007	0.808003	0.0925873	Not significant	NO
LPL	-0.037	0.808209	0.0924766	Not significant	NO
AIFM3	-0.025	0.808985	0.0920596	Not significant	YES
UBASH3B	0.015	0.808985	0.0920596	Not significant	NO
ABCC5	-0.007	0.810736	0.0911206	Not significant	YES
ATP5G1	-0.008	0.810736	0.0911206	Not significant	YES
ATP6V0A1	-0.009	0.810736	0.0911206	Not significant	NO
SHROOM2	0.016	0.810736	0.0911206	Not significant	NO
SRCRB4D	-0.013	0.810736	0.0911206	Not significant	NO
TPM1	0.011	0.810736	0.0911206	Not significant	NO
TPTE2P1	-0.041	0.810736	0.0911206	Not significant	NO
MYO1D	-0.017	0.811269	0.0908352	Not significant	NO
PYCR2	-0.006	0.811349	0.0907921	Not significant	NO
LAMB2	-0.009	0.812281	0.0902935	Not significant	NO
C14orf128	-0.011	0.81236	0.0902513	Not significant	NO
GPR34	0.021	0.81236	0.0902513	Not significant	NO
SERF2	-0.008	0.812485	0.0901844	Not significant	NO
TSPAN4	-0.01	0.812485	0.0901844	Not significant	NO
RETSAT	-0.012	0.813128	0.0898413	Not significant	YES
CHAC1	-0.027	0.814775	0.0889623	Not significant	NO
GRINA	-0.008	0.814877	0.0889082	Not significant	NO
C17orf81	-0.005	0.816138	0.0882363	Not significant	NO
PALM3	-0.049	0.816926	0.0878173	Not significant	NO
NPAS1	-0.031	0.817066	0.0877429	Not significant	NO
ARHGEF16	-0.037	0.818723	0.0868629	Not significant	NO
HEG1	0.01	0.818723	0.0868629	Not significant	NO
MTF1	0.005	0.818723	0.0868629	Not significant	NO
NOV	0.036	0.818723	0.0868629	Not significant	NO
AP1S1	-0.007	0.818959	0.086738	Not significant	YES
MRPL48	-0.007	0.818959	0.086738	Not significant	YES
ORMDL2	-0.007	0.818959	0.086738	Not significant	NO
ZNF114	-0.033	0.818959	0.086738	Not significant	YES
ANKRD39	-0.01	0.822266	0.0849875	Not significant	NO
BIRC6	0.005	0.822266	0.0849875	Not significant	NO
GPAA1	-0.009	0.822266	0.0849875	Not significant	NO
HIST1H3H	-0.027	0.822266	0.0849875	Not significant	NO
IQCK	-0.011	0.822266	0.0849875	Not significant	YES
LOC728723	-0.017	0.822266	0.0849875	Not significant	NO
RNF7	-0.005	0.822266	0.0849875	Not significant	YES
SULT1C2	-0.04	0.822266	0.0849875	Not significant	YES
TET3	0.008	0.822266	0.0849875	Not significant	YES
TDRD7	-0.012	0.82421	0.083962	Not significant	NO
ATP5G2	-0.007	0.82434	0.0838937	Not significant	NO
C1orf113	-0.016	0.82434	0.0838937	Not significant	NO
C9orf125	-0.033	0.82434	0.0838937	Not significant	NO
CARKD	-0.005	0.82434	0.0838937	Not significant	NO
GABARAPL1	-0.007	0.82434	0.0838937	Not significant	NO
GPR82	0.027	0.82434	0.0838937	Not significant	YES
HARS	-0.005	0.82434	0.0838937	Not significant	YES
HIST2H4A	-0.014	0.82434	0.0838937	Not significant	NO
PAK4	-0.009	0.82434	0.0838937	Not significant	NO
RAB10	0.005	0.82434	0.0838937	Not significant	YES
RFPL1S	0.038	0.82434	0.0838937	Not significant	NO
RPL23P8	-0.008	0.82434	0.0838937	Not significant	NO
SLC48A1	-0.009	0.82434	0.0838937	Not significant	NO
SUSD5	-0.04	0.82434	0.0838937	Not significant	YES
TFPT	-0.008	0.82434	0.0838937	Not significant	NO
WDR61	-0.005	0.82434	0.0838937	Not significant	NO
BEND6	0.021	0.825041	0.0835246	Not significant	NO
CCDC8	-0.028	0.825041	0.0835246	Not significant	NO
LOC220729	-0.006	0.825041	0.0835246	Not significant	NO
MAGEL2	-0.043	0.825041	0.0835246	Not significant	NO
FOLH1	-0.037	0.825566	0.0832482	Not significant	NO
ALG1L	-0.031	0.826348	0.082837	Not significant	NO
ANAPC13	-0.005	0.826348	0.082837	Not significant	NO
ATP10A	-0.021	0.826348	0.082837	Not significant	NO
CAB39	0.005	0.826348	0.082837	Not significant	NO
HEXIM2	-0.009	0.826348	0.082837	Not significant	NO
HIBADH	-0.007	0.826348	0.082837	Not significant	NO
MRFAP1	-0.004	0.826348	0.082837	Not significant	NO
MVK	-0.009	0.826348	0.082837	Not significant	YES
PCDHGB2	-0.03	0.826348	0.082837	Not significant	NO
PTCD2	-0.005	0.826348	0.082837	Not significant	YES
RWDD2B	-0.006	0.826348	0.082837	Not significant	NO
ZSWIM6	0.006	0.826348	0.082837	Not significant	NO
METTL9	-0.008	0.826497	0.0827589	Not significant	NO
ATP6V1E1	-0.005	0.829065	0.0814114	Not significant	NO
EPHX4	-0.043	0.829065	0.0814114	Not significant	NO
MLLT1	0.006	0.829065	0.0814114	Not significant	NO
SLC4A2	-0.008	0.829065	0.0814114	Not significant	NO
SPINK5	-0.06	0.829065	0.0814114	Not significant	NO
TBC1D20	-0.005	0.829065	0.0814114	Not significant	NO
C1QTNF3	-0.046	0.829567	0.0811486	Not significant	YES
FMO1	-0.032	0.829567	0.0811486	Not significant	NO
GPR161	-0.016	0.829567	0.0811486	Not significant	YES
LAMB4	-0.052	0.829567	0.0811486	Not significant	NO
LONRF2	-0.037	0.829567	0.0811486	Not significant	YES
NFKB1	0.005	0.829567	0.0811486	Not significant	NO
TALDO1	-0.006	0.829567	0.0811486	Not significant	NO
TCEAL4	-0.005	0.829567	0.0811486	Not significant	NO
ZFAND6	-0.005	0.829567	0.0811486	Not significant	NO
AP2S1	-0.007	0.831134	0.0803291	Not significant	NO
AZIN1	0.006	0.831134	0.0803291	Not significant	YES
C10orf75	-0.011	0.831134	0.0803291	Not significant	NO
C20orf132	-0.015	0.831134	0.0803291	Not significant	NO
CDK20	-0.007	0.831134	0.0803291	Not significant	NO
CHML	-0.014	0.831134	0.0803291	Not significant	NO
CNPY4	-0.007	0.831134	0.0803291	Not significant	NO
COL17A1	-0.058	0.831134	0.0803291	Not significant	NO
COPG	-0.006	0.831134	0.0803291	Not significant	NO
COPS7A	-0.005	0.831134	0.0803291	Not significant	NO
CTDSPL	-0.009	0.831134	0.0803291	Not significant	NO
DSE	0.009	0.831134	0.0803291	Not significant	YES
FIGNL1	0.007	0.831134	0.0803291	Not significant	NO
HSPH1	-0.008	0.831134	0.0803291	Not significant	NO
KIAA1614	-0.016	0.831134	0.0803291	Not significant	NO
LOC388588	-0.024	0.831134	0.0803291	Not significant	NO
MRPL41	-0.012	0.831134	0.0803291	Not significant	NO
PRODH	-0.041	0.831134	0.0803291	Not significant	NO
PRUNE2	-0.036	0.831134	0.0803291	Not significant	NO
RAB3D	-0.012	0.831134	0.0803291	Not significant	NO
RAI14	0.008	0.831134	0.0803291	Not significant	YES
SDK1	0.028	0.831134	0.0803291	Not significant	NO
SH2D4A	-0.031	0.831134	0.0803291	Not significant	YES
SIRPA	-0.011	0.831134	0.0803291	Not significant	YES
TRAPPC4	-0.005	0.831134	0.0803291	Not significant	YES
ABHD14B	-0.008	0.831152	0.0803194	Not significant	NO
ADAMTSL5	-0.02	0.831152	0.0803194	Not significant	NO
ALAD	-0.005	0.831152	0.0803194	Not significant	NO
ALG8	-0.012	0.831152	0.0803194	Not significant	NO
ANXA3	-0.037	0.831152	0.0803194	Not significant	NO
ASPA	-0.029	0.831152	0.0803194	Not significant	YES
ATP5J	-0.005	0.831152	0.0803194	Not significant	NO
ATP6V0C	-0.009	0.831152	0.0803194	Not significant	NO
BAALC	-0.037	0.831152	0.0803194	Not significant	NO
C10orf41	-0.009	0.831152	0.0803194	Not significant	NO
C20orf46	-0.016	0.831152	0.0803194	Not significant	NO
CAMK2N1	0.018	0.831152	0.0803194	Not significant	YES
CANX	-0.005	0.831152	0.0803194	Not significant	NO
CCDC120	-0.009	0.831152	0.0803194	Not significant	NO
CCDC93	0.004	0.831152	0.0803194	Not significant	NO
CDCA8	0.008	0.831152	0.0803194	Not significant	YES
CDH6	0.029	0.831152	0.0803194	Not significant	NO
CDK7	-0.005	0.831152	0.0803194	Not significant	NO
CDR2L	0.013	0.831152	0.0803194	Not significant	NO
CGN	-0.021	0.831152	0.0803194	Not significant	NO
CHN1	0.019	0.831152	0.0803194	Not significant	NO
CLDN12	-0.007	0.831152	0.0803194	Not significant	NO
CLIP4	-0.012	0.831152	0.0803194	Not significant	NO
CLTA	-0.005	0.831152	0.0803194	Not significant	NO
COX17	-0.007	0.831152	0.0803194	Not significant	YES
CYLD	0.008	0.831152	0.0803194	Not significant	NO
CYTL1	-0.034	0.831152	0.0803194	Not significant	NO
DECR2	-0.008	0.831152	0.0803194	Not significant	NO
DFNB31	-0.011	0.831152	0.0803194	Not significant	NO
DHX30	-0.005	0.831152	0.0803194	Not significant	NO
DHX57	0.004	0.831152	0.0803194	Not significant	NO
DRG2	-0.005	0.831152	0.0803194	Not significant	YES
DYNLRB1	-0.007	0.831152	0.0803194	Not significant	NO
DYRK1B	-0.009	0.831152	0.0803194	Not significant	NO
EEF1DP3	-0.033	0.831152	0.0803194	Not significant	NO
EEF1E1	-0.005	0.831152	0.0803194	Not significant	NO
EIF4EBP1	-0.011	0.831152	0.0803194	Not significant	YES
EML4	0.005	0.831152	0.0803194	Not significant	NO
ERP29	-0.006	0.831152	0.0803194	Not significant	YES
FAF1	0.004	0.831152	0.0803194	Not significant	YES
FAM108C1	-0.013	0.831152	0.0803194	Not significant	NO
FAM180B	-0.025	0.831152	0.0803194	Not significant	NO
FAM63A	-0.007	0.831152	0.0803194	Not significant	NO
FGFRL1	-0.022	0.831152	0.0803194	Not significant	NO
FKBP4	-0.007	0.831152	0.0803194	Not significant	YES
FREM1	-0.043	0.831152	0.0803194	Not significant	NO
FUK	-0.007	0.831152	0.0803194	Not significant	NO
GLIS1	0.034	0.831152	0.0803194	Not significant	NO
GPER	-0.019	0.831152	0.0803194	Not significant	NO
GPR176	0.014	0.831152	0.0803194	Not significant	NO
GTF2H4	-0.005	0.831152	0.0803194	Not significant	NO
GYS1	-0.008	0.831152	0.0803194	Not significant	NO
HBEGF	0.013	0.831152	0.0803194	Not significant	NO
HR	-0.022	0.831152	0.0803194	Not significant	NO
HRNR	-0.028	0.831152	0.0803194	Not significant	NO
HSPA4	-0.005	0.831152	0.0803194	Not significant	NO
ITPKB	-0.016	0.831152	0.0803194	Not significant	NO
IVNS1ABP	-0.008	0.831152	0.0803194	Not significant	YES
JMJD8	-0.007	0.831152	0.0803194	Not significant	NO
KCNN1	0.034	0.831152	0.0803194	Not significant	NO
KCTD14	-0.036	0.831152	0.0803194	Not significant	NO
KIAA0141	-0.005	0.831152	0.0803194	Not significant	YES
KIF7	-0.016	0.831152	0.0803194	Not significant	NO
LAPTM4B	-0.008	0.831152	0.0803194	Not significant	NO
LARGE	0.012	0.831152	0.0803194	Not significant	NO
LIG3	-0.005	0.831152	0.0803194	Not significant	NO
LOC100270746	-0.015	0.831152	0.0803194	Not significant	NO
LOC648691	-0.028	0.831152	0.0803194	Not significant	NO
LRRC36	-0.034	0.831152	0.0803194	Not significant	NO
MAP1LC3B	-0.005	0.831152	0.0803194	Not significant	NO
MCF2L	-0.027	0.831152	0.0803194	Not significant	NO
MOAP1	-0.005	0.831152	0.0803194	Not significant	NO
MTF2	0.006	0.831152	0.0803194	Not significant	NO
NDUFA4L2	-0.024	0.831152	0.0803194	Not significant	YES
NFKBIA	0.009	0.831152	0.0803194	Not significant	NO
NHP2	-0.006	0.831152	0.0803194	Not significant	NO
NKIRAS1	-0.006	0.831152	0.0803194	Not significant	NO
NOL7	-0.004	0.831152	0.0803194	Not significant	NO
NOMO1	-0.006	0.831152	0.0803194	Not significant	NO
NPRL2	-0.005	0.831152	0.0803194	Not significant	NO
NUAK1	0.014	0.831152	0.0803194	Not significant	NO
OAZ2	-0.004	0.831152	0.0803194	Not significant	NO
OSTM1	-0.011	0.831152	0.0803194	Not significant	NO
PARD6G	-0.009	0.831152	0.0803194	Not significant	YES
PCDHB11	-0.028	0.831152	0.0803194	Not significant	NO
PCDHGA10	-0.029	0.831152	0.0803194	Not significant	NO
PCDHGA4	-0.026	0.831152	0.0803194	Not significant	NO
PCSK4	-0.017	0.831152	0.0803194	Not significant	NO
PIGQ	-0.007	0.831152	0.0803194	Not significant	YES
PMS2L5	-0.006	0.831152	0.0803194	Not significant	NO
POLR1D	-0.005	0.831152	0.0803194	Not significant	NO
RASD1	-0.028	0.831152	0.0803194	Not significant	NO
RBM20	-0.033	0.831152	0.0803194	Not significant	NO
RGS12	-0.011	0.831152	0.0803194	Not significant	NO
RHOB	0.009	0.831152	0.0803194	Not significant	NO
SALL4	-0.029	0.831152	0.0803194	Not significant	NO
SH3RF3	0.019	0.831152	0.0803194	Not significant	NO
SLC25A5	-0.006	0.831152	0.0803194	Not significant	NO
SLC35A2	-0.005	0.831152	0.0803194	Not significant	NO
SNX10	-0.015	0.831152	0.0803194	Not significant	NO
SPP1	-0.028	0.831152	0.0803194	Not significant	NO
SRI	0.004	0.831152	0.0803194	Not significant	YES
ST6GALNAC2	-0.018	0.831152	0.0803194	Not significant	YES
STMN3	-0.013	0.831152	0.0803194	Not significant	NO
STX7	-0.009	0.831152	0.0803194	Not significant	YES
TIMM8A	-0.005	0.831152	0.0803194	Not significant	YES
TM6SF1	0.01	0.831152	0.0803194	Not significant	NO
TMEM187	-0.007	0.831152	0.0803194	Not significant	NO
TPM4	0.006	0.831152	0.0803194	Not significant	YES
TRAPPC1	-0.007	0.831152	0.0803194	Not significant	NO
TSHZ3	0.015	0.831152	0.0803194	Not significant	NO
TSSK3	0.013	0.831152	0.0803194	Not significant	NO
TUFM	-0.005	0.831152	0.0803194	Not significant	NO
UBE2NL	-0.035	0.831152	0.0803194	Not significant	NO
UNC5B	0.013	0.831152	0.0803194	Not significant	NO
USP30	-0.004	0.831152	0.0803194	Not significant	NO
VDR	0.014	0.831152	0.0803194	Not significant	NO
VKORC1	-0.006	0.831152	0.0803194	Not significant	NO
YPEL4	-0.016	0.831152	0.0803194	Not significant	NO
ZCCHC11	0.006	0.831152	0.0803194	Not significant	NO
ZNF322B	-0.008	0.831152	0.0803194	Not significant	NO
KCNJ12	-0.033	0.831657	0.0800559	Not significant	NO
AIFM1	-0.005	0.833759	0.0789597	Not significant	YES
ATP5I	-0.006	0.833759	0.0789597	Not significant	NO
AXL	0.021	0.833759	0.0789597	Not significant	NO
BMP2K	0.006	0.833759	0.0789597	Not significant	NO
CITED1	-0.026	0.833759	0.0789597	Not significant	NO
DPYD	0.018	0.833759	0.0789597	Not significant	NO
EPHX1	-0.021	0.833759	0.0789597	Not significant	NO
FAM82A2	-0.004	0.833759	0.0789597	Not significant	NO
LOC729603	-0.011	0.833759	0.0789597	Not significant	NO
MEA1	-0.005	0.833759	0.0789597	Not significant	NO
MEIS3	-0.022	0.833759	0.0789597	Not significant	YES
PITPNM3	0.02	0.833759	0.0789597	Not significant	NO
PPM1H	-0.013	0.833759	0.0789597	Not significant	YES
RAB9A	-0.004	0.833759	0.0789597	Not significant	YES
SLC16A6	-0.037	0.833759	0.0789597	Not significant	NO
SYTL4	0.018	0.833759	0.0789597	Not significant	NO
TCN2	-0.014	0.833759	0.0789597	Not significant	NO
TUBB2C	-0.008	0.833759	0.0789597	Not significant	NO
WWC2	0.008	0.833759	0.0789597	Not significant	YES
ZNF430	0.008	0.833759	0.0789597	Not significant	NO
C7orf50	-0.008	0.834403	0.0786242	Not significant	NO
ROPN1L	-0.041	0.834403	0.0786242	Not significant	NO
C6orf114	-0.034	0.835316	0.0781494	Not significant	NO
DRAM2	0.005	0.835316	0.0781494	Not significant	NO
FAM70A	-0.032	0.835316	0.0781494	Not significant	NO
FLJ35024	-0.029	0.835316	0.0781494	Not significant	NO
GGCT	-0.005	0.835316	0.0781494	Not significant	NO
LPAR5	0.014	0.835316	0.0781494	Not significant	NO
NAPB	-0.005	0.835316	0.0781494	Not significant	NO
NECAB3	-0.009	0.835316	0.0781494	Not significant	YES
PER1	-0.009	0.835316	0.0781494	Not significant	NO
PLS1	-0.022	0.835316	0.0781494	Not significant	NO
SRPX2	0.026	0.835316	0.0781494	Not significant	YES
CEP170	0.008	0.835744	0.0779266	Not significant	NO
SLC30A7	0.005	0.835744	0.0779266	Not significant	NO
SPIRE1	-0.007	0.835744	0.0779266	Not significant	NO
VPS18	-0.007	0.835744	0.0779266	Not significant	YES
CNTNAP1	-0.013	0.835851	0.077871	Not significant	NO
CTSL1	-0.011	0.835953	0.0778179	Not significant	NO
STEAP1	-0.014	0.835953	0.0778179	Not significant	NO
KLHL5	0.007	0.837103	0.0772209	Not significant	NO
NUCB1	-0.005	0.837103	0.0772209	Not significant	YES
PIP4K2B	-0.004	0.837103	0.0772209	Not significant	NO
POLR2J3	-0.008	0.837103	0.0772209	Not significant	NO
PPEF1	-0.031	0.837103	0.0772209	Not significant	YES
PTRH1	-0.01	0.837103	0.0772209	Not significant	NO
SLC6A15	-0.018	0.837103	0.0772209	Not significant	NO
RGS11	-0.034	0.837267	0.0771363	Not significant	NO
LOC650623	0.015	0.838602	0.076444	Not significant	NO
LOC729799	-0.008	0.838602	0.076444	Not significant	NO
FAM127A	-0.008	0.840565	0.0754286	Not significant	NO
ZNF706	-0.005	0.840565	0.0754286	Not significant	NO
ABCF3	-0.005	0.841075	0.0751655	Not significant	YES
ADI1	-0.005	0.841075	0.0751655	Not significant	YES
AFG3L2	-0.005	0.841075	0.0751655	Not significant	NO
ANKS1A	-0.013	0.841075	0.0751655	Not significant	NO
ANKS1B	-0.033	0.841075	0.0751655	Not significant	NO
ARHGAP32	-0.007	0.841075	0.0751655	Not significant	YES
ARMCX1	-0.007	0.841075	0.0751655	Not significant	NO
ATP5O	-0.004	0.841075	0.0751655	Not significant	NO
ATP6AP1	-0.007	0.841075	0.0751655	Not significant	NO
ATP6V1F	-0.007	0.841075	0.0751655	Not significant	NO
BAT3	-0.005	0.841075	0.0751655	Not significant	NO
BOK	-0.019	0.841075	0.0751655	Not significant	NO
BPHL	-0.005	0.841075	0.0751655	Not significant	NO
C14orf126	-0.005	0.841075	0.0751655	Not significant	NO
C15orf40	-0.004	0.841075	0.0751655	Not significant	NO
C17orf63	-0.006	0.841075	0.0751655	Not significant	NO
C2orf16	-0.008	0.841075	0.0751655	Not significant	NO
C2orf84	0.013	0.841075	0.0751655	Not significant	NO
C5orf55	-0.009	0.841075	0.0751655	Not significant	YES
C8orf55	-0.008	0.841075	0.0751655	Not significant	NO
CAP1	0.004	0.841075	0.0751655	Not significant	NO
CBR3	-0.009	0.841075	0.0751655	Not significant	NO
CCDC127	-0.005	0.841075	0.0751655	Not significant	NO
CD320	-0.007	0.841075	0.0751655	Not significant	NO
CD3EAP	0.004	0.841075	0.0751655	Not significant	NO
CDK2AP1	-0.006	0.841075	0.0751655	Not significant	NO
CDS2	-0.005	0.841075	0.0751655	Not significant	NO
CHCHD5	-0.006	0.841075	0.0751655	Not significant	NO
CHKA	-0.007	0.841075	0.0751655	Not significant	NO
COQ7	-0.004	0.841075	0.0751655	Not significant	YES
COX7B	-0.005	0.841075	0.0751655	Not significant	NO
CPXM1	-0.023	0.841075	0.0751655	Not significant	NO
CYSLTR1	0.017	0.841075	0.0751655	Not significant	YES
DDIT3	-0.008	0.841075	0.0751655	Not significant	NO
DNAJC19	-0.004	0.841075	0.0751655	Not significant	NO
DYRK2	0.007	0.841075	0.0751655	Not significant	NO
EIF4G1	-0.004	0.841075	0.0751655	Not significant	NO
EMP3	-0.01	0.841075	0.0751655	Not significant	NO
ENDOD1	-0.007	0.841075	0.0751655	Not significant	NO
ERGIC3	-0.005	0.841075	0.0751655	Not significant	NO
ETV6	0.004	0.841075	0.0751655	Not significant	NO
EXOC4	-0.004	0.841075	0.0751655	Not significant	NO
FAM83H	-0.012	0.841075	0.0751655	Not significant	YES
FAM84B	-0.022	0.841075	0.0751655	Not significant	NO
FAM95B1	-0.019	0.841075	0.0751655	Not significant	NO
FBXL8	-0.008	0.841075	0.0751655	Not significant	NO
FDXR	-0.01	0.841075	0.0751655	Not significant	NO
FGF1	-0.023	0.841075	0.0751655	Not significant	NO
FKBP1A	-0.005	0.841075	0.0751655	Not significant	NO
FRAS1	-0.026	0.841075	0.0751655	Not significant	NO
GBA	-0.01	0.841075	0.0751655	Not significant	YES
GCAT	-0.009	0.841075	0.0751655	Not significant	NO
GDF11	-0.012	0.841075	0.0751655	Not significant	YES
GNPDA1	-0.005	0.841075	0.0751655	Not significant	NO
GOLGA2	-0.004	0.841075	0.0751655	Not significant	NO
GOLM1	-0.007	0.841075	0.0751655	Not significant	NO
GPC1	0.019	0.841075	0.0751655	Not significant	NO
GPR89A	-0.004	0.841075	0.0751655	Not significant	NO
GPS2	-0.005	0.841075	0.0751655	Not significant	NO
GPSM2	0.007	0.841075	0.0751655	Not significant	YES
HARS2	-0.004	0.841075	0.0751655	Not significant	NO
HDHD2	-0.004	0.841075	0.0751655	Not significant	NO
HEY1	-0.015	0.841075	0.0751655	Not significant	NO
HIGD2A	-0.007	0.841075	0.0751655	Not significant	NO
HSPD1	-0.005	0.841075	0.0751655	Not significant	NO
IL7R	0.027	0.841075	0.0751655	Not significant	YES
IL9R	0.019	0.841075	0.0751655	Not significant	YES
INPP5F	-0.009	0.841075	0.0751655	Not significant	NO
KCTD10	-0.004	0.841075	0.0751655	Not significant	NO
LETMD1	-0.005	0.841075	0.0751655	Not significant	YES
LOC100130093	-0.008	0.841075	0.0751655	Not significant	NO
LOC113230	-0.019	0.841075	0.0751655	Not significant	NO
LOC115110	-0.01	0.841075	0.0751655	Not significant	NO
LRGUK	-0.022	0.841075	0.0751655	Not significant	NO
LRRC15	0.029	0.841075	0.0751655	Not significant	YES
MANSC1	-0.012	0.841075	0.0751655	Not significant	NO
MAP3K12	-0.005	0.841075	0.0751655	Not significant	YES
MARK2	0.004	0.841075	0.0751655	Not significant	NO
MBOAT1	-0.007	0.841075	0.0751655	Not significant	NO
MESDC1	-0.008	0.841075	0.0751655	Not significant	NO
MET	-0.021	0.841075	0.0751655	Not significant	NO
MGC42105	0.025	0.841075	0.0751655	Not significant	NO
MGC70857	-0.007	0.841075	0.0751655	Not significant	NO
MIF	-0.011	0.841075	0.0751655	Not significant	NO
MNT	-0.004	0.841075	0.0751655	Not significant	YES
MRPL17	-0.005	0.841075	0.0751655	Not significant	YES
MRPL21	-0.007	0.841075	0.0751655	Not significant	NO
MRRF	-0.005	0.841075	0.0751655	Not significant	YES
MSRB2	-0.009	0.841075	0.0751655	Not significant	NO
MSTO2P	-0.007	0.841075	0.0751655	Not significant	NO
MT1X	-0.013	0.841075	0.0751655	Not significant	NO
MUC5B	-0.034	0.841075	0.0751655	Not significant	NO
NEURL4	-0.004	0.841075	0.0751655	Not significant	NO
NIT1	-0.005	0.841075	0.0751655	Not significant	NO
NME2P1	-0.01	0.841075	0.0751655	Not significant	NO
NOP16	-0.005	0.841075	0.0751655	Not significant	NO
NPC1	-0.006	0.841075	0.0751655	Not significant	NO
OSGIN1	-0.015	0.841075	0.0751655	Not significant	NO
P2RY13	0.02	0.841075	0.0751655	Not significant	NO
PCDHGB5	-0.032	0.841075	0.0751655	Not significant	NO
PNKP	-0.006	0.841075	0.0751655	Not significant	NO
POP5	-0.005	0.841075	0.0751655	Not significant	NO
POR	-0.006	0.841075	0.0751655	Not significant	NO
PPAPDC1B	-0.006	0.841075	0.0751655	Not significant	NO
PRDX2	-0.015	0.841075	0.0751655	Not significant	NO
PRR7	-0.012	0.841075	0.0751655	Not significant	NO
PTX3	0.026	0.841075	0.0751655	Not significant	NO
PXMP4	-0.005	0.841075	0.0751655	Not significant	YES
RAP1A	0.005	0.841075	0.0751655	Not significant	NO
RIMS4	-0.034	0.841075	0.0751655	Not significant	YES
RNF10	-0.004	0.841075	0.0751655	Not significant	NO
RPN2	-0.004	0.841075	0.0751655	Not significant	YES
S100A14	-0.05	0.841075	0.0751655	Not significant	NO
SARS2	-0.005	0.841075	0.0751655	Not significant	YES
SCLT1	0.005	0.841075	0.0751655	Not significant	NO
SEC22C	-0.004	0.841075	0.0751655	Not significant	YES
SETD8	-0.004	0.841075	0.0751655	Not significant	NO
SFRP1	-0.034	0.841075	0.0751655	Not significant	YES
SFRS9	-0.004	0.841075	0.0751655	Not significant	NO
SFXN4	-0.005	0.841075	0.0751655	Not significant	NO
SHPK	-0.005	0.841075	0.0751655	Not significant	NO
SHROOM3	-0.022	0.841075	0.0751655	Not significant	NO
SLC19A3	-0.027	0.841075	0.0751655	Not significant	NO
SMAD3	0.006	0.841075	0.0751655	Not significant	NO
SNIP1	0.004	0.841075	0.0751655	Not significant	NO
SNX30	-0.007	0.841075	0.0751655	Not significant	YES
SPEN	0.004	0.841075	0.0751655	Not significant	NO
ST8SIA6	-0.031	0.841075	0.0751655	Not significant	NO
STAG3L2	-0.008	0.841075	0.0751655	Not significant	NO
STAR	-0.045	0.841075	0.0751655	Not significant	NO
STK4	0.004	0.841075	0.0751655	Not significant	YES
THAP1	0.004	0.841075	0.0751655	Not significant	YES
TLCD1	-0.011	0.841075	0.0751655	Not significant	NO
TMEM117	-0.008	0.841075	0.0751655	Not significant	YES
TMEM14B	-0.004	0.841075	0.0751655	Not significant	NO
TMEM5	-0.005	0.841075	0.0751655	Not significant	NO
TNFRSF11A	0.015	0.841075	0.0751655	Not significant	NO
TNFRSF14	-0.01	0.841075	0.0751655	Not significant	NO
TNIP1	0.005	0.841075	0.0751655	Not significant	NO
TSTA3	-0.007	0.841075	0.0751655	Not significant	NO
UBE2M	-0.005	0.841075	0.0751655	Not significant	NO
URM1	-0.006	0.841075	0.0751655	Not significant	NO
USP43	-0.037	0.841075	0.0751655	Not significant	NO
VN1R1	-0.018	0.841075	0.0751655	Not significant	YES
VSTM2L	-0.028	0.841075	0.0751655	Not significant	NO
WDR13	-0.005	0.841075	0.0751655	Not significant	YES
WIPF3	-0.027	0.841075	0.0751655	Not significant	YES
XRRA1	-0.005	0.841075	0.0751655	Not significant	NO
ZBTB2	0.004	0.841075	0.0751655	Not significant	NO
ZBTB47	-0.007	0.841075	0.0751655	Not significant	YES
ZSWIM7	-0.005	0.841075	0.0751655	Not significant	NO
CSF1R	0.014	0.841852	0.0747645	Not significant	YES
DDX54	-0.005	0.842399	0.0744824	Not significant	NO
DDX55	-0.004	0.842399	0.0744824	Not significant	NO
GSTT2	-0.019	0.842399	0.0744824	Not significant	NO
STK17B	0.013	0.842399	0.0744824	Not significant	NO
AFF2	0.022	0.843058	0.0741428	Not significant	NO
ALDH1L1	-0.041	0.843058	0.0741428	Not significant	YES
ANTXR1	0.01	0.843058	0.0741428	Not significant	NO
ARPM1	-0.009	0.843058	0.0741428	Not significant	NO
ASTN2	-0.016	0.843058	0.0741428	Not significant	NO
C18orf10	-0.004	0.843058	0.0741428	Not significant	NO
C20orf26	-0.041	0.843058	0.0741428	Not significant	NO
C2orf42	0.004	0.843058	0.0741428	Not significant	NO
C3orf21	-0.005	0.843058	0.0741428	Not significant	NO
DDB2	-0.007	0.843058	0.0741428	Not significant	NO
DGAT1	-0.006	0.843058	0.0741428	Not significant	NO
DSP	-0.037	0.843058	0.0741428	Not significant	NO
DVL3	-0.005	0.843058	0.0741428	Not significant	NO
EDIL3	-0.031	0.843058	0.0741428	Not significant	NO
FAHD2A	-0.007	0.843058	0.0741428	Not significant	NO
FANCG	-0.005	0.843058	0.0741428	Not significant	NO
FASN	-0.01	0.843058	0.0741428	Not significant	NO
FEZ1	-0.016	0.843058	0.0741428	Not significant	NO
FLNC	0.028	0.843058	0.0741428	Not significant	NO
GABARAP	-0.005	0.843058	0.0741428	Not significant	NO
GDF1	-0.02	0.843058	0.0741428	Not significant	NO
GPD1L	-0.006	0.843058	0.0741428	Not significant	YES
GPR146	-0.008	0.843058	0.0741428	Not significant	NO
GSTP1	-0.015	0.843058	0.0741428	Not significant	NO
HS6ST1	0.005	0.843058	0.0741428	Not significant	NO
HYOU1	-0.006	0.843058	0.0741428	Not significant	NO
IRF4	-0.014	0.843058	0.0741428	Not significant	NO
KIAA0528	0.004	0.843058	0.0741428	Not significant	NO
LIMCH1	0.019	0.843058	0.0741428	Not significant	NO
MAP3K6	-0.006	0.843058	0.0741428	Not significant	NO
MAPK8	0.006	0.843058	0.0741428	Not significant	NO
MEIS3P1	-0.006	0.843058	0.0741428	Not significant	NO
MFSD6	-0.008	0.843058	0.0741428	Not significant	YES
MIER1	0.006	0.843058	0.0741428	Not significant	NO
MORF4L2	-0.004	0.843058	0.0741428	Not significant	NO
MPRIP	-0.004	0.843058	0.0741428	Not significant	YES
MRPL27	-0.005	0.843058	0.0741428	Not significant	NO
MTERFD3	-0.005	0.843058	0.0741428	Not significant	NO
NME2	-0.005	0.843058	0.0741428	Not significant	NO
NUP54	0.004	0.843058	0.0741428	Not significant	NO
OTX1	-0.019	0.843058	0.0741428	Not significant	NO
PGBD1	-0.007	0.843058	0.0741428	Not significant	NO
PIGP	-0.005	0.843058	0.0741428	Not significant	YES
POU4F1	-0.032	0.843058	0.0741428	Not significant	NO
PRR19	-0.012	0.843058	0.0741428	Not significant	YES
PSD2	-0.025	0.843058	0.0741428	Not significant	NO
PSMD4	-0.004	0.843058	0.0741428	Not significant	NO
PUF60	-0.005	0.843058	0.0741428	Not significant	NO
QARS	-0.004	0.843058	0.0741428	Not significant	NO
QPCTL	-0.008	0.843058	0.0741428	Not significant	NO
RAB6C	-0.005	0.843058	0.0741428	Not significant	NO
REEP5	-0.004	0.843058	0.0741428	Not significant	YES
RNF208	-0.014	0.843058	0.0741428	Not significant	NO
SEH1L	-0.004	0.843058	0.0741428	Not significant	NO
SGMS1	0.008	0.843058	0.0741428	Not significant	NO
SLC35E2	0.006	0.843058	0.0741428	Not significant	YES
SLC7A11	-0.024	0.843058	0.0741428	Not significant	YES
SLC9A9	0.011	0.843058	0.0741428	Not significant	NO
SMURF2	0.008	0.843058	0.0741428	Not significant	NO
SPRED2	0.004	0.843058	0.0741428	Not significant	NO
SRCIN1	-0.015	0.843058	0.0741428	Not significant	NO
SSBP1	-0.004	0.843058	0.0741428	Not significant	NO
TCF3	0.005	0.843058	0.0741428	Not significant	YES
TIMM16	-0.007	0.843058	0.0741428	Not significant	NO
TM7SF3	-0.006	0.843058	0.0741428	Not significant	NO
TMEM111	-0.004	0.843058	0.0741428	Not significant	NO
TMEM60	-0.004	0.843058	0.0741428	Not significant	NO
WDR34	-0.007	0.843058	0.0741428	Not significant	NO
WDR91	-0.007	0.843058	0.0741428	Not significant	YES
WDR93	-0.021	0.843058	0.0741428	Not significant	NO
YEATS2	-0.004	0.843058	0.0741428	Not significant	YES
ZNF532	-0.009	0.843058	0.0741428	Not significant	NO
RPIA	0.004	0.843142	0.0740991	Not significant	NO
SLC25A18	-0.012	0.843989	0.073663	Not significant	YES
CLEC4A	0.012	0.844296	0.0735052	Not significant	NO
STOX2	-0.021	0.844657	0.0733199	Not significant	YES
ALKBH5	-0.004	0.844912	0.0731884	Not significant	NO
ARRDC2	0.005	0.844912	0.0731884	Not significant	YES
B4GALT5	-0.005	0.844912	0.0731884	Not significant	NO
BLCAP	-0.004	0.844912	0.0731884	Not significant	NO
BTF3L4	0.004	0.844912	0.0731884	Not significant	NO
C1orf114	-0.029	0.844912	0.0731884	Not significant	NO
CCL13	-0.022	0.844912	0.0731884	Not significant	NO
CNDP2	-0.005	0.844912	0.0731884	Not significant	YES
CYC1	-0.005	0.844912	0.0731884	Not significant	NO
DBH	0.018	0.844912	0.0731884	Not significant	NO
EIF2C4	0.004	0.844912	0.0731884	Not significant	NO
FAM195A	-0.008	0.844912	0.0731884	Not significant	NO
FLJ42627	-0.009	0.844912	0.0731884	Not significant	NO
GALNT5	-0.03	0.844912	0.0731884	Not significant	NO
H2AFJ	-0.013	0.844912	0.0731884	Not significant	NO
HPS1	-0.006	0.844912	0.0731884	Not significant	YES
IMPDH1	-0.006	0.844912	0.0731884	Not significant	NO
MAN1A2	0.007	0.844912	0.0731884	Not significant	YES
MAOB	-0.027	0.844912	0.0731884	Not significant	NO
MARCH1	0.014	0.844912	0.0731884	Not significant	YES
NDUFAF1	-0.004	0.844912	0.0731884	Not significant	NO
P4HA1	-0.006	0.844912	0.0731884	Not significant	NO
PACSIN3	-0.007	0.844912	0.0731884	Not significant	NO
PC	-0.008	0.844912	0.0731884	Not significant	NO
PCBD1	-0.005	0.844912	0.0731884	Not significant	NO
PRELID2	-0.01	0.844912	0.0731884	Not significant	YES
S1PR2	0.006	0.844912	0.0731884	Not significant	NO
SCUBE2	-0.027	0.844912	0.0731884	Not significant	NO
SNRPF	-0.005	0.844912	0.0731884	Not significant	NO
SPAST	0.005	0.844912	0.0731884	Not significant	NO
SQSTM1	-0.007	0.844912	0.0731884	Not significant	YES
SURF1	-0.005	0.844912	0.0731884	Not significant	NO
TEX261	0.004	0.844912	0.0731884	Not significant	YES
ZDHHC18	0.004	0.844912	0.0731884	Not significant	YES
ZNF233	-0.012	0.844912	0.0731884	Not significant	NO
NAGLU	-0.007	0.845572	0.0728493	Not significant	NO
RSBN1	0.004	0.845572	0.0728493	Not significant	NO
SNRPC	-0.004	0.845579	0.0728459	Not significant	NO
CD28	0.014	0.845598	0.0728358	Not significant	YES
ZNF300	-0.012	0.845598	0.0728358	Not significant	YES
ASAH1	-0.008	0.84661	0.0723168	Not significant	NO
ATAD3C	0.013	0.84661	0.0723168	Not significant	YES
C20orf72	-0.004	0.84661	0.0723168	Not significant	NO
CACNA1C	0.016	0.84661	0.0723168	Not significant	YES
CCR6	0.02	0.84661	0.0723168	Not significant	NO
CHD1L	-0.004	0.84661	0.0723168	Not significant	NO
DYNLL1	-0.004	0.84661	0.0723168	Not significant	NO
EFTUD1	-0.004	0.84661	0.0723168	Not significant	NO
FAM124A	-0.012	0.84661	0.0723168	Not significant	NO
GLB1L	-0.012	0.84661	0.0723168	Not significant	NO
GNG11	-0.014	0.84661	0.0723168	Not significant	NO
GSTZ1	-0.008	0.84661	0.0723168	Not significant	NO
HSD17B8	-0.008	0.84661	0.0723168	Not significant	NO
MAP4K4	0.005	0.84661	0.0723168	Not significant	NO
MEF2C	0.008	0.84661	0.0723168	Not significant	NO
MRPS28	-0.004	0.84661	0.0723168	Not significant	NO
MRPS6	-0.008	0.84661	0.0723168	Not significant	NO
MSL3	0.004	0.84661	0.0723168	Not significant	NO
NDUFC2	-0.009	0.84661	0.0723168	Not significant	NO
NOM1	-0.004	0.84661	0.0723168	Not significant	NO
RANBP10	-0.006	0.84661	0.0723168	Not significant	NO
RHOBTB3	-0.01	0.84661	0.0723168	Not significant	NO
TBC1D12	0.005	0.84661	0.0723168	Not significant	NO
TPRN	-0.008	0.84661	0.0723168	Not significant	NO
TSFM	-0.006	0.84661	0.0723168	Not significant	NO
C17orf103	-0.006	0.846791	0.0722235	Not significant	NO
EGFL8	-0.02	0.846791	0.0722235	Not significant	NO
ERAL1	-0.004	0.846791	0.0722235	Not significant	NO
FARP1	-0.007	0.846791	0.0722235	Not significant	NO
HIST1H4J	-0.013	0.846791	0.0722235	Not significant	NO
LOC388152	-0.008	0.846791	0.0722235	Not significant	NO
MRPS16	-0.004	0.846791	0.0722235	Not significant	YES
PRMT2	-0.004	0.846791	0.0722235	Not significant	YES
SIRPB1	-0.008	0.846791	0.0722235	Not significant	NO
TMEM41A	-0.003	0.846791	0.0722235	Not significant	NO
TNRC6C	0.005	0.846791	0.0722235	Not significant	NO
VCL	0.005	0.846791	0.0722235	Not significant	YES
HSD3B7	-0.01	0.84789	0.0716603	Not significant	NO
MRPL51	-0.004	0.849297	0.0709406	Not significant	YES
SREBF2	-0.006	0.849297	0.0709406	Not significant	NO
NDUFB5	-0.004	0.849493	0.0708404	Not significant	NO
COL8A1	0.025	0.849521	0.0708259	Not significant	NO
CRTAP	-0.004	0.849521	0.0708259	Not significant	NO
PCDH1	0.009	0.849521	0.0708259	Not significant	YES
LYPLAL1	-0.005	0.850116	0.0705217	Not significant	NO
ACOT1	-0.006	0.850621	0.0702641	Not significant	NO
ATP8A2	-0.024	0.850621	0.0702641	Not significant	YES
ATP8B4	0.011	0.850621	0.0702641	Not significant	NO
BACE2	-0.008	0.850621	0.0702641	Not significant	NO
C10orf114	0.011	0.850621	0.0702641	Not significant	NO
C14orf174	-0.01	0.850621	0.0702641	Not significant	NO
C19orf25	-0.005	0.850621	0.0702641	Not significant	NO
C6orf136	-0.004	0.850621	0.0702641	Not significant	NO
C6orf154	-0.018	0.850621	0.0702641	Not significant	NO
DLL3	-0.025	0.850621	0.0702641	Not significant	NO
ECE2	-0.007	0.850621	0.0702641	Not significant	NO
HPS4	-0.006	0.850621	0.0702641	Not significant	YES
NCRNA00219	-0.009	0.850621	0.0702641	Not significant	NO
NDUFA1	-0.005	0.850621	0.0702641	Not significant	NO
NOP56	-0.004	0.850621	0.0702641	Not significant	NO
OVGP1	0.011	0.850621	0.0702641	Not significant	NO
PANX2	-0.022	0.850621	0.0702641	Not significant	YES
POU3F3	-0.03	0.850621	0.0702641	Not significant	NO
RNF187	-0.005	0.850621	0.0702641	Not significant	YES
SP4	0.007	0.850621	0.0702641	Not significant	YES
STRADB	-0.006	0.850621	0.0702641	Not significant	NO
TMPRSS5	-0.015	0.850621	0.0702641	Not significant	NO
TSGA14	-0.004	0.850621	0.0702641	Not significant	NO
UBXN8	-0.004	0.850621	0.0702641	Not significant	NO
UHRF1BP1	-0.005	0.850621	0.0702641	Not significant	NO
ANGPT1	-0.026	0.852081	0.0695189	Not significant	NO
BAG1	-0.004	0.852081	0.0695189	Not significant	YES
COL4A3BP	-0.005	0.852081	0.0695189	Not significant	NO
COX10	-0.004	0.852081	0.0695189	Not significant	YES
COX7A2	-0.005	0.852081	0.0695189	Not significant	NO
CSRP1	-0.007	0.852081	0.0695189	Not significant	YES
ENSA	-0.004	0.852081	0.0695189	Not significant	YES
LRTOMT	-0.005	0.852081	0.0695189	Not significant	YES
MGRN1	-0.004	0.852081	0.0695189	Not significant	YES
MRM1	-0.005	0.852081	0.0695189	Not significant	NO
NGFR	0.025	0.852081	0.0695189	Not significant	NO
SBDS	-0.004	0.852081	0.0695189	Not significant	NO
SIPA1	0.005	0.852081	0.0695189	Not significant	NO
STUB1	-0.005	0.852081	0.0695189	Not significant	NO
TMEM47	0.021	0.852081	0.0695189	Not significant	NO
AACS	-0.005	0.853419	0.0688376	Not significant	NO
APLN	-0.013	0.855474	0.0677933	Not significant	YES
BSG	-0.006	0.855474	0.0677933	Not significant	NO
IMMP1L	-0.004	0.855474	0.0677933	Not significant	NO
KIAA1543	-0.03	0.855474	0.0677933	Not significant	NO
LASS5	-0.003	0.855474	0.0677933	Not significant	NO
LSG1	-0.003	0.855474	0.0677933	Not significant	YES
MFSD3	-0.008	0.855474	0.0677933	Not significant	NO
NDEL1	-0.004	0.855474	0.0677933	Not significant	NO
PLEKHA1	0.005	0.855474	0.0677933	Not significant	NO
SKIV2L	-0.004	0.855603	0.0677279	Not significant	NO
TIMM8B	-0.004	0.855603	0.0677279	Not significant	NO
ZNHIT3	-0.003	0.855603	0.0677279	Not significant	NO
BICC1	0.015	0.855759	0.0676485	Not significant	NO
CDC42SE2	0.005	0.855759	0.0676485	Not significant	NO
CYB5B	-0.004	0.855759	0.0676485	Not significant	NO
ECD	-0.003	0.855759	0.0676485	Not significant	NO
LDHD	-0.016	0.855759	0.0676485	Not significant	NO
LONRF1	-0.007	0.855759	0.0676485	Not significant	NO
USP37	0.004	0.855759	0.0676485	Not significant	YES
PWP1	-0.003	0.856067	0.0674924	Not significant	NO
TCF7	0.012	0.856067	0.0674924	Not significant	YES
CHPF	-0.007	0.856769	0.067136	Not significant	NO
PLP1	-0.011	0.856912	0.0670637	Not significant	NO
TAF12	0.004	0.857138	0.0669493	Not significant	NO
TMEM87A	-0.004	0.857138	0.0669493	Not significant	NO
C5orf62	-0.014	0.857627	0.0667015	Not significant	NO
CYTH1	0.004	0.857656	0.0666867	Not significant	NO
FCN3	-0.015	0.857656	0.0666867	Not significant	NO
GFM2	-0.004	0.857656	0.0666867	Not significant	NO
LOC643837	0.004	0.857656	0.0666867	Not significant	NO
MLLT11	-0.014	0.857656	0.0666867	Not significant	NO
NDUFB10	-0.004	0.857656	0.0666867	Not significant	NO
NDUFS3	-0.004	0.857656	0.0666867	Not significant	NO
PCDHB2	-0.02	0.857656	0.0666867	Not significant	NO
SLC25A27	-0.014	0.857656	0.0666867	Not significant	NO
SLC37A4	-0.005	0.857656	0.0666867	Not significant	NO
TEKT3	-0.02	0.857656	0.0666867	Not significant	NO
TMEM44	-0.005	0.857656	0.0666867	Not significant	YES
UAP1	0.004	0.857656	0.0666867	Not significant	NO
ZMYND10	-0.016	0.857656	0.0666867	Not significant	NO
ZNF433	-0.007	0.857656	0.0666867	Not significant	NO
ATP5A1	-0.003	0.857763	0.0666328	Not significant	NO
COQ9	-0.004	0.857763	0.0666328	Not significant	NO
KIAA1161	-0.01	0.857763	0.0666328	Not significant	NO
LLPH	-0.003	0.857763	0.0666328	Not significant	NO
LTC4S	0.015	0.857763	0.0666328	Not significant	NO
PPP2R5E	0.004	0.857763	0.0666328	Not significant	YES
PRRG4	-0.017	0.857763	0.0666328	Not significant	YES
RASL10B	-0.02	0.857763	0.0666328	Not significant	NO
SRRM3	-0.015	0.857763	0.0666328	Not significant	YES
TEX264	-0.005	0.857763	0.0666328	Not significant	NO
TIMM50	-0.006	0.857763	0.0666328	Not significant	YES
ZC3H13	-0.008	0.857763	0.0666328	Not significant	NO
ACSS2	-0.006	0.858084	0.06647	Not significant	NO
PLA2G2A	-0.032	0.858084	0.06647	Not significant	NO
RUNX2	0.011	0.858084	0.06647	Not significant	NO
TCEA3	-0.015	0.858892	0.0660614	Not significant	NO
HMG20A	-0.005	0.858943	0.0660358	Not significant	YES
ITGB1BP1	-0.004	0.85929	0.0658605	Not significant	NO
LILRA3	-0.03	0.859311	0.0658495	Not significant	NO
TMEM8A	-0.006	0.859311	0.0658495	Not significant	NO
CRLF3	0.005	0.859608	0.0656997	Not significant	YES
FUCA2	-0.004	0.859608	0.0656997	Not significant	NO
NCOA1	0.004	0.859608	0.0656997	Not significant	YES
QRICH2	0.01	0.859608	0.0656997	Not significant	NO
SIGMAR1	-0.005	0.859608	0.0656997	Not significant	NO
SOBP	-0.013	0.859608	0.0656997	Not significant	NO
TBC1D14	-0.004	0.859608	0.0656997	Not significant	NO
TRIO	0.006	0.859608	0.0656997	Not significant	NO
ADAL	-0.004	0.859736	0.0656347	Not significant	YES
ARID1A	0.003	0.859736	0.0656347	Not significant	NO
B3GALTL	-0.005	0.859736	0.0656347	Not significant	YES
C21orf57	-0.005	0.859736	0.0656347	Not significant	NO
CENPA	0.006	0.859736	0.0656347	Not significant	NO
CHCHD4	-0.003	0.859736	0.0656347	Not significant	NO
CHD2	0.003	0.859736	0.0656347	Not significant	NO
COLEC12	-0.012	0.859736	0.0656347	Not significant	NO
COMMD5	-0.004	0.859736	0.0656347	Not significant	YES
CTSF	-0.008	0.859736	0.0656347	Not significant	NO
FOXD3	0.01	0.859736	0.0656347	Not significant	NO
FOXN3	0.005	0.859736	0.0656347	Not significant	NO
HIST1H2AE	-0.023	0.859736	0.0656347	Not significant	YES
INO80C	-0.004	0.859736	0.0656347	Not significant	NO
KATNB1	-0.004	0.859736	0.0656347	Not significant	NO
MAL2	-0.035	0.859736	0.0656347	Not significant	NO
MRPL45	-0.003	0.859736	0.0656347	Not significant	YES
NEURL2	-0.006	0.859736	0.0656347	Not significant	NO
PLEKHG1	0.009	0.859736	0.0656347	Not significant	NO
PRKCA	0.01	0.859736	0.0656347	Not significant	NO
PTTG3P	-0.012	0.859736	0.0656347	Not significant	NO
S100PBP	0.003	0.859736	0.0656347	Not significant	YES
SCAMP3	-0.005	0.859736	0.0656347	Not significant	NO
SFTA1P	-0.029	0.859736	0.0656347	Not significant	NO
SSH3	-0.006	0.859736	0.0656347	Not significant	YES
STEAP2	-0.017	0.859736	0.0656347	Not significant	NO
STIL	0.005	0.859736	0.0656347	Not significant	NO
STK24	-0.004	0.859736	0.0656347	Not significant	YES
TBC1D8B	-0.009	0.859736	0.0656347	Not significant	NO
TIGD6	-0.004	0.859736	0.0656347	Not significant	NO
TMEM199	-0.003	0.859736	0.0656347	Not significant	YES
TOMM20	-0.004	0.859736	0.0656347	Not significant	NO
ZNF146	0.004	0.859736	0.0656347	Not significant	YES
ZNF48	-0.004	0.859736	0.0656347	Not significant	NO
AHCY	-0.005	0.860608	0.0651946	Not significant	NO
DENND4A	0.005	0.860608	0.0651946	Not significant	NO
FUNDC1	-0.003	0.860608	0.0651946	Not significant	NO
GABARAPL2	-0.003	0.860608	0.0651946	Not significant	NO
HEXA	-0.005	0.860608	0.0651946	Not significant	YES
HPS5	-0.007	0.860608	0.0651946	Not significant	NO
HSP90B1	-0.004	0.860608	0.0651946	Not significant	NO
KIF17	-0.023	0.860608	0.0651946	Not significant	NO
LTK	-0.022	0.860608	0.0651946	Not significant	NO
MAP1B	0.012	0.860608	0.0651946	Not significant	NO
PDE4C	-0.024	0.860608	0.0651946	Not significant	NO
PLAT	0.011	0.860608	0.0651946	Not significant	NO
RNF5P1	-0.005	0.860608	0.0651946	Not significant	NO
RPUSD3	-0.005	0.860608	0.0651946	Not significant	NO
SLC26A2	-0.011	0.860608	0.0651946	Not significant	YES
SPG20	-0.004	0.860608	0.0651946	Not significant	NO
TMEM62	-0.004	0.860608	0.0651946	Not significant	NO
TXN2	-0.004	0.860608	0.0651946	Not significant	NO
VASH2	0.018	0.860608	0.0651946	Not significant	NO
ZNF2	0.003	0.860608	0.0651946	Not significant	NO
ZWILCH	0.004	0.860608	0.0651946	Not significant	NO
ABHD12	-0.005	0.861807	0.0645897	Not significant	NO
NALCN	-0.031	0.861807	0.0645897	Not significant	NO
TTC7B	-0.004	0.861807	0.0645897	Not significant	NO
UQCRC1	-0.005	0.861807	0.0645897	Not significant	NO
EPS8L2	-0.02	0.863905	0.0635338	Not significant	NO
MRPS21	-0.004	0.863905	0.0635338	Not significant	NO
SNHG11	-0.004	0.863905	0.0635338	Not significant	NO
TXNDC11	-0.003	0.863905	0.0635338	Not significant	NO
MDM2	-0.008	0.864018	0.0634773	Not significant	NO
VEPH1	-0.021	0.864756	0.0631065	Not significant	NO
LAMA5	-0.01	0.865343	0.0628119	Not significant	NO
OR2A7	-0.018	0.865343	0.0628119	Not significant	NO
FOXJ3	0.003	0.865397	0.0627849	Not significant	NO
RAB24	-0.004	0.865966	0.0624989	Not significant	NO
CLN6	-0.006	0.866955	0.0620036	Not significant	NO
CYB561D2	-0.004	0.866955	0.0620036	Not significant	NO
FBXO32	-0.007	0.866955	0.0620036	Not significant	YES
HSP90AB1	-0.004	0.866955	0.0620036	Not significant	NO
RPL19	-0.004	0.866955	0.0620036	Not significant	NO
SLC3A2	-0.006	0.866955	0.0620036	Not significant	NO
CAND2	-0.013	0.867171	0.0618952	Not significant	NO
ARHGEF5	-0.017	0.867221	0.0618703	Not significant	NO
C11orf52	-0.025	0.867221	0.0618703	Not significant	NO
CCNJL	-0.012	0.867221	0.0618703	Not significant	YES
EFS	-0.021	0.867221	0.0618703	Not significant	NO
FLJ44635	-0.011	0.867221	0.0618703	Not significant	NO
IPCEF1	0.015	0.867221	0.0618703	Not significant	YES
KCNK15	-0.017	0.867221	0.0618703	Not significant	YES
LOC100130776	-0.008	0.867221	0.0618703	Not significant	NO
NDRG1	-0.013	0.867221	0.0618703	Not significant	NO
PPIAL4D	-0.021	0.867221	0.0618703	Not significant	NO
PYCRL	-0.006	0.867221	0.0618703	Not significant	YES
RHOC	0.004	0.867221	0.0618703	Not significant	YES
SPAG7	-0.004	0.867221	0.0618703	Not significant	NO
SYNE1	0.005	0.867221	0.0618703	Not significant	NO
TMEM164	-0.004	0.867221	0.0618703	Not significant	NO
TMEM57	0.003	0.867221	0.0618703	Not significant	NO
USP1	0.005	0.867221	0.0618703	Not significant	YES
ZMYM1	0.005	0.867221	0.0618703	Not significant	YES
ZNF267	0.005	0.867221	0.0618703	Not significant	NO
SPAG4	-0.012	0.867481	0.06174	Not significant	NO
DOCK11	0.009	0.867806	0.0615774	Not significant	YES
HMGXB3	-0.004	0.867806	0.0615774	Not significant	NO
PARN	-0.003	0.867806	0.0615774	Not significant	NO
PPP2R5C	0.003	0.867806	0.0615774	Not significant	NO
PXN	-0.004	0.867806	0.0615774	Not significant	NO
SHF	-0.01	0.867806	0.0615774	Not significant	NO
SLC38A7	-0.004	0.867806	0.0615774	Not significant	NO
BEGAIN	-0.018	0.869325	0.060818	Not significant	NO
[truncated: 12,481 more rows]

## Sheet: n.85G>A_MIR142_DE_genes
gene_ID	log2(FC)	adj_p-value	-log10(adj_p-value)	change_direction	predicted_target_mir-142-3p_0|n
[truncated: 14,477 more rows]

[truncated: 2 more sheets: n.21_22delTA_MIR10B_DE_genes, n.-6C>G_MIR21_DE_genes]
