# Supplementary material for: miRNA gene mutations commonly disrupt the proper functioning of miRNA genes
Source: Research Square preprint supplement (doi:10.21203/rs.3.rs-7029847/v1), 2025-07-21
Supplement: Supplementary file 7 [file 92954547a191abfddca770b5.xlsx]

## Sheet: Supplementary Table S7
sample_ID	cancer	miRNA_gene	miRBase_ID	chromosome	miRNA_gene_orientation	miRNA_strand_balance	mutation_position	mutation_ID_COSMIC	mutation_subregion	pos_mut_mature_miRNA	pos_mut_loop	pos_mut_flank	reference_allele	alternative_allele	reads+1_miRNA_5p_strand	reads+1_miRNA_3p_strand	balance_mut_miRNA_(5p+1/3p+1)	log2_balance_mut_miRNA	balance_wt_miRNA_(5p+1/3p+1)	log2_balance_wt_miRNA	one_sample_t-test_p -value	Bonferroni_corrected_one_sample_t-test_p-value	z-score	z-score_p-value	-log10(p-value)z-score	mut_fraction_5p_[%]	mut_fraction_3p_[%]	wt_fraction_5p_[%]	wt_fraction_3p_[%]	change_in_strand_fractions_[%]	outlier
TCGA-XU-A930-01A-11R-A42W-13	THYM	MIR205	hsa-mir-205	chr1	+	5p	209432227	NA	flanking-3	NA	NA	4	A	AGG	313852	164188	1.91154	0.934736	2003.43	10.8193	2.03157e-144	1.04626e-141	-14.6446	2.66767e-300	299.574	65.6539	34.3461	99.9501	0.0498896	34.2962	YES
TCGA-EE-A2MR-06A-11R-A18V-13	SKCM	MIR365B	hsa-mir-365b	chr17	+	3p	31575494	COSN5027839	non-seed duplex_3p	17	NA	NA	C	T	51	219	0.232877	-2.10236	0.0353059	-5.22493	5.2374e-199	2.69726e-196	2.65751	0.007872	2.10392	18.8889	81.1111	3.41019	96.5898	15.4787	YES
TCGA-LN-A9FP-01A-31R-A38E-13	ESCA	MIR409	hsa-mir-409	chr14	+	both	101065302	NA	flanking-5	NA	NA	-12	G	T	32	345	0.0927536	-3.43045	0.436216	-1.32504	4.45664e-76	2.29517e-73	-3.38891	0.0007017	3.15385	8.48806	91.5119	30.3726	69.6274	21.8845	YES
TCGA-BT-A0YX-01A-11R-A10V-13	BLCA	MIR520A	hsa-mir-520a	chr19	+	both	53690923	COSN2376740	loop	NA	8	NA	G	C	61	21	2.90476	1.53842	0.66528	-0.731209	2.79919e-30	1.44158e-27	3.46599	0.000528282	3.27713	74.3902	25.6098	39.95	60.05	34.4402	YES
TCGA-BG-A0VZ-01A-11R-A108-13	UCEC	MIR100	hsa-mir-100	chr11	-	5p	122152265	COSN2381375	loop	NA	10	NA	G	T	1997	1	1997	10.9636	11900.1	12.825	1.35687e-110	6.9879e-108	-1.22769	0.219562	0.658442	99.9499	0.0500501	99.9916	0.00840256	0.0416475	NO
TCGA-13-0904-01A-02R-1564-13	OV	MIR100	hsa-mir-100	chr11	-	5p	122152219	NA	flanking-3	NA	NA	21	C	T	59867	1	59867	15.8695	26096.2	13.7489	4.09186e-98	2.10731e-95	1.19681	0.231379	0.635676	99.9983	0.00167034	99.9962	0.00383183	0.00216149	NO
TCGA-EJ-7781-01A-11R-2117-13	PRAD	MIR100	hsa-mir-100	chr11	-	5p	122152219	NA	flanking-3	NA	NA	21	C	T	44180	2	22090	14.4311	32691.4	14.6992	9.59244e-10	4.94011e-07	-0.279742	0.779675	0.108086	99.9955	0.00452673	99.9969	0.00305881	0.00146792	NO
TCGA-G4-6628-01A-11H-1838-13	COAD	MIR100	hsa-mir-100	chr11	-	5p	122152215	NA	flanking-3	NA	NA	25	G	T	10687	2	5343.5	12.3836	7938.4	12.2542	0.0624783	1	0.0874524	0.930312	0.0313714	99.9813	0.0187108	99.9874	0.0125954	0.00611542	NO
TCGA-D1-A16Y-01A-31R-A12H-13	UCEC	MIR100	hsa-mir-100	chr11	-	5p	122152232	NA	flanking-3	NA	NA	8	A	G	20457	3	6819	12.7353	11900.1	12.825	0.168268	1	-0.0591512	0.952832	0.0209838	99.9853	0.0146628	99.9916	0.00840256	0.0062602	NO
TCGA-AX-A1CA-01A-12R-A136-13	UCEC	MIR10397	hsa-mir-10397	chr5	+	both	10402401	NA	loop	NA	16	NA	G	T	176	2	88	6.45943	87.2017	6.07334	2.00135e-11	1.03069e-08	0.371725	0.710098	0.148682	98.8764	1.1236	98.8662	1.13377	0.0101698	NO
TCGA-B5-A0JS-01A-11R-A103-13	UCEC	MIR106A	hsa-mir-106a	chrX	-	5p	134170270	COSN2383038	flanking-5	NA	NA	-4	T	G	323	12	26.9167	4.75043	83.3948	6.01762	2.10227e-94	1.08267e-91	-1.22985	0.218752	0.660047	96.4179	3.58209	98.8151	1.18491	2.39718	NO
TCGA-05-4244-01A-01T-1108-13	LUAD	MIR106A	hsa-mir-106a	chrX	-	5p	134170287	NA	flanking-5	NA	NA	-21	T	C	125	1	125	6.96578	87.3374	6.18797	6.21978e-37	3.20319e-34	0.887919	0.374584	0.42645	99.2063	0.793651	98.868	1.13202	0.338373	NO
TCGA-44-A4SU-01A-11H-A24S-13	LUAD	MIR106A	hsa-mir-106a	chrX	-	5p	134170272	NA	flanking-5	NA	NA	-6	G	A	197	4	49.25	5.62205	87.3374	6.18797	7.89984e-23	4.06842e-20	-0.646035	0.518256	0.285455	98.01	1.99005	98.868	1.13202	0.858026	NO
TCGA-Y8-A896-01A-11R-A36A-13	KIRP	MIR106A	hsa-mir-106a	chrX	-	5p	134170284	NA	flanking-5	NA	NA	-18	T	A	79	1	79	6.30378	74.9582	5.98804	1.02637e-06	0.000528581	0.373941	0.708448	0.149692	98.75	1.25	98.6835	1.31651	0.0665137	NO
TCGA-39-5019-01A-01T-1819-13	LUSC	MIR106B	hsa-mir-106b	chr7	-	5p	100094036	COSN493976	loop	NA	7	NA	G	A	3344	9935	0.336588	-1.57095	0.814171	-0.575232	6.26659e-87	3.22729e-84	-1.12729	0.259621	0.585661	25.1826	74.8174	44.8784	55.1216	19.6958	NO
TCGA-DX-A48J-01A-21R-A30J-13	SARC	MIR106B	hsa-mir-106b	chr7	-	5p	100093982	NA	flanking-3	NA	NA	20	G	A	200	515	0.38835	-1.36457	0.707437	-0.679642	6.15277e-39	3.16868e-36	-0.958937	0.337591	0.47161	27.972	72.028	41.4327	58.5673	13.4606	NO
TCGA-LN-A49L-01A-11R-A24L-13	ESCA	MIR106B	hsa-mir-106b	chr7	-	5p	100094029	NA	loop	NA	14	NA	C	T	986	1127	0.874889	-0.192828	1.04455	-0.0276415	1.2846e-05	0.00661571	-0.32876	0.742337	0.129399	46.6635	53.3365	51.0895	48.9105	4.42599	NO
TCGA-EB-A4IS-01A-21R-A25Z-13	SKCM	MIR106B	hsa-mir-106b	chr7	-	5p	100093979	NA	flanking-3	NA	NA	23	G	A	849	4057	0.209268	-2.25658	0.217557	-2.48641	4.01038e-07	0.000206535	0.242805	0.808157	0.0925044	17.3053	82.6947	17.8683	82.1317	0.562996	NO
TCGA-VQ-AA64-01A-11R-A415-13	STAD	MIR106B	hsa-mir-106b	chr7	-	5p	100094069	NA	flanking-5	NA	NA	-6	G	A	1623	2134	0.760544	-0.394897	0.901395	-0.294598	0.00173423	0.893129	-0.149566	0.881107	0.0549713	43.1994	56.8006	47.407	52.593	4.20768	NO
TCGA-VQ-A924-01A-11R-A415-13	STAD	MIR106B	hsa-mir-106b	chr7	-	5p	100094026	NA	loop	NA	17	NA	G	A	822	984	0.835366	-0.25952	0.901395	-0.294598	0.270962	1	0.0523093	0.958282	0.0185066	45.515	54.485	47.407	52.593	1.89209	NO
TCGA-51-4080-01A-01T-1557-13	LUSC	MIR10A	hsa-mir-10a	chr17	-	5p	48579940	NA	flanking-5	NA	NA	-14	G	C	76103	6	12683.8	13.6307	9639.61	13.0529	7.08312e-53	3.64781e-50	0.797015	0.425442	0.37116	99.9921	0.00788343	99.9896	0.0103728	0.00248936	NO
TCGA-A6-6653-01A-11H-1773-13	COAD	MIR10B	hsa-mir-10b	chr2	+	5p	176150322	NA	flanking-5	NA	NA	-7	CTA	C	405818	559	725.971	9.50377	3509.66	11.6153	1.35429e-242	6.97457e-240	-3.23111	0.00123311	2.909	99.8624	0.137557	99.9715	0.0284847	0.109072	NO
TCGA-70-6723-01A-11H-1819-13	LUSC	MIR10B	hsa-mir-10b	chr2	+	5p	176150376	COSN2378653	non-seed duplex_3p	9	NA	NA	G	A	148792	30	4959.73	12.276	2676.16	11.1879	7.92357e-122	4.08064e-119	1.47668	0.139761	0.854613	99.9798	0.0201583	99.9626	0.0373531	0.0171947	NO
TCGA-YG-AA3N-01A-11R-A38N-13	SKCM	MIR10B	hsa-mir-10b	chr2	+	5p	176150359	COSN1082676	loop	NA	8	NA	C	T	29197	33	884.758	9.78914	2344.17	10.9441	5.88866e-106	3.03266e-103	-1.38033	0.167487	0.77602	99.8871	0.112898	99.9574	0.0426408	0.0702569	NO
TCGA-A6-2674-01A-02T-0822-13_GRCh37-lite	COAD	MIR10B	hsa-mir-10b	chr2	+	5p	176150360	NA	loop	NA	9	NA	G	A	51150	9	5683.33	12.4725	3509.66	11.6153	7.43929e-101	3.83123e-98	1.31166	0.189636	0.722079	99.9824	0.0175922	99.9715	0.0284847	0.0108925	NO
TCGA-D1-A3DH-01A-11R-A19V-13	UCEC	MIR10B	hsa-mir-10b	chr2	+	5p	176150317	NA	flanking-5	NA	NA	-12	G	A	503949	95	5304.73	12.3731	3956.75	11.7448	8.49785e-59	4.37639e-56	0.78606	0.431833	0.364685	99.9812	0.0188476	99.9747	0.0252669	0.00641932	NO
TCGA-A5-A0GP-01A-11R-A041-13	UCEC	MIR10B	hsa-mir-10b	chr2	+	5p	176150342	COSN1082679	non-seed duplex_5p	14	NA	NA	C	T	247128	59	4188.61	12.0323	3961.82	11.7466	6.376e-16	3.28364e-13	0.357368	0.720816	0.142175	99.9761	0.0238686	99.9748	0.0252346	0.00136599	NO
TCGA-L7-A6VZ-01A-12R-A337-13	ESCA	MIR10B	hsa-mir-10b	chr2	+	5p	176150413	NA	flanking-3	NA	NA	24	C	T	57558	26	2213.77	11.1123	2809.9	11.2608	0.00852886	1	-0.194954	0.845429	0.0729228	99.9548	0.0451514	99.9644	0.0355758	0.00957568	NO
TCGA-HF-A5NB-01A-11R-A31Q-13	STAD	MIR10B	hsa-mir-10b	chr2	+	5p	176150413	NA	flanking-3	NA	NA	24	C	T	14944	6	2490.67	11.2823	2692.59	11.1747	0.00478102	1	0.134427	0.893065	0.0491168	99.9599	0.0401338	99.9629	0.0371251	0.00300866	NO
TCGA-BC-A112-01A-11R-A130-13	LIHC	MIR122	hsa-mir-122	chr18	+	5p	58451077	NA	flanking-5	NA	NA	-11	TAGC	T	653	10	65.3	6.02901	163.803	7.25289	3.08837e-147	1.59051e-144	-2.25327	0.0242423	1.61543	98.4917	1.5083	99.3932	0.606787	0.901509	NO
TCGA-CC-A7IF-01A-11R-A33A-13	LIHC	MIR122	hsa-mir-122	chr18	+	5p	58451084	COSN16303070	flanking-5	NA	NA	-4	G	A	132179	1110	119.08	6.89579	163.802	7.25288	8.84468e-31	4.55501e-28	-0.657443	0.510896	0.291667	99.1672	0.832777	99.3932	0.60679	0.225987	NO
TCGA-BF-A3DM-01A-11R-A20E-13	SKCM	MIR1226	hsa-mir-1226	chr3	+	3p	47849594	NA	loop	NA	14	NA	C	T	1	76	0.0131579	-6.24793	0.0146749	-6.35294	0.0986357	1	0.116162	0.907524	0.0421417	1.2987	98.7013	1.44627	98.5537	0.147566	NO
TCGA-BR-4370-01A-01R-1157-13	STAD	MIR1247	hsa-mir-1247	chr14	-	5p	101560306	NA	flanking-3	NA	NA	20	G	A	14	148	0.0945946	-3.4021	0.466656	-1.49161	6.83285e-65	3.51892e-62	-1.77682	0.0755972	1.12149	8.64198	91.358	31.8177	68.1823	23.1757	NO
TCGA-93-8067-01A-11H-2286-13	LUAD	MIR1247	hsa-mir-1247	chr14	-	5p	101560306	NA	flanking-3	NA	NA	20	G	A	16	83	0.192771	-2.37504	0.536715	-1.26376	1.21602e-43	6.2625e-41	-1.00919	0.312881	0.504621	16.1616	83.8384	34.9261	65.0739	18.7645	NO
TCGA-B5-A0K6-01A-11R-A041-13	UCEC	MIR125A	hsa-mir-125a	chr19	+	5p	51693267	COSN2382193	flanking-5	NA	NA	-1	G	T	1399	25	55.96	5.80632	139.852	6.7428	3.65447e-69	1.88205e-66	-0.876268	0.380884	0.419207	98.2444	1.75562	99.29	0.709967	1.04565	NO
TCGA-BS-A0U8-01A-11R-A103-13	UCEC	MIR125A	hsa-mir-125a	chr19	+	5p	51693309	COSN2382192	seed_3p	4	NA	NA	G	T	389	2	194.5	7.60363	139.376	6.73191	9.1652e-62	4.72008e-59	0.812714	0.416382	0.380508	99.4885	0.511509	99.2876	0.712371	0.200862	NO
TCGA-UU-A93S-01A-21R-A41G-13	BRCA	MIR125A	hsa-mir-125a	chr19	+	5p	51693330	NA	flanking-3	NA	NA	3	G	T	5342	49	109.02	6.76845	211.411	7.37001	2.70756e-73	1.3944e-70	-0.588918	0.555916	0.254991	99.0911	0.908922	99.5292	0.470785	0.438137	NO
TCGA-V3-A9ZX-01A-11R-A40B-13	UVM	MIR125A	hsa-mir-125a	chr19	+	5p	51693260	NA	flanking-5	NA	NA	-8	T	A	11947	26	459.5	8.84392	579.421	8.98264	0.0696046	1	-0.206992	0.836016	0.0777852	99.7828	0.217155	99.8277	0.172289	0.0448665	NO
TCGA-66-2789-01A-01T-0981-13	LUSC	MIR126	hsa-mir-126	chr9	+	both	136670610	COSN494120	flanking-5	NA	NA	-6	A	T	748	11709	0.0638825	-3.96844	0.0854021	-3.6366	9.10617e-39	4.68968e-36	-0.654745	0.512632	0.290194	6.00466	93.9953	7.86825	92.1318	1.86359	NO
TCGA-N5-A59E-01A-11R-A28Z-13	UCS	MIR126	hsa-mir-126	chr9	+	both	136670683	NA	flanking-3	NA	NA	9	G	C	450	9653	0.0466176	-4.42298	0.0547113	-4.22815	5.42497e-05	0.0279386	-0.584919	0.558602	0.252898	4.45412	95.5459	5.18732	94.8127	0.733198	NO
TCGA-CQ-A4C7-01A-11R-A25B-13	HNSC	MIR126	hsa-mir-126	chr9	+	both	136670698	NA	flanking-3	NA	NA	24	A	G	1461	16205	0.0901574	-3.47141	0.0962572	-3.5159	0.10769	1	0.0703956	0.943879	0.0250838	8.27012	91.7299	8.78053	91.2195	0.510411	NO
TCGA-EB-A3Y7-01A-11R-A23A-13	SKCM	MIR127	hsa-mir-127	chr14	+	3p	100883033	COSM3493808	loop	NA	11	NA	C	T	43	1539	0.0279402	-5.16151	0.0978777	-3.57367	8.05863e-154	4.15019e-151	-1.95338	0.0507749	1.29435	2.71808	97.2819	8.91518	91.0848	6.1971	NO
TCGA-05-4397-01A-01T-1207-13	LUAD	MIR127	hsa-mir-127	chr14	+	3p	100883038	COSM6075319	seed_3p	4	NA	NA	G	T	210	310	0.677419	-0.561879	0.276411	-2.12385	1.93471e-160	9.96377e-158	1.75178	0.0798115	1.09793	40.3846	59.6154	21.6553	78.3447	18.7293	NO
TCGA-FD-A3SM-01A-11R-A22V-13	BLCA	MIR127	hsa-mir-127	chr14	+	3p	100883075	NA	flanking-3	NA	NA	19	C	G	1261	4844	0.260322	-1.94163	0.222409	-2.33554	2.80325e-26	1.44367e-23	0.55767	0.57707	0.238771	20.6552	79.3448	18.1943	81.8057	2.46091	NO
TCGA-EE-A29M-06A-11R-A18W-13	SKCM	MIR127	hsa-mir-127	chr14	+	3p	100883030	COSM3493807	loop	NA	8	NA	G	A	40	643	0.0622084	-4.00675	0.0978783	-3.57367	5.80078e-26	2.9874e-23	-0.53278	0.594186	0.226078	5.85652	94.1435	8.91522	91.0848	3.05871	NO
TCGA-E2-A10C-01A-21R-A10I-13	BRCA	MIR127	hsa-mir-127	chr14	+	3p	100883069	NA	flanking-3	NA	NA	13	C	T	661	1399	0.47248	-1.08167	0.397954	-1.60584	3.11731e-59	1.60541e-56	0.520308	0.602849	0.219791	32.0874	67.9126	28.4669	71.5331	3.62048	NO
TCGA-EE-A2M5-06A-12R-A18V-13	SKCM	MIR127	hsa-mir-127	chr14	+	3p	100883041	COSM3493809	seed_3p	7	NA	NA	C	T	261	3882	0.0672334	-3.89468	0.097849	-3.57408	1.09513e-15	5.63993e-13	-0.394386	0.693296	0.159081	6.29978	93.7002	8.91279	91.0872	2.61301	NO
TCGA-CG-4437-01A-01R-1802-13	STAD	MIR1301	hsa-mir-1301	chr2	-	3p	25328726	NA	flanking-5	NA	NA	-19	T	C	4	96	0.0416667	-4.58496	0.045374	-4.88147	0.00365897	1	0.273035	0.784826	0.105227	4	96	4.34046	95.6595	0.34046	NO
TCGA-EB-A431-01A-11R-A25Z-13	SKCM	MIR1306	hsa-mir-1306	chr22	+	both	20086146	NA	flanking-3	NA	NA	17	C	T	113	14	8.07143	3.01282	4.21409	1.91104	1.07775e-108	5.55039e-106	1.58277	0.113474	0.945103	88.9764	11.0236	80.8212	19.1788	8.15519	NO
TCGA-D1-A0ZS-01A-11R-A119-13	UCEC	MIR1307	hsa-mir-1307	chr10	-	both	103394290	NA	flanking-3	NA	NA	11	C	T	219	4710	0.0464968	-4.42672	0.436063	-1.58888	8.75963e-236	4.51121e-233	-2.49822	0.0124819	1.90372	4.44309	95.5569	30.3652	69.6348	25.9221	NO
TCGA-LP-A7HU-01A-11R-A342-13	CESC	MIR1307	hsa-mir-1307	chr10	-	both	103394297	COSN16128613	flanking-3	NA	NA	4	C	T	3344	4205	0.795244	-0.330531	0.262192	-2.19998	1.34462e-107	6.92477e-105	1.96484	0.0494331	1.30598	44.2973	55.7027	20.7728	79.2272	23.5245	NO
TCGA-ZN-A9VQ-01A-11R-A404-13	MESO	MIR1307	hsa-mir-1307	chr10	-	both	103394332	NA	loop	NA	9	NA	A	G	1887	12272	0.153765	-2.7012	0.242919	-2.30907	0.000102255	0.0526615	-0.439644	0.660195	0.180328	13.3272	86.6728	19.5442	80.4558	6.21699	NO
TCGA-D1-A16Y-01A-31R-A12H-13	UCEC	MIR1307	hsa-mir-1307	chr10	-	both	103394308	COSN1079925	non-seed duplex_3p	15	NA	NA	G	A	2877	6617	0.434789	-1.20161	0.435736	-1.58984	9.22621e-15	4.7515e-12	0.341823	0.732484	0.135202	30.3033	69.6967	30.3493	69.6507	0.0459702	NO
TCGA-BG-A0YV-01A-11R-A10I-13	UCEC	MIR130A	hsa-mir-130a	chr11	+	3p	57641279	COSN2381402	flanking-3	NA	NA	6	G	A	8	842	0.00950119	-6.71768	0.015948	-6.18193	2.99118e-46	1.54046e-43	-0.683096	0.494546	0.305793	0.941176	99.0588	1.56976	98.4302	0.628585	NO
TCGA-AX-A2HJ-01A-11R-A17A-13	UCEC	MIR130A	hsa-mir-130a	chr11	+	3p	57641278	NA	flanking-3	NA	NA	5	C	T	24	1207	0.019884	-5.65225	0.015948	-6.18193	2.03804e-45	1.04959e-42	0.675377	0.499436	0.30152	1.94963	98.0504	1.56976	98.4302	0.379873	NO
TCGA-QG-A5Z1-01A-11H-A28I-13	COAD	MIR130B	hsa-mir-130b	chr22	+	3p	21653344	NA	loop	NA	8	NA	C	T	68	151	0.450331	-1.15094	0.473741	-1.32883	3.62811e-05	0.0186848	0.210753	0.83308	0.0793133	31.0502	68.9498	32.1455	67.8545	1.09526	NO
TCGA-DX-A6BE-01A-41R-A32L-13	SARC	MIR130B	hsa-mir-130b	chr22	+	3p	21653390	NA	flanking-3	NA	NA	15	C	T	39	56	0.696429	-0.521953	0.692733	-0.682261	0.0029124	1	0.198863	0.84237	0.0744973	41.0526	58.9474	40.9239	59.0761	0.128705	NO
TCGA-56-A4BX-01A-11H-A24G-13	LUSC	MIR134	hsa-mir-134	chr14	+	5p	101054689	NA	flanking-5	NA	NA	-5	G	T	156	2	78	6.2854	308.643	7.95606	5.34126e-160	2.75075e-157	-1.90105	0.0572951	1.24188	98.7342	1.26582	99.677	0.322952	0.942871	NO
TCGA-93-7348-01A-21H-2038-13	LUAD	MIR134	hsa-mir-134	chr14	+	5p	101054684	NA	flanking-5	NA	NA	-10	G	A	11155	15	743.667	9.53851	291.535	7.75902	7.20652e-157	3.71136e-154	1.72132	0.0851924	1.0696	99.8657	0.134288	99.6582	0.341839	0.207551	NO
TCGA-D3-A8GC-06A-11R-A37G-13	SKCM	MIR134	hsa-mir-134	chr14	+	5p	101054683	NA	flanking-5	NA	NA	-11	C	T	81	1	81	6.33985	383.477	8.1831	1.78149e-131	9.1747e-129	-1.71477	0.0863868	1.06355	98.7805	1.21951	99.7399	0.260093	0.959419	NO
TCGA-FS-A1ZZ-06A-11R-A18V-13	SKCM	MIR134	hsa-mir-134	chr14	+	5p	101054686	NA	flanking-5	NA	NA	-8	C	T	163	2	81.5	6.34873	383.477	8.1831	8.51077e-131	4.38305e-128	-1.70651	0.0879125	1.05595	98.7879	1.21212	99.7399	0.260093	0.952028	NO
TCGA-KQ-A41R-01A-21R-A358-13	BLCA	MIR134	hsa-mir-134	chr14	+	5p	101054719	NA	loop	NA	4	NA	G	A	403	1	403	8.65464	372.624	8.18689	2.14797e-20	1.1062e-17	0.478514	0.632285	0.199087	99.7525	0.247525	99.7324	0.267649	0.0201242	NO
TCGA-BS-A0TJ-01A-11R-A103-13	UCEC	MIR134	hsa-mir-134	chr14	+	5p	101054749	COSN2381582	non-seed duplex_3p	18	NA	NA	C	A	817	3	272.333	8.08923	251.07	7.66997	1.57416e-24	8.10693e-22	0.462341	0.643836	0.191224	99.6341	0.365854	99.6033	0.396715	0.030861	NO
TCGA-BA-6871-01A-11R-1872-13	HNSC	MIR134	hsa-mir-134	chr14	+	5p	101054677	NA	flanking-5	NA	NA	-17	C	G	2565	5	513	9.00282	478.692	8.60822	8.08445e-21	4.16349e-18	0.42722	0.669219	0.174432	99.8054	0.194553	99.7915	0.208467	0.0139146	NO
TCGA-22-4613-01A-01T-1442-13	LUSC	MIR134	hsa-mir-134	chr14	+	5p	101054684	NA	flanking-5	NA	NA	-10	G	A	232	1	232	7.85798	308.643	7.95606	0.0152653	1	-0.111601	0.91114	0.040415	99.5708	0.429185	99.677	0.322952	0.106232	NO
TCGA-22-5483-01A-01T-1819-13	LUSC	MIR135B	hsa-mir-135b	chr1	-	5p	205448386	NA	flanking-5	NA	NA	-3	C	T	72	9	8	3	33.0883	4.66679	2.62939e-97	1.35414e-94	-1.62943	0.103223	0.986223	88.8889	11.1111	97.0664	2.93356	8.17755	NO
TCGA-56-7823-01B-11H-2246-13	LUSC	MIR135B	hsa-mir-135b	chr1	-	5p	205448347	NA	loop	NA	14	NA	G	GT	70	7	10	3.32193	33.1538	4.6744	5.35931e-79	2.76004e-76	-1.3286	0.18398	0.735229	90.9091	9.09091	97.0721	2.92793	6.16298	NO
TCGA-EE-A2GC-06A-11R-A18W-13	SKCM	MIR135B	hsa-mir-135b	chr1	-	5p	205448312	NA	flanking-3	NA	NA	11	C	T	69	6	11.5	3.52356	23.0505	4.22584	3.99841e-18	2.05918e-15	-0.765491	0.443979	0.352637	92	8	95.8421	4.15792	3.84208	NO
TCGA-A6-6141-01A-11H-1773-13	COAD	MIR136	hsa-mir-136	chr14	+	both	100884768	COSM1368270	non-seed duplex_3p	19	NA	NA	G	A	113	84	1.34524	0.427862	3.54197	1.57668	1.31517e-81	6.77312e-79	-1.37097	0.170385	0.768569	57.3604	42.6396	77.9831	22.0169	20.6227	NO
TCGA-22-5478-01A-01T-1634-13	LUSC	MIR136	hsa-mir-136	chr14	+	both	100884795	NA	flanking-3	NA	NA	24	G	A	160	34	4.70588	2.23447	3.36721	1.52255	1.17353e-53	6.04366e-51	0.943964	0.345188	0.461944	82.4742	17.5258	77.1021	22.8979	5.37216	NO
TCGA-ER-A193-06A-12R-A18V-13	SKCM	MIR136	hsa-mir-136	chr14	+	both	100884719	COSM3493815	seed_5p	4	NA	NA	C	T	73	29	2.51724	1.33184	5.77243	2.19654	2.40904e-17	1.24065e-14	-0.893638	0.371515	0.430023	71.5686	28.4314	85.2343	14.7657	13.6656	NO
TCGA-EB-A3Y6-01A-21R-A23A-13	SKCM	MIR136	hsa-mir-136	chr14	+	both	100884756	COSM3493816	seed_3p	7	NA	NA	C	A	73	19	3.84211	1.9419	5.74083	2.18889	0.00539216	1	-0.255472	0.798359	0.0978018	79.3478	20.6522	85.165	14.835	5.81722	NO
TCGA-B0-5095-01A-01R-1419-13	KIRC	MIR136	hsa-mir-136	chr14	+	both	100884745	COSM469664	loop	NA	7	NA	T	C	72	15	4.8	2.26303	5.05993	2.13983	0.0972432	1	0.158759	0.873859	0.0585586	82.7586	17.2414	83.4982	16.5018	0.739543	NO
TCGA-85-8351-01A-11H-2295-13	LUSC	MIR136	hsa-mir-136	chr14	+	both	100884757	COSM1368268	seed_3p	8	NA	NA	G	A	73	24	3.04167	1.60486	3.3706	1.52628	0.0416579	1	0.104571	0.916716	0.0377652	75.2577	24.7423	77.1198	22.8802	1.86211	NO
TCGA-AX-A3FT-01A-11R-A22I-13	UCEC	MIR139	hsa-mir-139	chr11	-	5p	72615044	NA	flanking-3	NA	NA	22	G	A	55	9	6.11111	2.61143	4.50936	1.89771	4.38025e-30	2.25583e-27	0.754307	0.450665	0.346146	85.9375	14.0625	81.8491	18.1509	4.08842	NO
TCGA-23-2081-01A-01R-1568-13	OV	MIR139	hsa-mir-139	chr11	-	5p	72615081	COSN18246415	seed_3p	8	NA	NA	C	T	690	435	1.58621	0.665581	1.62147	0.202357	4.18764e-24	2.15663e-21	0.485038	0.627649	0.202283	61.3333	38.6667	61.8534	38.1466	0.520062	NO
TCGA-D8-A1JG-01B-11R-A13P-13	BRCA	MIR140	hsa-mir-140	chr16	+	3p	69933099	COSN23014990	flanking-5	NA	NA	-4	C	T	152	1261	0.120539	-3.05243	0.0765489	-3.98124	1.08004e-168	5.56223e-166	1.00281	0.315954	0.500376	10.7573	89.2427	7.11058	92.8894	3.64667	NO
TCGA-AA-3833-01A-01T-0906-13	COAD	MIR140	hsa-mir-140	chr16	+	3p	69933129	NA	loop	NA	5	NA	C	T	71	631	0.11252	-3.15175	0.0797396	-3.8892	6.00095e-57	3.09049e-54	0.863113	0.388075	0.411084	10.114	89.886	7.38508	92.6149	2.72888	NO
TCGA-CQ-6225-01A-11R-1914-13	HNSC	MIR140	hsa-mir-140	chr16	+	3p	69933129	NA	loop	NA	5	NA	C	T	69	2343	0.0294494	-5.08562	0.0480969	-4.58598	3.09203e-44	1.5924e-41	-0.671191	0.502099	0.29921	2.8607	97.1393	4.58897	95.411	1.72828	NO
TCGA-P4-AAVL-01A-11R-A42U-13	KIRP	MIR140	hsa-mir-140	chr16	+	3p	69933178	NA	flanking-3	NA	NA	16	A	AC	276	9628	0.0286664	-5.1245	0.0360314	-4.93649	8.90414e-08	4.58563e-05	-0.321671	0.747702	0.126271	2.78675	97.2132	3.47783	96.5222	0.691073	NO
TCGA-Q1-A73O-01A-11R-A32K-13	CESC	MIR141	hsa-mir-141	chr12	+	3p	6964154	COSN16129757	loop	NA	20	NA	C	G	2698	3893	0.693039	-0.528992	0.889984	-0.505697	0.669253	1	-0.0243639	0.980562	0.00852479	40.9346	59.0654	47.0895	52.9105	6.15489	NO
TCGA-FF-A7CW-01A-11R-A38N-13	DLBC	MIR142	hsa-mir-142	chr17	-	both	58331239	NA	flanking-3	NA	NA	6	C	T	3681	59336	0.0620365	-4.01074	0.0421674	-4.62307	1.74619e-11	8.99286e-09	1.5085	0.131426	0.881318	5.84128	94.1587	4.04613	95.9539	1.79516	NO
TCGA-GS-A9TT-01A-11R-A38N-13	DLBC	MIR142	hsa-mir-142	chr17	-	both	58331234	NA	flanking-3	NA	NA	11	C	T	2129	68785	0.0309515	-5.01385	0.0421674	-4.62307	5.48145e-07	0.000282295	-0.962686	0.335705	0.474042	3.00223	96.9978	4.04613	95.9539	1.0439	NO
TCGA-EW-A1IX-01A-12R-A143-13	BRCA	MIR142	hsa-mir-142	chr17	-	both	58331303	COSN23015190	non-seed duplex_5p	1	NA	NA	G	T	245	11845	0.0206838	-5.59535	0.0439501	-4.87607	7.16853e-115	3.69179e-112	-0.775839	0.437844	0.358681	2.02647	97.9735	4.20998	95.79	2.18351	NO
TCGA-FF-8041-01A-11R-2212-13	DLBC	MIR142	hsa-mir-142	chr17	-	both	58331260	COSN4769864	seed_3p	8	NA	NA	A	G	6221	161663	0.0384813	-4.6997	0.042137	-4.6241	0.634459	1	0.345498	0.729794	0.1368	3.70553	96.2945	4.04332	95.9567	0.337789	NO
TCGA-FA-A4BB-01A-11R-A31S-13	DLBC	MIR142	hsa-mir-142	chr17	-	both	58331260	COSN4769864	seed_3p	8	NA	NA	A	G	2694	51906	0.0519015	-4.26808	0.042137	-4.6241	0.634459	1	0.345498	0.729794	0.1368	4.93407	95.0659	4.04332	95.9567	0.890742	NO
TCGA-DK-A1AC-01A-11R-A13X-13	BLCA	MIR142	hsa-mir-142	chr17	-	both	58331272	COSN513890	loop	NA	11	NA	C	T	367	7354	0.0499048	-4.32468	0.0650801	-4.11138	9.27746e-10	4.77789e-07	-0.306835	0.758969	0.119776	4.75327	95.2467	6.11035	93.8897	1.35708	NO
TCGA-AB-2805-03A-01T-0734-13	LAML	MIR142	hsa-mir-142	chr17	-	both	58331261	COSN4710472	seed_3p	7	NA	NA	C	G	1298	83810	0.0154874	-6.01276	0.0228599	-5.75767	0.000178775	0.0920692	-0.278124	0.780917	0.107395	1.52512	98.4749	2.2349	97.7651	0.709782	NO
TCGA-AB-2807-03A-01T-0734-13	LAML	MIR142	hsa-mir-142	chr17	-	both	58331264	COSN187665	seed_3p	4	NA	NA	T	C	1478	83248	0.0177542	-5.8157	0.0228917	-5.75563	0.369327	1	-0.0654577	0.94781	0.0232789	1.74445	98.2556	2.23794	97.7621	0.493492	NO
TCGA-55-8205-01A-11H-2240-13	LUAD	MIR143	hsa-mir-143	chr5	+	3p	149428971	NA	loop	NA	6	NA	G	T	604	405156	0.00149078	-9.38971	0.000853497	-11.1348	6.81438e-71	3.50941e-68	0.917052	0.359115	0.444766	0.148856	99.8511	0.085277	99.9147	0.0635795	NO
TCGA-D1-A174-01A-11R-A12H-13	UCEC	MIR143	hsa-mir-143	chr5	+	3p	149428924	NA	flanking-5	NA	NA	-20	C	A	531	387383	0.00137074	-9.51083	0.00134372	-10.0683	6.51444e-21	3.35493e-18	0.418872	0.67531	0.170497	0.136886	99.8631	0.134192	99.8658	0.00269451	NO
TCGA-D3-A3C3-06A-12R-A18V-13	SKCM	MIR144	hsa-mir-144	chr17	-	both	28861615	NA	flanking-5	NA	NA	-11	C	T	94	9	10.4444	3.38466	30.8617	4.49939	2.34828e-39	1.20936e-36	-0.961262	0.33642	0.473118	91.2621	8.73786	96.8614	3.13856	5.5993	NO
TCGA-XF-A9T8-01A-11R-A39B-13	BLCA	MIR144	hsa-mir-144	chr17	-	both	28861531	NA	flanking-3	NA	NA	17	C	A	66	8	8.25	3.04439	13.5314	3.50065	3.67168e-23	1.89091e-20	-0.52963	0.596369	0.224485	89.1892	10.8108	93.1183	6.88166	3.92915	NO
TCGA-OR-A5J5-01A-11R-A29W-13	ACC	MIR144	hsa-mir-144	chr17	-	both	28861543	NA	flanking-3	NA	NA	5	G	A	158	11	14.3636	3.84435	17.6971	4.03945	0.00212449	1	-0.360029	0.718825	0.143377	93.4911	6.50888	94.6516	5.34842	1.16046	NO
TCGA-60-2703-01A-11H-2044-13	LUSC	MIR145	hsa-mir-145	chr5	+	5p	149430694	NA	loop	NA	11	NA	G	C	3787	114	33.2193	5.05395	38.09	5.18671	1.27324e-10	6.55717e-08	-0.3011	0.763338	0.117283	97.0777	2.92233	97.4418	2.5582	0.364129	NO
TCGA-AP-A0LS-01A-11R-A14C-13	UCEC	MIR1468	hsa-mir-1468	chrX	-	5p	63786098	NA	flanking-5	NA	NA	-23	TC	T	52	1	52	5.70044	112.972	6.6078	9.73241e-46	5.01219e-43	-1.24988	0.211344	0.675011	98.1132	1.88679	99.1226	0.877408	1.00938	NO
TCGA-DX-A8BR-01A-11R-A41D-13	SARC	MIR146A	hsa-mir-146a	chr5	+	5p	160485446	NA	flanking-3	NA	NA	17	A	C	275	8	34.375	5.10329	312.45	6.83798	2.25768e-29	1.16271e-26	-0.958612	0.337754	0.471399	97.1731	2.82686	99.681	0.31903	2.50782	NO
TCGA-CS-5390-01A-02R-1469-13	LGG	MIR146A	hsa-mir-146a	chr5	+	5p	160485429	COSN8635147	non-seed duplex_3p	22	NA	NA	G	C	162	1	162	7.33985	113.468	6.18472	6.38478e-58	3.28816e-55	0.830887	0.406037	0.391434	99.3865	0.613497	99.1264	0.873607	0.26011	NO
TCGA-D5-6928-01A-11H-1927-13	COAD	MIR146A	hsa-mir-146a	chr5	+	5p	160485354	NA	flanking-5	NA	NA	-18	G	A	1508	3	502.667	8.97346	611.945	7.76346	2.14935e-26	1.10692e-23	0.532698	0.594242	0.226036	99.8015	0.198544	99.8369	0.163147	0.0353972	NO
TCGA-BR-8361-01A-11R-2343-13	STAD	MIR147B	hsa-mir-147b	chr15	+	3p	45433140	NA	flanking-3	NA	NA	22	AT	A	12	154	0.0779221	-3.68182	0.335834	-2.18279	2.20369e-14	1.1349e-11	-1.11497	0.264861	0.576981	7.22892	92.7711	25.1404	74.8596	17.9115	NO
TCGA-HF-7133-01A-11R-2055-13	STAD	MIR148A	hsa-mir-148a	chr7	-	3p	25949900	NA	flanking-3	NA	NA	22	T	G	349	73481	0.00474953	-7.718	0.00142984	-9.60828	1.32663e-210	6.83216e-208	2.77028	0.00560081	2.25175	0.472708	99.5273	0.14278	99.8572	0.329928	NO
TCGA-G4-6586-01A-11H-1773-13	COAD	MIR148A	hsa-mir-148a	chr7	-	3p	25949904	NA	flanking-3	NA	NA	18	C	T	258	135670	0.00190167	-9.03851	0.0012618	-9.87413	1.05486e-66	5.43254e-64	0.96071	0.336698	0.47276	0.189806	99.8102	0.126021	99.874	0.0637859	NO
TCGA-CV-5443-01A-01R-1513-13	HNSC	MIR148A	hsa-mir-148a	chr7	-	3p	25949998	NA	flanking-5	NA	NA	-17	C	T	886	836614	0.00105903	-9.88304	0.00178817	-9.43151	2.93552e-26	1.51179e-23	-0.489411	0.624551	0.204432	0.105791	99.8942	0.178498	99.8215	0.072707	NO
TCGA-04-1347-01A-01R-1564-13	OV	MIR148A	hsa-mir-148a	chr7	-	3p	25949900	NA	flanking-3	NA	NA	22	T	G	15	1658	0.00904704	-6.78834	0.0114641	-6.70367	0.0486062	1	-0.0885866	0.92941	0.0317925	0.896593	99.1034	1.13342	98.8666	0.236826	NO
TCGA-CV-7427-01A-11R-2080-13	HNSC	MIR148B	hsa-mir-148b	chr12	+	3p	54337215	NA	flanking-5	NA	NA	-25	C	T	8	910	0.00879121	-6.82972	0.0092076	-6.96601	6.75822e-05	0.0348048	0.175484	0.860699	0.0651486	0.87146	99.1285	0.912359	99.0876	0.0408995	NO
TCGA-AX-A3FT-01A-11R-A22I-13	UCEC	MIR148B	hsa-mir-148b	chr12	+	3p	54337228	NA	flanking-5	NA	NA	-12	G	T	6	832	0.00721154	-7.11548	0.0076772	-7.23913	0.000537482	0.276803	0.149157	0.88143	0.0548123	0.71599	99.284	0.761871	99.2381	0.0458803	NO
TCGA-OR-A5K1-01A-11R-A29W-13	ACC	MIR149	hsa-mir-149	chr2	+	5p	240456086	NA	flanking-3	NA	NA	10	T	C	763	9	84.7778	6.40561	82.9568	5.94361	0.388255	1	0.617836	0.536707	0.270263	98.8342	1.1658	98.8089	1.19109	0.0252852	NO
TCGA-OR-A5KZ-01A-11R-A29W-13	ACC	MIR149	hsa-mir-149	chr2	+	5p	240456086	NA	flanking-3	NA	NA	10	T	C	913	8	114.125	6.83447	82.9568	5.94361	0.388255	1	0.617836	0.536707	0.270263	99.1314	0.868621	98.8089	1.19109	0.322467	NO
TCGA-AA-3949-01A-01T-1021-13	COAD	MIR150	hsa-mir-150	chr19	-	5p	49500856	NA	flanking-5	NA	NA	-3	G	T	584	2	292	8.18982	194.59	7.2894	2.0654e-64	1.06368e-61	0.937565	0.348468	0.457837	99.6587	0.341297	99.4887	0.511275	0.169978	NO
TCGA-ET-A25J-01A-11R-A16Q-13	THCA	MIR152	hsa-mir-152	chr17	-	3p	48037240	NA	flanking-5	NA	NA	-8	G	A	1	5403	0.000185082	-12.3995	0.00174269	-9.4733	1.81528e-262	9.34871e-260	-3.05446	0.00225466	2.64692	0.0185048	99.9815	0.173965	99.826	0.155461	NO
TCGA-18-5595-01A-01T-1634-13	LUSC	MIR155	hsa-mir-155	chr21	+	5p	25573966	NA	flanking-5	NA	NA	-17	C	T	249	4	62.25	5.96	833.5	9.21109	1.00502e-228	5.17587e-226	-2.81742	0.00484109	2.31506	98.419	1.58103	99.8802	0.119832	1.4612	NO
TCGA-VQ-A94O-01A-11R-A415-13	STAD	MIR155	hsa-mir-155	chr21	+	5p	25574065	NA	flanking-3	NA	NA	22	C	A	1572	8	196.5	7.61839	975.505	9.46018	1.02238e-122	5.26527e-120	-1.57773	0.114627	0.940714	99.4937	0.506329	99.8976	0.102406	0.403923	NO
TCGA-DK-A1A3-01A-11R-A13X-13	BLCA	MIR155	hsa-mir-155	chr21	+	5p	25574025	COSN2376761	seed_3p	4	NA	NA	C	T	1397	1	1397	10.4481	1051.24	9.39423	2.01117e-44	1.03575e-41	0.774156	0.438838	0.357695	99.9285	0.0715308	99.905	0.0950354	0.0235047	NO
TCGA-A6-3809-01A-01T-1021-13	COAD	MIR15A	hsa-mir-15a	chr13	-	5p	50049206	NA	flanking-5	NA	NA	-18	AT	A	93	3	31	4.9542	288.149	7.69125	1.33312e-173	6.86556e-171	-2.2323	0.025595	1.59184	96.875	3.125	99.6542	0.345843	2.77916	NO
TCGA-ZB-A966-01A-11R-A42U-13	THYM	MIR15A	hsa-mir-15a	chr13	-	5p	50049206	NA	flanking-5	NA	NA	-18	AT	A	2315	7	330.714	8.36944	731.794	9.36602	2.47787e-35	1.2761e-32	-1.58913	0.112031	0.950664	99.6985	0.301464	99.8635	0.136464	0.165	NO
TCGA-AX-A05S-01A-11R-A00W-13	UCEC	MIR15A	hsa-mir-15a	chr13	-	5p	50049206	NA	flanking-5	NA	NA	-18	AT	A	362	1	362	8.49985	275.737	7.74031	4.06466e-49	2.0933e-46	0.70223	0.482536	0.31647	99.7245	0.275482	99.6386	0.361354	0.085872	NO
TCGA-F4-6856-01A-11H-1927-13	COAD	MIR15A	hsa-mir-15a	chr13	-	5p	50049206	NA	flanking-5	NA	NA	-18	A	AT	240	1	240	7.90689	288.149	7.69125	0.630457	1	0.340819	0.733254	0.134746	99.5851	0.414938	99.6542	0.345843	0.0690953	NO
TCGA-A6-6653-01A-11H-1773-13	COAD	MIR15A	hsa-mir-15a	chr13	-	5p	50049206	NA	flanking-5	NA	NA	-18	A	AT	953	3	317.667	8.31137	288.149	7.69125	0.630457	1	0.340819	0.733254	0.134746	99.6862	0.313808	99.6542	0.345843	0.032035	NO
TCGA-66-2791-01A-01T-0981-13	LUSC	MIR15B	hsa-mir-15b	chr3	+	5p	160404673	NA	flanking-3	NA	NA	7	T	C	229	72	3.18056	1.66928	4.63116	2.06568	1.85836e-35	9.57055e-33	-0.619569	0.535542	0.271207	76.0797	23.9203	82.2417	17.7583	6.16194	NO
TCGA-A2-A0SU-01A-11R-A085-13	BRCA	MIR15B	hsa-mir-15b	chr3	+	5p	160404598	NA	flanking-5	NA	NA	-9	A	T	233	48	4.85417	2.27922	7.40428	2.24311	0.227224	1	0.0364125	0.970953	0.0128016	82.9181	17.0819	88.1013	11.8987	5.18315	NO
TCGA-CM-5341-01A-01T-1409-13	COAD	MIR17	hsa-mir-17	chr13	+	5p	91350688	NA	flanking-3	NA	NA	12	C	G	4384	1396	3.1404	1.65095	3.08337	1.27106	7.51266e-15	3.86902e-12	0.377222	0.706009	0.15119	75.8478	24.1522	75.5104	24.4896	0.337341	NO
TCGA-G4-6588-01A-11H-1773-13	COAD	MIR17	hsa-mir-17	chr13	+	5p	91350602	NA	flanking-5	NA	NA	-16	CCA	C	2875	1310	2.19466	1.134	3.08337	1.27106	0.00387351	1	-0.136105	0.891739	0.0497625	68.6977	31.3023	75.5104	24.4896	6.81268	NO
TCGA-D8-A1XK-01A-21R-A14L-13	BRCA	MIR181C	hsa-mir-181c	chr19	+	5p	13874754	COSN23015345	loop	NA	8	NA	G	A	113	229	0.49345	-1.01902	0.936711	-0.199715	1.67557e-269	8.6292e-267	-1.46515	0.14288	0.84503	33.0409	66.9591	48.3661	51.6339	15.3251	NO
TCGA-ZN-A9VQ-01A-11R-A404-13	MESO	MIR182	hsa-mir-182	chr7	-	5p	129770387	NA	flanking-3	NA	NA	19	C	T	236488	1	236488	17.8514	43554.7	14.792	2.71392e-31	1.39767e-28	1.97784	0.047947	1.31924	99.9996	0.000422853	99.9977	0.00229591	0.00187306	NO
TCGA-93-8067-01A-11H-2286-13	LUAD	MIR182	hsa-mir-182	chr7	-	5p	129770392	NA	flanking-3	NA	NA	14	G	A	26369	1	26369	14.6866	73969.6	15.7482	5.05435e-75	2.60299e-72	-0.953663	0.340254	0.468196	99.9962	0.00379219	99.9986	0.00135189	0.0024403	NO
TCGA-EE-A3J5-06A-11R-A20E-13	SKCM	MIR182	hsa-mir-182	chr7	-	5p	129770412	COSN5029509	non-seed duplex_3p	15	NA	NA	G	A	1836	1	1836	10.8424	11819.5	12.3027	4.10896e-53	2.11611e-50	-0.83087	0.406047	0.391424	99.9456	0.0544366	99.9915	0.00845985	0.0459767	NO
TCGA-AA-A01R-01A-21R-A082-13	COAD	MIR182	hsa-mir-182	chr7	-	5p	129770388	NA	flanking-3	NA	NA	18	G	A	16465	1	16465	14.0071	55225.8	15.0902	3.60515e-44	1.85665e-41	-0.729612	0.465627	0.331961	99.9939	0.00607312	99.9982	0.00181071	0.00426241	NO
TCGA-EO-A3AU-01A-21R-A19V-13	UCEC	MIR182	hsa-mir-182	chr7	-	5p	129770491	NA	flanking-5	NA	NA	-21	TC	T	152985	2	76492.5	16.223	84572.4	15.8454	2.08832e-10	1.07549e-07	0.277468	0.781421	0.107115	99.9987	0.0013073	99.9988	0.00118241	0.000124895	NO
TCGA-D1-A17T-01A-11R-A12H-13	UCEC	MIR185	hsa-mir-185	chr22	+	5p	20033146	NA	flanking-5	NA	NA	-7	G	T	81	21	3.85714	1.94753	8.11619	2.80437	7.95149e-81	4.09502e-78	-0.987961	0.323172	0.490567	79.4118	20.5882	89.0305	10.9695	9.61875	NO
TCGA-D8-A1JB-01A-11R-A13P-13	BRCA	MIR185	hsa-mir-185	chr22	+	5p	20033224	NA	flanking-3	NA	NA	15	A	T	135	20	6.75	2.75489	11.9128	3.25494	1.1573e-63	5.96008e-61	-0.55005	0.582285	0.234865	87.0968	12.9032	92.2557	7.74427	5.15896	NO
TCGA-H9-7775-01A-11R-2117-13	PRAD	MIR185	hsa-mir-185	chr22	+	5p	20033226	NA	flanking-3	NA	NA	17	C	G	303	15	20.2	4.33628	17.5983	3.95609	1.25869e-28	6.48224e-26	0.541335	0.588276	0.230419	95.283	4.71698	94.6232	5.37684	0.659862	NO
TCGA-XF-A9SM-01A-11R-A42V-13	BLCA	MIR185	hsa-mir-185	chr22	+	5p	20033213	NA	flanking-3	NA	NA	4	C	T	677	43	15.7442	3.97675	13.6965	3.58898	1.32622e-23	6.83003e-21	0.521811	0.601802	0.220547	94.0278	5.97222	93.1957	6.80433	0.832105	NO
TCGA-MI-A75C-01A-11R-A32J-13	LIHC	MIR186	hsa-mir-186	chr1	-	5p	71067697	COSN16303119	seed_5p	6	NA	NA	T	A	1013	4	253.25	7.98442	947.952	9.62021	8.4635e-121	4.3587e-118	-1.83235	0.0668999	1.17457	99.6067	0.393314	99.8946	0.105379	0.287934	NO
TCGA-AA-3492-01A-01T-1409-13	COAD	MIR186	hsa-mir-186	chr1	-	5p	71067644	COSN18162915	non-seed duplex_3p	20	NA	NA	CA	C	598	2	299	8.224	552.51	8.77559	9.71824e-29	5.00489e-26	-0.558712	0.576358	0.239307	99.6667	0.333333	99.8193	0.180665	0.152668	NO
TCGA-E5-A2PC-01A-11R-A205-13	BLCA	MIR18A	hsa-mir-18a	chr13	+	5p	91350745	NA	flanking-5	NA	NA	-11	G	T	73	13	5.61538	2.48938	10.8325	3.23443	2.18284e-57	1.12416e-54	-0.989858	0.322244	0.491816	84.8837	15.1163	91.5487	8.45129	6.66499	NO
TCGA-MV-A51V-01A-11R-A26X-13	BLCA	MIR18A	hsa-mir-18a	chr13	+	5p	91350741	NA	flanking-5	NA	NA	-15	G	C	336	36	9.33333	3.22239	10.8325	3.23443	0.757308	1	-0.0159907	0.987242	0.00557645	90.3226	9.67742	91.5487	8.45129	1.22613	NO
TCGA-DD-AACM-01A-11R-A41H-13	LIHC	MIR191	hsa-mir-191	chr3	-	5p	49020611	NA	flanking-3	NA	NA	20	G	T	8887	52	170.904	7.41704	351.534	8.18112	5.66963e-48	2.91986e-45	-0.876859	0.380563	0.419573	99.4183	0.581721	99.7163	0.28366	0.29806	NO
TCGA-UT-A88E-01B-11R-A404-13	MESO	MIR191	hsa-mir-191	chr3	-	5p	49020659	NA	loop	NA	13	NA	G	A	2292	6	382	8.57743	324.183	8.17577	4.80198e-07	0.000247302	0.587873	0.556618	0.254443	99.7389	0.261097	99.6925	0.307519	0.0464225	NO
TCGA-AX-A1C5-01A-11R-A136-13	UCEC	MIR191	hsa-mir-191	chr3	-	5p	49020612	NA	flanking-3	NA	NA	19	C	T	5005	37	135.27	7.0797	216.583	7.49487	4.96195e-26	2.55541e-23	-0.476392	0.633795	0.198051	99.2662	0.733836	99.5404	0.459595	0.274241	NO
TCGA-A3-3387-01A-01R-1540-13	KIRC	MIR192	hsa-mir-192	chr11	-	5p	64891164	COSN2377058	non-seed duplex_3p	17	NA	NA	A	G	25502	46	554.391	9.11476	376.156	8.37028	4.63719e-81	2.38815e-78	0.976143	0.328993	0.482813	99.8199	0.180053	99.7349	0.265142	0.0850891	NO
TCGA-D1-A1NZ-01A-21R-A14C-13	UCEC	MIR192	hsa-mir-192	chr11	-	5p	64891144	NA	flanking-3	NA	NA	15	T	C	15582	65	239.723	7.90522	334.749	8.12407	6.91887e-09	3.56322e-06	-0.252135	0.800937	0.0964018	99.5846	0.415415	99.7022	0.297841	0.117574	NO
TCGA-AN-A0FL-01A-11R-A035-13	BRCA	MIR193A	hsa-mir-193a	chr17	+	both	31560083	NA	flanking-3	NA	NA	12	G	T	104	10	10.4	3.37851	27.2486	4.49201	5.70773e-246	2.93948e-243	-1.3304	0.183385	0.736635	91.2281	8.77193	96.46	3.53999	5.23194	NO
TCGA-ER-A19H-06A-12R-A18V-13	SKCM	MIR193B	hsa-mir-193b	chr16	+	3p	14303982	COSN5027646	seed_5p	3	NA	NA	G	A	40	281	0.142349	-2.8125	0.103923	-3.47098	4.80619e-54	2.47519e-51	0.869833	0.384392	0.415226	12.4611	87.5389	9.41396	90.586	3.0471	NO
TCGA-KL-8326-01A-11R-2314-13	KICH	MIR193B	hsa-mir-193b	chr16	+	3p	14303955	NA	flanking-5	NA	NA	-25	C	CT	89	1033	0.0861568	-3.53689	0.130062	-3.07716	2.56193e-06	0.00131939	-0.665388	0.505802	0.296019	7.93226	92.0677	11.5093	88.4907	3.57703	NO
TCGA-AN-A0XW-01A-11R-A108-13	BRCA	MIR193B	hsa-mir-193b	chr16	+	3p	14303989	COSN23014894	non-seed duplex_5p	10	NA	NA	G	C	11	189	0.0582011	-4.10281	0.0853322	-3.73096	3.99124e-57	2.05549e-54	-0.513176	0.607828	0.216219	5.5	94.5	7.86231	92.1377	2.36231	NO
TCGA-29-1762-01A-01R-1567-13	OV	MIR195	hsa-mir-195	chr17	-	5p	7017648	COSN518969	seed_3p	2	NA	NA	G	C	22	205	0.107317	-3.22005	0.604237	-2.04851	1.96014e-23	1.00947e-20	-0.729243	0.465853	0.331751	9.69163	90.3084	37.6651	62.3349	27.9734	NO
TCGA-64-5779-01A-01T-1627-13	LUAD	MIR196B	hsa-mir-196b	chr7	-	5p	27169521	COSN24409123	loop	NA	7	NA	G	T	2020	1	2020	10.9801	710.993	8.17468	1.1333e-93	5.83652e-91	1.53503	0.124776	0.903869	99.9505	0.0494805	99.8595	0.140451	0.0909704	NO
TCGA-YG-AA3O-06A-11R-A38N-13	SKCM	MIR196B	hsa-mir-196b	chr7	-	5p	27169565	NA	flanking-5	NA	NA	-16	C	T	209	1	209	7.70736	1765.74	10.0161	2.06268e-106	1.06228e-103	-1.42181	0.15508	0.809443	99.5238	0.47619	99.9434	0.0566014	0.419589	NO
TCGA-ET-A3DS-01A-11R-A19N-13	THCA	MIR196B	hsa-mir-196b	chr7	-	5p	27169566	NA	flanking-5	NA	NA	-17	T	A	57	1	57	5.83289	131.219	6.56191	6.76564e-33	3.4843e-30	-0.863256	0.387997	0.411172	98.2759	1.72414	99.2437	0.756322	0.967816	NO
TCGA-46-3769-01A-01T-0981-13	LUSC	MIR196B	hsa-mir-196b	chr7	-	5p	27169539	COSN2378927	non-seed duplex_5p	11	NA	NA	G	A	510	1	510	8.99435	1224.8	9.69046	2.512e-25	1.29368e-22	-0.512042	0.608621	0.215653	99.8043	0.195695	99.9184	0.0815797	0.114115	NO
TCGA-78-7155-01A-11H-2038-13	LUAD	MIR196B	hsa-mir-196b	chr7	-	5p	27169485	NA	flanking-3	NA	NA	8	G	A	175	1	175	7.45121	710.993	8.17468	1.0642e-12	5.48063e-10	-0.395853	0.692214	0.15976	99.4318	0.568182	99.8595	0.140451	0.427731	NO
TCGA-EE-A17X-06A-11R-A18V-13	SKCM	MIR197	hsa-mir-197	chr1	+	3p	109598948	COSN5026096	non-seed duplex_3p	9	NA	NA	C	A	5	1298	0.00385208	-8.02015	0.00090376	-10.6889	1.42863e-182	7.35742e-180	2.31941	0.0203726	1.69095	0.38373	99.6163	0.0902943	99.9097	0.293436	NO
TCGA-AJ-A8CV-01A-11R-A37P-13	UCEC	MIR197	hsa-mir-197	chr1	+	3p	109598937	NA	loop	NA	14	NA	C	T	2	1865	0.00107239	-9.86496	0.00104708	-10.2912	2.49456e-19	1.2847e-16	0.399993	0.689162	0.161679	0.107124	99.8929	0.104598	99.8954	0.00252563	NO
TCGA-DK-A1AB-01A-11R-A13X-13	BLCA	MIR197	hsa-mir-197	chr1	+	3p	109598984	NA	flanking-3	NA	NA	23	C	T	1	1180	0.000847458	-10.2046	0.00112514	-10.1273	0.113412	1	-0.0776856	0.938078	0.027761	0.084674	99.9153	0.112387	99.8876	0.0277134	NO
TCGA-A4-7828-01A-11R-2138-13	KIRP	MIR19A	hsa-mir-19a	chr13	+	3p	91350980	NA	flanking-3	NA	NA	19	T	G	1	149	0.00671141	-7.21917	0.0111015	-6.69279	1.40587e-20	7.24021e-18	-0.6768	0.498533	0.302306	0.666667	99.3333	1.09796	98.902	0.431291	NO
TCGA-G3-A25T-01A-11R-A16S-13	LIHC	MIR200A	hsa-mir-200a	chr1	+	3p	1167904	COSN16303208	loop	NA	5	NA	C	G	12307	5800	2.1219	1.08535	1.70386	0.607268	1.29805e-29	6.68496e-27	0.734005	0.462946	0.33447	67.9682	32.0318	63.0159	36.9841	4.95234	NO
TCGA-G2-A3IE-01A-11R-A20E-13	BLCA	MIR200A	hsa-mir-200a	chr1	+	3p	1167903	COSN513603	loop	NA	4	NA	C	T	4636	3367	1.37689	0.461417	2.13483	0.890513	1.76983e-27	9.11461e-25	-0.57707	0.563892	0.248804	57.9283	42.0717	68.1004	31.8996	10.1721	NO
TCGA-R6-A6XG-01B-11R-A337-13	ESCA	MIR200A	hsa-mir-200a	chr1	+	3p	1167908	NA	loop	NA	9	NA	C	T	10535	5482	1.92174	0.942416	1.69903	0.650117	5.20195e-11	2.67901e-08	0.5147	0.606763	0.216981	65.7739	34.2261	62.9497	37.0503	2.82418	NO
TCGA-ED-A459-01A-11R-A25Z-13	LIHC	MIR200A	hsa-mir-200a	chr1	+	3p	1167893	COSN16303181	non-seed duplex_5p	16	NA	NA	T	A	105	74	1.41892	0.504792	1.70965	0.612706	0.00455763	1	-0.165871	0.868258	0.0613511	58.6592	41.3408	63.0949	36.9051	4.4357	NO
TCGA-2G-AAG3-01A-11R-A439-13	TGCT	MIR200C	hsa-mir-200c	chr12	+	3p	6963698	NA	flanking-5	NA	NA	-5	G	A	64	24132	0.00265208	-8.55866	0.0148428	-6.5219	1.3956e-45	7.18736e-43	-1.63714	0.101601	0.993102	0.264507	99.7355	1.46258	98.5374	1.19807	NO
TCGA-EE-A2MD-06A-11R-A18W-13	SKCM	MIR204	hsa-mir-204	chr9	-	5p	70810071	NA	flanking-5	NA	NA	-19	G	A	919	2	459.5	8.84392	111.657	6.49363	3.41504e-132	1.75875e-129	2.3114	0.0208106	1.68172	99.7828	0.217155	99.1124	0.887648	0.670493	NO
TCGA-BT-A0YX-01A-11R-A10V-13	BLCA	MIR205	hsa-mir-205	chr1	+	5p	209432226	COSN8407113	flanking-3	NA	NA	3	G	C	47320	9	5257.78	12.3602	2724.76	11.0711	4.18357e-77	2.15454e-74	1.1392	0.254619	0.59411	99.981	0.0190158	99.9633	0.036687	0.0176711	NO
TCGA-UY-A9PD-01A-11R-A38M-13	BLCA	MIR205	hsa-mir-205	chr1	+	5p	209432162	NA	flanking-5	NA	NA	-4	C	T	20947	5	4189.4	12.0325	2724.76	11.0711	5.24585e-51	2.70161e-48	0.849616	0.395539	0.402811	99.9761	0.0238641	99.9633	0.036687	0.0128229	NO
TCGA-VR-A8EW-01A-11R-A36E-13	ESCA	MIR205	hsa-mir-205	chr1	+	5p	209432147	NA	flanking-5	NA	NA	-19	AAT	A	122527	37	3311.54	11.6933	1919.9	10.0452	7.12953e-20	3.67171e-17	0.832043	0.405385	0.392133	99.9698	0.0301883	99.9479	0.0520591	0.0218708	NO
TCGA-FU-A2QG-01A-11R-A18L-13	CESC	MIR205	hsa-mir-205	chr1	+	5p	209432167	COSN2378349	seed_5p	2	NA	NA	C	T	123220	55	2240.36	11.1295	1563.88	10.3109	7.26215e-34	3.74001e-31	0.78532	0.432266	0.364249	99.9554	0.0446157	99.9361	0.0639025	0.0192868	NO
TCGA-XV-A9W5-01A-11R-A38N-13	SKCM	MIR205	hsa-mir-205	chr1	+	5p	209432167	COSN2378349	seed_5p	2	NA	NA	C	T	6898	4	1724.5	10.752	1912.58	9.19405	4.48327e-11	2.30888e-08	0.62844	0.529716	0.275957	99.942	0.0579542	99.9477	0.052258	0.00569619	NO
TCGA-18-5595-01A-01T-1634-13	LUSC	MIR205	hsa-mir-205	chr1	+	5p	209432167	COSN2378349	seed_5p	2	NA	NA	C	T	50445	26	1940.19	10.922	2324	10.9304	0.848377	1	-0.00876793	0.993004	0.00304887	99.9485	0.0515147	99.957	0.0430108	0.00850394	NO
TCGA-ZF-AA56-01A-31R-A39B-13	BLCA	MIR20A	hsa-mir-20a	chr13	+	5p	91351142	NA	flanking-3	NA	NA	13	T	C	1006	40	25.15	4.65249	66.0265	5.80612	3.93804e-93	2.02809e-90	-1.32305	0.185818	0.730912	96.1759	3.82409	98.5081	1.49195	2.33215	NO
TCGA-DD-AAE7-01A-11R-A41H-13	LIHC	MIR20A	hsa-mir-20a	chr13	+	5p	91351103	NA	loop	NA	9	NA	T	C	2349	18	130.5	7.02791	87.4604	6.28088	1.22607e-61	6.31426e-59	1.04611	0.295509	0.529429	99.2395	0.760456	98.8696	1.13045	0.369993	NO
TCGA-BL-A3JM-01A-12R-A21E-13	BLCA	MIR20A	hsa-mir-20a	chr13	+	5p	91351118	COSN513764	non-seed duplex_3p	11	NA	NA	G	C	4224	49	86.2041	6.42968	65.9779	5.80506	3.23319e-39	1.66509e-36	0.716425	0.473729	0.32447	98.8533	1.14674	98.507	1.49303	0.346294	NO
TCGA-A6-6653-01A-11H-1773-13	COAD	MIR20A	hsa-mir-20a	chr13	+	5p	91351125	COSN23012485	non-seed duplex_3p	18	NA	NA	T	TA	2809	68	41.3088	5.36838	36.76	4.73192	3.35936e-23	1.73007e-20	0.491807	0.622855	0.205613	97.6364	2.36357	97.3517	2.6483	0.28473	NO
TCGA-QF-A5YS-01A-11R-A31S-13	UCEC	MIR20B	hsa-mir-20b	chrX	-	5p	134169794	NA	flanking-3	NA	NA	19	G	T	734	26	28.2308	4.8192	15.9877	3.71219	8.12083e-77	4.18223e-74	1.10876	0.267533	0.572623	96.5789	3.42105	94.1134	5.88663	2.46557	NO
TCGA-B5-A0KB-01B-11R-A14C-13	UCEC	MIR20B	hsa-mir-20b	chrX	-	5p	134169795	NA	flanking-3	NA	NA	18	A	G	2671	161	16.5901	4.05225	15.9877	3.71219	6.62636e-12	3.41257e-09	0.340597	0.733407	0.134655	94.315	5.68503	94.1134	5.88663	0.201598	NO
TCGA-XF-AAN3-01A-11R-A42V-13	BLCA	MIR21	hsa-mir-21	chr17	+	5p	59841300	NA	loop	NA	6	NA	G	A	1716962	5944	288.856	8.17421	125.411	6.68544	4.11701e-119	2.12026e-116	1.63406	0.102247	0.990349	99.655	0.344999	99.2089	0.79107	0.446071	NO
TCGA-FA-A6HN-01A-11R-A31S-13	DLBC	MIR21	hsa-mir-21	chr17	+	5p	59841260	NA	flanking-5	NA	NA	-13	C	G	1193557	21482	55.5608	5.796	165.571	7.09061	2.13378e-12	1.0989e-09	-1.40855	0.158967	0.798692	98.232	1.76801	99.3997	0.600343	1.16767	NO
TCGA-VS-A959-01A-11R-A42V-13	CESC	MIR21	hsa-mir-21	chr17	+	5p	59841322	COSN8603510	non-seed duplex_3p	12	NA	NA	G	A	2695507	12012	224.401	7.80994	113.47	6.47752	2.41552e-73	1.24399e-70	1.38595	0.165762	0.780515	99.5563	0.443653	99.1264	0.873591	0.429937	NO
TCGA-98-A538-01A-11H-A263-13	LUSC	MIR21	hsa-mir-21	chr17	+	5p	59841267	NA	flanking-5	NA	NA	-6	G	T	1558484	15649	99.59	6.63793	80.737	6.15485	9.57393e-41	4.93058e-38	0.674565	0.499952	0.301071	99.0059	0.994135	98.7766	1.22344	0.229302	NO
TCGA-BT-A42F-01A-11R-A23X-13	BLCA	MIR21	hsa-mir-21	chr17	+	5p	59841300	NA	loop	NA	6	NA	G	C	2200739	30702	71.6806	6.16351	125.411	6.68544	2.11656e-27	1.09003e-24	-0.572867	0.566735	0.24662	98.6241	1.37588	99.2089	0.79107	0.584812	NO
TCGA-CV-6942-01A-21R-2015-13	HNSC	MIR21	hsa-mir-21	chr17	+	5p	59841249	NA	flanking-5	NA	NA	-24	C	G	1860149	29969	62.0691	5.9558	64.4641	5.79422	8.26177e-06	0.00425481	0.196722	0.844045	0.0736343	98.4144	1.58556	98.4724	1.52756	0.0580066	NO
TCGA-HF-7136-01A-11R-2055-13	STAD	MIR217	hsa-mir-217	chr2	-	5p	55982979	NA	flanking-3	NA	NA	5	C	A	147	2	73.5	6.19967	192.812	7.12227	1.51229e-40	7.78832e-38	-0.812976	0.416232	0.380665	98.6577	1.34228	99.484	0.515963	0.826319	NO
TCGA-CM-6679-01A-11H-1838-13	COAD	MIR22	hsa-mir-22	chr17	-	3p	1713945	NA	loop	NA	7	NA	C	G	331	441225	0.000750184	-10.3805	0.000589921	-11.054	5.13617e-41	2.64513e-38	0.696035	0.486407	0.313	0.0749622	99.925	0.0589574	99.941	0.0160048	NO
TCGA-90-A4ED-01A-31H-A25B-13	LUSC	MIR22	hsa-mir-22	chr17	-	3p	1713996	NA	flanking-5	NA	NA	-23	G	A	141	250685	0.000562459	-10.796	0.000459437	-11.3417	1.81487e-40	9.34656e-38	0.671682	0.501786	0.299481	0.0562143	99.9438	0.0459226	99.9541	0.0102916	NO
TCGA-CJ-4912-01A-01R-1425-13	KIRC	MIR22	hsa-mir-22	chr17	-	3p	1713912	COSN2377436	flanking-3	NA	NA	2	C	A	31	74901	0.00041388	-11.2385	0.000352098	-11.6598	2.74748e-34	1.41495e-31	0.561866	0.574208	0.240931	0.0413708	99.9586	0.0351974	99.9648	0.00617345	NO
TCGA-BH-A5IZ-01A-11R-A27U-13	BRCA	MIR221	hsa-mir-221	chrX	-	3p	45746169	NA	flanking-3	NA	NA	11	C	T	1	192	0.00520833	-7.58496	0.0168314	-6.38621	1.41977e-162	7.31181e-160	-0.987762	0.323269	0.490435	0.518135	99.4819	1.65528	98.3447	1.13714	NO
TCGA-LL-A6FP-01A-11R-A31S-13	BRCA	MIR221	hsa-mir-221	chrX	-	3p	45746207	NA	loop	NA	14	NA	C	T	1	135	0.00740741	-7.07682	0.0168314	-6.38621	4.01884e-68	2.0697e-65	-0.569053	0.56932	0.244643	0.735294	99.2647	1.65528	98.3447	0.919984	NO
TCGA-FA-A86F-01A-11R-A38N-13	DLBC	MIR221	hsa-mir-221	chrX	-	3p	45746162	NA	flanking-3	NA	NA	18	C	T	29	3514	0.0082527	-6.92092	0.014492	-6.43145	0.000996592	0.513245	-0.519203	0.603619	0.219237	0.818515	99.1815	1.4285	98.5715	0.609981	NO
TCGA-3C-AALK-01A-11R-A41G-13	BRCA	MIR221	hsa-mir-221	chrX	-	3p	45746225	COSN5776032	non-seed duplex_5p	18	NA	NA	C	A	7	574	0.0121951	-6.35755	0.0168383	-6.38577	0.443944	1	0.0232497	0.981451	0.00813135	1.20482	98.7952	1.65595	98.3441	0.451129	NO
TCGA-CV-6955-01A-11R-2015-13	HNSC	MIR222	hsa-mir-222	chrX	-	3p	45747065	COSN2377957	loop	NA	8	NA	C	T	102	277	0.368231	-1.44132	0.157083	-2.95056	7.83323e-157	4.03411e-154	1.7058	0.0880449	1.0553	26.9129	73.0871	13.5758	86.4242	13.3372	NO
TCGA-C8-A26Y-01A-11R-A16E-13	BRCA	MIR222	hsa-mir-222	chrX	-	3p	45747060	COSN23017634	loop	NA	13	NA	G	A	18	131	0.137405	-2.8635	0.0938393	-3.59293	3.0533e-151	1.57245e-148	0.981375	0.326408	0.48624	12.0805	87.9195	8.57889	91.4211	3.50165	NO
TCGA-B0-5096-01A-01R-1419-13	KIRC	MIR222	hsa-mir-222	chrX	-	3p	45747065	COSN2377957	loop	NA	8	NA	C	T	22	554	0.0397112	-4.65431	0.0738011	-3.96649	3.44932e-67	1.7764e-64	-0.880769	0.378443	0.421999	3.81944	96.1806	6.87289	93.1271	3.05344	NO
TCGA-C5-A2LT-01A-11R-A18L-13	CESC	MIR222	hsa-mir-222	chrX	-	3p	45747065	COSN2377957	loop	NA	8	NA	C	T	276	2202	0.125341	-2.99607	0.106375	-3.45081	1.07318e-19	5.5269e-17	0.558896	0.576233	0.239402	11.138	88.862	9.61474	90.3853	1.52327	NO
TCGA-MA-AA42-01A-12R-A38M-13	CESC	MIR222	hsa-mir-222	chrX	-	3p	45747066	NA	loop	NA	7	NA	G	A	185	1664	0.111178	-3.16906	0.106375	-3.45081	4.56444e-09	2.35068e-06	0.346289	0.729125	0.137198	10.0054	89.9946	9.61474	90.3853	0.390667	NO
TCGA-66-2754-01A-01T-0981-13	LUSC	MIR223	hsa-mir-223	chrX	+	3p	66018930	COSM757840	loop	NA	14	NA	G	A	3	57	0.0526316	-4.24793	0.0095537	-7.10968	3.75663e-222	1.93466e-219	2.72491	0.00643186	2.19166	5	95	0.946329	99.0537	4.05367	NO
TCGA-DI-A2QU-01A-11R-A18L-13	UCEC	MIR223	hsa-mir-223	chrX	+	3p	66018892	NA	flanking-5	NA	NA	-3	C	A	1	546	0.0018315	-9.09276	0.0132297	-6.65284	4.90638e-205	2.52679e-202	-2.17806	0.0294014	1.53163	0.182815	99.8172	1.30569	98.6943	1.12288	NO
TCGA-D9-A3Z4-01A-11R-A23A-13	SKCM	MIR223	hsa-mir-223	chrX	+	3p	66018915	COSM3562771	non-seed duplex_5p	21	NA	NA	T	C	3	734	0.00408719	-7.93467	0.00928485	-7.09841	4.13132e-53	2.12763e-50	-0.833238	0.40471	0.392856	0.407056	99.5929	0.919944	99.0801	0.512888	NO
TCGA-NC-A5HR-01A-21H-A26V-13	LUSC	MIR223	hsa-mir-223	chrX	+	3p	66018971	NA	flanking-3	NA	NA	13	G	T	28	5902	0.00474415	-7.71963	0.0095537	-7.10968	6.66724e-32	3.43363e-29	-0.580791	0.561381	0.250742	0.472175	99.5278	0.946329	99.0537	0.474154	NO
TCGA-2G-AAGZ-01A-11R-A439-13	TGCT	MIR223	hsa-mir-223	chrX	+	3p	66018968	NA	flanking-3	NA	NA	10	C	G	36	3604	0.0099889	-6.64546	0.010298	-6.80293	0.0116073	1	0.205175	0.837436	0.0770485	0.989011	99.011	1.01931	98.9807	0.0302957	NO
TCGA-AA-3864-01A-01T-1021-13	COAD	MIR223	hsa-mir-223	chrX	+	3p	66018886	NA	flanking-5	NA	NA	-9	G	A	4	442	0.00904977	-6.7879	0.0123862	-6.63017	0.000331219	0.170578	-0.169388	0.865491	0.0627374	0.896861	99.1031	1.22347	98.7765	0.326606	NO
TCGA-GK-A6C7-01A-11R-A33A-13	KIRC	MIR224	hsa-mir-224	chrX	-	5p	151958656	NA	flanking-5	NA	NA	-4	C	A	158	33	4.78788	2.25939	9.07595	2.73641	1.60439e-16	8.26259e-14	-0.449028	0.653411	0.184813	82.7225	17.2775	90.0754	9.92463	7.35286	NO
TCGA-DX-A23Y-01A-11R-A27U-13	SARC	MIR2355	hsa-mir-2355	chr2	-	both	207109977	NA	flanking-3	NA	NA	22	G	A	126	5	25.2	4.65535	9.90399	3.07856	2.98328e-87	1.53639e-84	2.04706	0.0406524	1.39091	96.1832	3.81679	90.829	9.17095	5.35416	NO
TCGA-EY-A1GO-01A-11R-A14C-13	UCEC	MIR2355	hsa-mir-2355	chr2	-	both	207110087	NA	flanking-5	NA	NA	-24	C	G	325	85	3.82353	1.9349	11.6009	3.32528	1.69228e-149	8.71525e-147	-1.82722	0.0676674	1.16962	79.2683	20.7317	92.0641	7.93591	12.7958	NO
TCGA-LN-A5U5-01A-21R-A28K-13	ESCA	MIR2355	hsa-mir-2355	chr2	-	both	207109983	NA	flanking-3	NA	NA	16	T	A	189	25	7.56	2.91839	10.0704	3.15185	3.35877e-05	0.0172977	-0.328934	0.742206	0.129476	88.3178	11.6822	90.9669	9.03313	2.64911	NO
TCGA-D8-A1XQ-01A-11R-A14L-13	BRCA	MIR23A	hsa-mir-23a	chr19	-	3p	13836590	COSN23015344	flanking-3	NA	NA	5	C	T	54	36667	0.00147271	-9.40731	0.000860799	-10.5655	6.88179e-185	3.54412e-182	1.07052	0.284386	0.546091	0.147055	99.8529	0.0860058	99.914	0.061049	NO
TCGA-22-1012-01A-01T-1557-13	LUSC	MIR23A	hsa-mir-23a	chr19	-	3p	13836586	NA	flanking-3	NA	NA	9	G	C	4	8559	0.000467344	-11.0632	0.000804595	-10.6043	7.93276e-22	4.08537e-19	-0.462018	0.644068	0.191068	0.0467126	99.9533	0.0803948	99.9196	0.0336822	NO
TCGA-EY-A548-01A-11R-A27R-13	UCEC	MIR23A	hsa-mir-23a	chr19	-	3p	13836674	NA	flanking-5	NA	NA	-23	AG	A	2	2731	0.000732332	-10.4152	0.000889262	-10.4763	0.152847	1	0.0613208	0.951104	0.0217721	0.0731797	99.9268	0.0888472	99.9112	0.0156676	NO
TCGA-BC-A10X-01A-11R-A130-13	LIHC	MIR23B	hsa-mir-23b	chr9	+	3p	95085214	NA	flanking-5	NA	NA	-13	T	TGC	21	12998	0.00161563	-9.27368	0.000915419	-10.3128	4.71112e-82	2.42623e-79	1.30242	0.192774	0.714951	0.161303	99.8387	0.0914582	99.9085	0.0698445	NO
TCGA-A2-A0CR-01A-11R-A22I-13	BRCA	MIR23B	hsa-mir-23b	chr9	+	3p	95085309	NA	flanking-3	NA	NA	22	C	T	2	3554	0.000562746	-10.7952	0.00105552	-10.1811	7.81871e-90	4.02663e-87	-0.665585	0.505677	0.296127	0.056243	99.9438	0.105441	99.8946	0.0491976	NO
TCGA-04-1361-01A-01R-1565-13	OV	MIR25	hsa-mir-25	chr7	-	3p	100093637	NA	flanking-5	NA	NA	-7	A	T	8	10840	0.000738007	-10.4041	0.000300195	-12.1789	1.84042e-132	9.47815e-130	1.53299	0.125277	0.902127	0.0737463	99.9263	0.0300105	99.97	0.0437359	NO
TCGA-AX-A1C5-01A-11R-A136-13	UCEC	MIR25	hsa-mir-25	chr7	-	3p	100093626	COSN19728907	seed_5p	5	NA	NA	C	T	5	25555	0.000195656	-12.3194	8.84555e-05	-13.8666	3.35935e-133	1.73007e-130	1.42475	0.15423	0.811831	0.0195618	99.9804	0.00884477	99.9912	0.010717	NO
TCGA-DK-A1AC-01A-11R-A13X-13	BLCA	MIR25	hsa-mir-25	chr7	-	3p	100093572	COSN514173	non-seed duplex_3p	21	NA	NA	C	T	10	116006	8.62024e-05	-13.5019	6.72145e-05	-14.2489	7.10955e-38	3.66142e-35	0.698656	0.484767	0.314467	0.0086195	99.9914	0.006721	99.9933	0.0018985	NO
TCGA-L5-A4OU-01A-11R-A28K-13	ESCA	MIR25	hsa-mir-25	chr7	-	3p	100093647	NA	flanking-5	NA	NA	-17	C	T	34	256711	0.000132445	-12.8823	0.000113833	-13.6478	4.97264e-15	2.56091e-12	0.625883	0.531391	0.274585	0.0132427	99.9868	0.011382	99.9886	0.00186075	NO
TCGA-24-0975-01A-02R-1565-13	OV	MIR25	hsa-mir-25	chr7	-	3p	100093602	NA	loop	NA	8	NA	G	A	1	7472	0.000133833	-12.8673	0.000300195	-12.1789	1.53935e-34	7.92767e-32	-0.594528	0.552159	0.257936	0.0133815	99.9866	0.0300105	99.97	0.0166289	NO
TCGA-W3-A825-06A-11R-A358-13	SKCM	MIR25	hsa-mir-25	chr7	-	3p	100093565	NA	flanking-3	NA	NA	6	G	A	8	156512	5.11143e-05	-14.2559	8.30286e-05	-14.0262	2.49605e-05	0.0128547	-0.201028	0.840676	0.0753711	0.00511117	99.9949	0.00830217	99.9917	0.003191	NO
TCGA-EW-A1PC-01B-11R-A21U-13	BRCA	MIR25	hsa-mir-25	chr7	-	3p	100093640	NA	flanking-5	NA	NA	-10	G	T	2	36656	5.45613e-05	-14.1618	7.77876e-05	-14.0358	8.76646e-05	0.0451473	-0.118599	0.905593	0.0430669	0.00545584	99.9945	0.00777815	99.9922	0.00232232	NO
TCGA-DI-A0WH-01A-12R-A12H-13	UCEC	MIR27A	hsa-mir-27a	chr19	-	3p	13836448	COSN2382145	non-seed duplex_3p	20	NA	NA	C	T	127	2825	0.0449558	-4.47535	0.00890164	-7.27367	2.79784e-232	1.44089e-229	2.46059	0.0138707	1.8579	4.30217	95.6978	0.88231	99.1177	3.41986	NO
TCGA-BR-8360-01A-11R-2343-13	STAD	MIR27A	hsa-mir-27a	chr19	-	3p	13836441	NA	flanking-3	NA	NA	6	TG	T	14	3367	0.004158	-7.90989	0.0142976	-6.53587	2.53197e-95	1.30397e-92	-1.27579	0.202031	0.694582	0.414079	99.5859	1.4096	98.5904	0.995525	NO
TCGA-B5-A1MW-01A-11R-A17A-13	UCEC	MIR27A	hsa-mir-27a	chr19	-	3p	13836523	NA	flanking-5	NA	NA	-15	G	A	49	3566	0.0137409	-6.18538	0.00890759	-7.27269	1.49481e-78	7.69826e-76	0.956115	0.339014	0.469782	1.35546	98.6445	0.882895	99.1171	0.472569	NO
TCGA-AB-2935-03A-01T-0740-13	LAML	MIR27A	hsa-mir-27a	chr19	-	3p	13836478	NA	loop	NA	9	NA	T	C	145	4432	0.0327166	-4.93383	0.0317313	-5.36404	0.365268	1	0.643598	0.5199	0.28408	3.16801	96.832	3.07554	96.9245	0.0924782	NO
TCGA-AB-2840-03A-01T-0734-13	LAML	MIR27A	hsa-mir-27a	chr19	-	3p	13836478	NA	loop	NA	9	NA	T	C	48	1053	0.045584	-4.45533	0.0317313	-5.36404	0.365268	1	0.643598	0.5199	0.28408	4.35967	95.6403	3.07554	96.9245	1.28414	NO
TCGA-AJ-A8CW-01A-11R-A37P-13	UCEC	MIR27A	hsa-mir-27a	chr19	-	3p	13836441	NA	flanking-3	NA	NA	6	TG	T	54	5689	0.009492	-6.71907	0.00890759	-7.27269	6.55676e-27	3.37673e-24	0.486821	0.626385	0.203158	0.940275	99.0597	0.882895	99.1171	0.0573806	NO
TCGA-S9-A6TU-01A-12R-A360-13	LGG	MIR27A	hsa-mir-27a	chr19	-	3p	13836513	NA	flanking-5	NA	NA	-5	C	T	14	4052	0.00345508	-8.17706	0.00640817	-7.68533	2.12492e-23	1.09433e-20	-0.454787	0.649263	0.18758	0.344319	99.6557	0.636737	99.3633	0.292418	NO
TCGA-XD-AAUG-01A-61R-A41G-13	PAAD	MIR27A	hsa-mir-27a	chr19	-	3p	13836478	NA	loop	NA	9	NA	T	C	41	8522	0.00481108	-7.69942	0.00769044	-7.5212	0.0508508	1	-0.147365	0.882844	0.0541163	0.478804	99.5212	0.763175	99.2368	0.284371	NO
TCGA-AA-3710-01A-01T-1021-13	COAD	MIR28	hsa-mir-28	chr3	+	both	188688799	COSN18185224	seed_5p	6	NA	NA	G	T	179	6877	0.0260288	-5.26375	0.0212073	-5.63128	1.16096e-50	5.97892e-48	0.797405	0.425216	0.371391	2.53685	97.4632	2.07668	97.9233	0.460164	NO
TCGA-EE-A2M5-06A-12R-A18V-13	SKCM	MIR296	hsa-mir-296	chr20	-	both	58817682	COSN5028281	flanking-5	NA	NA	-1	C	T	36	42	0.857143	-0.222392	2.65341	0.96256	6.59429e-70	3.39606e-67	-1.32848	0.18402	0.735136	46.1538	53.8462	72.6283	27.3717	26.4744	NO
TCGA-69-7979-01A-11H-2186-13	LUAD	MIR296	hsa-mir-296	chr20	-	both	58817665	COSN24410955	non-seed duplex_5p	17	NA	NA	G	A	78	22	3.54545	1.82597	7.31807	2.15939	0.00387809	1	-0.288293	0.773123	0.111752	78	22	87.978	12.022	9.97799	NO
TCGA-ER-A42L-06A-11R-A24Y-13	SKCM	MIR29A	hsa-mir-29a	chr7	-	3p	130876820	NA	flanking-5	NA	NA	-13	G	A	24	14232	0.00168634	-9.21189	0.0010782	-10.27	6.17085e-58	3.17799e-55	0.882141	0.377701	0.422852	0.16835	99.8316	0.107704	99.8923	0.060646	NO
TCGA-AA-3492-01A-01T-1409-13	COAD	MIR29A	hsa-mir-29a	chr7	-	3p	130876729	NA	flanking-3	NA	NA	19	T	C	55	20291	0.00271056	-8.52719	0.00196325	-9.53027	2.77545e-47	1.42936e-44	0.762318	0.44587	0.350791	0.270323	99.7297	0.195941	99.8041	0.0743827	NO
TCGA-D3-A8GN-06A-11R-A37G-13	SKCM	MIR29A	hsa-mir-29a	chr7	-	3p	130876738	NA	flanking-3	NA	NA	10	C	T	85	60412	0.00140701	-9.47316	0.0010782	-10.27	1.90747e-37	9.82345e-35	0.664332	0.506478	0.29544	0.140503	99.8595	0.107704	99.8923	0.0327987	NO
TCGA-22-4609-01A-21H-2124-13	LUSC	MIR29A	hsa-mir-29a	chr7	-	3p	130876745	NA	flanking-3	NA	NA	3	T	C	35	37625	0.000930233	-10.0701	0.00151219	-9.60481	2.92073e-26	1.50418e-23	-0.523294	0.60077	0.221292	0.0929368	99.9071	0.150991	99.849	0.0580541	NO
TCGA-BT-A3PH-01A-11R-A222-13	BLCA	MIR29A	hsa-mir-29a	chr7	-	3p	130876827	NA	flanking-5	NA	NA	-20	G	C	7	6080	0.00115132	-9.7625	0.00112921	-10.1069	1.32999e-11	6.84945e-09	0.340839	0.733225	0.134763	0.114999	99.885	0.112793	99.8872	0.00220574	NO
TCGA-PK-A5HB-01A-11R-A29W-13	ACC	MIR29C	hsa-mir-29c	chr1	-	3p	207801845	NA	flanking-3	NA	NA	20	C	T	226	7472	0.0302463	-5.0471	0.0339219	-5.10948	0.499585	1	0.0763155	0.939168	0.0272567	2.93583	97.0642	3.2809	96.7191	0.34507	NO
TCGA-Q1-A6DW-01A-11R-A32K-13	CESC	MIR301A	hsa-mir-301a	chr17	-	3p	59151171	COSN16132402	non-seed duplex_3p	1	NA	NA	G	A	75	84	0.892857	-0.163499	0.413896	-1.42431	2.44359e-66	1.25845e-63	1.88688	0.0591763	1.22785	47.1698	52.8302	29.2734	70.7266	17.8964	NO
TCGA-E9-A1RF-01A-11R-A156-13	BRCA	MIR301A	hsa-mir-301a	chr17	-	3p	59151212	COSN23015194	flanking-5	NA	NA	-4	C	T	95	70	1.35714	0.440573	0.664731	-0.790792	1.77121e-118	9.12171e-116	1.53848	0.123932	0.906817	57.5758	42.4242	39.9302	60.0698	17.6455	NO
TCGA-L4-A4E5-01A-11H-A24S-13	LUAD	MIR301A	hsa-mir-301a	chr17	-	3p	59151127	NA	flanking-3	NA	NA	22	G	T	35	80	0.4375	-1.19265	0.562011	-1.05709	0.00498494	1	-0.16445	0.869377	0.0607917	30.4348	69.5652	35.98	64.02	5.54518	NO
TCGA-A4-A5Y0-01A-11R-A31S-13	KIRP	MIR3065	hsa-mir-3065	chr17	+	5p	81125863	NA	flanking-5	NA	NA	-23	C	G	5	104	0.0480769	-4.37851	0.0530522	-4.42914	0.348442	1	0.0676566	0.946059	0.0240818	4.58716	95.4128	5.03794	94.9621	0.450786	NO
TCGA-AD-6889-01A-11H-1927-13	COAD	MIR30A	hsa-mir-30a	chr6	-	5p	71403531	NA	flanking-3	NA	NA	23	C	A	7519	1880	3.99947	1.99981	2.8932	1.42628	1.64902e-73	8.49245e-71	1.03257	0.301803	0.520276	79.9979	20.0021	74.3142	25.6858	5.68369	NO
TCGA-CV-7568-01A-11R-2231-13	HNSC	MIR30A	hsa-mir-30a	chr6	-	5p	71403578	NA	loop	NA	17	NA	C	T	26325	10865	2.42292	1.27675	3.16973	1.55779	7.54861e-27	3.88753e-24	-0.49643	0.619591	0.207895	70.7852	29.2148	76.0177	23.9823	5.2325	NO
TCGA-DM-A0XF-01A-11H-A154-13	COAD	MIR30A	hsa-mir-30a	chr6	-	5p	71403581	NA	loop	NA	14	NA	C	T	24354	8481	2.8716	1.52185	2.8932	1.42628	0.000275213	0.141734	0.17207	0.863382	0.0637969	74.1709	25.8291	74.3142	25.6858	0.143329	NO
TCGA-BA-4076-01A-01T-1435-13	HNSC	MIR30A	hsa-mir-30a	chr6	-	5p	71403620	NA	flanking-5	NA	NA	-4	G	C	5506	1891	2.91169	1.54186	3.16973	1.55779	0.520101	1	-0.0281438	0.977547	0.00986214	74.4356	25.5644	76.0177	23.9823	1.58207	NO
TCGA-D8-A27V-01A-12R-A17A-13	BRCA	MIR30B	hsa-mir-30b	chr8	-	5p	134800551	COSN23017168	seed_3p	3	NA	NA	C	T	2676	67	39.9403	5.31977	149.51	6.93747	0	0	-1.80423	0.0711949	1.14755	97.5574	2.44258	99.3356	0.664408	1.77817	NO
TCGA-66-2780-01A-01T-1557-13	LUSC	MIR30B	hsa-mir-30b	chr8	-	5p	134800559	NA	loop	NA	11	NA	C	G	624	4	156	7.2854	154.622	7.00732	1.2929e-11	6.65843e-09	0.317736	0.750685	0.124542	99.3631	0.636943	99.3574	0.642584	0.00564119	NO
TCGA-CK-5916-01A-11H-1652-13	COAD	MIR30D	hsa-mir-30d	chr8	-	5p	134804874	NA	flanking-3	NA	NA	5	C	T	24372	17	1433.65	10.4855	1052.34	9.81601	2.3704e-57	1.22075e-54	0.865986	0.386498	0.412853	99.9303	0.0697036	99.9051	0.0949362	0.0252326	NO
TCGA-MV-A51V-01A-11R-A26X-13	BLCA	MIR30D	hsa-mir-30d	chr8	-	5p	134804855	NA	flanking-3	NA	NA	24	G	C	51082	48	1064.21	10.0556	933.647	9.72718	8.94967e-23	4.60908e-20	0.511359	0.6091	0.215312	99.9061	0.0938783	99.893	0.106992	0.0131139	NO
TCGA-64-5781-01A-01T-1627-13	LUAD	MIR30D	hsa-mir-30d	chr8	-	5p	134804916	COSN24409198	loop	NA	3	NA	C	A	52025	54	963.426	9.91203	1102.6	9.98732	0.00317618	1	-0.12998	0.896582	0.0474099	99.8963	0.103689	99.9094	0.0906128	0.0130758	NO
TCGA-67-3771-01A-01T-0947-13	LUAD	MIR30E	hsa-mir-30e	chr1	+	5p	40754357	NA	flanking-5	NA	NA	-14	G	A	37915	12913	2.93619	1.55394	0.991641	-0.222412	1.06412e-206	5.4802e-204	2.26529	0.0234951	1.62902	74.5947	25.4053	49.7902	50.2098	24.8046	NO
TCGA-D6-A6EO-01A-11R-A31R-13	HNSC	MIR30E	hsa-mir-30e	chr1	+	5p	40754408	NA	loop	NA	16	NA	A	T	18324	39506	0.463828	-1.10834	0.711708	-0.651316	6.99319e-45	3.60149e-42	-0.677289	0.498223	0.302577	31.686	68.314	41.5788	58.4212	9.89283	NO
TCGA-BR-4201-01A-01R-1131-13	STAD	MIR30E	hsa-mir-30e	chr1	+	5p	40754448	NA	flanking-3	NA	NA	14	G	A	10454	12663	0.825555	-0.276564	0.780286	-0.444822	3.95899e-11	2.03888e-08	0.321557	0.747788	0.126221	45.2221	54.7779	43.8293	56.1707	1.39287	NO
TCGA-D1-A17M-01A-21R-A12H-13	UCEC	MIR32	hsa-mir-32	chr9	-	5p	109046215	NA	flanking-3	NA	NA	16	G	A	92	9	10.2222	3.35364	21.8625	4.17119	8.65201e-68	4.45579e-65	-0.927932	0.353443	0.451681	91.0891	8.91089	95.626	4.37398	4.53692	NO
TCGA-37-3792-01A-01T-0981-13	LUSC	MIR32	hsa-mir-32	chr9	-	5p	109046214	NA	flanking-3	NA	NA	17	T	A	67	3	22.3333	4.48113	28.8236	4.63188	0.000145862	0.075119	-0.193737	0.846382	0.0724337	95.7143	4.28571	96.6469	3.35305	0.932663	NO
TCGA-VS-A959-01A-11R-A42V-13	CESC	MIR320A	hsa-mir-320a	chr8	-	3p	22244961	NA	flanking-3	NA	NA	14	C	T	4	2030	0.00197044	-8.98726	0.000663606	-10.9794	2.66668e-95	1.37334e-92	1.74443	0.0810834	1.09107	0.196657	99.8033	0.0663166	99.9337	0.13034	NO
TCGA-66-2795-01A-02T-0981-13	LUSC	MIR320A	hsa-mir-320a	chr8	-	3p	22244987	COSN2378943	non-seed duplex_3p	10	NA	NA	C	T	1	221	0.00452489	-7.7879	0.00157164	-9.99414	4.48136e-139	2.3079e-136	1.66365	0.0961821	1.01691	0.45045	99.5495	0.156918	99.8431	0.293533	NO
TCGA-EE-A2A2-06A-11R-A18W-13	SKCM	MIR320A	hsa-mir-320a	chr8	-	3p	22245033	NA	flanking-5	NA	NA	-5	G	A	5	73880	6.76773e-05	-13.851	0.000453412	-11.6925	1.57483e-125	8.11035e-123	-1.60052	0.109484	0.960651	0.00676727	99.9932	0.0453207	99.9547	0.0385534	NO
TCGA-D1-A15X-01A-11R-A119-13	UCEC	MIR320A	hsa-mir-320a	chr8	-	3p	22244960	NA	flanking-3	NA	NA	15	T	C	2	1213	0.0016488	-9.24436	0.000705079	-11.1764	8.36402e-131	4.30747e-128	1.40327	0.160537	0.794424	0.164609	99.8354	0.0704582	99.9295	0.0941508	NO
TCGA-DQ-5624-01A-01R-1872-13	HNSC	MIR320A	hsa-mir-320a	chr8	-	3p	22244987	COSN2378943	non-seed duplex_3p	10	NA	NA	C	T	4	2324	0.00172117	-9.18239	0.000808635	-10.7872	6.92342e-116	3.56556e-113	1.31171	0.189619	0.722118	0.171821	99.8282	0.0807981	99.9192	0.0910232	NO
TCGA-21-1079-01A-01T-1557-13	LUSC	MIR320A	hsa-mir-320a	chr8	-	3p	22245034	NA	flanking-5	NA	NA	-6	G	A	1	2438	0.000410172	-11.2515	0.00157199	-9.99382	2.84073e-68	1.46298e-65	-0.948337	0.342958	0.464759	0.0410004	99.959	0.156952	99.843	0.115952	NO
TCGA-BT-A20N-01A-11R-A14X-13	BLCA	MIR320A	hsa-mir-320a	chr8	-	3p	22245021	COSN2376802	seed_5p	8	NA	NA	G	A	1	3338	0.000299581	-11.7048	0.000674191	-11.1591	2.91401e-17	1.50072e-14	-0.433049	0.664979	0.177192	0.0299491	99.9701	0.0673737	99.9326	0.0374246	NO
TCGA-D8-A1JE-01A-11R-A13P-13	BRCA	MIR320A	hsa-mir-320a	chr8	-	3p	22245044	NA	flanking-5	NA	NA	-16	G	T	2	1954	0.00102354	-9.93221	0.00107664	-10.3639	2.22771e-30	1.14727e-27	0.355683	0.722078	0.141416	0.102249	99.8978	0.107548	99.8925	0.00529874	NO
TCGA-AA-3663-01A-01T-1722-13	COAD	MIR320A	hsa-mir-320a	chr8	-	3p	22244970	COSN23013034	flanking-3	NA	NA	5	CT	C	1	1090	0.000917431	-10.0901	0.00234903	-9.83258	0.00162218	0.835421	-0.149156	0.881431	0.0548119	0.091659	99.9083	0.234353	99.7656	0.142694	NO
TCGA-55-8089-01A-11H-2240-13	LUAD	MIR320A	hsa-mir-320a	chr8	-	3p	22244987	COSN24411655	non-seed duplex_3p	10	NA	NA	C	A	2	1995	0.00100251	-9.96217	0.00141116	-10.0743	0.0396809	1	0.0905232	0.927871	0.0325122	0.10015	99.8998	0.140917	99.8591	0.0407672	NO
TCGA-4Z-AA7M-01A-11R-A39B-13	BLCA	MIR320A	hsa-mir-320a	chr8	-	3p	22245004	NA	loop	NA	3	NA	C	T	1	2240	0.000446429	-11.1293	0.000673793	-11.1615	0.602987	1	0.02552	0.97964	0.00893341	0.0446229	99.9554	0.0673339	99.9327	0.022711	NO
TCGA-HT-7476-01A-11R-2026-13	LGG	MIR323A	hsa-mir-323a	chr14	+	3p	101025761	COSN20052415	non-seed duplex_5p	15	NA	NA	G	A	64	2308	0.0277296	-5.17243	0.0456487	-4.68098	1.06619e-30	5.4909e-28	-0.586041	0.557848	0.253484	2.69815	97.3019	4.36559	95.6344	1.66745	NO
TCGA-CU-A0YO-01A-11R-A10V-13	BLCA	MIR323A	hsa-mir-323a	chr14	+	3p	101025781	COSN2376693	loop	1	NA	NA	G	A	1	58	0.0172414	-5.85798	0.0253945	-5.54191	0.0317744	1	-0.37854	0.705029	0.151793	1.69492	98.3051	2.47656	97.5234	0.781645	NO
TCGA-FS-A1Z3-06A-11R-A18W-13	SKCM	MIR323B	hsa-mir-323b	chr14	+	3p	101056217	NA	flanking-5	NA	NA	-16	C	T	1	54	0.0185185	-5.75489	0.0135588	-6.51571	4.42518e-07	0.000227897	0.732803	0.463679	0.333783	1.81818	98.1818	1.33775	98.6623	0.480435	NO
TCGA-ER-A19K-01A-21R-A18W-13	SKCM	MIR323B	hsa-mir-323b	chr14	+	3p	101056227	COSN5026513	flanking-5	NA	NA	-6	G	A	1	56	0.0178571	-5.80735	0.0135588	-6.51571	1.91428e-06	0.000985853	0.682267	0.49507	0.305333	1.75439	98.2456	1.33775	98.6623	0.416639	NO
TCGA-AP-A5FX-01A-11R-A27R-13	UCEC	MIR324	hsa-mir-324	chr17	-	both	7223295	NA	flanking-3	NA	NA	13	C	T	236	110	2.14545	1.10128	0.938015	-0.260844	5.89049e-174	3.0336e-171	1.84905	0.0644501	1.19078	68.2081	31.7919	48.4008	51.5992	19.8073	NO
TCGA-A5-A0GW-01A-11R-A041-13	UCEC	MIR324	hsa-mir-324	chr17	-	both	7223290	NA	flanking-3	NA	NA	18	C	T	142	82	1.73171	0.792195	0.938015	-0.260844	8.04869e-131	4.14507e-128	1.42947	0.152868	0.815683	63.3929	36.6071	48.4008	51.5992	14.992	NO
TCGA-BS-A0U8-01A-11R-A103-13	UCEC	MIR328	hsa-mir-328	chr16	-	3p	67202382	COSN23014987	seed_5p	8	NA	NA	G	GC	1	73	0.0136986	-6.18982	0.00575191	-7.84805	5.3376e-136	2.74886e-133	1.49165	0.13579	0.867131	1.35135	98.6486	0.571902	99.4281	0.77945	NO
TCGA-ZF-A9RC-01A-11R-A38M-13	BLCA	MIR328	hsa-mir-328	chr16	-	3p	67202402	NA	flanking-5	NA	NA	-13	G	C	1	267	0.00374532	-8.0607	0.00802223	-7.24832	8.14237e-46	4.19332e-43	-0.841157	0.40026	0.397658	0.373134	99.6269	0.795838	99.2042	0.422704	NO
TCGA-D3-A3C8-06A-12R-A18V-13	SKCM	MIR328	hsa-mir-328	chr16	-	3p	67202413	NA	flanking-5	NA	NA	-24	G	A	2	626	0.00319489	-8.29002	0.00228278	-9.23827	1.28166e-51	6.60053e-49	0.818796	0.412903	0.384152	0.318471	99.6815	0.227758	99.7722	0.090713	NO
TCGA-F4-6570-01A-11H-1773-13	COAD	MIR328	hsa-mir-328	chr16	-	3p	67202382	COSN23012614	seed_5p	8	NA	NA	GC	G	1	126	0.00793651	-6.97728	0.0119097	-6.57147	4.51127e-17	2.3233e-14	-0.54827	0.583506	0.233954	0.787402	99.2126	1.17695	98.823	0.38955	NO
TCGA-CG-5717-01A-11R-1602-13	STAD	MIR328	hsa-mir-328	chr16	-	3p	67202362	NA	loop	NA	5	NA	T	G	1	123	0.00813008	-6.94251	0.0106864	-6.80363	0.00891683	1	-0.150719	0.880198	0.0554198	0.806452	99.1935	1.05734	98.9427	0.250885	NO
TCGA-DR-A0ZM-01A-12R-A10V-13	CESC	MIR328	hsa-mir-328	chr16	-	3p	67202338	COSN2376590	non-seed duplex_3p	11	NA	NA	G	A	1	119	0.00840336	-6.89482	0.00934333	-6.95727	0.202847	1	0.0775468	0.938189	0.0277099	0.833333	99.1667	0.925684	99.0743	0.0923505	NO
TCGA-B4-5844-01A-11R-1671-13	KIRC	MIR328	hsa-mir-328	chr16	-	3p	67202381	COSN525546	non-seed duplex_5p	9	NA	NA	T	C	1	251	0.00398406	-7.97154	0.00499741	-7.91241	0.116811	1	-0.0675973	0.946106	0.0240601	0.396825	99.6032	0.497256	99.5027	0.10043	NO
TCGA-O2-A52Q-01A-11H-A26V-13	LUSC	MIR328	hsa-mir-328	chr16	-	3p	67202402	NA	flanking-5	NA	NA	-13	G	C	1	171	0.00584795	-7.41785	0.00708909	-7.43325	0.733296	1	0.0161995	0.987075	0.00564973	0.581395	99.4186	0.703919	99.2961	0.122524	NO
TCGA-K4-A54R-01A-11R-A26X-13	BLCA	MIR330	hsa-mir-330	chr19	-	3p	45638999	NA	flanking-3	NA	NA	10	G	A	403	18	22.3889	4.48471	43.6166	5.08081	1.57782e-28	8.12575e-26	-0.595553	0.551474	0.258475	95.7245	4.27553	97.7587	2.24132	2.03422	NO
TCGA-D1-A16J-01A-11R-A12H-13	UCEC	MIR330	hsa-mir-330	chr19	-	3p	45639012	COSN498826	non-seed duplex_3p	20	NA	NA	C	T	150	5	30	4.90689	46.0272	5.19145	4.24448e-09	2.18591e-06	-0.283474	0.776813	0.109683	96.7742	3.22581	97.8736	2.12643	1.09938	NO
TCGA-CV-7089-01A-11R-2015-13	HNSC	MIR330	hsa-mir-330	chr19	-	3p	45639012	COSN498826	non-seed duplex_3p	20	NA	NA	C	T	336	7	48	5.58496	57.2529	5.34756	5.60628e-06	0.00288724	0.204453	0.837999	0.0767564	97.9592	2.04082	98.2833	1.71665	0.324163	NO
TCGA-DK-A3X1-01A-12R-A22V-13	BLCA	MIR330	hsa-mir-330	chr19	-	3p	45639038	NA	loop	NA	11	NA	G	A	153	5	30.6	4.93546	43.6166	5.08081	0.00366759	1	-0.14522	0.884537	0.0532838	96.8354	3.16456	97.7587	2.24132	0.923238	NO
TCGA-MT-A67F-01A-11R-A30I-13	HNSC	MIR331	hsa-mir-331	chr12	+	3p	95308469	NA	loop	NA	3	NA	G	A	28	129	0.217054	-2.20387	0.199899	-2.46044	6.60371e-18	3.40091e-15	0.396348	0.691848	0.159989	17.8344	82.1656	16.6596	83.3404	1.17478	NO
TCGA-DA-A95V-06A-11R-A37G-13	SKCM	MIR331	hsa-mir-331	chr12	+	3p	95308515	NA	flanking-3	NA	NA	15	C	T	7	46	0.152174	-2.71621	0.164986	-2.8851	8.68978e-05	0.0447523	0.196514	0.844208	0.0735508	13.2075	86.7925	14.1621	85.8379	0.954509	NO
TCGA-D3-A8GO-06A-11R-A37G-13	SKCM	MIR335	hsa-mir-335	chr7	+	5p	130496140	COSN23016863	non-seed duplex_5p	15	NA	NA	G	A	337	7231	0.0466049	-4.42337	0.0792269	-4.00934	9.93692e-12	5.11751e-09	-0.415153	0.67803	0.168751	4.45296	95.547	7.34108	92.6589	2.88812	NO
TCGA-AX-A2IN-01A-12R-A17X-13	UCEC	MIR335	hsa-mir-335	chr7	+	5p	130496154	NA	loop	NA	6	NA	A	G	229	1072	0.213619	-2.22689	0.241523	-2.4513	7.83134e-06	0.00403314	0.194235	0.845992	0.0726337	17.6018	82.3982	19.4538	80.5462	1.85195	NO
TCGA-D1-A17D-01A-12R-A12H-13	UCEC	MIR337	hsa-mir-337	chr14	+	both	100874505	NA	flanking-5	NA	NA	-10	TG	T	3	176	0.0170455	-5.87447	0.0155688	-6.31635	5.70423e-16	2.93768e-13	0.465291	0.641723	0.192652	1.67598	98.324	1.53302	98.467	0.142961	NO
TCGA-G4-6628-01A-11H-1838-13	COAD	MIR337	hsa-mir-337	chr14	+	both	100874507	NA	flanking-5	NA	NA	-8	G	T	2	89	0.0224719	-5.47573	0.0232343	-5.71092	1.08758e-05	0.00560103	0.25573	0.798159	0.0979106	2.1978	97.8022	2.27067	97.7293	0.0728726	NO
TCGA-A4-A5Y0-01A-11R-A31S-13	KIRP	MIR338	hsa-mir-338	chr17	-	both	81125863	NA	flanking-3	NA	NA	24	C	G	8	547	0.0146252	-6.0954	0.0152257	-6.27647	0.000510092	0.262697	0.206415	0.836467	0.0775514	1.44144	98.5586	1.49973	98.5003	0.0582927	NO
TCGA-AA-3864-01A-01T-1021-13	COAD	MIR33A	hsa-mir-33a	chr22	+	5p	41901029	NA	flanking-3	NA	NA	19	C	T	101	3	33.6667	5.07325	27.1727	4.41538	1.67041e-31	8.60259e-29	0.648562	0.516622	0.286827	97.1154	2.88462	96.4505	3.54954	0.664926	NO
TCGA-A6-6653-01A-11H-1773-13	COAD	MIR340	hsa-mir-340	chr5	-	5p	180015338	COSN20188985	seed_3p	3	NA	NA	G	A	90	55	1.63636	0.710493	4.7057	1.82738	1.80643e-37	9.30312e-35	-0.942925	0.345719	0.461276	62.069	37.931	82.4737	17.5263	20.4047	NO
TCGA-78-7536-01A-11H-2065-13	LUAD	MIR340	hsa-mir-340	chr5	-	5p	180015350	COSN24411365	loop	NA	11	NA	C	T	340	60	5.66667	2.5025	4.11215	1.52948	4.32041e-54	2.22501e-51	0.843475	0.398963	0.399068	85	15	80.4388	19.5612	4.56124	NO
TCGA-AJ-A23N-01A-11R-A22I-13	UCEC	MIR340	hsa-mir-340	chr5	-	5p	180015400	NA	flanking-5	NA	NA	-18	G	A	151	76	1.98684	0.990477	1.89996	0.603004	3.6137e-15	1.86105e-12	0.396247	0.691923	0.159942	66.5198	33.4802	65.5168	34.4832	1.00305	NO
TCGA-FR-A8YC-06A-11R-A37G-13	SKCM	MIR342	hsa-mir-342	chr14	+	3p	100109729	COSN1080961	non-seed duplex_3p	15	NA	NA	C	T	27	2958	0.00912779	-6.77552	0.0642724	-4.04008	0.3878	1	-3.26221	0.001106	2.95624	0.904523	99.0955	6.03909	93.9609	5.13457	NO
TCGA-D9-A149-06A-11R-A18V-13	SKCM	MIR342	hsa-mir-342	chr14	+	3p	100109729	COSN1080961	non-seed duplex_3p	15	NA	NA	C	T	171	3941	0.04339	-4.52649	0.0642724	-4.04008	0.3878	1	-3.26221	0.001106	2.95624	4.15856	95.8414	6.03909	93.9609	1.88053	NO
TCGA-FP-A4BE-01A-12R-A24L-13	STAD	MIR342	hsa-mir-342	chr14	+	3p	100109746	NA	flanking-3	NA	NA	9	C	T	27	265	0.101887	-3.29496	0.0652155	-4.09199	8.62262e-81	4.44065e-78	1.13412	0.256744	0.590499	9.24658	90.7534	6.12228	93.8777	3.1243	NO
TCGA-90-A4ED-01A-31H-A25B-13	LUSC	MIR342	hsa-mir-342	chr14	+	3p	100109708	NA	loop	NA	15	NA	G	A	48	1394	0.0344333	-4.86005	0.061388	-4.17443	1.45283e-78	7.48208e-76	-1.04784	0.294713	0.530601	3.32871	96.6713	5.78374	94.2163	2.45503	NO
TCGA-HZ-8636-01A-21R-2401-13	PAAD	MIR342	hsa-mir-342	chr14	+	3p	100109659	NA	flanking-5	NA	NA	-14	C	T	36	445	0.0808989	-3.62774	0.0683209	-3.97853	3.07796e-14	1.58515e-11	0.619956	0.535287	0.271414	7.48441	92.5156	6.39516	93.6048	1.08924	NO
TCGA-D8-A142-01A-11R-A114-13	BRCA	MIR342	hsa-mir-342	chr14	+	3p	100109710	COSN23014460	loop	NA	17	NA	A	G	18	196	0.0918367	-3.44478	0.083121	-3.71214	9.58888e-44	4.93827e-41	0.437083	0.662051	0.179108	8.41121	91.5888	7.67421	92.3258	0.737007	NO
TCGA-G4-6315-01A-11H-1722-13	COAD	MIR345	hsa-mir-345	chr14	+	5p	100307851	NA	flanking-5	NA	NA	-25	A	C	136	5	27.2	4.76553	33.3469	4.62049	0.023934	1	0.134485	0.893019	0.0491394	96.4539	3.5461	97.0885	2.91147	0.634629	NO
TCGA-EE-A29P-06A-11R-A18W-13	SKCM	MIR34A	hsa-mir-34a	chr1	-	5p	9151778	NA	flanking-5	NA	NA	-22	G	A	2278	2	1139	10.1536	205.073	7.37531	8.72626e-223	4.49402e-220	2.96507	0.00302617	2.51911	99.9123	0.0877193	99.5147	0.485266	0.397547	NO
TCGA-64-1678-01A-01T-0947-13	LUAD	MIR34A	hsa-mir-34a	chr1	-	5p	9151671	NA	flanking-3	NA	NA	22	C	T	96	2	48	5.58496	164.738	7.16697	3.76836e-199	1.9407e-196	-2.18035	0.0292319	1.53414	97.9592	2.04082	99.3966	0.603364	1.43745	NO
TCGA-JX-A3Q0-01A-11R-A21U-13	CESC	MIR34A	hsa-mir-34a	chr1	-	5p	9151691	COSN16128430	flanking-3	NA	NA	2	C	G	251	1	251	7.97154	127.673	6.82343	5.58653e-91	2.87706e-88	1.67521	0.093894	1.02736	99.6032	0.396825	99.2228	0.777166	0.380341	NO
TCGA-FD-A3B7-01A-31R-A20E-13	BLCA	MIR34A	hsa-mir-34a	chr1	-	5p	9151733	COSN513667	loop	NA	2	NA	C	T	371	5	74.2	6.21335	123.804	6.7734	1.80271e-46	9.28396e-44	-0.797362	0.425241	0.371365	98.6702	1.32979	99.1987	0.801257	0.52853	NO
TCGA-D1-A176-01A-11R-A12H-13	UCEC	MIR34C	hsa-mir-34c	chr11	+	5p	111513427	NA	flanking-5	NA	NA	-24	AT	A	442	255	1.73333	0.793549	2.53183	1.09149	2.05979e-08	1.06079e-05	-0.31897	0.749749	0.125084	63.4146	36.5854	71.686	28.314	8.2714	NO
TCGA-86-8074-01A-11H-2240-13	LUAD	MIR3605	hsa-mir-3605	chr1	-	both	33332438	NA	loop	NA	11	NA	C	A	4	49	0.0816327	-3.61471	0.0673795	-4.20364	0.0245152	1	0.624952	0.532003	0.274086	7.54717	92.4528	6.31261	93.6874	1.23456	NO
TCGA-66-2727-01A-01T-0981-13	LUSC	MIR361	hsa-mir-361	chrX	-	5p	85903616	NA	flanking-3	NA	NA	25	C	T	424	90	4.71111	2.23607	2.50949	1.14443	1.04192e-125	5.36587e-123	1.52	0.128511	0.89106	82.4903	17.5097	71.5058	28.4942	10.9844	NO
TCGA-L5-A43C-01A-11R-A24L-13	ESCA	MIR361	hsa-mir-361	chrX	-	5p	85903637	NA	flanking-3	NA	NA	4	A	G	1036	582	1.78007	0.831933	2.46535	1.16081	1.16815e-10	6.01596e-08	-0.500984	0.616382	0.21015	64.0297	35.9703	71.1429	28.8571	7.11321	NO
TCGA-22-5473-01A-01T-1634-13	LUSC	MIR361	hsa-mir-361	chrX	-	5p	85903692	COSN2378982	non-seed duplex_5p	11	NA	NA	G	A	266	142	1.87324	0.905535	2.51008	1.14474	1.52839e-12	7.87121e-10	-0.333045	0.739101	0.131296	65.1961	34.8039	71.5106	28.4894	6.31452	NO
TCGA-33-AASI-01A-22H-A404-13	LUSC	MIR362	hsa-mir-362	chrX	+	5p	50008953	NA	flanking-5	NA	NA	-15	C	G	51	40	1.275	0.350497	7.4161	2.56514	6.9423e-92	3.57528e-89	-2.39082	0.0168106	1.77442	56.044	43.956	88.118	11.882	32.0741	NO
TCGA-EE-A2MD-06A-11R-A18W-13	SKCM	MIR362	hsa-mir-362	chrX	+	5p	50008956	NA	flanking-5	NA	NA	-12	C	T	733	7	104.714	6.71031	87.7488	4.96805	3.29657e-61	1.69774e-58	0.927048	0.353902	0.451118	99.0541	0.945946	98.8732	1.12678	0.18083	NO
TCGA-D1-A16Y-01A-31R-A12H-13	UCEC	MIR363	hsa-mir-363	chrX	-	3p	134169434	COSN1085005	non-seed duplex_5p	13	NA	NA	C	T	4	192	0.0208333	-5.58496	0.00797703	-7.37726	7.77692e-116	4.00511e-113	1.58334	0.113344	0.9456	2.04082	97.9592	0.79139	99.2086	1.24943	NO
TCGA-KN-8434-01A-11R-2314-13	KICH	MIR363	hsa-mir-363	chrX	-	3p	134169420	NA	loop	NA	5	NA	C	A	1	62	0.016129	-5.9542	0.0103179	-6.75175	2.73615e-10	1.40912e-07	1.11695	0.264014	0.578373	1.5873	98.4127	1.02126	98.9787	0.566046	NO
TCGA-CV-A45P-01A-11R-A24J-13	HNSC	MIR363	hsa-mir-363	chrX	-	3p	134169360	NA	flanking-3	NA	NA	22	C	T	1	205	0.00487805	-7.67948	0.0113459	-6.74022	1.85295e-44	9.54268e-42	-0.965046	0.334522	0.475576	0.485437	99.5146	1.12186	98.8781	0.636424	NO
TCGA-CG-4460-01A-01R-1157-13	STAD	MIR363	hsa-mir-363	chrX	-	3p	134169361	NA	flanking-3	NA	NA	21	G	A	1	77	0.012987	-6.26679	0.0117263	-6.64836	5.86943e-09	3.02275e-06	0.43629	0.662627	0.178731	1.28205	98.7179	1.15903	98.841	0.123016	NO
TCGA-91-6829-01A-21H-1857-13	LUAD	MIR365A	hsa-mir-365a	chr16	+	3p	14309314	COSN24408400	non-seed duplex_5p	15	NA	NA	G	T	2	207	0.00966184	-6.69349	0.0231458	-5.74676	6.54205e-71	3.36915e-68	-0.969658	0.332217	0.478578	0.956938	99.0431	2.26222	97.7378	1.30528	NO
TCGA-AZ-6601-01A-11H-1773-13	COAD	MIR365A	hsa-mir-365a	chr16	+	3p	14309287	NA	flanking-5	NA	NA	-13	C	T	3	114	0.0263158	-5.24793	0.0217274	-5.82187	5.06732e-22	2.60967e-19	0.59464	0.552084	0.257995	2.5641	97.4359	2.12653	97.8735	0.43757	NO
TCGA-A2-A04W-01A-31R-A114-13	BRCA	MIR369	hsa-mir-369	chr14	+	3p	101065634	COSN23014475	loop	NA	7	NA	G	A	60	35	1.71429	0.777608	0.8508	-0.50794	1.18743e-66	6.11529e-64	1.39145	0.16409	0.784917	63.1579	36.8421	45.9693	54.0307	17.1886	NO
TCGA-CD-5801-01A-11R-1602-13	STAD	MIR369	hsa-mir-369	chr14	+	3p	101065610	COSN19673117	seed_5p	5	NA	NA	C	T	56	34	1.64706	0.719892	1.08601	-0.117521	6.84049e-29	3.52285e-26	1.0168	0.309249	0.509692	62.2222	37.7778	52.0615	47.9385	10.1607	NO
TCGA-CG-5734-01A-11R-1602-13	STAD	MIR369	hsa-mir-369	chr14	+	3p	101065611	COSN23023779	seed_5p	6	NA	NA	G	A	69	58	1.18966	0.250543	1.08565	-0.118849	1.50633e-08	7.75762e-06	0.447691	0.654377	0.184172	54.3307	45.6693	52.0534	47.9466	2.27728	NO
TCGA-G3-A5SK-01A-11R-A27R-13	LIHC	MIR374B	hsa-mir-374b	chrX	-	5p	74218572	COSN16303142	seed_3p	7	NA	NA	T	G	353	28	12.6071	3.65617	37.0514	5.08396	1.48351e-154	7.64006e-152	-2.37113	0.0177337	1.7512	92.6509	7.34908	97.372	2.62802	4.72106	NO
TCGA-E6-A1M0-01A-11R-A143-13	UCEC	MIR374B	hsa-mir-374b	chrX	-	5p	74218626	NA	flanking-5	NA	NA	-18	C	A	144	12	12	3.58496	33.9743	4.86326	1.459e-149	7.51383e-147	-1.6005	0.109488	0.960632	92.3077	7.69231	97.1408	2.85924	4.83306	NO
TCGA-AB-2808-03A-01T-0734-13	LAML	MIR374B	hsa-mir-374b	chrX	-	5p	74218618	NA	flanking-5	NA	NA	-10	T	A	273	25	10.92	3.4489	25.2145	4.43486	2.03027e-44	1.04559e-41	-1.3571	0.174749	0.757586	91.6107	8.38926	96.1853	3.81469	4.57458	NO
TCGA-B5-A11L-01B-21R-A13R-13	UCEC	MIR374B	hsa-mir-374b	chrX	-	5p	74218537	NA	flanking-3	NA	NA	20	C	T	171	8	21.375	4.41785	33.9743	4.86326	2.48998e-33	1.28234e-30	-0.557673	0.577068	0.238773	95.5307	4.46927	97.1408	2.85924	1.61003	NO
TCGA-A6-A566-01A-11H-A28I-13	COAD	MIR374B	hsa-mir-374b	chrX	-	5p	74218546	NA	flanking-3	NA	NA	11	T	C	421	17	24.7647	4.63021	33.3021	4.83017	9.62375e-07	0.000495623	-0.245392	0.806153	0.0935827	96.1187	3.88128	97.0847	2.91527	0.966008	NO
TCGA-IR-A3LI-01A-11R-A214-13	CESC	MIR376C	hsa-mir-376c	chr14	+	3p	101039762	NA	flanking-3	NA	NA	10	C	T	7	64	0.109375	-3.19265	0.105726	-3.43461	0.00826397	1	0.302915	0.761955	0.118071	9.85915	90.1408	9.5617	90.4383	0.297452	NO
TCGA-CV-5443-01A-01R-1513-13	HNSC	MIR379	hsa-mir-379	chr14	+	5p	101022093	COSN7428815	loop	NA	2	NA	G	A	3830	1	3830	11.9031	1054.67	9.77595	3.82515e-220	1.96995e-217	2.40966	0.0159673	1.79677	99.9739	0.0261028	99.9053	0.0947263	0.0686234	NO
TCGA-GN-A4U8-06A-11R-A360-13	SKCM	MIR379	hsa-mir-379	chr14	+	5p	101022061	NA	flanking-5	NA	NA	-10	C	T	142	1	142	7.14975	908.22	9.33662	5.29094e-139	2.72484e-136	-1.78057	0.0749822	1.12504	99.3007	0.699301	99.89	0.109984	0.589316	NO
TCGA-CK-6747-01A-11H-1838-13	COAD	MIR379	hsa-mir-379	chr14	+	5p	101022093	COSN7428815	loop	NA	2	NA	G	A	4453	2	2226.5	11.1206	1039.99	9.71732	5.72343e-117	2.94757e-114	1.48409	0.137784	0.8608	99.9551	0.0448934	99.9039	0.0960625	0.0511692	NO
TCGA-GN-A26C-01A-11R-A18W-13	SKCM	MIR379	hsa-mir-379	chr14	+	5p	101022098	NA	loop	NA	7	NA	G	A	1722	1	1722	10.7499	908.22	9.33662	6.6021e-83	3.40008e-80	1.15068	0.249865	0.602294	99.942	0.0580383	99.89	0.109984	0.0519461	NO
TCGA-AX-A3G9-01A-11R-A22I-13	UCEC	MIR379	hsa-mir-379	chr14	+	5p	101022086	COSN18715117	non-seed duplex_5p	16	NA	NA	C	T	2827	2	1413.5	10.4651	763.213	9.14859	1.41352e-100	7.27962e-98	1.14635	0.25165	0.599202	99.9293	0.0706964	99.8691	0.130853	0.0601571	NO
TCGA-55-7574-01A-11H-2038-13	LUAD	MIR379	hsa-mir-379	chr14	+	5p	101022151	NA	flanking-3	NA	NA	21	C	T	4904	4	1226	10.2597	819.64	9.32952	9.59951e-73	4.94375e-70	0.938351	0.348064	0.458341	99.9185	0.0814996	99.8781	0.121856	0.0403566	NO
TCGA-FD-A6TI-01A-11R-A32J-13	BLCA	MIR379	hsa-mir-379	chr14	+	5p	101022067	NA	flanking-5	NA	NA	-4	G	C	4744	10	474.4	8.88996	905.331	9.52476	6.03671e-38	3.10891e-35	-0.700509	0.48361	0.315505	99.7897	0.210349	99.8897	0.110335	0.100014	NO
TCGA-D7-6518-01A-11R-1802-13	STAD	MIR379	hsa-mir-379	chr14	+	5p	101022093	COSN7428815	loop	NA	2	NA	G	A	6935	8	866.875	9.75968	787.528	9.32511	3.96951e-21	2.0443e-18	0.472019	0.636913	0.19592	99.8848	0.115224	99.8732	0.126819	0.0115946	NO
TCGA-VQ-A91D-01A-11R-A415-13	STAD	MIR379	hsa-mir-379	chr14	+	5p	101022054	NA	flanking-5	NA	NA	-17	C	T	2301	3	767	9.58308	787.276	9.32466	6.92553e-09	3.56665e-06	0.280691	0.778947	0.108492	99.8698	0.130208	99.8731	0.126859	0.00334915	NO
TCGA-78-7535-01A-11H-2065-13	LUAD	MIR379	hsa-mir-379	chr14	+	5p	101022087	COSN24410139	non-seed duplex_5p	17	NA	NA	G	T	2175	4	543.75	9.0868	820.729	9.3315	0.781002	1	-0.196878	0.84461	0.0733438	99.8164	0.18357	99.8783	0.121695	0.0618758	NO
TCGA-95-7039-01A-11H-1948-13	LUAD	MIR379	hsa-mir-379	chr14	+	5p	101022087	COSN24410139	non-seed duplex_5p	17	NA	NA	G	T	2912	5	582.4	9.18587	820.729	9.3315	0.781002	1	-0.196878	0.84461	0.0733438	99.8286	0.171409	99.8783	0.121695	0.0497144	NO
TCGA-FR-A8YE-06A-11R-A37G-13	SKCM	MIR379	hsa-mir-379	chr14	+	5p	101022145	NA	flanking-3	NA	NA	15	C	T	1117	2	558.5	9.12541	908.22	9.33662	0.000334447	0.17224	-0.171969	0.863462	0.0637569	99.8213	0.178731	99.89	0.109984	0.0687466	NO
TCGA-D3-A5GL-06A-11R-A27U-13	SKCM	MIR379	hsa-mir-379	chr14	+	5p	101022139	NA	flanking-3	NA	NA	9	C	T	1221	2	610.5	9.25385	908.22	9.33662	0.157206	1	-0.067397	0.946266	0.0239869	99.8365	0.163532	99.89	0.109984	0.0535479	NO
TCGA-YD-A9TA-06A-11R-A39J-13	SKCM	MIR381	hsa-mir-381	chr14	+	3p	101045996	NA	flanking-3	NA	NA	7	C	T	2	99	0.020202	-5.62936	0.0200507	-6.1496	8.46288e-12	4.35838e-09	0.440189	0.659801	0.180587	1.9802	98.0198	1.96566	98.0343	0.0145419	NO
TCGA-A5-A0R7-01A-31R-A103-13	UCEC	MIR381	hsa-mir-381	chr14	+	3p	101045927	COSN2381583	non-seed duplex_5p	1	NA	NA	A	G	1	59	0.0169492	-5.88264	0.0163582	-6.29447	1.67233e-13	8.6125e-11	0.390258	0.696346	0.157175	1.66667	98.3333	1.6095	98.3905	0.0571709	NO
TCGA-CG-5730-01A-11R-1602-13	STAD	MIR382	hsa-mir-382	chr14	+	5p	101054348	NA	loop	NA	11	NA	G	T	68	10	6.8	2.76553	9.6018	3.08245	3.77831e-14	1.94583e-11	-0.46783	0.639906	0.193884	87.1795	12.8205	90.5676	9.43236	3.38815	NO
TCGA-EE-A2MI-06A-11R-A18X-13	SKCM	MIR382	hsa-mir-382	chr14	+	5p	101054377	NA	flanking-3	NA	NA	5	C	T	278	23	12.087	3.59538	12.9268	3.4733	0.018185	1	0.158619	0.873969	0.0585041	92.3588	7.6412	92.8196	7.18038	0.460815	NO
TCGA-64-1676-01A-01T-0947-13	LUAD	MIR409	hsa-mir-409	chr14	+	both	101065373	COSN24408235	flanking-3	NA	NA	6	G	A	88	55	1.6	0.678072	0.479377	-1.29688	4.19696e-121	2.16143e-118	2.34986	0.0187804	1.72629	61.5385	38.4615	32.404	67.596	29.1345	NO
TCGA-FS-A1ZD-06A-11R-A18W-13	SKCM	MIR409	hsa-mir-409	chr14	+	both	101065343	COSN2381577	loop	NA	7	NA	G	A	137	202	0.678218	-0.560179	0.369835	-1.71098	2.5837e-55	1.33061e-52	1.17422	0.240305	0.619237	40.413	59.587	26.9985	73.0015	13.4145	NO
TCGA-GU-AATQ-01A-11R-A39B-13	BLCA	MIR409	hsa-mir-409	chr14	+	both	101065342	NA	loop	NA	6	NA	C	A	16	80	0.2	-2.32193	0.493728	-1.27687	5.87848e-67	3.02742e-64	-1.16827	0.242697	0.614935	16.6667	83.3333	33.0534	66.9466	16.3867	NO
TCGA-EE-A2MR-06A-11R-A18V-13	SKCM	MIR409	hsa-mir-409	chr14	+	both	101065366	COSN23022149	non-seed duplex_3p	21	NA	NA	C	T	74	132	0.560606	-0.834941	0.369815	-1.71109	4.57878e-38	2.35807e-35	0.893959	0.371344	0.430224	35.9223	64.0777	26.9974	73.0026	8.92488	NO
TCGA-L5-A88S-01A-11R-A36E-13	ESCA	MIR409	hsa-mir-409	chr14	+	both	101065342	NA	loop	NA	6	NA	C	T	65	194	0.335052	-1.57755	0.436216	-1.32504	5.35593e-06	0.0027583	-0.40644	0.68442	0.164678	25.0965	74.9035	30.3726	69.6274	5.27607	NO
TCGA-55-8089-01A-11H-2240-13	LUAD	MIR409	hsa-mir-409	chr14	+	both	101065372	COSN24410127	flanking-3	NA	NA	5	G	T	27	53	0.509434	-0.973033	0.479377	-1.29688	1.98245e-10	1.02096e-07	0.385326	0.699996	0.154904	33.75	66.25	32.404	67.596	1.34602	NO
TCGA-LN-A4A4-01A-11R-A261-13	ESCA	MIR411	hsa-mir-411	chr14	+	5p	101023327	NA	flanking-5	NA	NA	-13	G	T	43	12	3.58333	1.8413	6.50491	2.46816	8.54327e-06	0.00439978	-0.750812	0.452766	0.344126	78.1818	21.8182	86.6754	13.3246	8.49357	NO
TCGA-5M-AAT6-01A-11H-A41D-13	COAD	MIR412	hsa-mir-412	chr14	+	5p	101065455	NA	flanking-5	NA	NA	-10	C	T	87	2	43.5	5.44294	70.1806	5.98964	4.76863e-08	2.45585e-05	-0.808167	0.418995	0.377791	97.7528	2.24719	98.5951	1.40488	0.842313	NO
TCGA-24-1422-01A-01R-1565-13	OV	MIR423	hsa-mir-423	chr17	+	5p	30117165	NA	flanking-3	NA	NA	12	A	C	1300	1950	0.666667	-0.584963	0.555638	-1.047	2.49411e-31	1.28447e-28	0.559727	0.575666	0.23983	40	60	35.7177	64.2823	4.28229	NO
TCGA-BC-A217-01A-11R-A154-13	LIHC	MIR424	hsa-mir-424	chrX	-	5p	134546724	NA	flanking-5	NA	NA	-23	G	T	1745	19	91.8421	6.52108	32.183	4.85547	1.22229e-165	6.29478e-163	2.5687	0.0102082	1.99105	98.9229	1.0771	96.9864	3.01359	1.9365	NO
TCGA-C4-A0EZ-01A-21R-A24Y-13	BLCA	MIR424	hsa-mir-424	chrX	-	5p	134546697	COSM422225	seed_5p	5	NA	NA	T	A	306	6	51	5.67243	32.3404	4.87486	4.12519e-87	2.12447e-84	1.25643	0.208961	0.679934	98.0769	1.92308	97.0006	2.99936	1.07628	NO
TCGA-B5-A11N-01A-11R-A119-13	UCEC	MIR424	hsa-mir-424	chrX	-	5p	134546636	NA	flanking-3	NA	NA	8	G	A	658	9	73.1111	6.19202	48.5435	5.32651	1.46249e-78	7.53184e-76	0.962246	0.335926	0.473757	98.6507	1.34933	97.9816	2.01843	0.669104	NO
TCGA-EO-A22T-01A-21R-A18L-13	UCEC	MIR424	hsa-mir-424	chrX	-	5p	134546629	NA	flanking-3	NA	NA	15	T	C	770	33	23.3333	4.54432	48.5435	5.32651	9.03063e-68	4.65077e-65	-0.869607	0.384515	0.415087	95.8904	4.10959	97.9816	2.01843	2.09116	NO
TCGA-G4-6303-01A-11H-1773-13	COAD	MIR424	hsa-mir-424	chrX	-	5p	134546635	NA	flanking-3	NA	NA	9	C	T	6904	139	49.6691	5.63428	55.9142	5.46563	0.000306146	0.157665	0.172298	0.863204	0.0638868	98.0264	1.97359	98.243	1.75703	0.216561	NO
TCGA-24-2033-01A-01R-1568-13	OV	MIR424	hsa-mir-424	chrX	-	5p	134546620	NA	flanking-3	NA	NA	24	C	T	20	53	0.377358	-1.40599	2.56199	-1.73482	0.0193594	1	0.141856	0.887194	0.0519816	27.3973	72.6027	71.9258	28.0742	44.5285	NO
TCGA-78-7167-01A-11H-2065-13	LUAD	MIR425	hsa-mir-425	chr3	-	5p	49020134	NA	flanking-3	NA	NA	25	T	A	144	43	3.34884	1.74366	16.3233	3.77949	9.33721e-223	4.80866e-220	-2.46369	0.0137515	1.86165	77.0053	22.9947	94.2274	5.77256	17.2221	NO
TCGA-IR-A3LI-01A-11R-A214-13	CESC	MIR425	hsa-mir-425	chr3	-	5p	49020178	COSN16131364	seed_3p	3	NA	NA	G	A	635	60	10.5833	3.40372	29.5226	4.59085	1.75631e-70	9.045e-68	-1.33743	0.181082	0.742125	91.3669	8.63309	96.7237	3.27626	5.35684	NO
TCGA-G3-A25Y-01A-11R-A16S-13	LIHC	MIR425	hsa-mir-425	chr3	-	5p	49020176	COSN16303086	seed_3p	5	NA	NA	C	T	594	59	10.0678	3.33168	23.7338	4.31349	2.30144e-74	1.18524e-71	-1.20724	0.227338	0.643328	90.9648	9.03522	95.957	4.04305	4.99217	NO
TCGA-2Y-A9H0-01A-11R-A38M-13	LIHC	MIR425	hsa-mir-425	chr3	-	5p	49020234	NA	flanking-5	NA	NA	-13	C	G	1247	99	12.596	3.65489	23.7447	4.31439	1.24465e-42	6.40994e-40	-0.811321	0.417181	0.379675	92.6449	7.35513	95.9587	4.04126	3.31386	NO
TCGA-CM-6674-01A-11H-1838-13	COAD	MIR431	hsa-mir-431	chr14	+	3p	100881038	COSM1368245	non-seed duplex_5p	13	NA	NA	C	T	49	118	0.415254	-1.26793	0.359008	-1.73261	5.38422e-11	2.77287e-08	0.519035	0.603737	0.219152	29.3413	70.6587	26.4169	73.5831	2.92437	NO
TCGA-HR-A2OG-06A-21R-A18X-13	SKCM	MIR432	hsa-mir-432	chr14	+	5p	100884501	COSM3493811	seed_5p	6	NA	NA	G	A	78	1	78	6.2854	173.348	6.77423	2.85937e-06	0.00147257	-0.397371	0.691094	0.160463	98.7342	1.26582	99.4264	0.573566	0.692257	NO
TCGA-SW-A7EA-01A-12R-A353-13	STAD	MIR432	hsa-mir-432	chr14	+	5p	100884580	NA	flanking-3	NA	NA	16	G	T	70	1	70	6.12928	78.252	6.12904	0.99688	1	0.000373681	0.999702	0.000129506	98.5915	1.40845	98.7382	1.2618	0.146652	NO
TCGA-QR-A6H5-01A-11R-A35M-13	PCPG	MIR433	hsa-mir-433	chr14	+	3p	100881893	NA	flanking-5	NA	NA	-4	G	A	46	2672	0.0172156	-5.86014	0.0130779	-6.43153	7.57829e-20	3.90282e-17	0.808558	0.41877	0.378025	1.69242	98.3076	1.29091	98.7091	0.401511	NO
TCGA-DF-A2KV-01A-11R-A17X-13	UCEC	MIR449B	hsa-mir-449b	chr5	-	5p	55170654	NA	flanking-3	NA	NA	13	T	G	69	78	0.884615	-0.176878	2.12815	0.646384	5.45223e-18	2.8079e-15	-0.697764	0.485325	0.313967	46.9388	53.0612	68.0322	31.9678	21.0935	NO
TCGA-N5-A4RA-01A-11R-A28Z-13	UCS	MIR452	hsa-mir-452	chrX	-	5p	151959619	NA	flanking-3	NA	NA	15	A	G	595	85	7	2.80735	10.9285	3.33437	1.65785e-08	8.53794e-06	-0.940706	0.346855	0.459851	87.5	12.5	91.6167	8.38326	4.11674	NO
TCGA-BC-A112-01A-11R-A130-13	LIHC	MIR452	hsa-mir-452	chrX	-	5p	151959609	NA	flanking-3	NA	NA	25	T	C	93	3	31	4.9542	26.8537	4.60392	4.8909e-23	2.51881e-20	0.554502	0.579235	0.237145	96.875	3.125	96.4098	3.59018	0.465183	NO
TCGA-EY-A2OP-01A-11R-A19V-13	UCEC	MIR452	hsa-mir-452	chrX	-	5p	151959720	NA	flanking-5	NA	NA	-21	A	C	54	6	9	3.16993	14.5025	3.60537	4.94745e-22	2.54794e-19	-0.512384	0.608382	0.215823	90	10	93.5494	6.45058	3.54942	NO
TCGA-G3-A5SM-01A-12R-A28Z-13	LIHC	MIR452	hsa-mir-452	chrX	-	5p	151959683	COSN16303043	non-seed duplex_5p	17	NA	NA	T	A	530	19	27.8947	4.80192	26.8637	4.60446	5.56704e-09	2.86703e-06	0.312602	0.754583	0.122293	96.5392	3.46084	96.4111	3.5889	0.128067	NO
TCGA-B7-5816-01A-21R-1602-13	STAD	MIR452	hsa-mir-452	chrX	-	5p	151959620	NA	flanking-3	NA	NA	14	G	T	261	13	20.0769	4.32747	23.5051	4.23877	0.0787895	1	0.093167	0.925771	0.0334965	95.2555	4.74453	95.9192	4.08078	0.663744	NO
TCGA-D7-A4YV-01A-11R-A252-13	STAD	MIR454	hsa-mir-454	chr17	-	3p	59137873	NA	flanking-5	NA	NA	-24	AT	A	12	83	0.144578	-2.79008	0.103729	-3.51632	0.0934033	1	1.20268	0.229131	0.639916	12.6316	87.3684	9.39804	90.602	3.23354	NO
TCGA-CG-5726-01A-11R-1602-13	STAD	MIR454	hsa-mir-454	chr17	-	3p	59137873	NA	flanking-5	NA	NA	-24	AT	A	13	57	0.22807	-2.13245	0.103729	-3.51632	0.0934033	1	1.20268	0.229131	0.639916	18.5714	81.4286	9.39804	90.602	9.17339	NO
TCGA-D7-A6EY-01A-21R-A31Q-13	STAD	MIR455	hsa-mir-455	chr9	+	both	114209428	NA	flanking-5	NA	NA	-21	C	T	97	527	0.184061	-2.44175	0.243044	-2.50463	0.265203	1	0.0528838	0.957824	0.0187141	15.5449	84.4551	19.5523	80.4477	4.00744	NO
TCGA-WE-AAA3-06A-11R-A38N-13	SKCM	MIR455	hsa-mir-455	chr9	+	both	114209435	NA	flanking-5	NA	NA	-14	C	T	25	1005	0.0248756	-5.32912	0.0312491	-5.37684	0.32808	1	0.0463601	0.963023	0.0163632	2.42718	97.5728	3.03022	96.9698	0.603032	NO
TCGA-DI-A1BY-01A-21R-A136-13	UCEC	MIR4668	hsa-mir-4668	chr9	+	5p	111932183	NA	flanking-3	NA	NA	14	C	T	1	52	0.0192308	-5.70044	0.0147584	-6.11266	2.09029e-06	0.0010765	1.32748	0.184349	0.734358	1.88679	98.1132	1.45437	98.5456	0.432421	NO
TCGA-61-1911-01A-01R-1567-13	OV	MIR4728	hsa-mir-4728	chr17	+	both	39726473	NA	flanking-5	NA	NA	-23	T	G	4	135	0.0296296	-5.07682	0.0244102	-5.78161	8.06258e-33	4.15223e-30	0.642154	0.520773	0.283351	2.8777	97.1223	2.38286	97.6171	0.494842	NO
TCGA-D1-A167-01A-11R-A12H-13	UCEC	MIR4746	hsa-mir-4746	chr19	+	5p	4446056	NA	flanking-3	NA	NA	15	C	T	57	1	57	5.83289	82.241	6.22332	1.615e-08	8.31723e-06	-0.688001	0.491452	0.308519	98.2759	1.72414	98.7987	1.20133	0.522806	NO
TCGA-44-7667-01A-31H-2065-13	LUAD	MIR483	hsa-mir-483	chr11	-	both	2134174	COSN24409740	loop	NA	7	NA	G	T	126	75	1.68	0.748461	1.16827	0.0491945	8.66218e-05	0.0446102	0.94217	0.346106	0.460791	62.6866	37.3134	53.8803	46.1197	8.80623	NO
TCGA-BR-8679-01A-11R-2402-13	STAD	MIR490	hsa-mir-490	chr7	+	both	136903198	NA	flanking-5	NA	NA	-7	T	G	3	62	0.0483871	-4.36923	0.0582235	-4.50431	0.191309	1	0.12654	0.899305	0.0460931	4.61538	95.3846	5.50201	94.498	0.88662	NO
TCGA-46-3767-01A-01T-0981-13	LUSC	MIR493	hsa-mir-493	chr14	+	both	100869102	COSN2378441	loop	NA	6	NA	G	T	22	31	0.709677	-0.494765	1.24054	0.208944	6.27503e-50	3.23164e-47	-1.35803	0.174453	0.758322	41.5094	58.4906	55.3678	44.6322	13.8584	NO
TCGA-EE-A2MR-06A-11R-A18V-13	SKCM	MIR493	hsa-mir-493	chr14	+	both	100869113	COSN5026504	loop	NA	17	NA	C	T	39	17	2.29412	1.19794	1.69819	0.602001	5.74045e-28	2.95633e-25	0.955614	0.339267	0.469458	69.6429	30.3571	62.9381	37.0619	6.70473	NO
TCGA-O2-A52N-01A-11H-A26V-13	LUSC	MIR493	hsa-mir-493	chr14	+	both	100869113	NA	loop	NA	17	NA	C	A	48	49	0.979592	-0.0297473	1.24054	0.208944	1.79223e-10	9.22996e-08	-0.460632	0.645063	0.190398	49.4845	50.5155	55.3678	44.6322	5.8833	NO
TCGA-04-1646-01A-01R-1567-13	OV	MIR493	hsa-mir-493	chr14	+	both	100869061	NA	flanking-5	NA	NA	-14	TG	T	39	13	3	1.58496	2.87079	1.23275	8.67154e-11	4.46584e-08	0.437465	0.661774	0.17929	75	25	74.1655	25.8345	0.83454	NO
TCGA-XE-AANJ-01A-11R-A43A-13	TGCT	MIR495	hsa-mir-495	chr14	+	3p	101033752	NA	flanking-5	NA	NA	-16	C	T	4	707	0.00565771	-7.46557	0.02218	-5.69592	1.91842e-60	9.87985e-58	-2.20564	0.0274092	1.5621	0.562588	99.4374	2.16987	97.8301	1.60728	NO
TCGA-37-3789-01A-01T-0981-13	LUSC	MIR495	hsa-mir-495	chr14	+	3p	101033788	COSN2378433	non-seed duplex_5p	21	NA	NA	C	T	3	74	0.0405405	-4.62449	0.0280273	-5.36558	5.78332e-09	2.97841e-06	0.89868	0.368823	0.433182	3.8961	96.1039	2.72632	97.2737	1.16979	NO
TCGA-DA-A1HY-06A-11R-A18W-13	SKCM	MIR495	hsa-mir-495	chr14	+	3p	101033844	NA	flanking-3	NA	NA	19	C	T	4	111	0.036036	-4.79442	0.0357034	-5.18746	0.00227648	1	0.357455	0.720752	0.142214	3.47826	96.5217	3.44726	96.5527	0.0309985	NO
TCGA-D1-A174-01A-11R-A12H-13	UCEC	MIR497	hsa-mir-497	chr17	-	5p	7017924	NA	flanking-3	NA	NA	14	TC	T	899	26	34.5769	5.11174	54.0844	5.44776	4.65491e-14	2.39728e-11	-0.358464	0.719996	0.14267	97.1892	2.81081	98.1846	1.8154	0.995415	NO
TCGA-FR-A3YO-06A-11R-A23A-13	SKCM	MIR500A	hsa-mir-500a	chrX	+	3p	50008523	NA	flanking-3	NA	NA	20	C	T	5	1055	0.00473934	-7.7211	0.0154786	-6.20743	1.76961e-156	9.11348e-154	-1.97416	0.0483639	1.31548	0.471698	99.5283	1.52427	98.4757	1.05257	NO
TCGA-D8-A1JN-01A-11R-A13P-13	BRCA	MIR500A	hsa-mir-500a	chrX	+	3p	50008509	NA	flanking-3	NA	NA	6	G	A	1	191	0.0052356	-7.57743	0.018437	-6.00826	0	0	-1.81677	0.0692531	1.15956	0.520833	99.4792	1.81033	98.1897	1.28949	NO
TCGA-GK-A6C7-01A-11R-A33A-13	KIRC	MIR500A	hsa-mir-500a	chrX	+	3p	50008524	NA	flanking-3	NA	NA	21	G	T	74	2269	0.0326135	-4.93839	0.0241285	-5.54067	6.16887e-67	3.17697e-64	0.857215	0.391326	0.407461	3.15834	96.8417	2.35601	97.644	0.802337	NO
TCGA-AX-A05S-01A-11R-A00W-13	UCEC	MIR500A	hsa-mir-500a	chrX	+	3p	50008455	COSN503234	non-seed duplex_5p	13	NA	NA	C	A	9	701	0.0128388	-6.28335	0.0201754	-5.84601	6.94504e-28	3.57669e-25	-0.497185	0.619059	0.208268	1.26761	98.7324	1.97764	98.0224	0.710036	NO
TCGA-B5-A0JV-01A-11R-A103-13	UCEC	MIR500A	hsa-mir-500a	chrX	+	3p	50008517	NA	flanking-3	NA	NA	14	C	T	4	194	0.0206186	-5.59991	0.0201556	-5.84753	1.25988e-10	6.48838e-08	0.281507	0.778322	0.108841	2.0202	97.9798	1.97574	98.0243	0.0444646	NO
TCGA-ER-A19S-06A-11R-A18X-13	SKCM	MIR500A	hsa-mir-500a	chrX	+	3p	50008447	COSN1085194	seed_5p	5	NA	NA	C	T	68	5437	0.0125069	-6.32113	0.0154861	-6.20678	0.00170675	0.878975	-0.149114	0.881464	0.0547955	1.23524	98.7648	1.525	98.475	0.289758	NO
TCGA-05-4390-01A-02T-1754-13	LUAD	MIR500A	hsa-mir-500a	chrX	+	3p	50008488	COSN24409322	seed_3p	7	NA	NA	C	A	24	1204	0.0199336	-5.64866	0.0246033	-5.53666	0.00073019	0.376048	-0.149025	0.881534	0.0547609	1.9544	98.0456	2.40125	97.5988	0.446851	NO
TCGA-E6-A1M0-01A-11R-A143-13	UCEC	MIR500A	hsa-mir-500a	chrX	+	3p	50008523	NA	flanking-3	NA	NA	20	C	T	16	909	0.0176018	-5.82814	0.0201556	-5.84753	0.607652	1	0.0220462	0.982411	0.00770673	1.72973	98.2703	1.97574	98.0243	0.246008	NO
TCGA-AA-3833-01A-01T-0906-13	COAD	MIR500A	hsa-mir-500a	chrX	+	3p	50008509	NA	flanking-3	NA	NA	6	G	A	2	116	0.0172414	-5.85798	0.0201868	-5.84131	0.655012	1	-0.0209376	0.983295	0.00731599	1.69492	98.3051	1.97873	98.0213	0.283816	NO
TCGA-QF-A5YS-01A-11R-A31S-13	UCEC	MIR500B	hsa-mir-500b	chrX	+	5p	50010761	NA	flanking-3	NA	NA	20	C	T	52	18	2.88889	1.53051	4.79483	1.94689	0.0969481	1	0.971348	0.331399	0.479649	74.2857	25.7143	82.7432	17.2568	8.45752	NO
TCGA-B5-A11N-01A-11R-A119-13	UCEC	MIR500B	hsa-mir-500b	chrX	+	5p	50010761	NA	flanking-3	NA	NA	20	C	T	89	12	7.41667	2.89077	4.79483	1.94689	0.0969481	1	0.971348	0.331399	0.479649	88.1188	11.8812	82.7432	17.2568	5.37558	NO
TCGA-D1-A16Y-01A-31R-A12H-13	UCEC	MIR500B	hsa-mir-500b	chrX	+	5p	50010761	NA	flanking-3	NA	NA	20	C	T	57	3	19	4.24793	4.79483	1.94689	0.0969481	1	0.971348	0.331399	0.479649	95	5	82.7432	17.2568	12.2568	NO
TCGA-52-7622-01A-11H-2124-13	LUSC	MIR501	hsa-mir-501	chrX	+	3p	50009808	NA	flanking-3	NA	NA	15	C	A	30	313	0.0958466	-3.38313	0.0795475	-3.86457	5.99727e-31	3.0886e-28	0.592007	0.553846	0.256611	8.74636	91.2536	7.3686	92.6314	1.37776	NO
TCGA-49-AARE-01A-11H-A41D-13	LUAD	MIR501	hsa-mir-501	chrX	+	3p	50009815	NA	flanking-3	NA	NA	22	G	A	15	183	0.0819672	-3.60881	0.108083	-3.45188	4.34445e-05	0.0223739	-0.187552	0.851228	0.0699542	7.57576	92.4242	9.75403	90.246	2.17828	NO
TCGA-DD-A1EK-01A-11R-A214-13	LIHC	MIR502	hsa-mir-502	chrX	+	3p	50014594	NA	flanking-5	NA	NA	-19	G	A	10	203	0.0492611	-4.34341	0.148424	-3.02489	1.40651e-69	7.24351e-67	-1.51285	0.130318	0.884996	4.69484	95.3052	12.9241	87.0759	8.22929	NO
TCGA-EE-A3J7-06A-11R-A20E-13	SKCM	MIR505	hsa-mir-505	chrX	-	3p	139924139	NA	flanking-3	NA	NA	21	G	A	14	84	0.166667	-2.58496	0.267103	-2.10321	1.12678e-33	5.8029e-31	-0.630229	0.528545	0.276918	14.2857	85.7143	21.0798	78.9202	6.7941	NO
TCGA-MU-A51Y-01A-11R-A26X-13	CESC	MIR505	hsa-mir-505	chrX	-	3p	139924159	COSN16129878	flanking-3	23	NA	NA	G	A	56	300	0.186667	-2.42146	0.163057	-2.74644	1.33303e-17	6.8651e-15	0.529248	0.596633	0.224293	15.7303	84.2697	14.0197	85.9803	1.71068	NO
TCGA-CD-A4MG-01A-11R-A252-13	STAD	MIR505	hsa-mir-505	chrX	-	3p	139924147	NA	flanking-3	NA	NA	13	C	T	18	144	0.125	-3	0.170278	-2.69063	6.25953e-21	3.22366e-18	-0.484723	0.627873	0.202128	11.1111	88.8889	14.5502	85.4498	3.43909	NO
TCGA-13-1477-01A-01R-1565-13	OV	MIR505	hsa-mir-505	chrX	-	3p	139924228	NA	flanking-5	NA	NA	-11	C	T	57	283	0.201413	-2.31177	0.259952	-2.08438	1.00845e-14	5.1935e-12	-0.360749	0.718287	0.143702	16.7647	83.2353	20.6319	79.3681	3.86722	NO
TCGA-BG-A0MI-01A-11R-A041-13	UCEC	MIR505	hsa-mir-505	chrX	-	3p	139924225	NA	flanking-5	NA	NA	-8	G	T	12	65	0.184615	-2.43741	0.178623	-2.60202	3.23249e-10	1.66473e-07	0.278144	0.780902	0.107403	15.5844	84.4156	15.1552	84.8448	0.429219	NO
TCGA-ER-A3PL-06A-11R-A23A-13	SKCM	MIR510	hsa-mir-510	chrX	-	both	147272414	NA	flanking-5	NA	NA	-15	T	C	10	56	0.178571	-2.48543	0.133152	-3.36687	4.18108e-10	2.15325e-07	0.715838	0.474091	0.324138	15.1515	84.8485	11.7506	88.2494	3.40095	NO
TCGA-EE-A20C-06A-11R-A18V-13	SKCM	MIR511	hsa-mir-511	chr10	+	3p	17845147	NA	loop	NA	5	NA	A	T	75	3	25	4.64386	41.2157	4.99629	6.03207e-09	3.10652e-06	-0.333652	0.738642	0.131566	96.1538	3.84615	97.6312	2.36878	1.47737	NO
TCGA-DA-A95V-06A-11R-A37G-13	SKCM	MIR513C	hsa-mir-513c	chrX	-	both	147189702	NA	flanking-3	NA	NA	15	C	A	113	4	28.25	4.82018	46.4977	5.22027	3.77456e-11	1.9439e-08	-0.410784	0.681231	0.166706	96.5812	3.4188	97.8946	2.10537	1.31344	NO
TCGA-EE-A2GH-06A-11R-A18W-13	SKCM	MIR517B	hsa-mir-517b	chr19	+	3p	53721120	COSN2378634	seed_3p	3	NA	NA	C	T	2	50	0.04	-4.64386	0.39468	-1.81004	5.35836e-16	2.75955e-13	-2.21096	0.0270389	1.56801	3.84615	96.1538	28.2989	71.7011	24.4528	NO
TCGA-53-7624-01A-11H-2065-13	LUAD	MIR518E	hsa-mir-518e	chr19	+	5p	53729922	NA	flanking-3	NA	NA	11	G	A	11383	217	52.4562	5.71304	63.3474	5.20227	0.0557029	1	0.329866	0.741501	0.129888	98.1293	1.87069	98.4459	1.55406	0.316626	NO
TCGA-QK-A8Z8-01A-11R-A39B-13	HNSC	MIR519C	hsa-mir-519c	chr19	+	both	53686464	NA	flanking-5	NA	NA	-20	G	A	55	3	18.3333	4.1964	58.5829	5.41842	5.2492e-17	2.70334e-14	-1.10324	0.269924	0.568758	94.8276	5.17241	98.3217	1.67833	3.49408	NO
TCGA-XU-A92U-01A-11R-A42W-13	THYM	MIR519E	hsa-mir-519e	chr19	+	3p	53679977	NA	loop	NA	3	NA	T	C	22	50	0.44	-1.18442	0.656473	-0.72234	3.26243e-08	1.68015e-05	-0.839228	0.401341	0.396486	30.5556	69.4444	39.6308	60.3692	9.07521	NO
TCGA-DK-A6AV-01A-12R-A30J-13	BLCA	MIR520A	hsa-mir-520a	chr19	+	both	53690974	NA	flanking-3	NA	NA	20	C	T	97	87	1.11494	0.156969	0.66528	-0.731209	2.73104e-13	1.40648e-10	1.35635	0.174987	0.756995	52.7174	47.2826	39.95	60.05	12.7674	NO
TCGA-D9-A1JX-06A-11R-A18V-13	SKCM	MIR520A	hsa-mir-520a	chr19	+	both	53690957	COSN15625239	flanking-3	NA	NA	3	C	T	94	160	0.5875	-0.767339	0.502329	-1.24341	0.00337897	1	0.524182	0.600152	0.221739	37.0079	62.9921	33.4367	66.5633	3.57121	NO
TCGA-EE-A3AG-06A-31R-A18V-13	SKCM	MIR520A	hsa-mir-520a	chr19	+	both	53690978	NA	flanking-3	NA	NA	24	G	A	673	1650	0.407879	-1.29379	0.502329	-1.24341	0.741287	1	-0.0554631	0.95577	0.0196468	28.9712	71.0288	33.4367	66.5633	4.46551	NO
TCGA-EE-A29P-06A-11R-A18W-13	SKCM	MIR520F	hsa-mir-520f	chr19	+	3p	53682244	NA	flanking-3	NA	NA	10	G	A	7	62	0.112903	-3.14684	0.0705502	-4.62887	9.79282e-06	0.0050433	1.1891	0.234401	0.630041	10.1449	89.8551	6.59009	93.4099	3.55484	NO
TCGA-DK-A1AC-01A-11R-A13X-13	BLCA	MIR520F	hsa-mir-520f	chr19	+	3p	53682157	NA	flanking-5	NA	NA	-16	G	T	1	111	0.00900901	-6.79442	0.0213473	-5.97154	0.000114637	0.0590382	-0.813561	0.415896	0.381015	0.892857	99.1071	2.09011	97.9099	1.19725	NO
TCGA-20-0991-01A-01R-1564-13	OV	MIR522	hsa-mir-522	chr19	+	3p	53751223	NA	flanking-5	NA	NA	-3	T	A	260	13	20	4.32193	28.9719	4.0884	0.0515856	1	0.158621	0.873968	0.0585046	95.2381	4.7619	96.6635	3.33646	1.42544	NO
TCGA-DK-A1AC-01A-11R-A13X-13	BLCA	MIR523	hsa-mir-523	chr19	+	5p	53698419	COSN513937	non-seed duplex_5p	20	NA	NA	C	T	1664	22	75.6364	6.24101	88.436	5.96274	0.00326863	1	0.237643	0.812158	0.0903595	98.6951	1.30486	98.8819	1.11812	0.186746	NO
TCGA-G2-A2ES-01A-11R-A17X-13	BLCA	MIR532	hsa-mir-532	chrX	+	5p	50003192	COSN514219	loop	NA	4	NA	C	T	2664	177	15.0508	3.91177	30.7665	4.79692	6.99774e-96	3.60384e-93	-1.34965	0.177129	0.75171	93.7698	6.2302	96.852	3.14797	3.08223	NO
TCGA-5M-AAT6-01A-11H-A41D-13	COAD	MIR532	hsa-mir-532	chrX	+	5p	50003232	NA	flanking-3	NA	NA	7	C	T	4355	222	19.6171	4.29404	34.6992	4.9366	3.1332e-57	1.6136e-54	-0.864752	0.387175	0.412093	95.1497	4.85034	97.1988	2.80118	2.04916	NO
TCGA-BH-A0E9-01B-11R-A114-13	BRCA	MIR532	hsa-mir-532	chrX	+	5p	50003149	NA	flanking-5	NA	NA	-18	G	T	5407	134	40.3507	5.33452	35.6658	4.82453	3.38459e-59	1.74306e-56	0.51986	0.603161	0.219567	97.5817	2.41834	97.2727	2.72734	0.309005	NO
TCGA-AO-A03T-01A-21R-A035-13	BRCA	MIR532	hsa-mir-532	chrX	+	5p	50003161	COSN23017652	flanking-5	NA	NA	-6	C	G	1142	38	30.0526	4.90942	35.6658	4.82453	0.00416762	1	0.0865305	0.931045	0.0310295	96.7797	3.22034	97.2727	2.72734	0.492998	NO
TCGA-85-A4CN-01A-11H-A24G-13	LUSC	MIR542	hsa-mir-542	chrX	-	3p	134541430	NA	flanking-5	NA	NA	-8	G	T	9	754	0.0119363	-6.3885	0.0112993	-6.67839	9.09988e-15	4.68644e-12	0.367429	0.713299	0.146728	1.17955	98.8204	1.11731	98.8827	0.0622466	NO
TCGA-AJ-A2QO-01A-11R-A18L-13	UCEC	MIR542	hsa-mir-542	chrX	-	3p	134541389	NA	loop	NA	11	NA	G	A	2	187	0.0106952	-6.54689	0.0137436	-6.44057	0.00500771	1	-0.12116	0.903564	0.044041	1.0582	98.9418	1.35573	98.6443	0.297527	NO
TCGA-85-7697-01A-11H-2124-13	LUSC	MIR551B	hsa-mir-551b	chr3	+	3p	168551904	NA	loop	NA	8	NA	G	A	2	76	0.0263158	-5.24793	0.0105983	-6.94879	2.73723e-32	1.40967e-29	1.40724	0.159357	0.797629	2.5641	97.4359	1.04871	98.9513	1.51539	NO
TCGA-BR-A4J5-01A-21R-A252-13	STAD	MIR582	hsa-mir-582	chr5	-	5p	59703656	NA	loop	NA	10	NA	T	A	48	1070	0.0448598	-4.47843	0.0615648	-4.1622	6.45112e-23	3.32233e-20	-0.494908	0.620665	0.207143	4.29338	95.7066	5.79944	94.2006	1.50606	NO
TCGA-AA-3509-01A-01T-1409-13	COAD	MIR582	hsa-mir-582	chr5	-	5p	59703625	COSN18166678	flanking-3	NA	NA	5	C	G	19	576	0.0329861	-4.922	0.0335211	-5.02191	0.000368857	0.189961	0.168041	0.866551	0.0622059	3.19328	96.8067	3.24339	96.7566	0.0501118	NO
TCGA-D8-A1JK-01A-11R-A13P-13	BRCA	MIR589	hsa-mir-589	chr7	-	5p	5495844	COSN23017036	non-seed duplex_3p	14	NA	NA	G	C	260	43	6.04651	2.5961	36.3377	4.67176	0	0	-1.79792	0.0721895	1.14153	85.8086	14.1914	97.3217	2.67826	11.5132	NO
TCGA-Z6-A8JE-01A-11R-A37J-13	ESCA	MIR590	hsa-mir-590	chr7	+	both	74191194	NA	flanking-5	NA	NA	-19	C	T	59	24	2.45833	1.29768	2.8342	1.38514	0.067466	1	-0.150397	0.880451	0.0552946	71.0843	28.9157	73.919	26.081	2.83462	NO
TCGA-HP-A5MZ-01A-21R-A27R-13	LIHC	MIR590	hsa-mir-590	chr7	+	both	74191195	NA	flanking-5	NA	NA	-18	C	T	68	31	2.19355	1.13327	2.45352	1.17407	0.218388	1	-0.0670733	0.946523	0.0238687	68.6869	31.3131	71.0441	28.9559	2.35719	NO
TCGA-VQ-A91K-01A-11R-A415-13	STAD	MIR598	hsa-mir-598	chr8	-	3p	11035291	NA	flanking-5	NA	NA	-12	G	T	1	58	0.0172414	-5.85798	0.0097829	-6.95264	3.43475e-56	1.7689e-53	1.13814	0.255063	0.593352	1.69492	98.3051	0.968812	99.0312	0.726103	NO
TCGA-FR-A8YC-06A-11R-A37G-13	SKCM	MIR598	hsa-mir-598	chr8	-	3p	11035210	NA	flanking-3	NA	NA	11	G	A	1	118	0.00847458	-6.88264	0.010652	-7.00737	0.0504734	1	0.105063	0.916326	0.03795	0.840336	99.1597	1.05397	98.946	0.213635	NO
TCGA-FS-A4F0-06A-11R-A24Y-13	SKCM	MIR598	hsa-mir-598	chr8	-	3p	11035250	NA	loop	NA	7	NA	A	G	1	140	0.00714286	-7.12928	0.010652	-7.00737	0.055858	1	-0.102698	0.918203	0.0370615	0.70922	99.2908	1.05397	98.946	0.344752	NO
TCGA-77-A5G6-01A-11H-A27R-13	LUSC	MIR598	hsa-mir-598	chr8	-	3p	11035292	NA	flanking-5	NA	NA	-13	C	A	1	105	0.00952381	-6.71425	0.0108899	-6.75791	0.393963	1	0.0516748	0.958788	0.0182775	0.943396	99.0566	1.07726	98.9227	0.133863	NO
TCGA-G3-A25S-01A-11R-A16S-13	LIHC	MIR629	hsa-mir-629	chr15	-	5p	70079433	COSN16303140	non-seed duplex_5p	15	NA	NA	C	A	1568	19	82.5263	6.36678	34.8041	4.82424	1.62937e-92	8.39125e-90	1.48216	0.138297	0.859188	98.8028	1.19723	97.207	2.79298	1.59575	NO
TCGA-78-7166-01A-12H-2065-13	LUAD	MIR629	hsa-mir-629	chr15	-	5p	70079457	NA	flanking-5	NA	NA	-10	C	A	294	9	32.6667	5.02975	25.7569	4.36353	1.12102e-47	5.77324e-45	0.707591	0.479199	0.319484	97.0297	2.9703	96.2626	3.73735	0.767057	NO
TCGA-BC-A5W4-01A-11R-A28Z-13	LIHC	MIR629	hsa-mir-629	chr15	-	5p	70079371	NA	flanking-3	NA	NA	16	C	A	123	7	17.5714	4.13516	34.7974	4.82393	3.77052e-30	1.94182e-27	-0.661793	0.508104	0.294047	94.6154	5.38462	97.2065	2.7935	2.59112	NO
TCGA-CN-A497-01A-11R-A24J-13	HNSC	MIR6510	hsa-mir-6510	chr17	-	3p	41517236	NA	flanking-5	NA	NA	-21	GC	G	1	255	0.00392157	-7.99435	0.00896763	-7.2461	3.15798e-17	1.62636e-14	-0.579057	0.562551	0.249838	0.390625	99.6094	0.888793	99.1112	0.498168	NO
TCGA-80-5611-01A-01T-1627-13	LUAD	MIR6510	hsa-mir-6510	chr17	-	3p	41517144	NA	flanking-3	NA	NA	22	T	G	1	110	0.00909091	-6.78136	0.0105291	-6.8198	0.757656	1	0.0393635	0.968601	0.0138553	0.900901	99.0991	1.04193	98.9581	0.141034	NO
TCGA-EE-A2MM-06A-11R-A18V-13	SKCM	MIR6516	hsa-mir-6516	chr17	+	3p	77089415	NA	flanking-5	NA	NA	-13	C	T	20	39	0.512821	-0.963474	2.60328	0.894425	0.00846792	1	-1.28119	0.200128	0.698693	33.8983	66.1017	72.2475	27.7525	38.3492	NO
TCGA-NC-A5HD-01A-11H-A26V-13	LUSC	MIR652	hsa-mir-652	chrX	+	3p	110055341	NA	flanking-5	NA	NA	-8	G	A	3	231	0.012987	-6.26679	0.0236357	-5.69461	8.83518e-33	4.55012e-30	-0.606167	0.544404	0.264079	1.28205	98.7179	2.309	97.691	1.02694	NO
TCGA-DA-A1HV-06A-21R-A18V-13	SKCM	MIR653	hsa-mir-653	chr7	-	both	93482765	NA	flanking-3	NA	NA	19	C	T	63	4	15.75	3.97728	45.4793	5.22722	6.06323e-45	3.12256e-42	-1.36469	0.172351	0.763586	94.0299	5.97015	97.8485	2.15149	3.81865	NO
TCGA-BF-AAP4-01A-11R-A404-13	SKCM	MIR653	hsa-mir-653	chr7	-	both	93482816	NA	loop	NA	7	NA	G	A	67	2	33.5	5.06609	45.4793	5.22722	0.0165339	1	-0.175927	0.860351	0.0653242	97.1014	2.89855	97.8485	2.15149	0.747056	NO
TCGA-D5-6931-01A-11H-1927-13	COAD	MIR654	hsa-mir-654	chr14	+	3p	101040262	COSN15625305	loop	NA	7	NA	C	T	10	58	0.172414	-2.53605	0.102205	-3.53919	5.23894e-62	2.69806e-59	1.11159	0.266314	0.574606	14.7059	85.2941	9.27275	90.7273	5.43313	NO
TCGA-D3-A8GB-06A-11R-A37G-13	SKCM	MIR654	hsa-mir-654	chr14	+	3p	101040262	COSN15625305	loop	NA	7	NA	C	T	13	112	0.116071	-3.10692	0.171621	-2.8563	3.45837e-05	0.0178106	-0.267303	0.789236	0.102793	10.4	89.6	14.6481	85.3519	4.24815	NO
TCGA-V5-A7RB-01A-11R-A353-13	ESCA	MIR660	hsa-mir-660	chrX	+	5p	50013286	NA	loop	NA	9	NA	C	G	267	5	53.4	5.73877	134.884	6.80812	2.6543e-38	1.36696e-35	-1.21246	0.225336	0.647169	98.1618	1.83824	99.2641	0.73592	1.10232	NO
TCGA-AP-A1E1-01A-11R-A136-13	UCEC	MIR660	hsa-mir-660	chrX	+	5p	50013284	NA	loop	NA	7	NA	C	T	444	17	26.1176	4.70695	70.0831	5.70179	1.27435e-70	6.5629e-68	-0.950699	0.341757	0.466283	96.3124	3.68764	98.5932	1.4068	2.28083	NO
TCGA-61-2110-01A-01R-1568-13	OV	MIR660	hsa-mir-660	chrX	+	5p	50013240	NA	flanking-5	NA	NA	-16	A	C	65	7	9.28571	3.21501	36.2251	4.27326	2.45497e-10	1.26431e-07	-0.774219	0.438801	0.357732	90.2778	9.72222	97.3136	2.68636	7.03587	NO
TCGA-05-4415-01A-22H-1857-13	LUAD	MIR664A	hsa-mir-664a	chr1	-	both	220200531	NA	flanking-3	NA	NA	18	T	C	6	59	0.101695	-3.29768	0.156274	-2.95022	2.97622e-16	1.53275e-13	-0.396121	0.692016	0.159884	9.23077	90.7692	13.5153	86.4847	4.28453	NO
TCGA-A5-A0VP-01A-21R-A103-13	UCEC	MIR671	hsa-mir-671	chr7	+	5p	151238515	NA	flanking-3	NA	NA	7	G	A	44	8	5.5	2.45943	2.20722	0.758792	1.76239e-91	9.07629e-89	1.71453	0.0864315	1.06333	84.6154	15.3846	68.8203	31.1797	15.7951	NO
TCGA-AJ-A23O-01A-11R-A156-13	UCEC	MIR671	hsa-mir-671	chr7	+	5p	151238446	NA	flanking-5	NA	NA	-3	A	T	48	12	4	2	2.20722	0.758792	1.78489e-63	9.19217e-61	1.25135	0.210809	0.676112	80	20	68.8203	31.1797	11.1797	NO
TCGA-PG-A917-01A-31R-A37P-13	UCEC	MIR671	hsa-mir-671	chr7	+	5p	151238532	NA	flanking-3	NA	NA	24	C	T	56	15	3.73333	1.90046	2.20722	0.758792	5.0405e-57	2.59586e-54	1.151	0.249734	0.602523	78.8732	21.1268	68.8203	31.1797	10.0529	NO
TCGA-D3-A51F-06A-11R-A25Z-13	SKCM	MIR6842	hsa-mir-6842	chr8	+	3p	27433458	NA	flanking-3	NA	NA	24	C	T	2	54	0.037037	-4.75489	0.0208807	-5.77071	5.40206e-30	2.78206e-27	1.46282	0.143517	0.843097	3.57143	96.4286	2.04536	97.9546	1.52607	NO
TCGA-13-0894-01B-01R-1565-13	OV	MIR6842	hsa-mir-6842	chr8	+	3p	27433455	NA	flanking-3	NA	NA	21	A	C	1	141	0.0070922	-7.13955	0.015428	-6.20555	2.05319e-55	1.05739e-52	-1.3181	0.18747	0.727069	0.704225	99.2958	1.51935	98.4806	0.815129	NO
TCGA-EE-A3AA-06A-11R-A18V-13	SKCM	MIR6892	hsa-mir-6892	chr7	+	5p	143382671	NA	flanking-5	NA	NA	-15	C	T	93	3	31	4.9542	111.539	6.41827	2.69894e-34	1.38996e-31	-1.5686	0.116741	0.932778	96.875	3.125	99.1114	0.888584	2.23642	NO
TCGA-EE-A20C-06A-11R-A18V-13	SKCM	MIR6892	hsa-mir-6892	chr7	+	5p	143382711	NA	loop	NA	5	NA	C	A	55	1	55	5.78136	111.539	6.41827	1.17843e-11	6.06894e-09	-0.682382	0.494998	0.305397	98.2143	1.78571	99.1114	0.888584	0.89713	NO
TCGA-CM-4746-01A-01T-1409-13	COAD	MIR708	hsa-mir-708	chr11	-	5p	79402074	COSN23012351	loop	NA	3	NA	AC	A	31	35	0.885714	-0.175087	0.618207	-0.820511	3.94242e-68	2.03035e-65	1.08458	0.278106	0.55579	46.9697	53.0303	38.2032	61.7968	8.76648	NO
TCGA-NH-A50V-01A-11H-A28I-13	COAD	MIR708	hsa-mir-708	chr11	-	5p	79402008	NA	flanking-3	NA	NA	24	T	A	513	991	0.517659	-0.949926	0.618207	-0.820511	2.10677e-05	0.0108498	-0.217473	0.82784	0.0820537	34.109	65.891	38.2032	61.7968	4.09417	NO
TCGA-IA-A83S-01A-11R-A359-13	KIRP	MIR744	hsa-mir-744	chr17	+	5p	12081900	NA	flanking-5	NA	NA	-9	TG	T	182	79	2.3038	1.20401	4.96174	2.15235	5.06741e-71	2.60971e-68	-1.41362	0.157474	0.802792	69.7318	30.2682	83.2264	16.7736	13.4946	NO
TCGA-LN-A7HY-01A-12R-A353-13	ESCA	MIR744	hsa-mir-744	chr17	+	5p	12081958	NA	loop	NA	28	NA	C	T	71	41	1.73171	0.792195	3.29838	1.51647	1.36139e-26	7.01117e-24	-0.95311	0.340534	0.467839	63.3929	36.6071	76.7354	23.2646	13.3426	NO
TCGA-AJ-A3BG-01A-11R-A19V-13	UCEC	MIR744	hsa-mir-744	chr17	+	5p	12081958	NA	loop	NA	28	NA	C	T	192	142	1.35211	0.435215	1.36455	0.220818	1.84149e-09	9.48365e-07	0.26473	0.791218	0.101704	57.485	42.515	57.7087	42.2913	0.223645	NO
TCGA-96-A4JK-01A-11H-A25B-13	LUSC	MIR744	hsa-mir-744	chr17	+	5p	12081994	NA	flanking-3	NA	NA	7	G	T	69	65	1.06154	0.0861566	1.21257	-0.00826313	0.0291975	1	0.101228	0.919369	0.0365101	51.4925	48.5075	54.8038	45.1962	3.31123	NO
TCGA-AP-A0LE-01A-11R-A103-13	UCEC	MIR744	hsa-mir-744	chr17	+	5p	12082007	NA	flanking-3	NA	NA	20	C	T	102	84	1.21429	0.280108	1.36455	0.220818	0.0912804	1	0.0732087	0.94164	0.0261151	54.8387	45.1613	57.7087	42.2913	2.86996	NO
TCGA-CN-6013-01A-11R-1685-13	HNSC	MIR758	hsa-mir-758	chr14	+	both	101026095	NA	flanking-3	NA	NA	3	C	T	60	15	4	2	1.02851	-0.24871	1.96619e-165	1.01259e-162	2.5894	0.00961423	2.01709	80	20	50.7027	49.2973	29.2973	NO
TCGA-CH-5772-01A-11R-1579-13	PRAD	MIR758	hsa-mir-758	chr14	+	both	101026099	NA	flanking-3	NA	NA	7	A	T	128	62	2.06452	1.0458	0.890654	-0.482356	1.99916e-70	1.02957e-67	1.70415	0.0883535	1.05378	67.3684	32.6316	47.1083	52.8917	20.2602	NO
TCGA-D5-6928-01A-11H-1927-13	COAD	MIR758	hsa-mir-758	chr14	+	both	101026018	NA	flanking-5	NA	NA	-16	G	A	30	35	0.857143	-0.222392	1.16374	-0.000862903	4.07044e-05	0.0209628	-0.274695	0.78355	0.105933	46.1538	53.8462	53.7837	46.2163	7.62985	NO
TCGA-4A-A93W-01A-11R-A37G-13	KIRP	MIR874	hsa-mir-874	chr5	-	3p	137647655	NA	flanking-5	NA	NA	-15	A	C	7	88	0.0795455	-3.65208	0.0382325	-4.97004	7.3797e-51	3.80054e-48	1.53993	0.123577	0.908063	7.36842	92.6316	3.68246	96.3175	3.68596	NO
TCGA-A5-A2K3-01A-11R-A17X-13	UCEC	MIR874	hsa-mir-874	chr5	-	3p	137647608	NA	loop	NA	10	NA	C	T	1	52	0.0192308	-5.70044	0.0435902	-4.79664	2.2885e-78	1.17858e-75	-1.0367	0.299874	0.523061	1.88679	98.1132	4.17695	95.8231	2.29015	NO
TCGA-XF-A8HD-01A-11R-A36A-13	BLCA	MIR877	hsa-mir-877	chr6	+	5p	30584326	NA	flanking-5	NA	NA	-6	G	C	114	25	4.56	2.18903	3.9171	1.70607	1.65963e-08	8.54711e-06	0.59744	0.550214	0.259468	82.0144	17.9856	79.6628	20.3372	2.35156	NO
TCGA-90-7766-01A-21H-2124-13	LUSC	MIR891A	hsa-mir-891a	chrX	-	5p	146027834	NA	loop	NA	7	NA	T	C	7185	2	3592.5	11.8108	861.353	7.86039	3.97868e-55	2.04902e-52	2.14341	0.0320806	1.49376	99.9722	0.027828	99.884	0.115962	0.0881338	NO
TCGA-EE-A20F-06A-21R-A18V-13	SKCM	MIR891A	hsa-mir-891a	chrX	-	5p	146027838	NA	loop	NA	3	NA	G	A	77	1	77	6.26679	1172.68	8.24086	1.26577e-31	6.51869e-29	-0.993948	0.320248	0.494513	98.7179	1.28205	99.9148	0.0852024	1.19685	NO
TCGA-55-8092-01A-11H-2240-13	LUAD	MIR93	hsa-mir-93	chr7	-	5p	100093770	NA	flanking-3	NA	NA	7	G	A	15336	72	213	7.73471	407.5	8.51512	8.5883e-96	4.42297e-93	-1.13787	0.255173	0.593165	99.5327	0.46729	99.7552	0.244798	0.222492	NO
TCGA-EE-A183-06A-11R-A18V-13	SKCM	MIR93	hsa-mir-93	chr7	-	5p	100093771	NA	flanking-3	NA	NA	6	G	A	13037	15	869.133	9.76343	605.498	9.04615	3.80889e-60	1.96158e-57	0.903616	0.366199	0.436283	99.8851	0.114925	99.8351	0.164881	0.049956	NO
TCGA-AG-A02N-01A-11R-A082-13	READ	MIR93	hsa-mir-93	chr7	-	5p	100093770	NA	flanking-3	NA	NA	7	G	A	13268	37	358.595	8.48621	396.093	8.40897	0.252428	1	0.0905237	0.927871	0.0325124	99.7219	0.278091	99.7482	0.25183	0.0262609	NO
TCGA-ED-A459-01A-11R-A25Z-13	LIHC	MIR98	hsa-mir-98	chrX	-	5p	53556227	NA	flanking-3	NA	NA	14	T	A	424	67	6.32836	2.66183	18.7095	4.06789	5.25731e-137	2.70751e-134	-2.09182	0.036455	1.43824	86.3544	13.6456	94.9263	5.0737	8.57192	NO
TCGA-CK-5913-01A-11H-1652-13	COAD	MIR99A	hsa-mir-99a	chr21	+	5p	16539135	NA	loop	NA	13	NA	G	A	170	1	170	7.40939	193.226	7.25651	0.611605	1	0.359777	0.719071	0.143228	99.4152	0.584795	99.4851	0.514863	0.0699324	NO
TCGA-G4-6628-01A-11H-1838-13	COAD	MIR99A	hsa-mir-99a	chr21	+	5p	16539135	NA	loop	NA	13	NA	G	A	1143	5	228.6	7.83668	193.226	7.25651	0.611605	1	0.359777	0.719071	0.143228	99.5645	0.43554	99.4851	0.514863	0.0793228	NO
TCGA-5M-AAT6-01A-11H-A41D-13	COAD	MIR99A	hsa-mir-99a	chr21	+	5p	16539077	NA	flanking-5	NA	NA	-24	T	C	2712	17	159.529	7.31768	193.226	7.25651	0.21541	1	0.0600403	0.952124	0.0213067	99.3771	0.622939	99.4851	0.514863	0.108076	NO
TCGA-G4-6304-01A-11H-1927-13	COAD	MIR99B	hsa-mir-99b	chr19	+	5p	51692648	COSN1082437	loop	NA	9	NA	G	A	32973	178	185.242	7.53326	366.577	8.39819	4.84501e-115	2.49518e-112	-1.46309	0.143444	0.843319	99.4631	0.536937	99.7279	0.272052	0.264885	NO
TCGA-BP-4987-01A-01R-1762-13	KIRC	MIR99B	hsa-mir-99b	chr19	+	5p	51692651	COSN2375503	loop	NA	12	NA	G	A	107214	217	494.074	8.94858	398.525	8.56322	3.25627e-65	1.67698e-62	0.841436	0.400103	0.397828	99.798	0.20199	99.7497	0.250297	0.0483073	NO
TCGA-ER-A19E-06A-11R-A18V-13	SKCM	MIR99B	hsa-mir-99b	chr19	+	5p	51692600	NA	flanking-5	NA	NA	-18	C	T	671951	2436	275.842	8.1077	262.352	7.90734	1.45208e-10	7.47819e-08	0.310499	0.756182	0.121374	99.6388	0.361217	99.6203	0.37972	0.0185027	NO
TCGA-LN-A4MQ-01A-11R-A28K-13	ESCA	MIR99B	hsa-mir-99b	chr19	+	5p	51692653	NA	loop	NA	14	NA	A	G	42599	230	185.213	7.53304	187.365	7.49425	0.186433	1	0.0972361	0.922539	0.0350153	99.463	0.537019	99.4691	0.530885	0.00613387	NO
TCGA-C8-A12K-01A-21R-A114-13	BRCA	MIRLET7B	hsa-let-7b	chr22	+	5p	46113723	NA	loop	NA	11	NA	G	A	126176	481	262.32	8.03518	298.413	7.98792	0.0501196	1	0.0590756	0.952892	0.0209564	99.6202	0.379766	99.666	0.333987	0.0457793	NO
TCGA-34-2600-01A-01T-1557-13	LUSC	MIRLET7C	hsa-let-7c	chr21	+	5p	16539908	COSN2378764	flanking-3	NA	NA	4	G	C	14259	155	91.9935	6.52346	170.57	7.05976	1.84314e-26	9.49218e-24	-0.518191	0.604325	0.218729	98.9247	1.07534	99.4171	0.582851	0.492492	NO
TCGA-B6-A0RT-01A-21R-A085-13	BRCA	MIRLET7C	hsa-let-7c	chr21	+	5p	16539919	NA	flanking-3	NA	NA	15	A	C	5682	72	78.9167	6.30226	166.37	6.86263	5.77255e-55	2.97287e-52	-0.497784	0.618636	0.208565	98.7487	1.2513	99.4025	0.597478	0.653825	NO
TCGA-AA-3833-01A-01T-0906-13	COAD	MIRLET7C	hsa-let-7c	chr21	+	5p	16539833	NA	flanking-5	NA	NA	-5	C	T	849	10	84.9	6.40769	215.708	6.9793	2.90775e-14	1.49749e-11	-0.3687	0.712352	0.147306	98.8359	1.16414	99.5385	0.46145	0.702694	NO
TCGA-AJ-A3BG-01A-11R-A19V-13	UCEC	MIRLET7D	hsa-let-7d	chr9	+	5p	94178817	NA	flanking-5	NA	NA	-24	GAA	G	458	1365	0.335531	-1.57548	0.785833	-0.493804	1.16339e-149	5.99144e-147	-1.61484	0.106346	0.97328	25.1234	74.8766	44.0037	55.9963	18.8803	NO
TCGA-D1-A0ZS-01A-11R-A119-13	UCEC	MIRLET7D	hsa-let-7d	chr9	+	5p	94178817	NA	flanking-5	NA	NA	-24	G	GA	1001	3098	0.323112	-1.6299	0.785833	-0.493804	0.209768	1	-0.88986	0.374003	0.427125	24.4206	75.5794	44.0037	55.9963	19.5831	NO
TCGA-BK-A13B-01A-51R-A22I-13	UCEC	MIRLET7D	hsa-let-7d	chr9	+	5p	94178817	NA	flanking-5	NA	NA	-24	G	GA	582	852	0.683099	-0.549834	0.785833	-0.493804	0.209768	1	-0.88986	0.374003	0.427125	40.5858	59.4142	44.0037	55.9963	3.41795	NO
TCGA-CM-6162-01A-11H-1652-13	COAD	MIRLET7D	hsa-let-7d	chr9	+	5p	94178817	NA	flanking-5	NA	NA	-24	GA	G	765	2031	0.376662	-1.40866	0.659932	-0.778681	0.552838	1	-0.420619	0.674485	0.171028	27.3605	72.6395	39.7566	60.2434	12.3961	NO
TCGA-AD-A5EJ-01A-11H-A28I-13	COAD	MIRLET7D	hsa-let-7d	chr9	+	5p	94178817	NA	flanking-5	NA	NA	-24	GA	G	1065	1818	0.585809	-0.771499	0.659932	-0.778681	0.552838	1	-0.420619	0.674485	0.171028	36.9407	63.0593	39.7566	60.2434	2.81589	NO
TCGA-VQ-A8PO-01A-11R-A415-13	STAD	MIRLET7D	hsa-let-7d	chr9	+	5p	94178817	NA	flanking-5	NA	NA	-24	GA	G	1448	1581	0.915876	-0.126776	0.939767	-0.226676	0.732901	1	0.24174	0.809013	0.0920445	47.8046	52.1954	48.4474	51.5526	0.642857	NO
TCGA-VQ-AA6D-01A-11R-A415-13	STAD	MIRLET7D	hsa-let-7d	chr9	+	5p	94178817	NA	flanking-5	NA	NA	-24	GA	G	1474	1496	0.985294	-0.0213737	0.939767	-0.226676	0.732901	1	0.24174	0.809013	0.0920445	49.6296	50.3704	48.4474	51.5526	1.18222	NO
TCGA-DI-A0WH-01A-12R-A12H-13	UCEC	MIRLET7D	hsa-let-7d	chr9	+	5p	94178817	NA	flanking-5	NA	NA	-24	GA	G	827	2641	0.313139	-1.67513	0.785833	-0.493804	0.984395	1	-0.00549129	0.996011	0.00173587	23.8466	76.1534	44.0217	55.9783	20.1751	NO
TCGA-DF-A2KY-01A-21R-A214-13	UCEC	MIRLET7D	hsa-let-7d	chr9	+	5p	94178817	NA	flanking-5	NA	NA	-24	GA	G	1320	3865	0.341527	-1.54993	0.785833	-0.493804	0.984395	1	-0.00549129	0.996011	0.00173587	25.4581	74.5419	44.0217	55.9783	18.5636	NO
TCGA-B5-A11G-01A-13R-A119-13	UCEC	MIRLET7D	hsa-let-7d	chr9	+	5p	94178817	NA	flanking-5	NA	NA	-24	GA	G	1401	3026	0.462987	-1.11096	0.785833	-0.493804	0.984395	1	-0.00549129	0.996011	0.00173587	31.6467	68.3533	44.0217	55.9783	12.375	NO
TCGA-EY-A2OP-01A-11R-A19V-13	UCEC	MIRLET7D	hsa-let-7d	chr9	+	5p	94178817	NA	flanking-5	NA	NA	-24	GA	G	494	799	0.618273	-0.693684	0.785833	-0.493804	0.984395	1	-0.00549129	0.996011	0.00173587	38.2057	61.7943	44.0217	55.9783	5.81597	NO
TCGA-AX-A2HJ-01A-11R-A17A-13	UCEC	MIRLET7D	hsa-let-7d	chr9	+	5p	94178817	NA	flanking-5	NA	NA	-24	GA	G	3393	5348	0.634443	-0.656438	0.785833	-0.493804	0.984395	1	-0.00549129	0.996011	0.00173587	38.8171	61.1829	44.0217	55.9783	5.20462	NO
TCGA-AP-A1DR-01A-11R-A136-13	UCEC	MIRLET7D	hsa-let-7d	chr9	+	5p	94178817	NA	flanking-5	NA	NA	-24	GA	G	1302	1980	0.657576	-0.604771	0.785833	-0.493804	0.984395	1	-0.00549129	0.996011	0.00173587	39.6709	60.3291	44.0217	55.9783	4.35076	NO
TCGA-EO-A3AU-01A-21R-A19V-13	UCEC	MIRLET7D	hsa-let-7d	chr9	+	5p	94178817	NA	flanking-5	NA	NA	-24	GA	G	1392	1876	0.742004	-0.430501	0.785833	-0.493804	0.984395	1	-0.00549129	0.996011	0.00173587	42.5949	57.4051	44.0217	55.9783	1.42683	NO
TCGA-AX-A2HG-01A-11R-A17A-13	UCEC	MIRLET7D	hsa-let-7d	chr9	+	5p	94178817	NA	flanking-5	NA	NA	-24	GA	G	858	913	0.939759	-0.0896372	0.785833	-0.493804	0.984395	1	-0.00549129	0.996011	0.00173587	48.4472	51.5528	44.0217	55.9783	4.42551	NO
TCGA-AX-A3FT-01A-11R-A22I-13	UCEC	MIRLET7D	hsa-let-7d	chr9	+	5p	94178817	NA	flanking-5	NA	NA	-24	GA	G	1697	1803	0.941209	-0.0874128	0.785833	-0.493804	0.984395	1	-0.00549129	0.996011	0.00173587	48.4857	51.5143	44.0217	55.9783	4.46402	NO
TCGA-AP-A1DM-01A-21R-A136-13	UCEC	MIRLET7D	hsa-let-7d	chr9	+	5p	94178817	NA	flanking-5	NA	NA	-24	GA	G	1518	1494	1.01606	0.0229916	0.785833	-0.493804	0.984395	1	-0.00549129	0.996011	0.00173587	50.3984	49.6016	44.0217	55.9783	6.37672	NO
TCGA-AX-A063-01A-11R-A00W-13	UCEC	MIRLET7D	hsa-let-7d	chr9	+	5p	94178817	NA	flanking-5	NA	NA	-24	GA	G	421	382	1.10209	0.140248	0.785833	-0.493804	0.984395	1	-0.00549129	0.996011	0.00173587	52.4284	47.5716	44.0217	55.9783	8.4067	NO
TCGA-BS-A0V4-01A-11R-A14C-13	UCEC	MIRLET7D	hsa-let-7d	chr9	+	5p	94178817	NA	flanking-5	NA	NA	-24	GA	G	1258	1132	1.11131	0.152258	0.785833	-0.493804	0.984395	1	-0.00549129	0.996011	0.00173587	52.636	47.364	44.0217	55.9783	8.61429	NO
TCGA-B5-A5OC-01A-21R-A27R-13	UCEC	MIRLET7D	hsa-let-7d	chr9	+	5p	94178817	NA	flanking-5	NA	NA	-24	GA	G	1191	908	1.31167	0.391409	0.785833	-0.493804	0.984395	1	-0.00549129	0.996011	0.00173587	56.7413	43.2587	44.0217	55.9783	12.7196	NO
TCGA-BR-6566-01A-11R-1802-13	STAD	MIRLET7E	hsa-let-7e	chr19	+	5p	51692782	NA	flanking-5	NA	NA	-11	GC	G	4153	87	47.7356	5.57699	115.574	6.42878	3.73748e-49	1.9248e-46	-0.795075	0.42657	0.37001	97.9481	2.05189	99.1422	0.857821	1.19407	NO
TCGA-A6-5659-01A-01T-1652-13	COAD	MIRLET7E	hsa-let-7e	chr19	+	5p	51692878	NA	flanking-3	NA	NA	19	G	A	2364	20	118.2	6.88509	91.0818	6.18874	7.01964e-41	3.61512e-38	0.696432	0.486159	0.313222	99.1611	0.838926	98.914	1.08599	0.247065	NO
TCGA-IN-8462-01A-11R-2343-13	STAD	MIRLET7E	hsa-let-7e	chr19	+	5p	51692779	NA	flanking-5	NA	NA	-14	C	T	5231	51	102.569	6.68045	115.574	6.42878	1.05681e-06	0.000544257	0.234915	0.814275	0.089229	99.0345	0.965543	99.1422	0.857821	0.107722	NO
TCGA-96-A4JK-01A-11H-A25B-13	LUSC	MIRLET7E	hsa-let-7e	chr19	+	5p	51692882	NA	flanking-3	NA	NA	23	C	T	2202	45	48.9333	5.61275	65.7994	5.80296	9.46582e-07	0.00048749	-0.227452	0.820072	0.086148	97.9973	2.00267	98.503	1.49702	0.50565	NO
TCGA-DX-AB32-01A-11R-A41D-13	SARC	MIRLET7G	hsa-let-7g	chr3	-	5p	52268271	NA	flanking-3	NA	NA	9	C	T	4330	404	10.7178	3.42194	38.4097	4.31546	5.62872e-28	2.89879e-25	-0.764346	0.444661	0.351971	91.466	8.53401	97.4626	2.53745	5.99656	NO
TCGA-AQ-A0Y5-01A-11R-A14L-13	BRCA	MIRLET7G	hsa-let-7g	chr3	-	5p	52268316	COSN23016349	loop	NA	20	NA	G	C	402	23	17.4783	4.12749	19.0699	3.67741	2.4971e-36	1.28601e-33	0.393313	0.694088	0.158585	94.5882	5.41176	95.0174	4.98259	0.42917	NO
TCGA-K4-A5RJ-01A-11R-A28I-13	BLCA	MIRLET7I	hsa-let-7i	chr12	+	5p	62603732	NA	loop	NA	20	NA	CCG	C	2846	71	40.0845	5.32497	17.2732	3.7804	5.54507e-108	2.85571e-105	1.4917	0.135779	0.867167	97.566	2.43401	94.5275	5.4725	3.03849	NO
TCGA-D1-A174-01A-11R-A12H-13	UCEC	MIRLET7I	hsa-let-7i	chr12	+	5p	62603773	NA	flanking-3	NA	NA	5	C	T	5105	1486	3.4354	1.78048	11.1912	3.14582	2.30358e-138	1.18634e-135	-1.47142	0.141176	0.850238	77.4541	22.5459	91.7973	8.20266	14.3432	NO
